# Supplementary material for: Population and single-cell genomics reveal the Aire dependency, relief from Polycomb silencing, and distribution of self-antigen expression in thymic epithelia
Source: Genome Res. 2014 Dec;24(12):1918–31. doi: 10.1101/gr.171645.113 (PMC4248310; doi:10.1101/gr.171645.113)
Supplement: Supplemental Material [file supp_gr.171645.113_Supplemental_Table2.xlsx]

## Sheet: Supp Table 2
Supplementary Table 2. Expression of genes in TEC and dynamic step tissue specificity calls.
Ensembl ID	Gene Symbol	GNF GeneAtlas Specificity	calculated FPKMs							CuffDiff FPKMs
			cTEC	mTEC	immature mTEC	mature mTEC	Aire neg mTEC	Aire pos mTEC	Aire ko mTEC	cTEC	mTEC	immature mTEC	mature mTEC	Aire neg mTEC	Aire pos mTEC	Aire knockout mTEC
ENSMUSG00000000001	Gnai3	NRE	43.4752	57.6292	36.7148	54.3518	41.8655	48.6022	43.4806	40.8958	53.4857	32.6877	50.0483	36.8241	43.6764	38.6023
ENSMUSG00000000003	Pbsn	TRE	0	0.282671	0	0.206316	0	0.156491	0	0	0.26984	0	0.148157	0	0.166852	0
ENSMUSG00000000028	Cdc45	TRE	5.16144	7.45122	4.20074	6.38001	6.19941	4.22043	4.73777	4.73912	6.96235	3.76726	5.7946	5.91328	3.72309	4.41445
ENSMUSG00000000037	Scml2	TRE	1.10525	0.706155	0.267088	0.779737	0.150174	0.316612	0.12988	1.03599	0.673827	0.258606	0.783518	0.149813	0.344814	0.146023
ENSMUSG00000000049	Apoh	TRE	0.309794	2.7459	0.361511	4.60813	4.56537	4.90367	4.70767	0.129279	2.91781	0.198283	4.65663	4.14624	5.04965	4.16503
ENSMUSG00000000056	Narf	TRE+NRE	8.97285	11.8371	10.6324	9.51895	9.07874	11.2315	9.98119	8.29296	10.697	9.20469	8.51898	7.79402	9.86	8.55946
ENSMUSG00000000058	Cav2	NRE	0.885162	4.03287	3.89733	3.46952	1.39112	2.40725	1.72763	1.3308	6.32568	5.65652	5.90636	2.16948	4.10736	2.85214
ENSMUSG00000000078	Klf6	NRE	60.6601	132.399	85.2314	105.867	146.339	118.423	164.526	60.3035	134.894	81.0404	104.786	138.88	113.228	155.756
ENSMUSG00000000085	Scmh1	TRE+NRE	28.1743	6.29915	14.1125	4.08452	5.56527	3.19765	5.38883	34.2266	7.93495	16.6003	5.25206	6.95359	4.28894	6.67275
ENSMUSG00000000088	Cox5a	NRE	109.694	138.339	104.663	152.13	120.572	129.52	121.893	91.8626	113.553	82.5568	123.892	94.0429	103.111	94.9664
ENSMUSG00000000093	Tbx2	TRE	0.0903917	0.530307	0.723974	0.455868	0.205032	0.661784	0.261129	0.0904266	0.494654	0.652421	0.447928	0.181244	0.580666	0.236053
ENSMUSG00000000094	Tbx4	TRE	0.0524799	0.700806	0.0538935	0.712737	0.100668	0.490346	0.093415	0.045626	0.684963	0.0388215	0.734192	0.0584885	0.454273	0.0551018
ENSMUSG00000000103	Zfy2	TRE	0.00963511	0.0547031	0.00378951	0.00518318	0.00253854	0.0229744	0.00246511	0	0.0234344	0	0	0	0.00823404	0
ENSMUSG00000000120	Ngfr	TRE	5.52667	8.49498	19.8093	5.55927	2.69763	5.23322	2.67027	5.43233	8.26435	18.4296	5.37259	2.52085	4.86971	2.47595
ENSMUSG00000000125	Wnt3	not detected	0.176414	2.1724	0.294882	2.94669	3.09088	3.78202	2.94279	0.176966	2.06567	0.285986	2.80837	2.78887	3.50451	2.68491
ENSMUSG00000000126	Wnt9a	NRE	2.80698	1.168	0.378254	1.37124	0.317808	1.28795	0.346149	2.81368	1.15479	0.361699	1.35991	0.297564	1.21644	0.323247
ENSMUSG00000000127	Fer	TRE+NRE	7.03072	6.75772	7.96978	6.67345	8.09887	6.35589	7.98973	8.62723	8.34118	9.5604	8.1497	9.48487	7.57962	9.47388
ENSMUSG00000000131	Xpo6	NRE	21.6619	25.264	21.5711	25.4433	31.391	26.8257	30.9634	22.0352	26.658	20.024	26.1527	30.5528	26.4499	28.8068
ENSMUSG00000000134	Tfe3	NRE	19.4614	12.9743	14.3047	12.9068	14.9517	13.6166	15.302	22.912	15.2327	15.2503	14.2873	15.6448	14.8411	17.9777
ENSMUSG00000000142	Axin2	NRE	7.84917	3.3393	3.12526	3.86284	6.61306	4.49668	6.78313	11.3059	4.91877	4.04554	5.01692	9.11852	5.87836	9.05497
ENSMUSG00000000148	Baat1	NRE	6.19485	4.93841	6.3036	4.89757	6.04497	5.41012	6.20116	6.91245	5.46984	6.70432	5.37323	6.31456	5.70651	6.44511
ENSMUSG00000000149	Gna12	NRE	34.6972	27.3166	41.5656	25.1614	34.7716	27.3894	31.372	41.1302	33.1204	45.2135	27.7448	39.4646	31.3091	34.7923
ENSMUSG00000000154	Slc22a18	TRE	3.04771	5.63446	7.17406	8.12952	4.00627	8.67894	4.92559	2.79723	4.97695	5.99311	7.11476	3.40656	7.33282	4.24631
ENSMUSG00000000157	Itgb2l	TRE	0.0110632	0.799576	0.0471377	1.32233	0.0194319	0.993231	0.0188698	0.00854581	0.747604	0.0332228	1.3399	0.0107128	0.861974	0.0350581
ENSMUSG00000000159	Igsf5	NRE	0.0270648	0.783753	0.567715	1.31262	0.350593	1.17824	0.3116	0.0574371	1.18776	0.729966	1.77876	0.51983	1.57789	0.512131
ENSMUSG00000000167	Pih1d2	TRE	1.80967	2.09843	2.20105	2.32462	1.21111	1.89628	1.46074	2.28842	2.9472	2.8306	3.05492	1.45873	2.3389	1.9588
ENSMUSG00000000168	Dlat	NRE	12.7197	10.7159	9.39124	10.7868	10.0062	8.98469	9.78554	11.1511	9.2728	7.7143	9.10969	7.98303	7.41551	7.76817
ENSMUSG00000000171	Sdhd	NRE	55.3697	54.6127	44.0034	55.5935	50.1341	54.2629	51.5965	52.6307	51.636	39.7243	52.3302	44.3313	49.0644	45.3655
ENSMUSG00000000182	Fgf23	not detected	0.152631	6.65638	0.289579	6.47826	0.0990818	3.94404	0.0689546	0.141161	6.4019	0.269698	6.05926	0.0756516	3.66726	0.045086
ENSMUSG00000000183	Fgf6	not present	0	0.508765	0	0.648638	0	0.229147	0.0112691	0	0.500684	0	0.614956	0	0.226433	0.0109752
ENSMUSG00000000184	Ccnd2	TRE+NRE	42.5904	113.071	45.3253	92.3282	106.551	76.5439	92.4416	42.8713	112.477	43.0712	90.9592	99.9496	73.329	87.5146
ENSMUSG00000000194	Gpr107	NRE	12.449	12.3015	12.2103	11.3599	14.6534	13.0498	15.4509	11.2402	10.7778	10.3858	9.90691	12.1559	11.1588	12.8983
ENSMUSG00000000197	Nalcn	TRE	0.159035	1.64841	0.170986	1.55913	0.225166	1.42083	0.277594	0.136291	1.4597	0.161346	1.3883	0.181083	1.22076	0.246392
ENSMUSG00000000202	Btbd17	not detected	0	1.74484	0.292108	1.93818	0.108248	1.50719	0.0970308	0	1.69297	0.266765	1.88833	0.101238	1.40882	0.087085
ENSMUSG00000000204	Slfn4	TRE	0.275089	2.09365	0.606265	2.25404	0.345497	1.27072	0.307647	0.213004	2.56359	0.262638	2.23138	0.308744	1.18681	0.227296
ENSMUSG00000000214	Th	TRE	0.0642732	5.88259	0.241503	8.59913	0.393108	8.25741	0.493322	0.133531	6.41409	0.34489	8.86512	0.667922	8.51009	0.944545
ENSMUSG00000000215	Ins2	TRE	0.0803925	9.51762	0.243726	10.85	0.0176507	15.3958	0	0.135175	14.5357	0.321032	16.0975	0.0254123	22.6157	0
ENSMUSG00000000216	Scnn1g	TRE	1.15751	2.17376	0.453109	2.94991	5.22935	3.85804	5.74185	1.05214	1.96145	0.401973	2.59981	4.44263	3.23507	4.85309
ENSMUSG00000000223	Drp2	TRE	0.377557	2.46723	2.03492	3.1106	2.73162	3.02596	2.49483	0.442988	3.2068	2.40811	4.03886	3.61667	4.00564	3.21142
ENSMUSG00000000244	Tspan32	NRE	0.33234	1.63168	0.178705	2.17366	0.088929	1.74474	0.152785	0.395078	1.81936	0.198118	2.4092	0.095281	1.9643	0.242625
ENSMUSG00000000247	Lhx2	TRE	0.0529262	0.719219	0.0189793	0.792911	0.0943294	0.556763	0.0836355	0.0823604	1.22433	0.0522349	1.54645	0.148874	0.944139	0.104714
ENSMUSG00000000248	Clec2g	TRE	2.32301	5.43743	10.3637	5.51358	4.14985	5.64095	4.29687	2.72468	6.23944	12.8106	6.5393	4.49187	7.12763	4.51333
ENSMUSG00000000253	Gmpr	NRE	86.9157	15.9131	39.7899	12.9709	7.39473	10.8531	5.80506	88.475	15.9435	37.3382	12.5323	7.00064	10.4528	5.34863
ENSMUSG00000000263	Glra1	TRE	0.00449585	0.946188	0.0176823	0.861602	0	0.594479	0.00575124	0.00596047	0.894561	0.0230796	0.786155	0	0.575634	0.00752445
ENSMUSG00000000266	Mid2	NRE	13.041	11.9461	8.58561	11.8433	13.7977	13.4775	14.8028	14.3774	12.7178	9.0105	13.3052	15.5279	15.3586	17.3323
ENSMUSG00000000275	Trim25	NRE	24.6529	19.9377	26.9503	16.9916	10.3813	15.7513	10.0867	26.7806	21.6809	28.9672	18.256	11.4599	17.547	10.7061
ENSMUSG00000000276	Dgke	TRE+NRE	3.34088	2.38221	3.10874	2.95438	2.22226	2.31756	2.14802	3.06149	2.0937	2.60685	2.58372	1.7116	1.87198	1.67877
ENSMUSG00000000278	Scpep1	NRE	3.2502	35.6834	8.75277	37.6746	56.6189	38.6992	53.7365	2.90368	30.396	7.03246	32.2887	45.3537	32.0757	44.4682
ENSMUSG00000000282	Mnt	NRE	12.1948	4.70545	7.80699	4.14264	5.38553	5.40734	5.68951	16.9984	6.2653	9.75958	5.19422	7.88779	7.40507	7.81011
ENSMUSG00000000290	Itgb2	NRE	15.534	2.52894	0.406011	2.69433	0.572845	2.06346	0.8274	14.0202	2.21274	0.414589	2.31798	0.461032	1.85696	0.68547
ENSMUSG00000000295	Hddc2	NRE	12.8871	7.29685	7.37919	5.17396	4.39397	3.9164	3.28096	10.6552	6.09896	5.85283	4.33821	3.40463	3.03204	2.61103
ENSMUSG00000000296	Tpd52l1	NRE	5.18946	2.52748	1.57322	2.20304	0.836411	1.33961	0.649773	4.75724	2.28448	1.32603	1.82632	0.734127	1.20314	0.557332
ENSMUSG00000000301	Pemt	TRE	3.06521	7.76915	1.77979	9.34678	5.56199	7.8747	5.88819	4.07141	9.80582	2.75916	11.7765	7.03427	9.7702	7.46254
ENSMUSG00000000303	Cdh1	NRE	117.404	144.978	195.906	110.308	93.961	112.057	91.395	111.093	135.28	174.88	102.357	84.2477	100.587	82.7827
ENSMUSG00000000305	Cdh4	TRE	89.6669	4.43273	1.6962	4.69489	4.0747	4.8709	3.98366	91.2988	4.65757	1.76656	5.14894	4.22182	4.91861	3.96641
ENSMUSG00000000308	Ckmt1	NRE	0.626777	88.5555	43.1954	107.64	102.641	150.996	123.506	0.643763	91.4536	44.5691	112.801	103.289	153.524	125.72
ENSMUSG00000000317	Bcl6b	TRE	0.0512387	0.241377	0.0598271	0.229339	0.0759359	0.156191	0.0737394	0.055082	0.239589	0.055717	0.218031	0.0996331	0.164509	0.072776
ENSMUSG00000000318	Clec10a	TRE	0.053562	0.848717	0.111913	1.23583	0.0970188	0.682117	0.0856477	0.0324351	0.460553	0.13628	0.760341	0.0919333	0.40241	0.068834
ENSMUSG00000000320	Alox12	TRE	0.327265	3.40258	1.86294	3.25865	2.01885	3.76133	2.18397	0.366575	4.18243	2.22033	3.99439	2.25431	4.40638	2.53595
ENSMUSG00000000325	Arvcf	TRE	15.9836	4.17794	6.51919	3.43171	3.45621	3.32835	3.14153	17.8506	4.30562	6.54032	3.80176	3.50931	3.68426	3.23391
ENSMUSG00000000326	Comt	NRE	76.1236	34.2953	65.1697	24.1094	27.325	25.3775	23.6279	115.823	52.6472	98.5456	36.2558	38.8404	37.2876	33.5622
ENSMUSG00000000339	Rtcd1	NRE	17.1193	17.5532	14.9093	15.9645	14.7502	14.4861	14.3279	14.8197	14.8472	12.1674	13.5346	11.6446	12.0678	11.7164
ENSMUSG00000000340	Dbt	NRE	18.2066	7.86752	7.07463	7.81935	6.57625	6.62353	6.62253	17.0246	7.2295	6.13953	7.03973	5.62666	5.7154	5.68177
ENSMUSG00000000346	Dazap2	NRE	91.5419	101.596	95.9078	105.413	109.88	105.04	117.934	88.8767	97.6497	87.8908	100.453	97.9151	94.8895	107.381
ENSMUSG00000000355	Mcts1	NRE	28.8036	22.8535	25.28	21.8079	16.1222	15.9254	16.2	28.1672	21.8534	23.6097	20.5169	14.8446	14.6555	14.4881
ENSMUSG00000000359	Rem1	not detected	0.0456831	3.64132	1.90581	4.15692	5.26145	4.16617	4.78784	0.0891455	3.63839	1.98357	4.37695	5.81731	4.68603	5.37083
ENSMUSG00000000365	Rnf17	TRE	0.122038	0.354261	0.082755	0.437196	0.03049	0.209807	0.0296081	0.115867	0.346623	0.0781314	0.384795	0.0301549	0.166449	0.0283086
ENSMUSG00000000374	Trappc10	NRE	19.9839	31.8564	24.4817	33.3936	49.7848	37.2344	48.4189	17.8725	28.1486	20.7148	29.4267	41.5003	31.7727	40.6259
ENSMUSG00000000378	Ccm2	NRE	10.7443	8.97643	10.6	7.77145	8.93566	8.52473	9.24683	12.5623	9.11423	10.8163	7.91937	8.41514	8.60024	9.26422
ENSMUSG00000000381	Wap	TRE	0.0234002	1.60799	0.0345125	1.91181	0.0431563	1.33911	0.0508882	0.062235	5.47122	0.0690177	6.50542	0.0463557	4.0372	0.050068
ENSMUSG00000000384	Tbrg4	NRE	9.91528	10.4415	10.6623	10.214	9.75669	9.1347	8.9807	9.57566	9.88076	9.53448	9.36803	8.80613	8.39205	7.88568
ENSMUSG00000000385	Tmprss2	NRE	5.62061	18.7386	6.95878	28.7412	36.5686	44.4488	50.0711	4.88721	16.2964	5.8305	24.7689	29.3373	37.0501	40.8667
ENSMUSG00000000386	Mx1	TRE	4.63023	13.4137	17.5271	11.1473	10.5149	10.1462	10.8133	4.94955	15.721	17.9223	12.0462	10.6521	10.4064	11.1988
ENSMUSG00000000392	Fap	TRE	3.09085	4.29064	1.40855	5.45381	1.4974	7.52057	2.5048	2.79891	3.5969	1.10263	4.351	1.14033	5.7766	1.92636
ENSMUSG00000000394	Gcg	TRE	0.115151	13.7047	4.22699	18.3803	3.43837	10.9725	4.00178	0.106229	14.0484	4.26556	18.6033	3.32526	11.1775	4.16512
ENSMUSG00000000399	Ndufa9	NRE	60.1512	61.0984	53.7357	66.0953	65.2019	62.6049	64.4501	47.8864	48.4533	41.262	52.0933	49.4011	47.8106	49.2176
ENSMUSG00000000402	Egfl6	TRE	0.0987173	0.947732	0.233449	0.829792	0.429682	0.524896	0.475482	0.0836138	0.814173	0.196671	0.695964	0.374715	0.447371	0.431797
ENSMUSG00000000409	Lck	TRE	25.7234	7.64797	3.63615	8.59561	2.82506	5.1267	3.16378	24.3109	7.19165	3.33615	8.06111	2.46812	4.65376	2.90643
ENSMUSG00000000411	Tssk3	TRE	0.0678312	2.11644	0.133391	2.10385	2.85941	2.84883	3.00447	0.0686302	2.07274	0.13046	2.04309	2.54153	2.70684	2.728
ENSMUSG00000000416	Cttnbp2	NRE	0.596906	2.0616	3.67739	2.06141	0.751117	2.29812	0.977839	0.757325	2.66037	4.78423	2.45213	0.80043	2.42136	1.17378
ENSMUSG00000000420	Galnt1	NRE	17.7973	21.4966	16.9589	21.7474	17.8071	17.0874	18.4819	18.9881	22.7938	17.2328	23.1682	18.3609	17.7145	19.1228
ENSMUSG00000000435	Myf5	not detected	0	0.0867034	0.00512302	0.120873	0	0.107295	0.00666514	0	0.0879201	0.00510879	0.117786	0	0.106096	0.00649136
ENSMUSG00000000439	Mkrn2	NRE	8.05253	8.00098	7.59851	8.7575	11.4249	9.01122	10.9023	7.00843	6.97051	6.52072	7.69567	9.77296	7.78245	9.36803
ENSMUSG00000000440	Pparg	NRE	0.41574	3.43771	0.537866	3.85679	1.59977	3.46839	2.18329	0.409653	3.37686	0.467595	3.78	1.46774	3.33801	2.01879
ENSMUSG00000000441	Raf1	NRE	29.9737	42.2272	40.3244	40.4197	49.6438	43.3121	47.6363	28.6917	40.0279	36.3487	38.027	44.8405	39.7562	43.0311
ENSMUSG00000000486	Sept1	TRE	16.069	31.58	9.65933	43.3595	39.2421	58.0358	48.0579	15.6441	29.2759	8.41408	39.3017	34.214	52.3554	42.5812
ENSMUSG00000000489	Pdgfb	NRE	0.516986	10.0958	3.91304	12.3537	7.57969	17.0115	10.3674	0.495735	9.60507	3.51775	11.7951	6.82033	15.6348	9.5068
ENSMUSG00000000530	Acvrl1	TRE	0.379191	1.09366	0.378168	1.36051	0.228353	0.926177	0.308368	0.510731	1.40097	0.550679	1.55242	0.225502	0.936936	0.30232
ENSMUSG00000000531	Grasp	TRE	2.68386	22.7701	10.1673	19.1887	21.1021	21.5203	19.8193	2.24356	18.9671	8.07315	15.8093	17.0597	17.364	15.8536
ENSMUSG00000000532	Acvr1b	NRE	13.8774	6.24413	15.4212	7.03602	4.91703	9.70972	5.44627	13.1253	5.83373	13.6938	6.52683	4.24473	8.76597	4.79913
ENSMUSG00000000538	Tom1l2	NRE	23.0989	10.4385	15.7896	11.9044	15.568	16.1486	17.3857	30.8714	13.7983	20.0764	14.888	19.7006	20.8828	22.5489
ENSMUSG00000000544	Gpa33	TRE	0.21145	18.7552	17.4474	37.0322	28.8954	57.0559	41.1481	0.261279	24.3388	19.947	45.2588	33.1105	68.465	48.6176
ENSMUSG00000000552	Zfp385a	NRE	15.8558	7.27469	16.3968	4.60272	4.41746	4.31715	3.00857	15.0651	6.83411	14.8568	4.25835	4.02579	3.94577	2.73264
ENSMUSG00000000555	Itga5	TRE	5.90359	4.26501	4.4425	3.39481	1.14925	2.26447	0.963823	4.85771	3.51348	3.43468	2.78443	0.902038	1.78429	0.77855
ENSMUSG00000000560	Gabra2	TRE	0.0256037	0.379201	0.0416348	0.365485	0.055986	0.223483	0.0608062	0.0192649	0.312452	0.0260841	0.326045	0.0401618	0.175118	0.0340816
ENSMUSG00000000561	Wdr77	TRE+NRE	19.3125	14.3285	12.8015	11.9325	14.2272	10.0058	12.6693	26.4591	19.462	18.2042	18.2149	22.0608	15.0345	19.6649
ENSMUSG00000000562	Adora3	TRE	0.176371	0.707289	0.287155	0.804231	3.35062	1.18881	3.34793	0.0845371	0.615381	0.149745	0.797417	3.07685	1.17406	3.34106
ENSMUSG00000000563	Atp5f1	NRE	119.491	154.259	95.4093	155.249	169.653	147.381	175.79	105.147	134.735	80.1109	134.79	137.947	122.864	144.239
ENSMUSG00000000567	Sox9	NRE	14.099	19.4767	40.817	14.7752	21.1846	17.8924	23.2163	18.3948	25.9639	53.2806	21.4989	35.9771	30.6005	39.3943
ENSMUSG00000000568	Hnrnpd	TRE+NRE	54.0238	38.4028	33.9973	29.3741	27.0287	21.8213	23.483	166.746	117.979	96.8414	86.393	76.9574	61.1305	65.8577
ENSMUSG00000000579	Dynlt1c	NRE	13.637	8.25716	11.2043	9.10579	9.06347	8.89533	8.06824	2.72817	1.81905	2.82212	2.25149	2.5855	2.07961	2.28308
ENSMUSG00000000581	C1d	NRE	16.4883	11.38	9.7176	10.7313	8.20315	8.4489	8.57151	29.3345	20.5452	17.6322	20.3965	15.8813	16.446	16.0282
ENSMUSG00000000594	Gm2a	NRE	0.882658	10.1848	7.74897	6.89739	1.1135	6.09631	1.50822	0.86509	9.97529	7.24467	6.68735	1.0081	5.74878	1.43871
ENSMUSG00000000600	Krit1	NRE	7.80713	6.03439	6.89002	6.43499	6.38962	5.25914	6.39807	13.4562	10.0309	11.0649	10.6112	11.0228	9.07235	10.8544
ENSMUSG00000000605	Clcn4-2	NRE	9.98424	13.172	18.1287	13.9764	13.811	14.4012	14.0486	9.57358	12.6573	16.4934	13.2316	13.1851	14.0805	13.4811
ENSMUSG00000000606	Vmn2r88	not detected	0.0197211	0.0861213	0.00617318	0.125508	0.00262028	0.0500749	0.00372817	0.0200914	0.0592021	0	0.0925611	0	0.0330903	0
ENSMUSG00000000617	Grm6	not present	0.040498	0.352928	0.0328451	0.419171	0.0600345	0.445991	0.0748001	0.035952	0.341046	0.0192456	0.395904	0.038033	0.413927	0.0439309
ENSMUSG00000000627	Sema4f	TRE	0.0340744	1.06198	0.0461575	0.925575	0.064798	0.505536	0.0696715	0.0277987	1.2372	0.0361052	1.07215	0.0416085	0.56184	0.0631326
ENSMUSG00000000628	Hk2	NRE	2.83657	10.7651	1.5383	7.97357	14.7354	11.721	17.2151	2.82611	10.7698	1.45495	7.95723	14.7962	11.9713	16.89
ENSMUSG00000000631	Myo18a	NRE	30.8148	24.8078	33.1133	24.2867	31.7642	27.318	28.9216	38.3115	38.5147	39.3137	37.936	49.3432	42.0065	45.1049
ENSMUSG00000000632	Sez6	TRE	0.0279258	5.89461	5.58151	7.17757	5.9362	10.2798	6.09087	0.0440568	5.70439	5.29663	7.46839	5.43598	9.7321	5.87114
ENSMUSG00000000673	Haao	TRE	0.053288	0.912839	0.0611283	1.10185	0.924277	0.866334	0.931625	0.0377101	0.784944	0.0516542	0.929272	0.673186	0.646968	0.677549
ENSMUSG00000000682	Cd52	NRE	5.76433	398.596	15.6332	462.261	708.01	575.169	825.933	5.39116	352.418	13.4437	408.508	626.813	516.694	737.019
ENSMUSG00000000686	Abhd15	TRE	1.46197	1.72395	1.73108	1.90022	3.41999	2.58383	3.29605	0.941589	1.34902	1.34722	1.75896	3.39699	2.38046	3.14957
ENSMUSG00000000690	Hoxb6	TRE	0.0211391	1.25786	0.179622	1.12868	0.126385	0.746908	0.195512	0.0109185	1.35512	0.171892	1.34505	0.144254	0.861268	0.171749
ENSMUSG00000000693	Loxl3	TRE	2.48858	7.26308	3.84874	10.8267	12.6515	14.1539	13.8089	0.645633	3.80087	1.35273	6.37395	7.37497	9.4206	8.46048
ENSMUSG00000000701	Tcl1b5	not present	0	0.32379	0	0.238289	0.0172005	0.146234	0.00668118	0	0.237007	0	0.139507	0.01174	0.089475	0
ENSMUSG00000000706	Btn1a1	TRE	0.0366567	0.770232	0.0486763	0.796594	0.132369	0.402918	0.182905	0.0197206	0.90825	0.0511274	0.950522	0.104841	0.434818	0.209168
ENSMUSG00000000708	Kat2b	NRE	14.5156	8.40734	12.5416	8.01655	5.00564	7.26965	5.33719	16.7542	10.3443	13.8745	9.12003	5.85046	9.50759	6.79638
ENSMUSG00000000711	Rab5b	NRE	26.5754	20.8984	26.8147	19.7932	20.793	21.7628	21.6584	25.7779	19.8873	24.6426	19.0018	18.8951	20.1417	19.9384
ENSMUSG00000000724	Cryba1	TRE	0.0659356	3.25295	0.0388989	4.48915	0.0347437	2.20108	0.0337387	0.0599987	2.8912	0.0405664	4.01199	0	1.79451	0.0380586
ENSMUSG00000000730	Dnmt3l	TRE	0.0650367	15.5695	0.523571	19.1605	15.9302	26.9651	25.8015	0.113861	19.544	0.623538	23.6422	19.9014	32.2891	32.0817
ENSMUSG00000000731	Aire	not detected	1.67443	505.26	31.3998	684.555	2.10988	522.475	39.2506	1.44099	405.641	24.2284	545.987	1.48569	406.078	26.7205
ENSMUSG00000000732	Icosl	TRE	1.70318	147.147	36.1216	161.11	353.724	171.667	304.626	1.74387	146.785	34.553	160.23	332.499	165.328	287.772
ENSMUSG00000000738	Spg7	NRE	12.2246	18.138	18.265	20.8971	21.7091	23.047	21.906	18.3958	27.0475	25.9506	30.1607	31.4057	34.3749	30.581
ENSMUSG00000000739	Sult5a1	TRE	2.30102	8.56736	53.3151	2.02964	4.45479	1.33279	1.73991	2.18715	7.67607	45.0944	1.85631	3.89864	1.09236	1.41654
ENSMUSG00000000740	Rpl13	NRE	371.084	325.218	337.303	324.178	359.522	280.619	334.856	79.2598	69.129	68.0552	65.0956	66.8005	54.9678	63.016
ENSMUSG00000000743	Chmp1a	NRE	39.4511	35.4951	39.1595	36.1656	35.9965	39.697	37.7968	37.0141	32.6513	34.8678	32.9438	31.0896	35.1912	32.4615
ENSMUSG00000000751	Rpa1	NRE	13.0288	12.1574	9.81226	10.8137	9.50727	8.04626	7.34671	19.621	18.0568	14.0422	15.8285	13.2422	11.4615	10.3539
ENSMUSG00000000753	Serpinf1	NRE	45.5584	2.66521	0.834858	2.2487	1.74339	1.83795	1.81432	76.9921	4.34276	1.36117	3.66927	2.57475	2.77743	2.90595
ENSMUSG00000000759	Tubgcp3	NRE	26.6594	15.1591	18.5995	17.4539	23.2548	16.2084	21.551	23.0681	13.0301	15.144	14.7849	18.9814	13.2452	17.6568
ENSMUSG00000000766	Oprm1	not detected	0.0181185	0.255885	0.0572515	0.235149	0.274871	0.246992	0.261767	0.0291568	0.46836	0.158871	0.521574	0.419792	0.53283	0.386279
ENSMUSG00000000776	Polr3d	TRE+NRE	7.52665	8.30091	8.18703	7.29792	7.11713	6.96933	6.74864	6.7217	7.37524	7.01884	6.47136	6.05758	5.84583	5.52217
ENSMUSG00000000782	Tcf7	TRE	52.3005	33.525	4.31058	35.8069	58.0047	38.3833	63.247	54.4249	34.344	4.31654	36.565	56.4364	37.913	61.0481
ENSMUSG00000000787	Ddx3x	NRE	133.936	99.4886	117.65	99.0433	81.7982	77.0116	80.7829	122.225	90.4664	101.687	88.9902	67.8641	65.4725	68.0392
ENSMUSG00000000791	Il12rb1	not detected	1.68102	2.9878	2.1766	4.61041	13.1674	6.91526	15.6956	1.43657	2.56428	1.78771	3.96452	10.726	5.75212	12.8853
ENSMUSG00000000792	Slc5a5	TRE	2.99866	1.81053	1.86237	1.49174	3.3643	2.29393	3.67476	2.62709	1.61115	1.61929	1.37672	2.81239	2.01381	3.24611
ENSMUSG00000000794	Kcnn3	not detected	15.339	3.67262	5.67604	2.58869	3.22866	1.89323	2.1374	12.8702	3.23017	4.77144	2.24893	2.64885	1.56359	1.80351
ENSMUSG00000000804	Usp32	TRE+NRE	11.7129	7.82141	5.65961	8.34026	9.30581	9.27951	9.98381	18.1937	10.7194	7.58198	11.585	13.4953	14.9173	14.574
ENSMUSG00000000805	Car4	NRE	0.198583	27.1171	1.22248	30.511	1.08052	23.114	1.39166	0.168329	22.8367	1.10106	25.2273	0.809125	18.3699	1.13593
ENSMUSG00000000811	Txnrd3	TRE	50.7978	12.8788	14.9834	11.6108	18.8796	13.5754	18.0887	42.5487	10.5344	11.8993	9.63027	14.8986	10.8631	14.5331
ENSMUSG00000000817	Fasl	TRE	0.028015	0.170023	0.0165275	0.141286	0.0221431	0.109309	0.0286701	0.0418563	0.167372	0.016106	0.144181	0.0306857	0.12213	0.0281939
ENSMUSG00000000823	Znf512b	TRE	15.2484	7.92949	13.6818	7.06496	7.89292	7.0159	7.02849	18.107	9.50125	15.6154	8.50275	8.46018	7.91564	7.76929
ENSMUSG00000000826	Dnajc5	NRE	14.6616	14.8325	16.4234	13.7419	14.7576	14.7368	15.5808	22.2535	24.0274	24.4631	21.2424	27.2656	25.8619	27.9262
ENSMUSG00000000827	Tpd52l2	NRE	21.3921	20.6972	19.8477	20.8292	23.0407	21.0403	23.8926	47.3347	47.3848	41.2335	46.3975	49.5859	45.8704	52.7553
ENSMUSG00000000838	Fmr1	NRE	23.0955	22.7529	16.3626	22.0991	13.7339	15.0509	13.7253	24.1902	23.8355	16.9884	24.0031	14.6271	16.1688	14.6431
ENSMUSG00000000861	Bcl11a	TRE	8.86311	1.80957	3.30348	1.14933	0.745185	0.8643	0.60326	18.6515	3.65141	6.51317	2.22013	1.47152	1.61642	1.12622
ENSMUSG00000000869	Il4	TRE	0.0441627	5.67391	0.13027	4.72731	8.06482	5.21732	10.2537	0.0628094	7.85569	0.15604	6.77906	10.7197	7.16674	14.0317
ENSMUSG00000000876	Pxmp4	TRE+NRE	3.75025	3.86747	3.0953	3.80815	4.80145	4.89333	5.79164	5.74529	6.40949	4.69238	6.77793	7.57647	7.93759	9.23144
ENSMUSG00000000881	Dlg3	NRE	10.0668	7.1173	8.00698	6.10805	7.2932	7.50449	7.48663	12.9496	9.14101	9.84592	7.69685	8.7911	9.20962	9.10822
ENSMUSG00000000884	Gnb1l	TRE	0.792007	1.16507	1.08552	0.82109	0.654265	0.755951	0.621555	2.16196	2.94914	2.23464	1.52932	1.89258	1.50937	1.73296
ENSMUSG00000000889	Dbh	TRE	0.0255164	3.03059	0.209076	3.21286	1.77032	3.38321	1.38182	0.0272971	2.62594	0.17214	2.76059	1.3324	2.78897	1.10593
ENSMUSG00000000901	Mmp11	TRE	0.483831	0.951862	4.04836	0.468878	0.168715	0.31875	0.218447	0.633432	1.08791	4.45928	0.592616	0.210538	0.290967	0.203666
ENSMUSG00000000902	Smarcb1	NRE	67.0267	40.2562	44.8136	36.6559	38.0194	32.7563	32.4196	64.8073	38.5562	41.8419	35.1403	34.5304	30.1422	29.9518
ENSMUSG00000000903	Vpreb3	TRE	0.0126344	2.23852	1.81995	2.02626	0.299589	1.49261	0.387897	0.0188643	2.57638	1.95168	2.37814	0.303294	1.66032	0.353494
ENSMUSG00000000915	Hip1r	TRE+NRE	31.3625	26.1594	40.5484	27.3014	29.9792	38.2438	33.6172	26.8459	22.2242	33.0714	23.043	24.1158	31.196	27.3085
ENSMUSG00000000916	Nsun5	TRE+NRE	9.2998	7.38876	10.0385	6.7936	7.55328	6.43996	6.9696	5.37935	4.11967	6.62969	3.99983	4.33349	3.66098	4.02869
ENSMUSG00000000934	Top1mt	NRE	12.2674	6.11854	8.50112	6.32192	6.35591	4.79664	4.88074	10.1852	5.01012	6.58677	5.20749	4.95103	3.8242	3.74868
ENSMUSG00000000938	Hoxa10	TRE	0	0.517323	0.0237743	0.425054	0.245716	0.273294	0.238609	0	0.829203	0.0284736	0.838496	0.498075	0.528038	0.489626
ENSMUSG00000000942	Hoxa4	TRE	1.47067	0.226604	0.957334	0.0755431	0.0448465	0.0221384	0.0435492	1.54069	0.263916	1.00105	0.0853067	0.0406541	0.0219554	0.0426611
ENSMUSG00000000948	Snrpn	TRE+NRE	4.07087	26.0007	8.28059	24.3864	54.2506	34.1556	54.4	3.84595	23.929	7.35917	22.5428	46.6476	29.6353	48.1469
ENSMUSG00000000957	Mmp14	TRE+NRE	95.7651	78.2239	113.442	53.5243	51.8618	46.2027	44.4229	88.2097	71.0641	98.5971	48.1241	45.0714	40.5611	38.721
ENSMUSG00000000958	Slc7a7	TRE	3.5571	26.3861	21.1545	33.1782	41.8834	32.6977	40.8554	3.18544	24.9207	19.1082	31.6549	37.9432	30.1763	37.7097
ENSMUSG00000000959	Oxa1l	NRE	16.348	13.9651	17.2071	13.7462	14.4945	14.6688	13.763	14.1346	9.97408	12.7304	9.37658	9.16238	9.92178	8.6038
ENSMUSG00000000976	Heatr6	NRE	5.87702	5.90038	6.56061	5.52047	6.47562	5.81561	6.2206	5.217	5.25276	5.54663	4.76273	5.35651	4.95137	5.1888
ENSMUSG00000000982	Ccl3	TRE	0.155852	4.66001	2.31257	5.38769	1.49316	6.69533	1.35935	0.165085	4.36138	1.85372	4.9072	1.34266	5.85987	1.13368
ENSMUSG00000000983	Expi	TRE	2.83303	319.374	1043.8	387.217	230.248	327.611	138.728	2.44979	263.551	821.109	319.74	189.749	266.204	117.568
ENSMUSG00000001014	Icam4	TRE	0.670086	1.26501	0.470618	1.61729	3.7516	1.95832	3.52062	0.568125	1.00274	0.379152	1.2758	3.14208	1.55135	3.12894
ENSMUSG00000001016	Ilf2	NRE	32.2674	36.9703	35.5348	32.4911	31.0941	25.1474	26.2259	25.2598	28.4897	26.5924	24.962	22.9336	19.011	19.4303
ENSMUSG00000001017	2500003M10Rik	NRE	51.0243	33.8165	37.0193	32.4268	33.557	31.081	31.6186	80.4287	53.2796	52.3395	50.5684	54.8387	50.7972	52.1878
ENSMUSG00000001018	Snapin	NRE	28.1159	18.9418	19.7698	21.7097	26.1155	19.9635	26.9879	38.4742	25.5456	25.3509	30.0069	37.2236	28.6024	37.9962
ENSMUSG00000001020	S100a4	NRE	5.96806	60.9538	10.5222	70.5538	161.391	92.9762	151.693	4.77442	51.8129	8.54115	59.5711	131.197	77.7269	126.122
ENSMUSG00000001021	S100a3	not detected	14.2369	51.0893	13.1742	61.4071	109.959	82.0924	106.154	13.4242	46.8813	11.5703	56.5793	96.3615	73.5722	94.4232
ENSMUSG00000001023	S100a5	TRE	0	4.45114	0.24702	5.068	11.0868	5.71807	10.6376	0	4.03612	0.248717	4.60187	9.35856	5.13917	9.15751
ENSMUSG00000001025	S100a6	NRE	5.44914	104.878	108.048	120.522	238.675	137.408	239.843	4.89868	92.3816	89.7718	104.537	195.229	115.697	199.646
ENSMUSG00000001027	Scn4a	TRE	0.0781323	2.138	0.539116	2.14967	2.31693	2.33701	2.35214	0.0716166	1.95563	0.457162	1.97996	2.00942	2.105	2.07171
ENSMUSG00000001029	Icam2	TRE	1.8509	0.53156	0.29329	1.08774	0.513847	1.01962	0.772936	2.15486	0.520654	0.29551	1.19139	0.478855	1.0489	0.719431
ENSMUSG00000001034	Mapk7	NRE	6.07934	3.92697	6.54376	3.55458	3.96412	3.72045	3.59912	7.82681	4.69422	7.89396	4.22327	4.77623	4.52344	4.45525
ENSMUSG00000001036	Epn2	NRE	6.70183	5.91235	9.84586	7.05057	7.11966	6.6838	7.10105	9.00743	7.60394	11.0874	8.9231	8.64082	8.0739	7.74952
ENSMUSG00000001039	B9d1	TRE	16.0937	10.8871	13.5816	13.0923	10.5667	11.4018	9.75287	13.763	8.90914	10.767	10.7905	8.32093	8.76809	7.78872
ENSMUSG00000001052	Sec24b	TRE+NRE	27.8191	31.1696	26.5275	33.3203	46.0493	36.0778	44.1308	28.371	31.5371	25.2829	33.3883	43.7511	35.5933	42.5252
ENSMUSG00000001053	N4bp3	TRE	1.93747	4.1864	5.04225	3.26641	4.61195	5.05787	5.85773	2.2702	4.92009	5.53268	3.73821	5.33181	5.87566	6.69297
ENSMUSG00000001054	Rmnd5b	NRE	18.2346	12.5376	13.1497	11.8324	14.815	15.1867	14.8205	18.0641	11.5297	12.1685	11.4574	14.1664	14.2041	14.1107
ENSMUSG00000001056	Nhp2	NRE	29.3406	29.5364	23.442	28.7855	24.2309	23.2323	23.4367	25.0785	25.2419	19.4684	24.482	19.9476	19.3388	19.4827
ENSMUSG00000001062	1300018I17Rik	NRE	7.21329	4.65214	9.00286	4.90479	5.42369	6.3452	6.15948	6.58829	4.18702	7.78064	4.42482	4.64156	5.45823	5.28335
ENSMUSG00000001065	Zfp276	NRE	4.5694	4.44155	8.31997	4.84556	6.0651	6.38276	6.44895	4.09783	3.75095	7.039	4.06954	5.04234	5.45938	5.42937
ENSMUSG00000001076	C1ql4	not present	0.0372528	5.02013	0.268613	4.23346	5.9053	5.54498	7.11648	0.0404699	4.64774	0.228006	3.95	5.008	4.97625	6.22291
ENSMUSG00000001082	Mfsd10	NRE	23.4893	10.2336	15.5971	8.72777	8.14817	6.32522	7.62614	23.0115	10.1119	13.9593	8.87048	8.30961	6.88786	6.95129
ENSMUSG00000001089	Luzp1	NRE	18.5144	7.31404	10.9565	5.16227	5.24681	5.19097	4.81188	21.4459	8.60056	12.6869	6.07676	5.87936	5.90725	5.4898
ENSMUSG00000001095	Slc13a2	TRE	10.304	7.75196	2.56163	10.4522	15.7552	13.2601	15.8463	7.21581	5.54474	1.91188	7.85502	11.3497	9.68785	11.2828
ENSMUSG00000001098	Kctd10	NRE	52.2499	19.2851	21.202	18.001	18.1595	19.0897	19.2487	54.3238	19.127	20.67	17.2943	17.1993	18.1769	18.5523
ENSMUSG00000001100	Poldip2	NRE	40.5587	19.2044	21.2178	16.0419	15.3272	14.7408	14.992	34.4853	16.1382	17.0719	13.4707	12.4319	11.9896	12.0821
ENSMUSG00000001103	Sebox	not detected	0.0159956	0.743738	0.0314554	0.790563	0.0316073	0.277386	0.010231	0.0173085	0.767104	0.0324632	0.720898	0.0299533	0.259345	0.010502
ENSMUSG00000001105	Ift20	NRE	42.0697	30.4746	25.3446	28.9469	29.4564	30.2029	29.289	51.5748	37.1433	28.5616	34.5465	32.9525	33.1516	33.5538
ENSMUSG00000001119	Col6a1	NRE	43.4819	30.6843	225.387	15.212	13.9825	10.3372	6.18057	34.9416	24.4719	175.133	12.114	10.7569	8.11603	4.83628
ENSMUSG00000001120	Pcbp3	TRE	11.2966	3.8307	2.78806	5.29364	3.16741	5.07718	3.25079	14.0626	4.64593	3.57748	6.91835	3.89264	5.91076	3.78236
ENSMUSG00000001123	Lgals9	NRE	349.745	62.3592	195.516	39.4916	32.893	43.1136	30.8139	325.803	57.7825	170.683	35.4474	28.35	37.8602	26.5737
ENSMUSG00000001127	Araf	TRE+NRE	19.4032	17.7054	24.0591	22.7749	28.7027	29.744	31.8822	38.6021	36.5232	47.6121	48.2364	59.5486	63.3403	66.8886
ENSMUSG00000001128	Cfp	TRE	1.65183	5.682	4.90513	5.66079	2.42945	5.7017	3.30963	1.39168	4.9241	3.99085	4.86783	1.94887	4.73411	2.68172
ENSMUSG00000001131	Timp1	TRE	3.40378	27.5582	23.8241	27.3795	13.8623	22.0091	16.4476	2.89329	24.1913	19.5942	23.5098	11.0028	17.9608	13.5325
ENSMUSG00000001134	Uxt	NRE	16.0624	17.69	16.3179	18.7411	17.2545	14.949	14.6372	12.0496	12.9103	11.5736	13.599	12.1252	10.4185	10.112
ENSMUSG00000001138	Cnnm3	NRE	4.48575	3.36088	6.75976	3.26434	3.14898	3.05285	2.89392	4.43498	3.20017	6.15168	3.06863	2.83359	2.75532	2.64447
ENSMUSG00000001143	Lman2l	TRE+NRE	5.04273	4.71117	7.8445	5.55687	6.2092	5.97343	6.14133	7.24091	6.69797	10.489	7.85572	8.18377	8.07021	8.7895
ENSMUSG00000001150	Mcm3ap	NRE	12.9786	11.0819	12.7165	10.7577	13.9632	11.8361	13.5593	11.4396	9.7228	10.6714	9.3198	11.5296	10.0152	11.312
ENSMUSG00000001151	Pcnt	TRE+NRE	5.50508	8.78435	8.49446	7.44571	7.73661	6.95529	6.815	5.0207	7.97382	7.35441	6.68039	6.72103	6.11523	5.89777
ENSMUSG00000001155	Ftcd	TRE	0.00561458	0.489141	0.0276028	0.639936	0.0147926	0.547677	0.0430941	0	0.414971	0.0165157	0.513019	0.0165661	0.40315	0.0209853
ENSMUSG00000001156	Mxd1	TRE+NRE	2.74235	49.5044	16.3182	57.1365	80.4646	88.8323	97.652	2.67425	48.2658	15.2951	55.4776	73.604	83.0298	90.1812
ENSMUSG00000001157	Gmcl1	TRE+NRE	12.5468	18.1762	13.6612	23.6863	33.5179	26.8035	34.6895	12.1149	17.6719	12.845	22.8033	30.5634	24.8281	32.2221
ENSMUSG00000001158	Snrnp27	NRE	25.7013	23.5045	18.3718	24.3879	23.5142	20.1994	23.8359	34.3778	31.3241	23.1169	31.7648	28.9713	26.386	30.088
ENSMUSG00000001166	Oas1c	TRE	0.738923	4.88703	1.8616	5.61521	0.469255	3.82827	0.639158	0.828452	4.725	2.25635	4.90023	0.435915	3.56584	0.636154
ENSMUSG00000001168	Oas1h	not detected	0.327425	9.14524	1.58102	12.8408	0.146584	8.39945	0.150391	0.30663	10.0181	1.24944	13.8181	0.122072	8.70159	0.0904429
ENSMUSG00000001173	Ocrl	TRE+NRE	7.19811	2.87675	6.29518	2.62696	2.11275	2.16572	1.96779	10.3972	4.40114	8.77161	3.85191	2.99527	3.18576	2.8943
ENSMUSG00000001175	Calm1	NRE	109.876	74.9657	75.9462	70.5303	54.524	62.1954	52.8314	106.697	71.8715	70.2479	67.427	48.5705	57.0064	47.4705
ENSMUSG00000001211	Agpat3	NRE	45.8518	18.1203	13.1803	19.5926	23.1709	23.5632	24.4018	108.609	49.7546	31.615	52.5567	62.5369	69.9045	68.9608
ENSMUSG00000001225	Slc26a3	TRE	0.235077	0.748392	0.287602	1.23654	0.607703	0.995867	0.489413	0.419817	1.01821	0.594259	1.67149	1.01038	1.57104	0.875169
ENSMUSG00000001227	Sema6b	NRE	0.133718	1.09256	0.434685	1.5139	2.6962	2.59985	2.92541	0.122457	0.957558	0.390274	1.36514	2.33043	2.33551	2.6312
ENSMUSG00000001228	Uhrf1	TRE+NRE	20.5073	41.9699	17.2895	30.0864	36.2982	21.6407	24.4333	22.7585	46.758	17.2776	31.3905	35.941	21.3388	24.065
ENSMUSG00000001229	Dpp9	NRE	16.5827	15.592	20.0075	16.244	23.3778	18.5056	22.6175	14.8268	13.736	17.0167	14.366	19.6476	15.8937	19.2584
ENSMUSG00000001240	Ramp2	TRE+NRE	0.196434	1.88164	0.607027	2.19362	0.147869	1.33825	0.0807701	0.394567	4.00604	1.3363	4.84053	0.278659	2.94554	0.23621
ENSMUSG00000001247	Lsr	NRE	15.3534	49.2423	60.0904	49.7738	48.6352	59.757	52.0238	14.7403	47.6178	56.2527	47.8081	43.8659	55.7206	47.9922
ENSMUSG00000001248	Gramd1a	NRE	18.1382	12.4135	22.1658	13.0685	15.9223	13.4157	15.1616	15.0349	10.1716	17.2416	10.607	12.5369	10.4617	11.6944
ENSMUSG00000001249	Hpn	TRE	2.41178	7.67268	4.74036	7.63551	8.5912	11.6562	10.7385	3.17678	10.5104	6.33888	10.4	10.1069	13.7828	11.9398
ENSMUSG00000001260	Gabrg1	TRE	0	0.0445345	0.00894677	0.0435948	0.14384	0.0764305	0.133859	0	0.0413444	0.00438463	0.0444589	0.112657	0.0682516	0.111108
ENSMUSG00000001270	Ckb	NRE	1.06474	34.7104	10.6713	31.5593	15.4772	38.687	19.3693	0.954794	30.1087	8.94612	27.3071	12.6328	32.7639	16.1384
ENSMUSG00000001280	Sp1	NRE	15.7715	11.502	13.2496	9.11378	9.23113	8.26905	9.14307	18.4806	12.7239	14.2615	10.3481	12.1612	10.7258	11.9852
ENSMUSG00000001281	Itgb7	TRE	15.7038	0.898542	1.40831	0.953811	0.59419	0.831936	0.546634	13.8335	0.751154	1.19157	0.823316	0.497814	0.682908	0.466932
ENSMUSG00000001285	Myg1	NRE	13.1721	13.1282	13.7793	13.7939	16.7487	14.187	15.9317	13.6444	12.9046	13.0541	13.4838	15.8578	14.5175	15.6984
ENSMUSG00000001288	Rarg	NRE	16.0461	6.12256	15.0605	5.18316	5.63626	6.22109	5.89864	21.1711	7.21318	17.7511	6.23635	6.77529	7.97724	7.1447
ENSMUSG00000001289	Pfdn5	NRE	95.7651	81.5551	97.0833	76.4352	83.8027	71.1739	82.1562	187.392	153.107	175.345	145.79	157.677	131.001	156.807
ENSMUSG00000001300	Efnb2	TRE+NRE	29.7698	19.6927	20.5873	18.4886	16.1775	21.7478	18.5471	36.9171	25.742	26.313	23.0456	23.2009	31.7624	25.7801
ENSMUSG00000001305	Rrp15	NRE	14.5912	8.09043	7.57732	5.94164	5.97424	4.33651	4.01476	13.161	7.23686	6.44235	5.22995	4.94726	3.73082	3.48765
ENSMUSG00000001313	Rnd2	TRE	4.43774	2.74357	2.95488	2.80347	1.98969	2.78462	2.08153	4.13908	2.4123	2.52266	2.4748	1.71622	2.35209	1.7439
ENSMUSG00000001323	Srr	TRE+NRE	16.1868	7.80595	13.6477	8.1613	6.97368	6.84301	7.03766	13.0669	5.428	8.35923	5.94899	4.9844	6.18385	5.77125
ENSMUSG00000001333	Sync	TRE	0.850381	4.9945	9.01988	6.33118	7.32356	5.84688	7.83241	0.500998	4.18189	7.42831	5.26998	7.03889	5.38941	7.39864
ENSMUSG00000001334	Fndc5	TRE	0.497857	2.38529	0.433103	2.3917	0.407575	1.91804	0.588425	0.450222	2.27709	0.391298	2.28627	0.34602	1.72975	0.492088
ENSMUSG00000001348	Acp5	NRE	1.50811	7.70417	1.17834	8.50216	1.72061	8.72001	2.77325	1.63904	8.2075	1.23874	9.2484	1.75815	9.1052	2.80094
ENSMUSG00000001349	Cnn1	NRE	0.0779142	8.53396	0.081116	6.30555	0.0271692	4.45082	0.0234518	0.0660598	7.41913	0.0526969	5.60245	0.0186741	3.84066	0.0172413
ENSMUSG00000001366	Fbxo9	NRE	15.5964	9.50521	14.9829	10.9384	10.4728	12.7911	10.6311	19.0179	11.1309	16.6052	12.6786	11.4231	14.1107	11.6412
ENSMUSG00000001376	Ccdc132	NRE	6.36472	6.92804	5.60134	7.00195	6.5537	5.74255	5.90468	8.18804	9.05087	6.84902	9.37499	7.85554	7.23874	7.39341
ENSMUSG00000001379	Apbb3	NRE	8.56872	5.33285	9.41117	5.76009	4.72566	5.88726	4.56838	7.11017	4.32573	7.22562	4.74935	3.61596	4.63231	3.54646
ENSMUSG00000001380	Hars	NRE	41.525	36.2767	29.3822	38.5317	39.6317	35.3952	36.8852	34.4816	29.6946	22.88	31.1643	30.6997	28.2009	28.8518
ENSMUSG00000001383	Zmat2	NRE	31.7287	24.5127	23.6656	24.4859	22.9706	23.1297	22.6888	28.1918	21.5171	19.9631	21.4386	19.0898	19.5677	19.0245
ENSMUSG00000001403	Ube2c	NRE	7.16426	9.02803	3.54692	11.5844	9.38812	6.68371	7.37128	15.2977	18.3156	5.38188	23.6983	18.8225	13.1601	15.1526
ENSMUSG00000001415	Smg5	NRE	16.0464	14.1044	16.848	13.6251	15.8853	14.2784	15.1698	14.162	12.2546	14.0061	11.7224	13.2549	12.1131	12.6902
ENSMUSG00000001416	Cct3	NRE	131.889	100.811	79.9453	102.085	89.6032	81.6758	82.2574	142.956	105.247	81.1586	108.522	102.886	94.9718	96.8821
ENSMUSG00000001417	Rhbg	TRE	0.0868464	6.21133	2.96301	8.5224	3.43587	12.9106	4.25751	0.088135	5.81974	2.71958	8.12294	3.23816	11.7961	3.89456
ENSMUSG00000001418	0610031J06Rik	NRE	7.87382	10.1513	14.1226	11.5473	10.8412	13.974	12.629	39.6204	49.7153	60.4513	55.2887	51.8828	64.293	59.3476
ENSMUSG00000001419	Mef2d	NRE	11.7101	8.95853	13.9417	9.34343	10.6959	12.3667	11.787	14.0761	10.9543	15.9881	11.26	12.9482	15.3335	14.955
ENSMUSG00000001420	Tmem79	TRE	1.16427	2.99265	6.08814	3.27051	1.93166	4.59309	2.74285	1.0071	2.94419	5.98307	3.19592	1.77768	4.59883	2.53949
ENSMUSG00000001424	Snd1	NRE	52.1135	35.3439	30.5029	31.5966	36.9078	33.695	34.2291	67.1778	44.2708	36.7087	39.2746	44.3219	40.8563	41.3821
ENSMUSG00000001435	Col18a1	NRE	68.7206	15.1144	35.4195	9.7867	5.9412	8.81911	4.24287	77.5297	17.7816	37.2247	11.9388	7.4126	10.6027	5.33074
ENSMUSG00000001436	Slc19a1	NRE	1.62427	1.50601	1.19869	1.90584	0.882454	1.89738	0.835111	4.18093	3.25528	2.96381	4.23734	1.60097	3.61017	1.865
ENSMUSG00000001440	Kpnb1	NRE	64.3188	58.7477	48.6725	53.828	54.8231	41.236	47.2967	57.6663	51.9893	41.1828	47.0996	45.6604	34.7667	39.3834
ENSMUSG00000001441	Npepps	NRE	27.2393	21.3432	21.8651	22.9607	29.779	25.9791	31.2518	27.6242	21.9335	22.1432	23.4392	29.5527	25.7729	29.7432
ENSMUSG00000001444	Tbx21	TRE	0.929135	15.6196	1.454	19.5442	27.9333	24.9441	32.1418	0.855268	14.3952	1.32017	18.043	24.6191	22.0923	28.5125
ENSMUSG00000001445	Mrpl10	NRE	20.5136	15.8995	16.1068	16.636	18.3084	17.6305	17.9281	19.238	14.8696	14.5687	16.002	17.2065	16.5045	16.8582
ENSMUSG00000001467	Cyp51	NRE	11.0401	40.1407	9.66868	27.3375	17.1172	22.7319	17.4557	9.87201	36.5437	8.24054	24.294	14.2151	19.5953	14.7328
ENSMUSG00000001472	Tcf25	NRE	54.9561	47.8561	58.2781	50.9605	63.133	60.6599	64.3928	65.6179	58.5896	63.2337	60.4624	73.4561	71.9839	76.2031
ENSMUSG00000001473	Tubb6	NRE	121.563	45.7027	61.756	46.4604	28.1866	34.8939	19.6861	118.499	44.1475	57.2726	44.9237	26.4829	32.3063	18.0968
ENSMUSG00000001482	Def8	NRE	19.8784	6.36056	9.81284	6.56018	6.84092	8.59077	7.69726	25.575	7.80562	12.3555	8.10681	8.99909	10.9725	9.55637
ENSMUSG00000001493	Meox1	TRE	0.521216	4.01965	2.92645	5.28673	3.56143	6.16126	4.79192	0.532805	4.05747	2.85872	5.26356	3.35483	6.01857	4.59135
ENSMUSG00000001494	Sost	TRE	0.0210126	5.63067	0.263424	6.49077	0.43597	5.75619	0.732478	0.0223048	5.60737	0.249218	6.39295	0.403714	5.59505	0.690063
ENSMUSG00000001496	Nkx2-1	not detected	0.047931	0.863136	0.0973076	0.671044	0.177834	0.564422	0.138629	0.00378214	0.764042	0.0294182	0.588261	0.0468434	0.43122	0.00482094
ENSMUSG00000001497	Pax9	TRE	44.101	17.7046	23.0542	15.4576	16.6797	15.4248	17.3464	43.6085	17.3688	21.4794	15.0238	15.3853	14.4071	16.0241
ENSMUSG00000001504	Irx2	TRE	0	10.6237	21.3425	0	0	0	0	0.0375781	1.45694	3.62733	1.5986	0.192727	1.259	0.443651
ENSMUSG00000001506	Col1a1	NRE	0.679974	23.0428	0.800794	19.7149	0.333257	13.4697	0.45654	0.626311	21.7789	0.714527	18.7484	0.220249	12.1688	0.347295
ENSMUSG00000001507	Itga3	TRE	24.2282	34.5675	41.3161	38.1411	51.7254	43.9597	50.0561	23.9987	35.5107	38.6381	38.7438	51.8819	45.1346	50.3335
ENSMUSG00000001508	Sgca	TRE	0.00625533	1.02257	0.270626	1.96224	0.494422	1.5424	0.616155	0.0193282	1.40695	0.407647	2.67787	0.823485	2.41498	1.05283
ENSMUSG00000001510	Dlx3	not detected	0.9418	8.36562	0.862342	8.4281	3.65694	8.62255	4.13368	0.945955	8.31481	0.804124	8.29538	3.41187	8.28058	3.87251
ENSMUSG00000001517	Foxm1	TRE	11.2994	6.18697	4.13057	5.59821	5.26185	3.41691	3.81755	11.1546	6.09529	3.86792	5.52854	5.03724	3.17261	3.5536
ENSMUSG00000001518	Itfg2	NRE	5.6984	5.58447	6.72746	5.83745	6.80771	5.7975	6.63186	7.03639	6.83754	7.80395	6.97518	7.9032	6.74806	7.66319
ENSMUSG00000001520	Nrip2	TRE	4.40415	2.74319	1.33421	2.50632	0.79265	2.23423	0.769721	4.55411	2.68071	1.2329	2.42342	0.797216	2.12758	0.675253
ENSMUSG00000001521	Tulp3	NRE	81.2144	15.1376	25.1673	13.6857	15.8405	12.7343	15.2052	76.0542	14.0179	22.4759	12.6977	13.8919	11.3388	13.4432
ENSMUSG00000001524	Gtf2h4	NRE	14.6218	7.52831	6.6437	7.306	8.35907	6.92624	8.19794	13.7164	6.92285	5.40672	6.48023	6.94098	6.11708	6.89463
ENSMUSG00000001525	Tubb5	NRE	118.479	132.2	106.819	133.858	140.17	96.6113	111.91	129.707	143.838	114.374	144.626	144.226	100.55	115.303
ENSMUSG00000001542	Ell2	NRE	18.912	21.9907	10.6925	23.4246	33.0154	25.5573	36.5427	17.5018	20.16	9.30922	21.1689	28.7549	22.6367	32.0349
ENSMUSG00000001552	Jup	NRE	116.181	72.7444	97.0438	75.6184	62.4808	114.182	74.1387	110.33	68.5136	87.3876	70.2686	57.0916	105.418	67.5042
ENSMUSG00000001555	Fkbp10	TRE	19.5555	3.44531	10.5102	1.21161	0.564357	0.664622	0.279389	18.4925	3.14367	9.11799	1.05177	0.491427	0.59797	0.227645
ENSMUSG00000001558	Klhl10	TRE	0.195866	0.216309	0.207401	0.324202	0.284485	0.348369	0.353351	0.215706	0.258919	0.215128	0.340338	0.258165	0.354155	0.34326
ENSMUSG00000001566	Mnx1	not detected	0	0.324035	0.00929957	0.243264	0.00622965	0.246021	0.0302473	0	0.341398	0.0101858	0.243158	0.0060445	0.233447	0.0335674
ENSMUSG00000001569	Nom1	not present	8.52388	6.38469	6.9171	5.1656	5.5015	5.03461	4.84541	7.66452	5.64738	5.86057	4.54763	4.6753	4.29443	4.0775
ENSMUSG00000001576	Ergic1	NRE	27.9236	14.7298	20.7258	11.6935	12.2475	8.81503	9.45966	27.678	14.505	19.5892	12.4061	12.9171	9.66674	9.42874
ENSMUSG00000001583	Tnk1	NRE	5.38493	7.81441	12.6852	8.1334	10.1071	9.42236	10.0267	2.78466	7.29953	9.13968	8.09651	10.4837	9.45237	10.0718
ENSMUSG00000001588	Acap1	TRE+NRE	5.51518	2.05933	0.628676	2.8293	0.88032	1.72129	0.817918	4.75494	1.85885	0.455492	2.53262	0.702391	1.48513	0.676255
ENSMUSG00000001604	Tcea3	TRE	0.0574232	3.10762	1.1131	2.85463	0.118872	2.47172	0.146915	0.0633845	2.51767	0.84431	2.32877	0.106044	2.0015	0.130228
ENSMUSG00000001622	Csn3	TRE	0.0303557	1.57936	0.286184	2.70005	1.09773	2.10044	1.35896	0.0465002	3.40518	0.563833	6.10623	2.29186	4.55637	2.92594
ENSMUSG00000001627	Ifrd1	NRE	14.0739	26.3123	15.1456	22.7185	15.5404	15.99	16.0581	38.6885	66.7676	33.9037	55.9387	35.7345	37.2959	39.3568
ENSMUSG00000001630	Stk38l	TRE+NRE	8.32197	4.94348	10.9047	4.64362	4.45864	5.05668	4.52102	10.1486	6.02599	12.333	5.49833	5.44783	6.19913	5.15845
ENSMUSG00000001632	Brpf1	NRE	7.09404	6.95512	8.64236	6.79216	8.03251	7.49969	8.0162	7.17232	6.94426	8.18869	6.717	7.76339	7.3183	7.7142
ENSMUSG00000001642	Akr1b3	NRE	8.83814	14.1361	14.4032	12.3644	8.05966	8.11706	6.78173	2.28167	3.7542	3.40264	3.02259	2.03073	1.72131	1.6628
ENSMUSG00000001655	Hoxc13	not detected	0	0.630257	0.0823868	0.346955	0.0232378	0.210308	0.0338484	0	0.636246	0.0765022	0.352964	0.0229249	0.208012	0.0331261
ENSMUSG00000001656	Hoxc11	not present	0.0322207	3.55876	0.533299	8.53109	4.69022	9.5046	4.91864	0.0334012	3.55138	0.518264	8.53427	4.47142	9.28691	4.76411
ENSMUSG00000001657	Hoxc8	NRE	0.0306468	1.1529	0.167964	1.21739	0.17001	0.695122	0.174781	0.0144464	1.08771	0.130909	1.16764	0.119384	0.632207	0.118201
ENSMUSG00000001661	Hoxc6	NRE	0.0115673	0.991462	0.25164	1.63941	1.32828	1.95766	1.6203	0.0239085	1.81187	0.42055	2.99307	2.35097	3.60603	2.95374
ENSMUSG00000001663	Gstt1	NRE	2.99973	15.6204	6.27146	20.4024	8.14033	20.9033	11.6271	4.05265	20.6972	8.08126	27.5007	10.6973	27.0605	14.4994
ENSMUSG00000001665	Gstt3	NRE	16.6972	14.0269	10.3716	18.2983	13.3551	20.9531	14.8569	28.3683	23.2697	16.2225	32.5003	22.5532	37.0137	26.5292
ENSMUSG00000001666	Ddt	NRE	25.0762	38.5281	16.2929	42.3104	28.8055	42.7682	30.9748	34.7273	51.9889	20.3024	58.0245	35.7109	55.481	39.7312
ENSMUSG00000001670	Tat	TRE	0.0180507	1.93038	0.0576825	2.94951	0.0356683	1.72653	0.0418525	0.0425118	1.71865	0.0763356	2.76572	0.0589759	1.55005	0.0357907
ENSMUSG00000001672	Marveld3	TRE+NRE	0.149415	4.97613	4.44747	5.97009	5.64098	7.4199	6.29449	0.235911	7.38216	6.36851	8.72687	7.6711	10.6082	8.53216
ENSMUSG00000001674	Ddx18	NRE	24.2077	19.8924	18.8921	19.2443	20.1507	15.683	18.6948	26.1185	21.2537	18.7555	19.9294	20.2849	15.3738	18.6239
ENSMUSG00000001687	Ubl3	NRE	41.8052	26.2367	23.0784	28.2083	37.093	36.1881	41.4735	41.933	25.9271	22.7917	28.4213	37.4851	37.5011	41.9804
ENSMUSG00000001700	Gramd3	NRE	12.326	20.0382	20.6145	15.817	19.8413	16.9622	19.6313	13.1922	20.8401	20.847	16.0749	19.5847	17.2341	19.7707
ENSMUSG00000001707	Eef1e1	NRE	12.9773	12.9811	7.7863	14.0549	13.2857	10.1558	11.6907	11.5558	11.7558	6.62333	12.4208	11.0246	8.62017	10.0348
ENSMUSG00000001729	Akt1	NRE	75.6147	54.8193	67.6289	44.5345	47.0711	43.9739	42.8314	87.2254	61.636	72.6384	49.778	52.3763	49.5072	48.3081
ENSMUSG00000001739	Cldn15	TRE	0.125534	0.837832	0.129043	0.978427	0.202955	1.09465	0.321174	0.100274	0.820969	0.120983	0.938098	0.196816	1.0519	0.26428
ENSMUSG00000001741	Il16	TRE+NRE	1.9614	1.26235	0.479	1.27796	1.23951	1.19652	1.29537	1.76556	1.3045	0.449808	1.34419	1.18855	1.17848	1.19054
ENSMUSG00000001750	Tcirg1	TRE	27.8386	8.57403	24.5452	6.92112	8.05072	7.98399	7.49926	27.2847	8.25186	22.57	6.60776	7.32491	7.60486	7.03251
ENSMUSG00000001751	Naglu	NRE	1.61523	3.06262	3.75995	3.38669	3.18333	3.93322	3.86135	1.58682	2.89409	3.43314	3.16346	2.85186	3.59225	3.44362
ENSMUSG00000001755	Coasy	NRE	21.3732	10.476	11.2995	10.6963	13.1456	11.8543	12.7256	21.2386	10.2864	10.626	10.592	12.2917	11.2885	11.8303
ENSMUSG00000001761	Smo	NRE	30.112	11.4419	21.5855	6.17696	5.99135	4.03358	3.62255	27.525	10.2848	18.4486	5.53566	5.18372	3.43657	3.03852
ENSMUSG00000001763	Tspan33	TRE	0.185056	9.7606	0.974007	11.2269	16.8245	12.6655	18.1377	0.173301	8.78686	0.832808	9.95115	14.3524	10.9159	15.4753
ENSMUSG00000001767	Crnkl1	NRE	13.0681	14.0988	11.2461	13.0332	12.4161	11.4838	12.1177	11.4134	12.0912	9.18685	10.9689	9.7929	9.26664	9.73681
ENSMUSG00000001768	Rin2	NRE	18.9558	21.1369	27.4353	18.583	27.7241	22.8783	30.0337	20.2702	22.1446	27.7557	19.4343	27.7245	23.1889	29.9803
ENSMUSG00000001773	Folh1	TRE	0.00812654	0.902876	0.0799046	0.885258	0.0053527	0.502048	0.00519786	0.00802023	0.777755	0.0548235	0.72134	0.00484805	0.398134	0.00537413
ENSMUSG00000001774	Chordc1	NRE	26.3917	24.1431	20.9457	25.0512	24.6584	22.843	25.6073	23.0427	20.8538	17.4588	21.6144	19.977	18.894	20.7636
ENSMUSG00000001783	D10Wsu52e	TRE+NRE	91.4806	60.2627	48.3208	58.93	65.7778	54.9794	60.7169	80.4399	52.3101	40.8672	50.976	54.9371	45.8635	50.5369
ENSMUSG00000001785	Pwp1	NRE	16.1318	18.5378	14.3597	16.9353	16.6929	15.3027	15.9455	13.4035	15.1508	11.2681	13.8486	13.131	11.8771	12.7465
ENSMUSG00000001786	Fbxo7	NRE	10.1358	8.30494	5.31254	9.2448	14.0872	11.1453	14.8779	22.4136	19.7042	11.296	21.7063	31.9577	25.9457	33.8791
ENSMUSG00000001794	Capns1	NRE	179.343	81.9643	136.229	78.5234	73.3076	79.4856	73.7524	206.713	92.7703	145.755	88.731	80.1514	85.3217	83.2497
ENSMUSG00000001802	Lrp3	not detected	1.11254	0.550245	1.06266	0.486396	0.312416	0.500779	0.245781	1.25798	0.566261	1.13193	0.482413	0.199178	0.446211	0.153325
ENSMUSG00000001804	Dsg4	not present	0.290911	4.51395	1.75305	3.67801	8.69661	4.54844	8.40821	0.322859	4.73109	1.73444	3.80374	8.68936	4.59074	8.46399
ENSMUSG00000001815	Evx2	not detected	0.002415	0.128246	0.00237456	0.126666	0	0.0706716	0	0.00238606	0.142516	0.002623	0.132138	0	0.0726004	0
ENSMUSG00000001819	Hoxd13	TRE	0.00437092	0.440694	0.00143258	0.290976	0	0.0805353	0	0.00431374	0.434646	0	0.297134	0	0.0796661	0
ENSMUSG00000001823	Hoxd12	not detected	0	0.060846	0	0.0501575	0	0.0224568	0	0	0.0581522	0	0.0465751	0	0.0222161	0
ENSMUSG00000001827	Folr1	TRE	0.0145808	1.97916	0.520899	2.17009	0.236897	1.73572	0.534698	0.0349701	4.16148	1.10626	5.3434	0.598609	4.03922	1.12302
ENSMUSG00000001829	Clpb	TRE+NRE	4.3186	5.61882	4.87505	6.12702	6.19415	5.69917	5.63389	10.8163	13.1782	10.8971	14.4607	15.6701	13.8379	13.7632
ENSMUSG00000001833	Sept7	NRE	60.8968	34.2553	29.8481	31.5367	24.8942	22.6069	24.8545	79.7847	44.8711	37.1101	41.0072	29.3852	27.5872	29.9356
ENSMUSG00000001844	Zdhhc4	NRE	11.2908	9.95404	11.8283	9.33493	9.82697	9.02534	9.76675	15.0806	13.0388	15.2674	12.3611	12.4929	11.3697	12.3767
ENSMUSG00000001847	Rac1	NRE	124.777	85.9952	69.3025	85.4244	79.3119	73.2057	77.1699	123.331	83.5142	64.0578	81.9264	71.1729	67.2058	70.2186
ENSMUSG00000001855	Nup214	NRE	8.6251	7.8434	8.24406	7.21793	8.83198	7.09784	8.53716	10.4314	8.96133	9.26928	8.39523	9.44716	8.01402	9.54166
ENSMUSG00000001864	Aif1l	TRE+NRE	1.49971	48.3563	8.86185	51.91	77.7843	51.5667	77.5316	1.45306	45.9472	8.07465	48.8813	69.4135	47.1407	69.7895
ENSMUSG00000001865	Cpa3	TRE	0.0896942	0.526796	0.0220481	0.859466	0.0196929	0.27544	0	0.0914939	0.362903	0.021736	0.665952	0	0.191926	0
ENSMUSG00000001870	Ltbp1	TRE+NRE	1.79918	4.42265	2.80379	2.69152	0.911262	2.43557	0.81999	2.17752	5.30123	3.18107	3.12181	1.03476	2.70364	0.94013
ENSMUSG00000001891	Ugp2	TRE+NRE	27.7451	20.7958	18.513	19.2505	13.1264	15.55	14.6381	33.2666	24.6638	20.9339	22.4218	14.7012	17.7541	16.3982
ENSMUSG00000001901	Kcnh6	not present	2.80234	26.856	10.4122	32.3752	53.5427	42.3042	56.0775	3.11176	28.5288	10.7424	33.6712	52.9222	42.5906	54.9401
ENSMUSG00000001909	Trmt1	NRE	16.3482	10.8502	15.5734	9.31685	11.5012	8.62503	9.69314	24.3679	16.0696	22.6331	13.1885	15.5388	11.6004	13.5904
ENSMUSG00000001910	Nacc1	NRE	38.5395	24.311	28.6131	21.3964	27.1145	23.2714	25.0581	38.5519	23.9712	27.0925	21.0003	25.5277	22.0514	23.7177
ENSMUSG00000001911	Nfix	NRE	55.1433	12.9915	24.085	11.7635	12.4026	11.3927	10.0931	87.5371	20.5994	37.3083	19.0158	20.2752	18.2699	16.2241
ENSMUSG00000001918	Slc1a5	NRE	3.06406	7.46633	4.04472	7.01484	3.23114	4.72516	2.45408	3.59014	8.42594	4.28037	8.52221	3.59946	5.3068	2.81273
ENSMUSG00000001924	Uba1	NRE	118.702	136.45	134.247	138.202	147.562	140.415	144.323	102.802	116.552	110.085	117.087	121.356	116.87	119.35
ENSMUSG00000001930	Vwf	NRE	0.100953	4.45992	3.33784	4.36246	6.40938	5.72942	5.95551	0.145224	4.85806	3.61167	4.62339	6.69819	5.97467	6.37761
ENSMUSG00000001942	Siae	NRE	3.42693	4.88635	8.48292	6.44121	3.72731	5.66387	4.15332	3.19475	4.58109	7.53105	5.92886	3.26682	5.05465	3.61841
ENSMUSG00000001943	Vsig2	TRE	0.00927606	0.576586	0.383071	0.421034	0.122197	0.432311	0.18986	0.0138709	0.453467	0.31279	0.380586	0.130673	0.409243	0.139165
ENSMUSG00000001946	Esam	NRE	0.344676	2.15089	4.48201	3.58522	2.65622	2.85784	2.66206	0.500126	3.04547	6.42064	4.98087	3.49154	3.86704	3.56349
ENSMUSG00000001948	Spa17	TRE	9.68681	10.6421	14.8325	10.6054	6.24412	6.8498	6.42442	7.85508	8.51691	10.9055	8.10084	4.61143	5.23899	4.75647
ENSMUSG00000001962	Fam50a	NRE	42.9254	30.523	28.0246	26.7854	29.8811	29.3945	29.6877	34.313	23.65	20.7842	20.4335	21.7702	21.8704	22.0935
ENSMUSG00000001964	Emd	NRE	33.2239	37.0403	34.1654	39.0236	36.2892	35.0058	36.8476	32.1942	34.0742	30.9728	31.7528	31.2876	28.5629	31.6544
ENSMUSG00000001983	Taco1	not present	14.1881	7.42047	7.77004	6.58554	7.54653	6.59164	7.23789	12.7455	6.62177	6.61685	5.98681	6.53803	5.66758	6.47303
ENSMUSG00000001985	Grik3	TRE	0.0495223	1.56755	0.150889	1.64243	0.538108	1.27022	0.455678	0.0339581	1.69007	0.120274	1.79007	0.516664	1.32398	0.456163
ENSMUSG00000001986	Gria3	TRE	5.798	11.4731	2.6452	13.067	17.2743	12.6199	16.732	6.21569	13.9704	3.05512	14.5935	20.3289	14.4506	18.2562
ENSMUSG00000001988	Npas1	not detected	0.140139	1.72235	0.16331	1.88468	0.0957239	1.21511	0.106234	0.127584	1.49305	0.129012	1.59103	0.0711008	0.973699	0.0843162
ENSMUSG00000001995	Sipa1l2	NRE	30.0559	6.214	2.76464	6.80289	7.61236	7.59367	7.56121	27.9541	5.77864	2.43151	6.29002	6.69721	6.76325	6.76106
ENSMUSG00000001998	Ap4e1	NRE	5.28358	3.84945	4.04249	3.5092	3.83389	3.38104	3.85735	5.95174	4.22522	4.33623	3.86291	4.06826	3.5663	4.05699
ENSMUSG00000001999	Blvra	NRE	9.71502	8.72048	7.1227	9.64821	6.78446	8.07138	6.82945	12.3884	11.0569	8.63597	12.2397	8.74487	10.226	8.52025
ENSMUSG00000002006	Pdzd4	TRE	0.746314	1.6725	2.3251	1.4173	0.882312	1.39851	0.891761	0.720101	1.59892	2.19159	1.40536	0.807808	1.3254	0.805666
ENSMUSG00000002007	Srpk3	TRE	0.0273927	0.498741	0.37169	0.453127	0.079388	0.403774	0.0981165	0	0.363025	0.301048	0.326055	0.0488768	0.287676	0.0825704
ENSMUSG00000002010	Idh3g	NRE	67.5071	58.9772	67.6675	58.7891	61.5815	58.4256	57.4532	52.0481	44.719	49.3935	44.3128	44.4809	42.8407	40.8752
ENSMUSG00000002012	Pnck	TRE	1.21295	0.882011	0.579281	0.831162	0.342399	0.688621	0.317717	1.31522	0.896287	0.576592	0.842909	0.32448	0.620801	0.301005
ENSMUSG00000002014	Ssr4	NRE	48.419	116.728	70.248	106.875	94.2767	104.693	106.065	38.1301	90.377	52.6692	81.946	68.806	79.0704	77.2149
ENSMUSG00000002015	Bcap31	NRE	60.4616	54.8354	68.4659	55.4977	49.9517	53.1019	48.074	50.1877	45.2377	53.6388	45.6361	39.4241	41.927	37.8384
ENSMUSG00000002017	Fam98a	NRE	53.7564	30.8265	24.8011	28.2085	28.7108	26.4738	27.353	51.3617	29.0612	22.2848	26.2926	25.706	24.081	24.723
ENSMUSG00000002020	Ltbp2	TRE	1.62843	17.9207	32.2728	17.6655	26.3656	23.7861	29.2735	2.85045	32.5969	51.9519	33.7333	51.8625	47.9062	60.6569
ENSMUSG00000002028	Mll1	TRE+NRE	9.06623	8.05403	12.967	6.92502	12.0636	7.86966	10.4154	8.80508	7.80625	11.9284	6.61178	10.8673	7.28202	9.5728
ENSMUSG00000002031	Ift46	NRE	14.5662	15.7672	13.2016	15.2432	14.6059	15.3791	16.6837	50.4643	52.0887	41.8734	49.7056	46.6498	48.5883	53.2589
ENSMUSG00000002032	Tmem25	TRE+NRE	1.99337	1.90872	2.29997	2.38224	1.12007	2.58849	1.34871	2.08558	1.91399	2.24012	2.46033	1.14693	2.56738	1.29114
ENSMUSG00000002033	Cd3g	TRE	19.9343	6.54246	1.37694	7.24441	1.76093	3.95546	1.54713	18.6943	5.96822	1.26724	6.28235	1.58352	3.33275	1.08859
ENSMUSG00000002043	Trappc6a	NRE	16.1071	25.8438	16.5696	28.8973	36.3058	35.7221	37.8224	13.3536	21.9505	13.0843	24.7481	28.6769	28.6122	30.3319
ENSMUSG00000002052	Supt6h	NRE	34.8423	33.0616	28.0071	31.6663	39.3499	36.9132	39.2859	29.7636	27.7954	22.5934	26.6837	31.5452	30.3663	31.8424
ENSMUSG00000002055	Spag5	TRE+NRE	6.5587	9.37194	3.85176	10.6793	8.82761	7.35975	7.2507	5.39188	7.8361	3.05039	8.8393	6.93734	5.87173	5.80994
ENSMUSG00000002057	Foxn1	not detected	119.224	49.2396	21.629	54.0241	74.3592	58.4541	74.3606	115.201	46.6667	19.5732	50.4857	66.8156	53.3383	67.2724
ENSMUSG00000002058	Unc119	NRE	50.708	5.45099	11.6101	4.14643	3.72549	3.63394	2.9091	57.1138	6.07907	12.519	4.716	4.24182	3.88388	3.41285
ENSMUSG00000002059	Rab34	NRE	30.596	7.98877	16.3712	5.20162	4.63121	4.41109	4.15643	37.9494	10.106	18.9878	6.38706	5.32156	4.96139	4.41389
ENSMUSG00000002064	Sdf2	NRE	36.1281	36.4289	29.1272	34.0061	44.7854	45.0849	46.4571	34.3236	33.6638	25.7762	31.384	39.5519	41.1987	41.4264
ENSMUSG00000002068	Ccne1	TRE	2.95469	5.01037	3.0053	4.32557	3.87169	2.80635	2.47753	3.2983	4.74838	2.66904	3.80376	3.55417	2.61308	2.3636
ENSMUSG00000002076	Hsf2bp	TRE	0.0535776	1.2333	0.257622	1.17527	1.21446	1.2003	1.49878	0.0396182	1.96454	0.360042	1.83899	2.39659	1.90945	2.80939
ENSMUSG00000002083	Bbc3	NRE	5.21493	9.22438	5.01515	8.68598	11.6229	12.1038	12.874	5.58355	9.82595	4.98038	9.65895	12.5985	12.6733	13.449
ENSMUSG00000002100	Mybpc3	TRE	0.0416822	6.97197	0.0665993	8.26928	0.0480458	6.73698	0.0599863	0.0358573	5.6131	0.0601258	6.57023	0.038725	5.23109	0.0457908
ENSMUSG00000002102	Psmc3	NRE	127.703	71.3073	64.1946	67.3415	69.4078	68.1373	67.3866	128.506	70.6104	61.227	67.0065	65.674	66.1106	63.2322
ENSMUSG00000002103	Acp2	NRE	9.75091	10.02	10.1311	11.3433	10.5589	11.0921	11.1015	11.6933	12.0324	11.2068	12.5745	13.818	14.1685	15.0436
ENSMUSG00000002104	Rapsn	TRE	0.0466939	0.53543	0.413208	0.46425	0.202109	0.412099	0.127998	0.0242597	0.442381	0.320605	0.394716	0.149551	0.330475	0.130287
ENSMUSG00000002105	Slc39a13	NRE	6.86828	4.59256	8.20672	4.23095	4.2417	4.33117	4.65889	7.61076	5.89489	9.35895	4.76999	4.28514	4.56417	4.84573
ENSMUSG00000002107	Celf2	TRE+NRE	10.454	12.8502	17.6539	9.80415	11.6001	8.56508	10.9889	20.9226	27.6638	34.6184	19.7641	23.8757	18.4592	21.994
ENSMUSG00000002108	Nr1h3	TRE	1.0757	4.5283	2.88506	5.4607	2.69109	5.8185	3.15916	1.14758	4.63497	2.77185	5.66719	2.49385	5.87565	3.13412
ENSMUSG00000002109	Ddb2	NRE	9.81585	11.3776	11.1413	14.4491	13.1859	12.8544	15.1392	9.66923	11.4471	10.1093	13.9185	12.5857	11.8017	14.629
ENSMUSG00000002111	Sfpi1	TRE	0.108629	3.60327	0.524339	4.06399	0.188633	2.47246	0.214758	0.149978	5.90363	0.881427	6.46203	0.347042	3.98481	0.232406
ENSMUSG00000002129	Sf3a1	NRE	25.2824	20.0189	17.7833	18.4383	21.4696	18.3775	19.3131	22.1136	17.3471	14.85	15.9727	17.6788	15.2734	15.9594
ENSMUSG00000002147	Stat6	NRE	16.2896	29.6817	31.6389	34.2908	38.3912	38.5172	41.6192	14.1511	25.6733	26.2838	29.8799	31.0583	31.8901	33.7437
ENSMUSG00000002190	Clgn	TRE	0.00539279	0.430227	0.0265124	0.614657	0.00532809	0.257176	0	0.00549002	0.527584	0.0323932	0.675034	0.00698262	0.264672	0
ENSMUSG00000002204	Napsa	TRE+NRE	0.284422	26.9717	0.941793	18.7339	8.63976	16.6071	11.8345	0.232353	21.7904	0.721589	15.2275	6.758	12.9415	9.1768
ENSMUSG00000002205	Vrk3	NRE	12.0627	15.613	14.9879	17.5071	20.1356	18.7934	20.8866	13.5597	18.5079	16.6311	20.839	22.9933	21.3548	24.6886
ENSMUSG00000002210	1500002O20Rik	TRE	18.5986	11.2707	12.2123	11.483	12.8398	11.9943	12.8694	22.6785	13.4726	14.2841	14.4013	15.2918	14.6815	16.3893
ENSMUSG00000002221	Paxip1	NRE	6.51083	7.79491	7.81567	6.88633	6.59442	5.80465	5.97873	5.49653	6.47464	6.20363	5.63535	5.22243	4.64962	4.77847
ENSMUSG00000002222	Rmnd5a	NRE	25.0737	13.3602	16.7815	12.481	10.5007	11.263	10.3321	31.0308	16.1043	18.9617	14.9405	11.9385	13.096	11.5075
ENSMUSG00000002227	Mov10	TRE	17.4283	9.41307	21.0385	8.67939	7.29613	10.3164	8.83957	16.1455	8.55174	18.4137	7.83896	6.4608	8.91765	7.95381
ENSMUSG00000002228	Ppm1j	TRE	0.0378373	2.4445	0.80608	3.3394	1.9107	4.52472	2.61374	0.0336269	2.05692	0.648928	2.79414	1.51196	3.64204	2.13934
ENSMUSG00000002233	Rhoc	NRE	23.0564	31.1351	60.7299	38.4787	45.7388	65.9505	59.3813	24.799	33.8602	60.4734	40.9176	47.1052	69.3547	62.5761
ENSMUSG00000002240	4930432K09Rik	TRE	0	0.119278	0.0159749	0.122907	0	0.105655	0	0	0.112382	0.00789946	0.128532	0	0.0869938	0
ENSMUSG00000002249	Tead3	TRE	20.0636	14.3106	23.7068	9.85254	12.8353	13.8814	14.1859	20.9153	14.8546	23.829	10.391	12.516	13.806	14.2481
ENSMUSG00000002250	Ppard	TRE	8.67576	11.7511	11.1118	9.91245	10.6681	12.8672	12.4272	10.5004	13.741	11.8898	11.0846	11.3288	13.7624	13.1595
ENSMUSG00000002257	Def6	NRE	12.1637	9.27534	19.8616	10.3892	14.1526	15.9473	14.4444	11.7443	8.51966	17.2762	9.4521	11.4089	13.367	11.8822
ENSMUSG00000002265	Peg3	NRE	6.57715	6.5048	5.11861	3.44267	2.58547	2.59571	2.25526	6.57965	6.48126	4.87845	3.40137	2.55689	2.49051	2.13212
ENSMUSG00000002266	Zim1	TRE	0.0298077	0.285944	0.0439629	0.372813	0.00785336	0.161534	0.0076262	0.0289598	0.299706	0.0452059	0.410684	0.00872836	0.172343	0.0077222
ENSMUSG00000002274	Metrn	TRE	1.56665	5.41557	3.02873	3.35124	3.93817	2.51828	3.38374	1.75402	5.99989	3.2324	3.84102	4.43108	2.66944	3.41523
ENSMUSG00000002279	Lmf1	NRE	2.00799	2.83799	3.64518	3.61259	4.23913	3.88188	4.5008	6.40631	8.79818	10.933	11.0191	12.3855	11.7292	13.407
ENSMUSG00000002280	Narfl	NRE	9.62718	10.6421	12.1348	9.44972	9.68333	9.883	9.85125	8.62956	9.1376	9.3264	8.62265	8.64157	9.03286	8.93746
ENSMUSG00000002289	Angptl4	NRE	2.50262	1.29795	4.22586	0.641825	0.215416	0.331349	0.177352	2.25417	1.17266	3.64266	0.575314	0.188791	0.304809	0.160001
ENSMUSG00000002297	Dbf4	NRE	5.87659	8.09081	3.14965	8.28189	6.0679	4.55733	5.34901	6.47948	8.86688	3.42363	8.7653	6.68596	4.91792	5.60433
ENSMUSG00000002307	Daxx	NRE	19.5021	12.1544	12.2811	10.6138	12.3015	12.2304	12.6508	21.6144	13.3526	12.8847	12.0618	13.2375	13.089	14.0784
ENSMUSG00000002308	Cd320	TRE	7.62181	4.15271	2.97823	3.6127	3.85399	3.5313	3.85173	12.6343	7.1497	4.79112	6.0527	5.81186	5.66281	5.87507
ENSMUSG00000002319	Ipo4	NRE	41.1432	17.0018	20.6822	16.7647	16.5832	13.8855	13.3167	33.4932	13.6605	15.7853	13.3611	12.3362	10.6064	10.0965
ENSMUSG00000002320	Tm9sf1	NRE	19.0483	22.8166	22.8632	22.7996	23.5765	25.0045	23.9105	26.3726	31.7514	29.1802	30.7085	30.5584	32.4782	30.019
ENSMUSG00000002324	Rec8	TRE	0.80006	2.51973	1.82903	2.76679	1.99007	3.24772	2.75254	0.574979	2.00028	1.31627	2.02141	1.41589	2.33778	1.94097
ENSMUSG00000002325	Irf9	NRE	41.7296	23.2721	51.5846	16.3272	11.9558	14.937	10.957	46.7918	25.6692	54.5477	17.5685	11.9608	15.3094	11.1254
ENSMUSG00000002326	Gmpr2	NRE	24.4104	14.2281	16.3527	15.3313	17.8597	13.44	15.656	19.9573	11.3967	12.7474	12.197	13.2773	10.4506	11.8964
ENSMUSG00000002329	Mdp1	NRE	14.9195	20.6766	20.0085	24.2065	25.7817	24.1886	27.3505	13.0103	17.3067	16.6493	20.6231	20.7463	19.7473	22.1069
ENSMUSG00000002332	Dhrs1	NRE	37.0547	22.5007	24.9527	20.8918	25.2016	24.6901	25.9221	31.3199	18.8464	19.899	17.4938	19.6178	19.8108	20.3568
ENSMUSG00000002341	Ncan	TRE	0.0637866	1.59391	0.286393	1.75176	0.187083	1.01906	0.196446	0.0372282	1.50685	0.230599	1.61625	0.146229	0.919713	0.14363
ENSMUSG00000002342	Tmem161a	NRE	7.27129	5.97364	8.3093	5.12885	6.53505	6.63563	6.61283	8.14823	6.85625	9.15405	5.95452	6.96669	7.13902	7.22486
ENSMUSG00000002343	Armc6	NRE	5.32141	3.85203	3.71977	3.8384	4.73623	4.61404	4.58779	5.25325	3.70338	3.28704	3.5469	4.56614	4.56498	4.08209
ENSMUSG00000002345	2310045N01Rik	NRE	23.1865	20.0212	25.5976	21.8938	28.9842	26.9078	30.4475	21.8136	18.9435	22.8249	21.8354	25.8249	24.2539	27.3652
ENSMUSG00000002346	Slc25a42	TRE	35.5205	15.338	10.6382	18.8076	43.6195	29.651	48.5103	34.3215	13.9988	9.49044	17.477	38.9575	26.6826	43.3354
ENSMUSG00000002365	Snx9	NRE	59.5798	24.3838	19.7948	23.8209	25.1907	26.2192	26.8557	50.5109	20.6192	15.8428	19.7594	20.0466	21.0451	21.6172
ENSMUSG00000002372	Ranbp3	NRE	27.9315	20.7546	25.772	20.1627	26.3795	23.2126	25.6836	23.3275	17.0914	20.3959	16.8069	20.7866	18.7811	20.3671
ENSMUSG00000002379	Ndufa11	NRE	71.3459	21.4351	26.6561	20.1454	25.4241	21.5852	23.6244	61.0779	18.0471	21.5984	16.9095	20.1666	17.4283	18.4214
ENSMUSG00000002384	Bmp8b	not detected	0.0518977	0.565593	0.0336676	0.632159	0.163071	0.34529	0.0988618	0.030614	0.444421	0.0217176	0.529835	0.117991	0.261023	0.0693895
ENSMUSG00000002393	Nr2f6	NRE	28.9682	23.3875	27.0601	21.7217	26.6845	31.4584	27.6064	29.6259	22.6873	25.0121	21.085	26.6611	31.3964	26.2653
ENSMUSG00000002395	Use1	NRE	85.2085	55.5958	63.7325	59.2493	99.0647	78.8277	104.561	83.3121	54.2247	58.8166	57.1469	91.7562	72.1991	98.8827
ENSMUSG00000002396	Ocel1	TRE	6.08637	5.89927	7.49965	5.68486	7.14034	8.11455	7.47305	3.11634	5.30725	7.15689	5.7912	7.11919	7.36923	7.80778
ENSMUSG00000002409	Dyrk1b	TRE	10.7785	5.90119	9.55266	6.23505	8.67107	8.24057	9.42223	11.2753	6.04481	9.40348	6.44309	8.78394	8.34972	9.39272
ENSMUSG00000002413	Braf	TRE+NRE	5.99341	7.4092	7.88825	7.77187	9.20807	8.25087	9.23357	7.18575	10.1227	8.70774	10.8504	11.6817	10.6236	11.1924
ENSMUSG00000002416	Ndufb2	NRE	6.84797	7.66987	6.30035	7.64981	8.75588	7.93621	9.42501	42.0033	49.046	34.954	49.3574	52.3375	50.6035	58.5649
ENSMUSG00000002428	Hltf	NRE	5.50206	9.58385	8.61023	10.8364	8.53495	8.04292	8.44217	4.89937	8.42351	7.15009	9.40881	6.91823	6.71016	6.99166
ENSMUSG00000002455	Prpf6	NRE	34.3483	33.113	28.5527	32.5346	39.6825	36.987	41.452	29.5696	27.9418	23.1232	27.193	31.4736	29.9053	32.8699
ENSMUSG00000002458	Rgs19	NRE	8.64689	11.9806	11.4109	13.9445	12.5199	11.2261	12.0864	18.4323	24.6103	24.2215	28.775	27.3127	23.5742	25.2721
ENSMUSG00000002459	Rgs20	TRE	0.216745	3.50759	2.15167	6.95997	13.507	8.13615	13.6569	0.235038	5.07416	2.88687	10.2451	19.3318	11.9925	19.5982
ENSMUSG00000002475	Abhd3	NRE	2.93728	2.12258	2.22998	2.13135	1.24607	2.25126	1.50723	2.75233	1.90353	1.86095	1.82743	1.08523	1.83766	1.33194
ENSMUSG00000002477	Snrpd1	NRE	70.6547	60.5945	45.8086	54.002	40.1069	30.7494	31.5323	59.815	51.0878	36.8572	45.0951	32.1995	24.7868	24.9242
ENSMUSG00000002486	Tchp	TRE	6.65292	5.27184	6.57473	4.84775	4.505	5.317	4.28146	7.27374	5.96578	6.47081	5.17753	4.84776	5.77972	5.00479
ENSMUSG00000002489	Tiam1	NRE	20.0339	27.9958	44.8853	19.4936	19.8347	22.5713	18.7587	23.043	30.9828	47.4009	21.654	19.1856	22.6765	18.3772
ENSMUSG00000002496	Tsc2	NRE	20.7775	16.8829	24.3704	14.7744	19.7598	16.8965	19.7343	17.6862	14.505	19.7621	12.4395	16.0701	13.8998	15.9872
ENSMUSG00000002500	Rpl3l	TRE	0.0544351	0.299729	0.0200713	0.404931	0.0567699	0.363826	0.0435219	0.0628925	0.315067	0.0152471	0.392093	0.0492094	0.330852	0.0412434
ENSMUSG00000002504	Slc9a3r2	TRE+NRE	3.01499	2.4194	2.35458	2.25049	1.53296	2.63714	1.4271	3.07822	2.48413	2.29857	2.37712	1.48335	2.6308	1.46299
ENSMUSG00000002524	Puf60	NRE	82.9698	62.4365	81.0391	68.6527	83.5989	75.5883	84.9347	74.1938	54.622	67.487	59.6898	70.2458	63.5881	70.9916
ENSMUSG00000002546	Golga2	NRE	24.1796	20.1769	20.9238	19.4117	24.56	24.3619	26.1442	26.4327	21.661	21.5657	20.0587	24.3822	24.5854	25.6094
ENSMUSG00000002550	Uck1	NRE	10.2352	8.51161	11.8635	8.97049	9.09812	9.29439	9.08266	11.8543	9.46427	13.5816	10.0773	10.2113	10.4282	9.9609
ENSMUSG00000002565	Scin	TRE	5.61772	20.1053	12.6984	30.1186	27.4766	29.8199	28.5519	5.92537	20.9155	12.2408	31.64	26.9055	29.8813	28.5394
ENSMUSG00000002578	Ikzf4	TRE	1.98062	1.1398	1.32416	1.08764	0.931809	1.07835	0.85469	2.40963	1.34413	1.56239	1.25265	1.02612	1.19086	0.915514
ENSMUSG00000002580	1810046J19Rik	NRE	48.0321	52.1088	50.1849	62.0763	66.1645	72.3725	70.5884	43.4375	46.56	43.7246	56.1372	56.0453	61.9821	60.9902
ENSMUSG00000002588	Pon1	TRE	0.0215195	0.308951	0.0211591	0.549876	0.0283484	0.178815	0.0183523	0.0405996	0.250944	0.0135856	0.467084	0.0241862	0.157257	0.00893688
ENSMUSG00000002602	Axl	NRE	5.45564	48.5347	39.4834	48.5082	74.6965	51.1465	72.7076	5.1483	46.0965	35.1437	44.65	69.117	48.3882	67.3052
ENSMUSG00000002603	Tgfb1	TRE+NRE	11.4867	11.4883	7.17796	12.7185	16.4334	12.2875	16.1495	10.248	10.1055	6.09926	11.0247	13.5837	10.4304	13.6441
ENSMUSG00000002608	Ccdc97	NRE	13.1367	9.76527	11.1957	10.0334	12.7598	12.888	13.5538	12.7535	9.30796	10.3101	9.62898	11.7278	11.9991	12.3607
ENSMUSG00000002617	Zfp40	NRE	3.14118	1.27759	1.76094	1.36482	1.08121	0.978398	1.10757	3.91249	1.56364	2.06363	1.64728	1.23768	1.17339	1.35381
ENSMUSG00000002625	Akap8l	NRE	29.2807	15.7449	34.2512	16.3915	22.4208	20.6315	22.0315	24.323	12.9368	26.9433	13.2362	17.2841	16.5587	17.0734
ENSMUSG00000002633	Shh	TRE+NRE	0.0120947	1.23917	0.186311	1.31346	0.0955969	1.18852	0.128933	0.0127383	1.22154	0.171635	1.26026	0.0826958	1.10149	0.126352
ENSMUSG00000002635	Pdcd2l	NRE	11.3223	10.4514	9.20448	10.9046	13.3807	11.1089	12.8328	10.353	9.26194	7.62873	9.557	11.8293	9.69584	11.0227
ENSMUSG00000002658	Gtf2f1	NRE	37.2013	50.828	40.7112	44.4646	46.453	49.7917	47.2681	30.7447	41.4485	31.8784	36.1575	36.2569	39.1758	36.814
ENSMUSG00000002660	Clpp	NRE	34.9598	14.9471	20.0888	15.9623	19.8524	18.0751	19.9798	30.8075	12.6218	16.6551	13.688	16.2139	15.0873	16.4899
ENSMUSG00000002661	Alkbh7	NRE	13.3748	6.81717	8.92168	7.69015	9.50032	9.52782	10.5219	12.5405	6.17074	7.61224	6.81244	8.09526	8.3722	9.00381
ENSMUSG00000002664	Pspn	not detected	0.526622	0.627561	1.28325	0.762124	0.693739	0.59559	0.790832	0.443006	0.473614	1.04058	0.683175	0.535615	0.466545	0.573577
ENSMUSG00000002668	Dennd1c	TRE	1.45137	3.01005	0.808814	3.13202	5.77555	3.72025	6.39632	1.12134	2.24337	0.552682	2.36656	4.16176	2.60741	4.38498
ENSMUSG00000002679	Med6	NRE	13.9415	11.8387	12.9607	10.549	9.46799	8.21734	8.81257	13.4598	11.4902	11.6918	10.0184	8.74449	7.66307	8.00131
ENSMUSG00000002688	Prkd1	NRE	5.9206	5.51713	3.30476	6.19492	6.27814	5.11241	6.55956	5.19026	4.82299	2.76914	5.24301	5.19211	4.35577	5.45916
ENSMUSG00000002699	Lcp2	TRE	2.55984	2.04053	0.498983	2.61328	0.669223	1.92031	0.90715	2.76989	2.07846	0.470706	2.56559	0.655628	1.8929	0.87353
ENSMUSG00000002718	Cse1l	NRE	28.6393	30.2299	26.1081	28.7938	20.6112	16.9481	17.9025	26.8401	27.5673	23.4996	26.3126	17.47	14.6256	15.5456
ENSMUSG00000002728	Naa20	NRE	22.5272	14.8637	15.2688	13.1315	10.8267	11.6093	11.4113	56.3053	36.6167	35.9527	31.837	25.3067	27.6106	26.7949
ENSMUSG00000002731	Prkra	NRE	13.1527	8.11588	12.7275	7.60313	6.29814	5.53891	6.14177	11.7816	7.14731	10.4722	6.52215	5.07843	4.58208	4.94267
ENSMUSG00000002732	Fkbp7	NRE	5.84295	1.90239	4.19405	1.50201	1.06397	0.6155	0.871754	5.32882	1.70424	3.65978	1.31599	0.876765	0.567872	0.664631
ENSMUSG00000002733	Plekha3	TRE+NRE	15.4485	13.7974	15.2151	15.431	16.3846	13.3551	18.0419	13.4878	11.9276	12.7491	13.2233	13.1711	10.913	14.7885
ENSMUSG00000002741	Ykt6	NRE	76.4002	35.8179	33.0553	31.6064	29.3284	35.2308	29.0182	72.8963	33.6561	29.6826	29.5168	26.2941	32.1489	26.4835
ENSMUSG00000002748	Baz1b	NRE	21.7651	22.3406	24.7451	18.0643	23.0781	18.4759	21.2273	20.5078	20.7533	22.0347	16.6528	20.0401	16.5357	18.7542
ENSMUSG00000002763	Pex6	TRE+NRE	20.5122	13.1834	20.6389	13.7828	18.4075	17.92	19.4109	17.7723	11.1012	16.8313	11.6347	15.0117	14.8504	15.91
ENSMUSG00000002767	Mrpl2	NRE	25.9824	22.1276	22.314	21.1713	22.9056	22.9705	22.5774	21.7067	18.265	17.8483	16.985	17.7543	18.6569	17.803
ENSMUSG00000002768	Mea1	TRE+NRE	34.1998	37.5118	37.0953	40.5295	43.6741	45.0911	44.7743	29.0193	32.6064	30.8212	35.0852	36.4021	38.4086	37.6198
ENSMUSG00000002769	Gnmt	TRE	3.22968	14.1136	0.690797	14.8497	9.89052	15.5475	11.8848	2.7579	11.4767	0.586491	11.9678	7.82071	12.4717	9.44816
ENSMUSG00000002771	Grin2d	TRE	0.154701	3.728	1.41658	3.60928	10.8281	5.76289	11.8284	0.24935	3.80405	1.36772	3.68214	10.6009	5.77768	11.4715
ENSMUSG00000002778	Kdelr1	NRE	41.6449	43.6857	48.3448	40.4456	40.5286	40.0517	41.4733	56.0008	57.5379	61.4752	53.9707	53.9055	52.3518	54.9255
ENSMUSG00000002781	Tmem143	TRE	4.81209	3.4214	3.68828	3.74192	3.64221	3.87326	3.84831	7.11354	4.41274	4.77724	4.84467	4.31233	5.20007	5.58151
ENSMUSG00000002797	Ggct	TRE+NRE	1.88831	0.735075	0.840766	0.688326	0.429634	0.513884	0.371629	1.74142	0.668369	0.743906	0.618779	0.388712	0.475883	0.329221
ENSMUSG00000002799	Jag2	TRE	91.8719	12.2878	41.6353	5.67056	9.43027	4.41713	5.19689	78.0943	10.3793	33.2119	4.65982	7.48246	3.60584	4.09217
ENSMUSG00000002803	Btbd6	NRE	6.24775	3.00191	6.43444	2.84682	2.71836	2.84495	2.55993	6.43771	3.10545	6.15055	2.87359	2.644	2.73733	2.45278
ENSMUSG00000002804	Nudt14	NRE	31.0398	30.0626	31.4082	30.977	31.4787	30.4233	33.0718	28.3329	26.4059	26.4622	27.1339	27.0639	26.177	27.7219
ENSMUSG00000002808	Epdr1	NRE	9.48841	2.87188	4.29802	2.14258	0.934761	0.936693	0.64006	9.49248	2.85589	4.10377	2.12884	0.913864	0.90652	0.598396
ENSMUSG00000002812	Flii	NRE	28.2231	26.4651	36.2402	28.2408	36.6617	33.9675	37.8718	23.1948	21.4987	28.0543	22.7537	28.4709	27.0029	29.5959
ENSMUSG00000002814	Top3a	NRE	4.0186	4.06507	4.47292	3.82987	3.666	3.80387	3.42552	4.30687	4.14979	4.40876	3.90539	3.47776	3.78527	3.39569
ENSMUSG00000002820	Atg4d	NRE	10.4515	15.4987	13.9386	17.1979	21.5159	21.6463	24.6963	5.87777	11.5009	8.76204	12.8692	15.3685	15.8326	18.2416
ENSMUSG00000002825	Qtrt1	NRE	6.08887	4.26882	7.22474	3.61853	4.6609	4.18256	4.58924	5.01878	3.42992	5.27491	2.74309	3.49585	3.20015	3.32772
ENSMUSG00000002831	Plin4	NRE	0.158882	0.352123	0.0746339	0.416095	0.0745285	0.457843	0.100116	0.113574	0.244612	0.0524852	0.32319	0.0560378	0.333359	0.0684787
ENSMUSG00000002833	Hdgfrp2	TRE	36.5493	23.5305	31.3529	21.2872	25.5682	22.7948	24.0653	31.3378	19.8402	24.8489	17.7167	20.8507	18.5032	19.4701
ENSMUSG00000002835	Chaf1a	not present	7.38416	8.89138	6.41251	6.75712	6.90251	4.52689	4.8673	6.15506	7.39677	5.02086	5.50887	5.37273	3.63271	3.8149
ENSMUSG00000002844	Adprh	NRE	45.0368	33.2469	31.4812	33.8157	37.0025	33.5722	37.5021	44.1161	31.8863	29.1894	32.2389	34.2572	31.2803	34.5427
ENSMUSG00000002845	Tmem39a	NRE	12.363	13.3213	9.14472	13.8178	13.0456	14.912	14.1199	28.9147	31.2368	20.5757	31.7964	29.7601	35.4886	32.7178
ENSMUSG00000002846	4930455C21Rik	NRE	11.1094	12.5289	11.0569	13.0774	12.219	13.2154	12.9627	9.35236	10.3534	8.75342	10.7747	9.45803	10.6695	10.1487
ENSMUSG00000002847	Pla1a	TRE	0.533844	29.49	2.4243	43.9596	96.7298	55.5934	97.5857	0.431487	25.0696	1.98551	37.3578	78.8367	45.9366	80.9042
ENSMUSG00000002870	Mcm2	NRE	13.2426	14.2143	13.689	10.4044	11.8407	6.53417	7.78217	11.7882	12.5809	11.6806	9.15873	9.89702	5.57811	6.4962
ENSMUSG00000002871	Tpra1	NRE	9.45692	5.79618	12.4174	6.36635	7.57483	8.04097	8.2863	10.1108	5.52301	12.2207	7.10461	8.03495	8.71312	8.65598
ENSMUSG00000002881	Nab1	TRE+NRE	16.3919	12.5411	12.4205	11.7547	8.03036	9.69522	8.18482	16.5095	12.57	12.5922	12.2975	9.64563	11.2872	9.9668
ENSMUSG00000002885	Cd97	NRE	3.24295	4.55116	2.89313	5.55216	3.93956	5.30194	3.91695	2.77686	3.72616	2.09088	4.54476	2.74329	4.21541	2.98262
ENSMUSG00000002897	Il17ra	TRE+NRE	11.589	10.0381	7.26861	10.8697	17.3118	12.7167	17.0462	10.9992	9.37391	6.43227	9.94734	15.1591	11.3554	15.1282
ENSMUSG00000002900	Lamb1	NRE	83.4258	21.9365	62.4953	8.74738	13.459	8.42507	11.0298	76.3752	19.1241	52.0089	7.52021	11.1287	7.01259	9.15469
ENSMUSG00000002908	Kcnn1	TRE	1.45065	3.21405	0.636844	3.76925	2.33081	5.25756	2.407	1.33058	2.94548	0.510871	3.40526	1.98734	4.74454	2.08679
ENSMUSG00000002910	Arrdc2	TRE	3.13148	10.3272	8.27034	13.2312	22.1116	20.5661	26.4555	3.1586	10.4324	7.84234	13.0481	20.6222	20.0352	24.8243
ENSMUSG00000002930	Ppp1r17	TRE	0.0460388	2.96502	0.0612189	4.15314	0.241278	1.80888	0.270402	0.0197304	2.74198	0.0301955	3.90805	0.208369	1.61243	0.211041
ENSMUSG00000002944	Cd36	NRE	0.602483	1.56907	0.812505	1.84213	0.112862	0.946543	0.157325	0.61561	1.49334	0.728626	1.76372	0.0961276	0.86217	0.147924
ENSMUSG00000002948	Map2k7	TRE+NRE	23.6285	12.1957	16.5224	11.7045	14.1606	13.0792	14.1523	29.4167	14.8719	19.1046	13.9779	16.2935	14.6573	16.3567
ENSMUSG00000002949	Timm44	NRE	31.9951	21.5501	22.5825	20.5544	25.1037	23.7295	26.6191	26.5038	17.767	17.8651	16.8341	19.6194	18.5176	20.8724
ENSMUSG00000002957	Ap2a2	NRE	35.2915	14.7951	20.9883	12.2825	11.7884	13.264	11.0134	30.5916	12.5497	17.0172	10.2106	9.44286	10.7343	8.75158
ENSMUSG00000002963	Pnkp	TRE+NRE	14.3836	12.5887	16.9963	14.1911	15.2753	15.9219	16.8664	15.2353	13.2583	17.5002	15.155	14.8389	15.9898	16.9858
ENSMUSG00000002968	Med25	NRE	27.9016	20.1704	22.8445	18.1313	20.6181	20.5596	21.6041	23.9523	17.41	18.7052	15.7178	17.4816	17.3329	18.2875
ENSMUSG00000002980	Bcam	TRE	37.1319	19.4481	48.552	10.792	4.02324	9.5421	4.55102	33.9008	17.6147	41.8641	9.79965	3.49304	8.30112	3.94789
ENSMUSG00000002981	Clptm1	NRE	17.1756	36.5271	30.4816	38.2611	42.6592	42.8505	43.6607	14.931	31.0997	24.9375	32.6827	35.3831	35.8302	36.5719
ENSMUSG00000002983	Relb	TRE	37.2666	78.076	47.5913	92.3094	152.84	108.347	159.485	45.6518	94.4326	55.1863	110.466	177.082	126.803	184.924
ENSMUSG00000002984	Tomm40	NRE	26.1161	23.8033	19.7372	22.2532	23.881	22.8832	20.0481	25.3975	22.8742	17.8262	21.1482	23.3991	21.4031	18.3384
ENSMUSG00000002985	Apoe	NRE	30.9245	70.1208	246.12	36.2097	27.4003	45.9952	25.9037	64.3684	143.259	469.814	72.5612	50.8993	92.8007	51.8172
ENSMUSG00000002992	Apoc2	TRE	0.38618	37.737	2.22591	72.874	21.7964	91.2166	38.5331	0.472058	42.2096	2.40865	75.2171	22.0521	97.7019	39.6222
ENSMUSG00000002996	Hbp1	NRE	20.6952	20.866	25.5532	20.3472	23.077	22.7374	24.5946	34.041	33.7208	41.2334	33.227	37.4611	38.708	40.9386
ENSMUSG00000002997	Prkar2b	NRE	0.549782	1.29015	1.48439	1.24396	0.125275	0.676399	0.112148	0.691436	1.5294	1.83333	1.47838	0.143084	0.707142	0.135365
ENSMUSG00000003031	Cdkn1b	NRE	22.7413	12.4817	14.405	12.6906	10.0769	9.81004	10.4046	32.8325	18.6807	18.9593	18.0328	14.4261	13.7033	14.8368
ENSMUSG00000003032	Klf4	NRE	6.56303	28.7772	44.9537	21.9559	17.8698	31.1675	22.4109	6.45451	28.6157	42.5595	21.5206	18.4862	32.2084	23.1159
ENSMUSG00000003033	Ap1m1	NRE	34.3118	18.4211	18.2881	20.5186	24.3832	20.9716	23.7246	34.1255	17.5979	15.7934	19.1906	21.7859	19.4439	20.767
ENSMUSG00000003037	Rab8a	NRE	16.5769	14.3129	15.2841	14.7864	14.7104	15.5394	14.9797	36.6864	30.8692	31.6716	31.2604	28.456	31.0554	29.5809
ENSMUSG00000003038	Hmgn2	NRE	87.8353	73.3537	46.6022	57.7015	40.2497	34.6803	33.4988	33.0146	28.2488	19.1504	23.3063	12.6502	10.7028	11.4964
ENSMUSG00000003039	Fam32a	NRE	43.4972	39.711	45.6881	42.9077	44.4481	44.893	44.0419	40.2819	36.5442	40.7872	39.4659	38.6629	39.6733	38.4043
ENSMUSG00000003051	Elf3	TRE	2.7024	36.3703	69.0644	50.3392	36.3145	68.4953	45.9058	2.45529	32.4896	58.9371	44.812	31.0241	59.4285	39.4187
ENSMUSG00000003053	Cyp2c29	TRE	0.570277	4.88795	0.885352	6.04078	2.45256	4.72184	2.13822	0.560964	4.94453	0.865092	6.17344	2.21548	4.57485	2.00687
ENSMUSG00000003062	Stard3nl	NRE	22.9748	14.8715	16.2855	18.6771	19.0664	16.2737	19.0668	19.4869	12.432	13.0432	15.5889	15.3271	13.3418	15.5252
ENSMUSG00000003068	Stk11	NRE	34.7611	32.4019	41.5747	32.0271	41.506	39.982	41.7176	45.865	42.0609	54.9026	43.7504	54.7431	54.7202	55.3668
ENSMUSG00000003070	Efna2	not detected	0.596889	1.61587	1.27695	1.33561	1.12713	1.09846	0.983767	0.565667	1.51005	1.15852	1.25455	1.01356	1.02084	0.911487
ENSMUSG00000003072	Atp5d	NRE	76.1095	76.0462	71.2477	79.4386	91.0347	98.5997	98.8485	104.498	104.792	95.3016	108.898	120.507	136.925	130.385
ENSMUSG00000003099	Ppp5c	NRE	37.1788	30.7072	29.037	32.0112	36.7914	32.6205	35.6267	32.4284	26.3216	24.0645	27.401	30.9355	27.906	30.0769
ENSMUSG00000003119	Cdk12	TRE+NRE	9.99137	7.90609	7.93688	8.04495	8.07727	7.80482	7.97461	12.5767	9.93755	9.51451	10.0683	9.48457	9.34431	9.55755
ENSMUSG00000003123	Lipe	TRE+NRE	0.506857	1.01581	1.47858	1.2042	0.778458	1.14817	0.789743	0.717402	1.59752	1.93285	1.77719	0.985381	1.6212	0.969347
ENSMUSG00000003131	Pafah1b2	NRE	35.5993	20.8066	18.6797	18.3257	16.9005	15.0031	15.3527	34.5381	19.9708	17.3186	17.5496	15.1983	13.6509	13.9648
ENSMUSG00000003134	Tbc1d8	NRE	9.72757	34.636	31.196	43.9602	97.7626	58.7194	101.122	8.05936	29.9048	25.8255	37.6716	80.5784	49.2663	84.1648
ENSMUSG00000003135	D1Bwg0212e	TRE+NRE	10.0845	8.49683	7.77486	8.50436	7.77201	7.495	7.92886	9.33633	7.75567	6.90926	7.74505	6.88994	6.66227	7.00403
ENSMUSG00000003153	Slc2a3	TRE+NRE	0.486882	4.52766	0.405454	4.70297	0.409048	2.40966	0.231974	0.55781	5.00382	0.520547	5.3489	0.507944	3.01901	0.297152
ENSMUSG00000003154	Foxj2	NRE	12.5867	10.4085	12.4331	10.5226	17.9439	13.6253	18.1831	12.0269	9.8413	11.176	9.855	16.0578	12.3247	16.3735
ENSMUSG00000003161	Sri	NRE	24.83	43.0565	31.8891	50.8503	49.9715	50.1143	56.4079	24.5314	42.2553	29.8053	49.3499	45.2941	45.76	51.4682
ENSMUSG00000003166	Dgcr2	TRE+NRE	22.3351	15.6218	21.3412	13.2878	13.3124	14.4211	11.9864	21.8915	15.184	19.794	12.7545	12.0714	13.3133	11.0879
ENSMUSG00000003178	Mical3	not present	15.5342	10.8133	14.145	10.2631	13.8847	12.1171	13.0783	14.1031	9.70204	12.0904	9.12548	11.7238	10.5266	11.3785
ENSMUSG00000003184	Irf3	TRE+NRE	22.8141	15.7973	26.4783	16.9729	20.2601	19.5654	20.4986	25.2725	17.1117	27.1537	18.386	21.0746	20.661	21.5109
ENSMUSG00000003190	Bcl2l12	TRE+NRE	6.4927	4.89906	5.90768	4.35788	4.54382	3.9648	4.77118	7.79513	6.43503	6.61982	4.80792	4.9985	4.57104	5.07808
ENSMUSG00000003198	Zfp959	NRE	2.74727	3.32607	2.97543	3.3836	2.43391	2.21186	2.59052	1.76922	2.20703	1.79873	2.07284	1.46503	1.34965	1.47582
ENSMUSG00000003199	Mpnd	NRE	25.2042	25.4103	31.3543	24.7923	29.4091	28.3325	28.4512	26.4804	26.4722	31.5515	25.0111	29.1809	28.3552	29.5011
ENSMUSG00000003200	Sh3gl1	NRE	39.7943	20.9549	24.1212	18.8159	18.3859	19.3662	17.9681	34.3097	18.0797	19.9189	15.9889	15.1501	15.9164	14.7346
ENSMUSG00000003206	Ebi3	TRE	0.417423	18.369	3.51148	31.774	23.6573	46.0764	30.2708	0.397481	17.2341	3.07964	29.4852	20.5829	41.4657	27.1322
ENSMUSG00000003208	Ccdc94	NRE	9.85958	9.9106	8.54678	10.0033	11.6252	11.0272	13.4175	8.32039	8.22376	6.8118	8.01665	9.2669	8.88631	10.4648
ENSMUSG00000003226	Ranbp2	NRE	24.2575	28.8848	17.6965	28.0493	36.2186	24.6342	35.5928	22.8433	27.0885	15.7721	26.0047	31.8995	22.2254	31.9737
ENSMUSG00000003227	Edar	not detected	7.93161	4.64148	10.1842	1.77582	1.81219	1.05759	0.877977	7.42295	4.31607	9.09343	1.66653	1.60007	0.929929	0.776727
ENSMUSG00000003228	Grk5	NRE	20.1046	30.4748	21.3172	28.5172	44.2192	34.655	45.0457	17.0041	25.326	16.9519	23.4022	34.6391	27.6343	35.9584
ENSMUSG00000003233	Dvl3	not detected	24.6901	13.669	19.0288	10.8748	15.5203	14.967	15.5434	22.0099	12.1102	16.3925	9.78119	13.3692	12.9727	13.4948
ENSMUSG00000003234	Abcf3	TRE+NRE	21.7165	14.4469	16.1036	13.9369	16.8788	16.3044	17.5498	17.6843	11.4504	12.2288	11.1806	12.8177	12.4883	13.3445
ENSMUSG00000003235	Eif2b5	NRE	29.0475	49.8317	20.6622	62.2566	88.0289	74.9136	89.6335	31.2066	52.8816	22.0764	68.2227	95.6507	84.5075	98.1036
ENSMUSG00000003269	Cyth2	NRE	14.8539	21.1672	19.9129	18.4261	19.8397	20.2988	21.5797	25.0797	35.928	32.1074	31.2166	32.9419	34.3932	35.6325
ENSMUSG00000003271	Sult2b1	TRE	0.146662	12.3919	5.41494	12.7282	8.71025	15.0162	11.5727	0.163485	15.0854	5.71929	15.8227	10.8905	17.187	14.279
ENSMUSG00000003273	Car11	TRE	0.0479312	1.36734	1.34653	1.43656	1.01026	1.67723	1.05988	0.0419082	1.08698	1.03594	1.13198	0.751336	1.3646	0.822533
ENSMUSG00000003279	Dlgap1	TRE	0.111124	0.333477	0.0760151	0.558873	0.791788	0.587483	0.929291	0.181935	0.510246	0.0966509	0.836029	1.19037	0.88943	1.53419
ENSMUSG00000003282	Plag1	not detected	1.75768	1.50766	1.96395	1.33759	1.25062	1.03855	1.38282	1.74133	1.49407	1.87409	1.31737	1.1551	0.99349	1.31772
ENSMUSG00000003283	Hck	TRE	0.181575	6.40876	69.6233	7.92759	2.47396	9.67684	4.14116	0.160861	5.47152	56.5902	6.67641	1.89869	7.83344	3.32623
ENSMUSG00000003299	Mrpl4	NRE	23.3698	21.5781	24.083	24.5687	30.7414	30.1258	32.0887	19.3228	17.1356	17.9763	19.6092	23.6861	23.1251	24.8087
ENSMUSG00000003308	Keap1	NRE	21.8881	14.7377	15.8517	13.7069	22.21	16.9496	22.2027	27.3856	18.0941	18.6749	16.877	25.983	20.0896	26.1177
ENSMUSG00000003309	Ap1m2	NRE	37.8044	52.7518	37.0854	55.4776	70.2061	64.4286	74.7136	33.242	45.6462	30.5569	47.3481	57.7097	54.0718	61.7993
ENSMUSG00000003316	Glg1	NRE	27.9422	26.7188	30.2284	23.3183	33.6088	27.1738	33.9511	30.6319	30.0708	31.3254	25.4657	36.0905	29.8967	36.5116
ENSMUSG00000003341	Atp8b3	TRE	0	0.241294	0.0226518	0.360171	0.0728357	0.227218	0.0677818	0	0.257383	0.0259959	0.338046	0.0604936	0.200423	0.0561784
ENSMUSG00000003344	Btbd2	NRE	16.5647	11.5608	18.9219	12.7881	16.103	14.1472	15.3361	20.9746	14.1748	22.0007	15.4757	19.336	17.724	18.9311
ENSMUSG00000003345	Csnk1g2	NRE	51.0665	34.2298	46.087	29.1764	31.7968	32.2976	32.1018	52.1794	34.0357	43.3322	28.7639	29.2783	30.5261	29.5197
ENSMUSG00000003346	Fam108a	NRE	18.4119	17.3751	19.2567	17.4512	20.0701	21.6091	21.6859	17.5065	16.1359	17.0972	16.2924	18.0203	19.501	19.5439
ENSMUSG00000003348	Mob3a	NRE	11.4594	46.4082	28.2507	47.1686	69.0587	48.2495	67.3646	11.1909	45.0161	26.321	45.6264	63.1736	45.0062	61.856
ENSMUSG00000003352	Cacnb3	NRE	8.0667	29.4161	24.5371	37.3913	36.5995	42.7988	38.3932	8.40528	30.1893	23.9567	38.3928	36.4671	42.9572	37.9703
ENSMUSG00000003354	Ccdc65	TRE	0.306357	1.78265	0.931574	1.79682	0.112104	1.04532	0.31207	0.361144	1.60763	0.805911	1.72663	0.185696	0.964102	0.350468
ENSMUSG00000003355	Fkbp11	NRE	0.46025	5.13019	0.248169	4.85197	0.254257	2.83211	0.303879	0.320991	3.92805	0.199821	3.80769	0.171045	2.16325	0.204728
ENSMUSG00000003360	Ddx23	not detected	24.8943	25.1155	25.8407	23.2558	27.6953	26.0428	26.6944	24.9906	23.9055	24.4146	21.1965	26.7058	24.5241	26.4371
ENSMUSG00000003363	Pld3	NRE	24.8256	21.2002	29.179	18.0047	20.9348	25.2686	23.2718	26.044	21.3293	27.4621	17.7614	18.305	22.1573	21.0028
ENSMUSG00000003378	Grik5	TRE	1.35804	3.61832	4.30356	4.00948	4.59921	4.74686	4.8661	1.20777	3.06172	3.48799	3.37292	3.73849	3.94727	3.95211
ENSMUSG00000003379	Cd79a	TRE	0.0446932	2.92754	0.168455	2.70479	0.407226	2.20403	0.457383	0.0463307	2.51063	0.129219	2.34079	0.315531	1.97219	0.373199
ENSMUSG00000003380	Rabac1	NRE	48.6834	73.4918	77.5648	75.5272	99.1153	92.8529	109.862	41.5054	61.5782	62.2107	62.9389	78.3238	73.8987	87.2309
ENSMUSG00000003382	Etv3	TRE+NRE	12.4646	27.5793	10.09	37.2911	36.8946	42.8653	41.5236	17.7736	38.8067	13.785	52.2535	49.2923	58.2734	55.7504
ENSMUSG00000003402	Prkcsh	NRE	45.0236	74.3509	57.976	74.286	85.5088	88.9633	92.0563	35.5171	57.7776	43.0975	57.8587	61.9993	65.6194	67.0913
ENSMUSG00000003410	Elavl3	TRE	0.0557757	1.5194	0.179615	1.54797	0.449123	1.33128	0.494156	0.0471062	1.47666	0.158566	1.48319	0.388706	1.24915	0.448594
ENSMUSG00000003411	Rab3b	TRE	0.0160928	2.60552	0.825978	2.30819	0.0529991	1.57676	0.144105	0.0529089	6.3239	2.10185	5.45769	0.105137	3.79057	0.297083
ENSMUSG00000003418	St8sia6	TRE	0.28448	1.26827	2.04208	1.48823	0.481552	1.52408	0.731603	0.283391	1.29285	1.94656	1.62743	0.473936	1.59843	0.752152
ENSMUSG00000003420	Fcgrt	NRE	13.3508	6.68108	12.4764	6.64497	4.99327	9.63772	7.42903	12.0649	5.92038	10.6346	5.95629	4.08178	8.15712	6.20727
ENSMUSG00000003421	Nosip	NRE	15.2282	16.1112	17.4237	16.277	19.3476	18.1482	19.3049	21.6422	22.6817	22.3402	21.5965	25.9638	24.1988	25.853
ENSMUSG00000003423	Pih1d1	NRE	23.1663	23.3467	22.6196	24.3908	29.4894	26.2065	28.1578	27.1685	26.7626	25.3323	28.8301	34.3308	29.1559	34.1824
ENSMUSG00000003429	Rps11	NRE	558.562	716.797	585.857	721.413	732.111	629.343	671.23	459.459	586.482	448.565	577.799	566.21	492.334	522.952
ENSMUSG00000003435	Supt5h	NRE	87.1363	72.8007	66.8649	72.9345	102.508	82.5146	101.58	70.1108	57.4486	50.5146	57.3543	77.7647	63.3048	77.0467
ENSMUSG00000003436	Dll3	TRE	0.204928	4.49862	6.30291	3.46583	4.48291	2.3856	2.87874	0.101901	4.68943	6.33167	3.54091	4.82714	2.39801	2.8538
ENSMUSG00000003437	Paf1	NRE	37.0887	43.9693	34.4272	42.771	53.7906	50.8512	56.0192	31.0001	36.43	27.0582	35.3577	42.7833	41.3381	45.0521
ENSMUSG00000003438	Timm50	NRE	19.5784	21.8295	21.1523	21.3229	21.1483	17.3066	18.8596	15.507	17.2692	15.8274	16.514	15.8399	13.1623	14.2139
ENSMUSG00000003444	Med29	NRE	12.2424	9.45436	9.19678	10.5538	9.78807	11.2211	9.55912	10.3613	7.79479	7.20592	8.58556	7.80973	9.21506	7.89417
ENSMUSG00000003452	Bicd1	TRE+NRE	2.4717	5.12128	2.4897	6.4533	10.003	8.24671	11.2342	7.05322	12.0561	4.7448	14.4697	25.8602	21.5278	28.3787
ENSMUSG00000003458	Ncstn	NRE	30.8699	41.3944	44.7707	36.4537	37.4946	39.015	39.7003	26.3285	34.624	35.9494	30.636	29.8295	31.5103	32.2504
ENSMUSG00000003464	Pex19	NRE	24.7915	19.4502	18.6363	17.5143	17.845	17.6011	18.128	33.0183	26.1202	24.0365	23.5366	23.2387	23.0965	23.6755
ENSMUSG00000003469	Phyhip	TRE	0.902551	3.00093	1.59519	2.98688	0.786092	2.51023	0.968505	1.1412	3.57741	1.54778	3.37428	0.85655	2.46446	0.985919
ENSMUSG00000003476	Crhr2	TRE	0.00355719	0.678998	0.0384739	0.929283	0	0.50506	0.00910094	0	0.783547	0.0427596	0.949142	0	0.550779	0.0115304
ENSMUSG00000003477	Inmt	NRE	32.2567	2.73238	0.128808	3.81159	0.331872	2.23899	0.528527	30.9655	2.53848	0.126422	3.4635	0.336255	2.04101	0.428327
ENSMUSG00000003484	Cyp4f18	TRE	0.241674	2.79845	0.89178	3.20731	0.800814	2.8594	0.867378	0.0617114	1.91269	0.406027	2.31086	0.301019	1.92632	0.463096
ENSMUSG00000003500	Impdh1	NRE	13.4161	4.22674	3.78307	3.50039	2.08258	2.53576	1.62762	13.5889	4.26768	3.63722	3.59382	2.3567	2.56433	1.78694
ENSMUSG00000003505	Psg18	TRE	0.00142652	1.38268	0.0311135	2.49031	0.00808733	1.35057	0.0436423	0	1.19968	0.0126247	2.50633	0	1.18106	0.0163998
ENSMUSG00000003518	Dusp3	TRE+NRE	1.66198	1.41288	1.04839	1.49275	0.896217	1.22109	0.963684	2.609	2.5316	1.74969	3.22568	1.37045	2.33891	2.12331
ENSMUSG00000003526	Prodh	TRE	1.37918	5.36372	3.74649	7.06828	6.82674	7.15271	6.64135	2.70896	8.89268	6.65428	11.6879	12.113	11.8884	11.8947
ENSMUSG00000003527	Dgcr14	TRE+NRE	8.4641	7.00208	7.44414	6.59764	7.82559	7.07484	7.8701	7.43277	6.15529	6.25401	5.88154	6.63608	5.97382	6.65025
ENSMUSG00000003528	Slc25a1	NRE	36.9183	23.0898	24.6336	22.308	20.4061	24.7455	21.1396	45.7218	27.4537	27.8358	27.0045	21.9637	26.8483	22.4533
ENSMUSG00000003531	Dgcr6	NRE	15.4502	7.71279	12.9995	6.95251	8.42991	7.79434	7.49589	25.6176	12.5983	20.3322	11.4146	12.8899	12.1093	11.6428
ENSMUSG00000003534	Ddr1	NRE	72.2092	20.4502	46.2664	13.1437	13.3691	16.3535	12.2177	94.7087	26.1966	55.9138	16.3426	15.8029	19.6469	14.4598
ENSMUSG00000003541	Ier3	NRE	78.4563	14.5031	17.5307	12.0406	6.4343	12.1893	8.43321	78.1396	14.6225	16.5052	11.8897	6.02845	11.7058	7.97379
ENSMUSG00000003545	Fosb	TRE	193.803	65.5963	88.9272	38.2734	42.8017	45.2847	47.5275	188.834	66.9177	83.508	37.7631	41.2707	43.279	45.0184
ENSMUSG00000003546	Klc4	NRE	10.3867	11.3618	13.8512	13.3174	18.2243	21.8285	21.4514	9.11	9.71182	11.2848	11.3326	15.1583	18.3967	17.9484
ENSMUSG00000003549	Ercc1	NRE	10.0026	8.79992	9.85145	8.89741	10.3386	9.04468	10.5354	12.0576	11.1231	10.8791	11.1802	12.1403	11.3324	11.8249
ENSMUSG00000003555	Cyp17a1	TRE	0.358777	3.70513	0.22342	6.49575	5.86061	7.69935	7.58811	0.319954	3.2957	0.202401	5.73725	4.91379	6.83609	6.28265
ENSMUSG00000003559	As3mt	NRE	26.4538	5.4059	14.5899	5.50157	7.2016	5.50861	6.7792	22.6072	4.50136	12.0807	4.73128	5.74566	4.44873	5.45367
ENSMUSG00000003573	Homer3	TRE	13.8117	7.85231	15.8572	6.01464	7.31395	6.9703	6.96852	9.23184	3.92226	11.6461	2.64373	3.2365	3.36484	2.97415
ENSMUSG00000003575	Crtc1	TRE+NRE	8.77712	4.52204	7.06222	4.10291	4.02018	4.32182	3.64494	8.28463	4.22601	6.37703	3.79971	3.56732	3.86742	3.24153
ENSMUSG00000003581	Rnf215	NRE	12.7236	9.58062	14.663	8.08457	11.9778	9.52204	11.9721	10.9803	8.10828	11.7804	6.7273	9.58129	7.87347	9.67313
ENSMUSG00000003585	Sec14l2	TRE	1.11376	6.01243	3.87751	5.38814	5.46124	6.48725	5.47213	0.956603	5.28832	3.28919	4.67987	4.48372	5.54713	4.52814
ENSMUSG00000003604	Aven	TRE	4.51853	5.5533	3.25004	6.48633	9.1805	6.22253	8.59246	10.5468	14.3177	9.58203	16.0868	16.6103	15.0005	16.7927
ENSMUSG00000003617	Cp	TRE+NRE	0.366252	2.54559	2.54526	3.48172	1.74814	2.61331	1.78964	0.591732	4.79898	4.63005	6.39419	2.80345	4.7268	2.83331
ENSMUSG00000003623	Crot	NRE	17.7321	14.9143	20.7655	16.9245	13.0802	17.8407	15.3432	15.2359	12.7516	16.7799	14.1549	10.1863	14.3546	12.1591
ENSMUSG00000003644	Rps6ka1	NRE	11.6732	9.85489	9.80264	11.5277	8.73094	13.3165	10.4359	12.4242	10.2524	9.71718	11.9722	8.75247	13.6195	10.5172
ENSMUSG00000003657	Calb2	TRE	0.130834	21.3511	0.269538	29.3467	0	21.311	0.00796986	0.106429	20.3176	0.226695	28.0232	0	20.2064	0.00954748
ENSMUSG00000003660	Snrnp200	NRE	37.6395	38.9793	38.2385	37.1731	50.8165	38.8611	48.1095	32.1059	32.9978	30.8719	31.3419	40.3477	31.6683	38.795
ENSMUSG00000003662	Ciao1	NRE	13.4436	10.8759	10.9003	11.4488	12.6883	11.4416	12.9715	23.2244	18.4349	17.1435	19.175	19.9809	19.4057	21.0502
ENSMUSG00000003665	Has1	TRE	0.0519282	2.21116	0.0204235	2.79695	0.0478849	2.17248	0.00664282	0.0466404	2.0191	0.0151008	2.58587	0.0404914	2.01428	0.00653249
ENSMUSG00000003680	Taf6l	NRE	4.74181	4.24615	3.79543	3.88417	4.81797	4.0193	4.23069	4.62717	4.27819	3.63755	3.8841	4.86784	4.07075	4.05646
ENSMUSG00000003721	Insig2	NRE	11.1551	19.8626	19.2203	20.5796	22.9014	23.9101	24.5114	13.9743	26.4938	25.2297	28.5022	32.7247	35.4657	38.2753
ENSMUSG00000003731	Kpna6	TRE+NRE	22.0769	10.8934	12.7965	10.8432	11.0191	10.1288	10.572	27.7458	13.0146	13.8016	12.2519	12.4805	11.787	12.8879
ENSMUSG00000003746	Man1a	NRE	7.29963	10.2566	29.5055	8.1556	8.66135	7.29905	8.48692	10.1906	14.3053	37.5178	11.531	12.366	11.0112	12.7348
ENSMUSG00000003752	Itpkc	NRE	4.85661	8.04549	11.4337	6.54048	7.29603	10.1435	8.42758	4.59598	7.62661	10.2604	6.1277	6.55826	9.2399	7.7245
ENSMUSG00000003762	Adck4	NRE	8.2613	8.68062	9.40588	8.98967	8.88497	10.1723	9.85482	7.68622	7.91335	8.25439	7.95993	7.61498	8.81948	8.43849
ENSMUSG00000003778	Brd8	TRE+NRE	18.9145	16.1712	17.4292	17.1205	17.6625	15.9876	16.4652	25.9269	22.0718	22.9406	22.8187	22.2884	20.456	20.5408
ENSMUSG00000003779	Kif20a	NRE	16.0997	19.7915	11.7773	18.2087	16.1021	10.8882	11.8703	11.92	14.9621	7.89346	13.5857	11.9249	7.58417	8.33223
ENSMUSG00000003808	Farsa	NRE	18.269	14.3063	13.2934	13.8331	17.2434	15.4563	16.7472	25.0924	19.3591	16.9275	18.8438	22.3783	20.4874	21.743
ENSMUSG00000003809	Gcdh	TRE	14.4423	11.2843	10.7794	12.3033	9.66747	11.9417	9.925	12.7445	9.92976	9.04778	10.6931	7.7199	9.92162	7.97416
ENSMUSG00000003810	Mast2	NRE	9.60931	9.45721	10.7123	10.1344	9.37865	11.1845	10.0822	9.56167	9.2971	10.0059	9.92803	8.64032	10.5605	9.42187
ENSMUSG00000003812	Dnase2a	TRE	3.52803	7.24606	11.5807	5.48641	6.19368	6.2795	6.64704	4.21368	9.34045	12.5737	6.7128	7.34413	7.45724	7.66428
ENSMUSG00000003813	Rad23a	NRE	26.8792	16.5192	18.1833	17.3727	20.2229	17.1973	20.3619	58.7944	34.1966	35.4538	36.4603	42.3892	35.3707	41.8326
ENSMUSG00000003814	Calr	NRE	307.094	796.27	373.604	832.534	794.629	802.667	805.052	265.023	677.394	308.232	706.76	649.174	666.381	659.948
ENSMUSG00000003824	Syce2	NRE	5.29593	6.00389	2.47368	5.87816	4.70695	5.12901	4.2123	7.63615	8.81864	3.49933	8.56974	6.48992	7.06217	5.82516
ENSMUSG00000003847	Nfat5	NRE	23.1139	12.9942	28.0326	10.4273	11.0984	10.9617	10.5436	30.3479	16.4792	35.2521	13.9076	15.5759	15.2054	14.8082
ENSMUSG00000003848	Nob1	NRE	20.1874	12.5972	13.9473	12.241	12.9346	10.8264	11.363	17.6725	11.0507	11.4762	10.5545	10.5233	9.03479	9.31665
ENSMUSG00000003849	Nqo1	TRE	238.857	18.2991	4.755	23.9661	27.7471	23.3364	31.1373	220.037	16.8096	4.0798	21.7606	23.7543	20.1446	26.5756
ENSMUSG00000003863	Ppfia3	NRE	0.0777629	3.0651	1.42586	2.63574	3.67843	4.59062	4.79771	0.0687707	2.95198	1.273	2.60249	3.46908	4.27592	4.50598
ENSMUSG00000003865	Gys1	TRE	13.1487	8.68268	11.9807	8.68488	14.1688	10.2949	15.4286	11.5876	7.6344	9.99537	7.579	11.7918	8.6905	12.8022
ENSMUSG00000003868	Ruvbl2	NRE	31.5551	26.966	24.4627	25.6845	27.2605	21.5691	23.4359	33.9008	30.0517	24.2906	28.2898	28.3506	22.9528	24.3405
ENSMUSG00000003872	Lin7b	TRE	0.14766	0.404713	0.522674	0.476599	0.505746	0.768189	0.887788	0.106415	0.277789	0.38299	0.392998	0.323633	0.569318	0.591552
ENSMUSG00000003873	Bax	NRE	32.794	52.3886	37.1621	59.9585	122.416	76.6038	126.019	41.2271	64.5084	43.4947	73.4358	142.923	91.1967	147.263
ENSMUSG00000003882	Il7r	TRE	0.178183	2.01107	1.06264	3.07589	2.72104	3.98336	3.22537	0.163343	1.90279	0.925856	2.88099	2.39629	3.72307	2.87022
ENSMUSG00000003923	Tfam	NRE	17.7461	11.7952	13.9279	7.67815	6.57005	5.57084	5.65864	50.2384	31.2905	34.5715	19.2965	14.3995	13.0427	13.1224
ENSMUSG00000003929	Zfp81	NRE	2.27191	1.40933	2.24239	1.33396	1.00302	0.88324	0.959019	3.9897	2.37825	3.73723	2.36941	1.76786	1.24646	1.63695
ENSMUSG00000003934	Efnb3	TRE	0.876286	2.61671	0.335258	3.19843	1.74278	3.09686	1.56151	0.867867	2.50101	0.298174	3.02465	1.62925	2.83109	1.46389
ENSMUSG00000003948	Mmd	NRE	2.97616	3.66683	7.91479	3.1731	1.90441	2.15483	1.39572	3.7508	4.64787	9.41444	3.86186	2.22308	2.53415	1.6318
ENSMUSG00000003949	Hlf	TRE+NRE	0.0401287	0.41245	0.087881	0.601618	0.27633	0.644488	0.347671	0.0612852	0.588703	0.0910655	0.634964	0.424964	0.976271	0.510165
ENSMUSG00000003955	Fam162a	NRE	73.3047	45.088	42.7691	50.5108	56.6028	46.3106	57.8734	61.7131	38.137	34.2816	42.2776	44.6972	37.5813	45.8588
ENSMUSG00000003970	Rpl8	NRE	610.563	583.294	530.146	528.892	613.579	496.648	562.974	540.385	510.146	443.983	461.797	505.357	415.742	458.428
ENSMUSG00000003974	Grm3	TRE	0	0.299803	0.0196788	0.275278	0.0699073	0.246498	0.0827553	0	0.360978	0.0278834	0.284259	0.0651142	0.279985	0.076831
ENSMUSG00000003992	Ssbp2	TRE+NRE	7.5672	3.18416	5.31271	2.35149	1.57531	1.82225	1.41396	13.5715	5.57121	8.09098	3.99582	2.23571	2.98507	1.91635
ENSMUSG00000004018	Fancl	NRE	4.59135	6.07042	4.70353	5.84695	6.87391	4.74684	6.16906	5.92109	6.62333	4.45526	6.34017	6.36924	4.61687	5.349
ENSMUSG00000004031	Fam5b	TRE	0.42893	6.80602	6.80264	5.52017	5.62953	4.53986	4.47767	0.422424	6.60591	6.21316	5.27828	5.14171	4.22959	4.15287
ENSMUSG00000004032	Gstm5	NRE	10.6135	11.7709	5.94685	9.32283	1.08738	5.73786	1.14066	10.2222	11.2476	5.29015	8.71075	1.07159	5.41701	1.05826
ENSMUSG00000004035	Gstm7	TRE	0.435798	7.90628	0.313539	6.71503	0.124036	4.92219	0.126384	0.501217	9.0708	0.428025	8.07924	0.081926	5.43156	0.12686
ENSMUSG00000004038	Gstm3	TRE	1.11896	32.4194	1.62931	42.6895	2.71	28.4232	3.37292	0.0969194	16.2619	0.247917	21.0332	0.0636663	12.1691	0.087927
ENSMUSG00000004040	Stat3	NRE	43.6168	111.658	81.5031	104.438	172.878	120.281	182.574	54.9382	140.188	97.0996	126.188	205.104	144.944	216.986
ENSMUSG00000004043	Stat5a	TRE+NRE	7.34519	77.971	60.3674	82.0367	126.647	89.8151	120.784	5.07892	63.4406	46.9595	69.6038	95.3793	71.7974	93.3323
ENSMUSG00000004044	Ptrf	NRE	21.69	11.0439	10.591	11.8091	15.3652	12.425	14.0413	33.444	16.7554	15.5122	17.849	22.3393	18.3609	20.6913
ENSMUSG00000004054	Map3k11	NRE	9.50529	10.3778	12.221	9.03168	9.97521	11.7134	10.2272	8.82674	9.39674	10.7265	8.20288	8.71298	10.4234	9.06635
ENSMUSG00000004056	Akt2	NRE	13.7423	10.2941	13.5113	10.1736	10.5648	11.0546	10.7988	28.1101	22.2356	25.5695	21.68	21.7001	22.4089	22.9354
ENSMUSG00000004069	Dnaja3	NRE	25.4357	19.1732	18.0742	20.8809	24.1236	20.1942	25.0354	23.1361	17.5088	15.6808	18.6814	20.9823	17.8617	21.9036
ENSMUSG00000004070	Hmox2	NRE	20.7759	15.2599	16.7193	19.8545	26.2757	23.0483	27.6261	32.9038	22.8592	24.1101	31.5912	39.797	35.5794	42.6847
ENSMUSG00000004071	5730403B10Rik	NRE	19.7213	12.4441	14.6186	12.3951	16.8205	14.2547	17.8551	28.5428	16.2026	18.686	14.3482	20.2907	16.8226	21.3801
ENSMUSG00000004085	B230120H23Rik	TRE+NRE	11.7385	6.50016	14.8903	4.54649	5.17277	4.18283	4.00543	19.8811	10.1695	20.9105	7.05966	7.62501	6.51961	6.10715
ENSMUSG00000004096	Cwc15	NRE	66.0557	61.8968	51.5217	61.602	61.4477	54.7806	59.008	54.2716	49.9108	39.7078	49.4677	47.2793	41.8331	45.1436
ENSMUSG00000004098	Col5a3	NRE	0.599495	12.7158	1.14927	17.0438	4.54683	17.1051	5.91733	0.463513	9.57433	0.861218	13.0426	3.27972	12.4873	4.27695
ENSMUSG00000004099	Dnmt1	NRE	31.0148	29.8108	30.987	23.2611	32.2661	20.5728	26.8342	25.3526	24.1372	23.9308	18.8741	24.8266	16.0372	20.7786
ENSMUSG00000004100	Ppan	NRE	12.9456	10.4774	13.9749	9.91774	10.864	9.01587	8.44648	11.0418	8.92454	10.8529	8.14945	8.62797	7.23495	6.75992
ENSMUSG00000004105	Angptl2	NRE	55.6041	14.8999	54.657	10.4846	19.8377	9.14187	14.0041	54.6059	14.3627	51.021	10.0257	18.2723	8.47888	12.9786
ENSMUSG00000004110	Cacna1e	TRE	0.338515	1.29127	0.508515	1.74602	2.0101	1.82799	1.94321	0.319192	1.19258	0.43595	1.61622	1.74771	1.63517	1.7316
ENSMUSG00000004113	Cacna1b	TRE	0.196747	12.183	5.78818	20.8314	36.7605	26.1835	37.9649	0.470104	32.5008	11.4804	58.7935	102.809	74.0828	112.779
ENSMUSG00000004127	Rg9mtd2	TRE+NRE	2.18245	3.31464	2.18566	4.15913	4.22005	3.71241	3.99704	4.02615	5.64393	3.57536	7.04227	7.49745	6.41817	6.00341
ENSMUSG00000004151	Etv1	TRE+NRE	0.906469	2.59932	2.68632	2.75777	1.5223	2.04393	1.95496	0.902604	2.71882	2.76914	3.07829	1.51965	2.0767	1.80553
ENSMUSG00000004187	Kifc2	TRE	3.12061	2.3744	5.74198	3.36199	4.01313	5.20683	4.86375	2.68258	2.05844	4.65918	2.82431	3.32335	4.33507	3.93428
ENSMUSG00000004207	Psap	NRE	343.963	344.695	432.194	346.762	526.733	447.772	578.23	309.446	304.493	363.663	302.579	443.375	381.937	488.47
ENSMUSG00000004221	Ikbkg	TRE+NRE	7.65312	6.70425	6.76406	6.29689	7.82006	7.35021	7.75398	17.8025	16.3727	14.0192	14.3854	19.9983	18.3472	18.0324
ENSMUSG00000004231	Pax2	not present	0.00374048	1.00049	0.101141	0.894161	0.135505	0.979059	0.196182	0.00993269	2.12802	0.157906	1.64298	0.264703	1.8859	0.370578
ENSMUSG00000004233	Wars2	NRE	5.02953	3.69358	3.92906	3.7846	4.4251	3.90592	4.34695	4.64521	3.34972	3.32656	3.37112	3.73438	3.38083	3.72176
ENSMUSG00000004263	Atn1	NRE	32.0024	16.6998	31.5376	14.9183	21.7154	19.2192	22.0829	43.1543	21.7227	36.684	18.1077	24.8421	21.5857	25.1999
ENSMUSG00000004264	Phb2	NRE	102.415	71.9575	72.3579	60.4809	55.1952	50.5295	49.3969	98.7522	64.3656	68.1246	57.9238	51.0587	46.666	42.5904
ENSMUSG00000004266	Ptpn6	TRE+NRE	22.4627	27.6912	84.2272	33.1782	42.7896	49.7186	53.6032	29.2253	36.3901	105.691	46.1234	53.9398	62.2389	65.8273
ENSMUSG00000004267	Eno2	TRE	0.925468	19.806	5.24321	28.9041	46.2103	36.216	48.7788	0.912187	22.8373	5.87918	34.3045	50.399	39.7815	52.5448
ENSMUSG00000004268	Emg1	NRE	57.6762	36.2686	42.0142	30.3209	32.355	28.281	28.9351	50.1141	30.7709	33.7707	25.4358	26.067	22.9093	23.0592
ENSMUSG00000004270	Lpcat3	NRE	31.9595	23.1849	26.9939	19.8877	23.492	22.711	23.3968	26.4149	18.9004	21.0973	16.2215	18.4377	18.0175	18.4932
ENSMUSG00000004285	Atp6v1f	NRE	77.7145	82.1717	71.7087	88.8156	90.8299	92.045	93.9426	84.69	88.1826	74.5465	95.5212	93.425	95.8563	97.2985
ENSMUSG00000004296	Il12b	not detected	0.140651	5.593	0.204593	4.66009	0.710249	3.84265	0.870873	0.126665	5.23237	0.163089	4.2353	0.572721	3.32494	0.671906
ENSMUSG00000004317	Clcn5	TRE+NRE	5.81819	5.37016	1.70026	5.28955	5.37229	4.8974	5.93731	7.62816	7.23316	2.28136	7.10194	7.18124	6.38209	8.25414
ENSMUSG00000004319	Clcn3	NRE	5.74985	18.5837	12.014	20.4333	28.8906	23.1435	31.8132	6.81466	22.0234	13.6912	24.029	33.1649	26.9243	36.6983
ENSMUSG00000004328	Hif3a	TRE	0.155602	0.480149	0.144346	0.505461	0.568744	0.890547	0.736506	0.153123	0.504497	0.118145	0.512449	0.573256	0.999072	0.810072
ENSMUSG00000004341	Gpx6	TRE	0.697942	22.9127	0.634786	30.7815	5.34415	13.9346	6.69622	0.568465	20.3805	0.583225	26.5423	4.42427	11.7706	5.77251
ENSMUSG00000004344	Gpx5	TRE	0.00324163	0.444241	0.105183	0.719329	0.00854065	0.272875	0.0124404	0	0.27251	0.0124965	0.633138	0	0.173658	0
ENSMUSG00000004347	Pde1c	TRE+NRE	0.723928	11.5888	5.75905	12.1858	18.0391	11.0995	17.5151	1.43012	22.5078	11.4709	23.6707	34.3514	21.2334	33.485
ENSMUSG00000004356	Utp20	NRE	6.55161	6.64549	6.64008	5.24473	4.40843	3.42724	3.44768	5.47211	5.54168	5.24326	4.35227	3.51934	2.75855	2.74593
ENSMUSG00000004359	Spic	TRE	6.41751	16.5735	8.15136	18.6916	14.6777	17.0112	15.1046	3.12917	8.54056	3.33321	9.25435	6.71285	8.35656	6.93402
ENSMUSG00000004360	9330159F19Rik	TRE	0.145765	0.376099	0.289202	0.489697	0.201809	0.343938	0.203969	0.0877086	0.306658	0.19715	0.401626	0.0976656	0.232922	0.0841998
ENSMUSG00000004364	Cul3	NRE	32.3907	42.743	36.3693	38.4315	43.3648	37.2771	46.6537	57.4115	75.8781	63.1381	66.5002	66.2073	59.5786	71.4615
ENSMUSG00000004366	Sst	TRE	0.217422	38.1496	11.3839	37.2084	0.119341	28.3959	0.185422	0.228992	37.4767	10.9014	36.6094	0.133649	26.6609	0.180588
ENSMUSG00000004371	Il11	NRE	0.3954	0.751667	0.412272	0.800101	0.976816	0.825074	1.18062	0.271321	0.693555	0.239723	0.701053	0.783126	0.630546	0.960831
ENSMUSG00000004383	Large	NRE	6.23703	5.89065	6.88713	5.77105	6.62156	6.54253	6.30173	6.71823	6.30219	7.08541	6.1531	6.61887	6.63292	6.35012
ENSMUSG00000004393	Ddx56	NRE	22.8878	18.0375	16.7216	15.6508	15.3386	13.2062	14.3732	19.5895	14.7667	13.1601	12.9336	12.2248	10.8523	11.5233
ENSMUSG00000004394	Tmed4	NRE	20.8011	34.3189	31.1267	39.0901	41.6563	40.9558	43.0541	29.3215	46.8104	37.5613	49.4439	55.5279	59.0846	58.647
ENSMUSG00000004415	Emid2	TRE	0.471192	1.46376	0.532223	1.15478	0.159027	0.751272	0.119556	0.441769	1.48768	0.536638	1.3115	0.183826	0.810617	0.106453
ENSMUSG00000004446	Bid	NRE	4.64178	5.12091	4.36353	5.98322	3.97724	5.34328	3.69206	5.01228	5.54384	4.43689	6.43715	4.15989	5.52794	3.89193
ENSMUSG00000004451	Ralb	NRE	64.2307	29.6775	22.0913	35.507	33.8779	32.3665	32.898	75.8752	34.9781	24.7055	39.6984	40.2607	39.5077	39.2218
ENSMUSG00000004455	Ppp1cc	NRE	77.1811	50.2732	49.6321	44.0906	40.8072	38.4095	36.5635	84.1837	55.0426	52.762	48.764	43.1896	41.5538	39.5431
ENSMUSG00000004460	Dnajb11	NRE	16.9477	49.7023	24.6722	50.7816	43.5739	48.0682	46.9558	23.5569	68.335	32.4925	69.9222	56.9937	64.0215	62.0591
ENSMUSG00000004462	Tbccd1	NRE	6.41299	5.35314	5.90869	5.20199	5.05053	5.33553	5.38611	6.0438	4.99101	5.31551	4.77187	4.42966	4.73871	4.73726
ENSMUSG00000004473	Clec11a	TRE	24.1579	0.712964	0.994964	0.639316	0.197756	0.36759	0.220486	23.5905	0.707595	0.939529	0.608939	0.189821	0.32172	0.208685
ENSMUSG00000004500	Zfp324	NRE	2.93599	1.98917	2.37496	1.97247	2.02316	1.92797	1.89975	2.97588	1.99445	2.27744	1.95924	1.90114	1.87062	1.80089
ENSMUSG00000004508	Gab2	TRE+NRE	3.15799	2.90527	2.79371	3.88078	5.28063	5.09	6.27616	3.15761	2.84413	2.61732	3.74418	4.81964	4.78972	5.81044
ENSMUSG00000004530	Coro1c	NRE	14.2352	11.2644	10.7349	9.50344	7.98379	9.98396	7.35686	15.0055	11.812	10.6693	9.91419	7.98463	9.88735	7.21976
ENSMUSG00000004535	Tax1bp1	NRE	86.7832	75.9073	69.1786	89.3305	127.769	97.879	137.509	85.325	76.6663	68.316	92.8089	125.531	94.0138	134.192
ENSMUSG00000004540	Psg17	TRE	0.011944	2.25551	0.111536	3.39174	0.10994	2.17067	0.14245	0.0056144	1.49715	0.0742775	2.26938	0.0860448	1.34528	0.103584
ENSMUSG00000004542	Psg19	TRE	0.0189382	0.907543	0.0334165	1.38559	0.0415072	0.871265	0.0551386	0.00883441	0.328455	0	0.584519	0.0110754	0.331661	0.0106695
ENSMUSG00000004552	Ctse	NRE	0.383227	3.54124	0.0904344	4.02519	2.42323	4.34186	2.18972	0.374302	3.30265	0.0970923	3.57628	1.9808	3.70994	2.02917
ENSMUSG00000004558	Ndrg2	NRE	1.20572	12.0185	6.88524	13.2008	7.99043	12.9021	10.1355	1.03198	10.0043	5.32912	10.6744	6.18637	10.071	7.59031
ENSMUSG00000004561	Mettl17	NRE	8.47078	6.32984	11.1528	7.55914	9.71323	8.17505	9.69524	10.2266	6.29864	11.6603	7.7155	9.82809	9.31564	10.9984
ENSMUSG00000004562	Arhgef40	not detected	37.9086	26.5216	19.6282	32.2648	40.8451	35.7137	42.4841	32.8757	23.0025	15.8974	27.9499	33.9428	30.1976	35.3799
ENSMUSG00000004565	Pnpla6	NRE	8.86151	9.7707	17.2126	10.3382	12.4177	13.7382	12.4816	7.23412	7.98863	13.4145	8.32058	9.5411	10.9636	9.72727
ENSMUSG00000004567	Mcoln1	NRE	9.20595	6.94887	12.5305	7.72175	8.52732	8.93062	9.29293	8.81837	6.667	11.2825	7.27602	7.71574	8.16774	8.57266
ENSMUSG00000004568	Arhgef18	TRE+NRE	13.1612	9.51006	12.9986	9.61328	12.4837	11.3845	12.5088	12.8651	9.35296	11.8516	9.1844	11.9225	10.6884	11.3067
ENSMUSG00000004591	Pkn2	NRE	20.8489	13.5474	13.6214	12.4213	11.2761	10.4317	11.299	27.3459	19.0821	16.2646	16.7029	16.4687	14.7369	16.4937
ENSMUSG00000004609	Cd33	TRE	0.0602426	0.58935	0.42957	0.903475	0.0722136	0.750945	0.118727	0.04334	0.50265	0.355949	0.802631	0.048722	0.672798	0.0981939
ENSMUSG00000004610	Etfb	NRE	59.5539	41.4056	33.821	38.3519	34.4908	42.5931	35.9883	51.2209	34.9521	27.1076	32.1922	27.9042	34.6053	29.3057
ENSMUSG00000004612	Nkg7	TRE	0.135971	0.629195	0.0972324	1.14705	0.0814183	0.710061	0.0316253	0.178044	0.570774	0.0875953	1.09477	0.0321287	0.638229	0.0197107
ENSMUSG00000004613	Lim2	TRE	0	0.111982	0	0.220744	0	0.129381	0	0	0.109869	0	0.269807	0	0.130775	0
ENSMUSG00000004626	Stxbp2	NRE	34.8278	40.0674	46.8022	41.8114	51.3078	50.3423	53.1586	40.1405	45.0258	50.5308	47.4477	55.7395	55.2927	57.6844
ENSMUSG00000004630	Pcp2	TRE	0.538165	4.11193	0.734935	4.10885	0.738484	3.65363	0.917917	0.280498	4.46263	0.612588	4.40198	0.769362	3.91076	0.917198
ENSMUSG00000004631	Sgce	NRE	9.38567	0.804569	3.13024	0.45539	0.213503	0.207027	0.192518	8.82707	0.778303	2.73891	0.435379	0.200107	0.22026	0.164991
ENSMUSG00000004633	Chn2	TRE	0.12227	1.34569	7.63881	1.56567	0.660537	1.68943	0.964335	0.380422	3.62171	18.434	4.18928	1.77368	4.63702	2.43238
ENSMUSG00000004637	Wwox	TRE+NRE	2.74357	1.37744	1.24843	1.34593	1.33968	1.40901	1.37593	6.28214	3.00531	2.63193	2.99061	2.9507	3.09732	2.96809
ENSMUSG00000004642	Slbp	TRE+NRE	25.0922	24.0877	18.7025	19.9421	17.7675	15.4656	15.1777	33.4882	32.5512	23.4107	26.7967	22.7523	20.1844	20.1218
ENSMUSG00000004651	Tyr	TRE	0.695424	1.02479	0.73927	0.965313	1.41282	1.3032	1.54359	0.410359	0.826314	0.398794	0.690116	0.860276	0.854269	1.05197
ENSMUSG00000004654	Ghrhr	TRE	0.0543329	3.15121	0.213692	4.91171	1.22572	3.34926	1.57254	0.0569989	2.48214	0.157773	3.95066	0.907907	2.64115	1.16367
ENSMUSG00000004655	Aqp1	NRE	1.27245	11.5377	0.629633	14.8097	0.408176	11.2121	0.512637	1.32178	11.4321	0.604396	14.7007	0.385698	10.7888	0.480934
ENSMUSG00000004661	Arid3b	TRE	3.30919	4.44182	3.57589	4.32856	5.57406	4.87439	5.72266	5.67649	6.51767	5.16538	6.59711	8.25041	7.84263	8.83448
ENSMUSG00000004665	Cnn2	NRE	48.8502	31.7769	73.2917	17.515	27.5063	16.798	22.9922	59.8584	39.9731	87.8003	22.8584	32.8556	20.2598	27.7073
ENSMUSG00000004667	Polr2e	NRE	37.9571	38.3213	36.2339	37.7991	45.083	39.3155	45.0609	32.0879	31.6745	29.0957	31.6332	35.473	31.437	35.9065
ENSMUSG00000004668	Abca13	TRE	0.035051	3.72665	3.32048	4.67083	1.19786	3.9648	1.64695	0.0313224	3.32848	2.84115	4.14882	1.00582	3.39725	1.39704
ENSMUSG00000004677	Myo9b	NRE	14.706	14.2824	19.8279	13.8292	19.5159	16.966	19.3198	13.0018	12.4433	16.6785	11.9637	16.2155	14.3596	16.3298
ENSMUSG00000004698	Hdac9	TRE+NRE	0.0638811	4.70949	1.66008	6.432	14.7736	8.36088	16.0118	0.13402	9.40791	3.10601	12.7387	26.6785	15.5062	29.4232
ENSMUSG00000004707	Ly9	TRE	0.824479	10.581	0.60021	12.5981	40.5153	19.4487	39.1253	0.836058	11.7272	0.634688	14.0352	43.4346	21.6268	42.837
ENSMUSG00000004709	Cd244	TRE	0.0387506	0.917116	0.0913258	0.96829	0.481012	0.688356	0.340082	0.0371877	1.1017	0.112609	1.12814	0.522112	0.717556	0.374762
ENSMUSG00000004730	Emr1	TRE	0.0602015	7.3171	0.190734	9.54689	0.25554	5.15827	0.256706	0.0485391	6.70527	0.143445	8.24946	0.192093	4.47965	0.245736
ENSMUSG00000004748	Mtfp1	NRE	1.40758	0.798096	0.605032	1.46631	1.44896	1.8007	1.29881	1.37144	0.763532	0.511874	1.39107	1.28868	1.54124	1.15433
ENSMUSG00000004768	Rab23	TRE+NRE	4.69767	3.34581	4.21221	2.95022	2.39868	2.16644	2.09545	6.9475	4.74013	5.7612	4.24564	3.30634	3.03226	2.84441
ENSMUSG00000004771	Rab11a	NRE	34.3428	42.0004	37.6067	46.1605	36.0214	45.2711	41.2139	108.837	124.229	103.954	137.69	105.902	137.864	119.387
ENSMUSG00000004788	Eif2b2	NRE	25.5874	29.8655	39.5136	24.24	27.7568	27.5933	27.421	27.2089	31.3105	36.4299	24.3737	28.2597	27.9835	26.9656
ENSMUSG00000004789	Dlst	NRE	56.9109	46.0972	41.9713	46.7673	47.7288	52.4403	48.3601	57.7344	45.6668	39.75	45.866	42.6459	48.933	44.4276
ENSMUSG00000004791	Pgf	NRE	0.192088	5.60062	18.8669	3.63973	2.66601	2.61728	1.07944	0.178132	4.97239	15.589	3.12948	2.30794	2.2709	0.849817
ENSMUSG00000004798	Ulk2	TRE+NRE	11.2291	8.69062	10.7735	9.03885	7.41614	8.10683	7.51106	9.86378	7.47094	8.8784	7.64176	5.96406	6.66378	6.19141
ENSMUSG00000004814	Ccl24	not detected	0.048881	1.06849	0.0822741	1.45111	0.153125	0.869278	0.0854654	0.0340755	0.971175	0.056095	1.32307	0.106464	0.76764	0.0632453
ENSMUSG00000004815	Dgkq	NRE	6.97378	3.8575	7.93537	4.05243	3.91446	4.6761	3.97836	5.42278	2.8506	6.0908	3.05936	2.62333	3.44927	2.71048
ENSMUSG00000004821	Tmed11	TRE	0	0.194931	0	0.215207	0	0	0	0	0.141634	0	0.159414	0	0	0
ENSMUSG00000004837	Grap	TRE	2.22808	49.6457	5.32025	87.952	124.549	134.965	152.566	2.12052	46.2861	4.77136	81.4765	110.179	121.717	135.586
ENSMUSG00000004842	Pou1f1	TRE	0.126452	1.35122	0.170271	1.20108	0.238421	1.03192	0.223733	0.0489106	1.21546	0.0591655	1.10878	0.0997869	0.911208	0.0459554
ENSMUSG00000004843	Chmp2b	NRE	71.9557	37.1888	43.3411	34.0378	21.3756	26.8729	23.1442	66.3356	34.214	37.6226	30.9084	18.3561	23.7266	20.2214
ENSMUSG00000004846	Plod3	NRE	10.8482	13.8316	23.5109	11.7998	14.3987	13.0987	13.3607	12.6161	16.3694	27.7214	12.7905	17.2569	15.7939	16.4123
ENSMUSG00000004849	Ap1s1	NRE	20.15	29.0018	23.4687	27.8513	23.5225	27.1056	24.278	44.5894	62.4758	46.3628	57.9768	49.6648	56.5447	49.5664
ENSMUSG00000004864	Mapk13	NRE	6.05023	63.479	181.697	47.8808	59.571	41.1448	34.4344	4.71926	49.4068	136.769	37.73	44.9288	30.9757	25.7955
ENSMUSG00000004865	Srpk1	NRE	16.0409	19.1088	30.5663	19.7609	17.9193	15.0589	15.7741	15.3984	18.0755	27.7262	18.0778	16.3374	14.1243	14.2915
ENSMUSG00000004872	Pax3	TRE	0.0364056	0.957766	0.343885	0.856891	0.147983	0.712777	0.173892	0.0323706	0.973566	0.361301	0.903741	0.139153	0.742168	0.157826
ENSMUSG00000004880	Lbr	NRE	17.4363	11.2101	9.05449	8.1169	6.50635	5.21728	5.44627	15.8041	10.0663	7.76568	7.26439	5.52727	4.43788	4.58779
ENSMUSG00000004885	Crabp2	NRE	22.9417	21.6126	9.02071	14.8506	4.65307	15.6291	6.12902	20.657	18.9859	7.6577	13.3174	3.88244	13.5447	5.41057
ENSMUSG00000004891	Nes	TRE+NRE	13.8045	3.68518	0.721172	2.66435	0.952203	2.51157	1.0901	13.7257	3.5989	0.67852	2.63134	0.887562	2.43612	1.06281
ENSMUSG00000004892	Bcan	TRE	0.0398641	4.88099	0.0293974	3.20331	0.100653	2.87321	0.174234	0.0387067	4.20353	0.0287584	2.73277	0.0828438	2.40253	0.141444
ENSMUSG00000004894	Hapln2	TRE	0.0317153	1.62678	0.043658	1.58029	0.300815	2.24808	0.389484	0.0344542	1.33166	0.0304592	1.40467	0.249532	1.80138	0.301838
ENSMUSG00000004895	Prcc	NRE	25.9243	18.4222	21.2918	16.5818	18.2488	17.9018	17.602	23.649	16.5657	18.5555	15.0094	15.8933	15.5695	15.2907
ENSMUSG00000004896	Rrnad1	NRE	12.5944	10.2584	14.3676	11.4871	10.2733	10.3136	10.2855	7.13579	4.08773	7.31187	4.35903	5.04907	4.71904	4.96353
ENSMUSG00000004897	Hdgf	NRE	98.8932	71.7733	65.0443	66.8525	70.285	61.4279	61.9471	112.035	79.4008	68.0161	72.6932	74.309	66.0559	66.2084
ENSMUSG00000004902	Slc25a18	TRE	0.0627794	0.914116	0.470677	0.918176	0.13439	0.876051	0.160619	0.0336031	0.749225	0.353033	0.757615	0.0797535	0.693279	0.0960642
ENSMUSG00000004929	Thop1	TRE	12.681	12.1392	11.9147	10.9585	10.7531	11.2894	8.99584	11.1421	10.5938	9.87077	9.4401	8.87021	9.36145	7.42982
ENSMUSG00000004931	Apba3	NRE	14.0481	8.02075	12.465	7.76573	10.3256	10.8357	11.8465	12.1707	6.66157	10.0293	6.4711	8.34412	8.83086	9.51131
ENSMUSG00000004933	Matk	TRE	0.422399	3.19233	11.9996	2.03431	2.27088	3.77386	3.27859	0.543525	4.1977	15.3566	2.56326	2.70432	4.80003	4.13824
ENSMUSG00000004934	Pias4	TRE	10.9825	10.452	9.21105	10.1779	13.4606	13.2072	13.7178	11.7238	11.6589	9.79666	10.8703	15.0151	13.9243	14.7639
ENSMUSG00000004936	Map2k1	NRE	106.959	40.2554	32.6315	40.2644	50.8878	42.7829	55.8075	94.2076	34.8347	27.1676	34.8251	42.3554	36.1162	46.759
ENSMUSG00000004937	Sgta	NRE	43.6931	31.569	34.8428	31.4952	35.2452	36.0474	35.918	37.9657	27.2913	28.8253	27.0889	28.871	29.4992	29.675
ENSMUSG00000004939	Itgb1bp3	TRE	0.204543	0.649104	0.296941	0.685983	0.811339	0.805723	0.858567	0.131586	0.489743	0.204445	0.526277	0.5747	0.650866	0.583399
ENSMUSG00000004945	5730437N04Rik	NRE	37.1964	28.411	24.8819	27.2691	29.8757	26.8649	30.6294	38.3073	28.9542	23.6955	26.7783	28.7183	25.8311	30.4982
ENSMUSG00000004947	Dtx2	NRE	6.70075	21.057	7.70876	20.8827	37.9886	29.5815	41.4347	6.45919	20.01	7.0128	19.8454	34.8508	27.4505	38.173
ENSMUSG00000004948	Zp3	TRE	0.0984398	8.62424	0.104857	7.41376	0.0540327	6.04593	0.0734576	0.0834073	7.18015	0.0790593	6.01513	0.0455263	4.9936	0.0513996
ENSMUSG00000004951	Hspb1	NRE	1.29478	68.1199	288.48	91.9335	45.2116	120.957	56.1445	1.12234	57.0887	238.69	79.8405	33.9497	95.8463	44.1914
ENSMUSG00000004952	Rasa4	TRE	0.889756	3.4739	2.47155	4.82509	7.60756	5.98045	8.57332	1.04818	3.67572	2.78044	5.2403	7.88452	6.47631	8.60657
ENSMUSG00000004961	Syt5	TRE	0.0248494	1.39258	4.11702	1.06524	0.450107	0.895515	0.61987	0.0263776	1.21498	3.44642	0.923425	0.3836	0.78543	0.574854
ENSMUSG00000004980	Hnrnpa2b1	NRE	271.099	209.588	194.88	198.237	183.283	162.81	166.602	403.074	313.712	271.193	291.829	271.32	245.913	247.333
ENSMUSG00000004988	Fxyd4	TRE	0.217241	1.42654	0.240304	1.13212	0.190786	0.971248	0.324218	0.159067	0.846867	0.149971	0.680204	0.131622	0.533076	0.169817
ENSMUSG00000004994	Ccdc130	TRE	5.2498	5.86084	6.0029	7.3668	10.9775	8.41	11.6362	6.53444	7.15995	7.33781	8.87745	12.8435	10.3241	14.4808
ENSMUSG00000004996	Mri1	NRE	8.52152	4.46781	5.48523	4.41552	5.39343	4.47201	5.02815	17.8681	9.11965	10.3158	9.13195	10.3342	8.82689	9.38782
ENSMUSG00000005034	Prkacb	NRE	22.3885	9.05338	13.4782	7.51339	6.22481	5.97616	5.96224	26.7298	10.7794	15.5451	8.9315	6.89534	6.67248	6.5333
ENSMUSG00000005043	Sgsh	TRE+NRE	1.10806	3.46716	4.70719	4.3009	3.17299	4.58135	3.12646	1.0903	2.26816	3.54129	2.68295	2.39362	2.62606	2.24268
ENSMUSG00000005045	Chd5	TRE	0.0383154	0.462047	0.257753	0.875447	0.13719	0.818513	0.205777	0.0420492	0.482652	0.264889	0.957112	0.125323	0.813572	0.211193
ENSMUSG00000005054	Cstb	NRE	2166.97	297.287	215.438	370.567	391.104	356.559	402.111	1826.63	248.108	174.509	308.081	317.203	293.609	328.683
ENSMUSG00000005057	Sh2b2	TRE	0.278184	2.20457	5.13704	1.56054	1.30521	1.4621	1.04809	0.253202	1.90308	4.4758	1.41698	1.11309	1.24953	0.92521
ENSMUSG00000005069	Pex5	NRE	15.5553	9.56037	12.349	8.69546	8.33995	9.34007	8.29964	14.4014	8.63262	10.7803	7.94454	7.11755	8.29619	7.27019
ENSMUSG00000005078	Jkamp	NRE	10.3188	10.3819	10.2405	11.0476	10.0905	10.7093	11.3907	11.0756	12.3423	11.7928	12.842	12.6926	13.0845	13.9854
ENSMUSG00000005087	Cd44	NRE	24.9948	20.871	38.3477	22.1754	15.8892	20.6292	15.2844	33.037	27.6512	49.309	29.4568	23.0403	30.6949	23.0142
ENSMUSG00000005089	Slc1a2	TRE	0.0238288	1.48443	0.225995	2.43618	2.05355	2.70897	2.69959	0.0299391	5.33117	0.585317	6.62079	6.68086	8.74673	7.16893
ENSMUSG00000005102	Eif2ak4	NRE	4.87645	2.97013	6.26666	2.81323	2.40614	2.19916	2.23998	5.86032	3.65774	7.2965	3.33932	2.84318	2.61156	2.57644
ENSMUSG00000005103	Wdr1	NRE	64.4258	73.2092	64.4945	71.2772	80.0741	81.3707	80.5035	56.326	63.3074	53.654	61.7161	65.6307	67.5356	66.1759
ENSMUSG00000005107	Slc2a9	TRE+NRE	7.88556	2.88645	2.84165	2.82891	2.32015	3.75996	2.42714	8.97525	3.28445	3.02538	3.26982	2.52682	4.49178	2.80162
ENSMUSG00000005124	Wisp1	TRE	0.0425858	1.23183	0.541205	1.21632	0.729298	0.860812	0.708354	0.0556762	1.22623	0.518216	1.20501	0.905511	0.970734	0.669187
ENSMUSG00000005125	Ndrg1	NRE	0.994491	11.2108	10.2998	12.3447	6.19777	13.9333	7.4236	1.10242	11.236	10.9335	11.8323	6.87283	13.6473	7.41213
ENSMUSG00000005131	4930550C14Rik	TRE	6.89609	3.8494	7.08482	3.26846	2.57411	1.57074	2.01014	6.84783	3.58979	6.61559	3.37399	2.435	1.53917	1.97593
ENSMUSG00000005142	Man2b1	NRE	12.5355	16.6393	26.6337	15.1421	15.1317	17.4988	16.076	9.93302	13.1687	20.1369	11.9496	11.4997	13.5466	12.2581
ENSMUSG00000005148	Klf5	NRE	1.73421	9.69776	18.9429	8.4789	4.32816	13.3213	5.48563	1.65347	9.37913	17.4268	8.06349	4.00648	12.5696	5.15315
ENSMUSG00000005150	Wdr83	NRE	17.0033	13.2817	17.311	14.2681	15.3498	15.5448	16.0083	17.3565	13.7405	20.7044	14.8399	15.6224	15.8124	15.0374
ENSMUSG00000005161	Prdx2	NRE	133.25	111.437	117.152	106.529	108.533	103.011	104.739	141.282	115.844	116.863	109.815	106.974	102.614	103.198
ENSMUSG00000005198	Polr2a	NRE	49.2555	35.6084	38.483	32.433	31.8502	34.0478	29.9134	45.8205	32.9867	33.4088	29.6328	28.0132	30.9582	26.633
ENSMUSG00000005202	Shbg	not detected	0.00764834	0.591454	0	0.540015	0.0100754	0.348162	0.009784	0.00830883	0.533605	0	0.495286	0.00859611	0.294737	0.0096215
ENSMUSG00000005204	Senp3	NRE	26.0014	24.8222	29.161	24.473	26.0887	24.6961	25.4968	24.7617	23.2816	26.4553	22.9905	23.5448	22.0941	22.7801
ENSMUSG00000005220	Corin	TRE	0.0174837	0.489897	0.032233	0.72744	0.322447	0.41452	0.301937	0.0191356	0.490441	0.0292718	0.696364	0.322478	0.397605	0.310551
ENSMUSG00000005225	Plekha8	NRE	2.2578	4.0719	2.73809	4.47874	3.87332	4.46059	4.20066	3.42079	6.96739	3.98655	7.46373	6.14411	7.14153	6.39876
ENSMUSG00000005232	G6pc2	TRE	0	0.348134	0.028201	0.543872	0.204028	0.509808	0.300858	0	0.358476	0.0297973	0.568053	0.198338	0.468766	0.236892
ENSMUSG00000005233	Spc25	TRE+NRE	30.068	17.5454	3.34069	16.036	13.4749	9.31822	12.4856	38.4172	20.4743	3.40399	18.5072	15.2062	10.4328	14.1026
ENSMUSG00000005237	Dnahc2	TRE	0.232836	2.41173	0.552096	2.80462	0.961379	2.64888	0.992836	0.197138	2.02134	0.447475	2.33461	0.763109	2.13305	0.771652
ENSMUSG00000005251	Ripk4	NRE	15.427	11.3063	18.0059	9.75056	14.42	13.0662	14.614	16.6218	12.0478	18.3074	10.242	14.7504	13.3869	14.9525
ENSMUSG00000005262	Ufd1l	NRE	34.0688	22.383	27.3805	21.4774	22.3183	19.9847	23.3957	31.6295	19.5644	23.6465	19.4212	19.6336	18.3581	20.7977
ENSMUSG00000005267	Zfp287	NRE	0.727949	0.682284	0.894606	0.651182	0.826843	0.691291	0.859318	1.01227	1.00108	1.33001	0.946759	0.991257	0.827949	1.03589
ENSMUSG00000005268	Prlr	TRE+NRE	0.235003	2.46868	1.37336	1.86044	2.67012	2.09172	2.95288	0.228991	3.97799	2.15574	3.07262	4.90504	3.73472	5.14647
ENSMUSG00000005299	Letm1	NRE	11.4524	14.2728	13.2012	14.5645	15.0417	15.2821	15.1054	9.98704	12.2494	10.9081	12.3467	12.2564	12.7565	12.3383
ENSMUSG00000005312	Ubqln1	NRE	57.282	58.9294	39.8001	56.794	57.4908	54.1071	59.5508	55.2562	55.0616	35.6592	52.4664	50.6592	48.499	52.7028
ENSMUSG00000005320	Fgfr4	TRE	0.00650659	1.04454	3.17643	0.977868	0.15857	0.638215	0.166469	0.0970393	0.891851	2.49638	0.86992	0.133261	0.763326	0.144304
ENSMUSG00000005338	Cadm3	TRE+NRE	0.0135843	6.50986	4.73883	7.39768	5.4457	7.42206	5.32564	0.0185249	9.44942	6.767	11.2348	8.15389	11.2564	7.96728
ENSMUSG00000005339	Fcer1a	TRE	0.010578	2.98209	0.145612	2.66737	0.139347	2.54519	0.148848	0.0114915	2.58264	0.133416	2.35892	0.126321	2.16507	0.132173
ENSMUSG00000005354	Txn2	NRE	16.6787	10.3148	11.7125	10.7536	11.478	11.4704	10.7797	71.6785	42.4578	44.35	44.4571	44.0856	44.6601	39.851
ENSMUSG00000005355	Casp14	TRE	0.186397	3.98674	1.09966	3.63799	0.220993	3.05057	0.238446	0.189378	3.68177	1.01399	3.39735	0.18037	2.75706	0.227331
ENSMUSG00000005357	Slc1a6	TRE	0.233789	0.549239	0.0102166	0.41398	0.00684397	0.275913	0.006646	0.19285	0.514901	0.0100139	0.363173	0.0058391	0.21141	0.00647272
ENSMUSG00000005360	Slc1a3	TRE+NRE	20.0499	35.8683	24.5071	36.0198	61.4507	34.2844	59.3894	21.47	38.3084	24.631	37.5806	61.1827	34.8003	59.5494
ENSMUSG00000005362	Crbn	NRE	21.2766	19.282	23.6343	17.7232	13.8408	14.0506	13.8396	22.6074	20.2746	24.9167	18.6369	14.2167	14.8272	14.5139
ENSMUSG00000005364	Il5ra	TRE	1.35803	7.52238	6.51917	10.6816	6.83112	9.85784	5.55847	0.743319	6.29941	5.28398	9.10566	4.88838	8.16916	3.72623
ENSMUSG00000005370	Msh6	NRE	14.1543	9.91447	11.4966	7.44717	7.5451	6.20773	6.02466	13.3955	9.34143	10.3247	6.92334	6.74854	5.64202	5.45785
ENSMUSG00000005371	Fbxo11	NRE	39.4464	22.9141	27.573	20.8451	19.7985	17.1995	19.554	36.0378	21.042	23.7983	18.672	16.5559	14.7645	16.7635
ENSMUSG00000005373	Mlxipl	TRE	1.06581	2.94184	1.40445	4.5382	2.34845	5.37656	3.2085	1.50542	4.29373	2.21802	6.78591	3.17404	8.31613	4.80872
ENSMUSG00000005374	Tbl2	TRE+NRE	5.49515	4.81355	3.74958	4.8605	5.54138	4.84885	5.17685	6.2349	5.65824	4.2671	5.4178	6.37455	5.75901	5.55153
ENSMUSG00000005378	Wbscr22	NRE	15.9753	17.6435	15.3944	17.9434	18.655	16.6699	17.7195	20.9207	24.8679	22.8688	24.5555	22.9672	21.794	21.8884
ENSMUSG00000005397	Nid1	NRE	7.81035	9.67134	0.333293	12.5556	0.35116	7.63829	0.520114	7.16341	8.92505	0.288879	11.6143	0.279184	6.70103	0.451524
ENSMUSG00000005410	Mcm5	NRE	14.9403	20.2725	16.0331	13.7222	15.0484	8.13789	8.53739	16.2871	22.0557	16.4361	14.7174	15.6412	8.49233	8.71267
ENSMUSG00000005413	Hmox1	NRE	12.2692	34.379	15.0385	57.2146	31.6723	55.3575	36.2733	14.9053	41.5774	18.0256	71.5019	35.3755	66.299	42.5919
ENSMUSG00000005417	Mprip	NRE	32.3205	20.6291	45.0265	20.9642	26.383	24.0088	25.9069	85.9304	52.9112	110.069	54.7746	62.7962	59.5767	63.2949
ENSMUSG00000005442	Cic	NRE	30.2642	14.0995	25.9999	13.0371	18.4714	15.2088	17.5855	54.6428	25.8366	45.9885	22.2361	29.1474	25.181	27.0469
ENSMUSG00000005447	Pafah1b3	NRE	21.5684	24.1091	20.1613	21.3648	30.5392	25.0536	30.812	34.1323	37.1004	30.0026	34.3245	46.1391	37.3176	46.7367
ENSMUSG00000005465	Il27ra	TRE	0.731158	3.12274	0.496011	4.48257	4.16482	4.30096	4.57732	0.6279	2.74841	0.433574	3.90726	3.36353	3.5932	3.65704
ENSMUSG00000005469	Prkaca	NRE	29.3617	20.2654	21.2964	18.6073	23.357	20.9293	22.2016	27.7696	18.9289	19.2167	17.5026	20.4724	18.6926	19.7707
ENSMUSG00000005470	Asf1b	NRE	2.88321	3.6779	1.4861	3.94896	3.73418	2.37495	3.25346	2.74771	3.52886	1.39797	3.72305	3.35492	2.10608	3.0171
ENSMUSG00000005474	Myl10	TRE	0.915419	4.20037	0.246659	4.93187	0.313074	3.44873	0.270238	0.774344	3.14189	0.166526	3.75427	0.177149	2.57632	0.181584
ENSMUSG00000005481	Ddx39	NRE	9.26138	14.5722	10.5095	15.2618	14.3759	13.8754	13.172	17.5366	25.5005	16.111	25.3947	21.5763	21.0388	20.1084
ENSMUSG00000005483	Dnajb1	NRE	48.9963	27.2082	100.197	59.028	51.2526	46.1247	45.0824	53.9803	29.3628	103.721	63.3988	52.0749	47.9261	46.3658
ENSMUSG00000005493	Msh4	TRE	2.62278	8.2077	3.41815	9.14889	5.4147	7.87132	5.43917	0.943323	3.7529	0.70646	3.45685	1.69948	2.7724	1.65015
ENSMUSG00000005501	Usp40	NRE	11.4798	6.5429	8.43972	6.32699	5.34122	5.20656	4.77756	11.0612	6.26992	7.66391	5.97354	4.77073	4.74668	4.21791
ENSMUSG00000005503	Evx1	not detected	0	0.0480043	0	0.0494645	0.00496943	0.0449746	0.00482568	0	0.0490331	0	0.0503947	0.0154843	0.0444523	0.00469986
ENSMUSG00000005505	Kbtbd4	NRE	7.17009	4.82421	5.47121	4.95301	5.58991	5.0619	5.42253	6.99076	4.61521	5.01772	4.78498	5.10247	4.77728	5.00287
ENSMUSG00000005506	Celf1	NRE	25.1699	14.8981	15.4158	13.8856	15.1508	13.3668	14.8244	33.0969	21.1767	18.3563	19.5222	21.0974	18.7991	20.7621
ENSMUSG00000005510	Ndufs3	NRE	67.8986	48.5888	49.959	49.5854	50.5181	49.5031	51.6715	55.6374	39.243	38.5524	39.6086	38.9473	38.7705	40.5182
ENSMUSG00000005514	Por	NRE	26.1346	18.667	17.028	17.191	15.3014	21.73	18.3047	29.5697	22.673	18.2451	20.1103	17.3175	24.3844	20.4277
ENSMUSG00000005533	Igf1r	NRE	28.7619	13.3283	15.4037	9.98572	12.7479	10.3201	11.399	28.0122	12.862	14.0545	9.51864	11.6171	9.63801	10.5015
ENSMUSG00000005534	Insr	NRE	6.59443	15.7196	9.41901	18.8707	24.8543	20.518	26.1672	8.2284	20.1077	10.1269	23.2159	31.7964	25.782	35.0294
ENSMUSG00000005540	Fcer2a	TRE	0.172636	24.2215	25.6496	47.2763	21.5399	36.8155	22.6631	0.130048	24.8135	25.9529	47.7144	21.5953	37.4247	23.1313
ENSMUSG00000005547	Cyp2a5	TRE	2.33467	64.5427	60.8099	133.81	69.9246	176.161	106.227	2.74878	55.5783	49.1741	115.098	52.5034	136.054	79.503
ENSMUSG00000005553	Atp4a	TRE	0.167542	13.884	2.45732	17.9334	10.6799	25.7822	13.2485	0.150475	11.4795	1.93215	14.9602	8.41017	20.7577	10.3557
ENSMUSG00000005566	Trim28	NRE	113.878	88.4109	89.678	76.8238	86.9366	63.2731	69.4132	95.1217	72.8613	70.5054	62.8461	68.3547	50.8724	54.9562
ENSMUSG00000005575	Ube2m	TRE+NRE	59.9352	45.1688	37.9043	44.8451	51.9797	51.5975	49.9806	83.7097	62.2717	49.7679	63.7803	64.529	64.9661	63.9084
ENSMUSG00000005580	Adcy9	NRE	1.58086	2.40194	6.09024	2.92366	4.4484	3.59428	4.59221	1.72839	2.56738	6.21944	3.11164	4.53991	3.69559	4.66667
ENSMUSG00000005583	Mef2c	TRE+NRE	0.32063	0.557328	0.805106	0.593523	0.0850555	0.356259	0.0882266	0.377886	0.65929	0.935724	0.658373	0.100817	0.381879	0.09306
ENSMUSG00000005609	Ctr9	NRE	23.8363	17.2832	17.0465	15.9393	17.5924	14.8992	16.9969	20.5735	15.0178	13.9165	13.6878	14.5841	12.3444	14.2029
ENSMUSG00000005610	Eif4g2	NRE	156.739	185.163	137.692	186.954	176.268	153.282	172.318	325.896	378.452	273.611	384.562	382.382	332.229	381.41
ENSMUSG00000005611	Mrvi1	TRE	0.30166	2.28516	7.54437	2.46578	0.756824	1.73119	0.240641	0.334612	2.56971	7.41731	3.07482	0.714168	1.72101	0.209857
ENSMUSG00000005615	Pcyt1a	TRE+NRE	12.1681	10.9057	6.69237	11.6354	8.07801	11.8421	8.86712	12.8402	11.3901	6.71987	12.2172	8.12956	11.9704	9.16296
ENSMUSG00000005621	Zfp592	NRE	6.92233	4.6809	5.91093	4.41235	5.87043	5.05068	5.89463	6.85031	4.55565	5.55741	4.29403	5.43914	4.75273	5.50775
ENSMUSG00000005625	Psmd4	NRE	124.296	52.4943	55.2374	49.3265	60.7897	56.9393	60.9952	149.39	63.4481	63.0039	60.9256	66.0311	62.4905	65.9484
ENSMUSG00000005628	Tmod4	TRE	3.89673	0.841851	0.404101	0.859783	0.932416	1.19609	1.11964	4.52656	1.04398	0.435827	0.968052	0.888615	1.06915	1.38415
ENSMUSG00000005640	Insrr	not detected	0.0425441	2.0198	6.3877	1.92461	1.83827	1.79141	1.38508	0.0378047	1.74688	5.40742	1.6836	1.5521	1.5386	1.14218
ENSMUSG00000005649	Cabp5	TRE	0.0504244	0.394884	0.0299232	0.360631	0.0896117	0.354011	0.0670846	0.0752172	0.695535	0.086071	0.517582	0.112248	0.657349	0.0659827
ENSMUSG00000005656	Snx6	NRE	93.2806	36.2628	35.1687	34.4475	27.5856	26.2225	26.8525	77.1058	29.6918	27.8175	28.154	21.3461	20.6462	21.1428
ENSMUSG00000005667	Mthfd2	NRE	2.50894	8.27478	5.3689	12.732	11.8628	10.7643	10.9603	2.31669	7.375	4.58258	11.3153	9.92368	9.21231	9.1619
ENSMUSG00000005672	Kit	TRE+NRE	1.47723	24.6552	26.1449	21.825	41.0077	27.4165	42.668	1.35489	22.375	22.4055	19.5717	34.6087	23.6952	36.4436
ENSMUSG00000005674	Tomm40l	NRE	8.1618	6.83776	8.32517	6.90484	6.72717	6.64054	6.36327	9.36014	7.56516	9.98371	7.57001	7.90133	7.95488	7.828
ENSMUSG00000005677	Nr1i3	TRE	0.414471	1.17206	0.616327	1.41933	1.06166	1.19792	1.1946	0.0181108	0.573982	0.0868523	0.700579	0.395145	0.570279	0.518037
ENSMUSG00000005681	Apoa2	TRE	0.626523	24.5809	0.854496	28.0705	9.14532	35.6063	11.3498	0.611358	19.3471	0.75361	22.4042	7.07234	27.3174	8.46483
ENSMUSG00000005682	Pan2	NRE	16.9315	14.5084	15.6059	14.6295	19.2386	16.0959	19.6381	14.3547	12.2314	12.7064	12.2224	15.5115	13.0698	15.8412
ENSMUSG00000005683	Cs	NRE	63.84	105.456	74.3102	105.042	104.814	111.879	112.283	55.3288	90.2535	61.2548	90.1098	83.4664	89.9442	89.4077
ENSMUSG00000005686	Ampd3	NRE	2.41792	5.60379	10.9297	3.29457	3.03685	2.44717	2.24815	3.17469	6.53725	12.5275	3.78365	3.5331	2.79037	2.8846
ENSMUSG00000005687	Bcas2	TRE+NRE	55.2047	29.3465	29.691	27.9646	30.9419	27.0458	28.6802	44.854	22.8549	22.2931	21.6102	22.7661	19.8146	20.8924
ENSMUSG00000005696	Sh2d1a	TRE	6.70209	0.588449	0.357521	1.06623	0.477918	0.269352	0.505316	6.2535	0.507536	0.294285	1.00081	0.284061	0.210647	0.42315
ENSMUSG00000005698	Ctcf	NRE	31.4886	23.9132	25.9925	20.8228	19.0148	17.3613	18.2372	29.4698	22.2783	22.9971	19.1825	16.6807	15.4435	16.1487
ENSMUSG00000005699	Pard6a	TRE	4.08887	2.96839	2.86958	3.47264	4.195	3.72327	4.34588	4.59396	3.2881	3.06132	3.90043	4.43317	3.94375	4.61495
ENSMUSG00000005705	Agrp	TRE	0.247033	3.43376	0.453407	4.03656	0.607462	2.89164	0.442418	0.186976	2.76306	0.287351	3.19312	0.380616	2.20444	0.329089
ENSMUSG00000005716	Pvalb	NRE	0.0625533	13.0322	9.46165	16.0786	11.0421	15.5031	10.2492	0.0730975	11.9404	8.2926	14.5655	9.27028	13.2294	8.9733
ENSMUSG00000005718	Tfap4	not detected	4.38126	2.72803	5.10584	2.34169	2.76739	1.63111	1.85288	4.01969	2.52844	4.38178	2.10142	2.42324	1.4464	1.61335
ENSMUSG00000005732	Ranbp1	NRE	68.0481	66.318	50.9207	62.23	54.8202	40.5538	44.4555	64.692	62.8791	45.8331	57.7602	46.1308	34.5978	36.6981
ENSMUSG00000005763	Cd247	TRE	6.84778	3.98447	3.51535	4.10448	3.32417	4.00574	3.41657	10.3149	3.84993	1.9007	4.92097	2.52447	5.10946	2.91368
ENSMUSG00000005774	Rfx5	NRE	11.4049	13.3108	9.40629	17.9585	24.9184	18.729	25.6225	16.1284	20.1474	13.0628	25.0427	34.8752	27.0544	35.7883
ENSMUSG00000005779	Psmb4	NRE	458.055	140.371	113.658	135.235	141.72	136.471	140.988	391.932	116.568	89.7123	111.547	114.553	109.835	114.727
ENSMUSG00000005800	Mmp8	TRE	0.0973363	0.90949	0.121808	1.16921	0.0349704	0.685729	0.0509382	0.096096	0.842029	0.097552	1.04964	0.0245542	0.625807	0.0443657
ENSMUSG00000005802	Slc30a4	NRE	11.0349	5.86755	6.76487	5.43063	2.62028	4.12535	2.606	11.0462	5.85754	6.45752	5.3001	2.41088	4.01893	2.49137
ENSMUSG00000005803	Sqrdl	NRE	0.708265	4.35078	5.46699	5.57824	4.09525	6.69276	5.06728	0.946762	6.5782	7.71578	8.23092	6.35714	10.3492	7.45826
ENSMUSG00000005804	Pldn	NRE	11.8249	5.12191	6.93126	5.94359	5.81362	5.51314	6.26903	11.5215	4.89348	6.29938	5.61198	5.15233	5.06338	5.65427
ENSMUSG00000005813	Metap1	NRE	30.1108	20.0429	26.6133	19.7293	19.7152	19.3725	20.9206	26.7174	17.4476	22.1315	16.9457	16.3583	16.0197	17.1041
ENSMUSG00000005823	Gpr108	NRE	21.5053	25.4989	30.0101	28.8958	32.6954	34.4074	35.3703	17.1201	20.4464	22.9428	22.7418	24.5784	26.4944	27.0502
ENSMUSG00000005824	Tnfsf14	TRE	0.0467046	0.960077	0.206652	1.48981	0.176887	1.02506	0.380881	0.0501574	0.902588	0.191495	1.47114	0.164458	0.956967	0.357888
ENSMUSG00000005836	Gata6	NRE	0.0101938	0.452356	0.197121	0.287895	0.134287	0.276211	0.143442	0.00738274	0.439931	0.176494	0.268311	0.112427	0.258392	0.123016
ENSMUSG00000005846	Rsl1d1	NRE	42.5359	32.7505	27.9812	28.5125	22.1035	17.7502	18.9658	38.6268	29.4049	24.1769	25.5674	19.0346	15.6588	16.2161
ENSMUSG00000005864	Cnga2	not detected	0.123973	5.08302	1.00304	7.47775	5.44072	7.89696	5.61411	0.1217	4.87472	0.933185	7.20849	4.92774	7.3406	5.18987
ENSMUSG00000005871	Apc	TRE+NRE	17.722	8.16108	9.94694	6.98122	7.39391	6.76181	7.11303	22.331	10.096	11.7654	8.40139	9.01228	8.28491	8.7439
ENSMUSG00000005873	Reep5	NRE	36.5042	33.4166	78.8545	31.3276	34.799	31.4273	35.1021	33.0601	29.284	68.0653	27.7102	28.9945	26.7074	29.8547
ENSMUSG00000005881	Ergic3	NRE	71.1899	78.0064	85.6579	64.9242	64.4158	73.7255	61.7364	64.3357	69.948	72.5165	58.6885	54.729	62.1212	52.4322
ENSMUSG00000005882	Uqcc	NRE	13.3337	9.94675	10.441	10.6612	10.5481	9.98962	9.64015	24.2254	18.377	18.5611	19.4474	19.3212	18.7246	18.3934
ENSMUSG00000005883	Spo11	TRE	3.71661	3.17803	2.28018	3.77995	4.92454	3.79697	5.3398	3.21702	2.83026	1.83655	3.17166	4.0201	3.15163	4.26392
ENSMUSG00000005886	Ncoa2	TRE+NRE	14.7408	14.5333	11.7354	15.3663	26.6304	19.6944	26.8839	17.2724	17.2971	13.5743	17.6834	30.8841	23.1445	32.3721
ENSMUSG00000005891	Prl4a1	TRE	0	0.380734	0	0.442937	0	0.244777	0	0	0.312331	0	0.372759	0	0.21528	0
ENSMUSG00000005892	Trh	TRE	0.0156835	7.25391	0.0771045	7.74349	0	5.08252	0	0.0154784	6.79164	0.0601967	7.31811	0	4.70639	0
ENSMUSG00000005893	Nr2c2	TRE+NRE	13.0121	10.6761	12.3141	9.48289	10.1928	8.95592	9.96812	11.1826	9.58099	10.5682	8.57206	9.7683	8.32194	9.2359
ENSMUSG00000005897	Nr2c1	NRE	6.76141	3.45871	4.28138	3.57422	3.53976	3.62526	3.87801	9.03599	4.6468	5.38364	4.91963	4.73692	4.96589	5.17067
ENSMUSG00000005899	Smpd4	TRE+NRE	9.52446	6.86932	9.39422	6.34234	5.99677	5.06717	5.19997	12.3976	9.62053	12.0438	8.76555	8.75444	6.95681	7.65467
ENSMUSG00000005907	Pex1	NRE	5.62783	3.91713	4.28959	4.1216	5.04085	3.78065	5.12058	5.70079	3.87503	3.91641	3.6074	5.46017	4.05279	5.58243
ENSMUSG00000005917	Otx1	TRE	0.025561	0.114419	0.0454931	0.151891	0.0774203	0.150851	0.107748	0.0165227	0.100929	0.0373723	0.155176	0.0680662	0.137523	0.117264
ENSMUSG00000005936	Kctd20	NRE	21.3766	15.5189	20.0128	13.7406	13.8817	14.4279	14.1919	27.4988	21.7013	26.3462	18.8963	18.654	20.1105	19.5652
ENSMUSG00000005947	Itgae	TRE	0.139779	1.55147	0.594012	1.62495	0.115475	0.919257	0.139411	0.136299	1.45172	0.545595	1.5467	0.112292	0.82982	0.14155
ENSMUSG00000005949	Ctns	NRE	6.92226	4.09523	7.05102	4.25224	3.81205	4.87725	4.19518	6.46564	3.8019	6.17909	3.83345	3.16297	4.12724	3.47737
ENSMUSG00000005950	P2rx5	TRE	0.203918	5.0568	2.83379	5.16949	3.6653	5.03914	4.15056	0.178048	4.31195	2.29997	4.39551	3.06943	4.21929	3.40926
ENSMUSG00000005951	Shpk	TRE	2.38086	1.6836	2.65641	2.33128	2.01625	2.43804	2.31886	2.30862	1.6153	2.4255	2.21909	1.78762	2.20279	2.07585
ENSMUSG00000005952	Trpv1	TRE	0.0304859	0.307371	0.0779362	0.40282	0.0200801	0.237901	0.0311989	0.039797	0.343004	0.0670437	0.423614	0.0204683	0.241006	0.0330638
ENSMUSG00000005958	Ephb3	NRE	0.989783	9.25944	11.6497	7.73221	12.1376	10.0634	12.0587	0.886888	8.33755	9.97531	6.90947	10.286	8.67982	10.3322
ENSMUSG00000005968	Tuft1	NRE	13.0673	8.77304	9.42452	8.53873	7.38482	9.85902	8.26574	11.3777	7.74274	7.95646	7.61305	6.13952	8.35505	7.28424
ENSMUSG00000005973	Rcn1	NRE	132.655	30.8674	49.743	17.0119	12.9041	12.6667	9.1825	122.425	28.2454	43.6211	15.5062	11.0122	11.1677	7.94532
ENSMUSG00000005980	Dnase1	TRE	1.82802	3.17021	2.08047	3.13598	1.83928	3.17473	1.78607	1.41037	3.15352	1.57316	3.10304	1.28592	3.14229	1.08299
ENSMUSG00000005981	Trap1	NRE	51.6204	36.0368	33.0484	36.3816	41.7074	33.2853	39.2442	43.2599	30.1191	26.1739	29.8127	32.5994	26.309	30.9471
ENSMUSG00000005982	Nat15	NRE	10.5304	8.50508	9.2798	10.0757	10.7605	9.58625	11.0482	20.6875	17.7768	16.2027	19.7767	18.5838	18.7691	19.4041
ENSMUSG00000005983	1700037C18Rik	TRE	4.07681	3.93722	5.04133	4.88712	4.97599	5.09693	5.0233	4.73247	4.64671	5.84931	5.45626	5.62045	5.96916	5.62124
ENSMUSG00000005986	Ankrd13d	TRE	1.72857	1.38937	2.8161	1.71285	1.44907	2.36247	1.3877	1.61884	1.30199	2.24569	1.3376	1.27244	2.12997	1.186
ENSMUSG00000005994	Tyrp1	TRE	0.0191885	0.597302	0.00377343	0.685148	0	0.490814	0	0.0212403	0.861851	0.0201165	0.87797	0	0.459262	0
ENSMUSG00000006005	Tpr	NRE	44.2431	42.1752	34.0661	39.0405	38.8205	34.0641	37.4101	67.04	62.1695	49.8377	63.8334	52.6808	54.4619	52.5892
ENSMUSG00000006007	Pdc	TRE	0.00871027	0.528628	0	0.790705	0.0114744	0.387062	0.0111424	0	0.502789	0	0.74545	0.009884	0.364268	0.0110631
ENSMUSG00000006010	BC003331	NRE	12.5767	10.3248	9.9231	11.6182	11.773	10.7263	11.7363	12.4551	10.3813	9.52644	11.7447	11.1383	10.3424	11.3531
ENSMUSG00000006014	Prg4	TRE	1.21716	26.6462	1.23168	29.0937	2.72913	25.0774	2.90645	0.303079	40.8783	0.742782	43.5243	2.72392	39.4796	3.24677
ENSMUSG00000006019	Dhx34	TRE	6.17637	5.92734	6.96983	5.9349	6.49749	6.69817	6.64442	6.34628	5.93571	6.69493	5.94212	6.24458	6.50445	6.44703
ENSMUSG00000006021	Kptn	NRE	8.1231	8.0297	10.213	9.97307	12.3498	10.8825	12.9466	6.5401	6.44063	7.52937	7.69678	9.58151	8.35331	9.94672
ENSMUSG00000006024	Napa	NRE	55.3257	50.9238	50.1808	51.0898	66.0209	59.2491	65.2392	46.3001	41.9912	40.1264	42.4045	51.7022	47.2757	51.5517
ENSMUSG00000006050	Sra1	NRE	19.2679	15.1037	16.839	16.4061	14.8958	16.119	16.2215	41.8185	32.0418	33.7699	33.6938	30.159	32.0943	32.9191
ENSMUSG00000006056	Calcoco2	not detected	0.0809516	3.00163	0.309914	3.28372	0.158758	1.42229	0.172687	0.0798819	2.59415	0.24977	2.87435	0.129355	1.21042	0.139545
ENSMUSG00000006057	Atp5g1	NRE	18.2148	14.2433	12.3987	15.6981	14.3952	15.1628	14.8172	98.7637	82.6999	68.0265	91.2027	76.6101	81.3596	79.99
ENSMUSG00000006058	Snf8	NRE	35.8235	39.9976	36.2015	40.233	49.2707	46.829	48.9932	29.737	33.1863	28.1777	32.5577	37.8852	35.921	38.2791
ENSMUSG00000006095	Tbcb	NRE	33.2258	41.1819	33.7999	42.7284	51.2614	49.6102	51.7886	29.2449	35.5484	27.7541	36.5333	42.0252	41.2551	43.0473
ENSMUSG00000006127	Inpp5k	TRE+NRE	23.3898	12.8108	17.9401	12.8486	14.9824	14.4315	15.2068	25.3282	13.7908	18.3614	14.1942	15.2166	14.8391	15.038
ENSMUSG00000006134	Crkl	NRE	15.7007	8.78388	9.50482	7.3187	7.61485	7.47399	7.46107	15.7879	8.74444	9.05817	7.1797	7.17681	7.19567	7.03946
ENSMUSG00000006143	2310043J07Rik	TRE	0.523737	4.32923	0.820133	3.47287	0.932694	2.49134	0.607946	0.524172	3.95859	0.749477	3.09837	0.882972	2.30408	0.589755
ENSMUSG00000006154	Eps8l1	TRE+NRE	0.971365	1.44506	5.23134	1.24407	0.618312	1.58753	0.896343	1.23854	2.03594	7.58106	1.95819	0.88006	2.31707	0.990672
ENSMUSG00000006169	Clint1	NRE	44.5978	65.2999	41.5912	53.2888	70.0534	63.1806	70.3995	41.8342	61.1924	37.2593	49.1372	61.5512	56.0802	61.847
ENSMUSG00000006179	Prss16	NRE	3169.97	23.2813	13.954	32.3828	18.3164	13.8236	18.2382	2755.08	20.1133	11.4105	27.5444	14.6752	11.5269	14.9303
ENSMUSG00000006191	Cdkal1	TRE+NRE	4.38553	6.62117	8.11214	8.02724	9.26491	8.29261	9.55815	8.08529	11.6191	14.0432	15.1534	15.9516	14.3951	16.2277
ENSMUSG00000006200	Rhox6	TRE	0.0214911	1.24645	0.026414	1.59326	0.127399	1.13553	0.0274921	0.023347	0.937153	0.020712	1.21082	0.0920908	0.794389	0.0269054
ENSMUSG00000006204	5430419D17Rik	TRE	0.0148265	2.63416	0.00364456	3.34986	0.0341801	2.66754	0.0189665	0.0157383	2.02663	0.00363443	2.66484	0.0179661	2.04136	0.0138989
ENSMUSG00000006205	Htra1	NRE	4.7751	37.0503	112.746	21.9367	29.3576	23.0935	25.1549	4.2828	32.8661	95.3097	19.2693	24.5765	19.9954	21.3076
ENSMUSG00000006215	Zbtb17	NRE	10.6217	14.8428	15.164	15.0489	21.1094	17.4974	21.677	9.11822	12.7345	12.2609	12.8074	17.1202	14.3596	17.7244
ENSMUSG00000006216	Clcnkb	TRE	0.0196138	1.58502	0.186426	1.69699	0.318669	1.90143	0.262058	0.0140135	1.53597	0.182703	1.63679	0.241562	1.92878	0.362876
ENSMUSG00000006218	Fam131c	not detected	0	1.82375	0.126596	2.66606	0.568689	1.78126	0.581305	0	1.61021	0.102187	2.27739	0.472976	1.45236	0.512101
ENSMUSG00000006219	Fblim1	NRE	1.38744	4.1174	6.44617	3.9614	3.39264	4.84824	4.1496	1.76924	5.55474	9.23197	5.33638	4.25331	6.72997	6.53695
ENSMUSG00000006221	Hspb7	TRE	0.089006	1.10089	0.264346	1.20165	0.371839	1.30823	0.391703	0.00812613	0.993736	0.184236	1.10336	0.235962	1.0964	0.24013
ENSMUSG00000006235	Epor	TRE	0.035603	1.13265	0.0758482	0.628443	0.0938024	0.514506	0.174587	0.0369075	1.04824	0.0682265	0.578912	0.0837852	0.438594	0.149006
ENSMUSG00000006241	Ccdc159	TRE	2.12143	2.08349	4.10274	3.00419	6.56091	3.9971	6.82043	1.60827	1.60631	2.89852	2.30174	4.56369	2.85623	4.86921
ENSMUSG00000006262	Mob1b	NRE	18.0337	10.5168	8.87723	10.2297	7.56923	8.96786	8.29791	19.1559	11.0364	8.92927	10.7141	7.58225	9.15911	8.41157
ENSMUSG00000006269	Atp6v1b1	TRE	0.0394449	5.15741	1.27989	5.76331	0.148464	4.65386	0.122544	0.035609	4.09118	0.969923	4.62681	0.106878	3.54396	0.0914031
ENSMUSG00000006270	Vax1	not detected	0.0109559	0.300144	0.0388114	0.185669	0.0366928	0.0870333	0.0553135	0	0.442202	0.0292098	0.230453	0.0132811	0.116018	0.0384438
ENSMUSG00000006273	Atp6v1b2	NRE	48.7712	53.0885	29.8909	66.7198	56.9149	70.3775	66.0019	42.2153	45.3244	24.4342	56.646	45.5468	57.6164	53.4041
ENSMUSG00000006276	Eps15l1	NRE	30.6438	19.4295	24.0741	18.3176	22.9934	20.1063	22.0142	28.2089	17.6201	20.9616	16.4774	20.8021	18.5819	19.7531
ENSMUSG00000006281	Tep1	NRE	5.21922	9.70155	9.92918	13.5791	15.2055	17.6976	16.394	4.31714	7.90833	7.73547	10.9586	11.617	13.9758	12.7256
ENSMUSG00000006288	Ttc5	NRE	17.8152	14.8016	19.2442	15.8346	17.0074	15.8649	16.3344	15.3329	12.6807	15.8251	13.4433	13.6421	12.8232	13.2037
ENSMUSG00000006289	Osgep	NRE	9.52311	10.4691	12.1253	11.2503	12.547	11.5497	11.4276	18.5121	17.2571	17.8949	16.8214	16.7879	15.2535	14.3711
ENSMUSG00000006299	Aamp	NRE	139.286	62.2445	57.5834	56.89	59.4894	60.4863	60.035	115.964	50.7694	44.3508	45.721	47.1534	47.962	47.4346
ENSMUSG00000006301	Tmbim1	NRE	3.09215	3.0416	4.19587	3.07112	3.26221	4.07166	3.7493	12.1002	13.0843	15.6387	11.8455	11.8458	15.7541	13.4802
ENSMUSG00000006304	Arpc2	NRE	155.862	89.5969	88.029	81.7538	67.1499	68.7283	68.187	159.694	90.9915	85.9106	82.4819	65.127	68.1911	66.5132
ENSMUSG00000006307	Wbp7	TRE+NRE	9.24155	9.5314	14.083	9.52834	13.0732	12.0361	12.9594	8.13876	8.26358	11.6976	8.20632	10.8011	10.0386	10.7754
ENSMUSG00000006310	Zbtb32	TRE	0.122205	0.968381	0.577907	1.36763	1.97782	1.87323	2.48637	0.0999438	1.16409	0.613694	1.47007	1.93335	1.91068	2.2517
ENSMUSG00000006311	Etv2	not detected	0.0197867	1.46233	0.0194554	1.57667	0.27369	1.21167	0.265773	0.0214706	1.33381	0.0199607	1.38472	0.276447	0.993361	0.246019
ENSMUSG00000006313	Upk1a	TRE	0.207435	7.54544	0.440557	10.4112	8.58042	8.87613	8.23669	0.206434	6.13387	0.31875	8.54536	6.82725	7.00543	6.34638
ENSMUSG00000006315	Tmem147	NRE	34.447	55.5542	48.5247	63.3355	67.3839	65.0212	67.2102	27.8581	44.5454	37.7646	51.0341	50.3511	50.1443	51.8355
ENSMUSG00000006333	Rps9	NRE	282.084	334.123	293.947	290.405	335.64	271.415	326.299	611.944	735.524	635.928	649.107	674.954	548.415	649.143
ENSMUSG00000006335	Tfpt	NRE	10.853	8.65568	9.52726	8.16791	9.76025	10.3606	9.79941	9.99519	7.65879	8.34228	7.36936	8.34807	8.795	8.4301
ENSMUSG00000006342	Susd2	NRE	3.12419	37.0541	18.1952	38.188	25.7874	45.2953	29.4262	2.92477	33.7415	15.5936	34.0314	22.2871	39.8214	25.1973
ENSMUSG00000006344	Ggt5	TRE	21.6732	22.792	44.8115	20.7451	31.3467	21.1499	28.3045	30.8586	31.9097	59.6154	28.4931	43.245	29.417	39.2847
ENSMUSG00000006345	Ggt1	TRE	0.254367	3.0286	0.362901	3.9441	0.857429	3.1065	0.727352	0.767235	6.35002	0.849823	9.84317	1.79093	6.15582	1.76846
ENSMUSG00000006356	Crip2	NRE	101.967	36.7653	81.6942	32.4064	44.8014	33.9135	34.3464	90.5738	32.3245	67.9449	28.2382	37.6597	28.1543	28.9744
ENSMUSG00000006360	Crip1	NRE	41.0706	145.414	243.089	284.57	183.42	336.947	215.522	30.2749	103.951	168.675	203.926	122.784	234.062	144.953
ENSMUSG00000006362	Cbfa2t3	NRE	3.0633	11.8188	10.6181	12.389	23.549	17.1012	22.9935	3.42113	12.8766	11.3146	13.4014	24.8626	18.2718	23.9946
ENSMUSG00000006369	Fbln1	TRE+NRE	12.0151	7.76568	13.2193	3.9836	2.68157	2.14314	0.883803	15.8117	10.1194	16.0652	5.27123	3.42301	2.75947	1.04313
ENSMUSG00000006373	Pgrmc1	NRE	84.7083	144.899	102.776	177.997	136.095	157.418	150.849	83.4382	141.102	96.6657	173.656	124.721	146.613	140.217
ENSMUSG00000006378	Gcat	TRE	25.0146	11.5699	3.64945	13.5223	13.1684	12.6762	14.0385	36.4563	16.5375	5.16379	19.3462	18.8754	18.3526	19.7157
ENSMUSG00000006386	Tek	TRE	0.182345	2.43112	7.86841	2.90318	2.93725	3.48484	3.70561	0.172669	2.18839	6.87954	2.62091	2.51556	3.13753	3.19703
ENSMUSG00000006389	Mpl	TRE	0.00733806	0.172393	0.0252532	0.253503	0.0483335	0.210762	0.0469354	0.0132283	0.159064	0.0251393	0.227501	0.0413127	0.167015	0.0491645
ENSMUSG00000006390	Elovl1	NRE	9.27061	16.3926	17.8294	17.4214	14.2308	16.6959	13.0752	12.2058	21.784	22.7209	22.8195	17.8287	21.6863	16.5063
ENSMUSG00000006392	Med8	NRE	16.7897	18.3912	18.9804	18.4414	17.2482	17.4283	18.4694	25.7406	28.0724	27.8631	28.5963	28.55	29.5884	29.2744
ENSMUSG00000006395	Hyi	TRE	10.8085	4.755	6.13532	5.06551	6.46483	5.52018	6.612	12.5114	5.42955	6.64564	5.62878	7.01128	6.01718	7.23407
ENSMUSG00000006398	Cdc20	NRE	22.4566	24.3937	12.4151	26.3262	23.0443	15.4367	15.5715	20.1529	20.9717	10.4087	22.4413	19.2697	12.9108	12.784
ENSMUSG00000006403	Adamts4	TRE	2.1689	2.02664	0.766468	2.48471	3.40884	2.71146	3.23534	2.29693	2.1123	0.768525	2.57288	3.37251	2.70921	3.17096
ENSMUSG00000006411	Pvrl4	TRE	0.22291	9.32422	7.26659	10.2358	9.29338	15.3167	12.0842	0.240363	10.2131	7.55121	11.0988	9.50288	16.3559	12.6466
ENSMUSG00000006412	Pfdn2	NRE	26.0328	19.9891	19.3582	18.1752	19.8929	20.0519	18.5266	35.1728	26.9778	24.8559	24.6837	25.9528	25.5706	24.9704
ENSMUSG00000006418	Rnf114	NRE	33.0344	34.3435	31.2061	34.191	53.0218	40.6654	56.5268	41.8509	42.5563	37.2091	42.2475	63.1638	48.711	67.7405
ENSMUSG00000006423	C330007P06Rik	NRE	8.806	6.27022	7.66465	6.1231	5.9603	5.09448	5.96135	8.06936	5.68274	6.70646	5.53801	5.04988	4.4104	4.93481
ENSMUSG00000006435	Neurl1a	TRE	0.0688923	3.62955	8.44072	2.78946	2.01604	3.77874	2.3008	0.0735318	4.07176	9.32108	3.14602	2.17591	4.09683	2.46342
ENSMUSG00000006442	Srm	NRE	38.8939	17.8967	15.7517	19.1202	20.5159	14.1454	15.7097	34.3369	15.6756	12.9524	16.4314	17.0311	11.8275	12.9181
ENSMUSG00000006445	Epha2	TRE	0.249622	14.9107	3.458	16.0552	17.5416	21.7853	19.8513	0.21164	13.065	2.88457	14.0005	14.5893	18.255	16.6345
ENSMUSG00000006456	Rbm14	TRE+NRE	12.4369	12.168	10.6504	12.0958	15.8082	12.7091	15.2132	27.4239	26.7597	22.5799	26.6834	34.778	28.186	33.9162
ENSMUSG00000006457	Actn3	TRE	79.0394	146.67	60.1703	179.485	272.102	185.112	257.908	66.3593	120.629	47.5039	147.146	214.716	147.977	204.312
ENSMUSG00000006463	Zdhhc24	NRE	6.69551	9.9396	5.54551	11.9394	18.1003	13.0938	18.4399	6.72388	9.87748	5.30458	11.8975	16.9621	12.534	17.4993
ENSMUSG00000006464	Bbs1	TRE	3.90512	2.44333	2.93384	2.42904	1.92945	2.30295	1.82546	3.62089	2.25778	2.57498	2.25181	1.64283	1.98549	1.62567
ENSMUSG00000006469	Slc34a3	TRE	0	0.355259	0.014665	0.356037	0.0654927	0.490345	0.069958	0	0.267122	0.0142907	0.295248	0.0499418	0.40501	0.0684952
ENSMUSG00000006471	Ndor1	NRE	6.02527	5.22345	9.33603	5.3013	6.62032	5.59034	6.49852	8.03523	6.95058	11.9288	6.7974	9.18452	7.29968	9.0266
ENSMUSG00000006476	Nelf	TRE+NRE	13.7474	9.45478	14.4264	10.2455	8.80556	11.5104	9.92942	15.293	10.9948	15.8379	10.9482	9.1484	12.166	10.4487
ENSMUSG00000006488	Prl7a1	TRE	0	0.185105	0	0.163488	0	0.0146396	0	0	0.284857	0	0.194188	0	0.0254466	0
ENSMUSG00000006490	Prl8a9	TRE	0	0.321235	0.0460962	0.21279	0.0308792	0.190544	0.0599719	0	0.270592	0.0332964	0.181333	0.0131727	0.150707	0.0438062
ENSMUSG00000006494	Pdk1	NRE	20.1112	6.94185	5.43105	5.42114	5.92215	4.94558	6.0709	18.9311	6.42353	4.85324	4.99178	5.19889	4.43344	5.34062
ENSMUSG00000006498	Ptbp1	NRE	101.888	89.6351	84.0148	84.879	88.3312	75.3612	82.6789	165.526	142.787	125.776	134.715	146.54	121.224	136.01
ENSMUSG00000006517	Mvd	NRE	3.59301	18.9429	4.12065	14.9875	18.0804	18.8968	19.0001	3.24436	16.4567	3.45636	12.8314	14.6619	15.6076	15.4303
ENSMUSG00000006519	Cyba	NRE	6.28557	396.189	72.207	484.017	571.184	593.219	641.828	5.32619	312.022	55.5328	383.161	429.893	456.517	478.354
ENSMUSG00000006522	Itih3	TRE	0.0211973	6.32512	0.0277897	7.76295	0.0651558	5.73786	0.0723098	0.0219437	6.34102	0.081467	7.82586	0.104074	5.93036	0.139397
ENSMUSG00000006526	Tmem110	TRE	8.24926	4.23076	4.3774	4.19454	3.98676	4.21966	4.02534	7.56705	3.72302	3.75152	3.65251	3.38141	3.63885	3.49247
ENSMUSG00000006527	Sfmbt1	TRE+NRE	6.534	4.03111	3.00178	3.63385	3.83715	3.33034	3.55371	10.396	6.48096	4.52757	5.87749	5.93626	5.28126	5.56216
ENSMUSG00000006529	Itih1	TRE	0.00351343	2.79952	0.169275	4.96844	6.90554	6.05471	7.1867	0.003481	2.33098	0.133104	3.98039	5.41486	4.80437	5.79225
ENSMUSG00000006538	Ihh	TRE	0.0440105	1.50352	0.778924	2.39713	0.318872	2.11312	0.472917	0.0399666	1.44159	0.735921	2.33448	0.289072	1.96704	0.429819
ENSMUSG00000006542	Prkag3	TRE	0	0.251579	0.673881	0.673094	1.95419	1.09956	1.98995	0	0.236173	0.539115	0.575344	1.72263	0.961622	1.75461
ENSMUSG00000006546	Cryba2	TRE	0.180883	6.62507	7.63291	8.69669	1.01271	7.61321	1.3305	0.172634	5.46476	5.92657	7.17855	0.763452	6.05662	1.05532
ENSMUSG00000006567	Atp7b	TRE	13.9162	0.69736	0.159126	1.17631	0.151652	0.830003	0.192085	13.1105	0.670189	0.138125	1.13518	0.130212	0.77167	0.181251
ENSMUSG00000006570	Defb2	TRE	0	0.487646	0	0.511452	0	0.224973	0	0	0.430371	0	0.437017	0	0.152519	0
ENSMUSG00000006574	Slc4a1	TRE	0.0127355	2.85403	0.0943861	2.4206	0.0445636	1.78104	0.0343651	0.0124957	2.53862	0.0896317	2.18	0.0327111	1.57114	0.0298948
ENSMUSG00000006575	Rundc3a	TRE	0.539085	3.39732	5.55685	3.9433	2.4474	4.49076	2.96079	0.57813	3.43695	5.37936	3.97977	2.35745	4.42152	2.91444
ENSMUSG00000006576	Slc4a3	TRE+NRE	2.6719	3.31352	5.35846	3.8636	1.96871	3.72465	2.16698	4.29114	5.26729	8.57736	6.49476	3.04862	5.94248	3.62093
ENSMUSG00000006585	Cdt1	NRE	6.91637	7.47397	7.52692	5.48094	5.79328	3.84215	3.74835	6.26157	6.60577	6.52379	4.86257	4.91261	3.30946	3.12847
ENSMUSG00000006586	Runx1t1	TRE+NRE	0.102579	0.62614	0.574053	0.734759	0.6968	0.782254	0.657841	0.107299	0.73211	0.602415	0.863594	0.729449	0.948636	0.752576
ENSMUSG00000006587	Snai3	not detected	0.594217	0.969439	0.570835	1.0196	0.728799	0.621827	0.550447	0.602846	0.953487	0.533065	0.995858	0.644374	0.570549	0.521557
ENSMUSG00000006589	Aprt	NRE	21.9942	18.1437	19.3216	20.655	15.7334	21.1352	14.7492	19.01	15.6711	15.9356	17.9393	12.7214	17.6189	12.084
ENSMUSG00000006599	Gtf2h1	NRE	17.4456	12.2281	10.9664	11.7799	10.1081	9.77152	9.66678	16.9413	11.8423	10.0715	11.4189	9.65773	9.85416	9.01699
ENSMUSG00000006611	Hfe	TRE+NRE	0.884955	4.37942	2.1693	5.36806	6.27419	7.15365	7.22476	0.991106	4.7858	1.97339	6.13867	7.29799	7.80733	9.1706
ENSMUSG00000006641	Slc5a6	TRE	5.26092	3.77252	2.81393	4.15469	3.83804	4.43717	4.10007	5.70475	4.69965	2.84693	5.3444	5.15235	5.78103	5.84105
ENSMUSG00000006642	Tcf23	TRE	0.00330803	0.771557	0.0439757	0.899751	0.059515	0.695419	0.075325	0.00287497	0.781047	0.0355292	0.893965	0.0552135	0.660818	0.0696241
ENSMUSG00000006649	Nphs1	TRE	0.120934	2.16737	0.470251	3.02418	0.953222	2.92896	0.810093	0.0583628	1.65724	0.299701	2.39842	0.695373	2.42107	0.62201
ENSMUSG00000006651	Aplp1	TRE	0.3665	17.5746	16.5992	22.9196	27.8699	35.9491	36.3526	0.311619	14.6761	13.1825	19.1105	22.2539	28.8767	29.2583
ENSMUSG00000006673	Qrich1	NRE	25.4539	19.9993	20.3046	19.0545	19.3576	18.0117	19.6648	24.3748	19.0088	18.4275	18.0679	17.4583	16.5113	17.9337
ENSMUSG00000006675	P4htm	TRE+NRE	0.203868	1.50845	2.07529	2.00794	2.13271	2.42407	2.43153	0.181749	1.37377	1.69368	1.68585	1.84367	2.03032	2.03371
ENSMUSG00000006676	Usp19	NRE	37.5035	28.6587	38.4756	28.3415	39.78	37.0072	40.1639	34.8397	26.3872	34.0718	26.0345	34.9633	32.8105	35.2744
ENSMUSG00000006678	Pola1	NRE	7.5703	6.08886	4.27569	4.83456	4.46081	2.41155	3.03847	6.25824	5.12649	3.36304	3.97537	3.4204	1.91196	2.41508
ENSMUSG00000006699	Cdc42	TRE+NRE	125.439	102.217	79.3616	108.768	90.564	89.0823	93.5427	165.808	134.252	99.3151	140.243	111.701	112.087	117.315
ENSMUSG00000006705	Pknox1	NRE	6.72031	5.46647	4.77644	5.79722	5.40799	5.23447	5.4842	7.88257	6.44316	5.35003	6.65585	6.10487	6.11703	6.06905
ENSMUSG00000006711	D130043K22Rik	TRE	0.24902	0.821338	0.23578	1.25672	1.69689	1.54207	1.60255	0.215031	0.722989	0.200506	1.08145	1.39863	1.32095	1.31924
ENSMUSG00000006715	Gmnn	NRE	7.10445	10.8485	5.82002	10.506	10.2178	7.82855	8.21637	9.09413	13.8701	7.09691	13.4273	12.5227	9.45793	9.92606
ENSMUSG00000006717	Acot13	NRE	23.9488	28.0401	18.634	33.2506	45.4492	37.3443	50.8163	21.821	25.8177	16.3522	29.8481	38.707	32.7425	44.0034
ENSMUSG00000006720	Zfp184	TRE	1.48019	1.51833	1.9032	0.994194	1.27959	0.845503	1.19778	1.70585	1.71582	2.11148	1.09691	1.41005	1.04013	1.40073
ENSMUSG00000006724	Cyp27b1	not detected	0.155043	1.18289	0.152447	1.70642	0.192229	0.998363	0.30917	0.140908	1.05941	0.113652	1.52556	0.152799	0.879215	0.285225
ENSMUSG00000006728	Cdk4	NRE	96.3196	59.5015	76.0174	51.1457	50.7326	35.4834	37.4358	161.305	90.7522	114.856	73.7661	76.8968	48.3492	56.2378
ENSMUSG00000006731	B4galnt1	NRE	19.699	75.1339	52.1389	92.4961	80.8272	124.598	98.9942	17.4636	64.3714	43.3576	79.0461	66.575	104.214	82.3717
ENSMUSG00000006732	Mettl1	TRE+NRE	5.5186	4.686	5.46024	4.95374	3.8846	3.2263	3.04989	6.73904	5.85817	5.87533	5.94205	4.58474	4.05432	3.49093
ENSMUSG00000006736	Tspan31	NRE	30.4927	39.0889	35.3199	41.2427	32.8645	38.2909	31.0079	20.7159	28.5626	23.7305	30.5923	23.5615	30.0078	23.4883
ENSMUSG00000006740	Kif5b	NRE	47.4201	46.858	45.604	44.2125	41.7352	42.439	42.4694	42.0477	40.9722	39.0643	39.6922	35.0982	35.2604	35.9013
ENSMUSG00000006763	Saal1	TRE+NRE	3.75769	3.13453	2.76148	2.893	2.4161	2.38219	2.08781	3.2038	2.69929	2.2884	2.51541	1.91794	1.92838	1.69822
ENSMUSG00000006764	Tph2	not detected	0.0371961	1.38764	0.0243822	1.60076	0	0.864523	0.00528693	0.0355075	1.26009	0.0238984	1.47349	0	0.748315	0.00514909
ENSMUSG00000006777	Krt23	TRE	0.353676	28.7485	19.3856	26.2655	8.3133	30.3505	12.7568	0.299227	25.2392	16.4993	22.8298	6.68378	25.441	10.5343
ENSMUSG00000006782	Cnp	TRE+NRE	14.0071	92.6611	30.5605	111.071	162.739	127.583	181.681	13.5563	87.8917	27.9511	105.341	148.899	118.298	167.749
ENSMUSG00000006784	Ttc25	TRE	0.643212	2.37845	8.53268	2.38494	1.59695	2.34255	1.98014	0.650549	2.35468	8.41835	2.40416	1.54468	2.22846	1.90239
ENSMUSG00000006800	Sulf2	NRE	15.8349	13.1722	7.56685	15.509	16.6571	21.7682	17.8885	16.4833	13.7738	7.365	16.0571	16.4093	22.0764	17.8918
ENSMUSG00000006818	Sod2	NRE	25.1138	20.1392	13.8529	23.1284	23.0361	25.8198	25.0097	23.0157	18.0067	11.9739	20.7497	19.3428	22.2849	21.1169
ENSMUSG00000006850	Tmco6	TRE	4.71272	5.08091	6.77158	5.21136	4.83912	5.85231	4.95129	4.06772	4.17634	5.27439	4.2907	3.67732	4.67909	3.94561
ENSMUSG00000006906	Stambp	NRE	7.04328	13.0336	11.2741	13.1095	12.4712	12.1756	12.9863	6.35539	11.5091	9.64014	11.5575	10.4025	10.4316	10.9482
ENSMUSG00000006920	Ezh1	NRE	9.53621	6.24477	12.3804	6.64175	7.32564	8.26072	7.75871	12.4102	8.03063	15.2004	8.52795	8.95283	10.3295	9.6918
ENSMUSG00000006930	Hap1	TRE	1.36129	14.2643	33.7363	16.962	18.0576	17.7922	19.9821	1.85257	17.9806	41.323	21.5364	22.07	21.2963	24.3632
ENSMUSG00000006931	Leprel4	NRE	9.86636	2.35839	5.96522	1.32187	0.833666	1.47441	0.573698	12.1764	2.73887	7.1592	1.68156	1.18648	1.87298	0.971456
ENSMUSG00000006932	Ctnnb1	NRE	224.191	157.595	154.266	152.501	140.705	163.299	141.42	269.359	185.936	187.848	184.553	185.558	212.725	182.399
ENSMUSG00000006941	Eif1b	NRE	40.8141	20.4017	29.1976	19.3152	16.6825	13.6485	16.4952	36.1524	18.0977	24.685	17.1825	14.0567	11.7294	13.8875
ENSMUSG00000006948	Klk4	not detected	0.0782041	21.1283	0.33321	30.4129	4.40702	21.096	6.0247	0.0737898	19.6953	0.308538	28.6351	3.84132	18.7879	5.29787
ENSMUSG00000006958	Chrd	not detected	2.64965	1.90341	4.08904	0.906272	0.264794	0.97535	0.206546	2.70777	1.93834	3.85337	0.944788	0.274415	1.02091	0.205395
ENSMUSG00000006998	Psmd2	NRE	169.407	106.167	87.9271	96.5606	106.417	98.4412	103.519	142.433	88.0873	69.9126	79.1077	84.1612	79.417	80.5508
ENSMUSG00000007021	Syngr3	TRE	0.0110463	0.0702841	0.108613	0.12256	0.0582068	0.149655	0.0423923	0.0109018	0.0717874	0.0959979	0.113878	0.0535418	0.148014	0.0414208
ENSMUSG00000007029	Vars	NRE	206.49	238.23	88.4687	224.904	242.099	254.519	245.511	315.052	357.541	129.047	340.834	340.867	365.874	352.524
ENSMUSG00000007030	D17H6S56E-3	not detected	0.882355	3.51523	0.992294	3.55316	3.10882	5.29259	3.44788	0.658537	2.63012	0.769165	2.76019	2.43905	3.93866	2.71011
ENSMUSG00000007033	Hspa1l	TRE	9.81491	11.3422	54.9779	27.0769	25.9455	33.0818	22.2658	0.595797	0.67391	1.15614	0.912293	0.67046	0.616119	0.609475
ENSMUSG00000007034	Slc44a4	TRE	0.0780167	3.6869	4.48755	3.50615	1.63297	4.66476	2.25108	0.0668005	3.02368	3.68812	2.98072	1.29315	3.80598	1.84456
ENSMUSG00000007035	Msh5	not detected	0.741775	2.89151	0.609416	3.27625	0.920709	2.99432	1.0206	0.866769	3.66156	0.616127	4.21003	1.07636	3.67573	1.21225
ENSMUSG00000007036	Abhd16a	NRE	35.6144	27.5051	36.6386	31.0567	38.0376	38.1432	43.6726	37.0161	28.0561	37.6492	33.7514	39.8674	38.6088	44.2983
ENSMUSG00000007038	Neu1	TRE+NRE	4.80795	6.49704	6.10341	7.32742	6.75556	8.48222	7.88452	4.62215	6.08361	5.50584	6.86436	6.00957	7.72903	7.12203
ENSMUSG00000007039	Ddah2	NRE	12.1597	9.98416	18.0127	6.8537	6.68471	6.05848	5.77628	12.3715	10.7361	17.3956	6.92959	6.2103	5.99947	5.57325
ENSMUSG00000007041	Clic1	TRE+NRE	78.4362	71.1774	81.3811	68.9519	71.2707	72.3506	72.9309	69.2361	61.3454	67.166	58.9913	58.1709	60.6556	59.762
ENSMUSG00000007044	Ly6g6c	TRE	0.17227	0	0.169385	0.34752	0	0.373425	1.32224	0	4.01318	4.74624	3.30528	2.63471	8.72066	4.13863
ENSMUSG00000007050	Lsm2	TRE	18.2091	15.4274	15.3327	16.6574	15.7939	12.5697	11.8285	20.4899	17.5534	16.2253	18.1236	16.5653	13.3007	12.5638
ENSMUSG00000007080	Pole	NRE	2.98117	5.81492	2.39503	5.07305	3.29739	3.54329	2.02931	3.4739	7.72176	2.52912	7.5755	3.67034	5.33873	2.43677
ENSMUSG00000007097	Atp1a2	TRE+NRE	0.28165	13.0831	41.8314	24.0399	35.0287	38.6409	42.8389	0.290349	15.2559	47.0097	28.113	42.6417	47.0284	52.9288
ENSMUSG00000007107	Atp1a4	TRE	0.00781916	0.782236	1.39977	1.30605	1.87469	1.86387	2.21522	0.00308675	0.356151	0.293277	0.49424	0.665949	0.606501	0.779038
ENSMUSG00000007122	Casq1	TRE	0.220071	1.13947	1.00221	1.10988	0.656108	1.06079	0.726031	0.186973	0.948184	0.792365	0.962703	0.539868	0.899699	0.594531
ENSMUSG00000007207	Stx1a	TRE	0.87848	1.74441	1.90029	1.89368	2.90305	2.70405	2.79982	0.753803	1.5066	1.61691	1.60977	2.40535	2.25978	2.38728
ENSMUSG00000007209	Ceacam9	not detected	0.0157977	4.77835	0.0931988	5.64872	0	2.96213	0	0.015591	4.58291	0.0753297	5.44358	0	2.73475	0
ENSMUSG00000007216	Zfp775	NRE	1.50714	1.06159	1.50804	1.0483	1.0995	1.20135	1.0711	1.53758	1.05555	1.44905	1.04098	1.05986	1.15367	1.02762
ENSMUSG00000007279	Scube2	TRE	0.194372	0.683115	0.0484022	0.817803	0.492081	0.590655	0.588974	0.181325	0.588037	0.0349194	0.713766	0.437008	0.484152	0.491808
ENSMUSG00000007338	Mrpl49	NRE	19.0571	11.9202	12.5907	11.8459	10.9895	9.99404	10.527	22.8742	14.2567	14.0917	13.7054	12.4265	11.2756	12.1247
ENSMUSG00000007379	Dennd2c	TRE	20.4167	2.84033	3.05921	2.11329	7.11339	3.07987	7.6353	19.4525	2.63951	2.75629	1.95036	6.19373	2.7717	6.74649
ENSMUSG00000007411	Mark3	NRE	39.9161	20.3069	20.7238	17.7544	18.0419	17.6093	17.583	34.2431	17.5665	16.8994	15.2522	14.978	14.7937	14.7476
ENSMUSG00000007415	Gatad1	NRE	14.5864	10.3134	11.3512	10.1144	9.40544	7.97258	8.70032	25.6659	17.8381	18.7036	17.208	15.2921	13.385	14.3884
ENSMUSG00000007440	Pcdha4	TRE	0.0658048	0.157148	0.155209	0.184273	0.0622349	0.14955	0.0831165	0.316725	0.730776	0.75304	0.85657	0.270604	0.694753	0.368639
ENSMUSG00000007457	2310003L06Rik	not present	0	0.318115	0	0.771676	0.0178379	0.308198	0	0	0.293387	0	0.724464	0.0152188	0.275776	0
ENSMUSG00000007458	M6pr	NRE	41.1764	79.5837	46.909	84.3586	78.8449	77.6147	83.7111	38.5112	72.9877	41.5033	77.2132	68.3501	68.5521	73.3436
ENSMUSG00000007476	Lrrc8a	NRE	4.04279	3.7429	5.74808	3.56702	4.04093	4.89749	4.06027	4.07082	3.76702	5.52188	3.53619	3.85462	4.76757	3.8963
ENSMUSG00000007480	Mc5r	TRE	1.39683	0.197902	0.00903578	0.157576	0.0847412	0.0597607	0.0235114	1.35731	0.176539	0.00901068	0.161039	0.0716572	0.0590834	0.0231209
ENSMUSG00000007564	Ppp2r1a	NRE	101.881	82.4638	89.2534	79.5397	81.5258	81.7375	81.3365	106.457	83.0454	86.232	79.8284	81.4932	83.878	84.3584
ENSMUSG00000007570	Fance	NRE	6.56543	5.62674	8.2178	4.86025	6.02872	5.30607	5.86043	9.99058	8.56596	12.7468	7.70158	8.62432	8.63144	8.74183
ENSMUSG00000007589	Tinf2	NRE	9.13183	10.888	7.9567	10.9583	15.4736	10.4398	15.4545	10.9288	14.4659	9.43743	14.4911	19.859	13.5061	20.2757
ENSMUSG00000007591	Tssk4	TRE	0.443635	0.358739	0.651149	0.473414	0.47431	0.466892	0.46059	0.424792	0.362265	0.592466	0.549775	0.45947	0.46463	0.495818
ENSMUSG00000007594	Hapln4	TRE	0.0242796	0.915018	0.171836	0.772955	0.0542236	0.571739	0.0593361	0.0248674	0.892217	0.161329	0.777722	0.0507416	0.5234	0.0531938
ENSMUSG00000007603	Dus3l	NRE	18.148	16.4253	18.8334	17.4447	28.3644	20.4206	27.0526	15.1203	13.4767	14.7952	14.3695	22.4894	16.5022	21.317
ENSMUSG00000007610	Gtpbp3	NRE	7.40082	5.56452	8.20832	5.20563	6.86916	6.40448	6.80087	6.84201	5.01501	7.06761	4.62433	5.78858	5.50876	5.65748
ENSMUSG00000007613	Tgfbr1	TRE+NRE	15.3866	11.6701	16.3837	8.09168	10.9279	7.24559	10.8414	20.4	16.4286	21.4448	12.724	17.3048	12.5794	17.3593
ENSMUSG00000007617	Homer1	TRE	1.20442	1.31651	1.40444	1.32726	2.01987	1.36674	2.12638	4.3981	4.77135	5.30446	5.3762	8.48261	5.10486	8.18821
ENSMUSG00000007646	Rad51c	TRE+NRE	0.707421	1.17943	0.575792	1.01408	0.699217	0.766451	0.605793	0.95145	1.64393	0.738683	1.40023	0.81899	1.0921	0.703984
ENSMUSG00000007653	Gabrb2	TRE	0.00471972	0.678448	0.523469	0.891769	0.102588	0.489545	0.12679	0.00447378	0.783898	0.525266	0.942656	0.0978447	0.535783	0.146891
ENSMUSG00000007655	Cav1	NRE	0.926012	1.66131	2.22706	1.45682	0.145718	0.919725	0.181933	1.61078	2.86532	4.00645	3.06455	0.282146	1.85057	0.410676
ENSMUSG00000007656	Arpp19	TRE+NRE	21.9365	19.1111	17.2861	18.9206	18.2237	16.9882	17.6131	112.338	108.953	80.9068	112.714	116.358	117.409	118.969
ENSMUSG00000007659	Bcl2l1	NRE	7.50322	24.5322	8.68714	31.3175	57.3465	44.0062	62.2947	17.6388	53.5186	17.9622	64.9244	110.06	88.507	118.931
ENSMUSG00000007670	Khsrp	NRE	41.8656	27.775	31.3666	23.483	29.489	24.6063	27.8444	35.4061	23.3374	25.1775	19.7954	23.8561	19.9539	22.4996
ENSMUSG00000007682	Dio2	TRE	0.233378	1.31951	0.826091	1.13932	0.0934608	0.700148	0.112253	0.240178	1.33809	0.807683	1.14834	0.0882663	0.686106	0.109846
ENSMUSG00000007721	Ccdc124	NRE	36.4665	35.8477	35.891	36.5176	50.3771	49.6469	49.5142	33.0465	32.2115	30.7826	32.4706	43.2538	41.8077	42.2285
ENSMUSG00000007739	Cct4	NRE	105.782	88.4711	79.4674	91.1491	89.9033	69.4409	81.9875	113.757	93.6001	79.4729	94.7501	91.3339	70.5493	84.7819
ENSMUSG00000007777	0610009B22Rik	NRE	12.7289	10.3736	10.2061	10.4423	10.4506	10.4487	10.4474	14.9992	11.9878	11.3252	12.0455	11.5256	11.6587	11.8243
ENSMUSG00000007783	Cpt1c	NRE	2.76444	4.22481	5.92418	5.39797	8.96938	6.72653	8.61925	2.295	3.45285	4.64851	4.42575	7.04282	5.40112	6.95989
ENSMUSG00000007805	Twist2	TRE	7.98663	0.247807	0	0.280056	0	0.159317	0	8.11493	0.251316	0	0.284905	0	0.148788	0
ENSMUSG00000007812	Zfp655	TRE+NRE	11.7594	6.74279	6.1985	6.11851	4.82375	5.12835	4.90874	14.7877	9.14817	7.95369	8.3621	6.51386	6.96067	7.02638
ENSMUSG00000007815	Rhoa	NRE	192.624	148.372	125.256	152.544	157.36	154.418	163.205	176.39	134.94	108.862	136.631	131.715	133.062	137.526
ENSMUSG00000007817	Zmiz1	NRE	14.6551	13.6092	21.3334	15.3858	20.9931	21.0166	23.8893	15.607	13.8478	20.5996	15.3883	20.4613	20.6653	23.7458
ENSMUSG00000007827	Ankrd26	NRE	2.80648	1.57056	1.51312	1.03539	1.05398	0.643928	0.654135	2.41406	1.32358	1.26624	0.902349	0.825852	0.549275	0.560719
ENSMUSG00000007833	Aldh16a1	NRE	8.75404	11.3718	9.49914	11.874	12.2108	12.579	11.6776	16.4067	22.2387	17.2868	22.7453	22.3878	23.3438	20.473
ENSMUSG00000007836	Hnrnpa0	NRE	96.2058	57.9187	63.8622	43.6322	51.9296	41.7851	46.8503	99.6059	59.3963	62.6198	44.3409	51.327	41.2323	45.7845
ENSMUSG00000007837	Prrg2	NRE	10.0566	8.7586	11.8199	8.63668	9.98366	11.4455	10.9788	12.2439	10.2071	13.0038	10.5632	11.4607	13.9762	12.2368
ENSMUSG00000007850	Hnrnph1	NRE	169.72	111.213	141.204	102.295	102.849	89.9714	90.3809	158.269	103.297	123.778	93.2239	89.2631	78.9033	79.1762
ENSMUSG00000007867	1700019E19Rik	NRE	17.4353	13.7559	20.4179	14.5168	12.3529	14.6081	14.1007	13.7017	10.6533	14.952	11.379	9.16909	10.6505	10.3437
ENSMUSG00000007872	Id3	NRE	10.3944	21.8293	61.4975	18.6046	8.51334	18.1782	8.54954	10.2376	21.3304	55.8017	17.856	7.87936	16.7812	7.91793
ENSMUSG00000007877	Tcap	NRE	0	0.750832	0.0787962	0.715935	0.0754064	0.905792	0.131805	0	0.718771	0.0762727	0.668315	0.0764021	0.797197	0.128923
ENSMUSG00000007880	Arid1a	NRE	22.2247	15.3469	19.7178	13.1854	16.3217	15.2817	15.5578	25.884	17.9866	22.1547	15.3376	18.8381	17.8344	17.9384
ENSMUSG00000007888	Crlf1	TRE	0.00660158	0.852999	0.142803	0.685844	0.0608755	0.508008	0.0760045	0.0196894	1.49484	0.166131	1.22993	0.0796963	0.641721	0.152916
ENSMUSG00000007891	Ctsd	NRE	72.8905	59.2666	89.2464	56.4963	29.6086	72.6641	38.2775	89.7932	71.6449	100.799	66.7691	32.6223	87.8103	43.1491
ENSMUSG00000007892	Rplp1	NRE	481.627	562.189	516.15	592.382	674.862	587.773	626.906	265.387	297.506	274.104	318.073	340.488	309.155	309.195
ENSMUSG00000007907	4931407G18Rik	TRE	0	0.149529	0	0.330167	0	0.244403	0.00930529	0	0.146791	0	0.31991	0	0.225875	0.00915074
ENSMUSG00000007908	Hmgcll1	TRE	0.339223	0.397099	0.387238	0.536165	0.227747	0.34288	0.224371	0.407132	0.502627	0.471613	0.699999	0.275393	0.431865	0.284198
ENSMUSG00000007944	Ttc9b	TRE	0.0118742	0.337076	0	0.670706	0.0312846	0.4247	0.0151898	0.0117188	0.282504	0	0.608835	0.0266912	0.38132	0.0147938
ENSMUSG00000007946	Phox2a	TRE	2.56362	3.06942	5.33823	2.9758	3.112	3.58226	3.34044	0.0141947	0.628995	0.285405	0.428389	0.122596	0.358609	0.122131
ENSMUSG00000007950	Abhd8	NRE	5.79009	3.91231	7.39193	4.34015	4.20629	4.49183	4.40635	5.72746	3.76545	6.83506	4.0764	3.74518	4.18222	4.04473
ENSMUSG00000007987	Rabl5	NRE	17.0717	23.1949	17.9338	24.0086	14.3441	19.5876	15.502	14.5374	19.6774	14.6782	20.5547	11.6654	16.1987	12.7526
ENSMUSG00000007989	Fzd3	TRE	6.12749	1.38003	2.4002	0.984877	0.625947	0.837579	0.410794	6.0174	1.35744	2.23434	0.940692	0.558827	0.780484	0.369294
ENSMUSG00000008028	1700008O03Rik	TRE	0.301472	1.14669	0.304893	1.42483	1.02122	1.18563	1.27816	0.221809	1.37287	0.299529	1.57137	1.22147	1.20624	1.46658
ENSMUSG00000008035	Mid1ip1	NRE	1.01141	11.7997	10.837	9.8906	6.96558	10.1626	8.13166	1.60318	17.5474	14.688	14.1337	9.63964	14.9979	12.1335
ENSMUSG00000008036	Ap2s1	NRE	83.7398	68.3663	70.8986	71.0759	70.1567	76.8537	68.8681	74.4326	59.948	59.2621	61.3185	60.1529	66.6812	59.2339
ENSMUSG00000008090	Fgfrl1	NRE	3.6163	3.46091	2.92897	2.65841	2.88929	2.97615	3.03876	3.5249	3.38557	2.81976	2.68031	2.55525	2.84367	2.8332
ENSMUSG00000008129	4930432K21Rik	TRE	0.414994	1.17453	0.545538	1.18295	0.600167	0.953352	0.571266	0.432584	1.18478	0.651696	1.10128	0.730769	0.998772	0.553782
ENSMUSG00000008136	Fhl2	TRE	1.77064	3.33733	11.7227	2.19218	0.695186	2.09218	0.621781	1.61025	3.11065	10.0022	1.99022	0.534121	1.82991	0.51209
ENSMUSG00000008140	2310044H10Rik	NRE	29.0074	27.6858	35.8335	25.4261	26.69	28.8761	26.8654	35.5817	33.8043	39.6202	30.518	32.6514	35.9305	32.7698
ENSMUSG00000008153	Clstn3	TRE	0.0346061	2.24096	0.672679	3.18982	0.27002	3.11888	0.292858	0.0304289	2.06775	0.590212	2.90001	0.229516	2.79931	0.264708
ENSMUSG00000008167	Fbxw9	NRE	20.5045	10.8475	15.0819	8.14864	8.43766	9.24367	8.25669	17.9797	9.27613	12.4509	6.94744	6.95598	7.72045	6.75854
ENSMUSG00000008193	Spib	TRE	2.72012	127.971	150.153	145.769	167.672	137.945	167.675	2.6339	125.843	140.951	141.797	156.591	129.739	156.688
ENSMUSG00000008200	Fnbp4	NRE	15.7387	15.2102	23.5284	15.4384	15.3157	13.5188	14.8344	14.5969	13.9702	20.384	14.1977	13.4718	12.0468	13.1439
ENSMUSG00000008206	Lass4	NRE	0.498386	3.17707	2.56855	3.06633	2.94869	3.35903	2.98652	0.583052	3.6382	3.02358	3.75995	3.98312	4.37955	3.90789
ENSMUSG00000008226	Scrn3	NRE	3.20185	1.83138	1.97162	2.05568	2.58599	2.13448	2.60224	4.99428	3.05009	3.08813	3.4772	4.23845	3.57913	4.29172
ENSMUSG00000008301	Phax	NRE	19.6213	11.9714	15.7669	10.1171	10.3771	9.86855	9.63663	27.0709	18.2924	20.3046	14.4632	14.9706	13.9175	13.1083
ENSMUSG00000008305	Tle1	NRE	12.8825	9.93923	8.84966	10.7194	15.2986	13.3089	15.826	23.4751	18.6406	14.2135	19.3005	25.7423	23.8754	27.2533
ENSMUSG00000008307	1700109H08Rik	TRE	2.40086	1.25753	1.98792	1.81976	1.8588	1.03477	1.48174	1.87462	0.928921	1.24369	1.17721	1.75838	0.745961	1.03281
ENSMUSG00000008318	Relt	TRE	1.43316	28.385	17.5837	29.2218	38.2345	29.5059	37.3509	2.01682	36.418	21.7115	36.9963	48.0107	37.1683	45.7595
ENSMUSG00000008333	Snrpb2	NRE	19.7173	17.1315	13.6162	15.2319	12.2573	10.1319	11.2343	32.1622	27.3849	19.6224	23.4885	16.6105	12.772	16.2219
ENSMUSG00000008348	Ubc	NRE	463.667	429.861	592.137	588.615	681.391	727.205	752.575	58.1168	54.4189	0	0	0	0	0
ENSMUSG00000008373	Prpf31	NRE	15.6407	16.422	13.4077	15.0614	14.9214	12.8006	13.8225	20.476	21.2318	16.4391	19.5313	18.3378	16.2936	17.0263
ENSMUSG00000008384	Sertad1	NRE	9.52867	15.5799	14.0457	15.8746	18.1692	19.3598	18.9452	10.5477	17.545	14.972	17.6634	20.6321	21.2482	21.2238
ENSMUSG00000008393	Carhsp1	NRE	44.1186	30.6797	52.0247	17.6595	16.6707	11.5854	10.7135	43.6797	30.2681	48.9602	17.3493	15.6404	10.9229	10.1261
ENSMUSG00000008398	Elk3	TRE+NRE	2.63208	13.5546	16.6124	10.0476	9.5093	7.55428	9.23753	4.051	20.4996	22.9864	14.7879	13.6046	11.3983	13.6573
ENSMUSG00000008429	Herpud2	NRE	24.6209	15.049	17.0841	14.5413	14.6305	14.1035	14.4755	22.4939	13.5831	14.4328	13.0385	12.483	11.9959	12.6053
ENSMUSG00000008435	Rdh13	NRE	3.29123	2.94806	4.54936	2.36734	1.84585	2.17089	1.64947	4.67335	4.35293	6.78127	3.14455	2.55585	3.08406	2.33573
ENSMUSG00000008438	Adam21	TRE	0.0372827	0.0802891	0.0879802	0.0564078	0.0491139	0.0484901	0.0476932	0.0386487	0.0817212	0.0822037	0.0572058	0.0442622	0.047891	0.0465851
ENSMUSG00000008450	Nutf2	NRE	12.7417	8.23682	8.7689	8.22557	8.07682	6.06385	6.59212	3.64396	1.54729	1.85722	1.22619	1.52365	0.981728	1.00942
ENSMUSG00000008461	Fut1	NRE	4.81846	29.1898	22.599	32.8318	41.6361	36.881	42.6811	4.86076	29.1111	21.5409	32.5475	39.4676	35.3275	40.8213
ENSMUSG00000008475	Arpc5	NRE	66.8389	119.869	92.002	116.148	104.326	108.681	117.611	63.2167	112.846	82.1071	108.203	89.7275	95.4888	102.137
ENSMUSG00000008482	Rnf151	TRE	0.0273835	0.01787	0.01795	0.0368272	0	0.0791448	0.0233532	0.0288406	0.0182988	0.0175939	0.0190245	0	0.0780659	0.0113722
ENSMUSG00000008489	Elavl2	TRE	0.0267873	0.38727	0.0688861	0.442697	0.12758	0.203232	0.137069	0.0375029	0.617753	0.104123	0.630367	0.231604	0.432097	0.197577
ENSMUSG00000008496	Pou2f2	TRE	0.0287032	0.693054	0.0235188	0.794557	0.0336105	0.661944	0.0611967	0.0375675	1.0991	0.0274226	1.08912	0.0888542	0.967385	0.0775767
ENSMUSG00000008540	Mgst1	NRE	8.90668	8.6288	17.0009	6.39519	5.19893	8.96972	6.14515	19.4754	19.5739	37.149	14.5805	12.3547	21.7815	14.622
ENSMUSG00000008575	Nfib	NRE	38.3361	4.9003	8.86014	2.38835	2.20268	1.36787	1.24956	41.8946	5.30572	9.16817	2.56927	2.57239	1.64078	1.62514
ENSMUSG00000008590	Htr3b	TRE	0.0135225	0.293455	0.0170858	0.366128	0.0208161	0.178274	0.00726237	0.00444256	0.255547	0.00852549	0.315101	0.00505926	0.130101	0
ENSMUSG00000008601	Rab25	NRE	0.30049	43.5849	39.5132	49.6799	47.49	64.3032	57.1394	0.307672	44.2327	38.4152	49.966	46.0183	63.2309	56.1442
ENSMUSG00000008604	Ubqln4	NRE	9.05703	11.6918	14.8929	9.89829	10.1038	9.82334	9.54799	8.48285	10.8148	13.1299	9.08949	8.64396	8.71184	8.28188
ENSMUSG00000008658	Rbfox1	TRE	1.33386	4.5523	8.72577	5.49598	6.86975	5.73088	6.51057	1.34855	4.61026	8.29347	5.3868	6.35922	5.4062	6.01115
ENSMUSG00000008668	Rps18	NRE	598.037	508.006	437.272	440.692	500.323	399.132	462.27	182.589	154.106	129.33	135.146	134.1	109.911	125.27
ENSMUSG00000008682	Rpl10	NRE	427.884	460.025	391.382	484.485	546.401	426.249	539.67	9.25678	9.98424	8.47962	9.07943	8.90505	6.61943	8.75876
ENSMUSG00000008683	Rps15a	TRE+NRE	69.7215	71.5832	62.7433	67.5624	73.5177	56.1092	64.0558	590.034	593.242	499.134	563.383	557.241	431.224	505.05
ENSMUSG00000008686	Zfp955a	NRE	3.94233	2.57702	3.67435	2.60751	1.99443	1.84319	1.91272	1.21606	0.883087	1.10392	0.967551	0.615786	0.674025	0.605174
ENSMUSG00000008690	Ncaph2	TRE+NRE	35.7897	36.6901	31.9832	34.7783	41.5364	34.0394	40.086	27.2819	27.1428	23.1519	25.853	29.3583	24.6304	27.9866
ENSMUSG00000008730	Hipk1	TRE+NRE	20.4669	18.1884	30.7686	18.4675	23.8435	23.9619	28.1861	20.8506	18.3924	29.652	18.4873	23.9804	24.0101	28.1399
ENSMUSG00000008734	Gprc5b	TRE+NRE	2.92131	4.39035	8.7351	2.98045	2.45499	3.49377	2.25818	2.91992	4.33646	8.30301	2.92991	2.32702	3.36897	2.15188
ENSMUSG00000008763	Man1a2	NRE	14.3989	7.74851	18.1278	5.13968	3.95725	4.33914	3.35329	13.7505	7.31792	16.4864	4.80741	3.56561	3.9374	3.03882
ENSMUSG00000008789	Ceacam5	not present	0	0.206835	0.00109348	0.359512	0	0.140422	0.0042679	0	0.153848	0	0.263316	0	0.104002	0.00420348
ENSMUSG00000008813	Tppp2	not present	0	0.415773	0	0.605698	0.115766	0.269864	0.112417	0	0.346517	0	0.525779	0.0812839	0.266854	0.0735226
ENSMUSG00000008822	Acyp1	NRE	4.27685	3.22629	5.06171	3.23736	3.63887	3.92096	3.72937	8.45645	6.18948	9.29651	6.24869	6.79537	7.36187	7.19033
ENSMUSG00000008843	Cldn13	TRE	0.356003	64.3098	2.02024	59.6076	57.1614	58.2522	64.486	0.342471	63.3438	1.96123	58.0892	53.5697	55.6412	60.848
ENSMUSG00000008845	Cd163	NRE	0.109129	1.29141	0.166255	1.48021	0.12662	1.22597	0.10375	0.0437466	1.12626	0.0682602	1.26549	0.0468599	0.982626	0.0370398
ENSMUSG00000008855	Hdac5	NRE	1.62638	5.69382	11.0424	4.66536	2.80954	6.73985	3.3182	2.76797	9.91091	17.8812	8.51488	5.06401	10.9306	5.32272
ENSMUSG00000008859	Rala	NRE	25.5757	30.6481	25.2747	34.3211	33.9741	29.0479	36.4105	24.0869	28.1013	22.7277	31.1099	29.4623	25.7193	32.1155
ENSMUSG00000008874	Clec3a	not present	0	1.85151	0	2.59317	0	1.93063	0	0	1.49599	0	2.23116	0	1.59396	0
ENSMUSG00000008892	Vdac3	NRE	93.3244	111.287	95.271	121.435	127.412	101.374	124.379	79.6521	93.1314	76.8124	101.277	102.148	82.04	100.166
ENSMUSG00000008932	Slc1a7	TRE	0.236484	0.498351	0.725437	0.734983	0.552132	0.663212	0.669277	0.124698	0.342132	0.529564	0.533421	0.324031	0.452558	0.384009
ENSMUSG00000008958	Vps72	NRE	23.5938	22.2145	31.2709	22.6897	29.1086	26.3949	28.3065	20.563	19.6232	26.2022	19.7503	24.1126	21.9952	23.652
ENSMUSG00000008976	Gabpa	NRE	17.4217	10.125	9.97467	8.66322	8.4388	7.68543	8.17968	22.1804	12.1903	10.8333	9.90758	9.98125	9.1659	9.35923
ENSMUSG00000008999	Bmp7	TRE	28.8786	19.2317	32.623	12.589	17.2396	16.5081	15.5688	26.6029	17.2522	27.9174	11.0983	14.3662	13.9823	13.0074
ENSMUSG00000009013	Dynll1	NRE	24.7769	63.1262	50.127	65.2274	60.8139	61.4264	59.4189	59.3475	155.084	118.124	160.515	138.197	142.331	135.517
ENSMUSG00000009030	Pdcl	NRE	13.1427	10.0065	10.2092	9.0749	9.42493	9.30007	9.89042	23.332	17.0988	16.058	14.4742	16.2828	16.8989	17.1916
ENSMUSG00000009035	Tmem184b	NRE	49.3987	16.1821	21.0599	16.5441	23.0599	18.5858	22.6593	47.0815	15.0497	18.9241	15.3884	20.5293	16.7198	20.2042
ENSMUSG00000009047	Gm5965	not present	0	0.21053	0	0.277395	0	0.121363	0	0	0.0561151	0	0.0186443	0	0.0197169	0
ENSMUSG00000009070	Rtdr1	TRE	0.0698043	0.380087	0.442125	0.303232	0.192002	0.197314	0.138531	0.0595338	0.593054	0.725797	0.412448	0.200749	0.235875	0.133556
ENSMUSG00000009073	Nf2	NRE	35.0487	24.5969	33.8856	22.3677	23.9357	20.9792	20.7284	47.6889	34.3338	43.3264	30.7071	31.8792	28.5748	27.4477
ENSMUSG00000009075	Cabp7	TRE	1.4578	1.61296	1.10854	1.89946	1.40903	1.97839	1.50563	0.0333375	0.545654	0.0814722	0.506078	0.0380389	0.334299	0.0333084
ENSMUSG00000009076	Zmat5	NRE	19.6368	14.2656	13.2582	15.8122	18.2143	18.3944	18.3623	15.9957	10.9383	9.8958	12.43	13.9012	14.4245	13.9539
ENSMUSG00000009079	Ewsr1	NRE	73.8195	63.6349	74.09	57.8585	63.3846	57.2401	56.9836	108.998	91.0488	103.104	83.0772	88.5449	79.0169	79.25
ENSMUSG00000009090	Ap1b1	NRE	34.7869	25.7533	32.36	31.8305	34.1059	38.0908	36.8342	30.931	22.9111	27.0472	27.7714	28.4795	32.2364	30.8769
ENSMUSG00000009092	Derl3	TRE	0.365557	4.42125	1.09428	7.71853	6.67766	9.16555	7.80427	0.355303	3.90612	0.956501	6.93891	5.77564	8.02515	6.77307
ENSMUSG00000009093	Gstt4	TRE	0.0112583	0.694288	0.0664186	1.29455	0.163141	1.0982	0.316843	0.011111	0.646597	0.0533064	1.10089	0.150268	0.989687	0.296055
ENSMUSG00000009097	Tbx1	TRE	0.0599282	1.96518	0.377118	2.23652	1.1605	1.67577	1.21126	0.0523283	1.66066	0.311154	1.90617	0.961482	1.40751	0.988824
ENSMUSG00000009108	Gnat2	TRE	0.036821	1.19393	0.119927	1.4763	0.18796	0.843057	0.235513	0.0585234	1.46615	0.157906	1.67252	0.281066	1.09425	0.264882
ENSMUSG00000009112	Bcl2l13	NRE	10.2456	9.59009	8.21167	8.64987	8.17922	8.81963	8.21385	10.0914	9.35571	7.69386	8.35567	7.53946	8.27776	7.65137
ENSMUSG00000009114	2610028H24Rik	not detected	0.898357	2.6826	3.60088	1.84963	1.60989	2.38815	1.73823	0.0656932	1.51271	2.24724	0.817071	0.330392	0.864414	0.187845
ENSMUSG00000009115	1700027D21Rik	TRE	0.0407395	0.183442	0.0480687	0.205459	0.0858682	0.167789	0.0729613	0.0545962	0.154368	0.0491657	0.184942	0.0847129	0.152117	0.061105
ENSMUSG00000009145	Dqx1	TRE	0.686618	1.50614	2.1472	2.93174	3.91657	4.45321	4.10207	0.505644	1.21425	1.64936	2.45202	3.12684	3.6532	3.28256
ENSMUSG00000009185	Ccl8	TRE	0.33982	32.4325	4.63605	39.0531	4.44859	24.8149	2.06486	0.287275	28.6926	4.13683	34.7056	3.70161	20.8955	1.72921
ENSMUSG00000009207	Lnp	NRE	3.84169	3.93058	3.25654	4.05302	2.62607	2.60815	2.92898	5.17664	5.52444	4.34546	5.68039	3.68313	3.7865	4.18953
ENSMUSG00000009210	2310007L24Rik	TRE	3.94886	4.65515	3.13124	5.55909	4.5755	6.93072	5.58381	5.39758	6.22753	3.85469	7.11355	5.67833	8.96806	7.06703
ENSMUSG00000009214	Tmem8c	TRE	0.0502786	2.33426	0.614427	2.89792	0.520409	2.14083	0.661556	0.048845	2.34105	0.577279	2.89771	0.524787	2.09514	0.685937
ENSMUSG00000009216	Fam163b	TRE	0.209064	1.45766	0.36785	1.5723	0.908363	1.62192	0.994694	0.194823	1.40295	0.339589	1.49662	0.819344	1.47329	0.913706
ENSMUSG00000009246	Trpm5	not detected	0.21039	7.09197	119.521	9.77295	6.65761	16.3283	10.9631	0.252613	9.02064	139.942	12.5462	7.28939	19.9454	12.0444
ENSMUSG00000009248	Ascl2	TRE	3.1374	2.2671	1.93963	2.27494	0.20399	1.94832	0.258378	3.05441	2.20459	1.82131	2.16397	0.187762	1.81807	0.227618
ENSMUSG00000009281	Rarres2	NRE	3.59467	14.1199	4.67998	25.7514	8.69333	25.1124	13.2168	0.168915	9.15743	0.654725	17.8582	4.043	16.5872	7.33943
ENSMUSG00000009291	Pttg1ip	NRE	64.1429	37.671	35.8962	33.5096	28.3164	39.3874	33.5429	73.7487	43.6344	37.1634	35.6309	32.2149	44.2235	39.7083
ENSMUSG00000009292	Trpm2	TRE	47.1149	4.43811	3.77645	3.97284	4.88125	4.00505	4.47441	41.8225	3.87389	3.30772	3.45055	4.12363	3.34064	3.78413
ENSMUSG00000009293	Ube2g2	NRE	21.4544	18.8538	15.8807	19.0467	24.246	21.2299	24.2334	24.7046	21.8829	18.1023	21.4975	29.2608	25.4791	27.1239
ENSMUSG00000009350	Mpo	TRE	0.14524	27.2984	0.278384	22.9355	0.253902	22.283	0.276359	0.216972	36.554	0.489039	32.0495	0.321938	29.5827	0.374919
ENSMUSG00000009356	Lpo	TRE	4.26735	84.5831	46.0432	99.8612	90.6509	102.43	91.2941	4.26659	81.7593	43.345	95.6937	83.2165	94.4317	84.1211
ENSMUSG00000009376	Met	TRE+NRE	1.63091	4.13034	3.1053	4.93191	2.66684	4.37815	3.25556	2.02399	5.0912	3.47016	5.97459	2.73655	4.83902	3.6929
ENSMUSG00000009378	Slc16a12	NRE	0.0160745	2.91621	0.540017	3.31027	1.22465	2.64527	1.38801	0.0174627	2.87479	0.505236	3.25905	1.10944	2.48879	1.27376
ENSMUSG00000009394	Syn2	TRE	0.0650887	9.30787	1.67766	10.7015	38.0707	14.785	39.8745	0.0940018	14.5348	2.5655	16.4918	56.3039	22.1228	59.0578
ENSMUSG00000009406	Elk1	NRE	4.01754	2.41748	3.4257	2.37912	2.73532	2.59654	2.68905	3.72989	2.12143	2.96449	2.0851	2.20405	2.16082	2.17089
ENSMUSG00000009418	Nav1	TRE+NRE	16.0937	2.82031	4.96097	2.65006	1.91432	2.4693	1.74103	15.2836	2.61635	4.37174	2.39697	1.64114	2.17059	1.51205
ENSMUSG00000009470	Tnpo1	NRE	32.7803	23.3967	22.8137	20.7998	21.182	18.423	21.1173	33.2491	23.6659	21.6722	20.8214	20.8014	18.0244	20.7437
ENSMUSG00000009471	Myod1	TRE	0	1.08873	0.0172674	0.93881	0	0.450467	0.0149768	0	1.09434	0.017023	0.937048	0	0.420407	0.0145863
ENSMUSG00000009487	Otog	not detected	0.0287161	2.24384	0.0593049	2.47797	0.0826142	2.0524	0.0611032	0.018249	1.89859	0.0438211	2.13698	0.0466934	1.70454	0.036488
ENSMUSG00000009535	Rnmt	TRE+NRE	7.27129	7.43417	5.87912	6.85344	6.91625	6.12578	6.76988	16.604	16.76	11.2019	13.9798	14.3939	13.5915	15.2393
ENSMUSG00000009545	Kcnq1	NRE	0.105471	7.86368	14.8817	11.2589	5.95595	9.37373	5.81065	0.101963	7.5726	13.7737	10.8423	5.51705	8.76001	5.51348
ENSMUSG00000009549	Srp14	NRE	71.01	48.7917	51.2294	55.5454	58.774	53.5803	62.6802	87.3799	59.3451	60.0102	67.5609	67.8636	62.6882	71.9609
ENSMUSG00000009551	6330409D20Rik	not detected	0.0484942	3.00958	0.123974	3.75657	7.17408	4.88807	7.2209	0.00957196	2.64978	0.0579729	3.39458	5.97376	4.18921	6.15145
ENSMUSG00000009555	Cdk9	NRE	28.7478	25.2763	29.6173	24.3956	29.5899	28.5693	30.7893	29.6731	25.7834	29.0339	25.0221	28.161	27.721	29.4062
ENSMUSG00000009563	Tor2a	NRE	9.27346	12.4543	12.3918	12.183	12.7486	12.8161	14.6311	9.32254	12.1796	11.84	11.6792	13.4336	13.1334	15.5289
ENSMUSG00000009566	Fpgs	TRE	8.63296	4.19937	4.5176	3.9131	3.79084	3.12848	3.11659	8.38129	4.02522	3.80953	3.52191	3.13432	2.84316	2.67885
ENSMUSG00000009569	Mkl2	NRE	11.2073	6.1766	9.11936	4.77617	7.30609	5.61597	6.58268	14.6741	7.99049	10.9761	6.15153	9.16593	7.18409	8.09838
ENSMUSG00000009575	Cbx5	TRE+NRE	11.204	9.18602	9.97711	8.52113	7.22867	5.60554	6.06238	16.3741	13.299	13.504	12.8725	11.1316	8.49143	9.0867
ENSMUSG00000009580	Odam	TRE	0.00788735	2.37798	0.0775528	3.47261	0.0519515	1.87215	0.141256	0.00860601	2.06625	0.0758917	3.14339	0.0500846	1.75359	0.0988889
ENSMUSG00000009585	Apobec3	NRE	71.6486	133.507	83.799	150.158	178.916	152.584	187.527	112.52	205.378	125.281	231.262	248.942	224.154	264.296
ENSMUSG00000009588	St6galnac1	TRE	0.0369568	1.27751	0.255013	1.80853	3.50686	2.53939	3.83451	0.0286718	1.21603	0.256044	1.78098	3.23578	2.47293	3.88016
ENSMUSG00000009596	Taf7l	TRE	0.0270918	0.228068	0.0213106	0.34431	0.114205	0.164434	0.0346567	0.0275552	0.241374	0.0216445	0.355834	0.144	0.178425	0.0281847
ENSMUSG00000009614	Sardh	TRE	0.514382	5.17577	0.975085	5.82166	3.46133	5.44448	3.07369	0.491724	4.67397	0.87086	5.2152	3.11368	4.81292	2.88046
ENSMUSG00000009621	Vav2	TRE+NRE	5.60782	11.7542	8.97205	12.7482	20.1516	17.5596	21.6386	4.85853	10.0596	7.30042	10.835	16.1933	14.5078	17.6014
ENSMUSG00000009628	Tex15	TRE	0.16919	0.380917	0.18632	0.321967	0.120356	0.158925	0.108217	0.262196	0.75876	0.297261	0.500803	0.184817	0.267092	0.218043
ENSMUSG00000009630	Ppp2cb	NRE	47.4179	45.2148	44.2103	39.633	38.8197	38.529	39.0274	41.732	39.3164	36.6318	34.0194	32.0626	32.1426	32.4516
ENSMUSG00000009633	G0s2	NRE	12.838	3.63376	8.69416	4.39435	2.25832	5.61601	1.69834	12.3341	3.42442	8.05655	4.13341	2.07895	5.31795	1.56535
ENSMUSG00000009640	Dmap1	NRE	21.3179	16.6072	19.196	15.2459	15.6026	14.805	16.3747	17.817	13.77	15.1833	12.5332	12.3455	11.8647	12.9198
ENSMUSG00000009646	Pla2g12b	TRE	0.0275457	2.03127	0.135422	2.70894	0.314487	2.08985	0.328881	0.0324206	2.24579	0.158963	2.73467	0.277223	2.03607	0.336328
ENSMUSG00000009647	Ccdc109a	TRE+NRE	11.919	8.00671	8.66478	8.18882	10.2625	9.14403	10.1864	13.5992	8.82703	9.21595	8.7825	10.6426	9.6422	10.3017
ENSMUSG00000009654	Oit3	TRE	0.0519282	0.527862	0.0157104	0.6245	0.0263104	0.290068	0.0306592	0.0500871	0.463924	0.0155327	0.544822	0.0280613	0.265458	0.0300049
ENSMUSG00000009670	Tex11	TRE	0.156226	2.28656	0.117294	2.81375	2.4269	2.07246	1.92124	0.137825	2.03081	0.0861906	2.52354	2.01109	1.83837	1.65042
ENSMUSG00000009681	Bcr	TRE	25.1062	14.8101	22.4901	10.2435	13.8771	9.72054	10.6956	27.3389	16.347	23.0274	11.2662	14.6869	10.3766	11.3894
ENSMUSG00000009687	Fxyd5	NRE	0.436807	1.59348	0.748221	1.99495	0.823847	1.66718	1.24064	1.74556	6.6734	2.70722	9.04215	3.31251	6.59832	4.78249
ENSMUSG00000009731	Kcnd1	TRE	0.46552	0.539139	0.528719	0.621872	0.651855	0.631907	0.581653	0.441599	0.516666	0.477093	0.594197	0.575948	0.558644	0.519225
ENSMUSG00000009733	Tfcp2	NRE	9.98741	4.6525	6.04365	4.67161	5.01843	4.43157	4.58912	9.26371	4.37977	5.25293	4.31796	4.4464	4.08785	4.24201
ENSMUSG00000009734	Pou6f2	not detected	0.0255331	0.694289	0.0478573	0.776205	1.27626	0.785364	1.06274	0.0196391	0.890204	0.0350169	1.07768	1.4558	1.00949	1.14604
ENSMUSG00000009739	Pou6f1	TRE	4.85366	1.05634	4.62993	0.636535	0.698731	0.55878	0.65145	9.22105	2.14667	8.16893	1.13686	1.24484	0.94725	1.1381
ENSMUSG00000009741	Ubp1	NRE	46.8849	20.3368	28.1001	21.2	23.8631	20.8555	22.549	47.2528	20.1842	26.4698	20.7996	22.0222	18.9451	21.4731
ENSMUSG00000009772	Nuak2	NRE	0.488749	10.7018	5.19589	12.6828	10.2422	16.3332	12.5843	0.487883	10.6029	4.90008	12.414	9.62391	15.634	11.7997
ENSMUSG00000009828	Ick	NRE	4.35141	2.02882	3.0217	1.99547	1.70137	1.9196	1.58004	8.57781	4.20082	5.95292	3.88403	3.34041	3.86934	3.28384
ENSMUSG00000009863	Sdhb	NRE	80.3901	73.2869	66.5973	79.4272	72.1738	75.3567	68.9312	63.5981	56.2227	49.6329	61.6895	54.2214	57.9377	52.5801
ENSMUSG00000009876	Cox4i2	not detected	0.179047	4.92088	0.541688	5.08446	0.870886	4.79174	0.933788	0.168002	4.3353	0.483674	4.38457	0.535014	3.94781	0.727201
ENSMUSG00000009894	Snap47	NRE	34.2764	14.4729	13.6681	17.5848	22.4824	17.8337	21.2778	49.6393	20.1684	18.4177	24.0006	29.9437	23.9354	27.7727
ENSMUSG00000009900	Wnt3a	NRE	0.467768	0.427103	0.09276	0.44406	0.139812	0.4516	0.186052	0.477372	0.399805	0.0909196	0.423705	0.135857	0.429868	0.181724
ENSMUSG00000009905	Kdsr	TRE+NRE	3.17188	3.05031	4.81382	2.95161	2.63074	2.63478	2.39464	2.8601	2.78235	4.15462	2.62927	2.14257	2.25857	2.03534
ENSMUSG00000009907	Vps4b	NRE	15.0683	15.1377	14.0064	14.4857	12.8875	13.1766	13.8688	21.9497	22.0885	19.5359	20.7657	17.5707	18.3311	19.0909
ENSMUSG00000009927	Rps25	NRE	434.603	425.138	405.688	413.576	396.169	318.804	342.063	251.094	244.287	224.071	236.437	217.175	176.867	188.527
ENSMUSG00000009941	Nxf2	TRE	1.2348	1.15691	0.294858	1.34779	1.44074	0.989402	1.57395	0.973138	0.951622	0.222241	1.09508	1.13196	0.755052	1.19187
ENSMUSG00000009995	Taz	NRE	29.1442	23.2373	28.2101	27.0708	34.3886	29.8875	35.1176	30.4402	25.8599	28.8517	28.9995	35.2138	30.452	36.1546
ENSMUSG00000010021	Kif19a	not present	0.0252836	2.18414	1.04724	2.27608	1.32604	2.08608	1.53632	0.0302314	1.90211	0.861097	1.92361	1.15639	1.74074	1.32207
ENSMUSG00000010025	Aldh3a2	NRE	54.961	26.0787	51.6764	26.2482	25.3432	26.9416	25.3752	89.8183	42.399	80.1171	42.3392	38.3101	41.8442	38.9896
ENSMUSG00000010044	Zmynd10	TRE	0.346306	5.62966	2.62677	4.54716	0.187369	2.82175	0.229414	0.293658	4.6841	2.08715	3.71194	0.165513	2.18737	0.170324
ENSMUSG00000010045	Tmem115	NRE	13.0366	11.1508	12.5438	11.3994	10.5734	12.2546	10.5673	13.4311	11.208	12.1468	11.4122	10.211	11.9776	10.2073
ENSMUSG00000010047	Hyal2	NRE	7.92332	9.20946	18.2251	6.8006	7.83203	8.48817	7.93552	7.80003	9.01078	16.9177	6.49571	7.19025	7.95197	7.24522
ENSMUSG00000010048	Ifrd2	NRE	10.9571	17.0892	15.5164	19.3395	21.8499	18.0246	19.5631	9.57223	14.7745	12.6009	16.4903	18.0089	15.0934	16.3078
ENSMUSG00000010051	Hyal1	TRE+NRE	5.96322	2.14508	7.23145	1.79464	2.56701	2.26358	2.93826	5.67277	1.94701	6.56726	1.51404	2.30701	1.99703	2.52525
ENSMUSG00000010054	Tusc2	NRE	10.5982	8.81685	10.0481	10.2021	11.3275	11.1716	12.4208	10.2664	8.39545	9.2395	9.63166	10.2275	10.2161	11.0706
ENSMUSG00000010057	Nprl2	NRE	17.6138	12.2216	13.2731	13.5483	16.9581	15.6973	16.2578	14.575	9.86495	10.0136	10.9003	12.6346	12.0423	12.4407
ENSMUSG00000010064	Slc38a3	TRE	0.503374	5.65866	0.457115	6.1558	0.650442	4.43932	0.760823	0.569255	6.06149	0.44728	6.59303	0.692049	4.57914	0.81703
ENSMUSG00000010066	Cacna2d2	TRE	0.131898	9.39037	6.02381	9.39223	0.985548	7.15797	1.15249	0.118703	8.37539	5.32489	8.35964	0.846137	6.14557	0.983006
ENSMUSG00000010067	Rassf1	TRE+NRE	17.6275	12.3381	18.9045	9.9693	10.5057	9.17143	9.05637	22.1891	15.5634	22.6309	12.2549	12.4064	10.9165	10.7421
ENSMUSG00000010080	Epn3	TRE	0.821519	4.34905	6.20384	3.35678	1.7448	4.19152	2.17689	0.911976	4.49353	6.07136	3.4678	1.75268	4.07648	2.16647
ENSMUSG00000010086	Rnf112	TRE	0.0066542	0.889109	0.11777	1.50008	0.0219145	1.1323	0.0212806	0.00382025	0.821101	0.108105	1.36478	0.0170459	0.977938	0.017611
ENSMUSG00000010095	Slc3a2	NRE	37.7814	49.4621	50.6677	50.4002	57.114	58.2202	59.6123	38.0955	49.6764	48.1972	49.7998	54.6512	55.9958	57.3721
ENSMUSG00000010097	Nxf1	NRE	51.6694	45.7057	69.0243	45.0054	50.1555	41.8992	48.3398	39.6647	34.3935	50.0503	33.7955	36.621	31.2733	35.4894
ENSMUSG00000010110	Stx5a	NRE	20.8906	15.5311	21.4646	15.788	16.8633	16.4794	17.3331	44.9283	34.3251	43.622	34.1854	35.0337	35.4813	35.3682
ENSMUSG00000010122	Slc47a1	TRE	9.09325	2.11492	2.14438	2.34886	0.64321	1.984	0.523575	9.14987	2.18049	2.00451	2.3547	0.593228	1.94339	0.495971
ENSMUSG00000010136	1700027A23Rik	TRE	0.00999355	4.94012	3.02647	3.66912	3.23856	2.97863	2.8892	0.0117953	5.02402	2.96311	3.77585	3.1201	2.99582	2.8715
ENSMUSG00000010142	Tnfrsf13b	TRE	0.66953	0.885984	1.00373	1.01715	0.315776	0.752539	0.285494	0.712255	0.946524	1.09069	1.09593	0.349844	0.881696	0.369709
ENSMUSG00000010154	Spire2	NRE	0.461136	3.7069	11.459	3.88074	2.43602	6.54279	3.5096	0.375739	3.05857	9.04674	3.17648	1.8759	5.25143	2.82071
ENSMUSG00000010175	Prox1	TRE	0.00782386	1.31089	4.89137	0.981181	0.735208	1.22816	1.04422	0.0241343	1.7228	6.03804	1.28658	1.02134	1.7672	1.45847
ENSMUSG00000010205	Raver1	NRE	21.925	20.1023	19.5841	20.7795	26.0779	20.59	27.4562	24.4637	21.8918	20.7259	22.6155	28.0916	23.0836	29.7611
ENSMUSG00000010277	2610507B11Rik	NRE	50.3877	35.568	45.822	29.9432	32.6241	29.0635	28.9086	44.0042	30.588	37.7996	25.6641	26.6169	24.1504	23.946
ENSMUSG00000010290	AI597479	NRE	9.4846	6.23966	6.50212	6.07808	6.27615	5.55489	6.0946	9.40521	6.134	6.1625	5.93632	5.74998	5.26721	5.75544
ENSMUSG00000010307	Tmem86a	TRE	1.99365	11.4838	13.424	12.3221	3.98338	11.9402	4.31776	1.9988	11.2944	12.6708	12.0722	3.71197	11.4275	4.04196
ENSMUSG00000010311	Optc	TRE	0.320697	9.75054	3.64653	7.91657	9.32933	8.00002	8.7564	0.304046	11.8315	4.04641	9.79169	10.8492	9.48434	10.1594
ENSMUSG00000010342	Tex14	TRE	0.193492	8.01981	0.426436	7.74967	7.02037	7.05257	7.01819	0.673051	11.1146	1.53991	10.7977	7.56511	8.83232	7.95388
ENSMUSG00000010358	Ifi35	NRE	81.8676	59.3898	75.9211	60.5615	82.8221	64.8341	87.8472	71.5889	50.9385	62.5322	51.6173	67.3759	53.9496	71.7912
ENSMUSG00000010362	Rdm1	NRE	5.29132	16.9564	10.2345	21.8256	10.939	17.906	10.4373	4.67401	14.4197	8.56314	18.7064	8.92227	14.735	8.60591
ENSMUSG00000010376	Nedd8	NRE	100.444	102.983	92.5431	109.65	112.885	102.711	110.539	84.1597	85.8616	74.4012	90.6955	90.5648	84.0531	87.031
ENSMUSG00000010392	Gosr1	NRE	13.93	9.59082	10.3379	9.99231	10.7436	10.4245	11.4849	12.9034	8.82131	9.17253	9.13888	9.23627	9.17644	9.97123
ENSMUSG00000010406	Mrpl52	NRE	89.7216	86.2274	88.4782	75.3793	79.2931	71.5195	70.0914	72.8906	69.0676	66.263	59.7557	57.8299	52.2931	51.8526
ENSMUSG00000010435	Spaca7	TRE	0.028523	1.31226	0.0981588	1.49603	0	1.15929	0	0.0309862	1.04118	0.0829453	1.21394	0	0.778859	0
ENSMUSG00000010453	4632411B12Rik	NRE	14.5363	24.8462	17.0839	30.8919	42.1644	32.2072	42.9624	13.6625	23.6877	15.2727	29.405	38.0753	29.5336	39.3304
ENSMUSG00000010461	Eya4	TRE	22.8607	21.7137	41.6719	13.9787	16.4866	11.4121	13.6417	20.6291	19.502	35.4316	12.3094	13.5546	9.67327	11.4374
ENSMUSG00000010476	Ebf3	TRE+NRE	0.102921	0.827832	0.237575	1.0631	0.431142	1.02866	0.474441	0.0956147	0.833342	0.217344	1.17941	0.396568	1.07477	0.445843
ENSMUSG00000010505	Myt1	TRE	0.0259233	0.77409	0.844574	0.812843	0.31676	0.970591	0.441778	0.00209399	0.789982	0.833228	0.989876	0.354972	1.0323	0.540169
ENSMUSG00000010517	Faf1	NRE	21.9027	17.337	14.8994	19.2829	20.0112	18.1597	20.5406	17.7137	13.8096	11.5062	15.3911	15.0508	14.01	15.5867
ENSMUSG00000010529	Gm266	TRE	5.07308	7.12043	5.22566	6.88579	5.49252	5.65356	4.64691	5.14625	7.16588	5.08803	6.8973	5.38212	5.52011	4.50272
ENSMUSG00000010538	1700021C14Rik	TRE	3.16546	1.80829	3.17237	2.27089	2.9532	2.00741	2.36315	4.25905	2.71494	3.96129	3.1031	3.47463	2.65509	3.12345
ENSMUSG00000010554	Mettl16	NRE	2.46695	2.14295	2.08087	2.1369	2.03095	1.75243	1.89282	10.2142	8.84086	7.78436	8.51469	7.91333	6.96816	7.23659
ENSMUSG00000010592	Dazl	TRE	0.0936224	0.803652	0.0354056	0.755458	0.237177	0.503455	0.308624	0.0972806	0.79943	0.0373488	0.71133	0.21493	0.470004	0.293931
ENSMUSG00000010601	Apol7a	TRE	0.0379676	1.78093	0.175389	2.58028	0.861409	2.41772	0.849229	0.015153	1.06452	0.156826	1.60309	0.327124	1.30192	0.34812
ENSMUSG00000010607	Pigyl	NRE	12.3056	24.4332	13.7751	22.9222	19.3755	21.7243	21.1737	13.6032	26.2916	14.2489	24.5233	19.9091	22.8023	21.4952
ENSMUSG00000010608	Rbm25	NRE	45.4961	31.393	31.3877	26.8874	24.656	20.9232	22.5034	39.9388	27.5489	26.246	23.1864	20.2125	17.6053	18.9105
ENSMUSG00000010609	Psen2	NRE	1.88748	5.97806	6.87698	7.32919	4.62323	7.57556	4.80582	1.99876	6.12531	7.02206	7.94125	4.6329	7.66086	4.91925
ENSMUSG00000010651	Acaa1b	NRE	21.1577	16.1463	11.4579	19.3401	12.2937	23.1044	14.8233	5.42218	4.60463	0.30804	5.79512	2.06724	6.45247	2.87283
ENSMUSG00000010660	Plcd1	NRE	29.5499	7.83854	15.0106	5.5457	4.79445	6.01234	4.79193	25.864	6.79155	12.3249	4.81004	3.98171	5.02672	3.90078
ENSMUSG00000010663	Fads1	NRE	7.03121	7.88786	8.29987	3.94037	1.95674	1.62693	0.988235	6.61145	7.2872	7.33092	3.69607	1.77145	1.46722	0.868344
ENSMUSG00000010721	Lmbr1	NRE	3.49807	2.8787	4.57019	3.51529	2.5959	2.83182	2.7123	3.47222	3.41172	5.99987	3.56649	3.30317	5.73334	5.33569
ENSMUSG00000010751	Tnfrsf22	TRE	3.57248	2.17442	3.35618	1.9274	1.80475	1.6389	1.80499	2.5337	1.2128	2.00758	0.914439	0.837857	0.868899	0.869495
ENSMUSG00000010755	Cars	NRE	16.3466	10.9161	10.1103	10.3782	10.4642	10.8027	9.89531	20.4093	13.2743	12.1669	12.5362	11.8954	12.2495	11.1606
ENSMUSG00000010760	Phlda2	TRE	0.0860211	1.37533	0.493387	1.79315	0.339956	1.08772	0.476844	0.0848958	1.35085	0.470262	1.72329	0.320266	1.01413	0.46632
ENSMUSG00000010796	Asz1	TRE	0.0250069	1.59723	0.0491763	1.90435	0.0494138	1.01638	0.079974	0.0135832	1.24931	0.0361505	1.50843	0.0210793	0.816746	0.0625382
ENSMUSG00000010797	Wnt2	TRE	0.0385029	1.28615	0.0757163	1.64567	0.532573	1.36669	0.818849	0.0384778	1.2106	0.0696564	1.544	0.479417	1.23748	0.740742
ENSMUSG00000010803	Gabra1	TRE	0.00450987	0.57169	0.0953385	0.482181	0.0148525	0.31283	0.00865374	0.00479976	0.549427	0.0874413	0.642959	0.0130097	0.399458	0.0361022
ENSMUSG00000010825	Grid2ip	not detected	0.145569	0.974839	0.152219	1.24688	0.200895	1.62156	0.215775	0.1595	1.00107	0.16251	1.25824	0.210371	1.61479	0.232691
ENSMUSG00000010830	Kdelr3	NRE	2.66336	2.85879	1.34334	2.34963	1.17288	1.68457	0.991678	2.32186	2.59348	1.10333	2.08673	1.00019	1.45552	0.865558
ENSMUSG00000010841	1700006E09Rik	TRE	0	0.133129	0	0.150897	0	0	0	0	0.12584	0	0.164563	0	0	0
ENSMUSG00000010911	Apip	NRE	16.557	12.7508	16.9068	9.60085	6.90739	6.38703	5.36305	13.4546	10.2209	13.3333	7.65761	5.54174	4.97181	4.12717
ENSMUSG00000010914	Pdhx	NRE	7.16343	6.87377	6.57546	7.11468	7.20502	6.81397	7.17602	11.7206	10.2288	9.99247	10.4342	10.321	10.0925	10.5632
ENSMUSG00000010936	Vac14	NRE	10.9308	15.3958	14.2241	17.1859	22.4112	19.2509	22.4766	10.5738	14.6207	13.0792	16.131	20.3062	17.7255	20.4877
ENSMUSG00000011008	Mcoln2	TRE	0.150951	0.856262	0.1332	1.48353	0.0356916	0.637646	0.0445618	0.22724	0.927519	0.113399	1.53227	0.0324289	0.659162	0.0490442
ENSMUSG00000011034	Slc5a1	TRE	0.068523	3.22478	1.99276	4.37556	0.597157	5.31587	0.964225	0.0679663	3.14035	1.80794	4.20752	0.540431	4.82412	0.882691
ENSMUSG00000011096	Akt1s1	NRE	16.9736	9.31462	10.9394	9.35702	10.055	11.661	10.7122	31.9498	17.011	19.1094	16.1784	18.6174	20.4864	18.7094
ENSMUSG00000011114	Tbrg1	NRE	60.5822	62.079	55.0607	62.1947	53.5237	60.2328	53.7635	52.3942	52.8451	45.7445	53.4377	43.1791	49.8608	43.7261
ENSMUSG00000011118	Panx3	TRE	0.00431016	0.0843822	0.00847598	0.130423	0	0.0840874	0.0055137	0.00425378	0.081372	0.00845243	0.132131	0	0.0832489	0.00536994
ENSMUSG00000011148	Adssl1	NRE	5.06271	3.50761	0.643853	3.68769	0.670923	2.69429	1.00054	4.20872	2.87588	0.480576	3.06515	0.53113	2.151	0.782384
ENSMUSG00000011154	1700026D08Rik	TRE	0.0952654	1.59703	0.768663	1.74691	2.10091	1.80181	2.20135	0.0136778	3.44554	1.46279	3.81094	5.13465	3.53104	5.73073
ENSMUSG00000011158	Brf1	NRE	21.0796	11.6302	20.3974	11.0502	12.7921	11.2762	12.3011	17.3036	9.45174	15.9333	8.93298	9.81079	8.814	9.58253
ENSMUSG00000011171	Vipr2	TRE	0.217915	0.535653	0.510707	1.04371	0.361339	1.01526	0.367623	0.176099	0.563659	0.557369	1.12061	0.338243	1.13097	0.305357
ENSMUSG00000011179	Odc1	NRE	129.422	168.876	107.257	152.487	117.239	125.469	108.809	111.659	145.54	86.4201	129.171	96.0442	103.705	88.489
ENSMUSG00000011254	Thg1l	TRE	5.5781	5.56919	4.45003	5.44783	5.05493	4.11604	4.45395	5.44797	5.43222	4.14879	5.16536	4.60424	3.82092	4.05291
ENSMUSG00000011256	Adam19	TRE+NRE	8.70976	21.5157	5.52351	14.7853	44.6296	22.4357	49.4565	8.78175	21.3972	5.3091	14.7713	41.9884	21.2745	46.0524
ENSMUSG00000011257	Pabpc4	NRE	21.9789	30.8776	23.5288	32.2895	31.2178	24.7152	27.6934	10.5078	14.3171	10.9793	14.908	13.7071	10.8688	12.2658
ENSMUSG00000011263	Exoc3l2	TRE	0.399406	1.5156	0.218177	1.23345	0.0779485	0.758896	0.0630781	0.389952	1.4871	0.195087	1.21607	0.0661593	0.697458	0.0619111
ENSMUSG00000011267	Zfp296	TRE	0.397234	4.83275	4.51959	5.87411	7.06442	6.72715	6.95082	0.380258	4.60213	4.05042	5.66933	6.44805	6.19505	6.33623
ENSMUSG00000011305	Plin5	TRE	0.097472	0.617638	0.226685	0.634068	0.20837	0.484448	0.153437	0.0793096	0.568951	0.199766	0.522981	0.176589	0.421725	0.130021
ENSMUSG00000011306	Sugp1	NRE	21.8531	19.3382	21.3145	17.94	18.1229	17.9195	18.6064	17.8185	15.9578	16.7457	14.5938	14.1006	14.2977	14.6134
ENSMUSG00000011349	Dmrtc2	TRE	0.00670352	0.131238	0	0.162276	0.0264924	0.0581242	0.025726	0.00661583	0.114451	0	0.137572	0.00988954	0.0431437	0.0167847
ENSMUSG00000011382	Dhdh	TRE+NRE	3.92141	7.8257	5.27074	10.7667	24.8814	13.412	25.4074	3.21054	6.61798	4.29453	9.29433	21.0186	11.0662	21.1631
ENSMUSG00000011427	Zfp790	NRE	3.4799	2.56451	3.48344	2.60461	2.94162	2.58678	2.9295	3.55926	2.62504	3.34631	2.63168	2.93171	2.54163	3.03887
ENSMUSG00000011463	Cpb1	TRE	0.0344858	0.397398	0.0409243	0.384341	0.035787	0.30621	0.0318227	0.0169543	0.322476	0.0266028	0.311522	0.0207572	0.248166	0.0149727
ENSMUSG00000011486	Slc25a41	TRE	0	1.13341	0.016035	1.25013	0.0751911	0.653985	0.0625852	0	1.05237	0.017849	1.20868	0.0821537	0.569789	0.0462604
ENSMUSG00000011589	Fsd1	TRE	0.0682969	0.64423	0.0976774	0.89554	0.212656	0.800792	0.22239	0.0582353	0.532336	0.0778925	0.744509	0.160945	0.651878	0.155535
ENSMUSG00000011632	2310033E01Rik	TRE	3.92433	23.9491	6.24728	18.4285	12.82	27.5454	17.7451	3.38335	20.0594	4.97131	15.5901	10.1031	22.7518	14.339
ENSMUSG00000011658	Fuz	not detected	12.8562	12.2309	14.6013	13.8307	14.8942	14.6899	15.8947	16.5367	15.8784	17.0333	17.3465	20.3743	18.3176	21.4685
ENSMUSG00000011751	Spnb4	TRE	0.158412	0.351482	0.342671	0.405966	0.236506	0.356104	0.138099	0.155669	0.435353	0.458598	0.502838	0.233189	0.422874	0.130294
ENSMUSG00000011752	Pgam1	NRE	60.0856	46.2575	37.1571	47.0877	53.7955	40.6337	52.2925	20.8548	15.4045	11.618	15.2774	16.8583	11.9609	16.5252
ENSMUSG00000011831	Evi5	NRE	10.8727	5.18414	6.33692	5.19451	4.14232	5.03387	4.66702	13.2687	6.32609	7.33148	6.24023	5.03694	6.05107	5.5142
ENSMUSG00000011832	Evi5l	TRE	8.2837	3.01247	4.9925	2.86652	2.63185	2.9029	2.5069	10.1541	4.2718	6.04098	3.99769	3.57823	3.84873	3.1915
ENSMUSG00000011837	Snapc2	NRE	26.6053	9.53185	12.699	8.7727	10.9803	9.5627	10.6627	25.3537	8.91946	11.2142	8.05423	9.54087	8.43281	9.36633
ENSMUSG00000011877	Git1	TRE	23.0997	17.0518	23.7551	15.2109	16.878	16.8505	16.9314	20.1355	14.5475	19.8032	13.1039	13.7722	13.8711	13.7277
ENSMUSG00000011884	Gltp	NRE	56.7533	41.0528	33.5565	45.6068	38.4808	59.9861	47.2134	65.7591	47.3747	37.1422	51.6857	43.7412	69.8976	53.6801
ENSMUSG00000011958	Bnip2	NRE	20.727	15.0991	18.0545	12.4654	11.443	10.3481	10.4664	27.0492	19.4038	23.3443	16.5229	14.6484	13.5976	13.3464
ENSMUSG00000011960	Ccnt1	NRE	8.96909	8.53236	7.19799	7.62892	9.06298	8.31823	8.8423	8.98272	8.51651	6.78979	7.50097	8.34672	7.88833	8.271
ENSMUSG00000012017	Scarf2	TRE+NRE	61.2954	1.41242	5.51984	0.732665	0.324736	0.263614	0.218638	56.1488	1.2463	4.79557	0.67232	0.272222	0.235874	0.189084
ENSMUSG00000012042	4930579F01Rik	TRE	0	0.173448	0	0.217023	0	0.0960236	0	0	0.151398	0	0.168225	0	0.0813731	0
ENSMUSG00000012076	Brms1l	NRE	12.7986	6.94723	8.42971	5.86166	5.1037	4.57955	4.32845	11.6071	6.1697	7.23264	5.12378	4.27016	3.91561	3.7434
ENSMUSG00000012114	Med15	NRE	19.7497	16.7705	19.3028	15.4286	18.1743	17.752	18.1171	20.8907	17.5898	19.9801	16.636	16.7971	17.5147	17.2719
ENSMUSG00000012117	Dhdds	NRE	12.4826	11.6321	11.5452	11.968	13.503	13.0761	13.5168	16.9091	17.3555	16.0297	18.2099	20.7565	21.5639	21.6018
ENSMUSG00000012123	Aim1l	TRE	0.0203324	2.58959	1.22411	3.87398	1.95555	5.19585	2.42181	0.019358	3.22559	1.09182	4.0673	2.26682	5.82787	2.78938
ENSMUSG00000012126	Ubxn11	TRE	3.63663	15.293	6.50172	19.508	21.0766	21.0594	23.5907	1.05172	12.4516	3.50126	15.2813	19.937	18.3539	22.3383
ENSMUSG00000012187	Mogat1	TRE	0.0162227	0.40494	0.0478532	0.384532	0.106854	0.307699	0.0830104	0.0187703	0.385417	0.0445482	0.332702	0.0854261	0.27717	0.0921594
ENSMUSG00000012211	Tex22	TRE	0.0170913	0.0752862	0.00840257	0.0517175	0.0450301	0.0648348	0.0218638	0.0471779	0.0844203	0.013983	0.0904375	0.109298	0.0973706	0.0396887
ENSMUSG00000012282	Wnt8a	not detected	0.00227917	0.494678	0.0737494	0.313484	0.0655077	0.271503	0.079516	0	0.438045	0.0599058	0.287519	0.0532713	0.253024	0.077819
ENSMUSG00000012296	Tjap1	NRE	33.3909	11.8327	12.8539	10.5102	15.1693	12.9268	14.4319	30.807	10.7123	11.0074	9.35699	13.2395	11.334	12.6998
ENSMUSG00000012350	Ehf	NRE	0.56276	24.3129	54.7902	24.3928	23.8807	26.4659	25.4358	0.777697	34.1134	72.6469	33.2325	36.2101	38.5573	37.5861
ENSMUSG00000012396	Nanog	not detected	1.15156	3.1202	1.61003	3.46593	2.63053	3.45419	2.55352	0.299809	1.68701	0.26191	1.56209	0.26993	1.05308	0.347285
ENSMUSG00000012405	Rpl15	NRE	63.6351	60.8357	59.3023	58.9584	55.8214	44.96	51.2791	31.6106	29.7483	29.7238	31.3497	25.8971	19.6265	23.8377
ENSMUSG00000012422	Tmem167	NRE	5.64187	7.22936	4.51858	6.97542	5.66071	5.58124	5.92278	7.89919	9.1363	5.98769	9.68371	7.23269	7.3486	7.58277
ENSMUSG00000012428	Steap4	NRE	5.5371	24.1571	38.9365	15.8869	29.2133	13.7484	25.459	5.44874	23.6836	36.7204	15.4853	26.682	13.0257	23.7971
ENSMUSG00000012429	2810021B07Rik	TRE+NRE	6.26925	5.28691	5.74463	5.21342	5.57723	4.9143	5.20716	5.53908	4.31784	4.38969	3.86834	3.53866	3.27351	3.44328
ENSMUSG00000012443	Kif11	TRE	14.374	14.2947	4.69554	15.3877	9.6782	7.39803	7.22402	12.5413	12.4148	3.91161	13.2377	8.05817	6.31456	5.95605
ENSMUSG00000012483	Rpa3	NRE	21.5764	20.74	14.9716	19.9658	17.1351	15.6429	15.7899	17.5771	17.1933	12.107	16.0842	13.0553	12.3413	12.2513
ENSMUSG00000012519	Mlkl	TRE	5.37719	5.08069	9.43113	3.78507	2.14182	3.73532	2.14626	5.06044	4.82551	8.78266	3.74071	1.99925	3.23648	1.92997
ENSMUSG00000012520	Phox2b	TRE	0	0.384516	0	0.294158	0.00392022	0.183846	0	0	0.457402	0	0.354824	0.00404573	0.21591	0
ENSMUSG00000012535	Tnpo3	NRE	30.1641	21.765	18.8336	21.4386	22.9376	19.6806	22.7343	27.0601	19.1787	16.1059	18.6148	18.8967	16.6123	18.8701
ENSMUSG00000012609	Ttll5	TRE	3.10608	5.43952	3.11544	6.35909	6.31691	6.64993	7.03938	7.24171	16.0266	7.66226	18.7262	17.8017	19.0318	21.392
ENSMUSG00000012640	Zfp715	NRE	4.09562	2.99486	4.35611	2.96139	2.72985	2.40086	2.43037	5.51662	3.91258	5.64248	3.63065	3.98128	3.6334	3.05872
ENSMUSG00000012705	Retn	NRE	0.330184	2.22206	0.382791	3.41827	1.86529	2.901	2.03646	0.279492	2.96646	0.323329	4.68226	2.22391	3.68541	2.4981
ENSMUSG00000012777	Acpt	not present	1.05928	2.68625	1.51054	2.53053	0.742598	2.03434	0.887529	0.0181084	1.39603	0.0284654	1.43049	0.0780771	1.04445	0.194056
ENSMUSG00000012819	Cdh23	TRE	0.0663762	2.52739	0.0794527	2.85607	2.57504	3.65753	2.54116	0.0627368	2.25615	0.0653022	2.49882	2.17386	3.15574	2.14724
ENSMUSG00000012848	Rps5	NRE	502.431	558.616	479.002	539.196	670.952	526.412	627.553	516.762	569.659	463.159	548.227	667.351	517.803	632.194
ENSMUSG00000012889	Podnl1	not present	0.0259641	0.274488	0.0510587	0.20951	0.00684069	0.157589	0.0199285	0.0271736	0.227646	0.0400365	0.17642	0.00766084	0.133373	0.0194089
ENSMUSG00000013033	Lphn1	TRE+NRE	3.77363	3.28568	3.35665	1.92494	2.13216	1.58267	1.43698	4.01923	3.5741	3.20978	1.92585	2.09146	1.77633	1.35077
ENSMUSG00000013076	Amotl1	NRE	66.4883	11.115	26.6072	7.20012	8.01806	6.45249	6.57485	73.36	12.2018	27.8187	8.05083	8.54201	6.91911	7.03898
ENSMUSG00000013083	2200002J24Rik	TRE	0.0325916	8.07147	0.416596	11.6372	8.28628	11.5509	12.466	0.0354061	6.84444	0.350431	9.29814	6.37167	10.0217	10.4009
ENSMUSG00000013089	Etv5	TRE+NRE	16.3747	2.58667	1.78938	1.54478	1.32412	1.80901	1.65465	17.6091	2.86066	1.65784	1.45352	1.41628	1.82611	1.48446
ENSMUSG00000013091	Tmem190	TRE	0.333368	1.1784	0.655572	1.0648	1.0491	0.923367	1.01875	0.219477	0.852725	0.44778	0.702859	0.728582	0.595371	0.787439
ENSMUSG00000013150	Gfod2	NRE	2.3609	2.44873	3.11768	1.87269	2.42789	2.38436	2.11219	3.74005	3.55109	4.66336	2.55646	3.49256	3.22842	2.76956
ENSMUSG00000013155	E130303B06Rik	TRE	8.09708	5.21998	5.33563	5.22386	4.32733	4.19839	4.14758	7.31784	4.66485	4.56815	4.5882	3.7533	3.62936	3.47266
ENSMUSG00000013158	4933405L10Rik	TRE	0.0869012	0.0567102	0.09494	0.0973921	0.101758	0.0732565	0.0741112	0.0886449	0.0574307	0.0835888	0.0692007	0.0861432	0.0621437	0.0724127
ENSMUSG00000013160	Atp6v0d1	NRE	70.4145	55.9685	54.7778	60.3926	57.785	61.2335	61.2527	60.9883	47.9069	45.2636	51.5465	47.4458	50.8112	51.0252
ENSMUSG00000013236	Ptprs	TRE+NRE	33.789	15.2462	28.6096	13.2989	20.7906	15.4881	17.3297	41.3077	19.9876	33.3495	17.7852	26.3072	20.1598	22.2841
ENSMUSG00000013275	Slc41a1	TRE+NRE	8.18653	20.3744	12.7228	26.6179	39.7651	29.1756	42.6998	7.84203	19.3479	11.5455	25.1158	35.745	26.5848	38.441
ENSMUSG00000013338	Fer1l4	TRE	0.00888715	0.601999	0.330309	0.70278	0.0561954	0.577935	0.0886761	0.00754696	0.667977	0.347841	0.843099	0.0832146	0.630455	0.0600057
ENSMUSG00000013353	4931406B18Rik	not detected	0.0557658	0.235447	0.0982463	0.356441	0.132435	0.312096	0.10468	0.0414209	0.408955	0.0770529	0.676397	0.115862	0.453537	0.072512
ENSMUSG00000013367	Iglon5	TRE	0.138851	3.78058	0.201516	6.448	1.07737	5.71872	1.4362	0.0875637	3.58889	0.139989	6.05931	0.939693	5.23612	1.23428
ENSMUSG00000013415	Igf2bp1	TRE+NRE	0.00259083	0.783654	0.0292957	1.03092	0.523895	0.943503	0.502112	0.00268575	0.743329	0.0262827	0.961258	0.455274	0.848234	0.437502
ENSMUSG00000013418	B4galnt2	TRE	0.126051	2.72071	0.762233	3.07682	4.10978	3.2447	4.2489	0.103909	2.36439	0.662391	2.52481	3.27718	2.57914	3.38523
ENSMUSG00000013419	Zfp651	TRE	7.73444	1.67571	4.61352	0.857654	1.2805	0.751068	0.864425	7.5567	1.6278	4.25362	0.82265	1.17835	0.690242	0.804071
ENSMUSG00000013465	Cobra1	NRE	28.929	21.6221	29.1123	23.4152	27.4989	26.626	28.7857	34.1689	24.8832	32.4217	27.49	32.1508	31.8509	34.5977
ENSMUSG00000013483	Card14	not detected	0.338027	6.42323	5.67688	8.3507	3.80371	10.1352	4.42318	0.0215052	5.03208	3.88318	6.61893	2.6568	7.97774	3.21805
ENSMUSG00000013495	Tmem175	TRE+NRE	10.0734	7.04275	8.18392	8.07268	9.23371	8.28445	9.27581	9.74138	7.19504	7.04458	8.41636	9.02732	8.63456	9.40247
ENSMUSG00000013523	Bcas1	TRE	0.368791	2.1935	1.65767	1.92013	0.453434	1.37424	0.422346	0.352395	2.2216	1.56772	1.87537	0.531642	1.31253	0.49193
ENSMUSG00000013539	D16H22S680E	NRE	14.7436	20.0287	9.30076	32.0421	42.9892	36.748	45.4416	14.8914	19.3726	9.03153	31.5894	39.7438	35.4835	43.7041
ENSMUSG00000013584	Aldh1a2	TRE	0.0479372	6.34654	0.438351	6.8974	0.277858	5.26317	0.423128	0.0402315	5.26354	0.365217	5.76566	0.212152	4.24288	0.353764
ENSMUSG00000013593	Ndufs2	NRE	96.7106	87.6344	73.4514	92.4418	104.063	97.9719	104.669	89.5025	78.4752	64.0053	83.038	92.8405	84.6303	93.6425
ENSMUSG00000013611	Snx31	TRE	0.0680998	3.63961	0.152873	4.61092	3.00478	3.3805	2.81357	0.125395	3.62876	0.167004	4.74965	2.85379	3.74627	2.8009
ENSMUSG00000013622	0610007C21Rik	NRE	37.1329	27.3269	32.5098	22.649	23.2885	21.8173	22.4233	46.3967	33.4417	37.7927	27.2334	29.028	25.9371	28.8186
ENSMUSG00000013629	Cad	TRE	9.77543	8.71633	9.82656	7.26943	8.76972	5.87339	6.67556	9.77115	8.09086	9.03287	6.85263	8.32784	6.04734	6.30644
ENSMUSG00000013643	2210415F13Rik	TRE	0.498697	67.3745	19.5806	223.695	169.738	335.288	247.957	0.511111	66.9281	18.6689	221.132	162.811	322.792	235.536
ENSMUSG00000013646	Sh3bp5l	NRE	8.13974	8.07346	8.7217	9.28452	12.2113	12.9485	13.6027	7.95168	7.71229	7.95954	8.76198	10.9034	11.8933	12.2251
ENSMUSG00000013653	1810065E05Rik	TRE	0.0234406	18.9414	0.126764	23.5724	0.0463187	14.5321	0.0599719	0.0127324	16.2034	0.112954	20.4923	0.047754	11.9813	0.058692
ENSMUSG00000013662	Atad1	NRE	26.0204	28.2987	25.3179	28.5621	24.2848	22.8962	24.3792	24.0349	25.7102	22.1493	25.8639	20.9405	20.1411	21.2153
ENSMUSG00000013663	Pten	TRE+NRE	36.93	23.7343	19.7455	23.2689	26.1821	20.9713	28.2819	35.9906	22.7946	18.2144	22.1917	23.7662	19.5484	26.0006
ENSMUSG00000013668	4933402N03Rik	TRE	0.116593	0.132974	0.069106	0.243654	0.0880283	0.20465	0.123821	0.088032	0.100688	0.0456255	0.230995	0.0288088	0.171901	0.0743377
ENSMUSG00000013698	Pea15a	NRE	27.3799	37.3002	41.6179	41.3164	45.0357	48.7901	50.9606	30.009	40.4854	44.3684	45.3486	48.5106	52.6356	55.0914
ENSMUSG00000013701	Timm23	NRE	55.4261	46.4708	39.4737	47.1285	43.4396	40.5384	38.8957	52.616	43.9086	35.6071	44.4466	39.8611	38.6407	35.6968
ENSMUSG00000013707	Tnfaip8l2	NRE	0.338551	0.984729	0.233018	1.27811	0.433244	1.38387	0.655816	0.320873	0.955068	0.223409	1.28148	0.437606	1.29566	0.544766
ENSMUSG00000013736	Trnt1	NRE	18.4351	16.2044	15.4114	14.0998	11.1921	10.2913	9.99596	25.9209	22.3683	19.9044	19.2602	15.9462	14.885	14.101
ENSMUSG00000013766	Ly6g6e	TRE	0.0682042	2.48832	4.39257	2.76037	1.27472	3.77928	1.76778	0.108615	3.34657	5.86419	3.76878	1.7362	5.34698	2.70981
ENSMUSG00000013787	Ehmt2	NRE	58.8379	40.7025	52.0403	40.2275	47.7744	46.5045	47.9181	62.2016	44.1238	54.6761	44.6462	47.1745	47.748	46.3223
ENSMUSG00000013822	Elof1	NRE	22.8191	26.5398	25.6276	25.2284	21.9322	24.2278	22.567	27.652	31.7904	29.7036	30.2719	24.9295	28.0433	25.9885
ENSMUSG00000013833	Med16	NRE	16.928	11.1683	14.1651	10.2894	13.7555	12.1467	13.3864	19.1969	11.3664	13.0063	9.77916	15.1535	13.0998	14.8726
ENSMUSG00000013846	St3gal1	TRE	2.82731	5.66377	10.1553	7.02508	4.26147	7.80968	4.76296	2.62257	5.17899	9.21036	6.36262	3.50522	7.01138	4.05167
ENSMUSG00000013858	ORF61	NRE	29.4547	28.2636	41.4307	26.75	31.6502	34.1672	34.1436	26.1972	24.8144	34.1656	23.024	26.6567	28.6079	29.0746
ENSMUSG00000013878	Rnf170	NRE	6.33351	5.01845	4.8837	4.5148	4.37571	4.18794	4.38059	8.56236	6.66023	6.39314	6.15854	6.68371	6.07171	6.33738
ENSMUSG00000013921	Clip3	TRE	0.136956	3.32177	0.553613	4.3898	1.28297	3.75219	1.37044	0.217012	3.63071	0.514834	4.6015	1.29422	4.27831	1.60209
ENSMUSG00000013928	Thap8	not present	0.155828	0.287127	0.189271	0.240387	0.30188	0.298046	0.269696	0.0235086	0.10301	0.0304621	0.131481	0.0537533	0.0831024	0.07791
ENSMUSG00000013936	Myl2	TRE	0.0209633	1.84391	0.00785229	2.6461	0	1.41518	0.0191549	0.0363605	4.07047	0.0160746	5.62785	0	3.01341	0.0312274
ENSMUSG00000013973	Dedd	TRE+NRE	10.0743	8.44183	9.82003	8.29502	9.60648	9.28176	9.81889	18.8331	16.1273	19.1725	16.3816	17.5879	18.7374	18.8993
ENSMUSG00000013974	1810033B17Rik	TRE	0.0671121	0.95726	0.12255	1.3055	0.328377	0.820909	0.245291	0.061539	0.783577	0.101478	1.07217	0.256603	0.688228	0.180101
ENSMUSG00000013997	Nit1	NRE	15.3012	11.9094	12.8369	12.3975	14.4003	14.2076	15.3495	24.5412	17.9275	17.0075	19.1456	21.1024	21.7076	22.8053
ENSMUSG00000014030	Pax5	TRE	0.00869293	1.01751	0.157653	1.12316	1.57279	1.59797	1.88988	0.0153027	1.64273	0.225237	1.78183	2.46523	2.47366	2.94921
ENSMUSG00000014039	Prdm15	NRE	3.11706	2.55302	3.52755	2.22001	2.54331	2.21006	2.1218	3.27658	2.5418	3.21395	2.11731	2.33192	2.02238	2.37853
ENSMUSG00000014074	Rnf168	TRE+NRE	6.51012	6.11082	6.35266	5.28527	4.67917	4.46231	4.4833	6.19039	5.6827	5.67418	4.90738	4.60583	4.15446	4.23333
ENSMUSG00000014075	Tctex1d2	TRE	9.58379	7.97412	7.50044	6.74056	3.53161	4.19702	3.29691	8.0263	6.85384	6.11034	5.74771	2.97427	3.35442	2.72939
ENSMUSG00000014077	1500003O03Rik	NRE	16.0048	28.6895	28.42	30.6838	26.4446	32.0903	28.554	19.4701	34.2638	32.4849	36.2802	29.7185	36.6656	32.4025
ENSMUSG00000014104	Sval2	TRE	0	0.444391	0.167392	1.45958	0.448535	2.0143	0.707786	0	0.486429	0.189042	1.71974	0.513868	2.24009	0.889068
ENSMUSG00000014158	Trpv4	TRE	0.738984	1.7065	4.22425	1.50431	0.331872	1.08855	0.38243	0.658978	1.52966	3.83481	1.36924	0.260379	0.998845	0.302436
ENSMUSG00000014164	Klhl3	not present	0.763635	1.21432	0.674082	1.46582	3.6724	1.76434	3.61956	0.39621	0.879231	0.297468	1.0409	3.02718	1.30104	2.98727
ENSMUSG00000014177	Fam18b	NRE	21.4809	26.3568	17.281	27.1524	33.2983	31.2468	35.4636	19.2846	23.4163	14.7907	24.0189	27.0593	25.9972	29.1546
ENSMUSG00000014195	Dnajc7	NRE	56.2247	63.3783	47.9712	58.3436	56.9404	52.7789	55.7914	65.7561	67.8321	50.8943	60.3004	56.4882	52.2987	52.3878
ENSMUSG00000014198	Zfp385c	not detected	3.0561	4.03061	3.21244	4.42034	3.21995	4.36128	3.54661	0.102481	1.66023	0.164537	1.82902	0.0158366	1.33804	0.064054
ENSMUSG00000014226	Cacybp	NRE	52.8049	31.617	35.7065	31.6526	27.1763	22.9466	23.6077	48.5004	28.7736	30.6207	28.2578	23.1047	20.0386	20.2517
ENSMUSG00000014232	Cluap1	NRE	15.6748	11.4703	12.214	11.1322	10.3245	9.44018	9.67341	14.1375	10.1345	10.9545	10.588	8.41053	7.67314	7.85674
ENSMUSG00000014243	Zswim7	TRE	1.88296	1.91575	3.2801	1.94412	1.09376	2.0569	1.40352	1.52971	1.63083	2.72895	1.58318	0.88635	1.82631	1.16912
ENSMUSG00000014245	Pigl	NRE	3.75751	4.69465	4.86095	5.65717	6.93471	6.31217	7.20384	3.19213	3.59193	3.7228	4.06857	4.76136	4.34703	5.10264
ENSMUSG00000014294	Ndufa2	NRE	112.797	96.6175	87.1654	90.8032	107.647	111.803	99.8876	99.9447	82.8959	71.9488	77.1948	89.7272	94.6426	83.2127
ENSMUSG00000014301	Pam16	NRE	36.1463	28.119	23.2941	34.7508	30.921	29.6638	33.8468	30.1798	22.3054	17.7777	28.12	23.7317	23.2341	25.974
ENSMUSG00000014303	Glis2	TRE+NRE	8.64088	4.50492	7.47571	2.51838	3.60161	2.10511	2.51117	11.5995	6.01793	8.65136	3.11076	4.08364	2.72563	3.1714
ENSMUSG00000014313	Cox6c	NRE	101.815	114.823	120.668	120.301	91.9076	99.8558	96.5194	181.359	202.493	201.479	208.224	151.559	169.459	159.837
ENSMUSG00000014329	Bicc1	TRE+NRE	8.91749	1.17074	0.568622	0.943934	0.219625	0.714314	0.236182	8.87413	1.15849	0.549543	0.937202	0.179966	0.761775	0.215323
ENSMUSG00000014349	Ube2z	NRE	44.6067	36.1398	36.5738	31.6301	41.8896	31.8219	42.0117	43.3798	34.7215	33.3519	30.0958	37.7715	29.4242	38.2495
ENSMUSG00000014351	Gip	TRE	0.315953	43.4072	0.667925	45.3969	0.270541	48.9693	0.666893	0.274436	36.9372	0.555609	39.5186	0.218551	40.5783	0.558414
ENSMUSG00000014353	Tmem87b	NRE	15.9634	6.998	10.636	6.22177	4.59885	4.9832	4.26751	15.78	7.05419	9.59543	5.91998	4.1493	4.56596	3.77463
ENSMUSG00000014355	Anapc1	TRE+NRE	19.3048	13.1306	14.9118	11.5042	11.3359	9.64438	9.85582	18.9374	12.6711	13.8087	10.7959	11.1307	9.23925	9.6958
ENSMUSG00000014361	Mertk	NRE	1.13273	0.528963	0.146352	0.752439	0.0318488	0.43065	0.0338858	1.01042	0.451994	0.128479	0.652264	0.0253424	0.373139	0.0221237
ENSMUSG00000014372	Cyp2d10	TRE	0.0169132	0.81669	0.215804	1.0381	0.0392283	1.01293	0.111631	0	0.3915	0.0637277	0.491809	0	0.395551	0.0330785
ENSMUSG00000014402	Tsg101	NRE	22.2775	29.568	33.1127	30.7259	26.0369	27.8453	26.3468	23.2424	29.996	32.8269	31.689	26.2888	28.1346	28.5452
ENSMUSG00000014418	Hps5	NRE	8.36811	7.98091	7.38363	8.93446	8.50087	9.71048	8.77387	12.0717	10.5096	9.83674	12.6455	13.168	14.9774	14.5887
ENSMUSG00000014426	Map3k4	NRE	19.5963	10.0384	17.84	8.13246	9.28734	8.01318	8.26801	15.4938	7.75589	13.2483	6.24606	6.79353	5.92486	5.96404
ENSMUSG00000014444	Fam38a	NRE	1.56581	10.0122	3.97202	10.4739	10.1247	14.4413	11.5366	1.30493	8.97198	3.17011	9.31129	8.55344	12.7145	9.88224
ENSMUSG00000014453	Blk	TRE	0.092086	4.26236	0.349241	5.31642	10.3863	6.25453	10.5739	0.0961139	3.75828	0.27521	4.67625	8.77024	5.28534	8.97014
ENSMUSG00000014470	Rnf166	NRE	13.5799	7.68625	11.7306	6.91931	7.75392	7.17121	7.61529	12.6035	6.94312	10.3108	6.25684	6.79921	6.31509	6.60613
ENSMUSG00000014496	Ankrd28	NRE	7.91147	8.05381	6.35949	7.32904	4.8357	4.99067	4.52904	6.95333	7.09137	5.1868	6.3068	3.86144	4.12925	3.66422
ENSMUSG00000014498	Ankrd52	not detected	19.8608	14.2384	16.7309	11.1796	15.0053	12.5514	12.9775	18.5552	13.9639	15.3289	10.3263	14.9444	12.5237	12.8577
ENSMUSG00000014503	Pkd2l2	TRE	4.54971	11.1985	15.51	13.5416	14.4391	10.9706	11.8753	1.21503	3.04284	5.09693	3.82925	3.7007	2.82867	3.54147
ENSMUSG00000014504	Srp19	NRE	33.5045	27.0067	23.8321	28.4216	24.2621	23.4005	24.0441	41.7047	32.9332	26.9174	34.9299	29.6352	29.3796	29.3038
ENSMUSG00000014529	4930511M11Rik	TRE	0.0488141	0.16776	0.112333	0.156645	0.166375	0.0987418	0.182368	0.0204956	0.129829	0.0683824	0.126855	0.0671644	0.0679893	0.110497
ENSMUSG00000014542	Clec4f	TRE	0.0219607	5.52467	0.0820534	8.84699	0	6.29322	0	0.0177755	5.09745	0.0717386	8.21459	0	5.4932	0
ENSMUSG00000014543	Klra17	TRE	0	0.101026	0.0160229	0.131494	0.021467	0.061817	0.0885958	0	0.0905925	0.00873193	0.132464	0.0400742	0.0729348	0.27976
ENSMUSG00000014547	Wdfy2	not present	6.54094	7.248	8.3152	6.60841	19.8069	10.944	22.3337	5.22254	5.85069	6.39707	5.24618	15.2743	8.39174	17.2147
ENSMUSG00000014550	Zfyve20	TRE+NRE	7.73103	6.08578	5.88836	5.39756	5.17492	5.19603	5.05542	7.951	6.16958	5.75496	5.3946	4.98221	5.14726	4.9956
ENSMUSG00000014551	Mrps25	NRE	12.3506	9.30471	10.5922	8.60176	7.97132	7.56753	8.28026	6.49774	4.1135	4.47686	4.35205	3.40847	3.6697	3.71885
ENSMUSG00000014554	Dguok	NRE	26.0099	10.4126	19.5495	11.8072	12.1144	9.81835	12.2155	22.1192	8.82152	15.8488	9.80149	9.52724	8.16013	9.82369
ENSMUSG00000014592	Camta1	TRE+NRE	6.80731	3.60432	8.30502	3.99614	4.87765	3.68649	5.19169	11.3821	5.80588	12.2726	5.98668	8.28096	5.9916	8.32366
ENSMUSG00000014599	Csf1	TRE	10.5369	13.2407	16.6715	13.2342	11.8857	16.3966	13.2857	17.0965	22.0099	26.2483	23.2857	18.6827	25.9159	20.4203
ENSMUSG00000014601	Fam40a	NRE	18.6722	16.062	22.6014	14.7126	13.9765	13.2396	12.2972	15.773	13.2556	18.0554	12.2584	11.1382	10.7561	10.0145
ENSMUSG00000014602	Kif1a	TRE	0.0400316	3.33454	0.675704	3.43323	2.16198	3.12158	2.41277	0.0357376	3.47518	0.690472	3.58365	2.24382	3.19276	2.52749
ENSMUSG00000014606	Slc25a11	NRE	32.4924	43.0365	35.9084	45.1799	47.0499	45.8984	49.4018	37.5343	50.379	35.5761	50.6898	54.4999	54.2455	57.3581
ENSMUSG00000014609	Chrne	TRE	0.0134319	2.52445	0.138674	2.93317	3.93257	3.39202	4.35577	0.0134642	2.18229	0.118642	2.56603	3.26181	2.92151	3.6566
ENSMUSG00000014633	2310061C15Rik	TRE+NRE	8.52065	4.61563	3.27309	5.50621	4.81324	4.42967	3.90733	14.6039	7.51702	5.70066	9.29001	8.14123	7.88156	7.12248
ENSMUSG00000014668	Chfr	NRE	13.9167	16.7833	15.7322	16.6923	14.8158	17.4708	14.3078	13.0363	15.5654	13.9691	15.2582	13.0616	15.9975	12.5449
ENSMUSG00000014686	Ceacam16	not present	0.0730171	1.19557	1.26293	1.25872	0.944392	1.51083	1.06992	0.052038	0.933474	0.726435	0.880281	0.572878	0.971234	0.497043
ENSMUSG00000014704	Hoxa2	NRE	8.16491	1.29101	3.58348	0.50774	0.424402	0.214939	0.144888	8.71899	1.40954	3.61824	0.542488	0.438004	0.211066	0.146662
ENSMUSG00000014725	Adam28	TRE	11.5007	3.29554	10.6456	1.07738	0.766853	0.779699	0.582634	10.6857	3.11145	9.43443	0.92296	0.588504	0.636785	0.381637
ENSMUSG00000014747	Ankrd53	not present	0.149783	0.281018	0.196366	0.308451	0.205536	0.216453	0.103787	0.119576	0.268373	0.151322	0.265871	0.176243	0.167167	0.0624303
ENSMUSG00000014748	Tex261	NRE	15.7109	13.9741	15.3299	13.6955	12.6697	12.0858	12.5123	15.2324	13.2955	13.9689	12.8033	11.249	11.0258	11.1907
ENSMUSG00000014763	Fam120b	TRE+NRE	8.56853	8.07477	10.4209	9.59972	9.98705	10.2554	9.80571	7.86731	7.34636	8.88661	8.62074	8.47484	8.9166	8.42383
ENSMUSG00000014767	Tbp	TRE	2.89544	2.39979	2.72058	2.62548	2.58404	2.33233	2.48877	14.089	11.1087	10.7764	11.4025	11.1829	9.94496	11.8079
ENSMUSG00000014769	Psmb1	NRE	284.76	199.584	146.682	199.31	180.664	171.221	186.154	239.897	164.285	116.527	161.598	143.005	138.193	146.436
ENSMUSG00000014771	Pdcd2	NRE	6.67052	4.82196	5.59573	5.27152	4.78138	4.16118	4.31382	11.3356	7.92146	8.73658	8.55826	7.31452	6.69625	6.79787
ENSMUSG00000014773	Dll1	TRE	13.1836	3.81813	9.1187	2.80015	2.53522	3.28809	2.1905	12.1023	3.49873	7.8465	2.49956	2.2227	2.89752	1.93745
ENSMUSG00000014776	Nol3	TRE	2.28493	2.34163	4.77863	2.56462	3.08004	2.83214	2.65599	1.50953	0.815833	2.58908	1.08822	1.23326	1.10238	1.03335
ENSMUSG00000014778	Fhod1	NRE	1.5225	1.3827	3.55163	1.86734	2.26226	2.22748	2.12924	1.28049	1.14263	2.77547	1.52537	1.77513	1.79266	1.67349
ENSMUSG00000014782	Plekhg4	TRE	0.159634	0.23028	0.0309791	0.322029	0.0276699	0.216272	0.0107478	0.196121	0.320472	0.0325001	0.361328	0.0266489	0.331468	0.00404957
ENSMUSG00000014786	Slc9a5	TRE	0.467622	0.362126	0.492488	0.371045	0.418891	0.295086	0.284476	0.433771	0.314997	0.427103	0.330188	0.34485	0.258474	0.239326
ENSMUSG00000014791	Elmo3	NRE	23.4078	12.1375	22.0118	13.5119	15.0627	17.6216	16.9179	24.9113	12.5108	21.3392	13.9419	14.9788	17.4123	17.1928
ENSMUSG00000014813	Stc1	TRE	0.585705	4.03547	1.55596	3.17773	1.86653	2.37024	2.15431	0.587959	3.95584	1.45104	3.10693	1.70209	2.25301	2.02628
ENSMUSG00000014837	4931428F04Rik	TRE+NRE	2.06556	3.21036	5.40698	3.33198	4.04147	3.66851	3.61884	1.30484	2.72022	3.95916	2.6971	2.99021	2.80284	2.72546
ENSMUSG00000014846	Tppp3	NRE	5.0159	11.759	23.0607	14.4629	8.58163	18.4554	11.0119	8.76781	20.678	38.1795	25.129	14.4343	32.8963	19.0558
ENSMUSG00000014850	Msh3	NRE	3.70306	2.21137	2.80855	1.94536	1.36048	1.45222	1.23268	8.49393	5.14686	5.80821	4.46362	2.70638	3.33296	2.44937
ENSMUSG00000014852	Adamts13	not present	1.33622	7.35638	3.21175	10.0246	17.2234	15.0523	18.7034	0.0525109	5.40728	1.41301	8.96563	16.8174	14.203	18.2168
ENSMUSG00000014856	Tmem208	NRE	11.8885	13.6961	14.4204	14.5581	12.5311	14.4426	13.3803	16.1648	18.7338	18.4742	19.5999	16.1391	18.8749	17.5459
ENSMUSG00000014859	E2f4	TRE	26.6791	20.5909	20.7109	18.586	21.6062	19.6146	21.201	22.8541	17.1725	16.5568	15.2593	17.3114	16.155	17.3969
ENSMUSG00000014867	Surf4	NRE	47.9801	96.0473	57.8317	106.69	121.327	122.021	130.884	55.7969	117.514	66.5025	127.418	152.76	156.916	164.413
ENSMUSG00000014873	Surf2	NRE	16.92	16.2402	16.4282	16.1155	16.567	14.4665	17.1841	12.1056	9.51067	11.0819	10.0459	10.4093	8.68862	10.4014
ENSMUSG00000014905	Dnajb9	NRE	17.5394	33.7452	24.1005	41.0464	39.1961	40.6624	47.8217	17.1548	33.0577	22.418	39.751	35.5349	38.0996	43.7608
ENSMUSG00000014907	Naf1	NRE	11.4918	7.19144	5.83172	6.08485	5.87661	4.99628	5.60911	11.6746	7.23065	5.61608	6.11761	5.30925	4.66873	5.06408
ENSMUSG00000014932	Yes1	NRE	13.5274	12.7194	8.17573	12.1291	11.483	9.83396	11.7996	15.943	14.6566	9.23894	13.8633	13.4951	11.4044	13.2059
ENSMUSG00000014956	Ppp1cb	NRE	42.9659	68.4759	56.9498	63.3197	53.3303	49.6663	52.3391	40.2431	63.7549	50.3453	58.2258	45.6447	43.3508	45.677
ENSMUSG00000014959	Gorasp2	NRE	35.4094	30.1177	27.2381	31.3331	27.8061	28.8229	28.4016	49.4369	42.5721	35.0584	43.3523	37.703	40.1044	39.5795
ENSMUSG00000014980	Tsen15	NRE	18.3054	7.17312	7.42185	7.57489	6.22105	5.32601	5.7225	17.1444	6.39034	6.64442	6.89294	5.45677	4.80419	5.01125
ENSMUSG00000015001	Oc90	not detected	0.0113466	1.59383	0.0725177	1.50498	0.00747363	0.866998	0	0.0139932	1.45362	0.0648203	1.33473	0.00995702	0.732849	0
ENSMUSG00000015002	Efr3a	NRE	24.6725	13.8839	12.1082	12.399	12.7805	11.2839	12.622	29.9676	16.9088	13.9837	14.5712	15.4238	13.9531	15.7253
ENSMUSG00000015013	Trappc2l	NRE	28.3215	29.4384	32.5939	36.7721	41.2188	43.9122	40.3925	24.0089	24.259	25.8894	30.0359	32.0134	34.3637	32.7477
ENSMUSG00000015016	Acsf3	TRE	8.62434	10.4455	9.18618	12.3066	14.809	13.9598	15.117	8.0445	9.51647	7.9993	10.9273	12.7878	12.1614	13.2538
ENSMUSG00000015023	Ddx19a	NRE	21.8423	19.8543	18.2652	17.9783	19.9468	16.6075	18.8847	13.7635	11.7924	10.6533	11.0464	10.6242	9.14363	10.2158
ENSMUSG00000015027	Galns	TRE	1.9133	4.24608	3.80379	4.27765	3.18005	3.96304	3.37441	1.82387	3.88943	3.34655	3.80191	2.65279	3.53215	2.97526
ENSMUSG00000015053	Gata2	TRE	0.0194324	2.27628	0.359849	1.68891	0.0639975	1.28125	0.0662894	0.0212015	2.30881	0.345935	1.72499	0.0623373	1.24069	0.0669955
ENSMUSG00000015083	C8g	TRE	2.28463	2.02262	2.09131	2.58989	3.65949	3.49731	4.16919	2.76527	2.32196	2.2656	2.9274	3.77232	3.77558	4.51195
ENSMUSG00000015085	Entpd2	NRE	7.23906	6.50476	7.06826	6.9626	4.0448	6.61928	4.52271	6.61276	5.92845	5.94106	6.21122	3.39411	5.66622	3.97471
ENSMUSG00000015087	B230208H17Rik	NRE	19.9487	15.4258	19.3206	14.5224	14.0005	14.0026	13.5482	17.1166	13.0141	15.7741	12.1428	11.5307	11.6219	11.1281
ENSMUSG00000015090	Ptgds	NRE	0.289259	49.6358	3.58363	54.962	2.27869	63.5861	2.30898	0.312515	45.7237	3.11837	49.8186	2.08314	55.9334	2.0491
ENSMUSG00000015092	Edf1	NRE	154.527	154.176	137.293	184.778	213.05	222.029	228.174	127.387	123.578	102.801	144.385	164.394	175.879	178.098
ENSMUSG00000015093	Clic3	TRE	1.5984	20.5506	11.0212	18.6422	11.3598	31.1688	16.186	1.34205	16.8585	8.53097	15.0431	8.46095	24.4139	12.2515
ENSMUSG00000015094	Npdc1	NRE	2.61996	18.642	37.3319	24.9689	25.5408	26.7556	25.4475	3.32867	24.6313	46.007	33.3246	31.0981	35.3674	32.3993
ENSMUSG00000015095	Fbxw5	TRE	22.3895	19.7165	26.3068	21.3005	26.1312	25.1508	27.5039	23.6364	20.8027	25.9833	22.7567	24.8138	24.3518	26.9185
ENSMUSG00000015112	Slc25a13	TRE	65.7271	29.0221	14.0639	30.4879	53.8282	34.8123	58.2522	58.8112	25.8399	12.0272	26.8152	44.5154	29.323	48.3548
ENSMUSG00000015120	Ube2i	NRE	40.6415	35.0017	36.3486	31.0401	28.9642	26.2115	27.0045	153.62	133.007	124.74	116.692	103.149	95.6909	96.9257
ENSMUSG00000015126	0610007P22Rik	NRE	25.6736	12.6445	13.5092	12.4779	12.1629	12.53	12.2738	27.5944	13.2162	13.8791	13.2634	12.3578	12.6566	12.1194
ENSMUSG00000015127	Unkl	NRE	15.141	4.70336	5.28427	4.95918	6.11309	5.37944	6.64594	23.0092	5.88858	5.58806	6.67883	8.20242	7.0036	9.02367
ENSMUSG00000015133	Lrrk1	NRE	11.5713	31.5631	19.7992	30.6217	46.8777	34.8228	47.5129	11.649	30.2898	17.9032	29.8985	45.2101	33.5595	45.6037
ENSMUSG00000015134	Aldh1a3	TRE	11.673	14.3023	6.48153	20.3508	12.124	14.966	12.0114	11.4505	13.7893	6.4763	20.3027	13.8414	16.118	13.7977
ENSMUSG00000015143	Actn1	TRE+NRE	108.717	90.3967	142.961	78.8645	150.802	86.508	139.781	111.017	89.0523	135.1	76.8163	147.522	84.7233	136.888
ENSMUSG00000015149	Sirt2	TRE+NRE	29.1627	20.9395	25.4495	22.3286	26.6755	26.2724	27.9458	23.3617	16.2729	19.4401	17.8389	20.1236	19.912	20.9148
ENSMUSG00000015165	Hnrnpl	NRE	102.855	93.6558	88.6272	84.6165	90.3622	80.6729	83.9749	150.413	135.604	120.007	120.497	119.281	107.302	109.607
ENSMUSG00000015176	Nolc1	TRE+NRE	17.5712	22.2619	17.136	21.7989	22.5963	17.0309	19.6027	18.8005	24.9728	17.8185	23.6579	23.9788	18.2382	21.0249
ENSMUSG00000015189	Casd1	NRE	8.19556	8.02775	9.7396	9.0552	8.2712	7.54584	8.33497	7.31612	7.14671	8.35452	7.93989	7.01139	6.465	7.13818
ENSMUSG00000015202	Cnksr3	NRE	11.0114	4.58783	13.1882	3.1183	2.07171	3.05952	1.7983	11.285	4.6823	12.9083	3.14062	1.95788	2.9552	1.71003
ENSMUSG00000015214	Mtmr1	NRE	12.0477	11.8559	9.33004	11.8633	10.8705	11.2891	11.1987	13.3499	13.047	10.1853	12.4235	11.7277	11.7907	11.8082
ENSMUSG00000015217	Hmgb3	NRE	14.7641	15.1577	17.541	11.4607	7.68245	6.03253	5.45196	5.24682	5.46243	6.13503	4.12335	2.48398	2.29919	1.83477
ENSMUSG00000015222	Mtap2	TRE+NRE	0.792433	7.73986	13.2551	5.71508	5.77853	5.29357	4.43711	1.93567	17.5614	28.7457	13.2322	15.8084	14.3763	12.2053
ENSMUSG00000015224	Cyp2j9	TRE	2.32564	1.9748	6.49688	2.42225	1.23002	2.82513	1.62519	2.10662	1.74207	5.53422	2.0622	1.03674	2.3811	1.38656
ENSMUSG00000015242	Nipsnap3a	TRE	0	0.0957708	0.00687138	0.112782	0	0.0530201	0	0	0.0691223	0	0.078992	0	0.0449308	0
ENSMUSG00000015243	Abca1	NRE	2.17969	4.18137	17.497	4.86966	3.68084	4.80167	3.75566	1.95702	3.72276	14.7448	4.35124	2.99061	4.0371	3.1766
ENSMUSG00000015247	Nipsnap3b	NRE	10.7551	14.724	15.4568	16.4062	12.0033	13.5061	12.1302	12.9703	17.1283	17.7701	19.2603	13.8995	15.8567	13.6615
ENSMUSG00000015289	Lage3	NRE	7.85475	7.09946	7.34346	7.04188	6.99083	6.82701	6.73904	16.2884	14.4003	13.5749	13.4254	12.4565	12.7637	12.4062
ENSMUSG00000015290	Ubl4	NRE	18.3505	16.5098	13.6865	16.6579	14.8708	14.9276	14.452	17.3843	15.132	12.2647	15.2745	12.5746	13.0303	12.5748
ENSMUSG00000015291	Gdi1	NRE	57.6349	64.7961	71.3087	75.3481	78.3809	79.3933	82.8949	64.7329	71.9277	76.0866	87.2573	82.1935	83.3209	90.8533
ENSMUSG00000015305	Sash1	NRE	8.68884	2.87421	5.97677	2.29819	1.22649	1.89406	1.0839	8.21331	2.65399	5.36572	2.12529	1.06692	1.67918	0.932264
ENSMUSG00000015312	Gadd45b	NRE	15.3622	116.005	36.6751	140.502	153.744	147.984	162.895	13.7133	105.786	32.2975	127.538	133.104	127.741	140.838
ENSMUSG00000015314	Slamf6	TRE	2.09352	3.12418	0.152338	2.0081	3.5513	2.42856	3.65916	3.01505	4.52412	0.222689	2.87126	4.81323	3.44506	5.18191
ENSMUSG00000015316	Slamf1	TRE	0.600481	1.96063	0.138691	3.756	4.65066	3.78265	5.46988	0.571377	1.76196	0.120741	3.47219	4.08774	3.34654	4.81256
ENSMUSG00000015335	Zdhhc12	TRE	3.75404	6.31086	6.05618	7.0742	6.22461	6.00327	6.23434	3.45893	5.81501	5.23774	6.27026	5.44131	5.42108	5.40092
ENSMUSG00000015337	Endog	TRE+NRE	8.25971	6.26629	6.53527	7.09539	6.54329	7.98394	5.62262	2.91493	2.55813	2.51659	3.14296	2.37862	4.05391	2.38078
ENSMUSG00000015340	Cybb	TRE	0.202737	11.5593	3.24827	25.1398	26.2945	30.448	31.1707	0.184232	11.904	3.16489	25.5321	27.2129	32.7576	34.0813
ENSMUSG00000015341	Golga7	NRE	27.4149	27.0378	23.4593	27.0165	22.5726	24.9682	24.1884	29.0969	28.2103	23.3935	28.0416	21.7801	24.7157	23.8256
ENSMUSG00000015342	Xk	TRE	1.96525	1.59877	1.58509	1.5206	1.06784	1.23993	1.17093	1.99033	1.5945	1.50095	1.51557	0.985744	1.17739	1.09525
ENSMUSG00000015354	Pcolce2	TRE	1.04155	1.60983	3.23075	1.80327	1.20517	2.03164	1.53731	0.926096	1.46238	2.76254	1.6039	1.01372	1.7585	1.31552
ENSMUSG00000015355	Cd48	NRE	0.903655	0.48249	0.224375	0.865439	0.456928	0.504548	0.560477	0.881573	0.450596	0.213226	0.801852	0.424204	0.495046	0.49616
ENSMUSG00000015357	Clpx	NRE	28.2644	24.5089	20.1519	27.9855	24.7697	29.6559	26.4248	24.604	21.0787	16.5958	23.9601	20.4911	24.649	21.9417
ENSMUSG00000015363	Trabd	NRE	9.5603	12.6161	13.1031	11.9151	18.2336	17.9291	18.0647	13.8265	17.5899	17.1257	16.1545	24.1737	24.3352	24.4841
ENSMUSG00000015365	Mov10l1	TRE	0	0.262187	0.00516393	0.296649	0.0415109	0.184996	0.00671836	0	0.32208	0.0166025	0.322677	0.0328878	0.260995	0.0032716
ENSMUSG00000015377	Fam116b	TRE	3.71217	2.75045	5.76406	2.70821	2.72413	2.56037	2.92855	2.82313	2.08446	4.25279	2.05207	1.95333	1.83552	2.09232
ENSMUSG00000015396	Cd83	NRE	289.985	15.0526	1.24927	18.729	27.0162	18.664	25.6454	299.984	15.3656	1.20289	18.8262	25.939	18.3957	24.9363
ENSMUSG00000015401	Tmem27	TRE	0.0351457	1.94722	0.0829373	2.07026	0.0277792	1.02087	0.0269757	0.0408875	1.97023	0.082964	2.0052	0.0372948	1.14483	0.0292041
ENSMUSG00000015405	Ace2	TRE	0.14136	2.57262	1.59416	3.25613	0.429444	3.30499	0.656901	0.138577	2.53098	1.56558	3.37317	0.420088	3.34022	0.578311
ENSMUSG00000015437	Gzmb	TRE	0.145421	8.85559	0.0602046	9.09023	0.0201651	5.88974	0.0293727	0.115587	8.04314	0.0442576	8.22924	0.0225827	5.26484	0.0190712
ENSMUSG00000015441	Gzmf	TRE	0.015972	3.04777	0.0608552	2.40646	0	1.64997	0.00510798	0.0118223	2.41753	0.0348352	1.75793	0	1.16781	0
ENSMUSG00000015443	Gzmn	TRE	0	1.06148	0.0161686	0.951862	0	0.433682	0	0	0.883351	0.0107842	0.711082	0	0.33741	0
ENSMUSG00000015452	Ager	TRE	1.62716	3.0116	1.82126	3.53742	5.15068	4.18208	6.0374	1.41853	3.02839	1.6183	3.37018	5.88825	5.23366	5.57384
ENSMUSG00000015461	Atf6b	NRE	23.8513	28.2941	28.3337	28.3343	33.7466	31.8123	34.3232	25.6128	31.4707	27.9848	28.5647	35.2876	34.7127	35.2901
ENSMUSG00000015467	Egfl8	TRE	1.17673	2.70565	1.97277	2.42505	1.68397	2.14705	1.21291	0.457743	1.39252	0.682165	1.11862	0.223152	0.869827	0.177329
ENSMUSG00000015468	Notch4	TRE	0.158077	0.999348	0.221812	1.22075	0.652922	1.18503	0.699335	0.157708	0.902549	0.170837	1.12935	0.588083	1.0567	0.609859
ENSMUSG00000015474	Ppt2	NRE	4.57121	4.20031	4.511	4.17941	3.51957	4.60346	3.77096	7.48899	7.14216	6.89366	6.6631	4.89225	6.93995	5.87344
ENSMUSG00000015476	Prrt1	TRE	2.82513	0.399758	0.407048	0.451418	0.346372	0.454751	0.393604	2.77612	0.393269	0.361326	0.434663	0.32854	0.425637	0.343013
ENSMUSG00000015478	Rnf5	NRE	15.6571	25.5553	23.0148	29.1091	31.0886	34.405	33.4191	13.5495	22.7624	19.1824	25.5268	25.5609	28.4766	27.6458
ENSMUSG00000015484	Fam163a	TRE	0.0733877	3.4523	0.985483	3.88865	3.05681	4.50123	3.63896	0.0745179	3.44215	0.937828	3.85164	2.87187	4.36774	3.45183
ENSMUSG00000015488	5930434B04Rik	TRE+NRE	10.1037	12.0786	12.8585	12.3945	20.4053	16.0564	19.4091	18.2024	21.328	21.6438	22.1379	34.4054	28.0756	33.8181
ENSMUSG00000015501	Hivep2	TRE+NRE	8.70595	2.80115	5.97267	2.43687	1.50788	2.51253	1.57941	8.75278	2.80883	5.7158	2.41642	1.42019	2.42371	1.51309
ENSMUSG00000015519	2310057J18Rik	TRE	0.018531	0.783023	0.151839	1.24609	0.476026	1.12139	0.746722	0.0155718	0.909516	0.166358	1.57794	0.514718	1.32414	0.880534
ENSMUSG00000015522	Arnt	NRE	22.8158	15.5112	13.1411	15.4526	18.6592	16.6795	19.5567	28.6523	19.5607	15.0228	18.9534	26.3959	22.4228	26.9325
ENSMUSG00000015533	Itga2	not detected	0.0772638	1.8202	0.648278	2.49903	1.51995	2.04608	1.98336	0.06179	1.43719	0.503995	1.97837	1.14776	1.62559	1.54782
ENSMUSG00000015536	Mocs2	TRE+NRE	29.4014	21.8376	20.8079	25.8872	19.8524	28.818	22.7513	34.0333	25.5304	22.9781	30.9533	23.3149	34.5227	26.2739
ENSMUSG00000015542	Nat9	TRE	17.1441	16.4258	13.4245	18.3042	27.2358	23.8004	27.6671	15.4278	14.3376	11.2616	15.7252	22.743	20.1536	23.2785
ENSMUSG00000015568	Lpl	NRE	11.6001	12.7603	7.18501	16.1563	8.42634	15.8253	11.3215	11.054	11.8627	6.4537	14.9669	7.18582	14.0079	9.95219
ENSMUSG00000015575	Atp6v0e	NRE	14.5254	24.4666	19.7103	37.1153	38.8678	40.2958	45.761	49.0911	84.7548	62.5936	126.489	123.348	132.559	146.888
ENSMUSG00000015579	Nkx2-5	TRE	0.0213501	0.327419	0	0.297899	0.00937511	0.177408	0.0182079	0.0224862	0.320772	0	0.28446	0.0104991	0.167535	0.0179054
ENSMUSG00000015597	Zfp318	TRE	24.077	13.2415	8.62155	13.6074	32.4507	16.4661	32.2663	29.6265	15.2815	9.28747	16.2129	38.9549	19.2835	39.307
ENSMUSG00000015599	Ttbk1	TRE	0.0775938	1.48974	0.0860685	1.55875	0.506558	1.73946	0.510885	0.0634391	1.40574	0.0674529	1.45937	0.421354	1.5671	0.433296
ENSMUSG00000015605	Srf	TRE+NRE	24.0659	15.9135	26.3327	11.34	16.351	15.3898	16.5903	22.9813	15.085	23.4552	10.5527	14.892	13.8629	14.9115
ENSMUSG00000015619	Gata3	TRE	1.18551	3.46207	2.1728	3.40316	2.62036	4.21792	3.26507	1.31979	4.02723	2.4057	3.85667	2.8109	4.85511	3.60226
ENSMUSG00000015627	Gata5	TRE	0.145775	1.15365	0.193753	1.82385	0.228617	1.08706	0.169863	0.109863	1.0758	0.133389	1.71383	0.164951	0.978589	0.128593
ENSMUSG00000015647	Lama5	TRE+NRE	13.1418	10.7867	18.9868	7.98947	6.08555	10.1476	6.25086	11.0527	8.97352	15.0113	6.53746	4.77438	8.06388	4.93808
ENSMUSG00000015652	Steap1	TRE	0.512305	0.833232	0.449479	0.961926	0.0726793	0.546714	0.0100824	0.539226	0.810175	0.452324	0.934117	0.0542139	0.558105	0.0109931
ENSMUSG00000015653	Steap2	TRE+NRE	0.933617	0.383008	0.48273	0.29746	0.0534402	0.227068	0.0583802	2.26318	0.879695	1.08371	0.701322	0.0714446	0.407922	0.0547049
ENSMUSG00000015656	Hspa8	NRE	815.492	993.731	793.967	1125.6	1419.27	1124.68	1290.28	953.033	1174.65	890.588	1291.77	1591.38	1304.02	1448.94
ENSMUSG00000015659	Serac1	TRE+NRE	3.54106	2.15146	1.97161	2.74765	4.95663	3.26767	5.1195	3.20926	1.75191	1.5747	2.34035	3.67674	2.54274	3.86008
ENSMUSG00000015665	Awat1	not present	0.0234237	0.46622	0.222638	0.401648	0.113142	0.397738	0.149822	0.0154115	0.403864	0.189038	0.344634	0.0959846	0.334768	0.117111
ENSMUSG00000015668	Pdzd11	NRE	23.675	25.0369	16.8469	29.9996	32.4453	30.3007	32.382	19.5965	20.6365	13.3783	24.2861	24.8488	23.7842	25.5099
ENSMUSG00000015671	Psma2	NRE	73.8555	51.7053	39.8621	51.4665	48.1201	44.5939	49.2889	58.046	40.0824	29.5587	39.5897	34.7502	33.3317	35.3786
ENSMUSG00000015672	Mrpl32	NRE	20.8864	24.2561	14.7147	25.2719	18.9417	18.8696	18.9813	17.3359	19.6068	11.5962	20.5738	14.6623	14.7327	14.4557
ENSMUSG00000015697	Setdb1	TRE+NRE	16.6591	13.5487	13.852	12.0498	12.2629	10.4667	10.6063	14.6984	11.8911	11.5551	10.4834	10.1675	8.84072	8.83984
ENSMUSG00000015702	Anxa9	TRE	0.664896	4.11009	6.75898	4.49387	2.22766	5.26673	3.50715	0.571118	3.98049	6.55025	4.33912	2.04438	5.53027	3.29433
ENSMUSG00000015709	Arnt2	TRE	2.7988	17.4823	13.992	20.9487	29.3268	24.0191	32.8325	2.66091	16.17	12.5268	19.3471	25.6691	21.5281	29.006
ENSMUSG00000015711	Prune	NRE	9.59142	7.0306	8.64576	6.7773	7.09161	7.11393	7.40379	8.96021	6.53514	7.62795	6.2384	6.29581	6.43474	6.57094
ENSMUSG00000015714	Lass2	NRE	19.792	18.2703	24.9451	19.3734	17.6829	18.2234	17.2198	20.8843	18.9138	23.8446	20.9016	19.119	19.184	18.2241
ENSMUSG00000015721	Nlrp5	TRE	0.0210972	0.484326	0.0459329	1.8184	0.0297772	1.06109	0.0308436	0.0132759	0.393916	0.0261565	1.43768	0.0203305	0.775317	0.0161032
ENSMUSG00000015733	Capza2	NRE	58.026	60.4641	46.7272	61.3715	46.6725	47.863	48.2413	50.0799	51.915	38.6416	52.5266	37.7162	39.703	39.4349
ENSMUSG00000015745	Plekho1	NRE	2.8595	3.30218	10.7976	1.99911	2.16076	1.36888	1.3219	4.84357	5.66454	18.0592	3.41306	3.51033	2.23035	2.00378
ENSMUSG00000015747	Vps45	NRE	11.1082	8.73022	7.13441	8.04099	7.05364	7.32449	7.32871	8.98511	7.0174	5.57625	6.60949	5.44495	5.77206	5.60624
ENSMUSG00000015748	Prpf3	NRE	8.39166	7.68408	7.71546	7.20996	6.45882	6.12043	6.32248	12.1139	10.1688	10.5097	9.03639	8.17785	7.94836	7.4007
ENSMUSG00000015749	Anp32e	NRE	54.4499	36.3984	25.9155	31.3249	27.1904	22.5509	22.6273	135.362	86.1853	51.4523	67.8095	66.8269	57.7363	54.0886
ENSMUSG00000015750	Aph1a	NRE	41.0844	20.368	24.0784	17.8981	16.2646	16.5987	16.3663	55.3903	28.0531	32.1026	24.9009	20.9434	21.8623	21.6746
ENSMUSG00000015755	Tab2	NRE	21.0693	17.6284	18.0511	15.5289	15.1023	15.2958	15.8097	26.4284	22.1187	21.6229	19.635	18.0563	18.582	19.2615
ENSMUSG00000015757	Ppil4	NRE	15.7307	11.6093	12.9689	10.4028	9.57668	8.39093	9.32566	14.2916	10.328	11.2399	9.25756	8.14394	7.32745	8.04479
ENSMUSG00000015759	Cnih	NRE	31.8179	24.3864	24.972	22.6413	18.8969	17.8954	17.4205	29.8927	22.9988	21.7972	20.796	16.6372	15.8803	15.2836
ENSMUSG00000015766	Eps8	NRE	16.1315	4.85798	6.50971	7.57642	7.85816	11.4873	9.85013	21.5735	6.76642	9.137	10.2725	10.949	15.6432	13.3024
ENSMUSG00000015776	Med22	NRE	15.5708	11.5908	14.4537	10.9348	12.5129	12.4659	13.4955	19.3746	15.4164	17.1671	14.1346	16.0808	15.3793	17.6718
ENSMUSG00000015787	Abo	TRE	0.0056526	0.592051	0.805902	1.37976	0.171267	1.34171	0.289239	0.00662718	0.572053	0.776906	1.39264	0.15428	1.29435	0.263137
ENSMUSG00000015790	Surf1	NRE	23.686	19.9161	23.2075	22.5004	25.9614	26.103	29.3293	18.5231	14.9537	16.8463	17.1704	18.8737	19.3655	21.7255
ENSMUSG00000015804	Med28	NRE	8.37733	8.93992	9.50321	9.79419	8.81672	9.38096	9.71358	37.8976	40.1292	41.8092	46.4558	40.9242	42.9698	45.7363
ENSMUSG00000015806	Qdpr	NRE	28.0296	22.3889	18.0078	23.5463	19.8645	21.436	19.9834	35.2168	27.3899	21.5793	28.887	24.5962	25.6963	25.1043
ENSMUSG00000015812	Gnrh1	not present	0.624932	1.65167	0.675915	1.84899	0.603714	1.71589	0.532956	0.429814	1.36981	0.541001	1.34364	0.49607	1.42872	0.469424
ENSMUSG00000015829	Tnr	not present	0.0065789	0.674044	0.146625	0.791873	0.0866663	0.530031	0.08977	0.00541676	0.570209	0.126735	0.668778	0.0689813	0.446546	0.0820733
ENSMUSG00000015837	Sqstm1	TRE+NRE	133.594	72.3809	64.3904	80.7715	115.361	109.529	132.235	194.75	103.42	90.3699	120.238	150.887	142.549	176.025
ENSMUSG00000015839	Nfe2l2	TRE+NRE	42.0482	22.1317	30.2374	18.059	18.7912	19.7664	19.9417	41.3448	21.5324	27.8456	17.3759	16.9096	18.3022	18.08
ENSMUSG00000015843	Rxrg	TRE	1.1306	1.85088	0.154987	2.1028	1.5677	2.42547	1.5015	1.22309	2.11808	0.159891	2.45391	1.70538	2.64519	1.7302
ENSMUSG00000015846	Rxra	TRE+NRE	21.9721	12.2562	14.3094	10.0677	12.6879	14.7581	13.5056	22.6946	12.6212	14.2873	10.6757	13.3733	15.6275	14.3417
ENSMUSG00000015850	Adamtsl4	NRE	0.868025	2.02719	2.55257	1.70513	1.18407	1.91935	1.18238	0.885169	1.8904	2.2213	1.93641	1.03853	2.04225	1.05038
ENSMUSG00000015852	Fcrls	TRE	0.0511495	1.13793	0.955567	1.79165	0.814699	1.72361	1.33838	0.0551587	1.20865	0.939471	2.06346	0.810945	1.90168	1.38424
ENSMUSG00000015854	Cd5l	TRE	0.0426234	3.6977	0.0523871	3.75644	0.0140374	2.87576	0.00681566	0.038397	3.54322	0.0466599	3.5313	0.0119763	2.62593	0.00670246
ENSMUSG00000015869	Prpsap1	NRE	28.7586	29.0342	33.6597	33.5815	44.2409	40.1086	45.6133	28.1254	29.9979	31.1472	33.8634	42.8756	39.48	45.5647
ENSMUSG00000015879	Fam184b	TRE	0.49236	0.18299	0.491882	0.188556	0.0589641	0.0799032	0.047154	0.446857	0.179987	0.42729	0.165183	0.0556734	0.0676248	0.0428036
ENSMUSG00000015880	Ncapg	NRE	6.61363	9.62684	2.99823	10.2675	6.0776	5.23096	5.20349	5.38475	7.96853	2.33197	8.23034	4.74812	4.0994	4.0403
ENSMUSG00000015882	Lcorl	NRE	1.84497	2.1047	1.69662	2.5	1.73159	1.80527	1.85697	3.20279	3.56745	3.47792	4.50523	3.65912	3.80217	4.11891
ENSMUSG00000015889	Lta4h	NRE	36.3675	26.9912	26.7711	29.6615	22.6704	26.2245	23.4931	28.3016	20.5769	19.561	22.4619	16.502	19.6592	17.3303
ENSMUSG00000015890	Amdhd1	TRE	0.0582771	5.43253	0.515711	7.06731	8.00777	7.81278	9.52519	0.051341	4.79335	0.451872	6.19045	6.57157	6.59729	7.94794
ENSMUSG00000015932	Dstn	NRE	230.608	324.367	339.368	321.865	195.303	309.584	209.262	224.54	314.395	313.489	308.853	177.703	288.726	193.183
ENSMUSG00000015937	H2afy	NRE	41.8579	50.3652	70.2995	48.0495	44.4634	41.327	40.6175	39.6373	47.3851	63.1711	45.0055	39.7799	37.301	36.6006
ENSMUSG00000015942	Gtf2ird2	NRE	3.93849	6.05958	4.55602	7.68315	16.1506	9.458	17.2723	3.59737	7.83452	3.91735	10.5629	21.2791	11.857	23.3244
ENSMUSG00000015943	Bola1	NRE	10.9332	7.11848	7.1602	6.94044	7.46565	7.6698	6.87759	14.7043	9.08813	8.80707	9.0516	9.62157	10.266	9.21915
ENSMUSG00000015944	Gatsl2	NRE	1.05831	4.35096	3.14289	5.59042	8.51432	7.48686	9.55596	1.03267	4.2444	2.93246	5.40136	7.94454	7.10369	8.98262
ENSMUSG00000015947	Fcgr1	TRE	0.0124509	0.195005	0.0214241	0.151899	0.00546732	0.0371105	0.0265459	0.0133112	0.172971	0.0179314	0.20704	0.00621457	0.0361159	0.0264483
ENSMUSG00000015950	Ncf1	TRE+NRE	1.15114	139.33	9.47361	161.604	341.407	218.11	389.83	0.808912	126.3	8.00798	145.868	293.499	189.206	336.584
ENSMUSG00000015957	Wnt11	not detected	0.0388354	3.55586	0.970293	4.51675	3.35159	6.09784	4.75649	0.0784379	7.64644	1.86953	8.88013	6.843	12.5281	9.93657
ENSMUSG00000015961	Adss	NRE	79.6447	37.4226	37.7981	38.9323	35.9155	30.7805	35.9588	66.6591	30.943	30.0278	31.707	28.3748	24.8104	28.9656
ENSMUSG00000015962	1700016C15Rik	TRE	0.028263	1.90895	1.30612	3.99105	0.930798	3.32363	0.976183	0.0278933	1.62381	0.957137	3.23747	0.621428	2.74059	0.743735
ENSMUSG00000015966	Il17rb	TRE	1.38225	4.35752	20.3607	5.67223	4.99877	8.33941	6.5518	1.19212	3.74987	16.9186	4.87718	3.9544	6.86179	5.38988
ENSMUSG00000015968	Cacna1d	TRE	0.213646	2.40673	2.97064	2.91737	3.33068	2.96872	3.03307	0.106803	1.93658	1.60149	2.30374	2.66468	2.13307	2.34208
ENSMUSG00000015970	Chdh	NRE	1.63343	5.79417	19.6304	7.27573	6.53006	10.4862	7.82061	1.71997	5.95969	19.4689	7.3541	6.21192	10.3184	7.59205
ENSMUSG00000015971	Actr8	NRE	21.486	19.1988	17.0609	20.2473	24.4823	22.106	25.8753	18.2728	16.0866	13.5728	17.003	19.6726	18.1259	20.6833
ENSMUSG00000015980	Lrrc27	TRE	1.06179	1.02451	0.645048	1.01551	0.274751	0.72542	0.317739	1.63185	1.3083	0.838224	1.31037	0.463381	0.838645	0.458643
ENSMUSG00000015981	Stk32c	not detected	0.0518605	0.821469	0.0834416	0.889255	0.0683178	0.669391	0.0784037	0.0426374	0.72916	0.0666582	0.85068	0.0724904	0.592781	0.0728317
ENSMUSG00000015994	Fnta	NRE	52.0816	24.8132	31.6778	22.9335	22.9485	22.1763	23.2923	45.9645	21.7897	26.486	20.178	19.3916	18.9215	19.7922
ENSMUSG00000016018	Skiv2l2	NRE	38.9579	24.8882	22.6228	24.1367	19.9917	18.4708	19.7407	30.7732	19.5329	16.6791	18.5848	15.0876	13.8694	14.6836
ENSMUSG00000016024	Lbp	NRE	0.150038	4.03089	11.7054	2.9746	1.19721	2.78622	0.914637	0.18933	6.08105	17.072	4.92892	1.86989	4.23421	1.36732
ENSMUSG00000016028	Celsr1	NRE	17.0413	32.1103	28.7386	33.1226	59.2077	44.6158	57.3209	15.9065	29.7056	25.3286	30.3034	51.4741	39.5722	50.3282
ENSMUSG00000016087	Fli1	NRE	0.901943	0.271859	0.12	0.277077	0.127652	0.115434	0.0826398	0.862628	0.250714	0.104385	0.253455	0.106461	0.0935803	0.0525025
ENSMUSG00000016128	Stard13	NRE	0.621815	0.937547	0.826763	0.814416	0.286088	0.581405	0.239821	0.705735	1.15505	0.838975	0.969581	0.265686	0.669998	0.228892
ENSMUSG00000016150	Odz1	TRE	0.107341	1.63137	0.212134	1.11363	1.13497	0.907409	1.07716	0.0992088	1.57569	0.189275	1.06494	1.08328	0.834989	1.0571
ENSMUSG00000016179	Camk1g	TRE	0.151337	1.01581	0.174311	0.963848	0.0341762	0.67953	0.0110625	0.150962	1.0944	0.126113	0.889811	0.0213149	0.634347	0.0137414
ENSMUSG00000016181	Diexf	NRE	3.64105	2.34356	3.24698	2.22236	2.05873	1.80507	1.66431	3.34078	2.07589	2.75841	1.94682	1.71293	1.53862	1.41821
ENSMUSG00000016194	Hsd11b1	NRE	0.22243	3.36993	0.744781	4.38603	2.99879	5.85177	4.67824	0.371538	6.05693	1.24086	8.22734	5.6598	11.1738	8.97526
ENSMUSG00000016200	Syt14	not present	0.654679	1.20159	0.477238	1.41177	0.959084	1.56594	1.22013	0.656448	1.17676	0.44142	1.32412	0.920384	1.3671	1.11306
ENSMUSG00000016206	H2-M3	TRE	17.7075	40.6627	42.3535	49.4087	66.6575	57.4657	70.6387	14.4884	32.7822	31.8195	39.24	50.3096	43.6416	53.4908
ENSMUSG00000016239	Lonrf3	TRE	0.166316	3.16598	0.535825	4.70427	2.22357	3.4211	2.33127	0.154595	3.15402	0.54064	4.99065	2.22426	3.53939	2.39054
ENSMUSG00000016252	Atp5e	NRE	231.393	321.26	220.979	335.037	325.3	326.623	318.562	193.909	261.515	179.227	278.372	260.55	261.338	251.905
ENSMUSG00000016253	Th1l	NRE	17.1633	18.3005	19.1528	17.5658	20.6622	16.9923	18.7967	14.5239	14.9347	15.2092	14.04	16.144	13.5757	14.8657
ENSMUSG00000016255	Tubb1	not present	0.0463143	2.89394	0.166976	2.61215	2.4608	3.06622	2.58053	0.0335426	2.71943	0.126596	2.36815	2.0817	2.7291	2.22126
ENSMUSG00000016256	Ctsz	NRE	6.64284	233.456	55.415	264.016	284.036	280.31	327.394	5.9919	208.658	47.9745	237.177	245.85	244.715	283.758
ENSMUSG00000016257	Slmo2	NRE	23.6557	46.4947	25.4725	49.4644	45.1517	46.0661	44.722	28.9186	58.1832	30.877	60.9187	56.9741	60.2364	55.936
ENSMUSG00000016262	Sertad4	NRE	0.316988	2.6489	7.65301	1.87903	0.94785	1.9432	0.862873	0.317068	2.64886	7.24359	1.84904	0.899515	1.86237	0.818062
ENSMUSG00000016283	H2-M2	not present	20.3535	94.1898	106.644	158.52	157.844	179.356	179.163	21.0333	102.007	111.572	175.855	174.169	201.472	198.861
ENSMUSG00000016308	Ube2a	NRE	15.4045	12.9568	13.1047	14.339	10.0045	10.1704	10.776	13.7042	11.4497	11.0512	12.4517	8.42267	8.69685	9.02062
ENSMUSG00000016319	Slc25a5	NRE	174.282	211.51	214.316	193.874	140.653	169.609	126.967	165.119	199.083	191.928	180.907	123.912	151.786	113.625
ENSMUSG00000016327	Atp1b4	TRE	0.00553592	0.30852	0.0033869	0.18273	0.00340325	0.117601	0.00991442	0.00255596	0.302033	0.00253947	0.170242	0.00291064	0.116549	0.00974525
ENSMUSG00000016344	Ppdpf	NRE	29.8785	36.2626	29.162	38.767	43.9449	42.6151	50.0643	38.0801	46.9556	36.3225	50.7549	52.5717	51.6613	59.9666
ENSMUSG00000016346	Kcnq2	TRE+NRE	0.00635045	1.00417	0.0536728	1.40314	0.99729	1.26299	1.0405	0.00701318	1.94279	0.0980184	2.85459	1.92693	2.43405	2.08252
ENSMUSG00000016349	Eef1a2	NRE	0.0885321	5.48773	0.706638	6.27449	7.27544	7.30101	8.06761	0.050444	5.61017	0.699456	6.37411	7.09772	7.37105	7.81591
ENSMUSG00000016356	Col20a1	TRE	1.56486	3.56575	1.73226	4.8946	1.18772	4.24015	1.22628	1.18913	2.74119	1.25093	3.65262	0.829938	3.08447	0.839908
ENSMUSG00000016382	Pls3	NRE	27.3952	22.9005	28.8162	22.5429	16.6948	21.0523	17.6754	28.7778	23.7016	28.6397	23.2361	16.8168	21.9098	18.1894
ENSMUSG00000016386	Mpped2	TRE+NRE	10.1753	2.95006	4.66407	0.748258	0.422851	0.475464	0.264621	14.6484	4.3363	6.31276	0.985064	0.694866	0.844112	0.314693
ENSMUSG00000016409	Nkap	NRE	10.6699	8.24449	6.32356	8.08951	8.53084	7.08608	8.37846	9.99581	7.69807	5.68168	7.55652	7.61394	6.38466	7.45242
ENSMUSG00000016427	Ndufa1	NRE	88.2745	119.929	89.1139	117.777	123.487	130.318	131.91	73.5301	96.5599	69.3076	94.1239	95.2021	103.334	101.327
ENSMUSG00000016458	Wt1	TRE	0.0161311	0.454761	0.0380663	0.374224	0	0.206305	0	0.0189864	0.61631	0.0442806	0.503846	0	0.279798	0
ENSMUSG00000016477	E2f3	NRE	5.86116	4.04871	3.78413	2.78125	2.31425	1.96784	1.85634	6.27582	4.62896	3.93126	3.25458	3.05416	2.21171	1.96557
ENSMUSG00000016481	Cr1l	NRE	19.3036	29.1484	30.5166	34.0614	26.6002	29.1442	28.3063	17.1385	25.9083	25.6604	29.4082	22.4345	25.3146	24.0953
ENSMUSG00000016487	Ppfibp1	TRE+NRE	8.41107	15.0692	17.1015	14.75	18.6145	16.1646	20.0291	8.61619	15.3394	16.0165	14.3433	17.0901	15.3034	18.3834
ENSMUSG00000016493	Cd46	TRE	1.27412	0.730345	1.37694	1.01306	1.02824	0.864644	0.807607	1.18656	0.626905	1.18364	0.946835	0.801426	0.779753	0.745408
ENSMUSG00000016494	Cd34	NRE	12.0103	6.89265	2.47951	6.16884	0.392746	3.90002	0.39198	11.7706	6.46392	2.20071	5.8862	0.36037	3.56978	0.370162
ENSMUSG00000016495	5033414D02Rik	NRE	130.704	28.0413	32.7209	31.3356	21.4456	30.336	22.9547	255.737	54.685	63.3305	59.8537	40.9349	58.7335	43.4895
ENSMUSG00000016496	Cd274	NRE	185.907	39.7649	32.0328	45.7362	47.9612	51.2738	52.8225	177.353	38.05	28.9895	43.4013	43.3052	47.1966	48.0056
ENSMUSG00000016498	Pdcd1lg2	TRE	1.3525	19.5102	12.7666	23.5574	29.0895	27.0082	32.679	1.25777	17.7808	11.0208	21.4514	25.0166	23.4254	28.3243
ENSMUSG00000016503	Gtf3a	NRE	29.0402	27.9643	31.1281	29.6533	29.7614	25.6291	28.1511	25.8105	24.5348	25.6881	25.8148	24.5545	21.0784	23.4709
ENSMUSG00000016510	Mtif3	NRE	7.09864	6.54364	7.50175	7.15542	7.37402	6.60384	7.24638	8.90403	6.84107	7.87585	7.86978	8.43644	7.74879	8.68438
ENSMUSG00000016520	Lnx2	NRE	3.9987	7.59563	5.42513	7.53852	9.46719	9.19892	10.188	3.75384	7.08198	4.71946	7.04876	8.26497	8.1881	9.066
ENSMUSG00000016524	Il19	not present	0.0616647	1.69014	0.218276	2.20181	0.19496	1.05599	0.268204	0.0243432	1.43482	0.15555	1.69814	0.136889	0.859044	0.216011
ENSMUSG00000016526	Dyrk3	TRE	1.22568	2.68669	1.51417	1.77517	1.25582	1.64067	1.17929	1.23179	2.71741	1.4577	1.77618	1.21609	1.59419	1.11427
ENSMUSG00000016528	Mapkapk2	NRE	62.8686	37.7468	42.0219	31.0239	30.7792	30.2971	31.5285	54.5399	32.2604	34.6416	26.4652	25.1378	25.2414	25.8689
ENSMUSG00000016529	Il10	TRE	0.0497084	3.0898	13.0255	5.7492	5.38049	6.47408	7.63062	0.0507058	2.83512	10.897	5.07863	4.5581	5.51226	6.54031
ENSMUSG00000016534	Lamp2	NRE	292.307	71.67	67.1195	67.039	76.5536	59.742	79.125	519.919	117.658	100.434	110.143	127.834	101.442	134.87
ENSMUSG00000016541	Atxn10	NRE	94.0607	59.0111	58.905	56.1828	55.3946	50.43	53.277	103.295	64.0048	61.0096	60.3605	56.2139	52.4255	54.5791
ENSMUSG00000016552	Foxred2	TRE	0.372787	0.927484	0.811635	1.04522	0.724937	1.07985	0.811834	0.370649	0.923688	0.783504	1.03943	0.6738	1.02665	0.771176
ENSMUSG00000016554	Eif3d	NRE	96.6089	74.8703	67.1566	70.6154	83.8958	71.6928	77.83	78.3291	60.0346	51.7217	56.3507	64.3456	55.7797	60.34
ENSMUSG00000016559	H3f3b	TRE+NRE	359.688	522.422	498.339	459.869	414.048	395.137	413.694	345.427	499.766	452.295	430.905	365.092	356.102	359.359
ENSMUSG00000016619	Nup50	NRE	23.4871	21.0511	13.1625	19.7943	23.0502	21.295	24.6066	29.939	28.9419	17.0046	26.318	30.5991	28.2144	32.5611
ENSMUSG00000016624	Phf21b	TRE	0.10853	1.85649	1.88881	2.33442	3.55639	3.076	3.70863	0.111342	1.94659	1.87181	2.47242	3.59247	3.10137	3.81418
ENSMUSG00000016626	Nlrp14	TRE	0	0.639303	0.0157393	0.529583	0	0.176964	0	0	0.636601	0.0168115	0.524785	0	0.159975	0
ENSMUSG00000016637	Ift27	NRE	18.049	14.2349	16.2811	13.6079	13.5059	12.809	12.4704	14.2311	11.0022	12.1772	10.6074	9.98581	9.60377	9.47467
ENSMUSG00000016664	Pacsin2	NRE	57.473	72.6508	26.9585	75.6463	155.907	92.6265	155.475	64.7351	81.0402	28.5183	83.7139	161.708	98.2447	162.159
ENSMUSG00000016756	Cmah	TRE	5.52105	11.3567	6.58865	11.0069	12.0601	8.43823	11.31	5.65522	11.3646	5.96663	10.6633	10.7307	7.57462	10.1803
ENSMUSG00000016757	Ttll12	NRE	14.419	14.1935	12.7591	13.2076	12.5121	11.6643	11.4948	12.9162	12.4433	10.7187	11.5487	10.6244	9.98473	9.66156
ENSMUSG00000016758	Bik	NRE	0.149617	12.6741	13.0929	15.2537	24.0457	21.505	26.4419	0.111382	10.9915	10.5643	12.909	19.0196	17.5292	21.3172
ENSMUSG00000016763	Scube1	TRE	0.0729046	1.85493	0.255362	2.28307	0.414098	1.71947	0.398729	0.0605324	2.17978	0.274286	2.80442	0.445934	2.07147	0.454276
ENSMUSG00000016831	Tox4	NRE	21.88	17.2953	13.4126	17.1282	19.7276	18.2354	20.7444	19.9702	15.7097	11.3725	15.5709	16.9838	16.0431	17.9933
ENSMUSG00000016833	Mrps18c	NRE	26.1325	23.9075	20.8922	21.9179	19.5526	21.139	18.8484	33.1832	28.5131	23.4454	25.2353	20.1498	21.8999	19.6844
ENSMUSG00000016918	Sulf1	TRE	66.9091	20.8578	44.2501	6.51198	9.74597	4.37365	7.469	58.7859	18.3008	37.2006	5.72983	8.16969	3.71867	6.20282
ENSMUSG00000016921	Srsf6	NRE	66.5919	45.1666	54.7148	41.6087	33.5638	29.4322	29.4163	62.3801	42.3748	48.202	38.3967	29.5705	26.2146	26.0766
ENSMUSG00000016933	Plcg1	NRE	21.3118	10.1311	22.3502	7.52784	7.02469	8.85813	6.54797	25.3584	11.5156	24.7047	8.44285	7.47278	9.498	6.99699
ENSMUSG00000016940	Kctd2	NRE	6.90239	4.07779	8.30785	4.36974	5.108	4.78789	5.41212	9.2157	5.54112	10.5869	5.7274	6.51957	6.25522	7.06502
ENSMUSG00000016942	Tmprss6	TRE	0.0306101	3.73545	0.30432	3.68784	0.259865	3.66784	0.304558	0.0245111	3.26193	0.256931	3.27895	0.211444	3.1493	0.26371
ENSMUSG00000016946	Kctd5	NRE	11.2972	14.7223	16.7517	12.2867	11.488	11.4596	10.1782	10.6338	13.8054	15.0019	11.3014	10.0882	10.411	9.00327
ENSMUSG00000016982	Pom121l2	TRE	0.405375	0.0751536	0.0664312	0.0681469	0.056638	0.0332849	0.0274998	0.672513	0.113903	0.0991825	0.098244	0.0584688	0.0425918	0.0358963
ENSMUSG00000016984	Etaa1	NRE	4.17782	3.15031	3.44234	2.88778	2.44263	2.09399	2.13643	4.07518	3.07417	3.23615	2.77721	2.19921	1.98668	1.98952
ENSMUSG00000016995	Matn4	TRE	0.174161	1.24721	3.39786	1.31751	0.102639	0.879237	0.205204	0.188975	1.35591	3.35594	1.35675	0.107415	0.954017	0.238974
ENSMUSG00000016998	Svs4	TRE	0.0296935	6.49631	0.116785	7.4876	0.0391164	4.40907	0	0.0322578	5.70183	0.0994126	6.61322	0.0219031	3.54887	0
ENSMUSG00000017000	Svs6	not detected	0	0.675152	0.0199463	0.675228	0	0.263841	0	0	0.650684	0.0192102	0.586736	0	0.23918	0
ENSMUSG00000017002	Slpi	NRE	0.174752	31.1239	1.40173	36.4911	1.07834	27.2441	1.96487	0.316432	55.8872	2.38369	62.5052	1.92588	47.8351	3.54066
ENSMUSG00000017003	Svs3a	not detected	0	0.473641	0	0.497171	0	0.318578	0	0	0.266153	0	0.242529	0	0.126967	0
ENSMUSG00000017004	Svs5	TRE	0.0336006	1.4143	0.016519	1.86402	0	0.946858	0	0.0570756	1.3943	0.0280042	1.97439	0	0.924012	0
ENSMUSG00000017007	Rbpjl	TRE	0.264517	0.38568	0.874264	0.447837	0.455542	0.554499	0.524467	0.0231363	0.0617191	0.411231	0.08192	0.0229715	0.0871463	0.0525282
ENSMUSG00000017009	Sdc4	NRE	67.0471	40.3965	86.7041	38.4729	26.1145	42.5707	33.3395	65.1254	38.6863	79.5214	36.7948	23.6301	39.1519	30.4941
ENSMUSG00000017049	Ccdc70	TRE	0	0.038112	0	0.0785426	0	0.0421987	0	0	0.0437827	0	0.084531	0	0.0485561	0
ENSMUSG00000017057	Il13ra1	NRE	33.2703	34.1961	50.1061	29.4962	27.0817	24.3807	28.421	31.1912	31.7252	44.5492	27.0141	23.1468	21.485	24.776
ENSMUSG00000017064	Prl5a1	TRE	0.010229	0.380491	0	0.588098	0	0.554331	0.0392559	0.0111124	0.331911	0	0.533833	0	0.438778	0.0382323
ENSMUSG00000017119	Nbr1	NRE	26.1067	29.553	32.9768	29.4471	29.1249	32.8565	30.5501	30.294	32.9368	36.0937	33.3978	31.1833	34.5291	32.8616
ENSMUSG00000017132	Cyth1	TRE+NRE	48.7493	28.7302	14.1727	29.5519	44.261	35.7283	47.5196	53.5223	34.0908	14.9587	34.7376	50.1125	41.3282	53.2852
ENSMUSG00000017144	Rnd3	NRE	19.7989	9.26685	5.93052	6.9887	3.00516	7.8554	3.61957	30.2883	14.217	8.62698	10.516	4.35666	11.4778	5.25093
ENSMUSG00000017146	Brca1	TRE+NRE	3.53564	5.68689	2.72465	5.05868	4.51406	3.48126	3.35891	3.25584	5.15488	2.35387	4.564	3.86758	3.04859	2.89917
ENSMUSG00000017165	Gast	TRE	0.0235935	12.0094	0.255182	13.993	0.341886	5.67687	0.271634	0.0232848	9.90642	0.182697	11.6573	0.228717	4.62663	0.236014
ENSMUSG00000017167	Cntnap1	not detected	1.58952	15.1442	3.58511	26.9006	32.2279	26.9003	31.9419	1.37811	13.0768	2.96519	23.1717	26.831	22.6064	26.5412
ENSMUSG00000017176	Nt5c3l	NRE	12.0028	7.46141	10.132	7.07712	7.11513	5.96136	6.0486	19.0713	13.6526	15.4681	12.7178	13.0125	11.8254	10.9923
ENSMUSG00000017188	Ccdc56	NRE	20.2238	22.3985	21.1016	27.812	28.9491	29.1948	30.8069	23.828	26.5642	24.0562	32.0761	33.9984	36.5982	37.5728
ENSMUSG00000017195	Zpbp2	TRE	0.0794606	0.1426	0.0585975	0.13358	0.0959534	0.100476	0.110119	0.081424	0.148966	0.0594778	0.148656	0.0860875	0.0983764	0.106104
ENSMUSG00000017204	Gsdma	TRE	0.179954	13.9318	6.14997	14.5542	4.17319	16.5075	5.34367	0.135632	10.0446	4.34992	10.0695	2.448	11.28	3.29253
ENSMUSG00000017210	Med24	NRE	14.5157	14.4194	15.5345	14.0498	14.2242	13.8992	13.691	14.087	13.9483	13.6201	12.9829	12.0344	12.0251	11.8763
ENSMUSG00000017211	Gsdma2	TRE	0.0752509	8.38706	0.587745	10.4454	0.841188	8.03898	1.03594	0.0603455	5.96238	0.102482	7.55793	0.156161	4.93558	0.154925
ENSMUSG00000017221	Psmd3	NRE	109.943	62.8139	59.4178	55.0845	58.1027	56.2605	56.8879	105.821	58.843	52.1421	50.5075	53.2742	51.6503	51.1517
ENSMUSG00000017264	Exosc10	NRE	29.0032	24.4453	24.9706	23.8824	24.4581	20.7938	22.2373	26.7243	22.1072	21.5566	21.4672	20.9419	18.1859	19.3358
ENSMUSG00000017286	Glod4	NRE	46.7706	28.9695	25.1268	30.4443	34.0398	27.9491	34.1738	73.5811	46.4341	37.8512	50.5476	58.2119	47.7228	54.7584
ENSMUSG00000017288	Vps53	NRE	30.5232	18.8353	19.5531	20.4031	21.7649	21.4237	21.8831	41.132	24.9422	24.1468	24.7085	29.539	26.7108	31.8582
ENSMUSG00000017291	Taok1	NRE	15.5853	10.9654	11.838	8.73267	7.48175	6.90517	7.25862	15.8338	10.9806	11.3115	8.67478	6.91237	6.64008	6.82824
ENSMUSG00000017299	Dnttip1	NRE	17.6624	14.8989	15.634	13.9484	14.324	13.5147	13.7827	17.038	15.4339	14.875	13.2945	14.8331	13.9292	13.0952
ENSMUSG00000017300	Tnnc2	NRE	0.155043	1.60115	3.81879	1.69677	0.449336	1.12588	0.218169	0.0479376	1.17092	2.94057	1.22865	0.229862	0.798761	0.117326
ENSMUSG00000017307	Acot8	NRE	11.7904	9.05137	10.5462	9.47874	10.7228	11.9365	10.8766	9.55095	7.69194	8.08986	7.84551	8.45947	9.81104	8.92178
ENSMUSG00000017309	Cd300lg	TRE	0.242371	0.710727	0.184833	0.74821	0.147056	0.400145	0.0873504	0.255977	0.728538	0.150282	0.832456	0.101092	0.447354	0.063379
ENSMUSG00000017310	Spint4	TRE	0	0.25463	0	0.481021	0	0.203619	0	0	0.216804	0	0.342681	0	0.170484	0
ENSMUSG00000017311	Pyy	TRE	0.503579	70.159	3.00503	87.5225	2.56203	58.3534	3.35425	0.521369	66.2983	2.72253	84.376	2.23159	53.5187	3.10929
ENSMUSG00000017314	Mpp2	TRE	7.90261	1.49658	0.618405	1.61689	0.148191	0.950453	0.11774	7.64726	1.42758	0.54894	1.56371	0.12138	0.875934	0.117507
ENSMUSG00000017316	Ppy	TRE	0.21706	32.9973	0.704303	42.5943	0	30.7717	0	0.237666	26.2139	0.538059	33.5358	0	23.8034	0
ENSMUSG00000017344	Vtn	TRE	0.0684535	1.54117	0.599646	1.01058	0.00819785	0.9038	0.0796072	0.0669857	1.3923	0.500189	0.909539	0.00918071	0.740206	0.046745
ENSMUSG00000017376	Nlk	NRE	5.17143	9.73387	11.9645	10.903	13.383	12.3472	15.0928	6.0919	12.0221	11.7483	12.5642	14.3253	12.6119	15.0498
ENSMUSG00000017386	Traf4	NRE	15.5953	17.3568	14.7282	13.9549	20.9984	18.7029	21.647	14.3408	15.838	12.7223	12.6693	18.2313	16.3674	18.7586
ENSMUSG00000017390	Aldoc	TRE+NRE	0.229751	4.41405	1.82874	3.25905	1.56374	3.18447	2.07444	0.34271	6.67479	2.53744	4.89619	2.1136	4.34974	2.90968
ENSMUSG00000017400	Stac2	TRE	0.00345747	1.34023	0.0611923	1.67394	0.132085	1.31532	0.229991	0.00386565	1.22758	0.0614897	1.59954	0.167234	1.19331	0.223859
ENSMUSG00000017404	Rpl19	NRE	716.716	783.365	646.023	764.947	812.211	673.365	762.078	643.294	694.007	552.01	678.123	685.768	576.819	640.652
ENSMUSG00000017405	Nek8	NRE	3.83081	9.64795	3.93192	10.3584	16.2719	13.1574	16.4264	3.55716	9.71224	3.24201	10.1659	14.4864	12.2378	14.802
ENSMUSG00000017412	Cacnb4	TRE	0.281388	0.225622	0.729378	0.222044	0.070122	0.194439	0.10008	0.296417	0.23885	0.739232	0.234688	0.0666325	0.193584	0.101827
ENSMUSG00000017417	Plxdc1	TRE	2.27468	1.21312	2.05473	1.90357	1.0397	1.47176	0.949374	2.4298	1.22162	1.97119	1.86394	0.896203	1.37668	0.871962
ENSMUSG00000017418	Arl5b	TRE+NRE	9.31539	6.66842	5.00072	5.51123	5.44139	4.82963	5.54543	9.73527	6.9451	4.96188	5.62837	5.26639	4.79884	5.42221
ENSMUSG00000017421	Zfp207	TRE+NRE	50.014	41.1533	38.8482	37.3433	36.0961	33.1292	35.3234	80.587	64.3139	58.3611	57.8372	54.9593	51.8573	53.2466
ENSMUSG00000017428	Psmd11	NRE	70.0747	38.2636	34.297	33.8611	31.3793	29.3784	30.1523	128.806	67.9693	53.9017	60.2189	51.8763	48.8895	49.2196
ENSMUSG00000017446	C1qtnf1	TRE	1.77668	3.30288	4.69638	3.84696	1.14082	3.68479	1.2275	2.40869	4.54826	5.79599	5.01425	1.62209	5.19185	1.51234
ENSMUSG00000017453	Pipox	TRE	0.135798	1.99926	1.27649	4.25164	2.88374	6.02274	3.88432	0.105097	1.79497	1.02971	3.66669	2.35549	4.96457	3.23627
ENSMUSG00000017466	Timp2	NRE	12.0258	10.2747	17.9982	8.93508	3.1706	8.75575	3.68112	16.5667	18.9822	25.0555	15.7324	5.7019	16.6811	6.58582
ENSMUSG00000017478	Zc3h18	NRE	18.1574	20.5009	17.9518	18.147	23.5254	22.21	23.1152	17.4261	21.537	17.3224	18.8298	20.9998	21.9221	22.2524
ENSMUSG00000017485	Top2b	NRE	51.9947	28.1641	34.3168	21.9731	20.223	17.4656	18.8874	57.813	28.9922	35.552	23.0357	20.3936	17.9031	18.7413
ENSMUSG00000017491	Rarb	TRE	2.87062	0.635552	1.99944	0.787856	0.481923	0.510809	0.434254	2.99393	0.732229	2.10608	0.821666	0.49733	0.639366	0.461146
ENSMUSG00000017493	Igfbp4	TRE+NRE	4.45012	24.6632	72.8482	7.53524	10.4116	8.54931	10.7266	7.84951	50.5756	145.565	14.079	18.1676	14.7686	18.2598
ENSMUSG00000017499	Cdc6	TRE	2.82046	1.88575	1.31857	1.29312	1.26142	0.531212	0.702447	4.07862	2.72421	1.90375	1.93267	1.74666	0.748767	1.00171
ENSMUSG00000017548	Suz12	NRE	17.8716	15.9951	12.5869	15.5154	13.2672	10.9909	13.1438	16.2246	14.5456	10.8602	13.8238	11.2846	9.61567	11.2804
ENSMUSG00000017550	Atad5	TRE	2.918	2.86512	1.87462	2.18035	1.7805	1.3016	1.39121	2.75875	2.757	1.68571	1.98335	1.609	1.23699	1.34115
ENSMUSG00000017561	Crlf3	NRE	20.7665	10.1329	7.79217	9.24705	9.36301	8.16005	8.1544	21.7362	10.4629	7.89455	9.38489	9.37686	8.06111	7.98282
ENSMUSG00000017588	Krt27	not detected	0.0186718	1.85401	0.0952381	1.85862	0.188321	1.2117	0.318275	0.0076066	1.05584	0.0132613	1.00699	0.0103298	0.569852	0.0437025
ENSMUSG00000017607	Tns4	TRE+NRE	0.636709	2.7965	11.186	1.82643	1.19196	1.46583	0.972569	0.532041	2.55573	9.95969	1.65473	0.976128	1.2644	0.771265
ENSMUSG00000017615	Tnfaip1	NRE	24.6295	15.0505	16.7746	13.4701	13.2685	13.3558	13.0757	25.5039	15.2017	16.3652	13.5223	12.0438	12.4669	12.0418
ENSMUSG00000017631	Abr	NRE	9.23655	18.4793	21.9811	23.089	29.3817	30.8579	31.9922	16.16	33.8431	40.3658	40.9977	52.0178	56.4035	57.9267
ENSMUSG00000017639	Rab11fip4	TRE	78.034	20.7847	24.8323	19.8494	29.7341	21.3994	25.3462	76.146	20.1007	23.0941	19.0581	27.9368	19.7591	23.8837
ENSMUSG00000017652	Cd40	TRE	15.6193	69.0877	17.3273	81.5638	78.0521	73.4805	81.8044	28.6061	139.641	28.4973	162.695	157.823	148.001	167.667
ENSMUSG00000017664	Slc35c2	TRE+NRE	11.797	8.51269	9.28221	8.75902	8.59866	8.7937	8.42995	12.037	8.79152	8.8825	9.87832	9.15776	9.05201	9.49252
ENSMUSG00000017667	Zfp334	TRE	1.89671	0.515952	1.22678	0.246805	0.244417	0.243165	0.16946	1.88283	0.491267	1.13871	0.229612	0.201634	0.215353	0.139021
ENSMUSG00000017670	Elmo2	NRE	12.4075	7.40465	7.51604	8.04923	9.40662	7.65691	9.04325	21.8309	13.5829	13.5186	15.7051	14.9789	13.6081	13.6482
ENSMUSG00000017677	Wsb1	NRE	27.1281	22.8393	25.7817	19.0598	15.7233	15.8486	15.0105	24.8563	20.9873	22.3957	17.2597	13.6857	13.9088	13.0507
ENSMUSG00000017679	Ttpal	TRE	17.4959	8.54471	7.95428	8.71329	9.6248	8.51571	10.1191	20.4678	9.60867	9.13151	9.9068	10.8339	9.72172	11.5618
ENSMUSG00000017686	Rhot1	TRE+NRE	13.9264	13.4936	10.7133	14.0809	12.5729	12.404	12.5804	16.6568	16.062	12.1067	16.6041	13.931	14.0993	14.0196
ENSMUSG00000017688	Hnf4g	TRE	0.624285	5.79044	2.55017	10.5999	9.38728	12.4273	11.4972	0.688435	6.44384	2.6439	12.4954	11.071	15.2982	13.5652
ENSMUSG00000017692	Rhbdl3	TRE	37.6425	15.6506	22.699	10.5248	15.4462	12.317	14.3885	35.9102	14.8793	20.5511	9.87853	13.8394	11.2451	12.8286
ENSMUSG00000017697	Ada	TRE	36.5131	10.416	3.47069	11.4592	8.20725	10.8849	9.46676	29.7108	8.28406	2.64959	9.12319	6.25731	8.71911	7.31031
ENSMUSG00000017707	Serinc3	NRE	69.5911	101.776	57.0241	148.057	171.521	146.286	188.507	62.0593	89.2473	48.5728	129.586	139.533	122.299	153.997
ENSMUSG00000017713	Tha1	NRE	1.23246	3.17511	3.07477	3.82831	2.98057	4.45262	3.48264	1.06481	2.81405	2.69074	3.3604	2.4931	3.93744	2.93216
ENSMUSG00000017715	Pgs1	NRE	12.7484	16.3029	16.3125	15.8257	20.2795	18.7721	20.9925	11.5709	14.2558	13.9395	13.7331	16.9855	15.705	17.6375
ENSMUSG00000017716	Birc5	NRE	6.10784	5.61503	2.95042	6.19575	5.22538	3.46367	4.00795	19.2703	17.9815	8.10528	19.3496	13.9223	9.7382	10.041
ENSMUSG00000017718	Afmid	TRE	1.4785	2.67861	3.4398	2.61925	3.47071	2.58133	3.281	1.45257	2.86201	3.53305	2.69906	3.49675	2.68029	3.43658
ENSMUSG00000017720	Trp53tg5	TRE	0.151059	0.329858	0.251357	0.257849	0.260225	0.377823	0.193239	0.156016	0.289257	0.178399	0.202884	0.164883	0.28642	0.15981
ENSMUSG00000017721	Pigt	not detected	23.7546	30.485	31.4986	26.9519	28.6601	29.5294	28.6406	24.8653	31.4112	31.7555	28.1422	28.3022	29.661	28.0652
ENSMUSG00000017723	Wfdc2	NRE	17.8814	55.495	56.8225	58.9275	25.9362	58.9586	37.4386	26.3793	74.0318	73.5652	79.7493	32.7583	77.6691	49.0467
ENSMUSG00000017724	Etv4	not detected	6.96626	4.41105	1.85413	3.90895	0.792295	3.30586	1.01812	5.92106	3.80203	1.55407	3.34773	0.646373	2.73176	0.871241
ENSMUSG00000017733	Spinlw1	TRE	0	0.232138	0	0.393975	0	0.166313	0	0	0.197609	0	0.372616	0	0.149573	0
ENSMUSG00000017734	Dbndd2	TRE	11.34	2.36353	4.03546	2.26208	1.78238	2.66088	2.14452	43.4739	8.94662	14.3864	8.48387	6.37748	9.65874	7.94576
ENSMUSG00000017737	Mmp9	TRE	129.208	39.0136	90.8866	26.5795	22.2087	16.2767	8.56211	123.187	37.5383	83.6772	24.8777	20.6019	14.7509	7.77249
ENSMUSG00000017740	Slc12a5	TRE	2.36538	2.06929	1.23564	2.50371	1.32648	2.09246	1.19075	2.559	2.28499	1.35851	2.6916	1.44148	1.99041	1.13259
ENSMUSG00000017747	Ghdc	NRE	6.18541	6.70836	5.46532	7.81541	12.4152	11.4645	13.7213	5.5191	5.75933	4.59087	6.66238	10.4738	9.47961	11.8104
ENSMUSG00000017754	Pltp	NRE	726.324	41.1967	92.1629	18.2296	22.1211	14.2678	12.7217	877.698	47.6487	99.6864	20.9488	22.6238	15.015	12.7646
ENSMUSG00000017756	Slc12a7	NRE	11.639	11.1046	26.1347	10.0921	9.93874	10.5813	8.82704	12.1098	11.3978	25.3354	10.3812	9.80541	10.5777	8.63013
ENSMUSG00000017760	Ctsa	TRE+NRE	163.8	26.7115	49.983	23.5633	19.442	28.0599	20.8106	115.562	34.6804	60.0612	35.5335	26.3523	42.0701	30.3471
ENSMUSG00000017764	Zswim1	NRE	35.8449	3.23181	3.82185	3.33405	3.15142	3.756	3.44466	47.2446	3.82318	3.98489	4.048	3.59272	4.28532	4.0148
ENSMUSG00000017765	Slc12a4	NRE	24.795	8.65615	16.564	5.86686	10.554	5.47721	9.18889	23.0641	7.79692	13.7674	5.49338	8.64163	4.77652	7.73703
ENSMUSG00000017767	1700020C07Rik	TRE	21.3608	0.310872	0.434453	0.36211	0.127327	0.209517	0.0353269	19.087	0.248213	0.383827	0.296435	0.102817	0.192209	0.034573
ENSMUSG00000017774	Myo1c	NRE	39.3589	15.0194	19.7214	13.8003	14.0757	13.6131	12.5981	43.2063	16.3069	20.4141	14.7906	14.3109	14.146	12.8726
ENSMUSG00000017776	Crk	NRE	33.9981	18.4788	21.2402	15.9104	13.7828	14.13	13.5948	45.5449	25.2411	27.6698	21.4255	20.8347	21.7043	20.1233
ENSMUSG00000017778	Cox7c	NRE	45.8828	59.5819	43.1851	62.0065	62.628	66.1051	65.299	52.9005	64.8924	45.438	67.5589	68.8714	70.5056	74.7429
ENSMUSG00000017781	Pitpna	NRE	31.0555	21.5581	23.3542	22.911	17.9122	23.5571	18.5458	25.407	17.3258	18.4928	18.5417	13.7946	18.4182	14.3238
ENSMUSG00000017801	Mlx	NRE	14.8765	12.7987	13.7095	14.6059	13.7577	14.8752	14.5644	15.9895	12.9518	13.2893	14.6921	13.2599	15.1047	14.4612
ENSMUSG00000017802	Fam134c	TRE+NRE	20.3549	23.9529	23.7903	24.3633	25.5766	29.4054	27.4731	19.3245	22.1851	20.9701	22.4668	22.4905	26.5428	24.3634
ENSMUSG00000017817	Jph2	TRE	0.035709	0.48562	0.38873	0.568569	0.0100802	0.299947	0.00163143	0.0302254	0.466693	0.358564	0.555672	0.0115797	0.283161	0
ENSMUSG00000017830	Dhx58	TRE+NRE	12.8987	22.3604	39.7928	19.3308	16.3962	18.2045	16.8971	11.2124	19.2982	32.4367	16.3521	13.2471	15.0253	13.8669
ENSMUSG00000017831	Rab5a	NRE	40.8818	36.7886	33.3177	32.9544	27.3112	27.1839	28.5916	38.6861	34.5924	30.0196	30.7718	24.3823	24.7636	25.7079
ENSMUSG00000017832	Hspb9	TRE	0.343828	0.629228	0.308673	0.557899	1.06342	0.6967	0.898793	0.357168	0.570395	0.288142	0.538077	0.948288	0.544437	0.880246
ENSMUSG00000017837	Nkiras2	NRE	9.33728	10.0644	8.98757	10.0936	10.5871	11.407	10.6796	13.1465	14.1413	12.182	13.9661	14.9097	15.3589	15.6587
ENSMUSG00000017843	Ppp2r5c	NRE	20.9538	18.7501	18.2572	18.1358	16.0359	16.1753	16.8157	31.248	32.6911	27.8639	30.2755	24.5873	25.4333	25.7365
ENSMUSG00000017858	Ift52	NRE	21.0857	20.2729	21.6891	19.5691	19.6788	18.9615	19.5663	21.3624	20.6483	19.6443	18.841	18.1594	17.9418	18.1691
ENSMUSG00000017861	Mybl2	TRE	2.9015	6.20589	3.23876	5.38338	5.16748	3.17125	3.43387	3.32969	6.57857	3.22449	5.68247	5.25151	3.38096	3.58179
ENSMUSG00000017868	Sgk2	TRE	0.215808	1.17934	0.537774	1.8494	0.536031	1.60933	0.679985	0.21057	1.29377	0.616429	1.98116	0.498079	1.69941	0.616695
ENSMUSG00000017897	Eya2	TRE	87.6666	54.1464	90.1418	42.5237	50.2838	46.155	46.4025	85.0568	50.6751	82.4317	41.8531	46.6433	43.2784	43.2602
ENSMUSG00000017922	Prl3c1	TRE	0	0.388394	0	0.388438	0	0.177076	0	0	0.379734	0	0.365136	0	0.169306	0
ENSMUSG00000017929	B4galt5	NRE	4.79143	6.26091	15.5092	6.8715	8.35282	8.03949	8.2222	5.36537	7.3727	17.5254	9.03464	10.1316	9.3381	9.36262
ENSMUSG00000017943	Gdap1l1	TRE	0.050479	7.1813	2.26247	13.0217	24.4989	18.4604	26.3759	0.0939241	11.1726	3.01946	20.107	37.974	28.9054	40.8716
ENSMUSG00000017950	Hnf4a	TRE	0.150828	1.45905	0.66082	2.31556	0.438291	2.76703	0.746241	0.174994	1.62844	0.979898	2.7078	0.449107	3.09319	0.822107
ENSMUSG00000017969	Ptgis	NRE	0.00474344	0.998295	0.0373121	1.2009	0.124974	0.601512	0.127427	0.00689084	0.975802	0.0349413	1.19054	0.136795	0.64511	0.149138
ENSMUSG00000017978	Cadps2	NRE	3.70215	7.99633	18.675	7.03048	5.93436	7.70127	6.07802	6.19299	13.6545	30.1703	12.111	10.3114	12.8944	10.702
ENSMUSG00000017999	Ddx27	NRE	14.4146	12.7309	11.9336	11.2068	12.2025	10.4092	11.5228	17.4637	15.3457	13.5597	13.378	13.9089	12.3075	13.2801
ENSMUSG00000018001	Cyth3	TRE+NRE	7.55212	10.1064	6.67922	9.24476	16.2911	10.9099	17.3084	10.3025	13.564	8.23413	12.0847	20.7149	13.0775	21.6947
ENSMUSG00000018008	Cyth4	TRE	0.279977	1.64818	0.340287	2.29645	0.327843	1.76169	0.313386	0.26108	1.46197	0.315002	2.01565	0.277263	1.52438	0.267305
ENSMUSG00000018012	Rac3	NRE	29.6743	14.5237	9.8481	17.2444	36.1213	26.1167	38.2764	34.867	16.6282	10.643	19.9798	37.516	28.2043	41.2796
ENSMUSG00000018040	Rrp7a	NRE	15.6461	14.7549	10.2021	16.8602	23.5123	19.2208	24.5154	9.81798	9.18602	7.20001	10.492	15.2033	12.7874	15.851
ENSMUSG00000018042	Cyb5r3	NRE	19.6569	23.3369	24.3374	22.033	22.7305	24.8638	23.5778	40.2699	49.3004	49.4339	45.6569	41.5014	45.7497	42.5754
ENSMUSG00000018068	Ints2	NRE	6.97818	5.57768	5.27546	5.25918	4.66995	3.96944	3.93117	7.37497	5.86684	5.2371	5.61819	5.58173	4.48637	4.64213
ENSMUSG00000018076	Med13l	NRE	11.7718	11.4023	9.78848	10.5323	22.9965	13.9262	24.0965	11.027	10.5589	8.60264	9.70622	19.97	12.2602	21.0371
ENSMUSG00000018102	Hist1h2bc	NRE	35.5859	36.6445	53.1541	64.4533	65.9445	77.7263	67.5812	29.7832	30.0803	41.6016	52.146	47.4149	56.891	49.4288
ENSMUSG00000018126	Baiap2l2	not present	0.0354963	0.89472	0.872548	0.774248	0.175352	0.831963	0.249744	0.0325787	0.905529	0.895107	0.788776	0.174627	0.880015	0.237045
ENSMUSG00000018143	Mafk	NRE	8.3969	8.25767	8.50103	8.2457	9.73021	11.1648	10.5229	10.5697	10.3738	10.0726	10.2	11.6462	13.487	12.5766
ENSMUSG00000018160	Med1	TRE+NRE	11.8202	8.12321	8.58966	7.96095	8.36866	7.59299	8.00585	15.0131	9.0513	9.05403	8.69463	8.16077	7.40279	8.13248
ENSMUSG00000018166	Erbb3	NRE	0.232719	12.9424	10.2615	12.8211	8.41995	17.4508	11.9357	0.209646	11.4561	8.65876	11.3045	6.81027	14.7729	10.0297
ENSMUSG00000018167	Stard3	NRE	6.52752	9.84361	13.718	9.39739	9.81454	12.5073	10.2617	5.3973	7.93508	10.5799	7.53636	7.52017	9.70417	8.04406
ENSMUSG00000018168	Ikzf3	TRE	3.58997	1.95455	1.49071	2.34918	1.59073	2.64327	2.27723	3.52035	1.8458	1.36277	2.26049	1.43997	2.46668	2.13769
ENSMUSG00000018169	Mfng	NRE	0.820521	12.6402	6.83762	14.5802	17.6318	15.3265	17.2148	0.756089	11.4832	5.94344	13.0871	14.937	13.3105	14.6605
ENSMUSG00000018171	Vmp1	NRE	17.3119	28.7413	29.5752	34.6454	25.1628	37.7231	30.5678	18.6324	28.2116	26.4509	33.0362	22.0926	33.7544	26.9532
ENSMUSG00000018189	Uchl5	TRE+NRE	15.7254	16.5813	11.8762	16.0093	11.7559	10.727	11.5883	12.8312	13.2926	9.13251	12.6895	9.28023	8.48793	9.07799
ENSMUSG00000018196	Glrx2	NRE	5.63051	7.14824	6.80436	7.66546	8.92607	7.85101	8.84364	19.4441	21.6575	19.8056	21.9505	16.6149	19.6105	18.3292
ENSMUSG00000018199	Trove2	NRE	5.90455	5.17026	6.28904	4.77405	4.02511	4.0335	3.88036	5.84673	5.06966	5.87926	4.61449	3.62048	3.73093	3.55191
ENSMUSG00000018209	Stk4	NRE	11.5556	20.2699	14.8729	21.6145	23.9886	19.8742	24.4585	12.743	23.2596	16.5912	24.7287	30.3618	26.2629	33.6175
ENSMUSG00000018211	Wfdc15b	TRE	0.038014	3.4048	0.261642	2.83737	0.400618	2.26606	0.55923	0.04412	2.86972	0.203732	2.51501	0.297355	1.96174	0.361917
ENSMUSG00000018217	Pmp22	NRE	15.7054	1.98178	1.97579	1.74236	0.145956	0.884264	0.0901944	18.3662	2.32102	2.38099	1.93863	0.263505	1.11044	0.0831424
ENSMUSG00000018238	Gdf9	TRE	0.181589	0.337731	0.0416614	0.18316	0.10366	0.157451	0.139377	0.187641	0.324823	0.0409364	0.185751	0.0969468	0.14908	0.136256
ENSMUSG00000018239	Zcchc10	NRE	5.59781	3.92415	3.64693	3.86208	2.58502	2.65091	2.82957	5.28813	3.64847	3.31808	3.66514	2.30103	2.40434	2.60659
ENSMUSG00000018259	Prl8a2	TRE	0.0116824	0.811931	0	0.848412	0.384743	0.772375	0.418448	0.0129416	0.706518	0	0.711684	0.296259	0.625165	0.327688
ENSMUSG00000018263	Tbx5	TRE	0.0518444	2.66037	0.0869997	3.70058	1.89312	3.43678	1.61564	0.0288215	2.4526	0.0613662	3.43206	1.6848	3.08072	1.45161
ENSMUSG00000018286	Psmb6	NRE	204.282	160.96	112.837	132.988	155.772	150.795	155.145	164.692	127.657	86.3087	105.236	119.04	116.106	117.573
ENSMUSG00000018287	Spag7	NRE	49.3405	49.1041	40.0996	48.1244	57.1342	51.8127	58.3456	50.1494	47.5318	39.5144	48.9372	56.2246	50.414	56.4751
ENSMUSG00000018293	Pfn1	NRE	257.727	365.317	320.922	385.024	387.748	374.095	356.223	297.342	414.017	348.424	433.171	422.845	406.814	382.737
ENSMUSG00000018322	Tomm34	NRE	9.92071	11.9601	16.9371	14.3525	13.7358	12.8925	13.2037	10.678	12.4516	17.3262	15.2131	13.7771	13.1698	13.4975
ENSMUSG00000018326	Ywhab	NRE	74.2653	51.7165	50.9275	49.8015	46.7909	42.544	43.937	79.673	55.1394	51.6078	52.686	46.7674	43.579	44.9915
ENSMUSG00000018334	Ksr1	TRE	7.21816	21.958	12.589	22.7925	46.5674	34.3573	47.616	8.42827	25.8427	14.3249	26.4082	54.1662	39.7087	54.8924
ENSMUSG00000018339	Gpx3	NRE	2.31367	167.407	245.654	113.641	16.3474	91.1262	19.9216	2.69468	174.146	244.174	119.017	17.8191	94.541	21.3964
ENSMUSG00000018340	Anxa6	NRE	119.762	53.4344	149.128	40.3306	39.0598	40.0524	36.0614	90.2169	39.8944	106.193	30.1086	28.1879	29.2601	26.0707
ENSMUSG00000018341	Il12rb2	TRE	0.896519	9.09081	3.04458	10.3183	4.18656	9.58245	5.67273	1.17352	10.9469	3.57507	12.2675	4.78258	10.8936	6.47204
ENSMUSG00000018347	Zkscan6	TRE+NRE	4.67809	3.94301	4.63126	3.90597	3.61195	4.21698	4.04618	4.88914	3.86876	4.50462	4.14806	3.57551	4.23112	4.04433
ENSMUSG00000018362	Kpna2	NRE	35.5429	50.6588	21.6472	56.9701	49.5928	41.4554	46.9172	42.1299	58.859	25.3791	65.817	55.9592	46.6944	51.873
ENSMUSG00000018363	Smurf2	NRE	13.857	7.86462	13.2304	6.518	6.33964	5.79867	5.74462	15.248	8.59933	13.3207	6.84317	6.91055	6.11516	5.89676
ENSMUSG00000018372	Ccdc45	TRE+NRE	7.48263	6.91648	7.65607	6.19682	7.2416	6.22989	7.01857	7.29081	6.75977	7.16487	6.19712	6.49264	6.59556	6.82629
ENSMUSG00000018377	Vezf1	NRE	39.8833	12.2141	23.3348	9.44474	11.1397	8.52752	9.57308	39.9076	12.1036	22.0943	9.20033	10.2537	7.86983	8.76242
ENSMUSG00000018378	Cuedc1	NRE	37.6237	5.11475	13.5807	4.13434	4.13176	4.10222	3.84197	34.9885	4.71724	11.8804	3.83428	3.70151	3.66638	3.40528
ENSMUSG00000018379	Srsf1	NRE	48.4792	41.8392	33.6054	35.795	31.4031	25.5088	27.3049	100.186	84.0485	63.2242	71.8533	69.3487	57.8702	59.9746
ENSMUSG00000018381	Abi3	TRE	1.73794	1.19073	0.463505	1.47288	1.44184	1.39475	1.38627	2.66714	0.953421	0.354355	1.1666	1.38549	0.830666	0.961531
ENSMUSG00000018387	Shroom1	TRE	0.60224	1.1992	1.4835	0.986839	0.743246	0.90867	0.766349	0.663666	1.34309	1.59392	1.04072	0.790999	0.99042	0.837128
ENSMUSG00000018395	Kif3a	TRE+NRE	12.6637	9.48284	8.5733	9.57401	9.56533	9.38634	9.49664	19.5692	15.6965	11.6012	14.5679	14.5389	14.6863	14.2355
ENSMUSG00000018398	Sept8	TRE+NRE	22.1294	12.9136	17.7697	12.6356	13.5689	14.0973	13.6714	32.0207	19.2944	24.1065	18.6097	20.986	21.8081	21.6424
ENSMUSG00000018401	Mtmr4	NRE	27.863	24.981	20.2822	22.6744	26.9238	23.9311	26.0249	33.2336	29.765	22.8065	25.8676	31.3682	27.6857	30.2109
ENSMUSG00000018405	Mrm1	NRE	2.45364	2.56908	3.53267	2.64281	2.3838	2.63086	2.43816	2.39293	2.47882	3.30507	2.56908	2.24597	2.48845	2.22684
ENSMUSG00000018411	Mapt	TRE+NRE	0.478581	1.45313	0.57572	1.29866	0.31179	1.3583	0.436458	0.707146	2.07008	0.720299	1.75691	0.436409	2.16014	0.711818
ENSMUSG00000018412	1700081L11Rik	NRE	16.3397	10.2676	14.2982	9.70978	12.4351	10.7174	11.7286	23.0035	14.5027	19.1834	13.5971	15.8293	13.9997	15.082
ENSMUSG00000018415	4933439F18Rik	TRE+NRE	13.7063	7.37499	11.1028	6.42939	6.90587	4.95286	5.5418	13.3276	7.17189	10.2766	6.09986	6.25533	4.53139	5.09186
ENSMUSG00000018417	Myo1b	TRE+NRE	33.9046	13.4307	55.1016	7.43777	5.66882	7.25676	4.20281	33.4558	13.0637	51.4517	7.14692	5.28706	6.83824	3.98294
ENSMUSG00000018425	Dhx40	NRE	10.2355	14.0315	13.8938	13.3602	12.2493	12.2386	12.5719	8.64682	11.9057	11.2096	11.1566	9.61076	10.0125	9.96661
ENSMUSG00000018427	Ypel2	TRE+NRE	2.43392	5.60008	12.5911	5.02061	6.46863	6.34133	7.17805	2.46414	5.5662	11.9451	5.00274	6.09199	6.11017	6.83073
ENSMUSG00000018428	Akap1	TRE+NRE	3.77223	7.24356	7.82845	7.25482	6.41014	6.47713	5.72227	3.94044	7.46549	7.78785	7.42689	6.64882	6.76753	5.97685
ENSMUSG00000018433	Nol11	TRE+NRE	15.2907	13.9399	11.2786	12.8353	10.7863	9.35647	9.94826	13.2051	11.9086	9.22204	10.7973	8.6484	7.69084	8.05099
ENSMUSG00000018442	Derl2	NRE	7.49692	8.21788	6.2586	8.57857	7.79839	7.64547	8.24584	15.1159	15.582	11.0428	16.991	14.5625	15.4063	15.9476
ENSMUSG00000018446	C1qbp	NRE	65.4689	62.1239	41.6588	58.3119	59.4149	38.4521	52.6864	55.5805	52.407	33.8474	48.6488	46.8875	31.0065	41.7124
ENSMUSG00000018449	Rpain	NRE	5.86062	6.19073	8.72133	6.30938	6.7976	6.34127	8.09029	6.94031	7.09623	8.98186	6.74003	7.88179	7.53361	8.89298
ENSMUSG00000018459	Slc13a3	TRE	0.107791	1.63094	0.112042	3.08774	0.166339	2.2698	0.224563	0.0986718	1.55915	0.103917	2.88561	0.153765	2.11958	0.212811
ENSMUSG00000018470	Kcnab3	TRE	0.192429	0.858101	0.41205	0.746182	0.242227	0.565435	0.196929	0.179866	0.716979	0.322026	0.637953	0.173327	0.444457	0.144571
ENSMUSG00000018474	Chd3	NRE	46.1123	47.3327	43.8223	44.1684	60.2938	47.5612	53.1774	54.2429	55.854	47.1838	50.927	72.4119	55.8626	63.0726
ENSMUSG00000018476	Kdm6b	TRE+NRE	13.5779	10.8636	13.2352	9.33556	11.184	13.4071	11.6237	11.8744	9.50213	10.9476	8.03681	9.5153	11.3366	9.82439
ENSMUSG00000018479	1700125H20Rik	TRE	0.0872602	1.04636	0.0107249	0.81414	0.0143689	0.76843	0.153486	0.12787	1.33812	0.01549	0.95868	0.0177553	0.933651	0.177711
ENSMUSG00000018481	Appbp2	NRE	16.442	19.8097	10.6284	17.8472	19.6038	16.7111	20.2196	15.193	18.3278	9.29121	16.2575	16.9294	14.845	17.7907
ENSMUSG00000018486	Wnt9b	not detected	0.204184	1.31444	0.0165336	1.66699	0.677195	1.37468	0.574638	0.20776	1.3099	0.0162459	1.66127	0.654577	1.33006	0.553265
ENSMUSG00000018500	Adora2b	TRE	1.41765	0.719764	1.63105	0.967122	0.658672	1.52376	0.985765	1.4589	0.706623	1.57045	0.941054	0.631412	1.47497	0.927266
ENSMUSG00000018501	Ncor1	TRE+NRE	19.1564	15.8166	18.8843	15.7192	19.6092	16.8262	18.5973	46.2465	33.283	41.6719	34.1474	38.0849	32.9132	37.4368
ENSMUSG00000018507	Trpv2	NRE	1.54817	3.52285	1.0473	3.99836	2.44	3.20349	2.69816	1.30836	3.06144	0.795464	3.59127	1.98824	2.73909	2.29092
ENSMUSG00000018509	Cenpv	TRE	1.34611	5.01847	5.12365	6.55009	3.74051	5.35713	4.3655	1.16082	4.09716	4.05295	5.2504	3.02895	4.24767	3.52821
ENSMUSG00000018537	Pcgf2	not detected	36.2494	7.75138	14.3611	5.53598	6.77701	5.84683	6.25738	48.5774	10.3867	17.5425	7.22929	9.23329	7.70989	8.35352
ENSMUSG00000018541	Cwc25	NRE	4.63874	4.40092	4.42396	3.99671	4.00068	4.06897	3.91231	6.56833	6.02196	6.27872	5.44763	5.50176	5.87767	5.42543
ENSMUSG00000018543	1700001P01Rik	TRE	0.278282	0.442655	0.290723	0.280689	0.481151	0.414717	0.355987	0.17684	0.382388	0.183508	0.265756	0.349432	0.316312	0.261503
ENSMUSG00000018547	Pip4k2b	NRE	8.25465	3.11194	4.37755	2.24883	2.413	2.00466	2.02505	7.98374	2.95238	4.01696	2.1552	2.17948	1.8252	1.84942
ENSMUSG00000018548	Trim37	TRE+NRE	12.7816	21.2459	8.91089	21.4307	18.3733	17.5537	17.6089	20.9986	31.9634	13.2446	33.3448	29.6391	26.0703	28.5505
ENSMUSG00000018554	Ybx2	TRE	5.23783	2.15758	3.15368	2.21717	1.92521	2.14549	1.90783	5.3223	2.36088	3.22809	2.4259	1.82005	2.00458	1.79022
ENSMUSG00000018559	Ctdnep1	NRE	36.4012	37.6466	46.9221	38.0752	39.0423	38.4879	40.5198	30.5889	31.1004	37.1521	30.7574	30.8306	31.2137	32.0997
ENSMUSG00000018565	Rai12	NRE	17.7144	19.7407	18.2514	21.6438	21.6518	21.3379	21.2341	15.9472	17.7138	15.2044	19.3148	18.2721	18.6222	17.7934
ENSMUSG00000018566	Slc2a4	TRE	11.5969	6.87763	18.1927	6.42327	8.33239	9.19966	8.43791	10.3525	6.1291	15.5143	5.8298	7.0302	7.64553	7.04924
ENSMUSG00000018567	Gabarap	NRE	119.415	103.544	107.984	120.809	120.483	119.453	130.768	161.853	138.269	139.952	162.08	151.945	153.592	166.127
ENSMUSG00000018569	Cldn7	NRE	0.327339	46.6548	21.9807	61.3947	52.964	81.7561	69.0878	0.644158	76.0353	33.1487	96.7274	83.3847	134.262	106.276
ENSMUSG00000018570	2810408A11Rik	TRE+NRE	1.21177	2.9827	3.08859	2.33177	3.44059	2.41633	3.28839	1.21449	2.94481	3.0296	2.28134	3.20863	2.31781	3.0934
ENSMUSG00000018572	Phf23	NRE	15.9636	11.1034	13.7466	9.06719	10.5923	9.94648	11.2995	18.5099	12.3289	15.3303	11.3778	10.6205	10.3673	11.5907
ENSMUSG00000018574	Acadvl	NRE	58.4049	26.3192	28.3074	27.3975	31.9441	33.0804	33.793	47.57	21.0645	21.6993	21.6971	24.2651	25.2859	25.3521
ENSMUSG00000018581	Dnahc11	TRE	0.401049	1.2604	2.00427	1.19099	0.990593	0.970907	0.915568	0.0409106	0.717161	1.35308	0.702769	0.357913	0.561728	0.368826
ENSMUSG00000018583	G3bp1	NRE	38.221	31.82	27.3286	31.579	31.8657	26.5845	28.7122	79.3775	65.6641	54.4048	65.3709	62.8229	52.9083	56.7544
ENSMUSG00000018585	Atox1	NRE	68.8493	137.755	134.998	154.855	147.622	202.883	175.738	59.8692	117.566	108.49	129.676	117.268	165.024	140.768
ENSMUSG00000018589	Glra2	TRE	0.0508807	0.189279	0.0623301	0.35944	0.0857214	0.143897	0.0909761	0.0275452	0.168195	0.036352	0.318735	0.0500998	0.12196	0.0690561
ENSMUSG00000018593	Sparc	NRE	87.1739	38.9213	49.0971	32.5098	1.32403	25.5886	0.828985	87.0155	38.2311	46.1117	31.5952	1.46888	27.5088	0.777199
ENSMUSG00000018595	Glra4	not detected	0.130402	0.24369	0.104906	0.316868	0.101508	0.256972	0.0530772	0.100081	0.226164	0.0735661	0.268563	0.081611	0.216029	0.0147695
ENSMUSG00000018599	Smcr7	TRE	2.31605	3.04452	2.909	3.3292	3.19161	3.9505	3.49014	2.33213	2.96347	2.71134	3.24238	2.99278	3.73489	3.32337
ENSMUSG00000018604	Tbx3	TRE	0.0396171	5.8973	0.562778	7.04554	7.79539	7.54324	8.11137	0.0459906	6.09614	0.557488	7.25789	7.8126	7.60033	8.11917
ENSMUSG00000018620	Mmp20	not detected	0	1.60847	0.172642	2.3491	0.418961	1.60142	0.567884	0	1.5003	0.165469	2.21896	0.368631	1.40894	0.531241
ENSMUSG00000018623	Mmp7	TRE	0.111365	10.4652	9.40703	23.2723	10.0559	30.8118	14.1555	0.103943	9.1261	7.80174	20.1082	8.29112	26.4238	11.5004
ENSMUSG00000018634	Crhr1	TRE	0.0088164	2.67535	0.156038	4.24625	0.145177	2.92878	0.135339	0.00914685	4.53572	0.277897	6.65154	0.350716	4.82824	0.143763
ENSMUSG00000018648	Dusp14	TRE	13.0582	9.52493	5.36946	9.24481	5.31821	10.282	5.77539	17.9855	13.5342	7.09216	13.2644	7.5406	14.5582	8.49934
ENSMUSG00000018651	Tada2a	NRE	7.15028	4.213	4.70332	3.9518	2.74192	3.04412	2.1512	7.50359	4.3515	4.3983	4.13508	2.5679	3.0853	2.0822
ENSMUSG00000018654	Ikzf1	TRE+NRE	6.85578	29.6168	9.16225	25.9283	36.9226	25.1186	33.0234	10.2986	40.9783	12.2737	35.1951	55.7621	38.0532	51.4191
ENSMUSG00000018656	Fam115e	not present	0.14571	0.619116	0.20782	0.681555	0.461944	0.473778	0.501838	0.00344406	0.262925	0.0168745	0.26476	0.0420905	0.160029	0.0130855
ENSMUSG00000018659	Pnpo	NRE	2.07267	5.80107	5.58258	7.60242	8.37504	10.2643	10.2844	2.20664	6.0059	5.80305	7.94693	8.20208	10.0944	10.1452
ENSMUSG00000018661	Cog1	NRE	10.902	9.5942	11.8727	10.5365	12.4023	12.3123	12.6871	13.9364	12.2721	14.5528	13.5428	15.9285	16.5707	17.3632
ENSMUSG00000018666	Cbx1	TRE+NRE	19.9278	16.7106	19.4762	14.9899	17.5795	13.7181	15.8763	34.1617	27.217	28.8128	24.2784	26.5984	20.9128	24.3936
ENSMUSG00000018669	Cdk5rap3	NRE	17.3226	15.7148	15.8066	15.5934	17.088	17.3132	16.9388	18.8006	16.8507	16.5805	18.7973	16.9905	17.4679	17.8187
ENSMUSG00000018672	Copz2	NRE	94.5727	20.8248	61.6753	14.6076	22.4141	16.4048	22.6316	71.9038	15.5808	44.8005	10.9265	15.8834	11.7827	15.8943
ENSMUSG00000018677	Slc25a39	NRE	24.0282	12.5472	24.7528	12.3612	12.4283	14.3596	11.7605	37.2422	18.6939	37.157	20.9605	19.2017	21.8815	17.2635
ENSMUSG00000018678	Sp2	NRE	5.11178	6.21428	6.07643	6.7945	9.23613	7.62314	9.67656	5.7923	7.06751	6.46548	7.65203	9.91661	8.39933	10.4661
ENSMUSG00000018697	Aatf	NRE	12.5804	13.1776	13.752	13.0317	11.8174	10.504	9.69254	10.2138	10.7267	10.8484	10.6247	9.1727	8.39262	7.80398
ENSMUSG00000018698	Lhx1	TRE	0	0.866927	0.0291219	0.880417	0.139032	0.696101	0.198432	0	1.62603	0.0813209	1.28846	0.278594	1.54126	0.3473
ENSMUSG00000018707	Dync1h1	NRE	55.6566	58.0171	73.6653	48.7114	66.9984	57.9992	60.7971	73.1696	75.1753	88.1756	63.0854	78.6545	73.4435	72.6583
ENSMUSG00000018727	Cpsf4l	TRE	0.456765	0.642335	0.43014	0.707297	1.00003	0.70424	0.67895	0.47283	0.710796	0.327601	0.781587	0.994825	0.74662	0.605724
ENSMUSG00000018733	Pex12	NRE	4.91874	2.88553	3.04938	2.88452	2.98103	2.60506	2.88106	8.88837	5.63909	5.71436	6.07895	5.49526	5.1226	5.04809
ENSMUSG00000018736	Ndel1	NRE	18.6977	13.8949	15.4692	13.5662	12.831	15.5613	13.9569	22.6725	16.7485	17.913	16.0947	14.5987	17.9692	16.0151
ENSMUSG00000018740	Slc25a35	TRE	2.30716	9.56714	7.94803	11.4896	15.2645	12.5919	17.9998	2.40262	13.4446	9.70927	15.7068	20.1225	17.3773	24.3364
ENSMUSG00000018750	Zbtb4	NRE	8.41084	2.36839	7.55054	2.31864	4.35059	3.27967	4.67226	10.8476	3.1109	10.5492	3.64243	6.81205	5.43394	7.08007
ENSMUSG00000018752	BC096441	NRE	3.01086	9.36486	9.35978	11.6101	12.54	13.2007	15.1729	2.39224	10.2803	10.0444	14.0289	13.0043	15.8579	15.4277
ENSMUSG00000018761	Mpdu1	NRE	20.3381	32.2974	24.2951	30.4126	27.7878	33.4722	32.6856	24.6514	38.8785	26.9545	35.7913	31.3728	37.4762	36.9215
ENSMUSG00000018765	Fxr2	NRE	29.124	24.0879	28.0722	23.7597	30.2026	26.2802	30.4581	23.8337	19.6661	21.9058	19.1678	23.6087	20.8639	24.0714
ENSMUSG00000018770	Atp5g3	NRE	313.98	293.781	184.978	272.629	228.901	252.415	222.078	278.924	258.676	154.439	238.253	189.511	212.765	184.828
ENSMUSG00000018774	Cd68	NRE	1.6232	8.608	3.58255	8.81324	17.749	14.5796	21.9408	1.36235	7.63435	3.14863	8.10655	15.611	12.5587	19.2641
ENSMUSG00000018776	Amac1	TRE	0.120738	0.256072	0.191265	0.148845	0.273924	0.272626	0.283161	0.12316	0.242046	0.187358	0.151208	0.264343	0.251678	0.276997
ENSMUSG00000018796	Acsl1	NRE	16.4747	11.8843	13.5827	14.7124	21.5016	21.7991	25.7722	20.4898	16.035	15.665	19.5988	26.8234	27.1894	33.2115
ENSMUSG00000018800	Abca5	TRE+NRE	5.44867	8.17847	3.60668	8.87986	4.97991	6.86263	5.5801	5.28396	7.60508	3.35573	8.2974	4.55692	6.48719	5.44277
ENSMUSG00000018809	Smyd4	TRE	2.00975	1.74844	2.26841	1.677	1.60746	1.58792	1.51379	1.80294	1.56485	1.89917	1.46612	1.31801	1.32257	1.20453
ENSMUSG00000018819	Lsp1	NRE	8.22401	63.8436	3.59575	73.1022	66.709	80.3311	73.0269	10.1982	76.5019	4.12529	88.8853	76.6224	93.7049	84.7768
ENSMUSG00000018820	Zfyve27	NRE	11.6867	10.1059	10.5112	10.9152	14.4712	13.4846	14.7595	17.7796	16.6331	14.9747	17.5236	22.924	21.8269	23.0646
[truncated: 20,267 more rows]

## Sheet: local FDRs
	Local FDR scores for the calculated FPKMs
Ensembl ID	cTEC	mTEC	immature mTEC	mature mTEC	Aire neg mTEC	Aire pos mTEC	Aire ko mTEC
ENSMUSG00000000001	0	0	0	0	7.49105e-06	0	1.63644e-06
ENSMUSG00000000003	1	0.00830157	1	0.0200762	1	0.0312442	1
ENSMUSG00000000028	5.10967e-05	3.77414e-05	9.3138e-05	9.53926e-05	0.000171524	8.75572e-05	0.000322628
ENSMUSG00000000037	0.000166782	0.00198139	0.00403283	0.00225446	0.0229929	0.0106475	0.0303726
ENSMUSG00000000049	0.00106588	0.000130868	0.00231353	0.000101187	0.000316025	6.74337e-05	0.00032454
ENSMUSG00000000056	8.85667e-07	0	3.62457e-06	5.81544e-05	8.71779e-05	0.000129393	8.79492e-05
ENSMUSG00000000058	0.00021039	8.58488e-05	0.000116392	0.000172963	0.00244879	0.00058751	0.0019875
ENSMUSG00000000078	0	0	0	0	0	0	0
ENSMUSG00000000085	0	7.58813e-05	0	0.000119897	0.000218686	0.000283799	0.000280946
ENSMUSG00000000088	0	0	0	0	0	0	0
ENSMUSG00000000093	0.0053121	0.00313123	0.00105008	0.00627737	0.0175425	0.00344257	0.0146073
ENSMUSG00000000094	0.00941867	0.00200347	0.0275683	0.00272042	0.0331496	0.00539723	0.0423734
ENSMUSG00000000103	0.0559573	0.130865	0.311167	0.817451	0.590079	0.309183	0.679164
ENSMUSG00000000120	3.71546e-05	1.56072e-05	0	0.000104214	0.000697806	6.27447e-05	0.000742341
ENSMUSG00000000125	0.00235767	0.000265255	0.00335657	0.000218388	0.000513139	0.000131609	0.000587675
ENSMUSG00000000126	0.000179843	0.000707818	0.00215889	0.000935054	0.0115318	0.00152082	0.0109489
ENSMUSG00000000127	8.29351e-06	5.95945e-05	3.26995e-05	8.82566e-05	0.000101092	5.81946e-05	0.000130698
ENSMUSG00000000131	0	0	0	0	2.77635e-05	2.80334e-06	1.92288e-05
ENSMUSG00000000134	0	0	0	2.23915e-05	5.45169e-05	0.000121526	7.91898e-05
ENSMUSG00000000142	3.32573e-06	8.15462e-05	0.000199074	0.000136083	0.000148507	7.6354e-05	0.000191548
ENSMUSG00000000148	1.97041e-05	0.000105388	6.54778e-05	9.9875e-05	0.000181683	6.09768e-05	0.000228069
ENSMUSG00000000149	0	0	0	0	2.01666e-05	2.06534e-06	1.80228e-05
ENSMUSG00000000154	0.000174453	9.65786e-05	5.00218e-05	6.30965e-05	0.000370247	8.96282e-05	0.000310612
ENSMUSG00000000157	0.0495936	0.0016502	0.0313862	0.00102919	0.128214	0.00203027	0.159704
ENSMUSG00000000159	0.0208232	0.00170095	0.00145293	0.0010482	0.0104099	0.00168935	0.012177
ENSMUSG00000000167	0.000127576	0.000279494	0.000259972	0.000308072	0.00285149	0.000873782	0.00257018
ENSMUSG00000000168	0	1.05732e-06	1.12854e-05	4.75093e-05	7.96839e-05	9.89086e-05	8.97052e-05
ENSMUSG00000000171	0	0	0	0	1.66896e-06	0	0
ENSMUSG00000000182	0.0027403	6.31459e-05	0.00347401	9.31022e-05	0.0335894	0.000110082	0.056218
ENSMUSG00000000183	1	0.00333687	1	0.00339547	1	0.015893	0.219225
ENSMUSG00000000184	0	0	0	0	0	0	0
ENSMUSG00000000194	0	0	7.22943e-07	4.07399e-05	5.59161e-05	0.00012183	7.87501e-05
ENSMUSG00000000197	0.00261681	0.000281107	0.00778118	0.000636576	0.0161751	0.00134094	0.013689
ENSMUSG00000000202	1	0.000277975	0.00341762	0.0003836	0.0311724	0.00123396	0.0407947
ENSMUSG00000000204	0.00134068	0.000280325	0.00134685	0.000321512	0.0105725	0.00154583	0.0123334
ENSMUSG00000000214	0.00737269	8.98629e-05	0.0047901	6.11408e-05	0.00920445	7.75978e-05	0.00746566
ENSMUSG00000000215	0.00596283	5.13488e-06	0.00471918	4.68134e-05	0.13602	0.000119875	1
ENSMUSG00000000216	0.000161537	0.000264959	0.00177216	0.000218119	0.000249361	0.000120619	0.000257996
ENSMUSG00000000223	0.000807348	0.000186629	0.000289881	0.000205029	0.000676574	0.000345201	0.000883874
ENSMUSG00000000244	0.000944041	0.000283277	0.00735748	0.0003363	0.0367208	0.00098941	0.0259108
ENSMUSG00000000247	0.00931288	0.00192947	0.0750418	0.00218404	0.0349772	0.004359	0.0471987
ENSMUSG00000000248	0.000166926	0.000100816	4.69877e-06	0.000104033	0.000356706	5.93747e-05	0.000351768
ENSMUSG00000000253	0	0	0	2.17128e-05	0.00011819	0.000130003	0.000253886
ENSMUSG00000000263	0.131053	0.00123385	0.079238	0.00190651	1	0.00398157	0.330611
ENSMUSG00000000266	0	0	2.14679e-05	3.47566e-05	6.01003e-05	0.000121538	8.04987e-05
ENSMUSG00000000275	0	0	0	1.50247e-06	7.74174e-05	0.000117843	8.72162e-05
ENSMUSG00000000276	0.000161146	0.000209508	0.000200684	0.000217745	0.00113664	0.000630217	0.00128011
ENSMUSG00000000278	0.000165861	0	1.89138e-05	0	0	0	0
ENSMUSG00000000282	0	0.00010389	3.60907e-05	0.000116549	0.00023466	6.1e-05	0.000261382
ENSMUSG00000000290	0	0.000171487	0.00197038	0.000244758	0.00624545	0.000768132	0.00495582
ENSMUSG00000000295	0	4.21575e-05	4.5486e-05	0.000101673	0.000333169	0.000113234	0.000474481
ENSMUSG00000000296	4.99005e-05	0.000171831	0.000421855	0.00033101	0.00442745	0.0014484	0.00594627
ENSMUSG00000000301	0.000173806	2.95252e-05	0.000361309	5.89726e-05	0.000218966	6.89089e-05	0.000248417
ENSMUSG00000000303	0	0	0	0	0	0	0
ENSMUSG00000000305	0	9.86918e-05	0.00038734	0.000100287	0.000363764	6.80023e-05	0.000375536
ENSMUSG00000000308	0.000492492	0	0	0	0	0	0
ENSMUSG00000000317	0.00972321	0.010716	0.0249003	0.0161489	0.0421898	0.0313389	0.053011
ENSMUSG00000000318	0.00916866	0.00150204	0.0131819	0.00120124	0.0341776	0.00329404	0.0461353
ENSMUSG00000000320	0.000967953	7.93761e-05	0.000335629	0.000192613	0.00140198	0.000135165	0.00123125
ENSMUSG00000000325	0	9.08684e-05	6.25379e-05	0.000176657	0.000432347	0.000240377	0.000512714
ENSMUSG00000000326	0	0	0	0	3.43386e-05	5.8322e-06	4.72581e-05
ENSMUSG00000000339	0	0	0	3.34189e-06	5.54607e-05	0.000121923	8.15238e-05
ENSMUSG00000000340	0	2.72894e-05	5.21623e-05	6.5589e-05	0.00015029	5.84068e-05	0.000201348
ENSMUSG00000000346	0	0	0	0	0	0	0
ENSMUSG00000000355	0	0	0	0	4.94185e-05	0.000116575	7.64072e-05
ENSMUSG00000000359	0.0113267	7.65928e-05	0.000323049	0.000115768	0.000246275	9.09297e-05	0.000319389
ENSMUSG00000000365	0.00365343	0.00571972	0.0180599	0.00652329	0.0990413	0.0185971	0.118308
ENSMUSG00000000374	0	0	0	0	1.79034e-06	0	0
ENSMUSG00000000378	0	9.55533e-06	3.73647e-06	6.61108e-05	8.87111e-05	8.50842e-05	9.6656e-05
ENSMUSG00000000381	0.0250177	0.000287592	0.0427796	0.000391037	0.0778715	0.00144909	0.0728848
ENSMUSG00000000384	2.81367e-07	1.55041e-06	3.52148e-06	5.32797e-05	8.1369e-05	0.000103375	0.000101533
ENSMUSG00000000385	3.41308e-05	0	5.45979e-05	0	1.62422e-05	0	0
ENSMUSG00000000386	7.7871e-05	0	0	4.33426e-05	7.66788e-05	0.000125555	8.40183e-05
ENSMUSG00000000392	0.000172872	9.45777e-05	0.000452726	0.000103792	0.00224685	6.34074e-05	0.000874731
ENSMUSG00000000394	0.00395106	0	9.1483e-05	4.55066e-07	0.000435179	0.000130015	0.000374027
ENSMUSG00000000399	0	0	0	0	0	0	0
ENSMUSG00000000402	0.0048108	0.00122977	0.00505738	0.00201847	0.00834163	0.00477855	0.00775366
ENSMUSG00000000409	0	3.25329e-05	0.00014307	6.11509e-05	0.00062326	6.40753e-05	0.000505657
ENSMUSG00000000411	0.00697877	0.000276385	0.010615	0.000348892	0.000605589	0.00041074	0.000561212
ENSMUSG00000000416	0.00054294	0.000284374	0.000138538	0.000356729	0.0049552	0.000639911	0.00419188
ENSMUSG00000000420	0	0	0	0	4.34488e-05	0.000103285	6.79457e-05
ENSMUSG00000000435	1	0.0737609	0.248925	0.053576	1	0.0520308	0.295186
ENSMUSG00000000439	2.63762e-06	2.43807e-05	4.06085e-05	6.07353e-05	7.19915e-05	9.97025e-05	8.38513e-05
ENSMUSG00000000440	0.000756186	7.8407e-05	0.00153425	0.000136596	0.00206408	0.000199115	0.00123215
ENSMUSG00000000441	0	0	0	0	1.83904e-06	0	6.25332e-07
ENSMUSG00000000486	0	0	8.95254e-06	0	1.12442e-05	0	0
ENSMUSG00000000489	0.000662326	2.48483e-06	0.000114937	2.8561e-05	0.000112901	0.000104409	8.55811e-05
ENSMUSG00000000530	0.000804179	0.000864733	0.00215958	0.000955298	0.0159727	0.00217961	0.0123047
ENSMUSG00000000531	0.000179775	0	5.65181e-06	0	3.73037e-05	3.17481e-05	6.26924e-05
ENSMUSG00000000532	0	7.78243e-05	0	7.91066e-05	0.000280391	0.00011804	0.000277266
ENSMUSG00000000538	0	1.55711e-06	0	3.40017e-05	5.17435e-05	0.000114655	7.21587e-05
ENSMUSG00000000544	0.00198899	0	0	0	3.23837e-05	0	2.74804e-06
ENSMUSG00000000552	0	4.28143e-05	0	0.00010126	0.000330801	8.27228e-05	0.00055964
ENSMUSG00000000555	2.619e-05	9.37656e-05	8.09614e-05	0.000180129	0.00302391	0.000656989	0.00425902
ENSMUSG00000000560	0.0223243	0.0050986	0.0354386	0.007522	0.0588731	0.0166004	0.0625147
ENSMUSG00000000561	0	0	3.85162e-07	3.36549e-05	5.79758e-05	0.000123468	8.318e-05
ENSMUSG00000000562	0.00235821	0.00197683	0.00352984	0.0021292	0.000450281	0.00167211	0.000459437
ENSMUSG00000000563	0	0	0	0	0	0	0
ENSMUSG00000000567	0	0	0	7.76567e-06	3.72265e-05	9.04374e-05	4.89644e-05
ENSMUSG00000000568	0	0	0	0	3.46153e-05	2.84658e-05	4.78599e-05
ENSMUSG00000000579	0	1.94869e-05	2.04178e-06	5.98315e-05	8.7333e-05	9.62174e-05	0.000127668
ENSMUSG00000000581	0	3.97996e-07	8.482e-06	4.81225e-05	9.91362e-05	8.28279e-05	0.000111255
ENSMUSG00000000594	0.000211468	2.20315e-06	3.73315e-05	8.25188e-05	0.00313606	5.82121e-05	0.00245812
ENSMUSG00000000600	3.48728e-06	8.5067e-05	5.59581e-05	9.41052e-05	0.000160221	6.2464e-05	0.000215431
ENSMUSG00000000605	2.57265e-07	0	0	1.27649e-05	6.00343e-05	0.00012197	8.20278e-05
ENSMUSG00000000606	0.0305573	0.074544	0.208968	0.0508559	0.579023	0.167215	0.501684
ENSMUSG00000000617	0.013164	0.00575719	0.0450296	0.00675148	0.0542429	0.00649213	0.0523383
ENSMUSG00000000627	0.0159658	0.000938942	0.0320352	0.001742	0.0497155	0.00510067	0.0557174
ENSMUSG00000000628	0.000179451	9.79049e-07	0.000430025	6.41699e-05	5.55303e-05	0.000127131	7.27981e-05
ENSMUSG00000000631	0	0	0	0	2.69688e-05	2.15911e-06	2.59897e-05
ENSMUSG00000000632	0.0200365	8.94762e-05	6.94e-05	7.59083e-05	0.000189348	0.000127014	0.000235239
ENSMUSG00000000673	0.00923048	0.00132322	0.024378	0.00145038	0.00393357	0.00234381	0.00441734
ENSMUSG00000000682	2.98793e-05	0	0	0	0	0	0
ENSMUSG00000000686	0.000130045	0.000277608	0.000376544	0.000394358	0.000438124	0.000512074	0.000471046
ENSMUSG00000000690	0.028289	0.000556795	0.00730933	0.00140407	0.0270906	0.00286893	0.0201996
ENSMUSG00000000693	0.000175239	4.31596e-05	0.000120969	4.70702e-05	6.5877e-05	0.000121813	8.23774e-05
ENSMUSG00000000701	1	0.00666617	1	0.0149844	0.138234	0.0345998	0.294699
ENSMUSG00000000706	0.0147443	0.00174575	0.0304229	0.00216607	0.0259264	0.00782932	0.0216757
ENSMUSG00000000708	0	1.69366e-05	5.08294e-07	6.38198e-05	0.000271396	6.09649e-05	0.000284312
ENSMUSG00000000711	0	0	0	0	3.75922e-05	2.90992e-05	5.53405e-05
ENSMUSG00000000724	0.00717968	8.54288e-05	0.0379055	0.000103276	0.0917619	0.000690423	0.106675
ENSMUSG00000000730	0.00728071	0	0.00157275	0	5.02033e-05	2.62145e-06	3.82116e-05
ENSMUSG00000000731	0.000122919	0	0	0	0.00127795	0	4.10045e-06
ENSMUSG00000000732	0.000123424	0	0	0	0	0	0
ENSMUSG00000000738	0	0	0	0	3.68518e-05	1.73393e-05	5.43383e-05
ENSMUSG00000000739	0.000165514	1.45216e-05	0	0.000362924	0.000327082	0.00145779	0.00196337
ENSMUSG00000000740	0	0	0	0	0	0	0
ENSMUSG00000000743	0	0	0	0	1.74628e-05	0	5.54247e-06
ENSMUSG00000000751	0	0	7.81668e-06	4.72127e-05	8.32498e-05	7.24346e-05	0.000159934
ENSMUSG00000000753	0	0.000143708	0.000834023	0.000322502	0.00182185	0.000915214	0.00182104
ENSMUSG00000000759	0	0	0	1.02399e-06	3.62487e-05	0.00011405	5.57755e-05
ENSMUSG00000000766	0.0332714	0.00972712	0.0259963	0.0153742	0.0133724	0.0140796	0.0145686
ENSMUSG00000000776	4.76756e-06	1.87234e-05	2.84287e-05	7.34429e-05	0.000127304	5.9244e-05	0.000193632
ENSMUSG00000000782	0	0	8.69522e-05	0	0	0	0
ENSMUSG00000000787	0	0	0	0	0	0	0
ENSMUSG00000000791	0.000123042	0.000103671	0.000263574	0.000101157	6.32694e-05	5.90747e-05	7.80303e-05
ENSMUSG00000000792	0.000175985	0.000282004	0.000335801	0.000729862	0.000447693	0.000642018	0.000406826
ENSMUSG00000000794	0	7.69441e-05	6.93531e-05	0.000260012	0.000475847	0.000875858	0.00129481
ENSMUSG00000000804	0	2.83334e-05	6.93744e-05	6.20211e-05	8.49859e-05	0.00010744	8.79309e-05
ENSMUSG00000000805	0.00211611	0	0.00048009	0	0.00324926	1.68395e-05	0.0027419
ENSMUSG00000000811	0	0	0	3.76428e-05	4.06608e-05	0.000121529	6.9481e-05
ENSMUSG00000000817	0.0199588	0.019397	0.0836711	0.0429541	0.118576	0.0505713	0.121143
ENSMUSG00000000823	0	2.58995e-05	0	7.84466e-05	0.000105342	5.94311e-05	0.000177181
ENSMUSG00000000826	0	0	0	1.45513e-05	5.54261e-05	0.000121763	7.83677e-05
ENSMUSG00000000827	0	0	0	0	3.63032e-05	3.78181e-05	4.61563e-05
ENSMUSG00000000838	0	0	0	0	6.0418e-05	0.000121139	8.24943e-05
ENSMUSG00000000861	1.012e-06	0.000281929	0.000180639	0.00136682	0.00499326	0.00235041	0.00626928
ENSMUSG00000000869	0.0118326	9.55888e-05	0.0109367	0.000100104	0.000101744	6.29178e-05	8.61127e-05
ENSMUSG00000000876	0.000135392	8.07059e-05	0.000202007	0.000140769	0.00029211	6.76124e-05	0.000254781
ENSMUSG00000000881	2.32639e-07	4.76381e-05	3.19481e-05	0.000100589	0.000121354	6.3227e-05	0.000152852
ENSMUSG00000000884	0.000269224	0.000713503	0.000537446	0.00205455	0.00559613	0.00281663	0.00613461
ENSMUSG00000000889	0.02242	0.000100073	0.00596081	0.00019652	0.00177796	0.000223394	0.00276736
ENSMUSG00000000901	0.000698106	0.00121893	0.000103698	0.00610009	0.0206882	0.0105788	0.0178506
ENSMUSG00000000902	0	0	0	0	1.33801e-05	0	1.51777e-05
ENSMUSG00000000903	0.0446404	0.000249248	0.000348755	0.000363607	0.0122531	0.00125147	0.00969843
ENSMUSG00000000915	0	0	0	0	3.05747e-05	0	1.23272e-05
ENSMUSG00000000916	5.90923e-07	3.9466e-05	6.35727e-06	8.51481e-05	0.000113617	5.82297e-05	0.000180551
ENSMUSG00000000934	0	8.2174e-05	2.28397e-05	9.6662e-05	0.000162131	6.93365e-05	0.0003135
ENSMUSG00000000938	1	0.00325396	0.0625115	0.00667782	0.0149247	0.0123344	0.0161432
ENSMUSG00000000942	0.000129372	0.0119353	0.000655703	0.106146	0.0751088	0.316154	0.0843266
ENSMUSG00000000948	0.000113473	0	2.66803e-05	0	7.38788e-07	0	0
ENSMUSG00000000957	0	0	0	0	1.18305e-06	0	1.31839e-06
ENSMUSG00000000958	0.000148168	0	0	0	7.46916e-06	0	2.93169e-06
ENSMUSG00000000959	0	0	0	1.45183e-05	5.66718e-05	0.000121789	8.24416e-05
ENSMUSG00000000976	2.6866e-05	8.92909e-05	6.19208e-05	0.00010406	0.000155541	5.86781e-05	0.000226817
ENSMUSG00000000982	0.00267585	0.000103284	0.000247424	0.000103375	0.00225463	5.85302e-05	0.00282638
ENSMUSG00000000983	0.000179498	0	0	0	0	0	0
ENSMUSG00000001014	0.000421051	0.000546719	0.00171804	0.00056918	0.000395246	0.000832744	0.000428238
ENSMUSG00000001016	0	0	0	0	2.83896e-05	6.55776e-06	3.64585e-05
ENSMUSG00000001017	0	0	0	0	2.29396e-05	0	1.73314e-05
ENSMUSG00000001018	0	0	0	0	3.53005e-05	5.38474e-05	3.33671e-05
ENSMUSG00000001020	2.4588e-05	0	4.01025e-06	0	0	0	0
ENSMUSG00000001021	0	0	0	0	0	0	0
ENSMUSG00000001023	1	9.91895e-05	0.00461509	0.000100821	7.3681e-05	5.90451e-05	8.45048e-05
ENSMUSG00000001025	3.98447e-05	0	0	0	0	0	0
ENSMUSG00000001027	0.00612123	0.000272715	0.00153093	0.00034066	0.00102823	0.000620652	0.00102737
ENSMUSG00000001029	0.000130077	0.00311961	0.00339148	0.0014734	0.00690072	0.0019769	0.00524579
ENSMUSG00000001034	2.20757e-05	8.23695e-05	6.21711e-05	0.000164677	0.000374202	0.000142367	0.000416731
ENSMUSG00000001036	1.17684e-05	8.89073e-05	7.58955e-06	7.87744e-05	0.00012721	5.85094e-05	0.000173103
ENSMUSG00000001039	0	8.30483e-07	0	2.04697e-05	7.63952e-05	0.000128744	9.00211e-05
ENSMUSG00000001052	0	0	0	0	3.60252e-06	0	1.40408e-06
ENSMUSG00000001053	0.000136521	9.11579e-05	6.98025e-05	0.000191908	0.00031135	6.5013e-05	0.000250406
ENSMUSG00000001054	0	0	0	3.48917e-05	5.51567e-05	0.000120811	8.04601e-05
ENSMUSG00000001056	0	0	0	0	3.60294e-05	1.59569e-05	4.80522e-05
ENSMUSG00000001062	6.79435e-06	0.00010316	1.5511e-05	9.98799e-05	0.000231184	5.81901e-05	0.000230773
ENSMUSG00000001065	8.14184e-05	9.89307e-05	2.59541e-05	9.98394e-05	0.000180333	5.82059e-05	0.000212234
ENSMUSG00000001076	0.0144843	0.000105273	0.00399204	0.000111902	0.000191601	5.99535e-05	0.000172246
ENSMUSG00000001082	0	2.04954e-06	0	6.08079e-05	0.000100158	5.81816e-05	0.000146245
ENSMUSG00000001089	0	4.16492e-05	2.62859e-06	0.000101575	0.000247679	6.32423e-05	0.000317854
ENSMUSG00000001095	0	2.99465e-05	0.00023305	5.10468e-05	5.09411e-05	0.000121596	7.75448e-05
ENSMUSG00000001098	0	0	0	6.40187e-07	4.24495e-05	6.89504e-05	6.4944e-05
ENSMUSG00000001100	0	0	0	3.14183e-06	5.28108e-05	0.000121762	8.00099e-05
ENSMUSG00000001103	0.0371357	0.00183783	0.047117	0.00219557	0.0970582	0.0121327	0.231393
ENSMUSG00000001105	0	0	0	0	3.1489e-05	0	2.46789e-05
ENSMUSG00000001119	0	0	0	5.74819e-06	5.91737e-05	0.000127568	0.000229401
ENSMUSG00000001120	0	7.96629e-05	0.000223607	0.000102697	0.000491169	6.473e-05	0.000481841
ENSMUSG00000001123	0	0	0	0	2.44559e-05	0	1.969e-05
ENSMUSG00000001127	0	0	0	0	3.26683e-05	0	1.65903e-05
ENSMUSG00000001128	0.00012283	9.53869e-05	7.07148e-05	0.000104271	0.000912916	5.91119e-05	0.000467977
ENSMUSG00000001131	0.000157567	0	0	0	5.97772e-05	2.64248e-05	7.55479e-05
ENSMUSG00000001134	0	0	0	0	4.52067e-05	0.000121386	8.08596e-05
ENSMUSG00000001138	8.64483e-05	8.06897e-05	5.85105e-05	0.000192096	0.000496218	0.000335463	0.000610426
ENSMUSG00000001143	5.63986e-05	0.000103948	3.52956e-05	0.000104204	0.000170922	5.83318e-05	0.000231962
ENSMUSG00000001150	0	6.18682e-07	4.20633e-07	4.78308e-05	5.92689e-05	0.000126509	8.269e-05
ENSMUSG00000001151	3.78793e-05	1.16767e-05	2.29525e-05	7.07068e-05	0.000108939	5.92002e-05	0.000189637
ENSMUSG00000001155	0.102248	0.00353089	0.0540435	0.00350605	0.152331	0.00446614	0.0851821
ENSMUSG00000001156	0.000180097	0	0	0	0	0	0
ENSMUSG00000001157	0	0	0	0	2.30294e-05	2.83228e-06	1.01295e-05
ENSMUSG00000001158	0	0	0	0	3.61923e-05	5.00985e-05	4.63926e-05
ENSMUSG00000001166	0.000324601	0.000105229	0.000336034	0.000104286	0.00757638	0.000124878	0.00601467
ENSMUSG00000001168	0.00096719	7.95206e-06	0.000419796	2.30919e-05	0.0235221	8.14642e-05	0.0263103
ENSMUSG00000001173	6.90563e-06	0.000114538	6.55826e-05	0.00025417	0.00127418	0.000709709	0.00155238
ENSMUSG00000001175	0	0	0	0	6.97099e-07	0	0
ENSMUSG00000001211	0	0	0	0	3.62688e-05	1.38395e-05	4.40335e-05
ENSMUSG00000001225	0.00174858	0.00182122	0.00351948	0.00119981	0.00594416	0.00202482	0.00752644
ENSMUSG00000001227	0.00323187	0.000867245	0.00183803	0.000697341	0.000698709	0.000505669	0.000595405
ENSMUSG00000001228	0	0	0	0	1.68205e-05	3.04214e-05	4.3902e-05
ENSMUSG00000001229	0	0	0	2.72038e-06	3.6222e-05	7.95191e-05	5.14334e-05
ENSMUSG00000001240	0.00213753	0.000287326	0.00134475	0.000332696	0.023328	0.00145027	0.0487787
ENSMUSG00000001247	0	0	0	0	2.22273e-06	0	0
ENSMUSG00000001248	0	0	0	2.07007e-05	5.02366e-05	0.000121545	7.95593e-05
ENSMUSG00000001249	0.000171911	3.19148e-05	7.28207e-05	6.78051e-05	9.3018e-05	0.000127502	8.42237e-05
ENSMUSG00000001260	1	0.165267	0.150977	0.19718	0.0239472	0.0949033	0.0294772
ENSMUSG00000001270	0.000171052	0	3.49079e-06	0	5.21424e-05	0	6.4469e-05
ENSMUSG00000001280	0	3.35331e-07	0	5.98025e-05	8.56638e-05	7.79172e-05	9.83447e-05
ENSMUSG00000001281	0	0.00136211	0.000452757	0.00168777	0.00605578	0.00246257	0.00678303
ENSMUSG00000001285	0	0	0	1.41548e-05	4.69926e-05	0.000121834	7.72724e-05
ENSMUSG00000001288	0	8.20371e-05	0	0.000101753	0.000212682	5.81706e-05	0.000247738
ENSMUSG00000001289	0	0	0	0	0	0	0
ENSMUSG00000001300	0	0	0	4.13792e-07	4.91951e-05	2.92617e-05	6.76945e-05
ENSMUSG00000001305	0	2.25937e-05	4.10775e-05	0.000102755	0.000186601	8.19283e-05	0.000372964
ENSMUSG00000001313	8.94044e-05	0.00013122	0.000213513	0.000231864	0.00144327	0.00043472	0.00137505
ENSMUSG00000001323	0	2.86851e-05	0	6.28949e-05	0.000132664	5.88462e-05	0.00017666
ENSMUSG00000001333	0.000227341	0.000105307	1.53108e-05	9.64807e-05	0.00012037	5.86051e-05	0.000137103
ENSMUSG00000001334	0.000683954	0.000208649	0.00184426	0.000295125	0.00884528	0.000859096	0.006387
ENSMUSG00000001348	0.000126844	3.11303e-05	0.000492295	6.14316e-05	0.00185903	9.08901e-05	0.0006758
ENSMUSG00000001349	0.00613683	1.50214e-05	0.0184153	9.69838e-05	0.105539	7.77021e-05	0.138938
ENSMUSG00000001366	0	5.20831e-06	0	4.58007e-05	7.69103e-05	0.000122371	8.45244e-05
ENSMUSG00000001376	1.66255e-05	5.37888e-05	6.9403e-05	7.99334e-05	0.000151397	5.89457e-05	0.000247347
ENSMUSG00000001379	1.43397e-06	0.000102538	1.10922e-05	0.000104074	0.000299785	5.85117e-05	0.000333538
ENSMUSG00000001380	0	0	0	0	1.06192e-05	0	6.62968e-06
ENSMUSG00000001383	0	0	0	0	3.63227e-05	1.67227e-05	5.11416e-05
ENSMUSG00000001403	7.15514e-06	9.0072e-06	0.000153088	3.79715e-05	8.4271e-05	5.85092e-05	0.000158673
ENSMUSG00000001415	0	0	0	1.55515e-05	5.03927e-05	0.000121892	7.95388e-05
ENSMUSG00000001416	0	0	0	0	0	0	0
ENSMUSG00000001417	0.00553614	7.89934e-05	0.000212888	6.13702e-05	0.000435578	0.000122067	0.00035453
ENSMUSG00000001418	3.23166e-06	2.30885e-06	0	3.8435e-05	7.49443e-05	0.000121735	8.31862e-05
ENSMUSG00000001419	0	9.74618e-06	0	5.89886e-05	7.56985e-05	0.000123844	8.32021e-05
ENSMUSG00000001420	0.000160855	0.000103259	6.76558e-05	0.000191535	0.00152799	7.37353e-05	0.000694174
ENSMUSG00000001424	0	0	0	0	1.554e-05	0	1.10306e-05
ENSMUSG00000001435	0	0	0	5.6613e-05	0.000188986	9.39148e-05	0.000355568
ENSMUSG00000001436	0.000122868	0.000322946	0.000486214	0.000392742	0.00416024	0.000873028	0.00491468
ENSMUSG00000001440	0	0	0	0	6.51243e-07	0	6.79715e-07
ENSMUSG00000001441	0	0	0	0	3.09258e-05	4.27558e-06	1.83587e-05
ENSMUSG00000001444	0.0001948	0	0.000446151	0	3.36789e-05	7.27526e-06	1.58768e-05
ENSMUSG00000001445	0	0	0	2.00537e-06	4.20446e-05	9.48051e-05	7.0094e-05
ENSMUSG00000001467	0	0	8.87684e-06	0	4.56762e-05	1.96776e-05	7.18965e-05
ENSMUSG00000001472	0	0	0	0	0	0	0
ENSMUSG00000001473	0	0	0	0	3.33746e-05	0	6.3221e-05
ENSMUSG00000001482	0	7.37126e-05	7.81275e-06	9.11033e-05	0.000138129	8.70321e-05	0.000142953
ENSMUSG00000001493	0.000657117	8.54044e-05	0.000215535	0.000102639	0.000417395	5.81821e-05	0.000319127
ENSMUSG00000001494	0.0284849	9.66744e-05	0.00413344	9.28139e-05	0.00820915	5.88905e-05	0.00546495
ENSMUSG00000001496	0.0106313	0.00146075	0.0153807	0.00313152	0.0197687	0.00427288	0.0284789
ENSMUSG00000001497	0	0	0	4.86078e-06	4.72505e-05	0.00011974	7.23059e-05
ENSMUSG00000001504	1	1.20458e-06	0	1	1	1	1
ENSMUSG00000001506	0.000405689	0	0.000894193	0	0.0109777	0.000121539	0.00809665
ENSMUSG00000001507	0	0	0	0	1.21992e-06	0	0
ENSMUSG00000001508	0.0900886	0.00103597	0.00393896	0.000377641	0.00717197	0.00119275	0.0061736
ENSMUSG00000001510	0.000191204	1.76018e-05	0.000788818	6.16575e-05	0.000405677	8.79641e-05	0.000363582
ENSMUSG00000001517	0	7.98656e-05	9.76645e-05	0.000104293	0.000246237	0.000213536	0.000390993
ENSMUSG00000001518	3.17716e-05	9.78064e-05	5.90638e-05	0.000103657	0.000139543	5.87263e-05	0.000200772
ENSMUSG00000001520	9.15079e-05	0.000131278	0.000462087	0.000273837	0.00469373	0.000672751	0.00526319
ENSMUSG00000001521	0	0	0	1.50277e-05	5.05813e-05	0.000122516	7.94497e-05
ENSMUSG00000001524	0	3.56359e-05	6.05218e-05	7.32857e-05	9.64989e-05	5.91092e-05	0.00012295
ENSMUSG00000001525	0	0	0	0	0	0	0
ENSMUSG00000001542	0	0	3.41807e-06	0	2.41775e-05	5.36685e-06	7.10764e-06
ENSMUSG00000001552	0	0	0	0	0	0	0
ENSMUSG00000001555	0	7.81997e-05	4.06183e-06	0.00124891	0.00632682	0.00342157	0.0135965
ENSMUSG00000001558	0.00214323	0.0129324	0.00602862	0.00861285	0.0129165	0.00963472	0.0107173
ENSMUSG00000001566	1	0.00665778	0.146044	0.0143958	0.315864	0.0141632	0.116423
ENSMUSG00000001569	1.51898e-06	7.28363e-05	5.54372e-05	0.000101602	0.000224217	6.53603e-05	0.000315736
ENSMUSG00000001576	0	0	0	3.66134e-05	6.79024e-05	9.37908e-05	9.34466e-05
ENSMUSG00000001583	4.21481e-05	2.84925e-05	4.33717e-07	6.30718e-05	7.90386e-05	0.000111297	8.7632e-05
ENSMUSG00000001588	3.75309e-05	0.000284637	0.00128594	0.000229218	0.00417225	0.00100997	0.00500549
ENSMUSG00000001604	0.00838755	9.42333e-05	0.000520935	0.000226659	0.0286799	0.000558761	0.0269131
ENSMUSG00000001622	0.0181498	0.000294272	0.00355247	0.000243997	0.00318902	0.000746555	0.00282742
ENSMUSG00000001627	0	0	0	0	5.18631e-05	0.00011611	7.68699e-05
ENSMUSG00000001630	1.92463e-06	0.000105381	2.76691e-06	0.000100714	0.000326701	6.50307e-05	0.000336631
ENSMUSG00000001632	7.74055e-06	5.28865e-05	2.05937e-05	8.5185e-05	0.000102365	6.31734e-05	0.000129672
ENSMUSG00000001642	1.04112e-06	0	0	2.84334e-05	0.000101843	7.41218e-05	0.000191633
ENSMUSG00000001655	1	0.00235376	0.0181389	0.00791616	0.115287	0.0185166	0.106383
ENSMUSG00000001656	0.0169731	7.66116e-05	0.00154646	6.13439e-05	0.000303396	0.000113319	0.000311057
ENSMUSG00000001657	0.017951	0.000737622	0.00795704	0.00123775	0.0205494	0.00320218	0.0227052
ENSMUSG00000001661	0.0478364	0.00111526	0.00447441	0.00054712	0.00257776	0.000833167	0.00220863
ENSMUSG00000001663	0.000175953	0	6.58791e-05	0	0.000100304	3.96565e-05	8.3225e-05
ENSMUSG00000001665	0	0	4.66398e-06	4.86315e-07	6.23188e-05	3.89374e-05	8.03704e-05
ENSMUSG00000001666	0	0	0	0	3.25166e-05	0	1.91934e-05
ENSMUSG00000001670	0.0333891	0.000289768	0.0258064	0.000218152	0.0902356	0.00100531	0.0876053
ENSMUSG00000001672	0.00280959	0.000105331	8.07516e-05	0.000102454	0.000212287	6.22753e-05	0.000222113
ENSMUSG00000001674	0	0	0	0	3.83648e-05	0.000118356	6.71213e-05
ENSMUSG00000001687	0	0	0	0	1.51765e-05	0	2.54283e-06
ENSMUSG00000001700	0	0	0	3.7444e-06	3.88408e-05	0.000105145	6.34367e-05
ENSMUSG00000001707	0	0	3.65318e-05	1.21696e-05	6.26691e-05	0.000125696	8.32159e-05
ENSMUSG00000001729	0	0	0	0	2.98577e-06	0	1.88572e-06
ENSMUSG00000001739	0.00351642	0.00153379	0.0110669	0.00164568	0.0176935	0.00183425	0.0118137
ENSMUSG00000001741	0.000138447	0.000550414	0.00169384	0.00111722	0.00277973	0.00165967	0.00300337
ENSMUSG00000001750	0	1.44221e-05	0	8.19257e-05	0.000102014	7.10129e-05	0.000152248
ENSMUSG00000001751	0.000123018	9.75289e-05	0.000129801	0.000180888	0.000486849	0.000111312	0.0003866
ENSMUSG00000001755	0	1.47132e-06	1.84835e-06	4.8511e-05	6.33806e-05	0.000126412	8.31712e-05
ENSMUSG00000001761	0	3.66139e-07	0	9.95246e-05	0.00018538	0.000101084	0.000413559
ENSMUSG00000001763	0.00225623	3.80492e-06	0.000636489	4.2379e-05	4.671e-05	0.000122693	6.92922e-05
ENSMUSG00000001767	0	0	1.95664e-06	2.10538e-05	6.70522e-05	0.000128348	8.32043e-05
ENSMUSG00000001768	0	0	0	3.77777e-07	3.39285e-05	1.85932e-05	2.21605e-05
ENSMUSG00000001773	0.0664881	0.00135033	0.0186882	0.00183752	0.367816	0.00516619	0.361399
ENSMUSG00000001774	0	0	0	0	3.59216e-05	1.88553e-05	3.9011e-05
ENSMUSG00000001783	0	0	0	0	0	0	0
ENSMUSG00000001785	0	0	0	1.56643e-06	4.72014e-05	0.000120308	7.72285e-05
ENSMUSG00000001786	2.14655e-07	1.86533e-05	6.93321e-05	5.93359e-05	5.86597e-05	0.00012966	8.03142e-05
ENSMUSG00000001794	0	0	0	0	0	0	0
ENSMUSG00000001802	0.000166048	0.00294993	0.000553198	0.00585177	0.0117358	0.00519022	0.0156146
ENSMUSG00000001804	0.00120227	0.000100617	0.000369704	0.000152731	9.15853e-05	7.48601e-05	0.000115969
ENSMUSG00000001815	0.220091	0.0331821	0.371961	0.0502095	1	0.106542	1
ENSMUSG00000001819	0.135044	0.00406741	0.390988	0.0102662	1	0.0871017	1
ENSMUSG00000001823	1	0.114909	1	0.168295	1	0.313485	1
ENSMUSG00000001827	0.03998	0.000290205	0.00157988	0.000336949	0.0154454	0.000997167	0.00691592
ENSMUSG00000001829	9.69644e-05	9.69739e-05	7.10118e-05	0.000100295	0.000171848	5.91222e-05	0.000265062
ENSMUSG00000001833	0	0	0	0	3.58431e-05	2.07948e-05	4.21426e-05
ENSMUSG00000001844	0	2.98495e-06	1.07799e-06	5.90277e-05	8.08648e-05	0.000100124	8.98867e-05
ENSMUSG00000001847	0	0	0	0	0	0	0
ENSMUSG00000001855	1.34645e-06	2.78347e-05	2.73589e-05	7.5012e-05	8.99131e-05	5.98553e-05	0.000112238
ENSMUSG00000001864	0.000127363	0	1.73986e-05	0	0	0	0
ENSMUSG00000001865	0.00535565	0.00316404	0.0667322	0.00191318	0.127179	0.0122258	1
ENSMUSG00000001870	0.000127012	9.84178e-05	0.000222755	0.000245134	0.00400241	0.000574726	0.00499455
ENSMUSG00000001891	0	0	0	0	6.34783e-05	0.000119159	8.08574e-05
ENSMUSG00000001901	0.000179862	0	4.48681e-06	0	8.45599e-07	0	0
ENSMUSG00000001909	0	8.72005e-07	0	5.90893e-05	7.16062e-05	8.80366e-05	9.06014e-05
ENSMUSG00000001910	0	0	0	0	3.45353e-05	1.56647e-05	4.12965e-05
ENSMUSG00000001911	0	0	0	3.5746e-05	6.71213e-05	0.000128788	8.71723e-05
ENSMUSG00000001918	0.000173848	3.73269e-05	0.000103974	7.96196e-05	0.000475274	7.07682e-05	0.000921807
ENSMUSG00000001924	0	0	0	0	0	0	0
ENSMUSG00000001930	0.00468266	9.94041e-05	0.000176897	0.000106795	0.000159135	5.8999e-05	0.00024408
ENSMUSG00000001942	0.000156204	0.000105226	2.3148e-05	9.39604e-05	0.000397818	5.92672e-05	0.000362118
ENSMUSG00000001943	0.0580071	0.00272797	0.00212047	0.00672799	0.0279591	0.00689445	0.0208444
ENSMUSG00000001946	0.000894259	0.000269991	7.95028e-05	0.000161693	0.000725997	0.000407384	0.000748315
ENSMUSG00000001948	3.7115e-07	1.17509e-06	0	4.95062e-05	0.000168801	5.88678e-05	0.00021377
ENSMUSG00000001962	0	0	0	0	3.07468e-05	6.98982e-07	2.33141e-05
ENSMUSG00000001964	0	0	0	0	1.68399e-05	0	6.68236e-06
ENSMUSG00000001983	0	3.85885e-05	3.68795e-05	9.04605e-05	0.000113807	5.83744e-05	0.00016562
ENSMUSG00000001985	0.0101775	0.000298167	0.00909281	0.000544229	0.00660226	0.00154657	0.008113
ENSMUSG00000001986	2.89285e-05	3.50121e-07	0.000229798	2.07155e-05	4.5139e-05	0.000122817	7.45596e-05
ENSMUSG00000001988	0.00304155	0.000277582	0.00824074	0.000399396	0.0345572	0.00163013	0.0372176
ENSMUSG00000001995	0	7.88982e-05	0.000224673	8.49106e-05	0.000112068	6.4273e-05	0.0001493
ENSMUSG00000001998	4.60507e-05	8.01967e-05	0.000104143	0.000169154	0.000386804	0.000224058	0.000386999
ENSMUSG00000001999	3.57875e-07	1.24916e-05	5.11681e-05	5.74547e-05	0.000140538	7.30345e-05	0.000188775
ENSMUSG00000002006	0.000315685	0.00027882	0.000246235	0.000851435	0.00416104	0.00136984	0.0046191
ENSMUSG00000002007	0.0205155	0.00343487	0.00221539	0.00631389	0.0404949	0.00780107	0.0403411
ENSMUSG00000002010	0	0	0	0	0	0	0
ENSMUSG00000002012	0.000155774	0.00140781	0.00142104	0.00201284	0.0106723	0.00324773	0.0119427
ENSMUSG00000002014	0	0	0	0	0	0	0
ENSMUSG00000002015	0	0	0	0	1.73246e-06	0	0
ENSMUSG00000002017	0	0	0	0	3.26564e-05	3.37012e-06	3.1926e-05
ENSMUSG00000002020	0.000122826	0	0	8.5257e-07	3.51283e-05	1.25153e-05	2.47344e-05
ENSMUSG00000002028	7.88253e-07	2.33184e-05	0	8.18285e-05	6.88192e-05	6.88111e-05	8.53583e-05
ENSMUSG00000002031	0	0	0	5.62852e-06	5.61414e-05	0.000119953	7.47352e-05
ENSMUSG00000002032	0.000141085	0.000288737	0.00024865	0.000296934	0.00311472	0.000510203	0.00285489
ENSMUSG00000002033	0	6.71957e-05	0.000456834	7.44894e-05	0.0017932	0.000108791	0.00236927
ENSMUSG00000002043	0	0	0	0	1.68044e-05	0	5.51264e-06
ENSMUSG00000002052	0	0	0	0	1.10716e-05	0	4.07307e-06
ENSMUSG00000002055	1.36456e-05	6.14074e-06	0.000120681	4.86988e-05	8.99641e-05	6.16707e-05	0.000164934
ENSMUSG00000002057	0	0	0	0	0	0	0
ENSMUSG00000002058	0	0.000100597	1.34474e-06	0.000116341	0.000398012	0.000159299	0.000602857
ENSMUSG00000002059	0	2.46265e-05	0	0.000101912	0.000309441	7.90972e-05	0.000361886
ENSMUSG00000002064	0	0	0	0	4.53177e-06	0	8.15685e-07
ENSMUSG00000002068	0.000177277	0.000105286	0.000209696	0.000108014	0.000383091	0.000426631	0.000899854
ENSMUSG00000002076	0.00916515	0.000594085	0.00429769	0.00131874	0.00284289	0.00165361	0.00248002
ENSMUSG00000002083	4.88238e-05	7.26069e-06	6.99437e-05	6.09103e-05	7.10137e-05	0.000125088	8.31425e-05
ENSMUSG00000002100	0.0127169	5.23271e-05	0.0223876	6.23256e-05	0.0700198	5.86071e-05	0.0632285
ENSMUSG00000002102	0	0	0	0	0	0	0
ENSMUSG00000002103	3.41059e-07	2.72688e-06	5.84897e-06	4.09443e-05	7.64374e-05	0.000129825	8.35426e-05
ENSMUSG00000002104	0.0110065	0.00308367	0.00193296	0.00616367	0.0177556	0.00753018	0.0308195
ENSMUSG00000002105	9.8742e-06	0.000102212	2.80582e-05	0.000112013	0.000347939	8.21339e-05	0.000327661
ENSMUSG00000002107	0	0	0	5.65076e-05	7.11242e-05	8.62763e-05	8.37137e-05
ENSMUSG00000002108	0.000169845	0.000100937	0.00021815	0.00010382	0.000701942	5.86713e-05	0.00050712
ENSMUSG00000002109	3.16566e-07	3.9925e-07	2.17065e-06	9.55939e-06	6.31752e-05	0.00012221	7.96188e-05
ENSMUSG00000002111	0.00426825	7.65891e-05	0.00157072	0.000121232	0.0188106	0.000558442	0.0181987
ENSMUSG00000002129	0	0	0	4.32964e-07	3.70079e-05	8.18401e-05	6.46903e-05
ENSMUSG00000002147	0	0	0	0	1.27154e-05	0	2.46976e-06
ENSMUSG00000002190	0.107099	0.00420482	0.0563118	0.00385371	0.369448	0.0133009	1
ENSMUSG00000002204	0.00125644	0	0.000675208	0	9.23555e-05	0.000109713	8.31975e-05
ENSMUSG00000002205	0	0	0	9.80886e-07	3.83838e-05	7.42911e-05	5.84465e-05
ENSMUSG00000002210	0	4.7348e-07	7.21346e-07	3.92407e-05	6.4919e-05	0.000125666	8.31453e-05
ENSMUSG00000002221	1.43353e-05	2.89366e-05	3.59062e-05	8.27961e-05	0.000149408	5.87038e-05	0.000242541
ENSMUSG00000002222	0	0	0	2.70874e-05	7.67567e-05	0.000129296	8.57456e-05
ENSMUSG00000002227	0	5.85129e-06	0	6.09265e-05	0.000121259	0.000127367	0.000104513
ENSMUSG00000002228	0.0142349	0.000192548	0.00088459	0.000185365	0.00155943	7.55417e-05	0.000784122
ENSMUSG00000002233	0	0	0	0	3.82536e-06	0	0
ENSMUSG00000002240	1	0.0386626	0.0861436	0.0523495	1	0.0533368	1
ENSMUSG00000002249	0	0	0	5.6177e-05	6.49423e-05	0.000121677	8.17795e-05
ENSMUSG00000002250	1.27012e-06	0	2.23124e-06	5.57236e-05	7.58439e-05	0.000122177	8.32009e-05
ENSMUSG00000002257	0	6.82516e-06	0	5.16856e-05	5.83395e-05	0.000116417	8.13e-05
ENSMUSG00000002265	1.33822e-05	6.85532e-05	6.95368e-05	0.00017558	0.000777939	0.000507316	0.00113996
ENSMUSG00000002266	0.0185347	0.00815252	0.033595	0.00739493	0.251105	0.0296818	0.271038
ENSMUSG00000002274	0.000124182	0.000101172	0.00020777	0.000184235	0.000376674	0.000538912	0.000452246
ENSMUSG00000002279	0.000142303	0.000118882	0.000142069	0.000159044	0.000348181	0.000117249	0.000337968
ENSMUSG00000002280	3.99377e-07	1.17516e-06	7.83846e-07	5.84818e-05	8.19132e-05	0.000121503	8.9075e-05
ENSMUSG00000002289	0.000175753	0.000502625	9.15537e-05	0.00348132	0.0168171	0.010179	0.0223717
ENSMUSG00000002297	2.68769e-05	2.25862e-05	0.000196728	6.22698e-05	0.000180145	7.46062e-05	0.000283537
ENSMUSG00000002307	0	0	6.66298e-07	4.94226e-05	6.76352e-05	0.000124442	8.31828e-05
ENSMUSG00000002308	4.30082e-06	9.00017e-05	0.000211729	0.000159033	0.000384821	0.000182869	0.000387561
ENSMUSG00000002319	0	0	0	1.80484e-06	4.76115e-05	0.00012168	8.29011e-05
ENSMUSG00000002320	0	0	0	0	3.61788e-05	7.06231e-06	4.60819e-05
ENSMUSG00000002324	0.000262319	0.00017366	0.000345958	0.000235896	0.00144273	0.000266718	0.000688029
ENSMUSG00000002325	0	0	0	2.54694e-06	6.93557e-05	0.000121415	8.37643e-05
ENSMUSG00000002326	0	0	0	5.31288e-06	4.32881e-05	0.000121542	7.81465e-05
ENSMUSG00000002329	0	0	0	0	3.54774e-05	1.04125e-05	3.19357e-05
ENSMUSG00000002332	0	0	0	0	3.57424e-05	8.16856e-06	3.77139e-05
ENSMUSG00000002341	0.00743213	0.000290788	0.00354759	0.000459303	0.0189403	0.001978	0.0200952
ENSMUSG00000002342	6.37288e-06	8.6965e-05	2.61504e-05	0.00010131	0.000152381	5.84219e-05	0.000201949
ENSMUSG00000002343	4.45693e-05	8.02698e-05	0.000133988	0.000138164	0.000298716	7.3235e-05	0.000332287
ENSMUSG00000002345	0	0	0	0	3.22523e-05	2.69628e-06	2.0817e-05
ENSMUSG00000002346	0	0	3.60439e-06	0	5.55581e-06	5.92583e-07	0
ENSMUSG00000002365	0	0	0	0	3.5746e-05	3.83694e-06	3.39045e-05
ENSMUSG00000002372	0	0	0	0	3.51187e-05	1.61038e-05	3.8697e-05
ENSMUSG00000002379	0	0	0	0	3.56507e-05	3.10214e-05	4.72726e-05
ENSMUSG00000002384	0.00955965	0.00281799	0.0438873	0.00360931	0.0213202	0.00973269	0.0400343
ENSMUSG00000002393	0	0	0	0	3.49078e-05	0	3.09259e-05
ENSMUSG00000002395	0	0	0	0	0	0	0
ENSMUSG00000002396	2.19199e-05	8.93263e-05	4.28111e-05	0.000104266	0.00012645	7.40622e-05	0.000153509
ENSMUSG00000002409	0	8.92649e-05	9.82255e-06	9.83895e-05	9.19307e-05	7.71348e-05	9.3931e-05
ENSMUSG00000002413	2.40082e-05	3.88999e-05	3.43747e-05	6.61057e-05	8.58894e-05	7.7418e-05	9.68707e-05
ENSMUSG00000002416	1.00867e-05	3.19851e-05	6.55182e-05	6.76246e-05	9.0813e-05	7.00969e-05	9.38949e-05
ENSMUSG00000002428	3.79842e-05	4.76656e-06	2.10877e-05	4.6963e-05	9.37907e-05	7.23549e-05	0.000114979
ENSMUSG00000002455	0	0	0	0	1.05372e-05	0	2.55644e-06
ENSMUSG00000002458	1.31353e-06	0	1.63929e-06	1.30078e-05	6.65301e-05	0.00012941	8.32005e-05
ENSMUSG00000002459	0.00193631	7.71586e-05	0.000267326	8.09603e-05	6.15551e-05	7.45746e-05	8.25901e-05
ENSMUSG00000002475	0.000177648	0.000275335	0.000256283	0.00034392	0.00276383	0.000663837	0.00246041
ENSMUSG00000002477	0	0	0	0	9.85681e-06	0	1.75737e-05
ENSMUSG00000002486	1.23741e-05	0.000103329	6.1712e-05	9.98409e-05	0.000322164	6.18442e-05	0.000352844
ENSMUSG00000002489	0	0	0	0	3.88514e-05	2.11196e-05	6.687e-05
ENSMUSG00000002496	0	0	0	7.77027e-06	3.89699e-05	0.000106063	6.30312e-05
ENSMUSG00000002500	0.00897625	0.00756494	0.0719118	0.0069332	0.0579176	0.00912856	0.0843774
ENSMUSG00000002504	0.000175509	0.000199238	0.000244004	0.000322171	0.00218217	0.000490993	0.00265246
ENSMUSG00000002524	0	0	0	0	0	0	0
ENSMUSG00000002546	0	0	0	0	3.59516e-05	9.61037e-06	3.67967e-05
ENSMUSG00000002550	1.89043e-07	1.5357e-05	1.03934e-06	6.01927e-05	8.69814e-05	0.000107853	9.9487e-05
ENSMUSG00000002565	3.42224e-05	0	4.28211e-07	0	3.41965e-05	0	2.7319e-05
ENSMUSG00000002578	0.000140044	0.000764076	0.000463331	0.00147358	0.00389469	0.00186426	0.00481182
ENSMUSG00000002580	0	0	0	0	0	0	0
ENSMUSG00000002588	0.0277054	0.00720354	0.0690039	0.00486627	0.103099	0.0249082	0.162547
ENSMUSG00000002602	3.96144e-05	0	0	0	0	0	0
ENSMUSG00000002603	0	3.42347e-07	4.99358e-05	2.43933e-05	4.8175e-05	0.000124173	7.65795e-05
ENSMUSG00000002608	0	3.78499e-06	2.0594e-06	5.48204e-05	6.53288e-05	0.000122124	8.26941e-05
ENSMUSG00000002617	0.000170856	0.000529416	0.000367206	0.000947119	0.00324683	0.00206133	0.00363071
ENSMUSG00000002625	0	0	0	2.41291e-06	3.64955e-05	4.35653e-05	5.38302e-05
ENSMUSG00000002633	0.0461797	0.00058506	0.00697093	0.00104655	0.0345951	0.00167257	0.0305954
ENSMUSG00000002635	0	1.52757e-06	1.31737e-05	4.62041e-05	6.21896e-05	0.000129773	8.31547e-05
ENSMUSG00000002658	0	0	0	0	3.33951e-06	0	6.84278e-07
ENSMUSG00000002660	0	0	0	3.34782e-06	3.88233e-05	8.72093e-05	6.20533e-05
ENSMUSG00000002661	0	5.75379e-05	1.6593e-05	6.71173e-05	8.33078e-05	0.000113886	8.48672e-05
ENSMUSG00000002664	0.000650154	0.00237006	0.000468882	0.00235789	0.00532765	0.00397162	0.00514989
ENSMUSG00000002668	0.000130921	0.000101789	0.000879654	0.000203274	0.000201429	0.000142403	0.000215541
ENSMUSG00000002679	0	0	3.19173e-07	5.00702e-05	8.35836e-05	7.64944e-05	0.000105159
ENSMUSG00000002688	2.57604e-05	9.92033e-05	0.000180498	9.92043e-05	0.000166752	6.42634e-05	0.000205267
ENSMUSG00000002699	0.000177541	0.000286833	0.00163892	0.000256247	0.00549236	0.00085758	0.00454047
ENSMUSG00000002718	0	0	0	0	3.77864e-05	0.000105355	7.01918e-05
ENSMUSG00000002728	0	0	0	2.00897e-05	7.5019e-05	0.000127746	8.32979e-05
ENSMUSG00000002731	0	2.2089e-05	4.16018e-07	6.82153e-05	0.000165556	5.99914e-05	0.000231933
ENSMUSG00000002732	2.77412e-05	0.000288437	9.3563e-05	0.000714292	0.00330995	0.00380271	0.00472256
ENSMUSG00000002733	0	0	0	4.95581e-06	4.83674e-05	0.000121551	6.96596e-05
ENSMUSG00000002741	0	0	0	0	3.17117e-05	0	2.56456e-05
ENSMUSG00000002748	0	0	0	6.0456e-07	3.62931e-05	8.00582e-05	5.70788e-05
ENSMUSG00000002763	0	0	0	1.42394e-05	4.178e-05	8.99489e-05	6.43051e-05
ENSMUSG00000002767	0	0	0	0	3.63408e-05	1.79084e-05	5.15977e-05
ENSMUSG00000002768	0	0	0	0	5.49835e-06	0	1.21471e-06
ENSMUSG00000002769	0.000166858	0	0.00112698	7.37356e-06	8.04388e-05	0.000119171	8.31939e-05
ENSMUSG00000002771	0.00269839	7.75537e-05	0.000451682	0.000159368	7.50121e-05	5.88635e-05	8.31979e-05
ENSMUSG00000002778	0	0	0	0	9.26414e-06	0	2.54296e-06
ENSMUSG00000002781	6.78334e-05	7.88549e-05	0.000137358	0.000146751	0.000407412	0.000118464	0.000387904
ENSMUSG00000002797	0.000132764	0.00186949	0.00082401	0.00294919	0.00834267	0.00495566	0.0101599
ENSMUSG00000002799	0	0	0	0.000104269	8.39075e-05	7.8871e-05	0.000293334
ENSMUSG00000002803	1.86778e-05	0.000102475	6.38199e-05	0.000227444	0.000684806	0.000412184	0.000827166
ENSMUSG00000002804	0	0	0	0	2.75771e-05	0	1.35462e-05
ENSMUSG00000002808	4.69567e-07	0.000115079	8.76179e-05	0.000341917	0.00387974	0.00215427	0.00600862
ENSMUSG00000002812	0	0	0	0	1.60421e-05	0	5.45482e-06
ENSMUSG00000002814	0.000117043	8.6979e-05	7.98107e-05	0.000138894	0.000404617	0.000128413	0.000444332
ENSMUSG00000002820	0	0	0	1.2679e-06	3.69777e-05	3.03608e-05	4.28032e-05
ENSMUSG00000002825	2.18646e-05	9.38866e-05	4.89068e-05	0.000158464	0.00030642	8.98502e-05	0.000332194
ENSMUSG00000002831	0.00261953	0.00577994	0.0199854	0.00679071	0.0429529	0.00616622	0.0395275
ENSMUSG00000002833	0	0	0	0	3.5581e-05	1.92122e-05	4.54364e-05
ENSMUSG00000002835	5.61539e-06	1.04655e-05	6.41421e-05	8.60856e-05	0.000135532	7.54789e-05	0.000314368
ENSMUSG00000002844	0	0	0	0	1.53542e-05	0	5.88593e-06
ENSMUSG00000002845	0	0	1.38593e-05	1.39724e-05	6.38873e-05	0.000121476	8.18987e-05
ENSMUSG00000002846	0	0	2.36253e-06	2.06148e-05	6.80438e-05	0.00012164	8.3091e-05
ENSMUSG00000002847	0.000640774	0	0.000239431	0	0	0	0
ENSMUSG00000002870	0	0	0	5.15311e-05	6.99268e-05	5.83155e-05	0.000139248
ENSMUSG00000002871	4.896e-07	9.23125e-05	5.80873e-07	9.57148e-05	0.000113026	7.23082e-05	0.000119944
ENSMUSG00000002881	0	0	5.7904e-07	3.58545e-05	0.000102406	0.000117749	0.000123399
ENSMUSG00000002885	0.000166212	0.000101442	0.000217635	0.000104186	0.000376541	6.20046e-05	0.000381441
ENSMUSG00000002897	0	2.66881e-06	4.7951e-05	4.65968e-05	4.50108e-05	0.000122561	7.34186e-05
ENSMUSG00000002900	0	0	0	6.076e-05	6.17968e-05	8.21557e-05	8.36491e-05
ENSMUSG00000002908	0.000130981	8.74522e-05	0.00126407	0.000144245	0.00101309	6.2481e-05	0.000969049
ENSMUSG00000002910	0.000171277	1.81331e-06	2.68701e-05	1.91233e-05	3.66287e-05	4.45032e-05	3.55265e-05
ENSMUSG00000002930	0.0112125	0.000105697	0.0243424	0.000115975	0.0151839	0.000937331	0.0140712
ENSMUSG00000002944	0.000533607	0.000297661	0.000873022	0.000414685	0.0300536	0.00213146	0.025186
ENSMUSG00000002948	0	0	0	3.64766e-05	5.83008e-05	0.000121789	8.18403e-05
ENSMUSG00000002949	0	0	0	0	3.57745e-05	1.28521e-05	3.48644e-05
ENSMUSG00000002957	0	0	0	2.94092e-05	7.01878e-05	0.000121592	8.3675e-05
ENSMUSG00000002963	0	0	0	1.12426e-05	5.30426e-05	0.0001166	7.40711e-05
ENSMUSG00000002968	0	0	0	5.6681e-07	3.77778e-05	4.45968e-05	5.55601e-05
ENSMUSG00000002980	0	0	0	4.74518e-05	0.000368671	0.000114235	0.000334665
ENSMUSG00000002981	0	0	0	0	6.55681e-06	0	1.56677e-06
ENSMUSG00000002983	0	0	0	0	0	0	0
ENSMUSG00000002984	0	0	0	0	3.61124e-05	1.8557e-05	6.17833e-05
ENSMUSG00000002985	0	0	0	0	3.4268e-05	0	3.77899e-05
ENSMUSG00000002992	0.000792589	0	0.000256783	0	3.67948e-05	0	4.77867e-06
ENSMUSG00000002996	0	0	0	0	3.62934e-05	1.96363e-05	4.32283e-05
ENSMUSG00000002997	0.000618045	0.000512424	0.00044092	0.00118509	0.0273163	0.00333512	0.0352187
ENSMUSG00000003031	0	0	0	2.47053e-05	7.92263e-05	0.00012005	8.54085e-05
ENSMUSG00000003032	1.35837e-05	0	0	0	4.32576e-05	0	5.22793e-05
ENSMUSG00000003033	0	0	0	0	3.59935e-05	3.86827e-05	4.68556e-05
ENSMUSG00000003037	0	0	0	7.70449e-06	5.56481e-05	0.000119208	8.00427e-05
ENSMUSG00000003038	0	0	0	0	9.65658e-06	0	1.25926e-05
ENSMUSG00000003039	0	0	0	0	4.82697e-06	0	1.43008e-06
ENSMUSG00000003051	0.000179905	0	0	0	1.67858e-05	0	9.36103e-07
ENSMUSG00000003053	0.00058652	0.000105233	0.000753318	0.000101647	0.000890986	7.08354e-05	0.00129367
ENSMUSG00000003062	0	0	0	3.41829e-07	4.02533e-05	0.00011339	6.56593e-05
ENSMUSG00000003068	0	0	0	0	7.92987e-06	0	2.42142e-06
ENSMUSG00000003070	0.000542968	0.000285833	0.000469768	0.0010031	0.00309203	0.00182736	0.00416388
ENSMUSG00000003072	0	0	0	0	0	0	0
ENSMUSG00000003099	0	0	0	0	1.57678e-05	0	8.48028e-06
ENSMUSG00000003119	2.54785e-07	2.64224e-05	3.33704e-05	6.3637e-05	0.000101505	6.75474e-05	0.000131285
ENSMUSG00000003123	0.000674224	0.00105301	0.000441909	0.00126336	0.00478254	0.00173978	0.0051557
ENSMUSG00000003131	0	0	0	4.75874e-07	4.64267e-05	0.000121255	7.904e-05
ENSMUSG00000003134	3.51986e-07	0	0	0	0	0	0
ENSMUSG00000003135	2.28017e-07	1.55793e-05	3.67763e-05	6.14249e-05	0.000108059	6.31209e-05	0.000133073
ENSMUSG00000003153	0.000695128	0.000100922	0.0019736	0.000100241	0.00881005	0.000586414	0.0166679
ENSMUSG00000003154	0	1.62595e-06	5.71649e-07	5.03356e-05	4.30379e-05	0.000121528	6.91139e-05
ENSMUSG00000003161	0	0	0	0	1.72559e-06	0	0
ENSMUSG00000003166	0	0	0	1.85752e-05	6.25344e-05	0.000121972	8.31883e-05
ENSMUSG00000003178	0	9.13608e-07	0	5.28468e-05	5.96642e-05	0.000125017	8.30429e-05
ENSMUSG00000003184	0	0	0	1.52372e-06	3.82268e-05	6.05685e-05	5.99946e-05
ENSMUSG00000003190	1.45989e-05	0.000105279	6.87512e-05	0.000106945	0.000318217	0.000107739	0.00032046
ENSMUSG00000003198	0.000180077	8.2076e-05	0.000211942	0.000181178	0.000908656	0.000684612	0.000802077
ENSMUSG00000003199	0	0	0	0	3.15713e-05	1.25721e-06	2.77009e-05
ENSMUSG00000003200	0	0	0	0	4.18376e-05	6.39804e-05	6.99414e-05
ENSMUSG00000003206	0.000754571	0	0.00015713	0	3.61612e-05	0	2.13672e-05
ENSMUSG00000003208	3.0102e-07	3.16795e-06	2.2071e-05	5.50444e-05	7.10027e-05	0.000130024	8.28075e-05
ENSMUSG00000003226	0	0	0	0	1.69904e-05	8.36445e-06	8.53742e-06
ENSMUSG00000003227	3.01325e-06	0.00010299	5.55999e-06	0.000445962	0.00171124	0.00190318	0.00469043
ENSMUSG00000003228	0	0	0	0	5.02597e-06	0	1.13415e-06
ENSMUSG00000003233	0	0	0	4.65409e-05	5.19508e-05	0.000121342	7.84776e-05
ENSMUSG00000003234	0	0	0	1.30655e-05	4.65073e-05	0.00011308	7.15445e-05
ENSMUSG00000003235	0	0	0	0	0	0	0
ENSMUSG00000003269	0	0	0	4.376e-07	3.88434e-05	4.85153e-05	5.56589e-05
ENSMUSG00000003271	0.0028738	0	6.93587e-05	2.42899e-05	9.14014e-05	0.000121223	8.32328e-05
ENSMUSG00000003273	0.0106313	0.000425129	0.000460565	0.000818269	0.00352507	0.00105058	0.00382389
ENSMUSG00000003279	0.00414306	0.00634286	0.0196274	0.00471976	0.00469908	0.00404504	0.00442902
ENSMUSG00000003282	0.000125064	0.000322187	0.000307153	0.00099924	0.0027529	0.00193971	0.00276476
ENSMUSG00000003283	0.00229561	7.19696e-05	0	6.45899e-05	0.000871237	0.000117379	0.000363024
ENSMUSG00000003299	0	0	0	0	2.91037e-05	0	1.60103e-05
ENSMUSG00000003308	0	0	0	1.48447e-05	3.65852e-05	0.000105333	5.3133e-05
ENSMUSG00000003309	0	0	0	0	0	0	0
ENSMUSG00000003316	0	0	0	0	2.28207e-05	2.34838e-06	1.15766e-05
ENSMUSG00000003341	1	0.0107222	0.0652281	0.00762559	0.0439344	0.0161227	0.0570501
ENSMUSG00000003344	0	3.05221e-07	0	2.3652e-05	4.94963e-05	0.000121808	7.90889e-05
ENSMUSG00000003345	0	0	0	0	2.6899e-05	0	1.59775e-05
ENSMUSG00000003346	0	0	0	1.02614e-06	3.84785e-05	3.07627e-05	5.52294e-05
ENSMUSG00000003348	0	0	0	0	0	0	0
ENSMUSG00000003352	2.59421e-06	0	0	0	1.61758e-05	0	4.91261e-06
ENSMUSG00000003354	0.00108848	0.00028003	0.000688313	0.000434728	0.0302332	0.00192669	0.0121586
ENSMUSG00000003355	0.000718963	0.000104718	0.00457958	9.98438e-05	0.0144427	0.000416994	0.0124859
ENSMUSG00000003360	0	0	0	0	3.39629e-05	4.15936e-06	3.45589e-05
ENSMUSG00000003363	0	0	0	6.38111e-07	3.746e-05	6.12893e-06	4.87349e-05
ENSMUSG00000003378	0.000139802	7.65816e-05	8.7324e-05	0.000124824	0.000312621	7.03302e-05	0.000314443
ENSMUSG00000003379	0.0116534	0.000109304	0.00792821	0.000243367	0.00885367	0.000688828	0.00808068
ENSMUSG00000003380	0	0	0	0	0	0	0
ENSMUSG00000003382	0	0	6.07395e-06	0	1.55659e-05	0	2.51664e-06
ENSMUSG00000003402	0	0	0	0	0	0	0
ENSMUSG00000003410	0.00869888	0.000316824	0.00730968	0.000650658	0.00794503	0.00145988	0.00745279
ENSMUSG00000003411	0.036949	0.000154814	0.000849245	0.000311185	0.0627622	0.00115405	0.0274223
ENSMUSG00000003418	0.00125592	0.000542208	0.000288266	0.000735218	0.00737112	0.001214	0.0054697
ENSMUSG00000003420	0	6.22792e-05	5.46316e-07	8.89666e-05	0.000272636	0.000116554	0.000155731
ENSMUSG00000003421	0	0	0	2.65175e-06	3.97026e-05	8.59154e-05	6.47226e-05
ENSMUSG00000003423	0	0	0	0	3.14315e-05	3.86022e-06	2.88099e-05
ENSMUSG00000003429	0	0	0	0	0	0	0
ENSMUSG00000003435	0	0	0	0	0	0	0
ENSMUSG00000003436	0.00205338	0.000100274	6.54864e-05	0.00017332	0.000324316	0.00059754	0.00061806
ENSMUSG00000003437	0	0	0	0	8.08405e-07	0	0
ENSMUSG00000003438	0	0	0	0	3.72605e-05	0.000100044	6.64735e-05
ENSMUSG00000003444	0	5.56248e-06	1.32616e-05	5.0022e-05	8.11375e-05	0.000129425	9.21943e-05
ENSMUSG00000003452	0.000174613	0.000104778	0.000236104	9.36798e-05	7.97042e-05	7.73036e-05	8.34197e-05
ENSMUSG00000003458	0	0	0	0	1.43842e-05	0	3.7508e-06
ENSMUSG00000003464	0	0	0	9.75079e-07	4.3333e-05	9.52943e-05	6.933e-05
ENSMUSG00000003469	0.000203494	0.000102559	0.0004161	0.000215056	0.00473465	0.000542305	0.0042365
ENSMUSG00000003476	0.165526	0.00209868	0.038324	0.00173456	1	0.00510956	0.246258
ENSMUSG00000003477	0	0.000132914	0.0110925	0.000140471	0.0110254	0.000670247	0.00698858
ENSMUSG00000003484	0.0016793	0.00012379	0.000743834	0.000196992	0.0046435	0.000406801	0.00474533
ENSMUSG00000003500	0	9.25266e-05	0.000127431	0.000169994	0.00131428	0.00053163	0.00219299
ENSMUSG00000003505	0.29205	0.000410578	0.0476633	0.000276711	0.244299	0.00143347	0.0841536
ENSMUSG00000003518	0.000122831	0.000384473	0.000564562	0.000728312	0.00408386	0.0016208	0.00425969
ENSMUSG00000003526	0.000137602	0.000102023	0.000131194	7.83711e-05	0.000138731	6.01364e-05	0.000200188
ENSMUSG00000003527	1.6335e-06	5.13319e-05	4.40339e-05	9.0155e-05	0.000106818	5.97368e-05	0.000135504
ENSMUSG00000003528	0	0	0	0	3.80427e-05	7.97396e-06	5.74311e-05
ENSMUSG00000003531	0	3.09161e-05	0	8.11453e-05	9.53619e-05	6.73421e-05	0.000152409
ENSMUSG00000003534	0	0	0	1.99708e-05	6.22479e-05	0.000112582	8.3206e-05
ENSMUSG00000003541	0	0	0	3.23232e-05	0.000157773	0.000124643	0.000115239
ENSMUSG00000003545	0	0	0	0	6.40954e-06	0	6.42793e-07
ENSMUSG00000003546	0	4.074e-07	0	1.82898e-05	4.22729e-05	2.83873e-05	5.61779e-05
ENSMUSG00000003549	2.50883e-07	1.14793e-05	7.5518e-06	6.0386e-05	7.76631e-05	0.000100701	8.48134e-05
ENSMUSG00000003555	0.000849756	7.73037e-05	0.00541032	9.27004e-05	0.000194891	6.58831e-05	0.000148031
ENSMUSG00000003559	0	0.00010133	0	0.000103985	0.000124375	6.01812e-05	0.000191785
ENSMUSG00000003573	0	2.7633e-05	0	0.000101986	0.000120681	5.92471e-05	0.000180613
ENSMUSG00000003575	1.11932e-06	0.000100797	5.24203e-05	0.000118745	0.000368957	8.24948e-05	0.000410561
ENSMUSG00000003581	0	4.78451e-06	0	6.33831e-05	6.92481e-05	0.000113745	8.31878e-05
ENSMUSG00000003585	0.000165925	8.57531e-05	0.000118245	0.000103378	0.000227801	5.8267e-05	0.000275585
ENSMUSG00000003604	8.44556e-05	9.84482e-05	0.000186494	9.29161e-05	8.616e-05	5.81704e-05	0.000110658
ENSMUSG00000003617	0.000831066	0.000167591	0.000233717	0.000171785	0.00181418	0.000500333	0.00186734
ENSMUSG00000003623	0	0	0	1.57866e-06	6.37141e-05	9.13341e-05	7.9068e-05
ENSMUSG00000003644	0	3.40361e-06	7.88194e-06	3.86802e-05	9.11231e-05	0.000121554	8.52635e-05
ENSMUSG00000003657	0.00332626	0	0.00396762	0	1	3.44033e-05	0.264335
ENSMUSG00000003660	0	0	0	0	1.46301e-06	0	0
ENSMUSG00000003662	0	8.43054e-07	2.77874e-06	3.96603e-05	6.56949e-05	0.000128552	8.30874e-05
ENSMUSG00000003665	0.00955222	0.00025621	0.0709501	0.000232535	0.0702679	0.000705989	0.295869
ENSMUSG00000003680	7.16098e-05	9.31632e-05	0.000126175	0.000134283	0.000290405	0.000102346	0.000356437
ENSMUSG00000003721	0	0	0	0	3.6342e-05	1.17753e-05	4.3576e-05
ENSMUSG00000003731	0	8.23479e-07	3.87232e-07	4.68889e-05	7.40306e-05	0.000125295	8.47027e-05
ENSMUSG00000003746	6.16898e-06	1.97719e-06	0	6.2931e-05	9.20623e-05	6.11962e-05	0.000113683
ENSMUSG00000003752	6.55081e-05	2.34888e-05	1.60535e-06	9.16047e-05	0.000121262	0.000125515	0.000115403
ENSMUSG00000003762	2.07178e-06	1.30036e-05	1.11434e-05	6.01422e-05	8.92968e-05	0.000125942	8.90416e-05
ENSMUSG00000003778	0	0	0	1.35601e-06	4.38902e-05	0.000116127	7.54882e-05
ENSMUSG00000003779	0	0	1.13407e-06	5.23182e-07	4.94998e-05	0.00013	8.3195e-05
ENSMUSG00000003808	0	0	0	1.38562e-05	4.52446e-05	0.000119594	7.45044e-05
ENSMUSG00000003809	0	4.63103e-07	3.12122e-06	2.91616e-05	8.20314e-05	0.000125946	8.83884e-05
ENSMUSG00000003810	4.0788e-07	5.5426e-06	3.34999e-06	5.39936e-05	8.4353e-05	0.000129538	8.72473e-05
ENSMUSG00000003812	0.000150004	4.36668e-05	1.38789e-06	0.000103924	0.000171877	5.81656e-05	0.000199839
ENSMUSG00000003813	0	0	0	1.08968e-06	3.82737e-05	0.000101661	6.05411e-05
ENSMUSG00000003814	0	0	0	0	0	0	0
ENSMUSG00000003824	4.5565e-05	8.60189e-05	0.000236861	0.000103435	0.000301685	6.4045e-05	0.000357765
ENSMUSG00000003847	0	0	0	5.12984e-05	7.36233e-05	0.000130013	8.47886e-05
ENSMUSG00000003848	0	0	0	2.9905e-05	6.44363e-05	0.000130005	8.3331e-05
ENSMUSG00000003849	0	0	7.25861e-05	0	3.39011e-05	1.51819e-05	1.86909e-05
ENSMUSG00000003863	0.00614779	9.73449e-05	0.000450306	0.000252847	0.000403167	7.37943e-05	0.000318757
ENSMUSG00000003865	0	1.29771e-05	9.11463e-07	6.0913e-05	5.82607e-05	0.00012716	7.88158e-05
ENSMUSG00000003868	0	0	0	0	3.43989e-05	3.11952e-05	4.80555e-05
ENSMUSG00000003872	0.00285025	0.00459644	0.00157514	0.00599161	0.00700978	0.00274992	0.00463947
ENSMUSG00000003873	0	0	0	0	0	0	0
ENSMUSG00000003882	0.00233564	0.000288764	0.000553217	0.000207853	0.000683134	0.000105661	0.000488586
ENSMUSG00000003923	0	0	0	6.72678e-05	0.000150592	5.97928e-05	0.000263415
ENSMUSG00000003929	0.000163571	0.000387387	0.000254769	0.00100633	0.00355658	0.00229333	0.00428233
ENSMUSG00000003934	0.000214231	0.000152511	0.00263416	0.000197751	0.00182285	0.000319437	0.00233704
ENSMUSG00000003948	0.000176649	7.68795e-05	3.38231e-05	0.000199933	0.00156896	0.000715741	0.00273149
ENSMUSG00000003949	0.0133069	0.00446766	0.0170325	0.00404624	0.013301	0.00357339	0.0108995
ENSMUSG00000003955	0	0	0	0	0	0	0
ENSMUSG00000003970	0	0	0	0	0	0	0
ENSMUSG00000003974	1	0.00756194	0.0730038	0.011371	0.0458017	0.0141203	0.0476756
ENSMUSG00000003992	4.56586e-06	8.9237e-05	6.93321e-05	0.000302846	0.00210674	0.00092706	0.00268521
ENSMUSG00000004018	8.01262e-05	8.38217e-05	7.34171e-05	0.000103607	0.000136734	7.03307e-05	0.000230149
ENSMUSG00000004031	0.000744303	5.7922e-05	5.76635e-05	0.000104059	0.000213246	7.5106e-05	0.000339509
ENSMUSG00000004032	0	0	6.85724e-05	5.90689e-05	0.00322509	5.89647e-05	0.00350554
ENSMUSG00000004035	0.000738613	2.64183e-05	0.00298446	8.71763e-05	0.0275718	6.71146e-05	0.0312114
ENSMUSG00000004038	0.000165407	0	0.000406869	0	0.000690023	1.20097e-06	0.000454318
ENSMUSG00000004040	0	0	0	0	0	0	0
ENSMUSG00000004043	5.85232e-06	0	0	0	0	0	0
ENSMUSG00000004044	0	6.55166e-07	3.76756e-06	3.51803e-05	5.26412e-05	0.000123604	8.20412e-05
ENSMUSG00000004054	4.58863e-07	1.69675e-06	7.14373e-07	6.00319e-05	7.98851e-05	0.000127174	8.62514e-05
ENSMUSG00000004056	0	1.8899e-06	0	5.36418e-05	7.64054e-05	0.000129943	8.4058e-05
ENSMUSG00000004069	0	0	0	0	3.60547e-05	5.01826e-05	4.13909e-05
ENSMUSG00000004070	0	0	0	0	3.51902e-05	1.73296e-05	3.08481e-05
ENSMUSG00000004071	0	0	0	2.80705e-05	4.67248e-05	0.000121877	7.03729e-05
ENSMUSG00000004085	0	6.87168e-05	0	0.000102023	0.000254832	8.98327e-05	0.000373728
ENSMUSG00000004096	0	0	0	0	0	0	0
ENSMUSG00000004098	0.000538596	0	0.000503258	1.44318e-06	0.000317909	0.000103023	0.000246535
ENSMUSG00000004099	0	0	0	0	2.58622e-05	4.44079e-05	3.39918e-05
ENSMUSG00000004100	0	1.46822e-06	0	5.56839e-05	7.48266e-05	9.98415e-05	0.000114853
ENSMUSG00000004105	0	0	0	5.07189e-05	3.88465e-05	0.000103587	8.21061e-05
ENSMUSG00000004110	0.000917978	0.000510924	0.00161314	0.000463033	0.00141427	0.000922687	0.00159308
ENSMUSG00000004113	0.00213441	0	6.91966e-05	0	1.58292e-05	3.90232e-06	5.34596e-06
ENSMUSG00000004127	0.000156886	8.25365e-05	0.000262229	0.000115648	0.000349979	0.0001438	0.000374417
ENSMUSG00000004151	0.000202106	0.000156096	0.000228109	0.000236947	0.00220149	0.000779753	0.00157348
ENSMUSG00000004187	0.000171751	0.000211694	6.92689e-05	0.000183215	0.00036961	6.30417e-05	0.000314589
ENSMUSG00000004207	0	0	0	0	0	0	0
ENSMUSG00000004221	4.1503e-06	6.14634e-05	5.84271e-05	9.71543e-05	0.000106942	6.15964e-05	0.000140471
ENSMUSG00000004231	0.158036	0.00109214	0.0147684	0.00181404	0.0253518	0.00205993	0.0201246
ENSMUSG00000004233	5.7014e-05	7.71765e-05	0.000113544	0.000142849	0.000330035	0.000114439	0.000348304
ENSMUSG00000004263	0	0	0	7.06529e-06	3.68477e-05	6.66165e-05	5.36218e-05
ENSMUSG00000004264	0	0	0	0	0	0	0
ENSMUSG00000004266	0	0	0	0	6.42203e-06	0	0
ENSMUSG00000004267	0.00019585	0	6.93433e-05	0	3.48637e-06	0	0
ENSMUSG00000004268	0	0	0	0	2.56642e-05	1.28908e-06	2.59415e-05
ENSMUSG00000004270	0	0	0	0	3.61971e-05	1.98437e-05	4.82174e-05
ENSMUSG00000004285	0	0	0	0	0	0	0
ENSMUSG00000004296	0.00302738	9.76299e-05	0.00614491	0.000100496	0.00521884	0.000122812	0.00472713
ENSMUSG00000004317	2.83831e-05	0.000101917	0.000386149	0.000102663	0.000235875	6.7542e-05	0.000245261
ENSMUSG00000004319	3.02915e-05	0	8.81918e-07	0	3.23908e-05	1.66201e-05	1.67845e-05
ENSMUSG00000004328	0.00268074	0.00362274	0.00961172	0.00556704	0.00628393	0.00227211	0.00544321
ENSMUSG00000004341	0.000378952	0	0.00126957	0	0.000238475	0.00012171	0.000196829
ENSMUSG00000004344	0.179155	0.00402312	0.0141509	0.00266595	0.232373	0.0123566	0.206898
ENSMUSG00000004347	0.000343286	2.90944e-07	6.92473e-05	3.05644e-05	4.27779e-05	0.000129802	7.16743e-05
ENSMUSG00000004356	1.37471e-05	6.35282e-05	6.05857e-05	0.000102281	0.000331709	0.000210615	0.000440186
ENSMUSG00000004359	1.57479e-05	0	2.9103e-05	3.36298e-07	5.58016e-05	0.000104412	7.97106e-05
ENSMUSG00000004360	0.00289509	0.00516818	0.00348254	0.00580273	0.0177777	0.00977615	0.0192826
ENSMUSG00000004364	0	0	0	0	5.82308e-06	0	7.81664e-07
ENSMUSG00000004366	0.00192951	0	1.67968e-06	0	0.0285765	1.21791e-06	0.0213705
ENSMUSG00000004371	0.000779213	0.00180963	0.00193777	0.00214906	0.00367479	0.00248846	0.00336357
ENSMUSG00000004383	1.88844e-05	8.96035e-05	5.60141e-05	0.000104014	0.000148097	5.83241e-05	0.000221646
ENSMUSG00000004393	0	0	0	4.19777e-06	5.27599e-05	0.000121649	8.14423e-05
ENSMUSG00000004394	0	0	0	0	7.74677e-06	0	1.80053e-06
ENSMUSG00000004415	0.000709671	0.000347146	0.00154936	0.001357	0.0218071	0.00284356	0.0330073
ENSMUSG00000004446	7.72078e-05	0.00010478	8.43544e-05	0.000102316	0.000372963	6.15657e-05	0.000404797
ENSMUSG00000004451	0	0	0	0	2.22071e-05	0	1.39681e-05
ENSMUSG00000004455	0	0	0	0	8.87008e-06	0	7.07862e-06
ENSMUSG00000004460	0	0	0	0	5.60369e-06	0	7.33913e-07
ENSMUSG00000004462	1.58226e-05	0.000102198	6.87475e-05	0.000101916	0.00026694	6.16476e-05	0.000281122
ENSMUSG00000004473	0	0.00195417	0.000613732	0.0035142	0.0180826	0.0090058	0.017662
ENSMUSG00000004500	0.000177675	0.000289964	0.000242491	0.000375232	0.00139591	0.000852479	0.00166734
ENSMUSG00000004508	0.000170133	0.000111472	0.000223306	0.000134568	0.000244446	6.45597e-05	0.000223272
ENSMUSG00000004530	0	4.78291e-07	3.27273e-06	5.82276e-05	0.000103375	0.000123141	0.000159412
ENSMUSG00000004535	0	0	0	0	0	0	0
ENSMUSG00000004540	0.0466376	0.000244872	0.0132342	0.000180416	0.030755	0.000706982	0.0277321
ENSMUSG00000004542	0.0318633	0.00133769	0.0442278	0.000908372	0.0805907	0.00232875	0.0679104
ENSMUSG00000004552	0.000797357	7.67136e-05	0.0165594	0.000123781	0.000918881	8.17227e-05	0.00122358
ENSMUSG00000004558	0.000156534	0	5.60505e-05	1.94181e-05	0.000103232	0.000122089	8.68797e-05
ENSMUSG00000004561	1.62065e-06	7.4807e-05	2.14709e-06	6.88971e-05	8.16908e-05	7.54937e-05	9.05809e-05
ENSMUSG00000004562	0	0	0	0	8.81627e-06	0	2.04208e-06
ENSMUSG00000004565	1.01387e-06	3.76181e-06	0	5.21906e-05	6.70438e-05	0.000121587	8.32039e-05
ENSMUSG00000004567	6.65412e-07	5.30942e-05	5.14782e-07	6.6722e-05	9.38959e-05	9.72827e-05	9.59121e-05
ENSMUSG00000004568	0	5.17708e-06	0	5.76685e-05	6.67106e-05	0.000128829	8.3205e-05
ENSMUSG00000004591	0	0	0	2.77705e-05	7.27407e-05	0.000128474	8.3375e-05
ENSMUSG00000004609	0.00791995	0.00262908	0.00185827	0.0017912	0.0443093	0.00284545	0.0332399
ENSMUSG00000004610	0	0	0	0	2.08073e-05	0	7.87615e-06
ENSMUSG00000004612	0.00316219	0.00236017	0.015393	0.00137094	0.0395934	0.00310036	0.112469
ENSMUSG00000004613	1	0.044327	1	0.0174355	1	0.0405652	1
ENSMUSG00000004626	0	0	0	0	1.33216e-06	0	0
ENSMUSG00000004630	0.000634679	8.85985e-05	0.00102598	0.000118415	0.00503636	0.000155147	0.00448573
ENSMUSG00000004631	5.35266e-07	0.00163453	0.000198592	0.00628374	0.0169475	0.0190617	0.0205375
ENSMUSG00000004633	0.00364411	0.000447284	3.97217e-05	0.000628394	0.0055523	0.00103895	0.00425655
ENSMUSG00000004637	0.000180092	0.000415521	0.000474681	0.000983129	0.00255358	0.00135621	0.00278266
ENSMUSG00000004642	0	0	0	0	4.35694e-05	0.000119551	7.95187e-05
ENSMUSG00000004651	0.000382571	0.00103041	0.00101656	0.00166764	0.00240613	0.00149905	0.00237722
ENSMUSG00000004654	0.00899792	9.13004e-05	0.00577742	9.99041e-05	0.0028143	0.000233849	0.00231247
ENSMUSG00000004655	0.000149205	3.17044e-07	0.00128338	7.57681e-06	0.00883088	0.000129453	0.00719021
ENSMUSG00000004661	0.000162844	9.89381e-05	0.000149792	0.000107914	0.000217936	6.79414e-05	0.000259232
ENSMUSG00000004665	0	0	0	9.74512e-07	3.41686e-05	0.000107306	4.98913e-05
ENSMUSG00000004667	0	0	0	0	4.29178e-06	0	1.12963e-06
ENSMUSG00000004668	0.0154838	7.75389e-05	0.000178778	0.000100424	0.00288635	0.000107739	0.00215221
ENSMUSG00000004677	0	0	0	1.38857e-05	3.93729e-05	0.000105088	6.46638e-05
ENSMUSG00000004698	0.00742054	0.000103931	0.000398173	9.4175e-05	5.5351e-05	8.04209e-05	7.70172e-05
ENSMUSG00000004707	0.000243695	1.27308e-06	0.0013636	2.57521e-05	9.28291e-06	6.25678e-05	4.20839e-06
ENSMUSG00000004709	0.0138565	0.0013116	0.0163995	0.0016625	0.00737968	0.0032496	0.0111495
ENSMUSG00000004730	0.00792606	4.1559e-05	0.00675862	5.80245e-05	0.0143721	6.36624e-05	0.0148794
ENSMUSG00000004748	0.000134821	0.00165489	0.00135024	0.000769153	0.00233694	0.000943667	0.00299349
ENSMUSG00000004768	7.40448e-05	8.1287e-05	9.24122e-05	0.000218092	0.000942677	0.000709314	0.00135468
ENSMUSG00000004771	0	0	0	0	1.741e-05	0	2.70666e-06
ENSMUSG00000004788	0	0	0	0	3.38896e-05	1.8763e-06	3.16579e-05
ENSMUSG00000004789	0	0	0	0	2.62124e-06	0	0
ENSMUSG00000004791	0.00218158	9.74359e-05	0	0.000156404	0.000719174	0.000498767	0.0037428
ENSMUSG00000004798	0	1.2875e-05	3.14143e-06	6.00131e-05	0.000117564	7.38788e-05	0.000151684
ENSMUSG00000004814	0.0103558	0.000923363	0.0181632	0.000794001	0.022578	0.0023347	0.04623
ENSMUSG00000004815	8.79816e-06	8.04246e-05	3.34013e-05	0.000121988	0.000378958	7.17869e-05	0.000375999
ENSMUSG00000004821	1	0.0154308	1	0.0183684	1	1	1
ENSMUSG00000004837	0.000160397	0	6.93309e-05	0	0	0	0
ENSMUSG00000004842	0.00348196	0.000441359	0.00782245	0.00126949	0.0153538	0.0019526	0.0173689
ENSMUSG00000004843	0	0	0	0	3.7069e-05	2.74178e-06	4.92629e-05
ENSMUSG00000004846	0	0	0	3.52958e-05	5.71379e-05	0.000121763	8.28602e-05
ENSMUSG00000004849	0	0	0	0	3.61905e-05	2.43771e-06	4.455e-05
ENSMUSG00000004864	2.27248e-05	0	0	0	0	0	1.06294e-05
ENSMUSG00000004865	0	0	0	0	4.31067e-05	0.00012112	7.77753e-05
ENSMUSG00000004872	0.0148564	0.00120327	0.00251715	0.00192126	0.0233112	0.00308227	0.0228222
ENSMUSG00000004880	0	5.19907e-07	1.49059e-05	6.31768e-05	0.000153902	6.29182e-05	0.000277265
ENSMUSG00000004885	0	0	1.53011e-05	7.36943e-06	0.000307234	0.00011876	0.000232778
ENSMUSG00000004891	0	7.70836e-05	0.0010563	0.000248793	0.00379214	0.000541738	0.00369972
ENSMUSG00000004892	0.0134105	0.000105204	0.0506021	0.000197334	0.0331537	0.000401676	0.0227771
ENSMUSG00000004894	0.0172741	0.00028392	0.0338249	0.000610299	0.0122017	0.000665492	0.00965511
ENSMUSG00000004895	0	0	0	2.08989e-06	4.22061e-05	9.02714e-05	7.13492e-05
ENSMUSG00000004896	0	1.97264e-06	0	3.91895e-05	7.80409e-05	0.000127341	8.59634e-05
ENSMUSG00000004897	0	0	0	0	0	0	0
ENSMUSG00000004902	0.00756146	0.00131974	0.00171787	0.00175773	0.0255539	0.00231449	0.0246842
ENSMUSG00000004929	0	0	9.83332e-07	4.55608e-05	7.54006e-05	0.000129215	0.000101227
ENSMUSG00000004931	0	2.39839e-05	5.52982e-07	6.61807e-05	7.77379e-05	0.000130004	8.31967e-05
ENSMUSG00000004933	0.0007499	8.87309e-05	8.93744e-07	0.000361983	0.00107968	0.000132983	0.000475025
ENSMUSG00000004934	0	1.52636e-06	1.30988e-05	5.3603e-05	6.17889e-05	0.000121648	8.25047e-05
ENSMUSG00000004936	0	0	0	0	1.44412e-06	0	0
ENSMUSG00000004937	0	0	0	0	1.91148e-05	0	7.98768e-06
ENSMUSG00000004939	0.00205719	0.0022466	0.00331184	0.00297294	0.00457872	0.00256851	0.00479145
ENSMUSG00000004945	0	0	0	0	3.07564e-05	2.75228e-06	2.02582e-05
ENSMUSG00000004947	1.17817e-05	0	3.81991e-05	0	1.34349e-05	6.2146e-07	2.56741e-06
ENSMUSG00000004948	0.00482694	1.37318e-05	0.0141997	7.12273e-05	0.0613713	5.82586e-05	0.0531922
ENSMUSG00000004951	0.000146715	0	0	0	4.2008e-06	0	0
ENSMUSG00000004952	0.000208422	7.76111e-05	0.000236962	9.98252e-05	0.00011219	5.8324e-05	0.000111204
ENSMUSG00000004961	0.0231856	0.00040134	9.85906e-05	0.00150981	0.00792591	0.00225859	0.00614673
ENSMUSG00000004980	0	0	0	0	0	0	0
ENSMUSG00000004988	0.00193133	0.000373377	0.0048289	0.00139825	0.0186324	0.00207658	0.0117023
ENSMUSG00000004994	4.73908e-05	9.04748e-05	6.8201e-05	7.21087e-05	7.42451e-05	8.17491e-05	8.32237e-05
ENSMUSG00000004996	1.52349e-06	9.95818e-05	6.93955e-05	0.000105068	0.000233937	7.70753e-05	0.000304118
ENSMUSG00000005034	0	8.76224e-06	0	6.9622e-05	0.00016997	5.83287e-05	0.000243633
ENSMUSG00000005043	0.000166498	7.77025e-05	7.33574e-05	0.000108972	0.000489649	7.4017e-05	0.000517529
ENSMUSG00000005045	0.0140349	0.00381585	0.00429392	0.00186398	0.025055	0.00251467	0.0190947
ENSMUSG00000005054	0	0	0	0	0	0	0
ENSMUSG00000005057	0.00131186	0.000257902	6.94983e-05	0.000634799	0.00262753	0.00128884	0.00387405
ENSMUSG00000005069	0	4.8969e-06	6.21049e-07	6.0887e-05	9.68077e-05	0.000109116	0.000119494
ENSMUSG00000005078	0	1.68727e-06	5.25575e-06	4.45108e-05	7.91395e-05	0.000129882	8.3312e-05
ENSMUSG00000005087	0	0	0	0	5.0376e-05	4.35985e-05	7.9242e-05
ENSMUSG00000005089	0.0244537	0.000334928	0.00531794	0.000286663	0.00135367	0.000463293	0.000722558
ENSMUSG00000005102	6.44962e-05	0.00010521	6.59393e-05	0.00023086	0.000935403	0.000691457	0.00115901
ENSMUSG00000005103	0	0	0	0	0	0	0
ENSMUSG00000005107	3.18701e-06	0.000113466	0.00022072	0.000229258	0.0010247	0.000135404	0.000948639
ENSMUSG00000005124	0.012386	0.000596359	0.00152533	0.00123982	0.00509504	0.00236181	0.00559878
ENSMUSG00000005125	0.000180243	5.19377e-07	4.97952e-06	2.86678e-05	0.000171625	0.00012171	0.000156006
ENSMUSG00000005131	9.58506e-06	8.01954e-05	5.1951e-05	0.000191721	0.00078684	0.0011607	0.00148406
ENSMUSG00000005142	0	0	0	6.06113e-06	5.3686e-05	9.69917e-05	7.68133e-05
ENSMUSG00000005148	0.000124292	4.13818e-06	0	6.15024e-05	0.000339531	0.000121554	0.000274692
ENSMUSG00000005150	0	0	0	1.07398e-05	5.27102e-05	0.000119183	7.70285e-05
ENSMUSG00000005161	0	0	0	0	0	0	0
ENSMUSG00000005198	0	0	0	0	2.67846e-05	0	2.25622e-05
ENSMUSG00000005202	0.0711514	0.00261345	1	0.00502472	0.201583	0.00964126	0.237033
ENSMUSG00000005204	0	0	0	0	3.53189e-05	8.14772e-06	3.94674e-05
ENSMUSG00000005220	0.0343902	0.0035233	0.0459238	0.00260006	0.0113594	0.0074517	0.0125668
ENSMUSG00000005225	0.000162565	8.72168e-05	0.000225904	0.000103511	0.000382931	7.74113e-05	0.000358616
ENSMUSG00000005232	1	0.00589328	0.0528543	0.00496214	0.0176153	0.00502431	0.0126121
ENSMUSG00000005233	0	0	0.000176589	3.15422e-06	6.17167e-05	0.000108513	8.32045e-05
ENSMUSG00000005237	0.00177213	0.000201337	0.0014956	0.000231746	0.00374758	0.000486438	0.00412128
ENSMUSG00000005251	0	4.46312e-07	0	5.68317e-05	5.7034e-05	0.000121807	8.09101e-05
ENSMUSG00000005262	0	0	0	0	3.65391e-05	5.35116e-05	4.82219e-05
ENSMUSG00000005267	0.000338033	0.00208367	0.000739722	0.00336399	0.0044847	0.00322893	0.00478752
ENSMUSG00000005268	0.00174936	0.000186253	0.000457265	0.000407872	0.000716324	0.000751595	0.000583223
ENSMUSG00000005299	0	0	0	8.91796e-06	5.40973e-05	0.000120404	7.97084e-05
ENSMUSG00000005312	0	0	0	0	0	0	0
ENSMUSG00000005320	0.0859776	0.000981308	0.000194188	0.00164659	0.0218645	0.00362165	0.0238341
ENSMUSG00000005338	0.0422243	6.83733e-05	7.28454e-05	7.15151e-05	0.000229197	6.22997e-05	0.000285072
ENSMUSG00000005339	0.0514907	0.000104157	0.00950731	0.000248383	0.0246827	0.000527766	0.0265735
ENSMUSG00000005354	0	1.84208e-06	1.20582e-06	4.78757e-05	7.17231e-05	0.000128413	8.41105e-05
ENSMUSG00000005355	0.00224161	8.43397e-05	0.000528603	0.000156572	0.0164461	0.000336291	0.0161556
ENSMUSG00000005357	0.00176209	0.00295886	0.134164	0.00681756	0.287105	0.0122031	0.295771
ENSMUSG00000005360	0	0	0	0	0	0	0
ENSMUSG00000005362	0	0	0	8.05834e-07	5.98863e-05	0.000121777	8.23346e-05
ENSMUSG00000005364	0.000139804	3.5797e-05	6.25381e-05	4.86741e-05	0.000138545	0.000121003	0.000269939
ENSMUSG00000005370	0	3.15164e-06	1.51209e-06	7.06832e-05	0.000113847	5.81732e-05	0.000239524
ENSMUSG00000005371	0	0	0	0	3.89086e-05	0.000101629	6.37412e-05
ENSMUSG00000005373	0.000170933	0.00010792	0.000453262	0.000102178	0.000994448	6.12585e-05	0.000493113
ENSMUSG00000005374	3.82251e-05	0.000104919	0.000130874	9.98497e-05	0.000220735	6.8388e-05	0.000294643
ENSMUSG00000005378	0	0	0	6.72577e-07	4.11867e-05	0.000108921	7.08925e-05
ENSMUSG00000005397	3.47486e-06	4.28339e-06	0.00266259	2.62364e-05	0.0103923	6.49558e-05	0.00709297
ENSMUSG00000005410	0	0	0	1.4712e-05	5.40661e-05	7.46157e-05	0.000112231
ENSMUSG00000005413	0	0	0	0	2.7165e-05	0	7.48187e-06
ENSMUSG00000005417	0	0	0	0	3.51163e-05	1.12426e-05	3.77766e-05
ENSMUSG00000005442	0	0	0	2.10124e-05	4.16173e-05	0.000120749	7.1411e-05
ENSMUSG00000005447	0	0	0	0	2.95003e-05	6.88925e-06	1.96959e-05
ENSMUSG00000005465	0.000334082	9.31434e-05	0.00164687	0.000103424	0.000355255	8.35164e-05	0.000332961
ENSMUSG00000005469	0	0	0	3.68476e-07	3.62265e-05	3.92807e-05	5.31376e-05
ENSMUSG00000005470	0.000178818	7.70028e-05	0.000440631	0.00012925	0.000397087	0.000602564	0.00048114
ENSMUSG00000005474	0.000198957	9.16344e-05	0.00462639	0.000100012	0.0117107	0.000204582	0.0140803
ENSMUSG00000005481	6.17483e-07	0	4.06467e-06	5.56167e-06	5.72492e-05	0.000121673	8.30041e-05
ENSMUSG00000005483	0	0	0	0	1.34694e-06	0	1.12321e-06
ENSMUSG00000005493	0.000178951	2.03554e-05	0.000167795	5.96755e-05	0.000231999	6.88435e-05	0.000277717
ENSMUSG00000005501	0	6.71801e-05	2.38832e-05	9.65626e-05	0.000238747	6.3045e-05	0.000320049
ENSMUSG00000005503	1	0.152003	1	0.170908	0.394438	0.189942	0.387757
ENSMUSG00000005505	7.11201e-06	0.000104964	6.93882e-05	0.000100125	0.000216588	6.49531e-05	0.000278779
ENSMUSG00000005506	0	0	0	1.34562e-05	5.36005e-05	0.000121549	8.04517e-05
ENSMUSG00000005510	0	0	0	0	1.5419e-06	0	0
ENSMUSG00000005514	0	0	0	1.27577e-06	5.29263e-05	2.94555e-05	6.86375e-05
ENSMUSG00000005533	0	0	0	5.51755e-05	6.53902e-05	0.000127404	8.33064e-05
ENSMUSG00000005534	1.31365e-05	0	1.10162e-05	0	3.58564e-05	4.51934e-05	3.67014e-05
ENSMUSG00000005540	0.00240655	0	0	0	3.6962e-05	0	5.12467e-05
ENSMUSG00000005547	0.000167663	0	0	0	0	0	0
ENSMUSG00000005553	0.00247845	0	0.000237641	6.78197e-07	7.57822e-05	4.78253e-06	8.29648e-05
ENSMUSG00000005566	0	0	0	0	0	0	0
ENSMUSG00000005575	0	0	0	0	1.15643e-06	0	0
ENSMUSG00000005580	0.000123683	0.000204031	6.76426e-05	0.000220372	0.000327715	0.000167776	0.000332003
ENSMUSG00000005583	0.00100233	0.00288796	0.000886354	0.00416952	0.0381221	0.00937774	0.0448269
ENSMUSG00000005609	0	0	0	3.41066e-06	4.41049e-05	0.000121507	7.35976e-05
ENSMUSG00000005610	0	0	0	0	0	0	0
ENSMUSG00000005611	0.00112057	0.000236657	4.18107e-05	0.000281169	0.00491901	0.00100118	0.0159889
ENSMUSG00000005615	0	8.09618e-07	5.96699e-05	3.73362e-05	0.000101491	0.000126477	0.000103857
ENSMUSG00000005621	9.31401e-06	0.000103614	6.87392e-05	0.000105171	0.000194165	6.51202e-05	0.000247998
ENSMUSG00000005625	0	0	0	0	0	0	0
ENSMUSG00000005628	0.000125378	0.00152201	0.00198147	0.00191219	0.00389161	0.00166036	0.00358428
ENSMUSG00000005640	0.012401	0.000288291	6.44432e-05	0.000387408	0.00167027	0.000950915	0.00275891
ENSMUSG00000005649	0.00993432	0.00477486	0.0496651	0.00761646	0.0364883	0.00945047	0.0575559
ENSMUSG00000005656	0	0	0	0	3.40934e-05	3.83101e-06	3.39176e-05
ENSMUSG00000005667	0.000175982	1.9179e-05	6.93357e-05	2.42498e-05	6.98167e-05	0.00013001	8.3759e-05
ENSMUSG00000005672	0.000128912	0	0	0	8.58512e-06	2.0368e-06	1.95029e-06
ENSMUSG00000005674	2.31707e-06	5.68311e-05	2.58585e-05	8.23324e-05	0.000143076	5.84309e-05	0.000217656
ENSMUSG00000005677	0.000757408	0.000700204	0.00131945	0.000847879	0.00331869	0.00165742	0.00331607
ENSMUSG00000005681	0.000492925	0	0.000801485	0	8.65065e-05	0	8.334e-05
ENSMUSG00000005682	0	0	0	8.56245e-06	3.99161e-05	0.000115189	6.341e-05
ENSMUSG00000005683	0	0	0	0	0	0	0
ENSMUSG00000005686	0.000172201	9.73552e-05	2.70007e-06	0.000189366	0.000531207	0.000569554	0.00114874
ENSMUSG00000005687	0	0	0	0	2.87091e-05	2.51593e-06	2.68478e-05
ENSMUSG00000005696	1.17653e-05	0.00263594	0.00235513	0.00150824	0.00743007	0.0125453	0.0072909
ENSMUSG00000005698	0	0	0	0	4.03544e-05	9.92343e-05	6.89019e-05
ENSMUSG00000005699	0.000112246	0.000105376	0.000219148	0.000172661	0.000352356	0.000141867	0.000348378
ENSMUSG00000005705	0.00162288	7.85151e-05	0.0017712	0.000123031	0.00594609	0.000394901	0.00838025
ENSMUSG00000005716	0.0075916	0	1.06048e-05	3.06539e-06	7.39114e-05	0.000119377	8.61337e-05
ENSMUSG00000005718	9.29576e-05	0.000133572	6.95636e-05	0.00030475	0.00065472	0.00109622	0.00175034
ENSMUSG00000005732	0	0	0	0	6.51701e-07	0	1.30879e-06
ENSMUSG00000005763	1.00887e-05	8.42656e-05	0.000156696	0.000118658	0.000455315	0.00010355	0.00044602
ENSMUSG00000005774	0	0	1.11394e-05	6.6408e-07	3.58352e-05	7.54628e-05	3.89486e-05
ENSMUSG00000005779	0	0	0	0	0	0	0
ENSMUSG00000005800	0.00489138	0.00133235	0.0118968	0.00133026	0.0913914	0.00326822	0.0728203
ENSMUSG00000005802	0	9.02858e-05	5.84109e-05	0.000103674	0.0007514	9.36521e-05	0.000789962
ENSMUSG00000005803	0.00036419	9.64363e-05	6.9386e-05	0.000104289	0.000361828	5.85256e-05	0.000301597
ENSMUSG00000005804	0	0.000104773	5.51673e-05	0.000102735	0.000198467	6.01527e-05	0.000223724
ENSMUSG00000005813	0	0	0	0	3.90422e-05	6.38711e-05	5.8311e-05
ENSMUSG00000005823	0	0	0	0	2.49026e-05	0	8.91218e-06
ENSMUSG00000005824	0.0110031	0.00119714	0.00605915	0.000732798	0.0198591	0.00196609	0.00989361
ENSMUSG00000005836	0.0531711	0.00392604	0.00646694	0.0104661	0.0255728	0.0121888	0.0275458
ENSMUSG00000005846	0	0	0	0	3.66324e-05	9.28277e-05	6.60561e-05
ENSMUSG00000005864	0.00357614	0.000105037	0.000605453	7.01901e-05	0.000229645	6.93399e-05	0.000266376
ENSMUSG00000005871	0	2.11972e-05	6.91292e-06	8.04395e-05	0.000118214	5.86537e-05	0.000172437
ENSMUSG00000005873	0	0	0	0	2.0106e-05	0	9.36232e-06
ENSMUSG00000005881	0	0	0	0	0	0	0
ENSMUSG00000005882	0	3.01561e-06	4.36151e-06	4.88998e-05	7.64967e-05	0.000123226	9.11847e-05
ENSMUSG00000005883	0.000137656	8.9618e-05	0.000250579	0.000143271	0.000279622	0.000129419	0.00028414
ENSMUSG00000005886	0	0	1.18045e-06	5.18752e-06	3.49452e-05	5.8355e-05	3.37899e-05
ENSMUSG00000005891	1	0.00506454	1	0.00644788	1	0.0142756	1
ENSMUSG00000005892	0.0377366	4.34327e-05	0.0193536	6.64532e-05	1	6.4659e-05	1
ENSMUSG00000005893	0	1.12077e-06	6.41628e-07	5.83247e-05	7.85209e-05	9.80447e-05	8.80405e-05
ENSMUSG00000005897	1.10409e-05	7.78358e-05	8.85061e-05	0.00016276	0.000420318	0.00016114	0.00038497
ENSMUSG00000005899	4.48561e-07	5.57599e-05	1.12565e-05	9.62622e-05	0.000184995	6.48748e-05	0.000293133
ENSMUSG00000005907	3.39022e-05	8.20925e-05	8.80671e-05	0.000117708	0.000267895	0.00013181	0.000298223
ENSMUSG00000005917	0.022371	0.0422924	0.0324897	0.0381946	0.0414355	0.0330608	0.0366846
ENSMUSG00000005936	0	0	0	1.45612e-05	5.96793e-05	0.000121967	8.17687e-05
ENSMUSG00000005947	0.00305155	0.000303552	0.00138047	0.000561051	0.0294449	0.00219656	0.0283225
ENSMUSG00000005949	9.31472e-06	8.80249e-05	5.26538e-05	0.000111079	0.000388978	6.78917e-05	0.000359018
ENSMUSG00000005950	0.0020634	0.000105216	0.000221141	0.000101635	0.000404698	6.52926e-05	0.000362324
ENSMUSG00000005951	0.000170296	0.0002783	0.000229338	0.000306785	0.00140563	0.000573624	0.00106443
ENSMUSG00000005952	0.01806	0.00726385	0.0191506	0.00696067	0.125692	0.0149302	0.113676
ENSMUSG00000005958	0.000181066	6.95622e-06	1.28677e-06	6.65917e-05	6.84489e-05	0.000124324	8.31971e-05
ENSMUSG00000005968	0	1.18203e-05	1.09629e-05	6.13208e-05	0.00011848	0.000121027	0.00012064
ENSMUSG00000005973	0	0	0	1.47938e-06	6.45907e-05	0.00012269	9.77006e-05
ENSMUSG00000005980	0.000128714	9.01066e-05	0.000280282	0.000202952	0.00166872	0.000291775	0.00187409
ENSMUSG00000005981	0	0	0	0	7.68442e-06	0	4.10537e-06
ENSMUSG00000005982	0	1.54551e-05	1.23754e-05	5.45065e-05	7.53621e-05	0.000115309	8.36201e-05
ENSMUSG00000005983	0.000113067	8.27106e-05	6.98072e-05	9.98679e-05	0.000274377	6.44678e-05	0.000304433
ENSMUSG00000005986	0.000124102	0.000404323	0.000222089	0.000484972	0.00233672	0.000608475	0.00275213
ENSMUSG00000005994	0.0314424	0.00257087	0.311956	0.00298144	1	0.0053874	1
ENSMUSG00000006005	0	0	0	0	1.19421e-05	0	5.99283e-06
ENSMUSG00000006007	0.0617677	0.00314687	1	0.00219487	0.182048	0.00835632	0.220649
ENSMUSG00000006010	0	1.81881e-06	7.07173e-06	3.75502e-05	7.02644e-05	0.000129961	8.32093e-05
ENSMUSG00000006014	0.000155324	0	0.000478083	0	0.000678115	6.80507e-06	0.000604173
ENSMUSG00000006019	2.00664e-05	8.84283e-05	5.43629e-05	0.000102827	0.000154373	5.85353e-05	0.000199999
ENSMUSG00000006021	2.42247e-06	2.38046e-05	5.404e-06	5.52699e-05	6.73935e-05	0.000130001	8.30996e-05
ENSMUSG00000006024	0	0	0	0	0	0	0
ENSMUSG00000006050	0	0	0	2.38238e-06	5.47785e-05	0.000114955	7.63321e-05
ENSMUSG00000006056	0.00592457	0.000102499	0.00305201	0.000190341	0.0218409	0.00133907	0.0229818
ENSMUSG00000006057	0	0	5.91833e-07	4.06872e-06	5.71548e-05	0.000120869	8.04673e-05
ENSMUSG00000006058	0	0	0	0	1.96727e-06	0	0
ENSMUSG00000006095	0	0	0	0	1.34457e-06	0	0
ENSMUSG00000006127	0	0	0	2.3009e-05	5.43738e-05	0.000121964	7.94455e-05
ENSMUSG00000006134	0	1.16826e-05	1.02168e-05	7.30388e-05	0.000112004	6.28852e-05	0.000154111
ENSMUSG00000006143	0.000653862	9.57873e-05	0.00085938	0.000172639	0.0038902	0.000550329	0.00623384
ENSMUSG00000006154	0.000184483	0.000360087	6.93452e-05	0.00118487	0.00586049	0.00114226	0.00459579
ENSMUSG00000006169	0	0	0	0	0	0	0
ENSMUSG00000006179	0	0	0	0	4.20231e-05	0.000121641	6.88981e-05
ENSMUSG00000006191	9.26862e-05	6.43853e-05	2.98494e-05	6.37509e-05	8.53437e-05	7.85622e-05	9.22065e-05
ENSMUSG00000006200	0.0277485	0.000573978	0.0565232	0.000595577	0.0268865	0.00176158	0.124832
ENSMUSG00000006204	0.0394641	0.000149272	0.31822	0.000184366	0.0927003	0.000479216	0.159188
ENSMUSG00000006205	6.98073e-05	0	0	0	3.16608e-05	1.69923e-05	4.08935e-05
ENSMUSG00000006215	0	0	0	6.47869e-06	3.72968e-05	9.70153e-05	5.52653e-05
ENSMUSG00000006216	0.0307342	0.000292831	0.00696536	0.000497073	0.0114996	0.000870282	0.0145511
ENSMUSG00000006218	1	0.000283029	0.0113373	0.000248561	0.00628446	0.000959052	0.00644865
ENSMUSG00000006219	0.000136759	8.87854e-05	6.36409e-05	0.000128309	0.000442556	6.83987e-05	0.000362396
ENSMUSG00000006221	0.00539899	0.000848322	0.00410791	0.00126837	0.00977925	0.00149193	0.00959496
ENSMUSG00000006235	0.0152228	0.000779062	0.01967	0.00365948	0.0351382	0.00494527	0.0227307
ENSMUSG00000006241	0.000151917	0.000281869	9.96395e-05	0.000213642	0.000151038	0.000104321	0.000189312
ENSMUSG00000006262	0	1.37833e-06	1.71906e-05	5.31399e-05	0.000113169	9.84036e-05	0.000119552
ENSMUSG00000006269	0.0135759	0.000104536	0.000469354	0.000104056	0.0232408	7.23011e-05	0.0321945
ENSMUSG00000006270	0.0499927	0.00754822	0.037991	0.0253415	0.0885459	0.0758304	0.0677265
ENSMUSG00000006273	0	0	0	0	0	0	0
ENSMUSG00000006276	0	0	0	4.78943e-07	3.63164e-05	5.15797e-05	5.39002e-05
ENSMUSG00000006281	4.86434e-05	4.1174e-06	7.03114e-06	1.59503e-05	5.33553e-05	9.36946e-05	7.57298e-05
ENSMUSG00000006288	0	0	0	3.69622e-06	4.60526e-05	0.000117011	7.59377e-05
ENSMUSG00000006289	4.49211e-07	1.4871e-06	7.9154e-07	4.20894e-05	6.63952e-05	0.000128032	8.32868e-05
ENSMUSG00000006299	0	0	0	0	0	0	0
ENSMUSG00000006301	0.000172825	9.91582e-05	9.34473e-05	0.000208233	0.000468164	9.77545e-05	0.000398151
ENSMUSG00000006304	0	0	0	0	0	0	0
ENSMUSG00000006307	6.34585e-07	5.05806e-06	0	5.81101e-05	6.37499e-05	0.000125445	8.30924e-05
ENSMUSG00000006310	0.00364671	0.0011753	0.00142481	0.000941837	0.00146037	0.000889807	0.000891661
ENSMUSG00000006311	0.0304486	0.000348125	0.0736431	0.000614756	0.0134305	0.00163552	0.0143321
ENSMUSG00000006313	0.00202867	3.51717e-05	0.00181561	5.14616e-05	9.31657e-05	9.56393e-05	0.000121627
ENSMUSG00000006315	0	0	0	0	0	0	0
ENSMUSG00000006333	0	0	0	0	0	0	0
ENSMUSG00000006335	0	1.33251e-05	1.00314e-05	6.28531e-05	8.13426e-05	0.000127793	8.95714e-05
ENSMUSG00000006342	0.000171595	0	0	0	3.54746e-05	0	2.41883e-05
ENSMUSG00000006344	0	0	0	0	2.78572e-05	3.64383e-05	2.82559e-05
ENSMUSG00000006345	0.00154624	0.000100238	0.00229922	0.000129619	0.00430337	0.00031597	0.0054929
ENSMUSG00000006356	0	0	0	0	4.51772e-06	0	1.08014e-05
ENSMUSG00000006360	0	0	0	0	0	0	0
ENSMUSG00000006362	0.000173876	0	3.67379e-06	2.81415e-05	3.61847e-05	0.000103081	4.98857e-05
ENSMUSG00000006369	0	2.96084e-05	0	0.00012664	0.000708416	0.000722273	0.00466006
ENSMUSG00000006373	0	0	0	0	0	0	0
ENSMUSG00000006378	0	3.00545e-07	0.000141597	1.64423e-05	6.32642e-05	0.000122665	8.20462e-05
ENSMUSG00000006386	0.00228672	0.000196066	3.47914e-05	0.000222206	0.000569688	0.000194582	0.000403207
ENSMUSG00000006389	0.0746217	0.0189447	0.0590791	0.0133016	0.0695736	0.0184447	0.0785301
ENSMUSG00000006390	6.09999e-07	0	0	1.05028e-06	5.79583e-05	0.000108593	8.30442e-05
ENSMUSG00000006392	0	0	0	4.31794e-07	4.52283e-05	9.81615e-05	6.79939e-05
ENSMUSG00000006395	0	0.000104386	6.72143e-05	0.000100801	0.000156119	6.01085e-05	0.000202
ENSMUSG00000006398	0	0	5.82213e-07	0	3.63022e-05	0.000119685	7.8395e-05
ENSMUSG00000006403	0.000155799	0.000287923	0.000960202	0.000277723	0.000439924	0.000462347	0.00048593
ENSMUSG00000006411	0.00187416	6.47802e-06	4.79949e-05	5.30871e-05	8.50945e-05	0.000120243	8.32002e-05
ENSMUSG00000006412	0	0	0	5.42073e-07	3.87592e-05	5.24455e-05	6.77733e-05
ENSMUSG00000006418	0	0	0	0	9.4554e-07	0	0
ENSMUSG00000006423	1.07878e-06	7.69002e-05	3.91566e-05	0.000100356	0.000187604	6.45002e-05	0.000243692
ENSMUSG00000006435	0.00687395	7.65762e-05	2.38661e-05	0.000233311	0.00140593	0.000132137	0.00108549
ENSMUSG00000006442	0	0	0	0	3.79041e-05	0.000121807	7.79882e-05
ENSMUSG00000006445	0.00159576	0	0.000163238	3.11405e-06	4.42633e-05	2.88563e-05	6.25648e-05
ENSMUSG00000006456	0	0	3.56267e-06	3.16488e-05	5.07176e-05	0.000122581	7.94295e-05
ENSMUSG00000006457	0	0	0	0	0	0	0
ENSMUSG00000006463	1.18463e-05	3.04573e-06	6.9399e-05	3.35697e-05	4.26109e-05	0.000121769	6.81082e-05
ENSMUSG00000006464	0.000124807	0.000192856	0.000215076	0.000288005	0.00153127	0.000637493	0.00180039
ENSMUSG00000006469	1	0.00569183	0.0931697	0.00770852	0.0491295	0.00539726	0.0555195
ENSMUSG00000006471	2.3286e-05	0.000103897	1.18235e-05	0.000102762	0.000148157	5.96753e-05	0.000209121
ENSMUSG00000006476	0	5.55951e-06	0	5.30016e-05	9.02218e-05	0.00012822	8.83475e-05
ENSMUSG00000006488	1	0.0168169	1	0.0332991	1	0.384925	1
ENSMUSG00000006490	1	0.00675457	0.0320766	0.0188004	0.0983407	0.0222027	0.0632412
ENSMUSG00000006494	0	5.33279e-05	6.93672e-05	0.000103608	0.00019037	6.67212e-05	0.000236524
ENSMUSG00000006498	0	0	0	0	0	0	0
ENSMUSG00000006517	0.000145814	0	9.83252e-05	6.75453e-06	4.26653e-05	7.24223e-05	6.59212e-05
ENSMUSG00000006519	1.79675e-05	0	0	0	0	0	0
ENSMUSG00000006522	0.0281989	7.49717e-05	0.0536677	6.62148e-05	0.0494124	5.89647e-05	0.0539384
ENSMUSG00000006526	2.10117e-06	9.2662e-05	8.37503e-05	0.000113729	0.000372069	8.75965e-05	0.000372101
ENSMUSG00000006527	1.40004e-05	8.57867e-05	0.000209958	0.000156973	0.000386481	0.000239753	0.000423031
ENSMUSG00000006529	0.167364	0.000123652	0.00788026	0.000100206	0.000135406	5.82505e-05	0.000168381
ENSMUSG00000006538	0.0118849	0.000324095	0.000935531	0.00029408	0.011492	0.000739277	0.00779765
ENSMUSG00000006542	1	0.0100022	0.00116844	0.00310865	0.00149484	0.00182537	0.00151631
ENSMUSG00000006546	0.00230363	6.42477e-05	3.9851e-05	6.0884e-05	0.00351455	6.45724e-05	0.00290447
ENSMUSG00000006567	0	0.00201801	0.00851072	0.00131678	0.0227817	0.00246983	0.0205871
ENSMUSG00000006570	1	0.00354597	1	0.00547619	1	0.0164081	1
ENSMUSG00000006574	0.0443689	0.000117073	0.0158675	0.000289601	0.0755698	0.000959233	0.105015
ENSMUSG00000006575	0.000633386	7.95226e-05	6.93993e-05	0.00012968	0.000895852	7.65267e-05	0.000579755
ENSMUSG00000006576	0.00017969	8.25817e-05	6.93311e-05	0.000136018	0.00147363	0.000141621	0.00125417
ENSMUSG00000006585	9.37548e-06	3.71176e-05	4.22007e-05	0.000103902	0.000200046	0.000122884	0.000398259
ENSMUSG00000006586	0.00459139	0.0023787	0.00143543	0.00254394	0.00530752	0.00267726	0.00589534
ENSMUSG00000006587	0.000547471	0.00117254	0.00144436	0.00158097	0.00509826	0.00375135	0.00674251
ENSMUSG00000006589	0	0	0	0	5.10334e-05	3.66236e-05	8.06153e-05
ENSMUSG00000006599	0	0	2.60212e-06	3.55427e-05	7.90326e-05	0.000119279	9.08586e-05
ENSMUSG00000006611	0.000210479	9.72321e-05	0.000264664	0.000103237	0.000166989	6.01412e-05	0.000166325
ENSMUSG00000006641	4.69479e-05	7.84426e-05	0.000222206	0.00011589	0.000386393	7.81243e-05	0.00036612
ENSMUSG00000006642	0.176206	0.00174129	0.0335854	0.00179984	0.0547955	0.00320011	0.0520105
ENSMUSG00000006649	0.00369849	0.000266358	0.00171912	0.000212011	0.00378709	0.000380945	0.00504718
ENSMUSG00000006651	0.000830481	0	0	0	3.37547e-05	0	7.37187e-06
ENSMUSG00000006673	0	0	0	0	3.9683e-05	8.83297e-05	6.33046e-05
ENSMUSG00000006675	0.00206389	0.000321824	0.000281347	0.000367341	0.00124816	0.000579892	0.000944224
ENSMUSG00000006676	0	0	0	0	1.03798e-05	0	3.38762e-06
ENSMUSG00000006678	4.55074e-06	8.31883e-05	8.88112e-05	9.98318e-05	0.000326487	0.000585555	0.000548272
ENSMUSG00000006699	0	0	0	0	0	0	0
ENSMUSG00000006705	1.15415e-05	0.000100277	7.22448e-05	0.000103873	0.000232609	6.27311e-05	0.000274787
ENSMUSG00000006711	0.00160206	0.00158303	0.00497839	0.00115998	0.00189859	0.00119312	0.00224689
ENSMUSG00000006715	7.65041e-06	8.73865e-07	6.90764e-05	5.05029e-05	7.83709e-05	6.80111e-05	0.00012232
ENSMUSG00000006717	0	0	0	0	4.0321e-06	0	0
ENSMUSG00000006720	0.000128705	0.00031731	0.000323793	0.00162045	0.00268501	0.00241275	0.00330536
ENSMUSG00000006724	0.00269169	0.000680118	0.00897803	0.000489615	0.0185152	0.00201969	0.0122728
ENSMUSG00000006728	0	0	0	0	1.48524e-06	0	5.963e-06
ENSMUSG00000006731	0	0	0	0	0	0	0
ENSMUSG00000006732	3.74189e-05	0.000103694	6.93825e-05	0.000100129	0.000381837	0.00027395	0.00054397
ENSMUSG00000006736	0	0	0	0	2.45205e-05	0	1.9091e-05
ENSMUSG00000006740	0	0	0	0	7.65041e-06	0	2.04938e-06
ENSMUSG00000006763	0.000134879	9.23557e-05	0.000224818	0.000223122	0.000925745	0.000599148	0.00136583
ENSMUSG00000006764	0.0145088	0.000405939	0.0610798	0.000587263	1	0.00234969	0.355849
ENSMUSG00000006777	0.000864385	0	0	0	9.72395e-05	0	8.31664e-05
ENSMUSG00000006782	0	0	0	0	0	0	0
ENSMUSG00000006784	0.000464837	0.00021056	2.23073e-05	0.00029642	0.00206893	0.000617985	0.0015322
ENSMUSG00000006800	0	0	4.13099e-05	4.67662e-06	4.7335e-05	2.90415e-05	7.02453e-05
ENSMUSG00000006818	0	0	0	0	3.63045e-05	4.68453e-06	4.14978e-05
ENSMUSG00000006850	7.32055e-05	0.000105051	5.82777e-05	0.000101996	0.000288238	5.85925e-05	0.000308978
ENSMUSG00000006906	8.18321e-06	0	1.89989e-06	2.03031e-05	6.67731e-05	0.00012471	8.30812e-05
ENSMUSG00000006920	4.42886e-07	7.78015e-05	6.02579e-07	8.9047e-05	0.000120302	7.76886e-05	0.000140265
ENSMUSG00000006930	0.00013946	0	0	1.5361e-06	4.27273e-05	9.21342e-05	6.20442e-05
ENSMUSG00000006931	2.9862e-07	0.000216164	6.84496e-05	0.0010301	0.0044438	0.00127365	0.00651545
ENSMUSG00000006932	0	0	0	0	0	0	0
ENSMUSG00000006941	0	0	0	0	4.72402e-05	0.000121535	7.53867e-05
ENSMUSG00000006948	0.00611612	0	0.0026638	0	0.000331851	3.71175e-05	0.000239522
ENSMUSG00000006958	0.000179395	0.000288486	0.000100652	0.00178475	0.0138793	0.00206781	0.0190156
ENSMUSG00000006998	0	0	0	0	0	0	0
ENSMUSG00000007021	0.049656	0.0965142	0.0136476	0.0525553	0.0562403	0.0334565	0.0865338
ENSMUSG00000007029	0	0	0	0	0	0	0
ENSMUSG00000007030	0.000211599	7.70569e-05	0.000616489	0.000164816	0.000507402	6.21046e-05	0.000440149
ENSMUSG00000007033	3.16899e-07	4.19023e-07	0	0	3.53978e-05	0	5.28743e-05
ENSMUSG00000007034	0.00612948	7.71028e-05	7.93158e-05	0.000169444	0.00200649	7.20486e-05	0.00114507
ENSMUSG00000007035	0.000321148	0.000112909	0.00133821	0.000191016	0.00395228	0.00035683	0.00399453
ENSMUSG00000007036	0	0	0	0	1.33477e-05	0	1.56218e-06
ENSMUSG00000007038	6.80527e-05	6.88267e-05	6.75205e-05	7.28697e-05	0.000141782	8.38217e-05	0.000134896
ENSMUSG00000007039	0	2.85843e-06	0	8.36175e-05	0.000145077	5.8247e-05	0.000255797
ENSMUSG00000007041	0	0	0	0	0	0	0
ENSMUSG00000007044	0.00241149	1	0.00787387	0.00790294	1	0.0088104	0.00292733
ENSMUSG00000007050	0	0	0	1.97197e-06	5.07779e-05	0.000123009	8.31979e-05
ENSMUSG00000007080	0.0001765	9.17771e-05	0.000241136	0.000100861	0.000460484	0.000179911	0.00145413
ENSMUSG00000007097	0.00128091	0	0	0	1.95968e-05	0	1.88285e-06
ENSMUSG00000007107	0.0693934	0.00170589	0.000453877	0.00106118	0.00161397	0.00089648	0.00119055
ENSMUSG00000007122	0.00190309	0.000764752	0.000606302	0.00143656	0.00558321	0.00189711	0.00550015
ENSMUSG00000007207	0.000213277	0.000277967	0.000324622	0.000396295	0.000585121	0.000465163	0.000660339
ENSMUSG00000007209	0.0375144	0.000104617	0.0160705	0.000104274	1	0.000368766	1
ENSMUSG00000007216	0.000126894	0.000939882	0.000436353	0.00153678	0.00318285	0.00165191	0.00377699
ENSMUSG00000007279	0.00215826	0.00207989	0.03059	0.00206834	0.00720721	0.0040161	0.00638257
ENSMUSG00000007338	0	0	4.79764e-07	3.47243e-05	7.4184e-05	0.000123292	8.48436e-05
ENSMUSG00000007379	0	0.000118616	0.000205105	0.000347174	0.000127442	0.00032559	0.000145817
ENSMUSG00000007411	0	0	0	7.80532e-07	4.27703e-05	9.51574e-05	7.14202e-05
ENSMUSG00000007415	0	1.84531e-06	1.74394e-06	5.41736e-05	8.41215e-05	7.07947e-05	0.000107882
ENSMUSG00000007440	0.00719428	0.0222879	0.00877889	0.025774	0.0520309	0.0334918	0.047479
ENSMUSG00000007457	1	0.00686571	1	0.0022995	0.135133	0.0109238	1
ENSMUSG00000007458	0	0	0	0	0	0	0
ENSMUSG00000007476	0.000115407	7.78212e-05	6.92612e-05	0.000163461	0.000366973	6.75405e-05	0.000369281
ENSMUSG00000007480	0.000135837	0.0150447	0.149712	0.0357475	0.0382436	0.132687	0.138707
ENSMUSG00000007564	0	0	0	0	0	0	0
ENSMUSG00000007570	1.35494e-05	9.67737e-05	2.78502e-05	9.98495e-05	0.000182778	6.19606e-05	0.000250229
ENSMUSG00000007589	7.30244e-07	8.29486e-07	3.29657e-05	4.55631e-05	5.21585e-05	0.000128551	7.87395e-05
ENSMUSG00000007591	0.000732372	0.00559829	0.00122642	0.00603756	0.00749051	0.00593309	0.00802037
ENSMUSG00000007594	0.0238799	0.00131729	0.00773233	0.0022923	0.0611202	0.00419741	0.0638106
ENSMUSG00000007603	0	0	0	1.03145e-06	3.31601e-05	4.65857e-05	3.31075e-05
ENSMUSG00000007610	5.51489e-06	9.82166e-05	2.80282e-05	0.000101947	0.000136934	5.8215e-05	0.000190483
ENSMUSG00000007613	0	0	0	6.33376e-05	7.44988e-05	6.07748e-05	8.39485e-05
ENSMUSG00000007617	0.000156671	0.000479948	0.000453264	0.00101945	0.00140055	0.00141179	0.0013102
ENSMUSG00000007646	0.000365388	0.000686509	0.00143062	0.00158939	0.0052914	0.00275919	0.00624984
ENSMUSG00000007653	0.124341	0.0021012	0.00157302	0.0018203	0.0326302	0.00541412	0.0311123
ENSMUSG00000007655	0.000195693	0.000279457	0.000256641	0.000784578	0.023655	0.0021954	0.0217954
ENSMUSG00000007656	0	0	0	0	4.22744e-05	0.000104756	7.13071e-05
ENSMUSG00000007659	4.90515e-06	0	1.9909e-05	0	0	0	0
ENSMUSG00000007670	0	0	0	0	3.14322e-05	8.47473e-06	2.99908e-05
ENSMUSG00000007682	0.00176642	0.000476327	0.000849051	0.00138504	0.0352432	0.00316743	0.0351854
ENSMUSG00000007721	0	0	0	0	1.58401e-06	0	0
ENSMUSG00000007739	0	0	0	0	0	0	0
ENSMUSG00000007777	0	1.70642e-06	5.4411e-06	5.11467e-05	7.7033e-05	0.000128636	8.52103e-05
ENSMUSG00000007783	0.000180009	9.24618e-05	6.86908e-05	0.000103447	8.83234e-05	5.85874e-05	0.000109898
ENSMUSG00000007805	2.84122e-06	0.0102549	1	0.0110124	1	0.0303591	1
ENSMUSG00000007812	0	6.01145e-05	6.66157e-05	0.000100427	0.000289811	6.40536e-05	0.000311692
ENSMUSG00000007815	0	0	0	0	0	0	0
ENSMUSG00000007817	0	0	0	5.11766e-06	3.74055e-05	3.81169e-05	4.61703e-05
ENSMUSG00000007827	0.000179847	0.000297171	0.000435315	0.00155647	0.00334806	0.00357767	0.00591878
ENSMUSG00000007833	1.15342e-06	4.02221e-07	1.02638e-05	3.43768e-05	6.80848e-05	0.000122971	8.32177e-05
ENSMUSG00000007836	0	0	0	0	1.16647e-06	0	7.50625e-07
ENSMUSG00000007837	2.35297e-07	1.20043e-05	1.08714e-06	6.10339e-05	7.98302e-05	0.000128533	8.37297e-05
ENSMUSG00000007850	0	0	0	0	0	0	0
ENSMUSG00000007867	0	0	0	9.17934e-06	6.73776e-05	0.000121833	8.19335e-05
ENSMUSG00000007872	0	0	0	3.69535e-07	9.4089e-05	8.53854e-05	0.000111883
ENSMUSG00000007877	1	0.00181257	0.0189452	0.0026939	0.0424744	0.00223118	0.0299322
ENSMUSG00000007880	0	0	0	1.95668e-05	4.86154e-05	0.000120406	7.84352e-05
ENSMUSG00000007888	0.0845186	0.00148968	0.00974162	0.00297435	0.0533727	0.00505494	0.0515893
ENSMUSG00000007891	0	0	0	0	3.12237e-05	0	5.02319e-06
ENSMUSG00000007892	0	0	0	0	0	0	0
ENSMUSG00000007907	1	0.0244451	1	0.0084005	1	0.0143095	0.243406
ENSMUSG00000007908	0.000915102	0.00473372	0.00208931	0.00508708	0.016011	0.00981037	0.017313
ENSMUSG00000007944	0.0468532	0.00622797	1	0.00313531	0.0976256	0.00712906	0.18308
ENSMUSG00000007946	0.000177642	9.70257e-05	6.93281e-05	0.000215968	0.000506508	0.000170406	0.000461094
ENSMUSG00000007950	2.91511e-05	8.1959e-05	4.51993e-05	0.00010753	0.000351282	7.64956e-05	0.000344256
ENSMUSG00000007987	0	0	0	0	5.7404e-05	6.01879e-05	7.85996e-05
ENSMUSG00000007989	2.10343e-05	0.000413072	0.000240832	0.00163525	0.00580213	0.00244156	0.00910213
ENSMUSG00000008028	0.00112186	0.000750112	0.00314835	0.000838244	0.00347898	0.00167728	0.00305349
ENSMUSG00000008035	0.000177732	0	2.94892e-06	5.58876e-05	0.000132974	0.000125798	0.000125264
ENSMUSG00000008036	0	0	0	0	0	0	0
ENSMUSG00000008090	0.000144312	7.77875e-05	0.000215378	0.0002496	0.000591525	0.000363598	0.000548165
ENSMUSG00000008129	0.000756903	0.000695613	0.0015134	0.00130427	0.00600561	0.00211605	0.00653726
ENSMUSG00000008136	0.000125669	8.16251e-05	1.19456e-06	0.000332955	0.00531812	0.000751325	0.00613299
ENSMUSG00000008140	0	0	0	0	3.49039e-05	9.19033e-07	3.38652e-05
ENSMUSG00000008153	0.0157004	0.000248634	0.00117145	0.00019849	0.0136117	0.000311542	0.0129586
ENSMUSG00000008167	0	8.75032e-07	0	6.29751e-05	9.52383e-05	0.000106443	0.000120947
ENSMUSG00000008193	0.000180028	0	0	0	0	0	0
ENSMUSG00000008200	0	0	0	4.92924e-06	5.28624e-05	0.000121534	8.043e-05
ENSMUSG00000008206	0.000683388	8.9678e-05	0.000232769	0.000208614	0.000565056	0.000230822	0.00056857
ENSMUSG00000008226	0.00016823	0.000283616	0.000305163	0.000357806	0.000777535	0.000727147	0.000792814
ENSMUSG00000008301	0	0	0	5.41488e-05	7.74414e-05	0.000121216	9.12284e-05
ENSMUSG00000008305	0	3.04728e-06	1.75639e-05	4.82542e-05	5.29387e-05	0.000121555	7.76096e-05
ENSMUSG00000008307	0.000171385	0.000557293	0.000300976	0.000424375	0.00163849	0.00194705	0.00252
ENSMUSG00000008318	0.000132441	0	0	0	1.29961e-05	6.52814e-07	6.06156e-06
ENSMUSG00000008333	0	0	0	5.66883e-06	6.78537e-05	0.000125341	8.34197e-05
ENSMUSG00000008348	0	0	0	0	0	0	0
ENSMUSG00000008373	0	0	0	6.42297e-06	5.46585e-05	0.000122347	8.23585e-05
ENSMUSG00000008384	4.46527e-07	0	0	3.58713e-06	4.24232e-05	6.40897e-05	6.6137e-05
ENSMUSG00000008393	0	0	0	8.57475e-07	4.72843e-05	0.000127861	8.42924e-05
ENSMUSG00000008398	0.000179107	0	0	5.47149e-05	8.32328e-05	6.37843e-05	9.68065e-05
ENSMUSG00000008429	0	0	0	9.04511e-06	5.60246e-05	0.000121791	8.12276e-05
ENSMUSG00000008435	0.000163821	0.00010732	7.72616e-05	0.000299784	0.00165856	0.000706864	0.00214688
ENSMUSG00000008438	0.0144714	0.082335	0.0170137	0.148196	0.0683766	0.174069	0.0773572
ENSMUSG00000008450	0	1.98434e-05	1.86707e-05	6.25195e-05	0.000101514	5.8242e-05	0.000203234
ENSMUSG00000008461	6.74966e-05	0	0	0	7.77145e-06	0	1.94375e-06
ENSMUSG00000008475	0	0	0	0	0	0	0
ENSMUSG00000008482	0.0205241	0.347537	0.078317	0.238431	1	0.0896869	0.139322
ENSMUSG00000008489	0.021091	0.00492605	0.0216453	0.00645101	0.0268505	0.0197197	0.0287944
ENSMUSG00000008496	0.0193825	0.00203634	0.0631183	0.00217599	0.0936444	0.00344139	0.0621802
ENSMUSG00000008540	9.61578e-07	1.36727e-05	0	9.50356e-05	0.000252302	9.84593e-05	0.00023171
ENSMUSG00000008575	0	0.000105285	1.74217e-05	0.000295772	0.00116025	0.00141028	0.00313964
ENSMUSG00000008590	0.0423728	0.007825	0.0814255	0.00751076	0.123003	0.0250437	0.279082
ENSMUSG00000008601	0.00112882	0	0	0	2.74371e-06	0	0
ENSMUSG00000008604	7.96433e-07	0	0	5.58298e-05	7.90589e-05	0.000120316	9.23337e-05
ENSMUSG00000008658	0.000142392	0.000101467	1.93221e-05	0.000103962	0.00013691	5.8993e-05	0.000208356
ENSMUSG00000008668	0	0	0	0	0	0	0
ENSMUSG00000008682	0	0	0	0	0	0	0
ENSMUSG00000008683	0	0	0	0	0	0	0
ENSMUSG00000008686	0.000122281	0.000160747	0.000138868	0.000257125	0.00143649	0.000911398	0.00164488
ENSMUSG00000008690	0	0	0	0	7.89288e-06	0	3.44882e-06
ENSMUSG00000008730	0	0	0	4.21816e-07	3.61206e-05	1.14654e-05	2.8703e-05
ENSMUSG00000008734	0.000177989	9.75336e-05	1.91808e-05	0.000215584	0.000888708	0.000192241	0.00113641
ENSMUSG00000008763	0	3.00317e-05	0	0.000101396	0.000374854	8.18274e-05	0.000458256
ENSMUSG00000008789	1	0.0139628	0.465911	0.00763871	1	0.036595	0.438044
ENSMUSG00000008813	1	0.00441513	1	0.00398506	0.0293784	0.0125176	0.0351336
ENSMUSG00000008822	9.96882e-05	8.68112e-05	6.97019e-05	0.000194449	0.000407808	0.000112711	0.000400445
ENSMUSG00000008843	0.000857687	0	0.000293294	0	0	0	0
ENSMUSG00000008845	0.00424262	0.000510741	0.00805968	0.000747529	0.0270431	0.00161323	0.0381243
ENSMUSG00000008855	0.000122833	9.50927e-05	2.40059e-06	0.000100455	0.000631606	5.86125e-05	0.000466052
ENSMUSG00000008859	0	0	0	0	2.19885e-05	8.42071e-07	7.29141e-06
ENSMUSG00000008874	1	0.000285115	1	0.000259321	1	0.000850718	1
ENSMUSG00000008892	0	0	0	0	0	0	0
ENSMUSG00000008932	0.0017339	0.00343876	0.00104684	0.00254231	0.00644982	0.00343203	0.00582525
ENSMUSG00000008958	0	0	0	0	3.20674e-05	3.5151e-06	2.82483e-05
ENSMUSG00000008976	0	2.39217e-06	6.72876e-06	6.09662e-05	9.52201e-05	6.56724e-05	0.000123576
ENSMUSG00000008999	0	0	0	2.58563e-05	4.52576e-05	0.000110961	7.84031e-05
ENSMUSG00000009013	0	0	0	0	0	0	0
ENSMUSG00000009030	0	2.77001e-06	5.42448e-06	5.99189e-05	8.39535e-05	0.000108011	8.87098e-05
ENSMUSG00000009035	0	0	0	2.14858e-06	3.62979e-05	7.80642e-05	5.12623e-05
ENSMUSG00000009047	1	0.0135484	1	0.0112105	1	0.0438539	1
ENSMUSG00000009070	0.00678834	0.00507889	0.00180998	0.00955351	0.0185335	0.020824	0.0284986
ENSMUSG00000009073	0	0	0	0	3.60992e-05	3.8588e-05	5.90758e-05
ENSMUSG00000009075	0.000130392	0.00028648	0.000523518	0.000394579	0.0024135	0.000819982	0.00246411
ENSMUSG00000009076	0	0	0	3.75751e-06	4.23001e-05	8.15341e-05	6.84119e-05
ENSMUSG00000009079	0	0	0	0	0	0	0
ENSMUSG00000009090	0	0	0	0	2.16884e-05	0	6.70098e-06
ENSMUSG00000009092	0.000832705	9.83796e-05	0.000531709	6.67621e-05	0.000145412	0.000104256	0.000138302
ENSMUSG00000009093	0.0488882	0.00203106	0.0224485	0.00108418	0.0213121	0.00182784	0.0119755
ENSMUSG00000009097	0.00796857	0.000290135	0.00216806	0.000324771	0.00299054	0.00105198	0.00326093
ENSMUSG00000009108	0.0146719	0.000659959	0.0121278	0.000753588	0.0188668	0.00242141	0.0163821
ENSMUSG00000009112	1.86374e-07	4.73201e-06	2.79652e-05	6.09991e-05	9.95798e-05	9.39304e-05	0.000122406
ENSMUSG00000009114	0.000204976	0.000140638	0.000146992	0.000411708	0.00204648	0.000596343	0.00196666
ENSMUSG00000009115	0.0130715	0.0170719	0.0307952	0.020258	0.0378142	0.027846	0.0535134
ENSMUSG00000009145	0.000395561	0.000322886	0.00026806	0.000219654	0.000378753	7.7631e-05	0.000365963
ENSMUSG00000009185	0.000912686	0	7.49504e-05	0	0.000327696	7.73029e-06	0.00139978
ENSMUSG00000009207	0.000129177	8.24896e-05	0.000185831	0.000121949	0.000747269	0.000502374	0.000593814
ENSMUSG00000009210	0.000121824	0.000103207	0.000198496	0.000104213	0.000315001	5.91233e-05	0.000268309
ENSMUSG00000009214	0.00997259	0.000222942	0.0013246	0.000222679	0.00681542	0.00072357	0.00587223
ENSMUSG00000009216	0.00201274	0.000351335	0.00225061	0.00062016	0.00401796	0.0011057	0.00411264
ENSMUSG00000009246	0.00199952	4.84393e-05	0	5.66961e-05	0.000146368	0.000112837	8.37547e-05
ENSMUSG00000009248	0.00017102	0.000241643	0.00031356	0.000317594	0.017618	0.000839175	0.0147755
ENSMUSG00000009281	0.000145706	0	7.39084e-05	0	9.16296e-05	6.6814e-06	8.29856e-05
ENSMUSG00000009291	0	0	0	0	3.32181e-05	0	1.24939e-05
ENSMUSG00000009292	0	9.88377e-05	0.000128107	0.000127447	0.000283969	0.000103612	0.000339727
ENSMUSG00000009293	0	0	0	0	3.60259e-05	3.5428e-05	4.4736e-05
ENSMUSG00000009350	0.00290781	0	0.00374042	0	0.0144624	2.37423e-05	0.0137531
ENSMUSG00000009356	0.000100315	0	0	0	0	0	0
ENSMUSG00000009376	0.000122828	8.92273e-05	0.000201021	0.000100012	0.000718599	8.03384e-05	0.000480586
ENSMUSG00000009378	0.036984	0.000110403	0.00152854	0.000187963	0.00281698	0.000487835	0.00275134
ENSMUSG00000009394	0.00727481	6.59393e-06	0.000392851	4.84523e-05	1.32889e-05	0.000121745	3.61463e-06
ENSMUSG00000009406	0.000117114	0.000199763	0.000166954	0.000297528	0.000674291	0.000506984	0.000729592
ENSMUSG00000009418	0	0.000120979	7.02346e-05	0.000250741	0.00155396	0.000559805	0.00196118
ENSMUSG00000009470	0	0	0	0	3.72289e-05	8.10165e-05	5.7521e-05
ENSMUSG00000009471	1	0.000876021	0.0807384	0.0017157	1	0.00636678	0.184691
ENSMUSG00000009487	0.0193721	0.000247911	0.0251153	0.000278945	0.0390893	0.000774692	0.0622599
ENSMUSG00000009535	6.37287e-06	3.82106e-05	6.88562e-05	8.36241e-05	0.000134958	5.81889e-05	0.000192347
ENSMUSG00000009545	0.00443357	2.7376e-05	0	4.19828e-05	0.000187919	0.000110043	0.000253514
ENSMUSG00000009549	0	0	0	0	0	0	0
ENSMUSG00000009551	0.0104671	0.000101829	0.0116387	0.000145404	0.000125297	6.77037e-05	0.000166532
ENSMUSG00000009555	0	0	0	0	3.12563e-05	1.11029e-06	1.9766e-05
ENSMUSG00000009563	6.08132e-07	0	5.95883e-07	3.05976e-05	6.53867e-05	0.000122307	8.08729e-05
ENSMUSG00000009566	1.33455e-06	9.16003e-05	7.83101e-05	0.000131989	0.000391132	0.000308131	0.000520707
ENSMUSG00000009569	0	8.02121e-05	1.41521e-05	9.98329e-05	0.000120936	5.95226e-05	0.000203822
ENSMUSG00000009575	0	7.59515e-06	6.71261e-06	6.13741e-05	0.000123472	5.95846e-05	0.000237074
ENSMUSG00000009580	0.0687234	0.00021069	0.0192435	0.000172664	0.0642178	0.000890579	0.0279589
ENSMUSG00000009585	0	0	0	0	0	0	0
ENSMUSG00000009588	0.0146126	0.000529523	0.00437354	0.000429308	0.000424818	0.000530139	0.000389291
ENSMUSG00000009596	0.0207976	0.011804	0.0686127	0.007986	0.0297386	0.0288166	0.104256
ENSMUSG00000009614	0.000665364	0.000104416	0.000635255	0.000103742	0.00043154	6.06908e-05	0.000535091
ENSMUSG00000009621	3.45369e-05	0	1.59203e-05	2.4077e-05	3.83637e-05	9.59824e-05	5.54208e-05
ENSMUSG00000009628	0.00245423	0.0050605	0.00697049	0.00869522	0.0283548	0.03048	0.036523
ENSMUSG00000009630	0	0	0	0	1.19435e-05	0	4.30305e-06
ENSMUSG00000009633	0	7.65743e-05	1.98021e-05	0.000105753	0.00109411	5.95224e-05	0.00204624
ENSMUSG00000009640	0	0	0	5.61863e-06	5.15935e-05	0.000121735	7.57971e-05
ENSMUSG00000009646	0.0203736	0.000287674	0.0104144	0.000242817	0.0116569	0.000752676	0.0115354
ENSMUSG00000009647	0	2.42657e-05	2.02503e-05	6.2721e-05	7.81037e-05	0.00010365	8.65304e-05
ENSMUSG00000009654	0.00955222	0.00315403	0.0874176	0.00371397	0.107435	0.0115787	0.115226
ENSMUSG00000009670	0.00266856	0.000236273	0.0124621	0.000230807	0.000915362	0.000762826	0.00163027
ENSMUSG00000009681	0	0	0	5.30187e-05	5.97025e-05	0.000118256	8.43418e-05
ENSMUSG00000009687	0.000737803	0.000290886	0.000997642	0.00037002	0.00450265	0.00106027	0.0031672
ENSMUSG00000009731	0.0007146	0.00304957	0.00155892	0.00375091	0.00561311	0.00367102	0.00644562
ENSMUSG00000009733	2.56162e-07	0.000103165	6.79388e-05	0.00010042	0.000270119	7.83324e-05	0.000332201
ENSMUSG00000009734	0.0224016	0.00203106	0.0309275	0.00227409	0.00269259	0.00266229	0.00381185
ENSMUSG00000009739	6.56591e-05	0.000952572	7.50969e-05	0.00355092	0.00529464	0.00433613	0.00593567
ENSMUSG00000009741	0	0	0	0	3.61163e-05	4.03454e-05	5.17141e-05
ENSMUSG00000009772	0.000693315	1.07981e-06	6.93772e-05	2.47931e-05	7.82244e-05	0.000112788	8.31932e-05
ENSMUSG00000009828	9.48596e-05	0.000287806	0.000208391	0.000369911	0.00189111	0.000858053	0.00229592
ENSMUSG00000009863	0	0	0	0	0	0	0
ENSMUSG00000009876	0.00232502	0.00010537	0.00152399	0.000100953	0.00422596	6.94337e-05	0.00440652
ENSMUSG00000009894	0	0	0	9.17996e-07	3.64693e-05	9.14496e-05	5.6876e-05
ENSMUSG00000009900	0.000712749	0.00424784	0.0161464	0.00643329	0.0246048	0.0063354	0.021295
ENSMUSG00000009905	0.00016954	9.84445e-05	7.16564e-05	0.000217976	0.000743942	0.000491913	0.000981721
ENSMUSG00000009907	0	0	0	9.3498e-06	6.46753e-05	0.000121679	8.22939e-05
ENSMUSG00000009927	0	0	0	0	0	0	0
ENSMUSG00000009941	0.000153383	0.000729634	0.00335709	0.000979557	0.00235255	0.00203821	0.00230934
ENSMUSG00000009995	0	0	0	0	2.10419e-05	0	9.33633e-06
ENSMUSG00000010021	0.0226841	0.000262699	0.000565486	0.000317372	0.00258251	0.000754868	0.0023936
ENSMUSG00000010025	0	0	0	0	3.56899e-05	2.6521e-06	3.99753e-05
ENSMUSG00000010044	0.000888596	9.66999e-05	0.000230498	0.000102014	0.0189163	0.000420895	0.0168783
ENSMUSG00000010045	0	5.65536e-07	5.07053e-07	4.02595e-05	7.63584e-05	0.000124324	8.47169e-05
ENSMUSG00000010047	3.04419e-06	7.39061e-06	0	8.49691e-05	0.000106675	8.3999e-05	0.000132812
ENSMUSG00000010048	0	0	0	0	3.67599e-05	8.81027e-05	6.37054e-05
ENSMUSG00000010051	2.46992e-05	0.000271282	4.876e-05	0.000435883	0.000792439	0.000657451	0.000589682
ENSMUSG00000010054	0	1.12701e-05	6.30449e-06	5.33859e-05	7.2486e-05	0.000129579	8.3201e-05
ENSMUSG00000010057	0	0	0	1.6217e-05	4.62215e-05	0.000118248	7.62052e-05
ENSMUSG00000010064	0.000678072	9.59703e-05	0.00175926	9.98499e-05	0.00562311	7.80465e-05	0.00531131
ENSMUSG00000010066	0.00329098	6.01083e-06	6.80661e-05	5.87553e-05	0.00363421	6.01632e-05	0.00346255
ENSMUSG00000010067	0	0	0	5.52981e-05	7.67295e-05	0.000104422	0.000100012
ENSMUSG00000010080	0.00024583	9.63879e-05	6.65656e-05	0.000183709	0.00181958	8.92633e-05	0.00124076
ENSMUSG00000010086	0.0837249	0.00138807	0.0124008	0.000717211	0.119304	0.0017672	0.147927
ENSMUSG00000010095	0	0	0	0	0	0	0
ENSMUSG00000010097	0	0	0	0	1.66148e-06	0	0
ENSMUSG00000010110	0	0	0	3.82345e-06	4.65651e-05	0.000111322	7.23557e-05
ENSMUSG00000010122	7.64292e-07	0.000276646	0.000268555	0.000303356	0.00567479	0.000816447	0.00704855
ENSMUSG00000010136	0.054118	0.000105386	0.000207969	0.000153579	0.000473566	0.00036267	0.000612791
ENSMUSG00000010142	0.000421934	0.00139677	0.000604751	0.00158468	0.0116081	0.00283624	0.0132982
ENSMUSG00000010154	0.000718226	7.73232e-05	1.56777e-06	0.000134572	0.000906644	5.83244e-05	0.000429987
ENSMUSG00000010175	0.0693469	0.000486755	7.08502e-05	0.0016412	0.0050572	0.00160985	0.00389065
ENSMUSG00000010205	0	0	0	0	3.53264e-05	4.41609e-05	3.15189e-05
ENSMUSG00000010277	0	0	0	0	2.5063e-05	8.35632e-07	2.60361e-05
ENSMUSG00000010290	4.71986e-07	7.7983e-05	6.27939e-05	0.000101058	0.000166872	5.98918e-05	0.000235
ENSMUSG00000010307	0.000141109	3.44629e-07	0	2.8937e-05	0.000372386	0.000125954	0.00035032
ENSMUSG00000010311	0.00100196	3.84919e-06	0.00014192	6.46909e-05	8.4781e-05	7.13252e-05	0.000106509
ENSMUSG00000010342	0.00216717	2.40028e-05	0.00187143	6.63774e-05	0.000130902	5.96216e-05	0.000177768
ENSMUSG00000010358	0	0	0	0	0	0	0
ENSMUSG00000010362	4.57462e-05	0	5.28764e-06	0	7.44417e-05	9.01971e-05	8.52569e-05
ENSMUSG00000010376	0	0	0	0	0	0	0
ENSMUSG00000010392	0	4.72796e-06	4.81197e-06	5.51264e-05	7.54497e-05	0.000128405	8.3252e-05
ENSMUSG00000010406	0	0	0	0	0	0	0
ENSMUSG00000010435	0.0195291	0.000485093	0.0152422	0.000723342	1	0.00172092	1
ENSMUSG00000010453	0	0	0	0	7.12413e-06	0	1.83564e-06
ENSMUSG00000010461	0	0	0	1.27476e-05	4.79734e-05	0.000128694	8.26114e-05
ENSMUSG00000010476	0.00457241	0.00156346	0.00491861	0.00151316	0.00831068	0.00195899	0.00777147
ENSMUSG00000010505	0.0219782	0.00173281	0.00081772	0.00208936	0.0115711	0.00207799	0.00839358
ENSMUSG00000010517	0	0	0	0	3.85719e-05	8.57122e-05	5.9827e-05
ENSMUSG00000010529	5.49953e-05	4.75396e-05	6.93461e-05	8.28095e-05	0.000225013	5.93098e-05	0.000328436
ENSMUSG00000010538	0.000169814	0.000281829	0.000194571	0.000318383	0.00056324	0.000801914	0.00101531
ENSMUSG00000010554	0.000174436	0.000271757	0.000280199	0.000342929	0.00138499	0.000982935	0.00167946
ENSMUSG00000010592	0.00511346	0.0016374	0.0416746	0.00240002	0.0154285	0.00513966	0.0122945
ENSMUSG00000010601	0.0141798	0.000279931	0.00753519	0.00026131	0.00428032	0.000582756	0.00484032
ENSMUSG00000010607	0	0	0	0	3.96478e-05	2.95172e-05	5.72945e-05
ENSMUSG00000010608	0	0	0	0	3.59224e-05	3.93687e-05	5.19005e-05
ENSMUSG00000010609	0.000132705	8.68263e-05	5.62104e-05	7.28353e-05	0.00031023	6.40214e-05	0.00031824
ENSMUSG00000010651	0	0	1.56947e-06	0	6.76737e-05	1.69111e-05	8.04541e-05
ENSMUSG00000010660	0	2.79446e-05	0	0.00010416	0.000292835	5.82899e-05	0.000319127
ENSMUSG00000010663	8.28927e-06	2.6831e-05	2.63242e-05	0.000129903	0.00149112	0.00110052	0.00414281
ENSMUSG00000010721	0.000151857	0.000114322	7.65813e-05	0.000168562	0.000769832	0.000417102	0.00071414
ENSMUSG00000010751	0.000147154	0.000264814	0.000174843	0.000386621	0.0017231	0.00108825	0.00183842
ENSMUSG00000010755	0	7.97985e-07	5.96273e-06	5.17973e-05	7.69581e-05	0.000130007	8.86642e-05
ENSMUSG00000010760	0.00558918	0.000417521	0.00165399	0.000436678	0.0107513	0.00184691	0.00773045
ENSMUSG00000010796	0.0230018	0.00029003	0.0301222	0.00039317	0.0679247	0.00198333	0.0492326
ENSMUSG00000010797	0.0139578	0.000517798	0.0197039	0.000541144	0.00666726	0.00141186	0.00500057
ENSMUSG00000010803	0.130611	0.00276758	0.0157064	0.00591245	0.151925	0.0107704	0.252854
ENSMUSG00000010825	0.00289977	0.00115853	0.00899468	0.00117934	0.0178453	0.00110607	0.018101
ENSMUSG00000010830	0.000179616	0.000116539	0.000460966	0.000303206	0.00295488	0.00104356	0.00412668
ENSMUSG00000010841	1	0.0307286	1	0.038627	1	1	1
ENSMUSG00000010911	0	0	0	5.77447e-05	0.000135328	5.82077e-05	0.00028262
ENSMUSG00000010914	7.16125e-06	5.56098e-05	6.17011e-05	7.732e-05	0.00012426	5.87536e-05	0.000168965
ENSMUSG00000010936	0	0	0	1.28161e-06	3.64996e-05	6.60434e-05	5.201e-05
ENSMUSG00000011008	0.00277632	0.00148032	0.010634	0.000742425	0.0901972	0.00362606	0.0824928
ENSMUSG00000011034	0.006909	8.68902e-05	0.000299809	0.000106366	0.00603078	6.18562e-05	0.00425708
ENSMUSG00000011096	0	6.54604e-06	2.67405e-06	5.89236e-05	7.93676e-05	0.000127474	8.42961e-05
ENSMUSG00000011114	0	0	0	0	8.48447e-07	0	0
ENSMUSG00000011118	0.137042	0.0768741	0.158025	0.0482145	1	0.0807501	0.342751
ENSMUSG00000011148	5.5473e-05	7.71584e-05	0.00124551	0.000151812	0.00548075	0.000468892	0.0040856
ENSMUSG00000011154	0.00501425	0.000290076	0.000955816	0.000462451	0.00128979	0.000942801	0.00120844
ENSMUSG00000011158	0	2.69828e-07	0	4.44799e-05	6.51633e-05	0.000129256	8.3204e-05
ENSMUSG00000011171	0.00192458	0.0030816	0.00160728	0.00154373	0.0100829	0.00198556	0.0102787
ENSMUSG00000011179	0	0	0	0	0	0	0
ENSMUSG00000011254	3.54872e-05	9.81204e-05	8.06438e-05	0.000103768	0.000266507	9.42812e-05	0.00034108
ENSMUSG00000011256	1.21924e-06	0	6.93984e-05	7.7104e-06	4.66833e-06	2.23544e-05	0
ENSMUSG00000011257	0	0	0	0	2.81291e-05	8.0805e-06	3.05821e-05
ENSMUSG00000011263	0.000773891	0.000318552	0.00560556	0.00120599	0.0411753	0.00279986	0.0606232
ENSMUSG00000011267	0.000776771	0.000105	7.8244e-05	0.000103469	0.000129256	5.85886e-05	0.000181634
ENSMUSG00000011305	0.00488341	0.00243193	0.00529314	0.00358375	0.0173036	0.00552271	0.0258034
ENSMUSG00000011306	0	0	0	6.74464e-07	4.25492e-05	8.99581e-05	6.74657e-05
ENSMUSG00000011349	0.0829927	0.0316454	1	0.0337908	0.107024	0.137531	0.130672
[truncated: 20,898 more rows]
