# Supplementary material for: Population and single-cell genomics reveal the Aire dependency, relief from Polycomb silencing, and distribution of self-antigen expression in thymic epithelia
Source: Genome Res. 2014 Dec;24(12):1918–31. doi: 10.1101/gr.171645.113 (PMC4248310; doi:10.1101/gr.171645.113)
Supplement: Supplemental Material [file supp_gr.171645.113_Supplemental_Table3.xlsx]

## Sheet: DESeq_comparisons
Supplementary Table 3. Genes differentially expressed between all pair-wise combinations of the seven sequenced TEC populations
Population A	Population B	Worksheet
cTEC	mature_TEC	1
cTEC	Aire_neg_TEC	2
cTEC	Aire_pos_TEC	3
cTEC	Aire_ko_TEC	4
cTEC	immature_TEC	5
cTEC	mTEC	6
mature_TEC	Aire_neg_TEC	7
mature_TEC	Aire_pos_TEC	8
mature_TEC	Aire_ko_TEC	9
mature_TEC	immature_TEC	10
mature_TEC	mTEC	11
Aire_neg_TEC	Aire_pos_TEC	12
Aire_neg_TEC	Aire_ko_TEC	13
Aire_neg_TEC	immature_TEC	14
Aire_neg_TEC	mTEC	15
Aire_pos_TEC	Aire_ko_TEC	16
Aire_pos_TEC	immature_TEC	17
Aire_pos_TEC	mTEC	18
Aire_ko_TEC	immature_TEC	19
Aire_ko_TEC	mTEC	20
immature_TEC	mTEC	21

## Sheet: 1
Go back to DESeq comparisons
cTEC vs mature_TEC (>2 fold, 5% FDR, DESeq analysis)
Ensembl ID	Gene Symbol	cTEC (mean counts)	mature_TEC (mean counts)	Fold Change	FDR (BH)
ENSMUSG00000048087	Gm4737	2.86132	0	0	0.0352963
ENSMUSG00000056673	Kdm5d	880.402	0	0	1.32412e-23
ENSMUSG00000062678	Gm10120	2.43481	0	0	0.0786225
ENSMUSG00000075480	Gm10840	3.3526	0	0	0.0344222
ENSMUSG00000078894	2210418O10Rik	11.7044	0	0	0.0251484
ENSMUSG00000079635	Rhox4c	2.41322	0	0	0.0748103
ENSMUSG00000080907	4930455H04Rik	9.56653	0	0	2.57887e-05
ENSMUSG00000090780	Gm17532	2.41322	0	0	0.0767527
ENSMUSG00000093430	Isl2	25.9678	0	0	7.43179e-11
ENSMUSG00000069045	Ddx3y	2756.24	1.76336	0.00063977	5.32586e-30
ENSMUSG00000068457	Uty	1116.31	0.887802	0.000795301	4.12112e-25
ENSMUSG00000069049	Eif2s3y	1159.52	1.75112	0.00151021	4.46619e-29
ENSMUSG00000061353	Cxcl12	43194.6	362.19	0.00838507	0
ENSMUSG00000006179	Prss16	302291	2798.36	0.00925717	9.26974e-56
ENSMUSG00000072423	Psmb11	45444.8	440.43	0.00969153	2.59781e-40
ENSMUSG00000026188	Tmem169	3703.62	36.7734	0.00992906	5.29436e-187
ENSMUSG00000043099	Hic1	6161.67	62.6575	0.0101689	4.57961e-29
ENSMUSG00000012017	Scarf2	8968.11	97.0002	0.0108161	4.37857e-65
ENSMUSG00000048285	Frmd6	51097.6	553.316	0.0108286	8.21892e-66
ENSMUSG00000022122	Ednrb	3697.72	44.7882	0.0121124	1.13037e-149
ENSMUSG00000022415	Syngr1	12414.9	152.975	0.0123219	0
ENSMUSG00000037624	Kcnk2	6538.49	82.9423	0.0126852	2.19507e-247
ENSMUSG00000017767	1700020C07Rik	741.206	11.419	0.015406	1.04132e-18
ENSMUSG00000039252	Lgi2	8349.44	137.218	0.0164344	4.1978e-261
ENSMUSG00000030087	Klf15	2746.95	47.4148	0.0172609	6.33992e-41
ENSMUSG00000056468	5730596B20Rik	151.229	2.62667	0.0173689	3.73679e-08
ENSMUSG00000021477	Ctsl	382821	7330.94	0.0191498	5.39639e-128
ENSMUSG00000039873	Neurl2	3871.58	75.4327	0.0194837	1.19355e-168
ENSMUSG00000025105	Bnc1	3175.8	66.6649	0.0209915	4.22313e-163
ENSMUSG00000062563	Cys1	469.035	10.5679	0.0225312	6.003e-50
ENSMUSG00000017754	Pltp	76860.2	1738.25	0.0226157	4.66702e-106
ENSMUSG00000020793	Galr2	1902.13	43.68	0.0229637	2.05986e-102
ENSMUSG00000004473	Clec11a	2088.71	50.017	0.0239463	1.42876e-92
ENSMUSG00000029844	Hoxa1	180.252	4.36555	0.0242191	1.38625e-31
ENSMUSG00000037379	Spon2	4364.41	106.72	0.0244523	1.1737e-44
ENSMUSG00000028020	Glrb	1472.67	36.2193	0.0245943	4.05138e-78
ENSMUSG00000079355	Ccrl1	8875.67	219.529	0.0247338	1.54739e-45
ENSMUSG00000031740	Mmp2	11147.2	276.465	0.0248014	1.07187e-250
ENSMUSG00000051041	Olfml1	2652.4	69.3528	0.0261472	1.86401e-77
ENSMUSG00000026574	Dpt	1150.9	30.6201	0.0266053	5.56636e-75
ENSMUSG00000021760	Gpx8	1234.44	34.5539	0.0279917	2.41567e-87
ENSMUSG00000051048	P4ha3	7241.41	203.077	0.0280439	1.51615e-158
ENSMUSG00000074743	Thbd	2026.69	57.3552	0.0283	2.56106e-104
ENSMUSG00000020424	Gatsl3	9215.68	261.458	0.028371	8.74859e-133
ENSMUSG00000037016	Frem2	15751.9	463.048	0.0293964	1.32529e-252
ENSMUSG00000078129	1700007I08Rik	44.6959	1.31946	0.0295208	9.19603e-13
ENSMUSG00000091222	Gm17723	28.9155	0.887802	0.0307034	1.46179e-08
ENSMUSG00000007805	Twist2	470.562	14.8845	0.0316313	4.14244e-23
ENSMUSG00000044349	Snhg11	16386.9	537.788	0.0328182	8.32125e-35
ENSMUSG00000030554	Synm	19261.9	660.116	0.0342706	2.59834e-242
ENSMUSG00000042351	Grap2	3912.81	134.661	0.0344155	2.18976e-142
ENSMUSG00000050623	1700019N12Rik	478.321	17.5479	0.0366865	6.84367e-46
ENSMUSG00000052713	Zfp608	3834.08	140.708	0.0366993	9.02704e-21
ENSMUSG00000032440	Tgfbr2	8676.48	322.055	0.0371182	4.76616e-204
ENSMUSG00000050520	Cldn8	1330.8	49.9925	0.0375657	1.69269e-74
ENSMUSG00000079560	Hoxa3	1316.63	49.8946	0.0378958	2.17792e-81
ENSMUSG00000019718	2810055F11Rik	358.798	13.6752	0.0381139	4.39203e-43
ENSMUSG00000057880	Abat	14399.1	559.344	0.0388457	4.71568e-218
ENSMUSG00000030701	Plekhb1	6251.09	242.845	0.0388484	2.72921e-37
ENSMUSG00000052105	1110012J17Rik	4227.61	164.678	0.0389531	3.28826e-144
ENSMUSG00000040289	Hey1	7717.06	304.645	0.0394769	5.2654e-196
ENSMUSG00000020811	Wscd1	7393.61	292.559	0.0395692	4.81664e-27
ENSMUSG00000051226	Gm9851	7436	298.008	0.0400764	1.15359e-178
ENSMUSG00000021483	Cdk20	4926.51	202.229	0.0410493	1.26389e-39
ENSMUSG00000044921	Rassf9	697.244	28.9057	0.041457	3.83643e-44
ENSMUSG00000037260	Hgsnat	20552.9	872.509	0.0424519	6.80749e-221
ENSMUSG00000020473	Aebp1	4086.49	173.881	0.0425502	7.70447e-90
ENSMUSG00000004631	Sgce	776.464	34.159	0.043993	4.33275e-57
ENSMUSG00000034522	Zfp395	5363.9	237.916	0.044355	7.02533e-164
ENSMUSG00000053441	Adamts19	836.164	37.1194	0.0443925	1.01084e-14
ENSMUSG00000000753	Serpinf1	4614.45	205.56	0.0445471	1.54036e-103
ENSMUSG00000037034	Pax1	43654	1954.95	0.0447829	2.23762e-205
ENSMUSG00000033763	Mtss1l	24852.6	1121.02	0.0451068	2.80282e-212
ENSMUSG00000064329	Scn1a	963.309	43.4932	0.0451498	3.89598e-12
ENSMUSG00000032714	Syde1	712.376	32.8396	0.0460986	5.26057e-57
ENSMUSG00000053399	Adamts18	1591.51	73.8194	0.0463831	1.34139e-32
ENSMUSG00000074415	2610203C20Rik	1366.14	63.582	0.0465415	0.00310589
ENSMUSG00000000942	Hoxa4	103.591	4.82169	0.0465457	1.00673e-20
ENSMUSG00000047842	Diras2	8927.67	419.23	0.0469585	1.84161e-149
ENSMUSG00000000305	Cdh4	26690.1	1263.13	0.0473257	2.84962e-210
ENSMUSG00000024909	Efemp2	1983.83	94.2756	0.0475221	6.73738e-22
ENSMUSG00000048728	Zfp454	63.2945	3.04609	0.0481256	4.76758e-12
ENSMUSG00000022687	Boc	7950.86	389.216	0.0489527	9.28276e-14
ENSMUSG00000053647	Gpr30	1662.43	82.2168	0.0494558	3.16092e-45
ENSMUSG00000028669	1110049F12Rik	23634.7	1173.09	0.0496339	4.76057e-44
ENSMUSG00000022464	Slc38a4	3245.53	162.483	0.0500637	1.69703e-47
ENSMUSG00000041624	Gucy1a2	2635.49	132.047	0.0501034	1.95647e-27
ENSMUSG00000050967	Creg2	832.087	42.3727	0.0509234	3.26951e-52
ENSMUSG00000039982	Dtx4	5514.71	287.122	0.0520647	3.65316e-153
ENSMUSG00000038576	Susd4	3051.78	160.781	0.0526844	2.06739e-114
ENSMUSG00000054061	Gm9934	248.47	13.1211	0.0528077	2.52923e-11
ENSMUSG00000046402	Rbp1	4035.57	213.933	0.0530118	1.55615e-59
ENSMUSG00000025911	Adhfe1	1629.73	87.9752	0.0539814	6.62402e-53
ENSMUSG00000021763	BC067074	2981.3	161.09	0.0540337	6.9428e-48
ENSMUSG00000056174	Col8a2	1888.96	102.119	0.0540609	8.25076e-77
ENSMUSG00000040432	Ltb4r2	218.275	11.8017	0.0540679	5.90264e-13
ENSMUSG00000071077	Gm9104	8.11428	0.443901	0.0547062	0.000770977
ENSMUSG00000001281	Itgb7	1906.84	104.807	0.0549636	4.64377e-80
ENSMUSG00000062760	1810041L15Rik	10935.3	601.659	0.0550198	1.65703e-179
ENSMUSG00000020261	Slc36a1	27885	1540.13	0.0552316	1.87087e-193
ENSMUSG00000002799	Jag2	16506.3	919.275	0.0556924	1.5242e-47
ENSMUSG00000001555	Fkbp10	2230.75	125.009	0.056039	3.57272e-84
ENSMUSG00000073465	Park2	7.68776	0.431657	0.0561486	0.00120808
ENSMUSG00000014704	Hoxa2	778.203	43.7534	0.0562237	5.4727e-54
ENSMUSG00000039236	Isg20	15459.7	869.426	0.0562382	3.15727e-134
ENSMUSG00000031563	Wwc2	2716.89	152.987	0.0563096	1.42792e-109
ENSMUSG00000008575	Nfib	16038.5	903.726	0.0563473	1.14648e-86
ENSMUSG00000021068	Nin	17887.1	1012.34	0.0565962	5.84369e-126
ENSMUSG00000043385	Olfr267	15.3323	0.875558	0.0571053	9.61702e-06
ENSMUSG00000079587	Gpr45	321.726	18.3745	0.0571123	1.10943e-32
ENSMUSG00000027489	Necab3	640.093	36.749	0.0574119	3.23557e-43
ENSMUSG00000045934	Mtmr11	3171.2	182.337	0.0574977	2.99066e-55
ENSMUSG00000040875	Osbpl10	5554.39	319.912	0.0575964	9.4164e-152
ENSMUSG00000030849	Fgfr2	12462.9	718.585	0.0576578	1.50918e-49
ENSMUSG00000047067	Dusp28	2421.5	141.038	0.0582442	6.60558e-20
ENSMUSG00000015396	Cd83	28759.4	1676.98	0.0583106	3.14561e-37
ENSMUSG00000058145	Adamts17	1659.18	99.0238	0.0596825	5.94366e-16
ENSMUSG00000056031	9330154J02Rik	65.1949	3.89716	0.0597771	2.43516e-14
ENSMUSG00000024085	Man2a1	37669.9	2270.1	0.0602629	4.64279e-83
ENSMUSG00000041731	Pgm5	9777.6	591.599	0.0605055	3.03486e-168
ENSMUSG00000024299	Adamts10	3549.4	215.843	0.0608112	4.37175e-110
ENSMUSG00000030088	Aldh1l1	12781.4	782.069	0.0611879	1.38864e-64
ENSMUSG00000074518	Gm10711	7.21807	0.443901	0.0614986	0.00186083
ENSMUSG00000031772	Cntnap4	766.925	47.3291	0.0617128	8.17991e-47
ENSMUSG00000033767	D930015E06Rik	91438.8	5708.67	0.0624316	1.85439e-131
ENSMUSG00000022454	Nell2	3000.61	187.541	0.0625009	5.38409e-102
ENSMUSG00000048826	Dact2	23373.5	1461.04	0.0625085	4.72034e-18
ENSMUSG00000074505	Fat3	2641.94	165.578	0.0626731	7.09011e-14
ENSMUSG00000026748	Plxdc2	6957.77	438.088	0.0629639	4.52927e-155
ENSMUSG00000044807	Zfp354c	1911.17	120.68	0.0631446	1.1771e-80
ENSMUSG00000073679	Gm10562	13.9665	0.887802	0.0635668	2.70814e-05
ENSMUSG00000091890	A830073O21Rik	234.46	14.909	0.0635885	3.09778e-19
ENSMUSG00000034854	Mfsd12	18803.3	1200.61	0.063851	1.26736e-16
ENSMUSG00000069171	Nr2f1	1215.24	77.9124	0.0641126	5.1582e-58
ENSMUSG00000030352	Tspan9	7753.39	498.973	0.0643555	2.15887e-150
ENSMUSG00000060559	Gm10083	106.263	7.0412	0.0662621	1.9671e-18
ENSMUSG00000027574	Nkain4	2034.34	135.182	0.06645	1.58451e-79
ENSMUSG00000016386	Mpped2	1368.49	90.9846	0.0664853	8.63941e-71
ENSMUSG00000051790	Nlgn2	2776.29	184.596	0.0664902	5.33574e-15
ENSMUSG00000036298	Slc2a13	9247.29	617.244	0.0667486	2.74286e-26
ENSMUSG00000023055	Calcoco1	21702.7	1456.74	0.0671222	6.86577e-173
ENSMUSG00000070858	Gm1673	546.5	37.2051	0.0680789	2.22042e-05
ENSMUSG00000038351	Sgsm2	5124.78	349.161	0.0681319	7.12637e-137
ENSMUSG00000042428	Mgat3	12161.8	833.14	0.0685046	1.23682e-57
ENSMUSG00000020234	4930404N11Rik	5635.61	386.994	0.0686693	2.39058e-13
ENSMUSG00000034732	Pabpc5	82.962	5.69725	0.068673	7.23807e-15
ENSMUSG00000038725	Pkhd1l1	19460.6	1341.86	0.0689527	4.81727e-14
ENSMUSG00000020792	Exoc7	30695.2	2118.95	0.0690319	3.03433e-167
ENSMUSG00000022178	Jub	6379.07	441.26	0.0691731	1.52963e-75
ENSMUSG00000048078	Odz4	9562.69	661.845	0.0692112	3.65536e-100
ENSMUSG00000021198	Unc79	4888.54	341.553	0.0698682	3.04456e-102
ENSMUSG00000033192	Lpcat2	3977.36	279.931	0.070381	1.33156e-36
ENSMUSG00000024143	Rhoq	4625.2	326.36	0.0705613	3.14698e-126
ENSMUSG00000090747	Gm17495	24.8773	1.76336	0.0708823	1.15076e-06
ENSMUSG00000028386	Slc46a2	26439.2	1875.19	0.0709246	3.3094e-143
ENSMUSG00000029838	Ptn	1445.83	103.304	0.0714492	3.6993e-45
ENSMUSG00000026090	2010300C02Rik	6830.42	488.552	0.071526	8.69803e-141
ENSMUSG00000026980	Ly75	57656.7	4125.83	0.0715586	1.74068e-146
ENSMUSG00000073174	Magi2	18.1721	1.30722	0.0719354	3.93112e-06
ENSMUSG00000079434	Neu2	1079.03	77.6277	0.0719422	4.22392e-37
ENSMUSG00000032318	Isl2	381.441	27.5617	0.0722569	2.24731e-34
ENSMUSG00000019539	Rcn3	2352.22	170.278	0.0723901	1.40369e-93
ENSMUSG00000063605	Ccdc102a	910.044	66.0985	0.0726322	1.47807e-46
ENSMUSG00000054679	Srsf12	693.292	50.4119	0.0727139	4.33057e-42
ENSMUSG00000002058	Unc119	3340.87	246.834	0.0738832	1.87067e-37
ENSMUSG00000089715	Cbx6	27927.6	2090.78	0.0748643	5.49922e-158
ENSMUSG00000090441	Gm17651	58.4465	4.37779	0.0749026	3.56494e-12
ENSMUSG00000040209	Zfp704	4623.49	346.978	0.0750468	5.42572e-61
ENSMUSG00000027488	Snta1	799.786	60.5604	0.0757208	8.62203e-45
ENSMUSG00000041734	Kirrel	3904.96	296.692	0.0759782	1.62455e-17
ENSMUSG00000048572	E030010A14Rik	1429.15	108.618	0.0760018	5.85484e-43
ENSMUSG00000024640	Psat1	20792.3	1582.23	0.0760968	1.09301e-160
ENSMUSG00000034685	Fam171a2	551.845	42.0146	0.0761347	2.20485e-15
ENSMUSG00000009292	Trpm2	15692.2	1195.71	0.0761978	9.23316e-159
ENSMUSG00000037211	Spry1	2026.89	154.616	0.0762821	2.80425e-57
ENSMUSG00000006567	Atp7b	4005.82	306.063	0.0764046	8.27053e-99
ENSMUSG00000014725	Adam28	1853.4	142.456	0.0768619	1.81636e-13
ENSMUSG00000034021	Pds5b	70434.6	5414.88	0.0768781	7.01564e-99
ENSMUSG00000035491	1600014K23Rik	5.74423	0.443901	0.0772777	0.00764476
ENSMUSG00000061576	Dpp6	4951.04	385.95	0.0779533	5.08765e-20
ENSMUSG00000024940	Ltbp3	13081.9	1020.25	0.0779898	3.61923e-37
ENSMUSG00000047712	Ust	2926.67	228.276	0.0779984	6.59133e-90
ENSMUSG00000061013	Mkx	678.823	53.0386	0.0781332	6.87177e-46
ENSMUSG00000029769	Ccdc136	2617.48	210.296	0.0803429	7.55003e-80
ENSMUSG00000078670	Fam174b	2269.55	183.041	0.0806505	3.28645e-58
ENSMUSG00000029153	Ociad2	9323.69	758.246	0.0813246	1.65888e-145
ENSMUSG00000024538	Ppic	4030.48	329.966	0.0818676	6.27762e-109
ENSMUSG00000036225	Kctd1	5526.54	453.432	0.0820463	4.43168e-127
ENSMUSG00000050288	Fzd2	1974.46	162.78	0.082443	2.6792e-91
ENSMUSG00000046908	Ltb4r1	338.315	27.9566	0.0826349	5.71193e-09
ENSMUSG00000075592	Nynrin	3706.11	306.843	0.082794	1.33863e-64
ENSMUSG00000022591	Gm9747	954.206	79.2564	0.08306	1.53234e-53
ENSMUSG00000039607	Rbms3	6091.45	506.431	0.0831379	3.50155e-44
ENSMUSG00000046275	Tusc5	1218.92	101.923	0.0836174	5.22225e-49
ENSMUSG00000036880	Acaa2	3301.62	276.26	0.083674	4.57041e-101
ENSMUSG00000052759	Gpr25	934.441	78.3441	0.0838406	4.0334e-24
ENSMUSG00000017764	Zswim1	4384.53	368.968	0.0841523	3.3247e-34
ENSMUSG00000091124	Gm17239	5.27454	0.443901	0.0841592	0.0127988
ENSMUSG00000054263	Lifr	22282.1	1894.33	0.0850158	6.82531e-12
ENSMUSG00000066797	Zfp648	529.808	45.0729	0.085074	1.58832e-32
ENSMUSG00000040183	Ankrd6	4198.21	357.635	0.0851875	1.1727e-60
ENSMUSG00000013089	Etv5	2970.23	253.419	0.0853197	1.18368e-89
ENSMUSG00000038552	Fndc4	251.602	21.494	0.0854288	2.78793e-22
ENSMUSG00000036036	Zfp57	894.221	77.2083	0.0863414	1.15192e-44
ENSMUSG00000038205	Prkab2	3686.59	319.306	0.086613	4.11703e-41
ENSMUSG00000042116	Vwa1	2168.7	188.557	0.0869449	8.76364e-106
ENSMUSG00000026478	Lamc1	17514.4	1535.33	0.0876606	1.7999e-119
ENSMUSG00000016918	Sulf1	13642	1198.8	0.0878756	3.55697e-73
ENSMUSG00000090206	Tepp	957.051	84.6689	0.0884685	6.75552e-45
ENSMUSG00000045659	Plekha7	10984.9	974.245	0.0886895	2.22867e-113
ENSMUSG00000028487	Bnc2	523.61	46.4658	0.0887412	3.91241e-35
ENSMUSG00000022676	Snai2	2472.93	219.805	0.0888844	1.436e-21
ENSMUSG00000036856	Wnt4	17415.4	1550.45	0.0890273	2.9566e-27
ENSMUSG00000034910	Pygo1	2219.07	198.593	0.0894936	6.12463e-81
ENSMUSG00000021127	Zfp36l1	17209.9	1540.55	0.0895156	4.35911e-17
ENSMUSG00000030510	Lass3	2378.87	215.537	0.090605	1.5044e-41
ENSMUSG00000003849	Nqo1	16411.9	1488.22	0.090679	3.59227e-142
ENSMUSG00000027634	Ndrg3	35623.5	3241.83	0.0910026	2.44785e-136
ENSMUSG00000067586	S1pr3	15718.5	1438.61	0.0915233	2.70541e-59
ENSMUSG00000027016	Zfp385b	1071.94	98.9381	0.092298	1.10481e-45
ENSMUSG00000007379	Dennd2c	4632.34	431.212	0.0930873	7.23229e-71
ENSMUSG00000047473	Zfp30	483.806	45.0484	0.0931126	7.87255e-34
ENSMUSG00000038973	Cldnd2	4.76167	0.443901	0.0932237	0.0563968
ENSMUSG00000047746	Fbxo40	434.758	40.6706	0.0935476	8.4854e-29
ENSMUSG00000078878	Gm14305	50.5481	4.78496	0.0946615	1.8055e-10
ENSMUSG00000002900	Lamb1	21559.7	2044.47	0.0948283	5.85364e-66
ENSMUSG00000043557	Mdga1	2586.37	245.6	0.0949594	8.44211e-33
ENSMUSG00000027386	Fbln7	631.017	60.141	0.095308	4.23608e-34
ENSMUSG00000014329	Bicc1	2187.54	208.9	0.0954954	1.51857e-65
ENSMUSG00000033377	Palmd	352.487	33.7029	0.0956145	7.10836e-24
ENSMUSG00000047692	4930533K18Rik	178.033	17.0428	0.095728	2.32439e-19
ENSMUSG00000043496	Tril	717.191	68.7619	0.0958767	2.69303e-20
ENSMUSG00000022665	Ccdc80	6515.66	628.201	0.096414	9.56647e-47
ENSMUSG00000043461	1110032A04Rik	1280.46	123.539	0.0964808	2.62816e-34
ENSMUSG00000049409	Prokr1	279.939	27.0933	0.0967828	5.04826e-23
ENSMUSG00000072623	Zfp9	893.552	86.619	0.0969379	6.6929e-28
ENSMUSG00000053897	Slc39a8	2861.99	277.54	0.0969745	5.99152e-78
ENSMUSG00000041308	Sntb2	4453.52	431.981	0.0969975	1.13174e-16
ENSMUSG00000038152	5033430I15Rik	179.766	17.4867	0.0972745	1.03951e-20
ENSMUSG00000019933	2310015B20Rik	211.591	20.6185	0.0974447	1.36146e-05
ENSMUSG00000055980	Irs1	2052.08	200.12	0.0975208	6.44021e-80
ENSMUSG00000013076	Amotl1	27851.9	2716.91	0.0975486	2.35691e-52
ENSMUSG00000047986	Palm3	1283.59	126.178	0.0983014	2.60074e-48
ENSMUSG00000024957	Kcnk4	196.513	19.3847	0.0986435	4.75507e-10
ENSMUSG00000070390	Nlrp1b	3810.32	376.138	0.0987156	1.22501e-09
ENSMUSG00000029330	Cds1	14179.8	1401.04	0.0988048	3.65283e-133
ENSMUSG00000018378	Cuedc1	5296.83	525.399	0.0991913	6.10221e-94
ENSMUSG00000078161	BC007180	2276.82	225.879	0.0992082	1.42479e-42
ENSMUSG00000042359	Osbpl6	4843.64	480.804	0.0992649	2.38766e-48
ENSMUSG00000057614	Gnai1	1379.2	137.414	0.099633	1.214e-54
ENSMUSG00000013419	Zfp651	2176.64	217.509	0.0999287	1.17007e-60
ENSMUSG00000018217	Pmp22	1497.36	150.128	0.100262	6.72237e-51
ENSMUSG00000050910	Cdr2l	3617.42	364.147	0.100665	1.35564e-90
ENSMUSG00000034993	Vat1	7595.92	765.311	0.100753	2.65391e-54
ENSMUSG00000007480	Mc5r	73.1633	7.41164	0.101303	1.13886e-11
ENSMUSG00000001123	Lgals9	24933.9	2545.3	0.102082	4.65132e-126
ENSMUSG00000038886	Man2a2	6546.58	668.829	0.102164	2.0011e-34
ENSMUSG00000078752	Gm12776	4.33516	0.443901	0.102396	0.0280331
ENSMUSG00000039081	Zfp503	2312.21	238.816	0.103285	3.31928e-73
ENSMUSG00000023972	Ptk7	8312.63	862.777	0.103791	6.71262e-96
ENSMUSG00000027227	Sord	6712.03	696.696	0.103798	3.85756e-110
ENSMUSG00000027314	Dll4	17634.6	1832.02	0.103888	3.93006e-48
ENSMUSG00000052512	Nav2	48737.1	5081.51	0.104264	3.46269e-24
ENSMUSG00000074140	Zfp319	1819.38	189.846	0.104346	6.55084e-61
ENSMUSG00000026594	Ralgps2	7454.62	778.258	0.104399	4.63818e-116
ENSMUSG00000028758	Kif17	511.922	53.4703	0.10445	5.027e-30
ENSMUSG00000046027	Stard5	5819.29	613.913	0.105496	1.26694e-113
ENSMUSG00000026430	Rassf5	7274.84	771.29	0.106022	1.48729e-113
ENSMUSG00000031613	Hpgd	11169.4	1187.87	0.10635	7.67008e-40
ENSMUSG00000003477	Inmt	1540.61	164.222	0.106595	2.46728e-12
ENSMUSG00000025129	Ppp1r27	2675.49	285.285	0.106629	5.90727e-68
ENSMUSG00000026187	Xrcc5	7803.8	833.764	0.106841	4.34097e-79
ENSMUSG00000071181	3830408C21Rik	20.5421	2.19502	0.106854	1.30037e-05
ENSMUSG00000025551	Fgf14	16061.4	1720.34	0.10711	1.23142e-26
ENSMUSG00000038540	Tmc3	2692.6	288.772	0.107247	7.13328e-25
ENSMUSG00000023885	Thbs2	7092.34	765.128	0.107881	9.40303e-40
ENSMUSG00000042943	4922501L14Rik	681.431	73.5836	0.107984	9.80423e-34
ENSMUSG00000032372	Plscr2	609.995	66.7138	0.109368	1.78385e-31
ENSMUSG00000029287	Tgfbr3	6740.25	740.021	0.109791	2.63923e-40
ENSMUSG00000053985	Zfp14	218.626	24.0228	0.10988	2.03837e-21
ENSMUSG00000035274	Tpbg	1910.16	209.889	0.109881	8.99468e-68
ENSMUSG00000031451	Gas6	77552.6	8537.45	0.110086	1.14896e-86
ENSMUSG00000040867	Begain	473.516	52.1998	0.110239	3.709e-29
ENSMUSG00000034751	Mast4	22271.5	2460.82	0.110492	5.12866e-24
ENSMUSG00000042340	Ctf1	1287.93	142.532	0.110668	7.0952e-51
ENSMUSG00000023411	Nfatc4	205.415	22.7768	0.110881	1.30339e-19
ENSMUSG00000090399	Nav1	213.373	23.6768	0.110964	4.19475e-21
ENSMUSG00000022816	Fstl1	14221.6	1579.25	0.111046	1.46976e-122
ENSMUSG00000052331	Ankrd44	5859.25	651.388	0.111172	2.64172e-99
ENSMUSG00000017667	Zfp334	679.746	75.6562	0.111301	4.41973e-38
ENSMUSG00000037111	Setd7	10778.1	1199.87	0.111325	4.76576e-28
ENSMUSG00000047428	Dlk2	1544.25	173.373	0.11227	1.20982e-37
ENSMUSG00000054196	Cthrc1	151.882	17.0795	0.112453	5.45627e-06
ENSMUSG00000034614	Pik3ip1	3570	403.038	0.112896	1.85528e-78
ENSMUSG00000042439	Zfp532	1384.99	156.367	0.112901	2.45113e-15
ENSMUSG00000030513	Pcsk6	2440.72	275.666	0.112945	2.26312e-66
ENSMUSG00000073176	Zfp449	851.345	96.3114	0.113129	2.81831e-38
ENSMUSG00000037463	Fbxo27	112.536	12.7384	0.113194	3.53684e-13
ENSMUSG00000063887	Nlgn1	2611.39	296.505	0.113543	5.08159e-71
ENSMUSG00000043259	Fam13c	562.13	63.9892	0.113833	3.16543e-13
ENSMUSG00000028373	Astn2	1791.7	204.176	0.113957	2.06932e-09
ENSMUSG00000032013	Trim29	24314.1	2792.1	0.114835	1.10332e-111
ENSMUSG00000031298	Gpr64	4527.1	520.054	0.114876	8.72408e-17
ENSMUSG00000024211	Grm8	656.575	75.4449	0.114907	7.23391e-31
ENSMUSG00000033720	Sfxn5	1790.06	205.79	0.114963	1.79449e-54
ENSMUSG00000009739	Pou6f1	1412.95	163.111	0.11544	3.6815e-60
ENSMUSG00000005973	Rcn1	15973.9	1849.14	0.11576	5.64284e-119
ENSMUSG00000020646	Mboat2	1081.29	125.71	0.116259	1.08872e-40
ENSMUSG00000034903	Cobll1	7036.4	821.482	0.116747	1.13708e-46
ENSMUSG00000057751	Megf6	15713.4	1834.71	0.116761	1.36722e-71
ENSMUSG00000056870	Gulp1	745.147	87.1854	0.117004	5.14419e-37
ENSMUSG00000000861	Bcl11a	2964.91	348.175	0.117432	2.25812e-61
ENSMUSG00000040219	Ttc12	1586.37	186.371	0.117483	8.0932e-54
ENSMUSG00000024593	Megf10	1242.7	146.01	0.117494	2.70048e-20
ENSMUSG00000032649	Glt25d2	660.284	78.4788	0.118856	1.49663e-14
ENSMUSG00000006931	Leprel4	945.227	112.54	0.119061	3.44814e-26
ENSMUSG00000054723	Vmac	3385.41	405.656	0.119825	3.74882e-84
ENSMUSG00000061311	Rag1	7921.98	955.836	0.120656	3.32686e-09
ENSMUSG00000027784	Ppm1l	10223.4	1233.97	0.120701	2.94836e-111
ENSMUSG00000019960	Dusp6	3230.64	392.685	0.12155	1.71465e-15
ENSMUSG00000021286	Zfyve21	4341.19	527.962	0.121617	6.58764e-90
ENSMUSG00000049576	Zfa	7.1749	0.875558	0.122031	0.00697907
ENSMUSG00000042826	Fgf11	1365.21	166.625	0.122051	3.31178e-40
ENSMUSG00000059898	Dsc3	22210.6	2711.77	0.122094	9.04435e-112
ENSMUSG00000087444	Gm5475	128.381	15.76	0.12276	5.14982e-15
ENSMUSG00000047749	Zc3hav1l	742.264	91.5509	0.12334	8.02202e-37
ENSMUSG00000049288	Lix1l	2996.5	370.23	0.123554	8.59557e-79
ENSMUSG00000042035	Igsf3	9886.76	1234.86	0.1249	4.40629e-93
ENSMUSG00000023043	Krt18	215096	26872.5	0.124933	7.72181e-46
ENSMUSG00000049532	Sall2	500.395	62.584	0.125069	4.27752e-16
ENSMUSG00000050064	Zfp697	916.869	114.882	0.125298	1.32122e-36
ENSMUSG00000055485	9830001H06Rik	3160.22	396.248	0.125386	8.25675e-58
ENSMUSG00000045636	Mtus1	2861.03	359.423	0.125627	1.23638e-70
ENSMUSG00000038668	Lpar1	5469.89	687.179	0.125629	1.3417e-66
ENSMUSG00000038738	Shank1	1603.12	201.957	0.125978	3.31723e-16
ENSMUSG00000051652	Lrrc3	980.179	123.91	0.126416	3.28716e-43
ENSMUSG00000021474	Sfxn1	7270.39	919.281	0.126442	2.17569e-99
ENSMUSG00000020376	Rnf130	2611.61	330.851	0.126684	1.78755e-72
ENSMUSG00000037086	1110059M19Rik	868.739	110.072	0.126704	6.19288e-26
ENSMUSG00000037003	Tenc1	2060.54	261.382	0.126851	2.20155e-70
ENSMUSG00000070509	Rgma	1497.74	190.269	0.127037	3.46048e-17
ENSMUSG00000043384	Gprasp1	6704.35	853.792	0.127349	8.6191e-100
ENSMUSG00000046169	Adamts6	643.144	82.03	0.127545	1.38726e-06
ENSMUSG00000020844	Nxn	15364.6	1963.97	0.127825	2.67254e-82
ENSMUSG00000031274	Col4a5	3931.22	502.586	0.127845	3.34225e-79
ENSMUSG00000001435	Col18a1	20626	2647.91	0.128377	1.13131e-107
ENSMUSG00000037892	Pcdh18	2225.93	286.571	0.128742	8.82866e-29
ENSMUSG00000020814	Mxra7	313.104	40.7073	0.130012	6.06332e-22
ENSMUSG00000032456	Nmnat3	1074.91	139.756	0.130016	2.11577e-40
ENSMUSG00000017760	Ctsa	27440.8	3574	0.130244	1.6253e-103
ENSMUSG00000032531	Amotl2	5384.24	701.267	0.130244	3.24409e-11
ENSMUSG00000021589	Rhobtb3	1693.91	220.742	0.130315	8.54195e-41
ENSMUSG00000020846	Fam101b	2031.02	264.829	0.130392	2.04339e-18
ENSMUSG00000022438	Parvb	3488.42	455.293	0.130516	1.49911e-72
ENSMUSG00000078922	Tgtp1	757.381	99.1738	0.130943	8.41705e-08
ENSMUSG00000068979	Gm5848	6.68362	0.875558	0.131001	0.0102684
ENSMUSG00000000085	Scmh1	4470.76	586.079	0.131091	5.69324e-90
ENSMUSG00000033059	Pygb	15197.6	1994.55	0.131241	2.28002e-107
ENSMUSG00000027796	Smad9	1040.76	137.055	0.131687	6.6183e-38
ENSMUSG00000053110	Yap1	10001	1317.03	0.13169	1.37896e-104
ENSMUSG00000028801	4930555I21Rik	563.393	74.349	0.131966	2.61151e-18
ENSMUSG00000061669	Gm6404	9.99304	1.31946	0.132038	0.00532586
ENSMUSG00000064326	Siva1	1162.65	153.581	0.132096	3.61623e-44
ENSMUSG00000058056	Palld	7618.53	1008.85	0.132421	2.44915e-101
ENSMUSG00000019966	Kitl	10022.2	1328.65	0.13257	5.38429e-103
ENSMUSG00000033149	Phldb2	2315.93	307.382	0.132725	9.16045e-26
ENSMUSG00000038128	Camk4	17367.8	2308.87	0.13294	2.3725e-47
ENSMUSG00000024900	Cpt1a	22451.8	2998.17	0.133538	3.47063e-104
ENSMUSG00000039883	Lrrc17	2309.03	308.745	0.133712	2.02522e-71
ENSMUSG00000078144	Capns2	293.258	39.4001	0.134353	5.68161e-08
ENSMUSG00000000253	Gmpr	6369.18	858.344	0.134765	2.00818e-53
ENSMUSG00000024353	2010001M09Rik	87.1729	11.8139	0.135523	2.01007e-11
ENSMUSG00000019831	Wasf1	756.225	102.697	0.135803	5.7487e-32
ENSMUSG00000032827	Ppp1r9a	2229.03	303.497	0.136157	8.54561e-18
ENSMUSG00000075324	Fign	257.092	35.108	0.136558	2.63916e-18
ENSMUSG00000030737	Slco2b1	4588.03	628.241	0.13693	2.18088e-76
ENSMUSG00000022947	Cbr3	1244.58	170.807	0.137241	1.02244e-45
ENSMUSG00000018537	Pcgf2	4406.65	606.823	0.137706	4.7724e-68
ENSMUSG00000025038	Efhc2	266.291	36.7	0.137819	5.18688e-19
ENSMUSG00000029312	Klhl8	3241.55	446.945	0.13788	3.80415e-75
ENSMUSG00000022912	Pros1	3926.51	541.643	0.137945	3.28675e-69
ENSMUSG00000003541	Ier3	3911.89	544.854	0.139282	6.29389e-07
ENSMUSG00000027955	Fam198b	688.622	95.9287	0.139305	2.19579e-29
ENSMUSG00000018672	Copz2	3893.59	542.849	0.139421	3.11002e-84
ENSMUSG00000044461	Shisa2	11000.9	1538.91	0.139889	7.72609e-101
ENSMUSG00000028402	Mpdz	2466.11	346.155	0.140365	1.18926e-54
ENSMUSG00000033855	Ston1	354.28	49.8701	0.140765	4.55832e-21
ENSMUSG00000038248	Sobp	414.178	58.3165	0.1408	2.55901e-08
ENSMUSG00000021448	Shc3	445.863	63.1137	0.141554	1.05331e-22
ENSMUSG00000030555	Ttc23	3709.29	525.213	0.141594	2.98122e-82
ENSMUSG00000041120	Nbl1	2102.22	297.714	0.141619	1.00672e-37
ENSMUSG00000023235	Ccl25	104276	14776	0.141701	1.2769e-31
ENSMUSG00000031290	Lrch2	2850.98	406.357	0.142532	4.67302e-47
ENSMUSG00000040998	Npnt	12615.4	1806.81	0.143223	2.86309e-99
ENSMUSG00000005696	Sh2d1a	260.774	37.4255	0.143517	0.000205453
ENSMUSG00000034310	Tmem132d	362.54	52.1998	0.143984	6.99245e-21
ENSMUSG00000046897	Zfp740	9470.26	1365.2	0.144157	4.95792e-97
ENSMUSG00000069601	Ank3	26744.1	3855.53	0.144164	2.31768e-94
ENSMUSG00000015476	Prrt1	243.757	35.1448	0.14418	0.00023265
ENSMUSG00000071771	Rhox4b	39.4861	5.69725	0.144285	4.91808e-07
ENSMUSG00000075318	Scn2a1	380.129	54.8999	0.144425	2.52185e-22
ENSMUSG00000030060	8430410A17Rik	1238.48	179.652	0.145058	3.41913e-45
ENSMUSG00000036545	Adamts2	5565.44	808.269	0.14523	4.76791e-85
ENSMUSG00000058441	Panx2	15.0138	2.18277	0.145385	0.000288089
ENSMUSG00000007989	Fzd3	1125.85	163.705	0.145405	5.53237e-39
ENSMUSG00000025887	Casp12	1406.37	205.744	0.146294	1.42606e-19
ENSMUSG00000022378	Fam49b	10894.3	1604.9	0.147316	4.32017e-14
ENSMUSG00000009418	Nav1	9005.07	1327.33	0.147398	4.31879e-34
ENSMUSG00000048756	Foxo3	12581.8	1858.57	0.147719	1.64251e-96
ENSMUSG00000020142	Slc1a4	3901.22	576.662	0.147816	1.13155e-18
ENSMUSG00000063160	Numbl	629.144	93.1061	0.147989	9.85194e-32
ENSMUSG00000030047	Arhgap25	805.164	119.618	0.148563	3.39569e-33
ENSMUSG00000020160	Meis1	6368.94	948.214	0.148881	4.76142e-36
ENSMUSG00000056214	Pard6g	10031.8	1495.99	0.149125	8.29215e-95
ENSMUSG00000025555	Farp1	9521.65	1423.71	0.149523	2.42286e-93
ENSMUSG00000045318	Adra2c	542.716	81.8096	0.150741	5.8966e-23
ENSMUSG00000021238	Aldh6a1	3521.61	533.353	0.151452	6.31934e-49
ENSMUSG00000033581	Igf2bp2	1759.25	266.972	0.151753	3.03604e-46
ENSMUSG00000016982	Pom121l2	63.5104	9.64338	0.151839	5.30584e-09
ENSMUSG00000001521	Tulp3	12194.1	1854.96	0.15212	7.99734e-94
ENSMUSG00000029913	Prdm5	367.723	55.95	0.152153	4.49624e-23
ENSMUSG00000022206	Npr3	355.705	54.2234	0.152439	1.75168e-19
ENSMUSG00000000794	Kcnn3	1955.8	298.455	0.1526	1.99805e-53
ENSMUSG00000020150	Gamt	134.639	20.5817	0.152867	6.6097e-15
ENSMUSG00000037605	Lphn3	1437.77	219.976	0.152998	2.9646e-47
ENSMUSG00000002059	Rab34	2393.48	368.353	0.153899	1.33001e-60
ENSMUSG00000061048	Cdh3	7997.8	1232.03	0.154047	2.35382e-73
ENSMUSG00000005054	Cstb	57496.8	8875.96	0.154373	3.9494e-71
ENSMUSG00000053044	Cd8b1	1243.26	191.986	0.154421	0.000704607
ENSMUSG00000028179	Cth	4660.79	721.007	0.154696	1.49619e-68
ENSMUSG00000041633	Kctd12b	908.199	140.619	0.154833	6.03107e-21
ENSMUSG00000048376	F2r	2798.85	433.438	0.154863	1.49103e-62
ENSMUSG00000027316	Gfra4	1006.17	156.774	0.155813	1.64322e-47
ENSMUSG00000000290	Itgb2	2038.74	318.1	0.156028	3.78788e-45
ENSMUSG00000057060	Slc35f3	296.367	46.3679	0.156454	9.71782e-17
ENSMUSG00000021482	1110018J18Rik	3657.57	573.356	0.156759	3.81508e-72
ENSMUSG00000084085	Gm16140	16.7414	2.62667	0.156897	0.000261583
ENSMUSG00000029070	Mxra8	418.049	65.8016	0.157402	4.67288e-22
ENSMUSG00000034813	Grip1	1499.47	236.079	0.157442	4.87517e-15
ENSMUSG00000040841	Six5	908.911	143.135	0.15748	3.58356e-32
ENSMUSG00000031328	Flna	82579.9	13061.3	0.158166	2.97577e-43
ENSMUSG00000058297	Spock2	32165.1	5089.11	0.158218	1.49296e-84
ENSMUSG00000042156	Dzip1	1928.13	305.545	0.158467	7.68888e-52
ENSMUSG00000024423	Impact	8390.46	1329.65	0.158471	1.57663e-86
ENSMUSG00000062115	Rai1	4116.36	653.558	0.158771	3.81311e-53
ENSMUSG00000062604	Srpk2	11703.3	1863.7	0.159246	1.24e-89
ENSMUSG00000034761	Map4k5	5105.61	814.119	0.159456	1.48583e-24
ENSMUSG00000022309	Angpt1	1651.17	263.84	0.15979	3.1003e-46
ENSMUSG00000021665	Hexb	14068.4	2250.63	0.159978	2.78925e-77
ENSMUSG00000090843	Gm17673	27.2905	4.37779	0.160414	2.14133e-05
ENSMUSG00000046879	Irgm1	12247.6	1965.58	0.160487	0.00969659
ENSMUSG00000022475	Hdac7	7136.77	1148.03	0.160861	1.051e-60
ENSMUSG00000036510	Cdh8	6210.23	1003.56	0.161598	7.24486e-57
ENSMUSG00000031749	St3gal2	2286.83	370.655	0.162083	2.8487e-31
ENSMUSG00000069729	Arid1b	19161.9	3113.66	0.162492	2.95652e-87
ENSMUSG00000024924	Vldlr	1693.21	275.675	0.162812	1.16277e-50
ENSMUSG00000029204	Rhoh	495.202	80.7718	0.163109	8.42702e-22
ENSMUSG00000023030	Slc11a2	5953.47	973.165	0.163462	2.33457e-78
ENSMUSG00000046733	Gprc5a	1063.52	174.003	0.16361	1.94294e-31
ENSMUSG00000024134	Six2	4930.59	807.39	0.163751	6.39066e-68
ENSMUSG00000022637	Cblb	2087.63	342.245	0.163939	5.20719e-16
ENSMUSG00000052085	Dock8	7524.28	1234.73	0.1641	5.53085e-81
ENSMUSG00000031714	Gab1	6690.76	1098.46	0.164176	1.31225e-38
ENSMUSG00000032194	Kank2	4650.82	763.674	0.164202	1.60594e-53
ENSMUSG00000054893	Zfp667	437.037	71.808	0.164307	4.15046e-15
ENSMUSG00000026657	Frmd4a	8628.91	1420.42	0.164611	2.72068e-40
ENSMUSG00000003534	Ddr1	14871.4	2448.84	0.164667	4.60141e-65
ENSMUSG00000053080	2700081O15Rik	5657.72	935.154	0.165288	4.63091e-47
ENSMUSG00000053644	Aldh7a1	6477.1	1071.66	0.165454	2.7014e-80
ENSMUSG00000024087	Cyp1b1	2886.89	477.798	0.165506	3.53461e-49
ENSMUSG00000048701	Ccdc6	15555.8	2579.57	0.165827	7.92582e-87
ENSMUSG00000037206	Islr	960.566	159.315	0.165855	1.03278e-27
ENSMUSG00000048677	Tpcn2	4037.76	672.735	0.166611	2.11725e-57
ENSMUSG00000051343	Rab11fip5	3488.43	581.423	0.166672	2.30611e-64
ENSMUSG00000039057	Myo16	2776.37	462.751	0.166675	6.90246e-51
ENSMUSG00000059479	B3gnt8	136.717	22.8135	0.166867	4.59171e-13
ENSMUSG00000032864	Rag2	215.77	36.0203	0.166938	1.89369e-15
ENSMUSG00000038648	Creb3l2	13461.9	2248.57	0.167032	5.14808e-86
ENSMUSG00000020335	Zfp354b	59.9635	10.0261	0.167203	1.01641e-08
ENSMUSG00000037410	Tbc1d2b	15786	2642.88	0.167419	7.71351e-86
ENSMUSG00000038903	Ccdc68	582.985	97.6309	0.167467	2.70029e-24
ENSMUSG00000027932	Slc27a3	1748.86	294.371	0.168322	1.59271e-11
ENSMUSG00000028037	Ifi44	4344.64	731.602	0.168392	2.02951e-09
ENSMUSG00000020315	Spnb2	47747.4	8069.52	0.169004	1.81365e-57
ENSMUSG00000073681	1500002C15Rik	25.7087	4.3533	0.169332	0.0109568
ENSMUSG00000010660	Plcd1	3468.4	587.956	0.169518	5.61457e-62
ENSMUSG00000035069	Oma1	9542.19	1617.58	0.169519	1.59701e-83
ENSMUSG00000028385	Snx30	10354.3	1755.61	0.169554	8.16446e-55
ENSMUSG00000030782	Tgfb1i1	961.343	163.188	0.169749	1.3394e-46
ENSMUSG00000004105	Angptl2	8214.64	1398.41	0.170234	3.18295e-83
ENSMUSG00000031937	2200002K05Rik	284.831	48.5139	0.170325	6.482e-17
ENSMUSG00000058447	Zfp82	267.733	45.6025	0.170328	9.56272e-15
ENSMUSG00000037636	Slc25a43	217.865	37.1194	0.170378	7.37673e-16
ENSMUSG00000038074	Fkbp14	649.163	110.703	0.170532	2.00694e-24
ENSMUSG00000053477	Tcf4	10314.2	1766.4	0.171259	1.85193e-59
ENSMUSG00000042680	Fam59a	1206.58	206.791	0.171386	1.3171e-20
ENSMUSG00000021318	Gli3	4497.1	770.755	0.171389	8.3397e-16
ENSMUSG00000022758	P2rx6	541.285	92.8459	0.171529	2.38586e-14
ENSMUSG00000020096	Tbata	86649.6	14890.9	0.171852	1.63333e-54
ENSMUSG00000048794	Ccdc37	244.508	42.0268	0.171883	3.22925e-11
ENSMUSG00000021959	Lats2	1668.35	286.898	0.171965	2.25007e-30
ENSMUSG00000073988	Ttpa	166.923	28.9791	0.173608	2.57694e-07
ENSMUSG00000029781	Fkbp9	8088.51	1404.77	0.173675	6.7493e-80
ENSMUSG00000026639	Lamb3	10159	1766.16	0.173852	3.04445e-18
ENSMUSG00000062929	Cfl2	6290.35	1094.02	0.17392	1.60064e-74
ENSMUSG00000060961	Slc4a4	4684.66	815.181	0.174011	3.85961e-23
ENSMUSG00000052957	Gas1	1095.88	190.786	0.174094	6.00169e-05
ENSMUSG00000026131	Dst	61283.3	10697.5	0.174559	1.86374e-23
ENSMUSG00000044033	Ccdc141	2949.04	515.493	0.1748	1.38394e-14
ENSMUSG00000090919	Pabpc4l	575.956	100.799	0.175012	1.70536e-25
ENSMUSG00000060548	Tnfrsf19	2059.2	360.608	0.17512	7.11296e-45
ENSMUSG00000079639	Rhox4a	294.737	51.6457	0.175226	2.5452e-17
ENSMUSG00000046480	Scn4b	6207.62	1088.15	0.175293	2.02222e-44
ENSMUSG00000047976	Kcna1	1309.91	229.705	0.17536	7.35139e-35
ENSMUSG00000038058	Nod1	400.563	70.3906	0.175729	1.64517e-07
ENSMUSG00000090290	Gm17296	1956.14	343.957	0.175835	1.33143e-43
ENSMUSG00000040329	Il7	12087.7	2126.28	0.175905	1.00861e-81
ENSMUSG00000004891	Nes	3596.08	633.142	0.176064	2.75097e-58
ENSMUSG00000025036	Sfxn2	2196.64	387.539	0.176423	4.03448e-49
ENSMUSG00000040296	Ddx58	7609.38	1342.56	0.176435	1.11398e-13
ENSMUSG00000062175	Tgif2	2801.67	495.762	0.176952	1.84813e-44
ENSMUSG00000028024	Enpep	8129.36	1439.59	0.177085	1.65675e-73
ENSMUSG00000043300	B3galnt1	1271.52	225.205	0.177115	1.31225e-38
ENSMUSG00000063760	Rnf217	629.031	111.493	0.177246	9.72631e-27
ENSMUSG00000038884	A230050P20Rik	3446.99	612.594	0.177719	4.6778e-22
ENSMUSG00000047344	Lancl3	485.22	86.2609	0.177777	9.78341e-24
ENSMUSG00000030339	Ltbr	7008.06	1249.62	0.178312	4.16319e-23
ENSMUSG00000020122	Egfr	10060.2	1796	0.178525	5.0066e-67
ENSMUSG00000029162	Khk	604.31	108.076	0.178843	1.01696e-25
ENSMUSG00000036459	Wtip	759.496	136.278	0.179432	6.61638e-19
ENSMUSG00000017734	Dbndd2	2201.94	395.174	0.179466	1.13207e-49
ENSMUSG00000003545	Fosb	31807.6	5715.3	0.179683	0.0829011
ENSMUSG00000048232	Fbxo10	6559.9	1179.81	0.179852	1.24534e-75
ENSMUSG00000051098	Mblac2	1235.07	222.588	0.180223	1.19924e-33
ENSMUSG00000021756	Il6st	10964	1983.93	0.18095	2.73249e-17
ENSMUSG00000020620	Abca8b	378.952	68.5905	0.181001	1.968e-12
ENSMUSG00000031661	Nkd1	551.311	99.8381	0.181092	9.70972e-23
ENSMUSG00000038271	Iffo1	1242.44	225.092	0.18117	2.68309e-40
ENSMUSG00000026004	1110028C15Rik	3596.52	651.868	0.18125	1.56611e-17
ENSMUSG00000059305	Vpreb1	9.6097	1.75112	0.182224	0.00614762
ENSMUSG00000031503	Col4a2	31278.8	5703.93	0.182358	1.32023e-43
ENSMUSG00000032035	Ets1	4081.65	747.396	0.183111	1.25821e-35
ENSMUSG00000058173	BC017612	1238.83	227.165	0.18337	3.87819e-32
ENSMUSG00000081769	Gm12216	675.023	123.934	0.1836	8.62576e-26
ENSMUSG00000048481	Mypop	924.539	169.944	0.183815	9.02501e-15
ENSMUSG00000034881	Tbxa2r	100.411	18.4602	0.183847	4.10561e-10
ENSMUSG00000053113	Socs3	18510.5	3408.28	0.184127	0.000371849
ENSMUSG00000021493	Pdlim7	2713.02	499.598	0.184148	3.68047e-59
ENSMUSG00000071770	Rhox4e	9.56653	1.76336	0.184326	0.00683801
ENSMUSG00000022793	B4galt4	733.82	135.614	0.184805	1.57558e-26
ENSMUSG00000017314	Mpp2	1481.06	273.936	0.18496	1.64697e-32
ENSMUSG00000040181	Fmo1	11793.3	2181.35	0.184964	9.26131e-59
ENSMUSG00000041117	Ccdc8	5799.96	1073.81	0.18514	5.68891e-53
ENSMUSG00000029205	Chrna9	972.41	180.044	0.185152	1.03111e-30
ENSMUSG00000001761	Smo	4985.07	923.041	0.185161	1.32916e-69
ENSMUSG00000050592	Fam78a	385.451	71.4988	0.185494	0.000927962
ENSMUSG00000017737	Mmp9	19237	3568.65	0.18551	3.35952e-75
ENSMUSG00000037580	Gch1	3106.6	576.573	0.185596	3.01204e-53
ENSMUSG00000024601	Isoc1	5048.45	938.975	0.185993	7.04497e-66
ENSMUSG00000022510	Trp63	18648.3	3471.8	0.186172	1.10458e-64
ENSMUSG00000038526	Car14	583.412	108.704	0.186325	1.18264e-21
ENSMUSG00000053977	Cd8a	2469.92	460.703	0.186525	0.000167517
ENSMUSG00000038013	Wipf2	7267.02	1356.82	0.186709	3.01941e-73
ENSMUSG00000036256	Igfbp7	843.97	157.747	0.186911	1.11317e-24
ENSMUSG00000030275	Etnk1	17931.4	3357.1	0.187219	9.85585e-24
ENSMUSG00000032093	Cd3e	547.342	102.584	0.187422	0.000102005
ENSMUSG00000052479	A330008L17Rik	403.916	75.8644	0.187822	7.33106e-17
ENSMUSG00000051236	Msrb3	2951.11	554.458	0.187881	6.37933e-59
ENSMUSG00000003559	As3mt	2047.84	385.246	0.188123	8.53955e-49
ENSMUSG00000027408	Cpxm1	1704.66	321.805	0.188779	2.52714e-37
ENSMUSG00000078349	AW011738	658.934	124.602	0.189096	1.47973e-17
ENSMUSG00000078235	Fam43b	168.942	31.964	0.189201	5.93029e-12
ENSMUSG00000056758	Hmga2	154.711	29.2761	0.189231	2.01306e-10
ENSMUSG00000025268	Maged2	5289.31	1000.93	0.189236	4.55116e-67
ENSMUSG00000038141	Tmem181a	742.258	140.806	0.189699	5.90638e-25
ENSMUSG00000026012	Cd28	717.84	136.189	0.189721	2.40696e-24
ENSMUSG00000055538	Zcchc24	1039.1	197.457	0.190028	6.42057e-10
ENSMUSG00000027160	Ccdc34	3477.89	662.048	0.190359	4.66298e-56
ENSMUSG00000038630	Zkscan16	59.9635	11.419	0.190432	9.76348e-08
ENSMUSG00000041773	Enc1	6651.8	1267.43	0.190539	2.64147e-52
ENSMUSG00000071073	Gm88	353.745	67.4425	0.190653	9.91792e-18
ENSMUSG00000037148	Arhgap10	2154.97	411.016	0.19073	1.44626e-50
ENSMUSG00000030742	Lat	1183.98	226.099	0.190965	0.00017452
ENSMUSG00000024942	Capn1	16833.2	3232.56	0.192035	1.19152e-73
ENSMUSG00000014773	Dll1	2086.57	401.128	0.192243	1.49692e-34
ENSMUSG00000055612	Cdca7	1549.28	297.984	0.192337	1.56497e-18
ENSMUSG00000001911	Nfix	16499.3	3174.18	0.192383	1.03695e-73
ENSMUSG00000042200	Cdrt4	22.5504	4.34106	0.192505	0.000212113
ENSMUSG00000037295	Ldlrap1	5151.8	992.17	0.192587	2.59999e-67
ENSMUSG00000045826	Ptprcap	268.569	51.7804	0.192801	4.7212e-05
ENSMUSG00000024534	Sncaip	709.936	136.884	0.192812	5.23211e-16
ENSMUSG00000024600	Slc27a6	316.737	61.2401	0.193347	7.71655e-17
ENSMUSG00000000325	Arvcf	3849.69	746.493	0.19391	2.67439e-60
ENSMUSG00000089736	Gm14378	241.625	46.873	0.193991	2.38966e-08
ENSMUSG00000049321	Zfp2	234.093	45.5168	0.194439	1.44341e-15
ENSMUSG00000091526	Gm6494	31.3071	6.09218	0.194594	2.80247e-05
ENSMUSG00000048772	Tmem53	645.518	125.75	0.194804	6.30752e-24
ENSMUSG00000054364	Rhob	18395.8	3590.14	0.19516	5.6898e-24
ENSMUSG00000033590	Myo5c	2097.87	410.364	0.19561	1.18953e-39
ENSMUSG00000051817	Sox12	965.403	189.023	0.195797	5.66848e-31
ENSMUSG00000035245	A130022J15Rik	4398.01	861.853	0.195964	3.41432e-64
ENSMUSG00000032402	Smad3	6149.21	1208.24	0.196487	2.13921e-68
ENSMUSG00000026000	Lancl1	9538.73	1882.02	0.197304	3.33442e-71
ENSMUSG00000029103	Lrpap1	9530.26	1882.5	0.197529	2.85867e-71
ENSMUSG00000018417	Myo1b	8467.9	1677.97	0.198157	1.92448e-71
ENSMUSG00000029270	Fam69a	4078.41	808.502	0.198239	1.24823e-58
ENSMUSG00000063455	D630045J12Rik	1120.5	222.245	0.198344	1.25753e-30
ENSMUSG00000027748	Trpc4	103.866	20.6307	0.198628	1.61511e-05
ENSMUSG00000057329	Bcl2	4383.51	871.343	0.198777	1.85361e-63
ENSMUSG00000021265	Slc25a29	1111.55	221.085	0.198897	7.94735e-15
ENSMUSG00000039481	Nrtn	604.812	120.383	0.199042	2.57094e-12
ENSMUSG00000035392	Dennd1a	3091.71	615.677	0.199138	9.55365e-54
ENSMUSG00000060487	Samd5	778.052	155.011	0.199229	8.85157e-23
ENSMUSG00000029860	Zyx	5353.4	1067.05	0.199322	3.34285e-67
ENSMUSG00000028776	Tinagl1	7063.84	1408.54	0.199402	1.84842e-25
ENSMUSG00000020042	Btbd11	16361.4	3263.58	0.199468	1.07661e-69
ENSMUSG00000032925	Itgbl1	1604.88	320.145	0.199482	8.39918e-16
ENSMUSG00000005628	Tmod4	244.983	49.0068	0.200042	1.34007e-14
ENSMUSG00000020483	Dynll2	21182.7	4240.33	0.200179	2.21115e-68
ENSMUSG00000038046	Rnmtl1	851.587	170.526	0.200245	8.5287e-26
ENSMUSG00000049295	Zfp219	5272.56	1059.15	0.20088	2.4586e-25
ENSMUSG00000028496	Mllt3	896.132	180.044	0.200912	7.49463e-29
ENSMUSG00000079699	Gm6592	4.29198	0.863314	0.201146	0.0870482
ENSMUSG00000038065	2410066E13Rik	800.721	161.188	0.201304	1.41123e-25
ENSMUSG00000003227	Edar	1277.19	257.751	0.20181	2.95256e-35
ENSMUSG00000070436	Serpinh1	9567.56	1930.91	0.201818	4.99957e-70
ENSMUSG00000078879	Gm14306	4.33516	0.875558	0.201967	0.0907908
ENSMUSG00000020284	1810043G02Rik	1658.3	335.192	0.202129	8.57283e-19
ENSMUSG00000022364	Wdr67	2639.43	534.657	0.202566	1.12049e-47
ENSMUSG00000035293	G2e3	1128.13	228.692	0.202719	1.45434e-15
ENSMUSG00000040483	Xaf1	2450.77	497.467	0.202984	1.41702e-14
ENSMUSG00000054072	Iigp1	14391.3	2924.47	0.203212	0.00856986
ENSMUSG00000023968	Crip3	36078.5	7340.05	0.203447	1.2018e-46
ENSMUSG00000002808	Epdr1	1002.25	203.996	0.203538	1.93671e-27
ENSMUSG00000046743	Fat4	2779.79	565.834	0.203553	1.91062e-24
ENSMUSG00000079671	2610203C22Rik	98.8936	20.1378	0.203631	1.32464e-09
ENSMUSG00000040857	Erf	1428.2	291.463	0.204078	2.11266e-15
ENSMUSG00000047767	Atg16l2	1847.56	377.289	0.20421	9.55964e-42
ENSMUSG00000001995	Sipa1l2	8463.55	1731.29	0.204558	2.4358e-67
ENSMUSG00000029669	Tspan12	1229.97	251.852	0.204763	3.18536e-31
ENSMUSG00000023008	Fmnl3	4933.3	1014.9	0.205725	7.86014e-60
ENSMUSG00000078939	Gm11016	125.094	25.7984	0.206232	2.76856e-11
ENSMUSG00000062373	Tmem65	4759.22	982.707	0.206485	1.39288e-60
ENSMUSG00000000811	Txnrd3	6372.99	1316.68	0.206603	3.30821e-65
ENSMUSG00000047821	Trim16	762.271	157.576	0.206719	4.65485e-22
ENSMUSG00000072949	Acot1	1201.49	248.45	0.206785	3.66643e-30
ENSMUSG00000023094	Msrb2	264.396	54.7163	0.206948	1.15985e-14
ENSMUSG00000049109	Themis	1127.07	233.296	0.206994	2.13407e-07
ENSMUSG00000016534	Lamp2	65163.4	13501.2	0.207191	6.15038e-49
ENSMUSG00000046618	Olfml2a	6739.32	1397.36	0.207344	2.37865e-47
ENSMUSG00000074220	Zfp382	514.001	106.634	0.20746	1.68531e-15
ENSMUSG00000073600	Gm1614	301.129	62.5596	0.20775	5.6153e-16
ENSMUSG00000080727	C920021L13Rik	257.448	53.4948	0.207788	1.82665e-14
ENSMUSG00000046556	Zfp319	2990.63	621.548	0.207832	6.6148e-52
ENSMUSG00000023942	Slc29a1	10144.1	2109.21	0.207924	3.87071e-51
ENSMUSG00000028545	Bend5	582.273	121.173	0.208103	2.51332e-22
ENSMUSG00000038894	Irs2	6174.74	1285.22	0.208142	5.20627e-14
ENSMUSG00000046109	AB041806	54.3704	11.321	0.208221	1.08972e-06
ENSMUSG00000024944	Arl2	1305.18	271.769	0.208223	3.86234e-34
ENSMUSG00000033565	Rbfox2	10814.1	2253.44	0.208379	5.10749e-68
ENSMUSG00000092443	CT009512.1	131.847	27.5127	0.208671	1.24632e-10
ENSMUSG00000031327	Chic1	940.424	196.247	0.20868	2.19416e-20
ENSMUSG00000058756	Thra	2034.27	424.964	0.208903	1.57102e-42
ENSMUSG00000020868	Xylt2	1169.29	244.455	0.209063	1.84525e-21
ENSMUSG00000029426	Scarb2	7722.72	1616.12	0.209268	1.3673e-66
ENSMUSG00000056296	Synpr	687.324	144.069	0.209609	0.0966493
ENSMUSG00000062157	Il28ra	503.868	105.658	0.209694	0.00970968
ENSMUSG00000040649	Rimklb	2062.37	433.065	0.209984	2.90261e-05
ENSMUSG00000038543	BC028528	561.05	117.854	0.21006	1.69612e-20
ENSMUSG00000027173	Depdc7	617.98	129.916	0.210227	7.42799e-19
ENSMUSG00000037712	Fermt2	5574.55	1172.35	0.210304	3.60393e-43
ENSMUSG00000063704	Mapk15	786.025	165.444	0.210482	1.15967e-15
ENSMUSG00000043614	Vps37d	422.708	88.9732	0.210484	2.92408e-17
ENSMUSG00000029314	Agpat9	701.4	147.675	0.210544	3.76669e-22
ENSMUSG00000031861	Lpar2	451.381	95.0777	0.210637	2.44078e-19
ENSMUSG00000024525	Impa2	692.52	146.074	0.210932	1.65799e-22
ENSMUSG00000055435	Maf	7395.4	1561.05	0.211084	3.43949e-64
ENSMUSG00000035283	Adrb1	352.152	74.3735	0.211197	9.26858e-14
ENSMUSG00000079694	Gm14862	28.7859	6.07993	0.211212	5.42416e-05
ENSMUSG00000042046	Dstyk	4111.57	870.648	0.211755	4.08669e-57
ENSMUSG00000025260	Hsd17b10	3199.97	677.994	0.211875	6.50099e-52
ENSMUSG00000067818	Myl9	690.295	146.295	0.211931	1.06801e-23
ENSMUSG00000023044	Csad	3176.01	674.869	0.21249	7.07688e-53
ENSMUSG00000047988	4933428G20Rik	179.34	38.1296	0.212611	1.8474e-13
ENSMUSG00000051036	Ttc24	382.401	81.3535	0.212744	6.04892e-08
ENSMUSG00000042099	Kank3	945.428	201.256	0.212873	4.76125e-25
ENSMUSG00000022836	Mylk	8602.28	1831.88	0.212953	2.08826e-39
ENSMUSG00000017765	Slc12a4	4184.97	894.071	0.213639	2.36563e-36
ENSMUSG00000018377	Vezf1	8106.79	1736.14	0.214159	2.34772e-56
ENSMUSG00000035357	Pdzrn3	1626.56	348.794	0.214437	2.40165e-15
ENSMUSG00000054863	Fam19a5	1039.11	223.194	0.214793	7.80719e-27
ENSMUSG00000026189	Pecr	844.077	181.375	0.21488	2.19198e-24
ENSMUSG00000031851	Ntpcr	652.942	140.374	0.214987	2.0386e-23
ENSMUSG00000029185	Fam114a1	2188.84	470.903	0.215138	6.90742e-44
ENSMUSG00000041596	Vmn1r90	20.1588	4.3533	0.215951	0.00049906
ENSMUSG00000036832	Lpar3	803.533	173.988	0.216529	2.2194e-21
ENSMUSG00000016495	5033414D02Rik	11448.2	2481.5	0.216759	6.28086e-65
ENSMUSG00000022951	Rcan1	5808.4	1259.2	0.21679	2.8496e-20
ENSMUSG00000048490	Nrip1	5407.3	1172.67	0.216867	1.00997e-44
ENSMUSG00000032094	Cd3d	665.768	144.44	0.216952	0.00155405
ENSMUSG00000040007	Bahd1	9248.07	2009.44	0.217282	2.36192e-64
ENSMUSG00000019917	Sept10	2790.08	607.42	0.217707	3.16821e-25
ENSMUSG00000037643	Prkci	9554	2082.34	0.217955	3.90647e-64
ENSMUSG00000022120	Rnf219	1654.09	362.925	0.21941	4.25928e-35
ENSMUSG00000061731	Ext1	2859.16	627.803	0.219576	2.1205e-48
ENSMUSG00000039345	Mettl22	356.849	78.4665	0.219887	9.68191e-13
ENSMUSG00000021209	Ppp4r4	768.264	169.007	0.219986	2.16068e-15
ENSMUSG00000028532	Cachd1	6429.74	1414.53	0.219997	5.10017e-21
ENSMUSG00000078169	Gm16499	15.91	3.50223	0.220128	0.00208864
ENSMUSG00000054889	Dsp	147537	32484.4	0.220178	9.20877e-29
ENSMUSG00000023348	Trip6	2379.71	524.374	0.220352	2.04161e-46
ENSMUSG00000050323	2310030N02Rik	605.584	134.135	0.221497	5.52375e-20
ENSMUSG00000039309	Edaradd	1432.46	317.702	0.221788	1.10161e-35
ENSMUSG00000042258	Isl1	2777.72	617.856	0.222433	3.17639e-18
ENSMUSG00000038502	Ptov1	9752.68	2169.92	0.222495	9.69154e-45
ENSMUSG00000033306	Lpp	13452.5	2993.89	0.222552	5.72914e-24
ENSMUSG00000030340	Scnn1a	11826	2633.9	0.222721	5.16622e-63
ENSMUSG00000079662	Ntn3	80.6783	17.9796	0.222855	2.19532e-08
ENSMUSG00000032788	Pdxk	5635.17	1259.53	0.223513	8.64338e-57
ENSMUSG00000059049	Frem1	334.472	74.7684	0.223542	1.20704e-13
ENSMUSG00000001750	Tcirg1	4079.39	914.756	0.224239	7.99705e-18
ENSMUSG00000042712	Wbp5	4536.45	1018.24	0.224458	3.13957e-19
ENSMUSG00000016496	Cd274	29498.2	6622.15	0.224494	0.0563233
ENSMUSG00000029201	Ugdh	8198.73	1846	0.225157	2.59821e-60
ENSMUSG00000022099	Epb4.9	1760.44	396.591	0.225279	2.45676e-36
ENSMUSG00000038387	Rras	2824.15	636.849	0.225501	4.07771e-50
ENSMUSG00000042961	Egflam	5336.73	1204.24	0.22565	4.5903e-54
ENSMUSG00000039959	Hip1	1082.6	244.37	0.225724	6.31222e-10
ENSMUSG00000060166	Zdhhc8	3541.8	801.962	0.226428	1.81446e-29
ENSMUSG00000045877	4933415A04Rik	246.818	55.9378	0.226635	8.09136e-13
ENSMUSG00000032816	Igdcc4	9579.41	2171.49	0.226683	5.61403e-21
ENSMUSG00000030313	Dennd5b	2490.42	565.485	0.227064	6.5007e-17
ENSMUSG00000025083	Afap1l2	5638.05	1280.21	0.227066	1.74755e-18
ENSMUSG00000045876	Pcdhb8	9.6097	2.18277	0.227143	0.0425862
ENSMUSG00000078484	Klhl17	1931.18	438.887	0.227263	1.16606e-15
ENSMUSG00000031342	Gpm6b	2237.26	509.339	0.227662	6.89443e-19
ENSMUSG00000026730	Pter	896.375	204.477	0.228115	1.4815e-22
ENSMUSG00000035305	Ror1	2634.42	601.043	0.22815	5.07998e-28
ENSMUSG00000055148	Klf2	3889.18	887.933	0.228308	3.128e-20
ENSMUSG00000028760	Eif4g3	13556.3	3099.45	0.228635	7.23291e-61
ENSMUSG00000032563	Mrpl3	6397.11	1463.04	0.228703	7.88935e-57
ENSMUSG00000037735	2810032G03Rik	292.891	67.0353	0.228875	3.97052e-15
ENSMUSG00000059713	Rcan3	1988.33	455.146	0.228908	7.3277e-40
ENSMUSG00000059708	Akap17b	1315.76	302.117	0.229614	1.11756e-28
ENSMUSG00000079444	Prickle4	177.655	40.8053	0.229688	1.40561e-11
ENSMUSG00000017639	Rab11fip4	24775.5	5700.43	0.230084	1.24535e-55
ENSMUSG00000078860	Gm11006	7.70935	1.7756	0.230318	0.0346908
ENSMUSG00000060260	Pwwp2b	1086.76	250.459	0.230464	1.25266e-28
ENSMUSG00000033308	Dpyd	3235.81	745.89	0.230511	4.13848e-34
ENSMUSG00000054034	Tceal5	58.684	13.5283	0.230528	2.50777e-06
ENSMUSG00000051674	Dcun1d4	1455.07	335.538	0.230599	2.8352e-32
ENSMUSG00000074203	G430095P16Rik	467.312	107.767	0.230611	6.54591e-18
ENSMUSG00000071856	Mcc	5282.15	1218.31	0.230646	1.0308e-30
ENSMUSG00000074121	Ntf5	714.654	165.236	0.231211	1.55057e-25
ENSMUSG00000028245	Nsmaf	12061.5	2789.4	0.231265	2.96869e-49
ENSMUSG00000031434	Morc4	1828.1	423.651	0.231744	2.8183e-26
ENSMUSG00000033752	Mnd1	622.267	144.394	0.232045	6.51795e-19
ENSMUSG00000062866	Phactr2	1756.83	407.676	0.232053	9.48103e-36
ENSMUSG00000071757	Zhx2	4580.26	1063.89	0.232278	4.48314e-55
ENSMUSG00000002289	Angptl4	337.549	78.4543	0.232423	2.31752e-10
ENSMUSG00000059493	Nhs	1382.59	321.357	0.232431	7.16312e-07
ENSMUSG00000028541	B4galt2	156.039	36.3051	0.232667	3.70964e-11
ENSMUSG00000032898	Fbxo21	5589.03	1300.62	0.23271	3.6033e-55
ENSMUSG00000028845	Tekt2	687.429	159.982	0.232726	2.0233e-20
ENSMUSG00000002732	Fkbp7	222.583	51.8294	0.232854	1.74238e-12
ENSMUSG00000024639	Gnaq	6398.16	1491.19	0.233065	5.66551e-57
ENSMUSG00000058761	Rnf169	2621.47	611.73	0.233354	1.40974e-43
ENSMUSG00000021365	Nedd9	4914.78	1147.07	0.233393	7.07198e-20
ENSMUSG00000036721	Zscan12	1121.04	261.743	0.233482	6.63208e-27
ENSMUSG00000010122	Slc47a1	1273.37	297.54	0.233664	6.31365e-19
ENSMUSG00000046312	AI464131	895.759	209.381	0.233747	1.5909e-22
ENSMUSG00000024246	Thumpd2	550.906	128.781	0.233761	3.93246e-18
ENSMUSG00000038702	Dsel	1319.42	308.567	0.233865	1.48287e-25
ENSMUSG00000024556	Me2	9324.71	2180.87	0.233881	1.25546e-58
ENSMUSG00000021676	Iqgap2	8854.93	2074.19	0.234241	1.51009e-57
ENSMUSG00000036995	Asap3	1799.84	421.624	0.234257	8.2329e-11
ENSMUSG00000068606	Gm4841	2807.33	658.444	0.234545	0.00513503
ENSMUSG00000043183	4732471D19Rik	679.827	159.612	0.234783	2.25196e-21
ENSMUSG00000071335	G630090E17Rik	406.793	95.546	0.234876	3.80622e-15
ENSMUSG00000051950	B3galtl	1192.38	280.414	0.235173	2.44661e-26
ENSMUSG00000003500	Impdh1	1684.18	396.123	0.235202	6.76459e-32
ENSMUSG00000026269	Rnpepl1	12803	3013.07	0.235341	1.19376e-44
ENSMUSG00000022054	Nefm	6059.96	1427.04	0.235487	7.43024e-36
ENSMUSG00000022112	Gpc5	239.643	56.4674	0.235631	3.29391e-12
ENSMUSG00000031112	2610018G03Rik	4777.8	1128.29	0.236152	1.10113e-28
ENSMUSG00000024098	Twsg1	15212.2	3593.31	0.236213	1.16442e-57
ENSMUSG00000057469	E2f6	1010.26	238.807	0.236383	1.38173e-25
ENSMUSG00000062619	2310039H08Rik	546.673	129.35	0.236613	3.33333e-17
ENSMUSG00000042426	Dhx29	8153.93	1931.07	0.236827	2.55267e-47
ENSMUSG00000030966	Trim21	2519.02	596.622	0.236847	3.61177e-42
ENSMUSG00000037656	Slc20a2	2579.28	611.094	0.236924	2.46265e-44
ENSMUSG00000029406	Pitpnm2	2216.07	525.519	0.23714	8.25603e-24
ENSMUSG00000029178	Klf3	3369.55	800.012	0.237424	9.49367e-49
ENSMUSG00000069439	Gm8444	9.18319	2.18277	0.237692	0.0180739
ENSMUSG00000037251	4930444A02Rik	1394.81	332.036	0.238051	2.84695e-30
ENSMUSG00000029673	Auts2	3347.11	796.914	0.23809	6.67641e-40
ENSMUSG00000044043	Pcdhb14	126.675	30.1639	0.23812	6.08489e-10
ENSMUSG00000054134	Umodl1	1723.27	411.35	0.238703	2.9473e-27
ENSMUSG00000033420	Antxr1	2898.03	692.037	0.238796	3.76208e-07
ENSMUSG00000090100	Ttbk2	3148.63	752.163	0.238886	1.20609e-46
ENSMUSG00000060268	Gm1661	129.942	31.1252	0.239532	3.26669e-09
ENSMUSG00000015305	Sash1	2732.41	654.636	0.239582	4.78822e-23
ENSMUSG00000046152	Fut10	452.38	108.41	0.239644	2.07701e-16
ENSMUSG00000063931	Pepd	9160.7	2199.9	0.240145	7.6042e-32
ENSMUSG00000061143	Maml3	2250.26	540.538	0.240211	7.43826e-42
ENSMUSG00000026411	Tmem9	2170.95	521.628	0.240276	4.29587e-39
ENSMUSG00000039953	Clstn1	29082.4	6990.21	0.240359	1.0388e-49
ENSMUSG00000026883	Dab2ip	7131.85	1715.12	0.240487	5.98258e-56
ENSMUSG00000027378	Nphp1	3236.5	779.795	0.240938	2.02224e-43
ENSMUSG00000033355	Rtp4	1669.98	402.585	0.241071	1.99555e-15
ENSMUSG00000048503	Tmem136	217.854	52.5457	0.241197	2.23741e-09
ENSMUSG00000025510	Cd151	5980.22	1443.65	0.241403	5.32212e-20
ENSMUSG00000036580	Spg20	3173.28	766.365	0.241505	3.67604e-44
ENSMUSG00000029163	Emilin1	212.504	51.3242	0.241521	1.88741e-11
ENSMUSG00000039616	Mocos	2181.83	527.775	0.241896	3.37638e-18
ENSMUSG00000084883	Ccdc85c	703.117	170.192	0.242054	6.88165e-20
ENSMUSG00000006494	Pdk1	4608.26	1120.34	0.243116	4.5829e-50
ENSMUSG00000058881	Zfp516	5670.83	1379.24	0.243217	1.24115e-53
ENSMUSG00000054412	Gm4793	144.831	35.255	0.243421	1.79408e-08
ENSMUSG00000026928	Card9	73.7841	17.9673	0.243512	3.83899e-06
ENSMUSG00000027985	Lef1	845.292	205.876	0.243555	3.49081e-21
ENSMUSG00000028086	Fbxw7	5628.93	1371.67	0.243682	2.35957e-32
ENSMUSG00000028523	Tctex1d1	62.7816	15.3039	0.243764	3.8842e-06
ENSMUSG00000022433	Csnk1e	3433.77	838.28	0.244128	6.46652e-47
ENSMUSG00000079004	Gm11031	28.7212	7.01671	0.244304	0.000150511
ENSMUSG00000021226	Acot2	618.314	151.077	0.244336	9.42791e-18
ENSMUSG00000025586	Cpeb1	1945.54	476.252	0.244791	1.28107e-33
ENSMUSG00000023927	Satb1	5518.06	1350.91	0.244816	4.39736e-22
ENSMUSG00000025265	Fgd1	1615.17	395.462	0.244842	8.19178e-34
ENSMUSG00000025104	Hdgfrp3	3344.48	819.412	0.245004	6.68578e-22
ENSMUSG00000026176	Ctdsp1	5596.35	1371.32	0.245039	7.56671e-53
ENSMUSG00000043154	Ppp2r3a	2173.19	532.722	0.245134	1.56489e-12
ENSMUSG00000078486	2310042D19Rik	1446.61	354.696	0.245192	3.19954e-27
ENSMUSG00000023034	Nr4a1	3542.1	869.19	0.245388	0.0957915
ENSMUSG00000020900	Myh10	7770.17	1906.78	0.245398	2.66082e-43
ENSMUSG00000018547	Pip4k2b	1847.47	453.616	0.245534	1.77684e-35
ENSMUSG00000023826	Park2	230.287	56.5776	0.245682	1.35686e-12
ENSMUSG00000050989	Sepn1	1894.12	465.601	0.245814	1.66967e-37
ENSMUSG00000057058	Skap1	479.729	118.001	0.245975	1.46968e-06
ENSMUSG00000078887	Gm6710	51.4011	12.665	0.246395	7.6097e-06
ENSMUSG00000041592	Sdk2	1656.34	408.91	0.246876	3.15425e-07
ENSMUSG00000036615	Rfxap	1516.1	374.359	0.246923	2.77814e-31
ENSMUSG00000028565	Nfia	10962.7	2712.44	0.247424	4.61464e-55
ENSMUSG00000028583	Pdpn	2122.5	525.488	0.24758	1.71184e-25
ENSMUSG00000063303	Gm10129	859.728	212.908	0.247645	1.6156e-17
ENSMUSG00000020682	Mmp28	1084.36	268.76	0.247851	2.97507e-26
ENSMUSG00000035085	1700020L24Rik	347.763	86.1996	0.247869	1.48408e-14
ENSMUSG00000060935	AI597468	2816.22	698.203	0.247922	7.70367e-42
ENSMUSG00000074355	Gm10676	357.297	88.6395	0.248083	4.65954e-14
ENSMUSG00000024070	Prkd3	3192.39	792.671	0.2483	7.27729e-44
ENSMUSG00000039683	Sdk1	2570.94	638.466	0.248339	1.49921e-40
ENSMUSG00000017491	Rarb	416.419	103.564	0.248701	0.000108312
ENSMUSG00000020605	Hs1bp3	1409.51	350.569	0.248718	7.34345e-27
ENSMUSG00000050394	Armcx6	737.162	183.362	0.248741	4.27621e-20
ENSMUSG00000018750	Zbtb4	3010.41	750.05	0.249152	9.26128e-47
ENSMUSG00000025153	Fasn	29353.7	7313.97	0.249167	1.29444e-48
ENSMUSG00000037692	Ahdc1	4103.72	1022.76	0.249228	4.7659e-31
ENSMUSG00000029672	Fam3c	2035.08	507.965	0.249605	8.44028e-36
ENSMUSG00000032086	Bace1	3619.25	903.87	0.24974	6.31694e-47
ENSMUSG00000032135	Mcam	772.539	193.018	0.249848	2.62012e-11
ENSMUSG00000067144	Slc22a7	1893.55	473.414	0.250013	5.25937e-37
ENSMUSG00000037325	Bbs7	2010.19	503.005	0.250228	1.37311e-32
ENSMUSG00000029705	Cux1	6733.62	1686.25	0.250423	8.46502e-53
ENSMUSG00000030067	Foxp1	2727.18	683.826	0.250745	1.17372e-41
ENSMUSG00000071547	Nt5dc2	1147.75	287.948	0.250881	2.76447e-24
ENSMUSG00000049807	Arhgap23	2400.34	602.865	0.251158	7.30285e-40
ENSMUSG00000055172	C1ra	447.98	112.947	0.252125	0.00136338
ENSMUSG00000027739	Rab33b	2313.96	583.419	0.25213	4.7722e-37
ENSMUSG00000001089	Luzp1	6420.38	1618.86	0.252143	4.85869e-52
ENSMUSG00000017692	Rhbdl3	6225.32	1570.31	0.252245	1.0495e-49
ENSMUSG00000040524	Zfp609	3014.28	760.404	0.252267	7.44786e-35
ENSMUSG00000038836	Agbl3	482.435	121.703	0.252268	3.93399e-16
ENSMUSG00000055053	Nfic	8202.67	2069.57	0.252304	2.22224e-53
ENSMUSG00000028709	Mob3c	1507.5	380.522	0.252418	9.46186e-22
ENSMUSG00000021066	Atl1	439.59	111.257	0.253093	9.81914e-15
ENSMUSG00000031872	Bean1	143.568	36.3418	0.253133	1.14817e-08
ENSMUSG00000030257	Srgap3	3001.51	759.92	0.253179	1.21593e-14
ENSMUSG00000031748	Gnao1	474.579	120.285	0.253456	1.50885e-16
ENSMUSG00000032411	Tfdp2	4892.5	1240.23	0.253496	1.66745e-39
ENSMUSG00000030055	Rab43	2856.59	724.751	0.253712	1.0406e-41
ENSMUSG00000015501	Hivep2	3753.46	952.479	0.25376	3.83579e-16
ENSMUSG00000053646	Plxnb1	24326.8	6179.83	0.254034	1.61804e-18
ENSMUSG00000041598	Cdc42ep4	6278.3	1596	0.25421	3.91702e-51
ENSMUSG00000024059	Clip4	9392.75	2388.54	0.254296	5.0137e-53
ENSMUSG00000041046	Ramp3	1726.48	439.209	0.254396	5.19499e-30
ENSMUSG00000002379	Ndufa11	8416.95	2142.11	0.254499	3.78401e-27
ENSMUSG00000042302	Ehbp1	1517.52	386.381	0.254614	1.31337e-17
ENSMUSG00000066026	Dhrs3	4508.81	1148.12	0.25464	6.69275e-25
ENSMUSG00000049929	Lpar4	72.1107	18.3867	0.254979	0.0195934
ENSMUSG00000056185	Snx32	822.169	209.825	0.255209	9.36344e-19
ENSMUSG00000015202	Cnksr3	1868.04	478.352	0.256072	8.8425e-28
ENSMUSG00000055912	Tmem150a	256.536	65.7158	0.256166	4.86768e-13
ENSMUSG00000024026	Glo1	3743.63	960.099	0.256462	1.65394e-43
ENSMUSG00000039197	Adk	1924.58	493.842	0.256598	3.96672e-31
ENSMUSG00000056679	Gpr173	260.893	66.9618	0.256664	1.55514e-10
ENSMUSG00000020780	Srp68	13087.7	3362.11	0.256891	2.04306e-52
ENSMUSG00000091764	Zfp964	59.4722	15.2794	0.256917	4.17705e-06
ENSMUSG00000025085	Ablim1	25640.4	6587.7	0.256926	3.97471e-46
ENSMUSG00000044551	9930012K11Rik	272.343	69.9834	0.256968	4.26627e-13
ENSMUSG00000048978	Nrsn1	122.616	31.5446	0.257264	2.67662e-08
ENSMUSG00000020829	Slc46a1	825.333	212.491	0.257461	1.59391e-20
ENSMUSG00000073652	Apol7d	453.168	116.893	0.257947	1.10956e-14
ENSMUSG00000038332	Sesn1	3363.56	867.681	0.257965	2.95875e-43
ENSMUSG00000032503	Arpp21	938.609	242.376	0.25823	1.32273e-08
ENSMUSG00000040711	Sh3pxd2b	4533.33	1171.3	0.258375	3.29738e-12
ENSMUSG00000039145	Camk1d	2141.38	554.14	0.258777	5.02087e-33
ENSMUSG00000020538	Srebf1	13611.5	3527.46	0.259153	6.87044e-48
ENSMUSG00000035472	Slc25a21	464.824	120.542	0.259329	5.16237e-15
ENSMUSG00000021193	Pitrm1	11494.2	2982.26	0.259458	7.47066e-52
ENSMUSG00000045071	E130308A19Rik	1044.88	271.261	0.25961	2.69044e-24
ENSMUSG00000028521	Slc35d1	2145.45	557.075	0.259654	1.49699e-09
ENSMUSG00000091191	Gm17334	1936.27	502.864	0.259707	0.000536645
ENSMUSG00000029059	2810405K02Rik	15608.3	4056.16	0.259872	9.46035e-24
ENSMUSG00000020393	Kremen1	7410.62	1929.02	0.260305	3.1005e-46
ENSMUSG00000032263	Bckdhb	3052.54	794.979	0.260432	4.78082e-39
ENSMUSG00000040729	AK129341	2064.52	538.015	0.260601	2.79245e-21
ENSMUSG00000044707	Ccnjl	1613.25	420.479	0.260641	1.51313e-28
ENSMUSG00000024598	Fbn2	704.154	183.549	0.260666	3.24528e-11
ENSMUSG00000021375	Kif13a	7839.4	2044.03	0.260738	6.67521e-51
ENSMUSG00000052504	Epha3	3085.59	807.158	0.261589	2.66422e-41
ENSMUSG00000029859	Epha1	2381.11	623.018	0.261651	5.76618e-39
ENSMUSG00000026991	Pkp4	7454.89	1951.08	0.261718	1.1312e-50
ENSMUSG00000028019	Pdgfc	505.648	132.433	0.261907	7.82508e-16
ENSMUSG00000054676	1600014C10Rik	5075.94	1329.49	0.261921	1.86281e-47
ENSMUSG00000002980	Bcam	4358.53	1143.11	0.26227	5.13473e-10
ENSMUSG00000000552	Zfp385a	1680.73	440.935	0.262348	1.73896e-33
ENSMUSG00000055254	Ntrk2	505.671	132.69	0.262404	8.72347e-15
ENSMUSG00000039234	Sec24d	11726.4	3077.37	0.262431	4.88932e-51
ENSMUSG00000037990	Sh3rf3	3733.93	980.001	0.262459	8.64968e-45
ENSMUSG00000035158	Mitf	912.318	239.643	0.262675	3.49915e-11
ENSMUSG00000060671	Atp8b2	4134.5	1086.13	0.262698	3.34035e-41
ENSMUSG00000031925	Maml2	1297.4	341.012	0.262843	1.76102e-18
ENSMUSG00000050017	Pitpnb	10570.3	2779.14	0.262918	6.04213e-51
ENSMUSG00000070526	Peg12	179.021	47.0965	0.263078	5.47596e-10
ENSMUSG00000014303	Glis2	1399.55	368.39	0.26322	2.74101e-16
ENSMUSG00000025931	Paqr8	771.033	203.105	0.263419	2.57097e-18
ENSMUSG00000079020	Slc45a4	6478.49	1706.7	0.263441	1.94507e-41
ENSMUSG00000067071	Hes6	13784.9	3634.96	0.263692	6.21942e-17
ENSMUSG00000058571	Gpc6	659.453	173.954	0.263786	4.72969e-17
ENSMUSG00000026102	Inpp1	4104.51	1083.94	0.264086	1.60068e-44
ENSMUSG00000084845	Gm5151	29.8333	7.88002	0.264136	0.000216991
ENSMUSG00000089798	1700028K03Rik	193.739	51.1773	0.264157	0.00225893
ENSMUSG00000032249	Anp32a	5252.39	1387.82	0.264227	8.02672e-48
ENSMUSG00000055951	Ccl25	94.877	25.0942	0.264492	1.69422e-07
ENSMUSG00000074896	Ifit3	1663.01	440.011	0.264586	4.23082e-05
ENSMUSG00000037761	Actr5	1867.97	495.529	0.265277	6.24294e-32
ENSMUSG00000073492	Gm10521	52.9181	14.0457	0.265422	7.71505e-06
ENSMUSG00000021271	Zfp839	1477.94	392.382	0.265493	3.21226e-31
ENSMUSG00000022323	Hrsp12	600.65	159.6	0.265712	2.13602e-17
ENSMUSG00000022414	Tab1	2601.31	691.21	0.265716	1.7546e-32
ENSMUSG00000079733	Tmem181b-ps	1231.97	327.492	0.265828	3.43629e-26
ENSMUSG00000005779	Psmb4	24024.5	6391.5	0.26604	4.54693e-23
ENSMUSG00000032657	Fam189b	663.923	176.652	0.266072	9.43392e-19
ENSMUSG00000069227	Gprin1	963.853	256.637	0.266261	4.45992e-22
ENSMUSG00000042558	Adprhl2	2962.13	789.411	0.266501	2.12459e-40
ENSMUSG00000032560	Dnajc13	27050.7	7210.98	0.266573	4.89519e-45
ENSMUSG00000035901	Dennd5a	5041.53	1346.8	0.267141	3.39895e-46
ENSMUSG00000026395	Ptprc	3025.74	808.37	0.267164	3.15739e-15
ENSMUSG00000031910	Has3	3069.7	820.83	0.267397	3.70991e-39
ENSMUSG00000027428	Rbbp9	1312.71	351.038	0.267415	6.61476e-28
ENSMUSG00000023959	Clic5	16938.3	4542.95	0.268206	4.99857e-48
ENSMUSG00000091428	Gm17507	427.741	114.759	0.268292	0.0399171
ENSMUSG00000022843	Clcn2	1580.87	424.352	0.268429	6.02786e-07
ENSMUSG00000052698	Tln2	3344.96	898.684	0.268668	1.97561e-37
ENSMUSG00000049119	Fam110b	783.893	210.688	0.268772	9.51031e-21
ENSMUSG00000028358	Zfp618	2595.03	698.245	0.269071	6.66158e-22
ENSMUSG00000010051	Hyal1	475.567	128.027	0.26921	1.09144e-05
ENSMUSG00000030145	Zfp248	777.415	209.715	0.269759	1.32538e-19
ENSMUSG00000047033	Pcdhb15	35.9608	9.7046	0.269866	8.76795e-05
ENSMUSG00000026193	Fn1	49909.4	13486.9	0.270227	4.82462e-29
ENSMUSG00000041748	Ccrl1	265.077	71.6733	0.270387	1.51698e-11
ENSMUSG00000029249	Rest	3004.86	812.717	0.270467	7.29703e-40
ENSMUSG00000044066	Cep68	2834.02	767.111	0.27068	9.0465e-39
ENSMUSG00000036904	Fzd8	1162.77	315.176	0.271056	3.33083e-19
ENSMUSG00000050222	Il17d	140.431	38.0807	0.271169	1.25518e-08
ENSMUSG00000022389	Tef	6625.22	1796.81	0.271208	3.56613e-47
ENSMUSG00000033068	Entpd6	3261.99	884.908	0.271278	1.79397e-38
ENSMUSG00000033316	Galnt9	317.822	86.2609	0.271412	1.08903e-12
ENSMUSG00000054708	Ankrd24	1707.55	463.538	0.271463	3.9607e-31
ENSMUSG00000038658	C030046E11Rik	8982.98	2439.38	0.271555	1.76186e-48
ENSMUSG00000058709	Egln2	3921.7	1065.21	0.27162	1.4142e-33
ENSMUSG00000061039	Olfr920	506.61	137.708	0.271822	9.02371e-09
ENSMUSG00000067924	Cxx1b	191.109	52.0651	0.272437	4.97486e-10
ENSMUSG00000025014	Dntt	1789.02	487.634	0.272571	0.0157236
ENSMUSG00000074603	Gm10729	33.8446	9.23622	0.272901	0.0267865
ENSMUSG00000078861	Zfp931	375.972	102.612	0.272924	9.74549e-13
ENSMUSG00000050812	AI314180	30085.6	8216.62	0.273108	2.44207e-42
ENSMUSG00000078862	Gm14326	311.263	85.0149	0.273129	4.23981e-12
ENSMUSG00000028195	Cyr61	5189.69	1420.98	0.273808	0.000187875
ENSMUSG00000016087	Fli1	123.587	33.8498	0.273894	0.0145531
ENSMUSG00000049396	Gemin4	20.7796	5.69725	0.274175	0.00682967
ENSMUSG00000026778	Prkcq	3273.36	898.76	0.274568	1.17574e-37
ENSMUSG00000037541	Shank2	3378.48	929.05	0.27499	2.05906e-38
ENSMUSG00000038742	Angptl6	883.002	243.023	0.275223	4.92602e-21
ENSMUSG00000034781	Gna11	3844.33	1058.69	0.275389	2.95931e-41
ENSMUSG00000033436	Armcx2	4386	1209.48	0.275759	1.8381e-41
ENSMUSG00000078870	Gm14410	71.3061	19.6817	0.276017	3.15869e-06
ENSMUSG00000029392	Rilpl1	523.259	144.504	0.276161	1.62353e-15
ENSMUSG00000061740	Cyp2d22	125.072	34.5539	0.276272	0.0280481
ENSMUSG00000051934	Spats2	6815.94	1883.95	0.276404	2.20841e-45
ENSMUSG00000000326	Comt	8405.09	2323.43	0.276431	1.94568e-45
ENSMUSG00000035776	Cd99l2	2433.15	672.622	0.276441	4.99973e-35
ENSMUSG00000064043	Trerf1	1642.01	454.329	0.276691	8.00748e-30
ENSMUSG00000074521	Gm14327	17.3622	4.80945	0.277006	0.00518968
ENSMUSG00000035045	Zc3h12b	58.4465	16.2162	0.277454	1.25543e-05
ENSMUSG00000022010	Tsc22d1	46520.3	12909.5	0.277503	2.89231e-35
ENSMUSG00000045573	Penk	4289.61	1191.11	0.277673	1.64096e-33
ENSMUSG00000072960	BC065397	81.9147	22.7523	0.277756	7.30172e-07
ENSMUSG00000022197	Pdzd2	9519.07	2644.07	0.277766	5.82642e-22
ENSMUSG00000034109	Golim4	4617.81	1282.83	0.2778	3.1843e-43
ENSMUSG00000072875	Gpr27	260.903	72.5367	0.278021	7.15073e-06
ENSMUSG00000054178	Gm9938	428.194	119.064	0.27806	3.0005e-14
ENSMUSG00000078485	Plekhn1	2553.44	710.277	0.278164	1.30883e-36
ENSMUSG00000078582	Hivep3	31.5177	8.78007	0.278576	0.0168205
ENSMUSG00000019789	Hey2	333.943	93.0572	0.278662	0.00191246
ENSMUSG00000046317	BC107364	70.8959	19.7674	0.278823	3.68137e-06
ENSMUSG00000046550	Spin2	152.341	42.4829	0.278868	1.45345e-08
ENSMUSG00000047227	Gm527	254.015	70.9202	0.279197	7.24155e-11
ENSMUSG00000033170	Card10	2085.56	582.415	0.279261	8.70271e-33
ENSMUSG00000026705	Klhl20	3041.18	849.604	0.279366	3.43861e-37
ENSMUSG00000037833	Sh2d4b	13258.7	3704.58	0.279408	5.0015e-46
ENSMUSG00000030341	Tnfrsf1a	5916.98	1653.51	0.279452	6.35227e-45
ENSMUSG00000015653	Steap2	443.726	124.109	0.279697	2.57632e-13
ENSMUSG00000034610	Zcchc11	4998.15	1399.94	0.280092	1.90206e-14
ENSMUSG00000038578	Susd1	348.001	97.5207	0.280231	2.05857e-11
ENSMUSG00000039328	Rnf122	1269.66	356.132	0.280494	0.00352312
ENSMUSG00000003992	Ssbp2	1325.72	371.941	0.280558	2.21514e-25
ENSMUSG00000050530	Fam171a1	1971.46	553.304	0.280657	7.67262e-34
ENSMUSG00000050332	Fam123b	1163.41	326.546	0.28068	1.39166e-24
ENSMUSG00000092192	Dyx1c1	177.288	49.8578	0.281225	3.18702e-09
ENSMUSG00000026344	Lypd1	1720.53	484.306	0.281487	5.15285e-34
ENSMUSG00000032216	Nedd4	84118.6	23731.1	0.282115	1.13809e-25
ENSMUSG00000052560	Cpne8	1369.95	386.672	0.282254	2.55938e-14
ENSMUSG00000054074	2810030E01Rik	623.384	175.987	0.28231	5.45082e-16
ENSMUSG00000058254	Tspan7	620.037	175.197	0.28256	4.52293e-07
ENSMUSG00000020173	Cobl	5843.5	1652.93	0.282865	1.2633e-43
ENSMUSG00000047415	Gpr68	3305.54	935.418	0.282985	8.136e-22
ENSMUSG00000017697	Ada	2728.41	773.133	0.283364	6.14425e-33
ENSMUSG00000027938	Creb3l4	188.307	53.3601	0.283367	4.26909e-05
ENSMUSG00000062661	Ncs1	1740.06	493.301	0.283496	1.55061e-28
ENSMUSG00000079003	Samd1	2129.94	603.899	0.283529	1.78576e-26
ENSMUSG00000038594	Gm9766	69.3141	19.6572	0.283596	0.000331915
ENSMUSG00000035246	Pcyt1b	274.022	77.9124	0.284329	2.13261e-11
ENSMUSG00000030522	Mtmr10	2655.25	755.163	0.284403	2.84971e-34
ENSMUSG00000024513	Mbd2	4852.32	1380.11	0.284422	3.40338e-42
ENSMUSG00000062257	Opcml	1659.7	472.162	0.284486	4.8493e-23
ENSMUSG00000053081	1700069B07Rik	30.7726	8.75558	0.284525	0.00030148
ENSMUSG00000012296	Tjap1	3775.79	1074.83	0.284665	3.74609e-40
ENSMUSG00000050373	Snx21	926.343	263.727	0.284697	1.53495e-21
ENSMUSG00000032041	Tirap	938.825	267.661	0.285102	6.2281e-22
ENSMUSG00000027803	Wwtr1	2032.62	580.168	0.285429	2.65583e-18
ENSMUSG00000022537	Tmem44	148.783	42.4829	0.285536	1.23353e-08
ENSMUSG00000034412	Tbc1d10a	5235.41	1495.93	0.285733	2.88915e-43
ENSMUSG00000046574	Prr12	7076.69	2023.01	0.28587	1.2571e-44
ENSMUSG00000041949	Tmco7	1226.92	350.744	0.285874	7.39473e-23
ENSMUSG00000027332	Ivd	4325.76	1236.77	0.285907	8.26477e-41
ENSMUSG00000051675	Trim32	1301.01	372.027	0.285953	4.04148e-25
ENSMUSG00000022636	Alcam	25787.9	7377.84	0.286098	8.69379e-40
ENSMUSG00000006356	Crip2	6495.67	1859.59	0.286282	1.03764e-26
ENSMUSG00000078867	Gm14418	348.87	99.8993	0.286351	1.95484e-11
ENSMUSG00000055932	Fto	5289.61	1514.77	0.286368	1.59537e-42
ENSMUSG00000025171	Ubtd1	797.746	228.508	0.286443	7.06216e-21
ENSMUSG00000035064	Eef2k	1962.09	562.874	0.286874	5.0568e-34
ENSMUSG00000028207	Asph	7338.9	2105.4	0.286882	4.9324e-44
ENSMUSG00000030056	Isy1	3508.95	1007.12	0.287014	4.03413e-38
ENSMUSG00000073429	C130040N14Rik	300.659	86.3833	0.287313	7.51841e-12
ENSMUSG00000030757	Zkscan2	82.3628	23.6646	0.287321	3.35508e-06
ENSMUSG00000026727	Rsu1	2722.88	782.593	0.287414	8.03107e-36
ENSMUSG00000019194	Scn1b	263.138	75.6562	0.287515	6.33702e-11
ENSMUSG00000047330	Kcne4	132.63	38.1419	0.287581	7.36629e-05
ENSMUSG00000038522	AI317395	106.84	30.7425	0.287742	4.93549e-07
ENSMUSG00000042203	Tbc1d22b	4753.41	1369.75	0.288161	2.41323e-41
ENSMUSG00000019951	Uhrf1bp1l	4104.14	1183.38	0.288339	6.35528e-39
ENSMUSG00000028093	Acp6	1279.5	369.832	0.289044	1.81634e-24
ENSMUSG00000018899	Irf1	30076	8703.24	0.289375	0.0028448
ENSMUSG00000035164	Zc3h12c	2832.71	821.372	0.28996	3.32099e-07
ENSMUSG00000051678	Pcdhb6	12.0229	3.48999	0.290278	0.0179473
ENSMUSG00000041959	S100a10	7412.39	2152.2	0.290351	5.30597e-43
ENSMUSG00000020585	Laptm4a	23643.1	6873.36	0.290714	4.30298e-40
ENSMUSG00000001482	Def8	3462.92	1007.44	0.290922	1.02782e-37
ENSMUSG00000072964	Bhlhb9	5049.03	1468.91	0.290929	2.53679e-40
ENSMUSG00000063415	Cyp26b1	1411.88	411.264	0.291288	3.05607e-20
ENSMUSG00000061887	Ssbp3	8230.38	2397.65	0.291317	1.15242e-43
ENSMUSG00000034245	Hdac11	3627.83	1057.14	0.291398	3.16208e-39
ENSMUSG00000075593	Gal3st4	286.58	83.6219	0.291793	4.15501e-07
ENSMUSG00000001288	Rarg	2411.71	703.799	0.291825	1.18426e-34
ENSMUSG00000061758	Akr1b10	594.679	173.927	0.292472	8.01204e-17
ENSMUSG00000028268	Gbp3	4232.78	1239.13	0.292747	7.39064e-06
ENSMUSG00000040681	Hmgn1	16320	4778.11	0.292776	1.40644e-42
ENSMUSG00000022146	Osmr	4752.38	1392.01	0.292909	0.00169459
ENSMUSG00000046523	Kctd4	596.547	174.851	0.293106	4.34218e-19
ENSMUSG00000024421	Lama3	12461.2	3653.59	0.293198	2.40171e-25
ENSMUSG00000032846	Zswim6	1647.65	483.372	0.293371	6.78065e-09
ENSMUSG00000034645	Zyg11a	52.1246	15.3039	0.293602	0.000505856
ENSMUSG00000058325	Dock1	11147.3	3273.22	0.293633	1.56862e-43
ENSMUSG00000030532	Hddc3	281.505	82.6729	0.293682	3.03248e-11
ENSMUSG00000051579	Tceal8	2370.19	696.455	0.293839	9.95495e-32
ENSMUSG00000036109	Mbnl3	3768.58	1108.7	0.294195	7.21711e-19
ENSMUSG00000078898	Gm4723	13.4104	3.94613	0.294259	0.0130358
ENSMUSG00000015127	Unkl	3344.22	984.483	0.294384	1.49508e-36
ENSMUSG00000020806	Rhbdf2	5678.69	1672.18	0.294466	9.14556e-42
ENSMUSG00000039298	Cdk5rap2	10052.6	2963.32	0.294782	3.15554e-43
ENSMUSG00000030386	Zfp606	741.097	218.495	0.294826	2.5959e-18
ENSMUSG00000035109	Shc4	2465.15	726.986	0.294905	8.27071e-32
ENSMUSG00000026343	Gpr39	1120.63	330.493	0.294918	6.73285e-26
ENSMUSG00000032058	Ppp2r1b	5172.66	1526.9	0.295187	3.80693e-40
ENSMUSG00000028139	Riiad1	646.825	191.267	0.295701	1.49501e-11
ENSMUSG00000046711	Hmga1	672.28	199.049	0.29608	1.97125e-16
ENSMUSG00000041440	Gk5	2177.07	646.061	0.296757	2.07649e-25
ENSMUSG00000078875	Gm14419	19.1978	5.69725	0.296765	0.00529258
ENSMUSG00000078768	Zfp566	264.602	78.5921	0.29702	1.05493e-10
ENSMUSG00000011837	Snapc2	1784.98	530.429	0.297162	2.1719e-24
ENSMUSG00000035107	Dcbld2	4533.86	1347.35	0.297174	6.0625e-37
ENSMUSG00000057531	Dtnbp1	2451.06	728.719	0.297307	1.93356e-31
ENSMUSG00000029455	Aldh2	6248.62	1858.84	0.29748	5.21582e-42
ENSMUSG00000051721	BC068281	277.936	82.6974	0.297541	7.63295e-11
ENSMUSG00000066643	Wdr35	3436.9	1022.65	0.297549	1.69123e-35
ENSMUSG00000020541	Tom1l1	4674.93	1395.48	0.298503	2.52991e-38
ENSMUSG00000029869	Ephb6	1628.27	486.094	0.298535	7.5214e-28
ENSMUSG00000048612	Myof	6130.43	1831.15	0.298698	3.68698e-40
ENSMUSG00000031165	Was	215.883	64.5066	0.298803	4.16515e-05
ENSMUSG00000048747	E130114P18Rik	109.848	32.8273	0.298844	1.77703e-07
ENSMUSG00000092279	1500011B03Rik	140.62	42.0268	0.298867	8.6039e-08
ENSMUSG00000022948	Setd4	295.612	88.3579	0.298898	2.78928e-11
ENSMUSG00000079019	Insl3	24.8773	7.43612	0.298912	0.00149638
ENSMUSG00000034557	Zfyve9	3392.59	1014.27	0.298966	4.14843e-36
ENSMUSG00000006369	Fbln1	2180.74	652.53	0.299224	1.65901e-31
ENSMUSG00000031070	Mrgprf	108.12	32.3589	0.299287	1.00676e-07
ENSMUSG00000033446	Lpar6	882.981	264.354	0.299388	4.828e-18
ENSMUSG00000026014	Raph1	2031.15	609.125	0.299891	3.84794e-23
ENSMUSG00000063558	Aox1	1254.63	376.282	0.299915	2.31529e-08
ENSMUSG00000038587	Akap12	14992.2	4499.26	0.300106	2.09295e-37
ENSMUSG00000043753	Dmrta1	604.267	181.721	0.30073	3.36703e-14
ENSMUSG00000023341	Mx2	599.15	180.279	0.300892	0.0267732
ENSMUSG00000066057	2610044O15Rik	89.9426	27.0688	0.300957	3.40205e-05
ENSMUSG00000026135	Zfp142	3348.47	1008.11	0.301066	5.29342e-36
ENSMUSG00000074364	Ehd2	809.018	243.653	0.301171	5.52517e-07
ENSMUSG00000032702	Kank1	4893.02	1474.03	0.301251	1.46713e-39
ENSMUSG00000000409	Lck	2637.19	795.463	0.301632	7.69003e-07
ENSMUSG00000039105	Atp6v1g1	9002.12	2715.75	0.301679	1.42282e-41
ENSMUSG00000020232	Hmg20b	6696.12	2021.16	0.301841	8.89643e-41
ENSMUSG00000009035	Tmem184b	7353.52	2219.98	0.301894	1.98844e-38
ENSMUSG00000037032	Apbb1	1528.3	461.484	0.301959	1.33367e-24
ENSMUSG00000025151	Maged1	24421.3	7374.59	0.301973	3.12316e-37
ENSMUSG00000027259	Adal	862.541	260.779	0.302337	3.48037e-18
ENSMUSG00000028270	Gbp2	5262.16	1590.98	0.302344	0.000328196
ENSMUSG00000059486	Kbtbd2	5538.34	1676.73	0.30275	1.54439e-39
ENSMUSG00000021140	Pcnx	5522.69	1672.7	0.302877	1.37036e-39
ENSMUSG00000022203	Efs	5728.37	1736.6	0.303158	4.45898e-19
ENSMUSG00000005034	Prkacb	5164.69	1565.85	0.303183	8.27196e-39
ENSMUSG00000020696	Rffl	4170.32	1264.62	0.303243	2.8972e-37
ENSMUSG00000030725	Lipt2	82.3033	24.9595	0.303263	5.36237e-06
ENSMUSG00000069196	Gm3511	21.5031	6.52383	0.30339	0.0164162
ENSMUSG00000031575	Ash2l	6963.53	2114.27	0.303621	2.25258e-40
ENSMUSG00000019487	Trip10	2064.39	627.096	0.303768	1.22631e-31
ENSMUSG00000055633	Zfp580	142.483	43.285	0.303792	4.86512e-08
ENSMUSG00000022342	Kcnv1	83.2806	25.3055	0.303858	0.00188616
ENSMUSG00000018340	Anxa6	13172.3	4003.69	0.303949	1.03909e-39
ENSMUSG00000025607	Copg2	9539.7	2899.74	0.303965	3.09272e-41
ENSMUSG00000028218	Fam92a	2763.71	840.169	0.304	5.96267e-32
ENSMUSG00000022747	St3gal6	5323.25	1618.43	0.30403	1.72035e-37
ENSMUSG00000022246	Rai14	6799.91	2068.8	0.304239	2.0486e-40
ENSMUSG00000019841	Rev3l	6064.75	1845.43	0.304288	3.61575e-23
ENSMUSG00000032776	Mctp2	1263.15	384.517	0.30441	6.50057e-24
ENSMUSG00000046562	Unc119b	2198.14	669.3	0.304485	2.19802e-24
ENSMUSG00000035606	Ky	799.706	243.629	0.304648	4.21673e-16
ENSMUSG00000032228	Tcf12	9930.28	3026.15	0.30474	4.13502e-25
ENSMUSG00000028737	Aldh4a1	11219.5	3421.71	0.30498	1.76922e-40
ENSMUSG00000071722	Spin4	144.675	44.2218	0.305664	8.42117e-08
ENSMUSG00000030872	Gga2	7643.28	2336.42	0.305683	1.96539e-40
ENSMUSG00000091922	Gm17409	7.21807	2.20726	0.305797	0.070339
ENSMUSG00000045822	Zswim3	614.768	188.098	0.305966	1.41912e-14
ENSMUSG00000054008	Ndst1	4466.02	1366.48	0.305972	1.20367e-37
ENSMUSG00000032352	Lrrc1	3568.16	1092.46	0.30617	6.74069e-35
ENSMUSG00000020475	Pgam2	500.007	153.284	0.306564	1.02719e-12
ENSMUSG00000041037	Irgq	5247.38	1609.48	0.30672	8.12073e-39
ENSMUSG00000047591	Mafa	1242	380.969	0.306738	1.66352e-21
ENSMUSG00000062421	Arf2	2671.3	819.673	0.306844	3.58996e-30
ENSMUSG00000042372	Dmrt3	997.212	306.148	0.307004	2.41589e-20
ENSMUSG00000032009	Sesn3	5149.9	1581.91	0.307173	7.32826e-39
ENSMUSG00000031652	N4bp1	3119.54	958.292	0.30719	1.32478e-34
ENSMUSG00000046798	Cldn12	1408.83	432.798	0.307203	8.65174e-10
ENSMUSG00000000282	Mnt	2470.52	759.085	0.307257	2.13472e-32
ENSMUSG00000055044	Pdlim1	15286.2	4707.75	0.307973	2.07976e-30
ENSMUSG00000024544	D18Ertd653e	462.227	142.382	0.308036	3.65365e-13
ENSMUSG00000092299	Psmb9	11822.1	3642.73	0.308128	3.1502e-40
ENSMUSG00000037685	Atp8a1	3002.24	925.18	0.308163	2.8019e-34
ENSMUSG00000032959	Pebp1	9215.36	2843	0.308506	6.28611e-35
ENSMUSG00000041220	Elovl6	2746.36	847.332	0.308529	3.75016e-32
ENSMUSG00000038418	Egr1	39631.2	12233.7	0.308689	0.0225751
ENSMUSG00000009633	G0s2	479.794	148.129	0.308734	1.87496e-08
ENSMUSG00000028040	Efna4	233.969	72.2397	0.308757	7.72449e-11
ENSMUSG00000006958	Chrd	452.363	139.707	0.308837	0.00179593
ENSMUSG00000060703	Cd302	96.0539	29.671	0.3089	1.37281e-05
ENSMUSG00000036249	Rbm43	2547.71	787.834	0.309232	3.74874e-30
ENSMUSG00000025577	Cbx2	1926.23	595.974	0.309399	2.9405e-29
ENSMUSG00000047996	Prrg1	590.808	182.918	0.309607	3.59787e-07
ENSMUSG00000079451	Tmprss11g	77.7738	24.1085	0.309982	1.14358e-05
ENSMUSG00000002957	Ap2a2	7157.61	2218.81	0.309993	2.08571e-39
ENSMUSG00000037235	Mxd4	8222.68	2549.12	0.310011	7.99026e-40
ENSMUSG00000032875	Arhgef17	6805.95	2110.14	0.310043	1.67358e-39
ENSMUSG00000028524	Sgip1	202.544	62.8076	0.310094	9.20477e-05
ENSMUSG00000029924	Slc37a3	2672.74	828.869	0.31012	5.89748e-32
ENSMUSG00000028675	Pnrc2	12633.3	3923.04	0.310532	2.59043e-23
ENSMUSG00000022286	Grhl2	4186.37	1300.92	0.310751	5.43198e-28
ENSMUSG00000041702	Btbd7	3249.55	1010	0.310811	1.55492e-34
ENSMUSG00000073617	Hdac4	1161.91	361.281	0.310937	1.30415e-21
ENSMUSG00000040836	Gpr161	400.849	124.651	0.310967	5.92557e-12
ENSMUSG00000031227	Magee1	595.774	185.312	0.311044	3.63597e-11
ENSMUSG00000001098	Kctd10	7201.37	2240.41	0.311109	4.18661e-39
ENSMUSG00000034462	Pkd2	3874.04	1206.09	0.311327	3.7976e-19
ENSMUSG00000008450	Nutf2	314.367	97.9034	0.31143	9.31277e-11
ENSMUSG00000035585	Tsen34	2691.4	838.381	0.311503	1.01615e-31
ENSMUSG00000028743	Akr7a5	2668.7	831.425	0.311547	3.47623e-18
ENSMUSG00000029276	Glmn	737.832	230.125	0.311894	6.37648e-11
ENSMUSG00000026842	Abl1	7308.42	2280.12	0.311985	2.72534e-39
ENSMUSG00000060988	Galnt13	258.431	80.6371	0.312025	9.46467e-09
ENSMUSG00000075590	Nrbp2	2346.71	732.511	0.312144	0.00450574
ENSMUSG00000021950	Anxa8	4025.86	1256.9	0.312206	4.51294e-35
ENSMUSG00000019804	Snx3	8459.48	2643.2	0.312455	2.7033e-39
ENSMUSG00000021690	Jmy	3498.52	1093.43	0.312542	1.62445e-35
ENSMUSG00000051043	Gprc5c	1360.15	425.212	0.312623	2.61236e-23
ENSMUSG00000025246	Tbl1x	13933.2	4358.39	0.312805	1.02359e-38
ENSMUSG00000058883	Zfp708	239.579	74.9521	0.31285	1.61089e-09
ENSMUSG00000079608	Stard6	71.0686	22.2594	0.31321	2.37879e-05
ENSMUSG00000058446	Znrf2	8280.96	2595.55	0.313436	4.04934e-39
ENSMUSG00000043207	Zmpste24	8442.81	2646.37	0.313447	6.4296e-39
ENSMUSG00000011832	Evi5l	1812.16	568.099	0.313493	2.59401e-26
ENSMUSG00000047181	Samd14	7749.58	2430.45	0.313624	6.01084e-39
ENSMUSG00000005533	Igf1r	5696.88	1786.92	0.313666	6.19598e-38
ENSMUSG00000027560	Dok5	301.248	94.548	0.313854	3.12173e-10
ENSMUSG00000044167	Foxo1	3220.65	1011.61	0.3141	2.21599e-33
ENSMUSG00000029366	Dck	1890.72	593.91	0.314118	8.03371e-25
ENSMUSG00000025538	Sumf2	784.762	246.589	0.314222	5.8152e-17
ENSMUSG00000031907	Zfp90	840.115	263.987	0.314227	7.35475e-19
ENSMUSG00000049382	Krt8	195421	61481.1	0.314609	3.21461e-13
ENSMUSG00000019846	Lama4	5868.06	1848.17	0.314953	1.29887e-37
ENSMUSG00000021573	Tppp	1811.13	570.628	0.315068	1.98593e-15
ENSMUSG00000068749	Psma5	3443.26	1085.32	0.315201	4.0638e-33
ENSMUSG00000022272	Myo10	19843.4	6255.81	0.31526	1.04711e-30
ENSMUSG00000017774	Myo1c	10664.9	3366.48	0.315661	8.81411e-39
ENSMUSG00000027217	Tspan18	2940.33	928.389	0.315743	7.85314e-33
ENSMUSG00000021067	Sav1	2977.69	940.34	0.315796	2.57474e-32
ENSMUSG00000001119	Col6a1	7902.82	2498	0.316089	0.0241648
ENSMUSG00000020601	Trib2	1911.4	604.598	0.316312	2.73602e-26
ENSMUSG00000036960	Clca5	1315.3	416.114	0.316364	2.20678e-09
ENSMUSG00000037736	Limch1	6008.2	1901.85	0.316543	1.45317e-14
ENSMUSG00000019082	Slc25a22	1746.1	552.796	0.316588	7.88483e-26
ENSMUSG00000001497	Pax9	8456.87	2678.7	0.316749	2.58188e-24
ENSMUSG00000078429	Ctdsp2	7349.78	2329.45	0.316942	2.45735e-38
ENSMUSG00000051316	Taf7	2418.26	766.459	0.316947	8.42922e-29
ENSMUSG00000037395	Rcor3	1375.92	436.101	0.316952	2.04852e-23
ENSMUSG00000047238	Mageh1	536.394	170.106	0.317129	1.2164e-13
ENSMUSG00000021144	Mta1	5035.9	1598.68	0.317456	1.61e-36
ENSMUSG00000039096	Rsad1	1331.19	422.821	0.317626	6.58969e-21
ENSMUSG00000085795	Zfp703	7157.3	2275.71	0.317956	2.80339e-20
ENSMUSG00000059674	Cdh24	516.171	164.161	0.318036	6.36945e-13
ENSMUSG00000048142	Nat8l	429.467	136.624	0.318124	7.81231e-11
ENSMUSG00000022018	1190002H23Rik	948.24	301.685	0.318152	5.03941e-16
ENSMUSG00000035992	Fnip1	3228.29	1027.31	0.318222	2.65413e-09
ENSMUSG00000039852	Rere	14220.6	4525.86	0.31826	2.89989e-36
ENSMUSG00000032766	Gng11	173.299	55.1602	0.318296	1.89263e-07
ENSMUSG00000021285	Ppp1r13b	6663.48	2121.45	0.318369	8.10559e-38
ENSMUSG00000026223	Itm2c	15997.7	5093.6	0.318396	3.60721e-36
ENSMUSG00000067085	Gm10197	239.147	76.1981	0.318625	2.16078e-09
ENSMUSG00000024535	Snx24	236.075	75.2245	0.318647	8.80862e-09
ENSMUSG00000040151	Hs2st1	7943.98	2533.08	0.318868	5.23874e-38
ENSMUSG00000020395	Itk	693.853	221.305	0.318951	2.51303e-13
ENSMUSG00000037234	Hook3	6456.18	2059.27	0.318961	1.41588e-37
ENSMUSG00000022253	1110020G09Rik	2023.66	645.522	0.318987	5.71134e-26
ENSMUSG00000020546	Stxbp4	1944.14	620.241	0.319032	8.14686e-26
ENSMUSG00000017144	Rnd3	3809.39	1215.83	0.319166	0.00031412
ENSMUSG00000016933	Plcg1	5551.79	1772.34	0.319238	2.46363e-14
ENSMUSG00000052496	Pkdrej	19.2842	6.16564	0.319725	0.00858583
ENSMUSG00000021464	Ror2	220.213	70.4151	0.319759	1.25873e-08
ENSMUSG00000022421	Nptxr	197.263	63.1381	0.32007	0.00203723
ENSMUSG00000024331	Dsc2	17848.7	5713.65	0.320115	3.21232e-35
ENSMUSG00000027339	Rassf2	23503.9	7525.73	0.32019	8.48985e-35
ENSMUSG00000070891	Gm12689	10.9756	3.51448	0.320208	0.0915782
ENSMUSG00000044997	E130304I02Rik	24.6451	7.89227	0.320237	0.00290219
ENSMUSG00000070601	Vmn2r84	8.20063	2.62667	0.320301	0.0681962
ENSMUSG00000041831	Sytl3	523.205	167.663	0.320454	4.66189e-11
ENSMUSG00000053467	A530088E08Rik	73.9136	23.738	0.321159	0.0284073
ENSMUSG00000029510	Gpc2	746.664	240.025	0.321464	0.0529831
ENSMUSG00000038718	Pbx3	1246.51	401.143	0.321814	1.12963e-20
ENSMUSG00000043648	Pld6	21.611	6.95549	0.321849	0.0448773
ENSMUSG00000058402	Zfp420	449	144.59	0.322026	1.51621e-12
ENSMUSG00000039033	Tasp1	1029.73	332.023	0.322438	9.99246e-18
ENSMUSG00000008763	Man1a2	5073.25	1637.52	0.322776	3.88191e-36
ENSMUSG00000029428	Stx2	747.721	241.385	0.322827	1.49579e-14
ENSMUSG00000024968	Rcor2	295.185	95.3746	0.323101	3.98841e-10
ENSMUSG00000032374	Plod2	1861.3	601.57	0.323198	0.000162561
ENSMUSG00000032026	Rexo2	3214.69	1039.72	0.323429	2.85851e-31
ENSMUSG00000004665	Cnn2	5318.45	1720.56	0.323508	1.52051e-36
ENSMUSG00000040043	Rbms2	2866.33	927.614	0.323624	3.08134e-31
ENSMUSG00000028383	Hsdl2	3518.7	1140.2	0.324039	4.94223e-32
ENSMUSG00000032231	Anxa2	22878	7422.46	0.324436	4.95272e-32
ENSMUSG00000062078	Qk	6852.38	2223.33	0.324461	2.57996e-31
ENSMUSG00000005107	Slc2a9	1413.9	458.918	0.324577	1.41033e-21
ENSMUSG00000021253	Tgfb3	1424.37	462.429	0.324656	8.1351e-26
ENSMUSG00000044548	Dact1	1986.31	645.963	0.325207	3.3084e-24
ENSMUSG00000021876	Rnase4	3136.18	1019.94	0.325216	2.34935e-30
ENSMUSG00000001173	Ocrl	2009.48	654.174	0.325544	1.02039e-19
ENSMUSG00000049598	Vsig8	468.808	152.718	0.325757	2.29343e-11
ENSMUSG00000062753	AI413582	2480.09	809.016	0.326204	4.83315e-29
ENSMUSG00000031176	Dynlt3	7654.75	2499.12	0.32648	2.03742e-36
ENSMUSG00000026484	Rnf2	2980.52	973.165	0.326509	1.8278e-19
ENSMUSG00000046269	Usp27x	463.706	151.533	0.326786	7.90006e-12
ENSMUSG00000042109	Csdc2	662.006	216.373	0.326845	2.2102e-12
ENSMUSG00000031506	Ptpn7	514.988	168.426	0.327047	3.11871e-05
ENSMUSG00000048763	Hoxb3	201.955	66.1108	0.327354	3.94253e-08
ENSMUSG00000034471	Caskin2	2247.83	737.45	0.328072	1.54873e-29
ENSMUSG00000046432	Ngfrap1	3627.96	1191.15	0.328326	7.3069e-32
ENSMUSG00000002033	Cd3g	904.008	296.921	0.32845	8.81183e-09
ENSMUSG00000028364	Tnc	161222	52972	0.328566	7.63938e-13
ENSMUSG00000020205	Phlda1	1530.15	502.828	0.328613	9.20158e-06
ENSMUSG00000036867	Smad6	496.87	163.396	0.32885	4.03176e-13
ENSMUSG00000030539	Sema4b	4365.13	1435.94	0.328957	9.4143e-34
ENSMUSG00000022837	Iqcb1	1690.41	556.237	0.329055	1.70164e-15
ENSMUSG00000059824	Dbp	1467.62	483.421	0.329391	1.50566e-18
ENSMUSG00000035863	Palm	702.043	231.343	0.329529	3.76461e-15
ENSMUSG00000026718	Stam	2830.11	933.195	0.329738	5.45238e-29
ENSMUSG00000037653	Kctd8	92.6365	30.5466	0.329747	1.99803e-05
ENSMUSG00000002797	Ggct	330.677	109.05	0.329778	8.76736e-10
ENSMUSG00000061288	Taok3	3274.77	1079.99	0.329792	2.36106e-30
ENSMUSG00000030084	Plxna1	13493.7	4450.95	0.329854	3.58429e-35
ENSMUSG00000025762	Larp1b	251.083	82.8443	0.329947	7.43208e-08
ENSMUSG00000047583	Tyw3	223.841	73.8561	0.329948	7.94907e-09
ENSMUSG00000078863	Gm14325	244.168	80.5881	0.330052	7.93802e-09
ENSMUSG00000036452	Arhgap26	3651.46	1205.49	0.33014	2.3978e-32
ENSMUSG00000032036	Kirrel3	659.436	217.742	0.330193	9.04924e-18
ENSMUSG00000056900	Usp13	356.477	117.707	0.330197	3.29163e-09
ENSMUSG00000040372	Gpr63	496.115	163.953	0.330474	4.73178e-12
ENSMUSG00000035697	Hmha1	1973.81	652.462	0.33056	1.20425e-05
ENSMUSG00000025612	Bach1	10451.3	3456.62	0.330735	1.41402e-19
ENSMUSG00000029090	Gpr125	2102.35	695.444	0.330794	2.85698e-27
ENSMUSG00000056121	Fez2	1200.86	397.298	0.330846	4.69673e-19
ENSMUSG00000029267	Mtf2	4049.99	1340.49	0.330985	2.39125e-22
ENSMUSG00000033295	Ptprf	19004.7	6290.41	0.330993	1.72683e-31
ENSMUSG00000027394	Ttl	1325.7	438.817	0.331009	5.26864e-21
ENSMUSG00000032633	Flcn	2697.57	893.262	0.331136	5.10372e-30
ENSMUSG00000021371	Ccdc90a	1822.95	603.783	0.331212	1.24771e-24
ENSMUSG00000041548	Hspb8	6072.58	2011.86	0.331303	3.73515e-34
ENSMUSG00000030861	Acadsb	4941.55	1640.07	0.331893	1.04233e-33
ENSMUSG00000025429	Pstpip2	4975.21	1651.25	0.331896	2.178e-34
ENSMUSG00000028133	Rwdd3	160.007	53.1121	0.331936	1.70493e-07
ENSMUSG00000045114	Prrt2	14.4361	4.7972	0.332305	0.0218665
ENSMUSG00000025213	Kazald1	762.481	253.453	0.332405	4.10795e-08
ENSMUSG00000069114	Zbtb10	2511.15	835.503	0.332717	0.00751211
ENSMUSG00000028763	Hspg2	11977.8	3986.73	0.332842	2.80532e-30
ENSMUSG00000022911	Arl13b	2788.03	928.23	0.332933	9.18677e-06
ENSMUSG00000078921	Tgtp2	482.068	160.512	0.332965	0.00329007
ENSMUSG00000045038	Prkce	1400.02	466.611	0.33329	5.06452e-21
ENSMUSG00000037001	Zfp39	429.64	143.221	0.333351	1.48027e-11
ENSMUSG00000007827	Ankrd26	706.74	235.663	0.333451	2.17157e-09
ENSMUSG00000005656	Snx6	7952.16	2655.22	0.333899	3.84998e-35
ENSMUSG00000070304	Scn2b	1345.19	449.226	0.333949	2.01701e-21
ENSMUSG00000031700	Gpt2	3703.46	1236.97	0.334003	3.95431e-32
ENSMUSG00000027439	Gzf1	2102.49	702.433	0.334096	1.81844e-25
ENSMUSG00000024906	Mus81	2191.26	732.193	0.334143	4.21532e-27
ENSMUSG00000091154	1700024N20Rik	116.682	38.993	0.33418	7.96467e-07
ENSMUSG00000021379	Id4	1072.38	358.376	0.334186	1.67821e-19
ENSMUSG00000040964	Arhgef10l	13153	4398.57	0.334415	1.54847e-34
ENSMUSG00000040433	Zbtb38	4291.83	1437.01	0.334826	1.27947e-32
ENSMUSG00000048644	Ctxn1	455.56	152.595	0.334962	1.53526e-12
ENSMUSG00000026736	4930426L09Rik	40.3823	13.5283	0.335005	0.000537144
ENSMUSG00000047388	Atmin	3647	1221.83	0.335023	2.24276e-28
ENSMUSG00000001082	Mfsd10	2068.61	693.519	0.335259	1.88231e-25
ENSMUSG00000044986	Tst	2821.91	946.384	0.33537	1.1661e-30
ENSMUSG00000040102	Klhdc5	3175.12	1065.46	0.335564	6.24322e-31
ENSMUSG00000074664	A830092H15Rik	134.39	45.0974	0.335571	2.77211e-06
ENSMUSG00000028229	Fam82b	898.297	301.486	0.335619	1.22775e-16
ENSMUSG00000026482	Rgl1	2008.77	674.458	0.335756	1.82889e-23
ENSMUSG00000049354	Dcaf7	11305.5	3797.53	0.3359	7.37667e-35
ENSMUSG00000018593	Sparc	8869.58	2982.09	0.336215	1.51256e-13
ENSMUSG00000020886	Dlg4	543.396	182.719	0.336254	1.37333e-12
ENSMUSG00000037933	Bicd2	8021.16	2698.85	0.336467	6.72432e-35
ENSMUSG00000028957	Per3	1411.08	475.609	0.337052	5.87322e-22
ENSMUSG00000050945	Zfp438	748.489	252.617	0.337503	1.07838e-15
ENSMUSG00000062646	Ganc	2776.67	937.187	0.337522	5.46142e-21
ENSMUSG00000004936	Map2k1	11393.1	3849.59	0.337888	1.48181e-34
ENSMUSG00000074994	Qser1	5068.02	1712.73	0.337949	8.03066e-19
ENSMUSG00000029299	Abcg3	263.187	88.961	0.338015	0.00316851
ENSMUSG00000055322	Tns1	5861.87	1982.81	0.338257	8.11467e-32
ENSMUSG00000021262	Evl	4240.81	1434.83	0.338338	1.94863e-32
ENSMUSG00000026782	Abi2	4448.69	1505.31	0.338371	7.82266e-32
ENSMUSG00000040699	Limd2	2647.75	896.651	0.338646	3.05221e-28
ENSMUSG00000033467	Crlf2	508.148	172.188	0.338854	7.66539e-13
ENSMUSG00000037709	Fam13a	1934.86	656.562	0.339334	1.23099e-25
ENSMUSG00000033707	Lrrc24	234.806	79.688	0.339378	3.07563e-07
ENSMUSG00000025025	Mxi1	2067.36	702.433	0.339774	1.22394e-24
ENSMUSG00000073295	Nudt11	497.286	169.019	0.339884	6.64586e-11
ENSMUSG00000051510	Mafg	6383.45	2170.73	0.340056	6.87291e-20
ENSMUSG00000030064	Frmd4b	2490.37	847.048	0.340129	6.22823e-26
ENSMUSG00000028517	Ppap2b	5214.98	1773.94	0.340163	1.97671e-33
ENSMUSG00000035692	Isg15	4114.89	1401.44	0.340577	3.60571e-08
ENSMUSG00000038070	Cntln	2515.29	857.285	0.340829	7.22802e-14
ENSMUSG00000020877	Scrn2	1742.69	594.247	0.340994	1.22717e-20
ENSMUSG00000042155	Klhl23	1054.47	359.61	0.341033	1.29743e-16
ENSMUSG00000030562	Nox4	164.467	56.0969	0.341084	0.00325849
ENSMUSG00000040213	Ccbl2	856.954	292.314	0.341108	2.95006e-14
ENSMUSG00000049281	Scn3b	755.463	257.736	0.341162	8.02868e-22
ENSMUSG00000021287	Xrcc3	1202.59	410.337	0.341211	5.61098e-20
ENSMUSG00000022528	Hes1	1089.03	371.665	0.34128	1.80151e-20
ENSMUSG00000061981	Flot2	3839.45	1310.43	0.341306	2.4609e-31
ENSMUSG00000040997	Abhd4	3014.6	1028.99	0.341336	3.6885e-29
ENSMUSG00000034667	Xpot	7532.45	2571.77	0.341425	8.0714e-34
ENSMUSG00000031865	Dctn1	13847.1	4732.04	0.341736	5.971e-33
ENSMUSG00000078380	Gm6096	11.5101	3.93389	0.341779	0.0389836
ENSMUSG00000030600	Lrfn1	147.017	50.2528	0.341815	0.0159754
ENSMUSG00000038368	BC057079	2248.57	768.618	0.341825	3.6456e-23
ENSMUSG00000051242	Pcdhb9	34.5518	11.8139	0.341919	0.0198924
ENSMUSG00000073785	Krtap5-5	7.70935	2.63892	0.342301	0.0916167
ENSMUSG00000041935	AW549877	4053.52	1388.66	0.342582	1.40497e-30
ENSMUSG00000039286	Fndc3b	4724.65	1619.36	0.342748	5.24414e-21
ENSMUSG00000067787	Blcap	3101.91	1063.25	0.342771	8.04879e-29
ENSMUSG00000022106	Rcbtb2	6420.03	2202.54	0.343073	6.52414e-33
ENSMUSG00000029469	Ift81	1826	626.52	0.343111	1.9824e-23
ENSMUSG00000042726	Trafd1	10770.1	3696.47	0.343215	1.72694e-18
ENSMUSG00000031834	Pik3r2	7926.52	2724.07	0.343665	1.64613e-33
ENSMUSG00000049687	Fam109b	77.7738	26.7351	0.343755	1.93679e-05
ENSMUSG00000034850	Tmem127	8272.85	2844.08	0.343784	1.24657e-33
ENSMUSG00000020766	Galk1	1734.67	597.112	0.344222	1.95577e-15
ENSMUSG00000026692	Fmo4	106.916	36.8102	0.34429	0.0807454
ENSMUSG00000015879	Fam184b	90.0774	31.015	0.344315	0.00248129
ENSMUSG00000069835	Sat2	142.245	49.0068	0.344523	1.53184e-06
ENSMUSG00000001473	Tubb6	9368.42	3227.83	0.344543	5.2969e-22
ENSMUSG00000021540	Smad5	6816.6	2349.89	0.344731	2.79114e-33
ENSMUSG00000090599	AL626783.1	591.953	204.091	0.344776	1.52701e-13
ENSMUSG00000021062	Rab15	9941.26	3429.04	0.34493	1.94911e-33
ENSMUSG00000048355	Arxes1	157.065	54.1867	0.344996	2.02321e-06
ENSMUSG00000030217	Art4	406.388	140.423	0.345539	0.00010844
ENSMUSG00000071064	Zfp827	1861.45	643.275	0.345578	7.1002e-24
ENSMUSG00000026637	Traf5	684.098	236.526	0.345749	6.14292e-14
ENSMUSG00000027860	Vangl1	2188.59	756.779	0.345783	2.81312e-26
ENSMUSG00000053553	3110082I17Rik	569.04	196.817	0.345875	1.50736e-11
ENSMUSG00000034212	Ankmy1	531.903	183.977	0.345886	2.73822e-10
ENSMUSG00000056999	Ide	12802.6	4431.33	0.346128	3.4952e-33
ENSMUSG00000052684	Jun	52528.5	18185.8	0.346208	0.000723227
ENSMUSG00000060594	Layn	143.681	49.8211	0.346748	0.000562197
ENSMUSG00000062861	Zfp28	537.555	186.42	0.346793	8.12874e-13
ENSMUSG00000059975	Zfp74	627.546	217.693	0.346895	2.10777e-13
ENSMUSG00000028518	Prkaa2	2693.84	934.53	0.346913	2.27092e-25
ENSMUSG00000026571	Dcaf6	1987.37	689.741	0.347061	4.73668e-24
ENSMUSG00000060519	Tor3a	2045.88	710.415	0.347241	1.24865e-25
ENSMUSG00000039046	Usp6nl	2331.85	809.809	0.347282	1.85457e-26
ENSMUSG00000019854	Reps1	8580.39	2979.85	0.347286	4.90738e-33
ENSMUSG00000045284	Dcaf12l1	1356.84	471.295	0.347349	1.28673e-18
ENSMUSG00000026383	Epb4.1l5	3450.79	1199.68	0.347653	1.70507e-28
ENSMUSG00000004085	B230120H23Rik	4640.98	1614.02	0.347775	3.65583e-22
ENSMUSG00000030498	Gas2	698.61	242.986	0.347813	8.08363e-12
ENSMUSG00000028576	Ift74	1924.94	669.866	0.347993	3.37487e-22
ENSMUSG00000091337	Eid1	5706.31	1986.19	0.34807	1.18583e-31
ENSMUSG00000032966	Fkbp1a	14446.7	5030.99	0.348244	1.8502e-32
ENSMUSG00000029405	G3bp2	15761.1	5491.4	0.348415	5.21012e-32
ENSMUSG00000049791	Fzd4	286.11	99.7157	0.348522	1.88342e-08
ENSMUSG00000026546	Ccdc19	740.104	257.947	0.348528	6.59261e-14
ENSMUSG00000022307	Oxr1	5486.92	1912.79	0.34861	6.49592e-32
ENSMUSG00000022186	Oxct1	8543.93	2979.23	0.348695	1.08433e-32
ENSMUSG00000043079	Synpo	4203.13	1466.08	0.348807	7.6986e-19
ENSMUSG00000041417	Pik3r1	8121.43	2835.48	0.349135	9.41687e-33
ENSMUSG00000027506	Tpd52	7701.91	2691.66	0.34948	1.25308e-32
ENSMUSG00000022372	Sla	1032.93	361.195	0.349679	1.53394e-09
ENSMUSG00000032558	Nphp3	1693.2	592.441	0.349894	3.11652e-10
ENSMUSG00000050295	Foxc1	1279.71	447.817	0.349937	2.32675e-19
ENSMUSG00000035215	Lsm7	91.1195	31.9273	0.350389	1.89995e-05
ENSMUSG00000026930	Gpsm1	1136.83	398.664	0.350681	2.90152e-18
ENSMUSG00000029461	Fam168a	4597.29	1613.61	0.350992	7.97241e-31
ENSMUSG00000030336	Cd27	397.107	139.434	0.351125	0.000209556
ENSMUSG00000053436	Mapk14	5722.81	2010.76	0.351358	9.56017e-24
ENSMUSG00000040022	Rab11fip2	2306.95	811.052	0.351569	1.0301e-14
ENSMUSG00000039473	Ubn1	9846.49	3464.06	0.351807	2.10798e-32
ENSMUSG00000031310	Zmym3	3465.21	1219.18	0.351835	1.98356e-15
ENSMUSG00000030201	Lrp6	15862	5582.7	0.351954	7.75743e-31
ENSMUSG00000038143	Stox2	4631.33	1630.98	0.352163	4.1843e-31
ENSMUSG00000027475	Kif3b	7157.21	2520.64	0.352182	7.07285e-32
ENSMUSG00000063145	Bbs5	793.875	279.652	0.352262	1.46667e-13
ENSMUSG00000031502	Col4a1	33737.3	11889	0.3524	1.34899e-17
ENSMUSG00000014353	Tmem87b	3411.44	1202.53	0.352499	6.08273e-28
ENSMUSG00000002325	Irf9	5478.4	1932.01	0.352659	1.69946e-31
ENSMUSG00000044217	Aqp5	322.611	113.786	0.352703	3.48491e-09
ENSMUSG00000022995	Enah	9784.04	3455.4	0.353166	4.21593e-32
ENSMUSG00000022199	Slc22a17	1101.66	389.287	0.353365	9.87144e-05
ENSMUSG00000045008	9030612E09Rik	17.3191	6.12891	0.353882	0.0561341
ENSMUSG00000052364	B630019K06Rik	243.617	86.2486	0.354034	4.87162e-08
ENSMUSG00000030319	Cand2	423.723	150.03	0.354075	9.4444e-11
ENSMUSG00000068969	Rpl32-ps	12.4278	4.40228	0.354227	0.035296
ENSMUSG00000036622	Atp13a2	4654.98	1649.95	0.354448	1.17299e-30
ENSMUSG00000021311	Mtr	1344.89	476.937	0.354629	1.32541e-18
ENSMUSG00000036093	Arl5a	3991.05	1415.55	0.354682	6.37834e-29
ENSMUSG00000062040	Zfp27	482.062	170.982	0.354689	6.30508e-11
ENSMUSG00000074682	Zcchc3	461.077	163.644	0.354916	7.112e-11
ENSMUSG00000062488	I830012O16Rik	534.737	189.788	0.354918	0.000351282
ENSMUSG00000026181	Ppm1f	1885.65	669.321	0.354955	2.20705e-23
ENSMUSG00000031101	Sash3	601.362	213.719	0.355391	3.60726e-10
ENSMUSG00000013236	Ptprs	10512.6	3736.95	0.355474	2.80858e-31
ENSMUSG00000034278	Dnajc17	978.268	347.881	0.355609	8.31112e-16
ENSMUSG00000032184	Lysmd2	470.384	167.443	0.35597	1.1941e-10
ENSMUSG00000031402	Mpp1	2771.2	986.883	0.356122	1.31538e-25
ENSMUSG00000033233	Trim45	297.453	105.967	0.356248	1.22291e-08
ENSMUSG00000038623	Tm6sf1	339.968	121.173	0.356425	1.00091e-08
ENSMUSG00000005871	Apc	10050.5	3583.04	0.356503	9.10214e-28
ENSMUSG00000026956	Uap1l1	796.558	284.137	0.356706	1.89996e-10
ENSMUSG00000051444	Bbs12	337.257	120.334	0.356802	1.75763e-09
ENSMUSG00000033282	Rpgrip1l	1377.43	491.595	0.356892	1.00658e-18
ENSMUSG00000030814	Bcl7c	3975.69	1419.16	0.35696	4.3979e-25
ENSMUSG00000001100	Poldip2	3688.03	1316.48	0.35696	4.53621e-28
ENSMUSG00000031230	Fgf16	63.6994	22.74	0.356989	0.000107203
ENSMUSG00000027630	Tbl1xr1	8075.39	2884.42	0.357186	1.49851e-31
ENSMUSG00000027163	Commd9	1862.18	665.363	0.357304	7.75338e-22
ENSMUSG00000070814	6330408A02Rik	653.584	233.578	0.35738	6.6195e-13
ENSMUSG00000044991	1110034G24Rik	404.061	144.504	0.357629	3.77903e-10
ENSMUSG00000005625	Psmd4	10023.6	3585.08	0.357664	2.84484e-31
ENSMUSG00000069089	Cdk7	3355.54	1200.47	0.357757	4.37421e-27
ENSMUSG00000048402	Gli2	743.926	266.194	0.357823	4.64802e-12
ENSMUSG00000008167	Fbxw9	1731.33	619.583	0.357865	4.36712e-16
ENSMUSG00000025932	Eya1	4965.55	1777.23	0.357913	6.47273e-31
ENSMUSG00000039262	Prrc2b	14764.3	5285.26	0.357976	1.89836e-29
ENSMUSG00000031379	Pir	515.42	184.556	0.358069	6.80219e-11
ENSMUSG00000049421	Zfp260	3293.3	1179.38	0.358115	1.63004e-27
ENSMUSG00000039067	Psmd7	9551.74	3422.33	0.358294	2.62274e-31
ENSMUSG00000020491	2810021J22Rik	522.871	187.565	0.358722	3.00453e-11
ENSMUSG00000075595	Zfp652	5170.21	1857.1	0.359193	2.02817e-30
ENSMUSG00000031644	Nek1	2927.94	1052.12	0.359338	3.90004e-26
ENSMUSG00000069808	Fam57a	1802.66	647.852	0.359387	2.05122e-21
ENSMUSG00000028266	Lmo4	2354.07	846.206	0.359466	1.15278e-24
ENSMUSG00000039633	Lonrf1	4937.75	1775.38	0.359552	6.80852e-30
ENSMUSG00000029207	Apbb2	1820.69	654.918	0.359709	2.19416e-20
ENSMUSG00000051586	Mical3	6081.87	2189.8	0.360054	9.55152e-31
ENSMUSG00000074178	Gm10638	94.7743	34.1468	0.360296	1.67705e-05
ENSMUSG00000021624	Cd180	493.324	177.763	0.360337	2.05575e-12
ENSMUSG00000034485	Uaca	2812.11	1013.54	0.360422	1.69641e-24
ENSMUSG00000031099	Smarca1	897.401	323.513	0.3605	7.63455e-13
ENSMUSG00000022469	Rapgef3	412.37	148.707	0.360616	2.07343e-06
ENSMUSG00000053931	Cnn3	36558.9	13186.9	0.360702	3.89309e-24
ENSMUSG00000023460	Rab12	3881.76	1401.86	0.361141	1.42229e-27
ENSMUSG00000002365	Snx9	8713.28	3147.73	0.361257	6.82207e-31
ENSMUSG00000026737	Pip4k2a	4336.32	1567.36	0.36145	6.86833e-29
ENSMUSG00000029033	Acap3	1645.38	594.749	0.361466	5.29263e-22
ENSMUSG00000008393	Carhsp1	5560.67	2010.99	0.361646	3.46115e-30
ENSMUSG00000071180	2810008M24Rik	2419.71	875.17	0.361683	1.9987e-23
ENSMUSG00000000295	Hddc2	490.548	177.518	0.361877	1.50342e-10
ENSMUSG00000023009	Nckap5l	1375.15	497.639	0.361878	1.40944e-19
ENSMUSG00000034898	Filip1	469.337	169.895	0.361989	5.12503e-10
ENSMUSG00000026003	Acadl	5237.31	1896.45	0.362103	4.67884e-29
ENSMUSG00000025040	Fundc1	2456.42	889.57	0.36214	6.57259e-24
ENSMUSG00000036334	Igsf10	2384.65	863.708	0.362195	4.80612e-07
ENSMUSG00000039497	Dse	1346.83	487.885	0.362246	1.8059e-18
ENSMUSG00000038195	Rilp	129.558	46.9587	0.362452	6.06244e-06
ENSMUSG00000024276	Zfp397	3743.9	1357.17	0.362502	1.8177e-27
ENSMUSG00000040928	S100pbp	2126.84	771.254	0.362628	2.17222e-22
ENSMUSG00000028228	Cpne3	5488.6	1991.31	0.362808	3.89728e-30
ENSMUSG00000031955	Bcar1	1644.8	596.837	0.362862	2.73937e-22
ENSMUSG00000024588	Fech	2486.73	902.394	0.362884	2.3884e-24
ENSMUSG00000040139	9430038I01Rik	235.411	85.4465	0.362968	8.5614e-08
ENSMUSG00000035877	Zhx3	1203.25	436.793	0.363012	1.76999e-17
ENSMUSG00000071586	Gm10337	23.0633	8.3729	0.36304	0.0306004
ENSMUSG00000019975	Ikbip	1078.54	391.61	0.363094	2.58354e-16
ENSMUSG00000045968	5830403L16Rik	411.263	149.353	0.363157	1.0821e-07
ENSMUSG00000069986	Gm8054	9.6097	3.48999	0.363173	0.0724836
ENSMUSG00000028710	Atpaf1	2080.52	756.051	0.363394	2.66724e-22
ENSMUSG00000031875	Cmtm3	813.791	295.991	0.363718	3.73454e-15
ENSMUSG00000025089	Gfra1	1042.91	379.916	0.364284	1.43661e-15
ENSMUSG00000043881	Kbtbd7	1821.49	663.698	0.364371	1.93045e-21
ENSMUSG00000037029	Zfp146	2514.68	916.342	0.364398	7.75082e-25
ENSMUSG00000060572	Mfap2	55.245	20.1623	0.364962	0.000399839
ENSMUSG00000034168	6430527G18Rik	1493.74	545.88	0.365446	1.05885e-11
ENSMUSG00000028633	Ctps	4748.54	1736.2	0.365627	4.8142e-13
ENSMUSG00000010751	Tnfrsf22	258.841	94.6705	0.365747	3.99939e-08
ENSMUSG00000067336	Bmpr2	2655.42	971.671	0.36592	8.52078e-17
ENSMUSG00000033970	Rfc3	1427.58	522.418	0.365946	9.7366e-19
ENSMUSG00000090083	Rnf8	1998.68	731.596	0.366039	2.8593e-22
ENSMUSG00000026620	Mark1	2280.65	835.84	0.366492	1.5427e-22
ENSMUSG00000025477	Inpp5a	4803.57	1760.57	0.366513	2.44998e-28
ENSMUSG00000037552	Plekhg2	3938.85	1444.07	0.366623	2.03136e-11
ENSMUSG00000021109	Hif1a	19096	7003.64	0.36676	1.65087e-17
ENSMUSG00000028035	Dnajb4	1890.58	693.488	0.366812	6.33019e-05
ENSMUSG00000029050	Ski	6158.25	2259.45	0.366899	1.00565e-29
ENSMUSG00000023191	Leprel2	800.186	293.667	0.366998	1.13854e-15
ENSMUSG00000043102	Qrfp	141.797	52.0406	0.367008	9.54165e-06
ENSMUSG00000044876	Zfp444	1175.05	431.28	0.367033	9.91832e-18
ENSMUSG00000024462	Gabbr1	2518.3	924.311	0.367038	0.000395242
ENSMUSG00000035840	Lysmd3	1673.47	614.777	0.367366	1.08531e-10
ENSMUSG00000037306	Man1c1	682.057	250.606	0.367426	1.18197e-12
ENSMUSG00000002319	Ipo4	7006.26	2575.04	0.367534	1.69395e-29
ENSMUSG00000059689	Zfp637	968.102	355.948	0.367676	6.46156e-16
ENSMUSG00000025610	ORF63	1241.48	456.729	0.367892	7.35502e-11
ENSMUSG00000038486	Sv2a	154.247	56.7521	0.367931	3.05209e-06
ENSMUSG00000001305	Rrp15	852.478	313.735	0.368027	6.81388e-14
ENSMUSG00000033808	Tmem87a	5029.39	1851.12	0.368061	3.84494e-22
ENSMUSG00000053930	Shisa6	1307.51	481.321	0.368119	1.48708e-15
ENSMUSG00000036916	Zfp280c	1157.78	426.357	0.368255	4.31263e-06
ENSMUSG00000009681	Bcr	7266.66	2676.23	0.368289	1.20749e-29
ENSMUSG00000044847	Lsm11	672.598	247.722	0.368306	1.66061e-12
ENSMUSG00000028173	Wls	10576.2	3897.73	0.368539	8.91258e-30
ENSMUSG00000006299	Aamp	10808.4	3984.83	0.368678	1.34033e-29
ENSMUSG00000032640	Chsy1	1169.67	431.825	0.369186	6.02258e-17
ENSMUSG00000029007	Agtrap	2319.58	856.373	0.369193	7.41568e-23
ENSMUSG00000053091	Lins	745.087	275.112	0.369235	4.94726e-13
ENSMUSG00000059482	2610301B20Rik	1695.1	626.021	0.369312	1.87791e-19
ENSMUSG00000029032	Arhgef16	8107.25	2995.7	0.369508	1.5049e-29
ENSMUSG00000022329	Stk3	2390.47	883.763	0.369703	1.91287e-22
ENSMUSG00000027984	Hadh	8836.58	3267.2	0.369736	1.40884e-29
ENSMUSG00000032012	Pvrl1	14172.4	5247.23	0.370244	1.22074e-27
ENSMUSG00000023147	Wrb	726.979	269.292	0.370427	1.83508e-12
ENSMUSG00000069184	Zfp72	71.9217	26.6494	0.370534	0.000149775
ENSMUSG00000037270	4932438A13Rik	12456.1	4618.41	0.370776	5.45328e-22
ENSMUSG00000020102	Slc16a7	445.178	165.098	0.370858	1.5286e-09
ENSMUSG00000074824	Zfp708	71.0902	26.3647	0.370863	0.000125111
ENSMUSG00000047843	Bri3	2116.03	784.819	0.370892	1.33372e-15
ENSMUSG00000039405	Prss23	141.5	52.4845	0.370915	0.000130001
ENSMUSG00000038290	Smg6	3438.56	1277.11	0.371408	1.9265e-26
ENSMUSG00000046658	Zfp316	1605.96	597.042	0.371765	5.4227e-20
ENSMUSG00000041673	Lrrc18	240.173	89.3314	0.371947	2.14931e-07
ENSMUSG00000057541	Pus7	2289.82	851.952	0.372061	6.93952e-22
ENSMUSG00000038740	Fam125b	2656.32	988.668	0.372194	8.53286e-24
ENSMUSG00000031969	Acad8	1506.07	560.654	0.372264	1.23411e-18
ENSMUSG00000072829	Gm7292	2462.62	917.043	0.372385	1.61043e-23
ENSMUSG00000044148	1810030O07Rik	3457.61	1287.72	0.372431	1.33142e-25
ENSMUSG00000032666	1700025G04Rik	9498.73	3538.64	0.372538	4.62146e-29
ENSMUSG00000014980	Tsen15	916.534	341.468	0.372564	1.45608e-13
ENSMUSG00000043895	S1pr2	1142.01	425.607	0.372684	1.27064e-17
ENSMUSG00000014426	Map3k4	3683.53	1372.82	0.372692	9.62489e-27
ENSMUSG00000090150	Acad11	4213.37	1570.75	0.372802	3.80287e-27
ENSMUSG00000031066	Usp11	4028.53	1502.4	0.37294	4.93447e-27
ENSMUSG00000053483	Usp21	1814.63	676.843	0.372992	3.37176e-16
ENSMUSG00000031095	Cul4b	5307.17	1980.65	0.373203	7.45346e-18
ENSMUSG00000049823	Zbtb12	1144.15	427.04	0.373236	2.96747e-16
ENSMUSG00000002741	Ykt6	8595	3209.02	0.373359	5.15744e-29
ENSMUSG00000031987	Egln1	3192.01	1191.81	0.373373	7.75408e-26
ENSMUSG00000032252	Glce	2195.09	820.095	0.373604	2.07362e-22
ENSMUSG00000073422	H2-Ke6	2534.28	946.984	0.373669	4.80995e-24
ENSMUSG00000052419	2610001J05Rik	1421.17	532.03	0.374361	3.89121e-18
ENSMUSG00000029714	Gigyf1	3365.37	1259.95	0.374387	4.00921e-07
ENSMUSG00000036186	Fam69b	163.71	61.3258	0.374599	3.87515e-06
ENSMUSG00000020520	Galnt10	4111.36	1541.19	0.374863	2.56134e-26
ENSMUSG00000028497	Ptplad2	421.256	157.946	0.374941	1.59828e-08
ENSMUSG00000036676	Tmtc3	4376.89	1641.16	0.374959	1.66927e-26
ENSMUSG00000021395	Spin1	9067.16	3400.69	0.375056	8.79147e-29
ENSMUSG00000023092	Fhl1	1509.32	566.293	0.375197	2.33721e-15
ENSMUSG00000030417	Pdcd5	3139.11	1178.59	0.375454	2.25394e-24
ENSMUSG00000041779	Tram2	446.106	167.602	0.3757	2.70093e-06
ENSMUSG00000039156	Stim2	3601.8	1353.26	0.375717	5.27996e-26
ENSMUSG00000020000	Moxd1	361.174	135.809	0.376023	8.39286e-06
ENSMUSG00000046179	E2f8	1248.2	469.474	0.376121	1.30143e-14
ENSMUSG00000024594	Prrc1	2257.43	849.393	0.376265	1.11195e-22
ENSMUSG00000034071	Zfp551	174.065	65.5199	0.37641	1.28911e-06
ENSMUSG00000028399	Ptprd	2562.62	965.337	0.376699	1.14974e-07
ENSMUSG00000020364	Zfp354a	65.2596	24.5891	0.376789	0.000233743
ENSMUSG00000025264	Tsr2	1362.7	513.882	0.377106	1.63746e-17
ENSMUSG00000058230	Grlf1	6494.62	2449.54	0.377164	4.25219e-28
ENSMUSG00000020716	Nf1	6048.65	2284.32	0.377658	5.94499e-19
ENSMUSG00000001576	Ergic1	3562.65	1345.69	0.377722	1.77894e-25
ENSMUSG00000027438	Napb	287.227	108.52	0.37782	1.05419e-07
ENSMUSG00000027935	Rab13	391.936	148.107	0.377886	5.66876e-10
ENSMUSG00000032348	Gsta4	4816.92	1820.81	0.378003	9.38742e-18
ENSMUSG00000029291	Rufy3	4999.81	1890.7	0.378154	3.80778e-27
ENSMUSG00000042507	C130039O16Rik	4289.54	1622.23	0.378182	1.87946e-19
ENSMUSG00000033009	Ogfod1	1548.05	585.54	0.378244	6.18737e-19
ENSMUSG00000031591	Asah1	5431.81	2055.99	0.378509	3.01371e-27
ENSMUSG00000038855	Itpkb	2738.09	1036.99	0.378729	1.49319e-23
ENSMUSG00000050875	A730017C20Rik	716.425	271.374	0.378789	3.56425e-13
ENSMUSG00000055835	Zfp1	744.293	282.003	0.378887	5.87891e-13
ENSMUSG00000079017	Ifi27l2a	1567.98	594.091	0.378888	6.82781e-10
ENSMUSG00000091558	Gm17227	20.9039	7.929	0.379308	0.0590563
ENSMUSG00000022847	Thpo	78.4973	29.7935	0.379548	0.0257453
ENSMUSG00000042694	Obfc1	585.431	222.233	0.379605	2.36803e-11
ENSMUSG00000000296	Tpd52l1	294.16	111.839	0.380198	2.30617e-07
ENSMUSG00000079716	Map3k4	2181.97	829.876	0.380333	3.09699e-22
ENSMUSG00000024269	5730494M16Rik	977.302	372.296	0.380943	3.14328e-14
ENSMUSG00000046785	Epm2aip1	3758.23	1432.14	0.381067	2.23731e-25
ENSMUSG00000029333	Rasgef1b	5238.21	1996.13	0.381071	3.65997e-05
ENSMUSG00000059602	Syn3	322.827	123.059	0.381192	1.1788e-08
ENSMUSG00000028708	Mknk1	3870.6	1476.9	0.381567	7.22303e-26
ENSMUSG00000040124	Gorab	802.815	306.387	0.381641	7.70974e-13
ENSMUSG00000041491	Cep78	881.707	336.536	0.381687	7.81565e-14
ENSMUSG00000058174	Gm5148	26.5238	10.124	0.381695	0.0069614
ENSMUSG00000043639	Rbm20	2163.1	825.728	0.381734	1.59067e-21
ENSMUSG00000057143	Trim12c	1904.49	727.292	0.381883	3.97442e-13
ENSMUSG00000063275	Ptpla	348.913	133.247	0.381892	5.34873e-08
ENSMUSG00000026581	Sell	163.03	62.2626	0.381909	0.00735963
ENSMUSG00000024213	Nudt3	6652.46	2540.73	0.381923	1.28876e-27
ENSMUSG00000018554	Ybx2	416.527	159.165	0.382124	3.34926e-09
ENSMUSG00000017485	Top2b	13009.1	4971.34	0.382145	7.90744e-22
ENSMUSG00000023921	Mut	2498.18	954.796	0.382197	7.94626e-22
ENSMUSG00000036840	Siah1a	1118.59	427.744	0.382397	8.19971e-16
ENSMUSG00000022051	Bnip3l	32531	12443.1	0.382501	2.39089e-22
ENSMUSG00000042275	Pelo	1352.99	517.605	0.382563	1.1133e-17
ENSMUSG00000032855	Pkd1	5708.97	2185.47	0.382814	3.37897e-16
ENSMUSG00000034460	Six4	3185.22	1219.9	0.382987	2.03525e-24
ENSMUSG00000025241	Fyco1	4489.67	1721.34	0.383401	1.536e-26
ENSMUSG00000028522	Mier1	4439.48	1702.27	0.38344	2.84213e-10
ENSMUSG00000009569	Mkl2	4433.99	1701.4	0.383717	1.36085e-26
ENSMUSG00000037822	1110003E01Rik	4471.82	1716.01	0.383739	5.76673e-26
ENSMUSG00000022102	Dok2	173.703	66.6771	0.383856	3.80689e-06
ENSMUSG00000074925	Ptar1	378.715	145.428	0.384005	4.58684e-07
ENSMUSG00000062704	9430002A10Rik	9.11843	3.50223	0.384083	0.095338
ENSMUSG00000040734	Ppp1r13l	1168.72	449.171	0.384326	4.21654e-07
ENSMUSG00000052102	Gnpda1	1570.35	603.777	0.384486	2.45797e-17
ENSMUSG00000028672	Hmgcl	1224.14	470.965	0.384732	1.30392e-16
ENSMUSG00000030161	Gabarapl1	3648.89	1404.4	0.384884	4.60222e-24
ENSMUSG00000026249	Serpine2	2580.02	993.425	0.385046	1.16447e-20
ENSMUSG00000023022	Lima1	24597.5	9473.38	0.385136	3.43164e-22
ENSMUSG00000039741	Bahcc1	1700.03	655.199	0.385404	3.3801e-16
ENSMUSG00000040434	Gyltl1b	1430.49	551.381	0.385451	4.0444e-13
ENSMUSG00000001211	Agpat3	14585.1	5628.04	0.385877	2.28443e-26
ENSMUSG00000037747	Phyhipl	301.291	116.287	0.385962	4.9128e-07
ENSMUSG00000008999	Bmp7	4542.78	1754.03	0.386114	2.09994e-26
ENSMUSG00000026791	Slc2a8	903.97	349.103	0.386188	1.78415e-10
ENSMUSG00000032018	Sc5d	5253.66	2029.62	0.386326	3.81884e-26
ENSMUSG00000001802	Lrp3	221.083	85.4343	0.386436	5.70661e-07
ENSMUSG00000029832	Nfe2l3	7511.95	2903	0.386451	5.55609e-27
ENSMUSG00000040785	Ttc3	13901	5372.42	0.386477	4.19662e-26
ENSMUSG00000025060	Slk	8931.11	3452.66	0.386587	1.01089e-20
ENSMUSG00000035208	Slfn8	519.2	200.797	0.386742	0.00150006
ENSMUSG00000038241	Cep250	3341.43	1292.8	0.386901	1.755e-10
ENSMUSG00000058013	Sept11	8843.21	3422.14	0.386979	3.36652e-27
ENSMUSG00000028128	F3	484.606	187.642	0.387205	0.00962364
ENSMUSG00000038181	Chpf2	2240.26	868	0.387454	1.26687e-21
ENSMUSG00000000340	Dbt	2648.62	1026.38	0.387514	1.15839e-21
ENSMUSG00000020639	Pfn4	29.2988	11.3578	0.387653	0.00817638
ENSMUSG00000020776	Fbf1	3795.82	1472.21	0.38785	6.78263e-23
ENSMUSG00000038305	Spats2l	4329.95	1679.43	0.387864	1.24859e-25
ENSMUSG00000061024	Rrs1	2191.04	850.244	0.388054	1.40344e-20
ENSMUSG00000015839	Nfe2l2	4604.69	1787.29	0.388145	8.1635e-26
ENSMUSG00000057963	Itpk1	2246.99	872.457	0.388278	2.12882e-21
ENSMUSG00000039987	Phtf2	1601.85	622.302	0.38849	3.75139e-12
ENSMUSG00000053730	Tmem39b	447.488	173.866	0.388537	6.37539e-10
ENSMUSG00000042215	Bag2	194.672	75.7174	0.388949	1.28866e-06
ENSMUSG00000042388	Dlgap3	1911.96	743.777	0.389013	3.79586e-18
ENSMUSG00000053560	Ier2	10687.6	4157.8	0.389031	0.00103583
ENSMUSG00000032527	Pccb	5267.93	2049.8	0.38911	5.87203e-26
ENSMUSG00000032415	Ube2cbp	186.768	72.6836	0.389164	4.98751e-06
ENSMUSG00000005442	Cic	12316.9	4794.19	0.389236	8.17325e-26
ENSMUSG00000059714	Flot1	3931.02	1530.43	0.38932	5.08746e-25
ENSMUSG00000024962	Vegfb	922.742	359.374	0.389463	1.80975e-14
ENSMUSG00000024661	Fth1	47917.1	18668.9	0.389608	8.49296e-19
ENSMUSG00000042364	Snx18	4533.02	1767.03	0.389813	2.10363e-25
ENSMUSG00000003923	Tfam	3438.5	1340.42	0.389828	5.25725e-24
ENSMUSG00000049047	Armcx3	2208.55	861.069	0.389879	7.49226e-21
ENSMUSG00000044022	Pcdhb21	64.8926	25.33	0.390337	0.00586208
ENSMUSG00000063808	Gpatch1	1403.26	547.781	0.390363	4.34484e-17
ENSMUSG00000041936	Agrn	13337.7	5208.68	0.390524	3.69036e-06
ENSMUSG00000021820	Camk2g	3224.82	1259.81	0.39066	5.50405e-23
ENSMUSG00000048960	Prex2	1048.47	409.688	0.390747	4.13955e-10
ENSMUSG00000035199	Arl6ip5	5761.4	2251.66	0.390819	4.77363e-26
ENSMUSG00000037119	D15Ertd621e	13478.8	5267.98	0.390835	3.91384e-26
ENSMUSG00000036197	Gxylt1	4542.46	1775.88	0.390952	3.07006e-25
ENSMUSG00000039989	Cbx4	4601.34	1799.04	0.390981	2.11304e-25
ENSMUSG00000043850	Clrn1	436.68	170.746	0.391009	2.42579e-09
ENSMUSG00000042684	Npl	3335.43	1304.36	0.391062	5.76574e-21
ENSMUSG00000002617	Zfp40	611.577	239.174	0.391078	2.19883e-10
ENSMUSG00000036819	Jmjd4	1085.52	425.05	0.391564	1.16539e-14
ENSMUSG00000041878	8430432A02Rik	10.101	3.95838	0.39188	0.0825313
ENSMUSG00000091454	Dynlt1b	216.818	85.067	0.392343	1.74695e-06
ENSMUSG00000052142	Rasal3	710.783	279.015	0.392546	0.00920612
ENSMUSG00000043391	2510009E07Rik	1716.74	673.932	0.392566	6.46058e-18
ENSMUSG00000031150	Ccdc120	1602.43	629.196	0.392651	1.46757e-18
ENSMUSG00000047193	Dync2h1	4006.21	1573.26	0.392704	2.43564e-17
ENSMUSG00000050199	Lgr4	6366.67	2500.35	0.392725	2.30758e-22
ENSMUSG00000003573	Homer3	1725.64	677.994	0.392895	6.87418e-20
ENSMUSG00000024079	Eif2ak2	4136.02	1625.03	0.392897	1.23571e-08
ENSMUSG00000059363	Fxn	476.787	187.345	0.392932	2.1959e-09
ENSMUSG00000063179	Pstk	462.464	181.773	0.393054	4.18104e-09
ENSMUSG00000022468	Endou	751.624	295.504	0.393154	2.50606e-06
ENSMUSG00000047307	Pcdhb13	39.9558	15.7111	0.393211	0.00195214
ENSMUSG00000029290	Zfp326	2500.61	983.304	0.393225	1.92224e-21
ENSMUSG00000015750	Aph1a	5209.97	2049.68	0.393415	3.72017e-25
ENSMUSG00000068874	Selenbp1	637.048	250.658	0.393467	3.11903e-08
ENSMUSG00000044442	N6amt1	1000.38	393.732	0.393584	8.44216e-14
ENSMUSG00000043668	Tox3	592.606	233.355	0.393777	1.33565e-12
ENSMUSG00000043940	Wdfy3	4469.99	1761.94	0.39417	4.12425e-12
ENSMUSG00000048696	Mex3d	577.883	227.856	0.394295	4.2358e-12
ENSMUSG00000036442	Thap11	1320.14	520.529	0.394298	9.5387e-17
ENSMUSG00000024431	Nr3c1	6102.27	2406.3	0.394329	8.3032e-26
ENSMUSG00000036782	Klhl13	1623.58	640.407	0.394441	2.31874e-11
ENSMUSG00000028223	Decr1	3199.28	1262.61	0.394654	4.20926e-22
ENSMUSG00000044068	Zrsr1	799.128	315.397	0.394676	3.84808e-13
ENSMUSG00000021709	Erbb2ip	34153.6	13481.1	0.394719	4.10251e-18
ENSMUSG00000025812	Pard3	5817.67	2300.28	0.395395	1.05041e-25
ENSMUSG00000037075	Rnf139	2497.5	987.547	0.395414	9.69215e-21
ENSMUSG00000019467	Arhgef25	985.016	389.51	0.395435	1.39722e-10
ENSMUSG00000031355	Arhgap6	481.279	190.33	0.395467	2.9731e-07
ENSMUSG00000036504	Phpt1	2881.84	1139.92	0.395554	2.97317e-22
ENSMUSG00000068748	Ptprz1	4223.75	1671.57	0.395756	8.84901e-25
ENSMUSG00000060814	Gm4980	161.956	64.0994	0.395783	1.70521e-05
ENSMUSG00000063849	Ppcdc	1135.21	449.321	0.395804	2.22678e-15
ENSMUSG00000054850	Ncrna00086	235.843	93.351	0.395819	1.47371e-06
ENSMUSG00000001794	Capns1	13234.9	5242.39	0.396104	4.02855e-25
ENSMUSG00000038485	Socs7	2928.42	1160.09	0.396148	9.33265e-23
ENSMUSG00000025139	Tollip	6366.5	2522.28	0.39618	1.82891e-25
ENSMUSG00000076435	Acsf2	1453.72	576.032	0.396248	2.49592e-16
ENSMUSG00000053916	Nanp	79.5662	31.5568	0.396611	0.00028899
ENSMUSG00000071553	Cpa2	211.586	83.9679	0.39685	9.41249e-07
ENSMUSG00000040097	Flywch1	3471.23	1377.83	0.396927	1.88785e-23
ENSMUSG00000043987	Cep164	4274.41	1697.02	0.397018	3.76179e-24
ENSMUSG00000032358	Fam83b	1376.42	546.621	0.397133	2.52002e-07
ENSMUSG00000015994	Fnta	4320.06	1717.28	0.397512	3.73004e-24
ENSMUSG00000055424	Gm9970	173.255	68.8721	0.397518	8.00728e-06
ENSMUSG00000029432	Gbas	5185.68	2062.12	0.397656	9.20232e-25
ENSMUSG00000029148	Nrbp1	6411.64	2551.09	0.397885	1.85517e-25
ENSMUSG00000044452	Zfp507	2343.45	932.693	0.398	1.35628e-20
ENSMUSG00000003233	Dvl3	2987.92	1189.59	0.398134	4.57668e-23
ENSMUSG00000034118	Tpst1	818.655	325.968	0.398175	1.3937e-11
ENSMUSG00000089876	Tmem102	1097.06	436.833	0.398185	2.28695e-14
ENSMUSG00000033400	Agl	4046.64	1612.05	0.398369	9.28795e-24
ENSMUSG00000031508	Ankrd10	2366.72	942.86	0.398383	2.81418e-10
ENSMUSG00000055137	5033411D12Rik	219.485	87.4579	0.398469	2.78053e-06
ENSMUSG00000051007	Pddc1	967.724	385.677	0.398541	9.45312e-12
ENSMUSG00000022508	Bcl6	1482.15	590.781	0.398597	1.26481e-09
ENSMUSG00000039952	Dag1	6954.62	2772.42	0.398644	1.97615e-25
ENSMUSG00000047412	Zbtb44	2778.3	1108.44	0.398963	1.19736e-21
ENSMUSG00000024253	Dync2li1	1845.72	736.384	0.398968	5.81078e-18
ENSMUSG00000044556	4930544O15Rik	46.105	18.399	0.399067	0.00202421
ENSMUSG00000026687	Aldh9a1	4668.22	1863.89	0.399272	6.50006e-24
ENSMUSG00000068270	Shroom4	588.978	235.179	0.399301	1.2223e-05
ENSMUSG00000021822	Plau	4320.76	1726.74	0.399637	1.80118e-23
ENSMUSG00000080316	Ncrna00085	214.804	85.8659	0.399741	0.0146679
ENSMUSG00000050357	Rltpr	1484.48	593.745	0.399967	3.98609e-08
ENSMUSG00000028114	Mettl14	2449.58	980.282	0.400184	1.9086e-20
ENSMUSG00000025571	Tnrc6c	6638.32	2658.92	0.400541	2.77688e-25
ENSMUSG00000030138	Bms1	6318.58	2532.32	0.400773	6.47254e-25
ENSMUSG00000075594	K230010J24Rik	277.445	111.245	0.400962	1.59324e-07
ENSMUSG00000027239	Mdk	8665.29	3475.06	0.401032	5.5454e-25
ENSMUSG00000021156	Zmynd11	10347	4150.17	0.401099	4.11909e-25
ENSMUSG00000025190	Got1	5362.44	2151.35	0.40119	5.24039e-24
ENSMUSG00000019261	Mtap1s	4357.83	1748.42	0.401214	5.01015e-16
ENSMUSG00000021417	Eci2	2742.9	1100.6	0.401252	3.68968e-21
ENSMUSG00000074228	Gm10645	124.349	49.9313	0.401543	1.32988e-05
ENSMUSG00000031642	Sh3rf1	2284.38	917.328	0.401565	1.10126e-19
ENSMUSG00000055320	Tead1	5938.24	2385.15	0.401659	5.89674e-25
ENSMUSG00000062980	A430107O13Rik	108.055	43.4197	0.401829	8.64792e-05
ENSMUSG00000021250	Fos	30103.7	12099.4	0.401925	0.0821147
ENSMUSG00000052387	Trpm3	930.684	374.084	0.401945	0.000261211
ENSMUSG00000058351	2010107H07Rik	246.138	98.9748	0.402111	1.41628e-06
ENSMUSG00000038679	Trps1	1386.62	557.755	0.402242	7.76215e-16
ENSMUSG00000024855	Pacs1	5215.63	2098.97	0.402439	1.14319e-24
ENSMUSG00000017561	Crlf3	2363.79	951.291	0.402443	1.06105e-19
ENSMUSG00000091742	Gm5093	82.6814	33.2835	0.402551	0.000599483
ENSMUSG00000070643	Sox13	365.341	147.094	0.40262	6.16203e-09
ENSMUSG00000030103	Bhlhe40	6805.83	2741.1	0.402757	0.0731978
ENSMUSG00000079002	C030006K11Rik	1001.19	403.4	0.402922	1.28456e-13
ENSMUSG00000007411	Mark3	5928.52	2390.31	0.403188	1.33581e-24
ENSMUSG00000060301	2610008E11Rik	1668.18	672.931	0.403392	1.00072e-17
ENSMUSG00000033781	Asb13	1567.35	632.658	0.403647	8.70844e-17
ENSMUSG00000026820	Ptges2	463.301	187.051	0.403736	4.47805e-09
ENSMUSG00000029191	Rfc1	3873.89	1564.45	0.403844	1.10907e-22
ENSMUSG00000039536	Stau1	5565.44	2249.15	0.404127	2.44297e-24
ENSMUSG00000029094	Afap1	2214.73	895.154	0.404182	3.36029e-08
ENSMUSG00000025041	Nt5c2	2315.17	935.877	0.404237	5.5218e-20
ENSMUSG00000037490	Slc2a12	304.919	123.282	0.404311	3.74241e-07
ENSMUSG00000038848	Ythdf1	4062.39	1642.57	0.404337	3.06772e-23
ENSMUSG00000031068	Glrx3	7478.67	3025.46	0.404544	1.01267e-24
ENSMUSG00000026604	Ptpn14	11205.3	4536.94	0.404894	1.00298e-13
ENSMUSG00000030486	Zfp108	87.4699	35.4295	0.405048	0.000162872
ENSMUSG00000053442	4930597O21Rik	59.24	23.9983	0.405102	0.0179274
ENSMUSG00000048040	Arxes2	356.131	144.271	0.405107	3.97177e-07
ENSMUSG00000069833	Ahnak	21269.2	8620.35	0.405297	5.42503e-06
ENSMUSG00000025086	Trub1	1404.87	569.52	0.40539	1.54699e-15
ENSMUSG00000048251	Bcl11b	1819.28	738.007	0.405659	1.13771e-06
ENSMUSG00000036941	Elac1	861.219	349.409	0.405715	1.8844e-12
ENSMUSG00000047909	Ankrd16	1217.2	493.968	0.405823	1.9726e-08
ENSMUSG00000003531	Dgcr6	1256.38	509.924	0.405869	1.11522e-15
ENSMUSG00000071252	2210408I21Rik	708.57	287.875	0.406276	1.09971e-10
ENSMUSG00000039357	Fut11	1170.48	475.603	0.40633	1.18626e-14
ENSMUSG00000018846	Pank3	7099.35	2885.24	0.406409	4.15335e-17
ENSMUSG00000021814	Anxa7	9468.31	3848.47	0.406458	1.43301e-24
ENSMUSG00000032570	Atp2c1	9695.37	3940.79	0.406461	1.51399e-24
ENSMUSG00000046805	Mpeg1	649.87	264.394	0.406841	2.96574e-05
ENSMUSG00000086784	Isoc2a	388.929	158.253	0.406893	4.11126e-08
ENSMUSG00000034194	R3hcc1	1440.65	586.208	0.406906	3.46327e-16
ENSMUSG00000029575	Mmab	1017.31	413.983	0.40694	4.15746e-13
ENSMUSG00000031143	Ccdc22	1710.81	696.537	0.407138	5.70398e-18
ENSMUSG00000050240	Hic2	396.66	161.522	0.407206	1.52038e-08
ENSMUSG00000029027	Dffb	357.141	145.441	0.407236	2.3297e-08
ENSMUSG00000063838	Cdc42ep5	348.136	141.791	0.407288	2.10217e-06
ENSMUSG00000035234	Fam175a	406.825	165.765	0.40746	6.1094e-08
ENSMUSG00000021098	4930447C04Rik	470.045	191.582	0.407582	0.00122844
ENSMUSG00000031755	Bbs2	2524.64	1029.37	0.407731	1.60041e-20
ENSMUSG00000068696	Gpr88	522.887	213.254	0.407839	1.8445e-08
ENSMUSG00000048445	Ccdc57	648.904	264.676	0.407881	1.34524e-10
ENSMUSG00000026211	Obsl1	4734.94	1931.3	0.407883	1.72953e-11
ENSMUSG00000021930	6330409N04Rik	5414.54	2208.53	0.407889	9.88748e-24
ENSMUSG00000020484	Xbp1	6489	2648.48	0.408149	3.73569e-24
ENSMUSG00000009566	Fpgs	937.356	382.598	0.408167	2.41672e-12
ENSMUSG00000030770	Parva	7146.03	2916.86	0.40818	2.34797e-24
ENSMUSG00000091648	C2cd4d	17.1895	7.01671	0.408197	0.030576
ENSMUSG00000022641	Bbx	3987.74	1628.14	0.408287	1.45166e-22
ENSMUSG00000009741	Ubp1	7975.98	3258.14	0.408494	1.96681e-24
ENSMUSG00000050052	2610019F03Rik	755.495	308.665	0.40856	2.73948e-11
ENSMUSG00000078954	Arhgap8	4420.81	1806.65	0.40867	4.26094e-23
ENSMUSG00000023039	Krt7	17594.5	7190.65	0.408688	2.75213e-21
ENSMUSG00000020251	Glt8d2	329.138	134.677	0.40918	1.53436e-06
ENSMUSG00000002057	Foxn1	16967.6	6943.13	0.409198	8.56762e-23
ENSMUSG00000027387	Zc3h8	355.219	145.355	0.409198	1.71053e-07
ENSMUSG00000078906	Gm14444	23.533	9.63114	0.409261	0.0185349
ENSMUSG00000007836	Hnrnpa0	11405.2	4668.64	0.409342	1.03513e-23
ENSMUSG00000026229	Psmd1	15051.7	6163.97	0.40952	2.52295e-23
ENSMUSG00000003847	Nfat5	13582.5	5565.49	0.409754	0.000189309
ENSMUSG00000044816	D630023F18Rik	389.058	159.425	0.409772	2.05395e-08
ENSMUSG00000021699	Pde4d	964.189	395.183	0.40986	4.34304e-08
ENSMUSG00000002803	Btbd6	578.795	237.292	0.409975	2.22444e-08
ENSMUSG00000020923	Ubtf	10208.8	4185.57	0.409995	7.67535e-24
ENSMUSG00000035967	Ddx26b	3503.48	1437.72	0.410369	8.49455e-08
ENSMUSG00000034639	Setmar	176.77	72.5489	0.410414	8.62605e-06
ENSMUSG00000021832	Psmc6	9978.3	4095.39	0.410429	3.49445e-24
ENSMUSG00000034235	Usp54	2232.71	916.477	0.410478	3.23914e-19
ENSMUSG00000048874	Phf3	6525.56	2680.11	0.41071	1.31644e-22
ENSMUSG00000074661	Pde4d	257.53	105.796	0.41081	3.63966e-07
ENSMUSG00000027566	Psma7	12688.9	5213.83	0.410897	1.25744e-23
ENSMUSG00000047379	B3gnt1	771.854	317.237	0.411006	1.41175e-11
ENSMUSG00000022439	Parvg	445.69	183.258	0.411178	0.00856981
ENSMUSG00000020422	Tns3	21088	8671.33	0.411198	1.94407e-20
ENSMUSG00000002660	Clpp	1870.83	769.365	0.411244	5.89216e-18
ENSMUSG00000014554	Dguok	1270.09	522.396	0.411305	7.55265e-15
ENSMUSG00000061601	Pclo	4619.35	1900.14	0.411345	5.54274e-17
ENSMUSG00000032239	Rp9	1767.21	727.225	0.411509	9.15654e-18
ENSMUSG00000042389	Tsen2	564.705	232.507	0.411731	2.56379e-09
ENSMUSG00000074273	Gm10657	38.2066	15.7356	0.411854	0.0109745
ENSMUSG00000046761	Fam83h	4234.39	1744.37	0.411953	7.86844e-23
ENSMUSG00000038954	Supt3h	810.725	334.056	0.412046	6.43737e-11
ENSMUSG00000019822	Smpd2	1404.2	578.857	0.412233	4.96658e-15
ENSMUSG00000028771	Ptpn12	1800.84	742.957	0.412561	1.81572e-18
ENSMUSG00000020423	Btg2	8826.56	3641.77	0.412592	9.05311e-05
ENSMUSG00000023027	Atf1	3145.11	1297.88	0.412665	8.49834e-21
ENSMUSG00000024965	Fermt3	547.904	226.148	0.412751	0.00141103
ENSMUSG00000021018	Polr2h	1340.96	553.515	0.412774	3.39943e-15
ENSMUSG00000049792	Bag5	1485.7	613.375	0.412851	7.36672e-16
ENSMUSG00000037151	Lrrc20	482.968	199.578	0.413233	2.16579e-08
ENSMUSG00000041845	Rhod	593.005	245.071	0.413269	6.24946e-10
ENSMUSG00000022895	Ets2	9970.24	4124.88	0.413719	1.88785e-23
ENSMUSG00000032050	Rdx	10835.4	4484.45	0.413871	1.37592e-23
ENSMUSG00000022449	Adamts20	389.787	161.323	0.413875	2.27052e-05
ENSMUSG00000015846	Rxra	5036.91	2085.07	0.413957	4.0828e-23
ENSMUSG00000031897	Psmb10	23392.6	9686.35	0.414077	6.66069e-17
ENSMUSG00000040860	Crocc	859.119	355.832	0.414182	1.13905e-12
ENSMUSG00000039232	Stx11	5766.42	2388.89	0.414275	4.16111e-23
ENSMUSG00000017499	Cdc6	596.606	247.192	0.41433	2.70602e-09
ENSMUSG00000019558	Slc6a8	8869.44	3675.13	0.414359	1.1459e-18
ENSMUSG00000048720	Tbc1d12	552.672	229.014	0.414375	2.27451e-09
ENSMUSG00000009828	Ick	1613.32	668.608	0.414429	3.0926e-16
ENSMUSG00000027533	Fabp5	143116	59323.5	0.414512	1.90904e-09
ENSMUSG00000012076	Brms1l	1449.31	601.129	0.41477	2.7804e-15
ENSMUSG00000051074	4930579K19Rik	33.6771	13.9722	0.414887	0.00859335
ENSMUSG00000035615	Frmpd1	760.112	315.412	0.414955	1.38405e-10
ENSMUSG00000078896	Gm8923	14.7979	6.14115	0.415002	0.0641509
ENSMUSG00000027351	Spred1	3156.19	1311.04	0.415385	2.4539e-20
ENSMUSG00000039137	Whrn	3796.75	1577.21	0.41541	1.5747e-14
ENSMUSG00000057230	Aak1	1274.63	529.658	0.415538	3.0607e-15
ENSMUSG00000037361	0610009D07Rik	4944.62	2055.67	0.415739	1.87437e-22
ENSMUSG00000048000	Gigyf2	5394.06	2245.44	0.416281	3.89341e-23
ENSMUSG00000021796	Bmpr1a	7223.82	3007.6	0.416345	8.19935e-19
ENSMUSG00000069855	Slc47a2	292.389	121.752	0.416403	2.88681e-06
ENSMUSG00000035239	Neu3	1192.11	496.772	0.416718	3.15889e-13
ENSMUSG00000037017	Zscan21	2374.21	989.852	0.416919	7.52214e-19
ENSMUSG00000039585	Myo9a	3528.9	1471.27	0.41692	9.35063e-17
ENSMUSG00000021413	Prpf4b	6798.99	2834.9	0.416959	4.9055e-11
ENSMUSG00000046841	Ckap4	3929.48	1638.68	0.417022	3.55716e-22
ENSMUSG00000028582	Cc2d1b	5222.87	2178.64	0.417135	8.81641e-23
ENSMUSG00000024376	Epb4.1l4a	1587.43	662.24	0.417177	3.57552e-16
ENSMUSG00000020884	Asgr1	174.017	72.6101	0.417259	7.04867e-05
ENSMUSG00000039063	Echdc3	313.185	130.706	0.417345	9.42095e-07
ENSMUSG00000031673	Cdh11	3267.98	1364.29	0.417471	9.15427e-21
ENSMUSG00000042500	Eif2c4	918.731	383.641	0.417577	2.72192e-09
ENSMUSG00000038866	Zcchc2	2904.92	1213.09	0.417598	1.4437e-09
ENSMUSG00000045817	Zfp36l2	4270.91	1785.03	0.417952	2.13792e-07
ENSMUSG00000019820	Utrn	8432.21	3524.46	0.417976	1.01158e-18
ENSMUSG00000060441	Trim5	456.942	191.006	0.41801	2.39206e-08
ENSMUSG00000000823	Znf512b	4212.21	1761.49	0.418186	3.09454e-14
ENSMUSG00000059495	Arhgef12	13500.9	5650.48	0.418525	2.60807e-22
ENSMUSG00000033610	Pank1	736.579	308.322	0.418587	1.79693e-10
ENSMUSG00000024424	Ttc39c	1678.67	702.73	0.418623	3.40836e-15
ENSMUSG00000026313	Hdac4	1890.05	791.465	0.418753	4.96625e-18
ENSMUSG00000015112	Slc25a13	9122.45	3821.22	0.418881	6.32881e-23
ENSMUSG00000020260	Pofut2	2039.81	854.606	0.418963	7.05395e-18
ENSMUSG00000087419	Gm16721	228.727	95.843	0.419027	1.57151e-06
ENSMUSG00000001983	Taco1	868.437	364.036	0.419186	7.66713e-12
ENSMUSG00000037784	Dzip1l	1323.21	554.923	0.419377	3.32534e-14
ENSMUSG00000058831	Opn1sw	31.2855	13.1211	0.4194	0.0117991
ENSMUSG00000031988	Vps26b	4844.73	2032.52	0.419532	4.09198e-22
ENSMUSG00000029787	Avl9	7368.2	3091.67	0.419597	4.45563e-23
ENSMUSG00000045896	Paip2b	2532.97	1063.29	0.419779	1.52055e-18
ENSMUSG00000044197	Gpr146	697.687	292.951	0.419889	3.05642e-11
ENSMUSG00000025035	Arl3	3299.43	1385.45	0.419905	1.48025e-20
ENSMUSG00000048856	Slc25a47	169.341	71.1315	0.420048	0.000289737
ENSMUSG00000020175	Rab36	601.287	252.58	0.420066	6.61907e-09
ENSMUSG00000022244	Amacr	749.163	314.855	0.420276	2.7821e-10
ENSMUSG00000004880	Lbr	2742.3	1152.57	0.420292	4.28197e-17
ENSMUSG00000063388	BC023105	777.302	326.727	0.420334	0.0426191
ENSMUSG00000055737	Ghr	1370.99	576.696	0.420641	1.70222e-14
ENSMUSG00000061979	Wbscr16	874.067	367.734	0.420716	8.02042e-12
ENSMUSG00000006395	Hyi	584.464	246.007	0.420911	1.20015e-09
ENSMUSG00000038286	Bphl	1791.53	754.156	0.420956	1.30837e-16
ENSMUSG00000009733	Tfcp2	1474.58	621.08	0.42119	2.81237e-15
ENSMUSG00000006134	Crkl	2683.59	1130.52	0.42127	1.89934e-19
ENSMUSG00000071103	1700029J07Rik	421.192	177.49	0.421401	1.15947e-05
ENSMUSG00000004263	Atn1	6376.41	2687.36	0.421454	9.77542e-23
[truncated: 8,658 more rows]

## Sheet: 2
Go back to DESeq comparisons
cTEC vs Aire_neg_TEC (>2 fold, 5% FDR, DESeq analysis)
Ensembl ID	Gene Symbol	cTEC (mean counts)	Aire_neg_TEC (mean counts)	Fold Change	FDR (BH)
ENSMUSG00000003657	Calb2	10.2953	0	0	7.63948e-05
ENSMUSG00000006764	Tph2	4.39993	0	0	0.023311
ENSMUSG00000007805	Twist2	470.562	0	0	2.94055e-35
ENSMUSG00000017316	Ppy	4.86962	0	0	0.0256782
ENSMUSG00000019933	2310015B20Rik	211.591	0	0	1.50442e-13
ENSMUSG00000022225	Cma1	3.90865	0	0	0.0407061
ENSMUSG00000022935	Grik1	6.81315	0	0	0.00980216
ENSMUSG00000023013	Aqp2	3.84388	0	0	0.0737453
ENSMUSG00000024678	Ms4a4d	5.72265	0	0	0.00592878
ENSMUSG00000025597	Klhl4	6.34346	0	0	0.00357826
ENSMUSG00000025902	Sox17	6.87791	0	0	0.00390768
ENSMUSG00000027568	Ntsr1	15.3323	0	0	7.86761e-06
ENSMUSG00000027596	a	13.0055	0	0	6.90088e-05
ENSMUSG00000027748	Trpc4	103.866	0	0	1.54924e-16
ENSMUSG00000028996	Rbp7	10.657	0	0	4.47617e-05
ENSMUSG00000029664	Tfpi2	3.39578	0	0	0.066037
ENSMUSG00000030092	Cntn6	19.1978	0	0	1.70237e-07
ENSMUSG00000030235	Slco1c1	3.86547	0	0	0.0592998
ENSMUSG00000030247	Kcnj8	14.2039	0	0	0.00665739
ENSMUSG00000030623	1700019G06Rik	32.6946	0	0	7.492e-11
ENSMUSG00000031397	Tktl1	3.28784	0	0	0.0660361
ENSMUSG00000032269	Htr3a	55.353	0	0	2.19175e-13
ENSMUSG00000033191	Tie1	44.3826	0	0	1.19237e-07
ENSMUSG00000033831	Fgb	3.93024	0	0	0.0393644
ENSMUSG00000034009	Rxfp1	6.66203	0	0	0.00315244
ENSMUSG00000034039	Prss29	5.87377	0	0	0.0067872
ENSMUSG00000034689	4921530L21Rik	15.7373	0	0	0.000890139
ENSMUSG00000035189	Ano4	11.4885	0	0	2.53037e-05
ENSMUSG00000037922	Bank1	4.84803	0	0	0.0155631
ENSMUSG00000038840	Birc7	9.56653	0	0	0.000133078
ENSMUSG00000039167	Eltd1	25.3091	0	0	0.002888
ENSMUSG00000039224	D1Pas1	5.70106	0	0	0.00792949
ENSMUSG00000039358	Drd5	6.23551	0	0	0.0136968
ENSMUSG00000041165	Spem1	6.14916	0	0	0.0777015
ENSMUSG00000046213	Cym	6.19234	0	0	0.00334335
ENSMUSG00000047686	Zcchc5	5.23137	0	0	0.0338132
ENSMUSG00000048087	Gm4737	2.86132	0	0	0.0988309
ENSMUSG00000049107	Ntf3	28.2731	0	0	2.62321e-08
ENSMUSG00000051297	2410124H12Rik	4.80485	0	0	0.0179124
ENSMUSG00000051455	Gm1564	6.2571	0	0	0.0039177
ENSMUSG00000051777	Iqcj	4.35675	0	0	0.0311629
ENSMUSG00000053747	Sox14	4.80485	0	0	0.0186114
ENSMUSG00000053773	Rdh8	5.76582	0	0	0.00690364
ENSMUSG00000054746	Abca15	24.4292	0	0	3.49062e-09
ENSMUSG00000055446	A630091E08Rik	3.37419	0	0	0.0704395
ENSMUSG00000055489	Ano5	34.487	0	0	6.30181e-13
ENSMUSG00000056399	Prss34	7.8173	0	0	0.00116421
ENSMUSG00000056821	1700028I16Rik	3.37419	0	0	0.0690998
ENSMUSG00000059244	Gm10062	5.72265	0	0	0.0160914
ENSMUSG00000061068	Mcpt4	3.43896	0	0	0.0665929
ENSMUSG00000061980	Dcpp1	3.39578	0	0	0.0647015
ENSMUSG00000062329	Cytl1	5.809	0	0	0.00835273
ENSMUSG00000063600	Egfem1	20.2236	0	0	3.24972e-08
ENSMUSG00000067220	Cnga1	12.6437	0	0	8.71703e-05
ENSMUSG00000067996	Bpifb9b	3.37419	0	0	0.0759875
ENSMUSG00000070388	Fbxo39	14.3282	0	0	3.142e-05
ENSMUSG00000073174	Magi2	18.1721	0	0	6.7394e-07
ENSMUSG00000073209	Klf14	104.103	0	0	8.46441e-26
ENSMUSG00000073785	Krtap5-5	7.70935	0	0	0.00155621
ENSMUSG00000075591	Gm10874	3.88706	0	0	0.0452243
ENSMUSG00000075707	Dio3	7.23966	0	0	0.00130553
ENSMUSG00000078129	1700007I08Rik	44.6959	0	0	6.09805e-13
ENSMUSG00000078169	Gm16499	15.91	0	0	3.22177e-06
ENSMUSG00000078640	Gm11627	25.3902	0	0	3.0274e-09
ENSMUSG00000078752	Gm12776	4.33516	0	0	0.0244821
ENSMUSG00000079042	Trim61	14.4146	0	0	8.50598e-06
ENSMUSG00000079652	Fam71f2	8.22222	0	0	0.00088465
ENSMUSG00000080907	4930455H04Rik	9.56653	0	0	0.000338304
ENSMUSG00000084927	Gm5724	10.101	0	0	0.000199062
ENSMUSG00000089634	Nat8b	3.37419	0	0	0.0614509
ENSMUSG00000090747	Gm17495	24.8773	0	0	6.06521e-08
ENSMUSG00000090843	Gm17673	27.2905	0	0	3.52067e-09
ENSMUSG00000090897	Gm5494	8.11428	0	0	0.00202278
ENSMUSG00000091222	Gm17723	28.9155	0	0	1.49624e-08
ENSMUSG00000093430	Isl2	25.9678	0	0	1.01635e-08
ENSMUSG00000061353	Cxcl12	43194.6	69.4529	0.00160791	0
ENSMUSG00000066797	Zfp648	529.808	1.11773	0.00210969	1.10168e-63
ENSMUSG00000024593	Megf10	1242.7	3.08144	0.00247964	2.12631e-62
ENSMUSG00000049409	Prokr1	279.939	0.702424	0.0025092	6.21791e-44
ENSMUSG00000064329	Scn1a	963.309	2.93788	0.00304978	9.39563e-23
ENSMUSG00000045318	Adra2c	542.716	1.82015	0.00335378	4.34399e-65
ENSMUSG00000072423	Psmb11	45444.8	162.486	0.00357545	9.07186e-51
ENSMUSG00000063605	Ccdc102a	910.044	3.51212	0.00385929	1.17596e-87
ENSMUSG00000062563	Cys1	469.035	1.82015	0.00388064	2.52874e-56
ENSMUSG00000039405	Prss23	141.5	0.558864	0.00394957	3.40497e-26
ENSMUSG00000026574	Dpt	1150.9	5.04515	0.00438365	1.15241e-94
ENSMUSG00000054061	Gm9934	248.47	1.11773	0.00449844	7.01609e-18
ENSMUSG00000026188	Tmem169	3703.62	18.6322	0.00503081	2.06078e-192
ENSMUSG00000012017	Scarf2	8968.11	47.2265	0.00526605	1.73585e-75
ENSMUSG00000017767	1700020C07Rik	741.206	4.19917	0.00566532	1.35882e-21
ENSMUSG00000006179	Prss16	302291	1713.78	0.00566929	1.28407e-62
ENSMUSG00000020793	Galr2	1902.13	12.1822	0.00640452	2.60531e-122
ENSMUSG00000031740	Mmp2	11147.2	83.5014	0.00749083	0
ENSMUSG00000031872	Bean1	143.568	1.11773	0.00778537	2.00401e-28
ENSMUSG00000004473	Clec11a	2088.71	17.0992	0.00818647	8.12376e-111
ENSMUSG00000020932	Gfap	424.177	3.49675	0.00824361	1.92078e-64
ENSMUSG00000022122	Ednrb	3697.72	31.3887	0.00848865	8.65083e-151
ENSMUSG00000018217	Pmp22	1497.36	13.1564	0.00878638	2.90175e-110
ENSMUSG00000028523	Tctex1d1	62.7816	0.558864	0.00890172	5.82538e-16
ENSMUSG00000074743	Thbd	2026.69	18.6322	0.00919343	1.96803e-126
ENSMUSG00000034990	Otoa	468.711	4.34273	0.00926526	4.33745e-73
ENSMUSG00000037624	Kcnk2	6538.49	61.6288	0.00942554	3.13533e-247
ENSMUSG00000021477	Ctsl	382821	3666.62	0.00957788	9.41716e-159
ENSMUSG00000022415	Syngr1	12414.9	118.93	0.00957967	0
ENSMUSG00000051226	Gm9851	7436	71.8627	0.00966416	1.29651e-262
ENSMUSG00000056174	Col8a2	1888.96	19.1911	0.0101596	2.2699e-118
ENSMUSG00000030562	Nox4	164.467	1.67659	0.0101941	4.03543e-16
ENSMUSG00000048285	Frmd6	51097.6	526.809	0.0103098	1.20187e-65
ENSMUSG00000003477	Inmt	1540.61	16.125	0.0104666	2.18526e-31
ENSMUSG00000050520	Cldn8	1330.8	14.1459	0.0106296	3.49631e-95
ENSMUSG00000006567	Atp7b	4005.82	42.8684	0.0107015	2.79562e-190
ENSMUSG00000046275	Tusc5	1218.92	13.2999	0.0109112	1.19774e-90
ENSMUSG00000057880	Abat	14399.1	164.034	0.0113919	0
ENSMUSG00000043461	1110032A04Rik	1280.46	14.7048	0.011484	4.77759e-72
ENSMUSG00000032649	Glt25d2	660.284	7.69592	0.0116555	2.01867e-34
ENSMUSG00000047746	Fbxo40	434.758	5.3169	0.0122296	7.46839e-50
ENSMUSG00000047692	4930533K18Rik	178.033	2.23546	0.0125564	6.82457e-30
ENSMUSG00000022206	Npr3	355.705	4.47092	0.0125692	3.57734e-45
ENSMUSG00000030087	Klf15	2746.95	35.1725	0.0128042	4.95317e-43
ENSMUSG00000027386	Fbln7	631.017	8.25478	0.0130817	2.20753e-61
ENSMUSG00000039873	Neurl2	3871.58	51.1693	0.0132166	3.71405e-175
ENSMUSG00000021760	Gpx8	1234.44	16.6685	0.0135029	2.08189e-95
ENSMUSG00000020695	Mrc2	778.483	11.0645	0.0142129	2.25609e-42
ENSMUSG00000052105	1110012J17Rik	4227.61	60.224	0.0142454	2.65813e-186
ENSMUSG00000053897	Slc39a8	2861.99	41.0175	0.0143318	5.8428e-158
ENSMUSG00000018593	Sparc	8869.58	133.107	0.0150071	1.08175e-115
ENSMUSG00000037379	Spon2	4364.41	66.4176	0.015218	8.10462e-51
ENSMUSG00000043496	Tril	717.191	10.9363	0.0152488	9.77445e-40
ENSMUSG00000022454	Nell2	3000.61	45.9806	0.0153238	1.61197e-159
ENSMUSG00000049929	Lpar4	72.1107	1.11773	0.0155002	7.47275e-07
ENSMUSG00000053399	Adamts18	1591.51	24.8258	0.0155989	2.29756e-46
ENSMUSG00000041797	Abca9	70.858	1.11773	0.0157742	3.28285e-15
ENSMUSG00000028373	Astn2	1791.7	28.8661	0.016111	2.12326e-22
ENSMUSG00000054134	Umodl1	1723.27	29.1071	0.0168906	4.83875e-114
ENSMUSG00000032766	Gng11	173.299	2.93788	0.0169527	1.40587e-30
ENSMUSG00000038540	Tmc3	2692.6	45.6781	0.0169643	8.11914e-57
ENSMUSG00000048794	Ccdc37	244.508	4.19917	0.017174	1.78337e-27
ENSMUSG00000044921	Rassf9	697.244	12.0386	0.017266	4.47382e-52
ENSMUSG00000051048	P4ha3	7241.41	125.298	0.017303	8.66714e-179
ENSMUSG00000028167	Bdh2	129.072	2.23546	0.0173194	1.51446e-27
ENSMUSG00000031772	Cntnap4	766.925	13.3307	0.017382	6.85861e-66
ENSMUSG00000017314	Mpp2	1481.06	25.9128	0.0174962	9.46119e-102
ENSMUSG00000030352	Tspan9	7753.39	138.983	0.0179254	1.65307e-241
ENSMUSG00000079355	Ccrl1	8875.67	160.825	0.0181197	1.14526e-49
ENSMUSG00000022057	Adamdec1	574.288	10.521	0.0183201	3.3309e-73
ENSMUSG00000041633	Kctd12b	908.199	17.2274	0.0189687	1.54824e-54
ENSMUSG00000044349	Snhg11	16386.9	311.656	0.0190186	6.51717e-42
ENSMUSG00000054034	Tceal5	58.684	1.11773	0.0190466	2.82109e-14
ENSMUSG00000030701	Plekhb1	6251.09	120.176	0.0192248	1.21711e-47
ENSMUSG00000027489	Necab3	640.093	12.3258	0.0192562	3.93582e-56
ENSMUSG00000020811	Wscd1	7393.61	143.756	0.0194433	4.76416e-35
ENSMUSG00000024211	Grm8	656.575	13.0436	0.0198661	2.13059e-59
ENSMUSG00000050623	1700019N12Rik	478.321	9.53144	0.0199269	7.65517e-49
ENSMUSG00000028020	Glrb	1472.67	29.8249	0.0202522	1.51834e-76
ENSMUSG00000028024	Enpep	8129.36	165.536	0.0203628	5.76881e-242
ENSMUSG00000050967	Creg2	832.087	17.0838	0.0205313	2.60269e-64
ENSMUSG00000048355	Arxes1	157.065	3.225	0.0205329	2.55104e-28
ENSMUSG00000020990	Cdkl1	27.0799	0.558864	0.0206376	1.10183e-06
ENSMUSG00000029844	Hoxa1	180.252	3.78387	0.0209921	2.79646e-28
ENSMUSG00000033590	Myo5c	2097.87	44.8014	0.0213557	2.71401e-127
ENSMUSG00000022441	Efcab6	32.7378	0.702424	0.0214561	2.0362e-10
ENSMUSG00000039982	Dtx4	5514.71	118.674	0.0215195	6.51579e-205
ENSMUSG00000042351	Grap2	3912.81	85.178	0.021769	6.36744e-157
ENSMUSG00000022342	Kcnv1	83.2806	1.82015	0.0218557	1.14804e-11
ENSMUSG00000020473	Aebp1	4086.49	89.8386	0.0219843	3.23866e-111
ENSMUSG00000014361	Mertk	215.079	4.90159	0.0227897	1.71153e-27
ENSMUSG00000004631	Sgce	776.464	17.9452	0.0231114	2.16853e-64
ENSMUSG00000052273	Dnahc3	211.046	4.90159	0.0232252	3.57823e-32
ENSMUSG00000024027	Glp1r	78.2219	1.82015	0.0232691	4.08842e-18
ENSMUSG00000014329	Bicc1	2187.54	51.8103	0.0236842	1.011e-114
ENSMUSG00000053647	Gpr30	1662.43	39.5153	0.0237696	3.01342e-57
ENSMUSG00000051041	Olfml1	2652.4	63.7669	0.0240412	3.52318e-76
ENSMUSG00000042807	Hecw2	585.415	14.1459	0.0241639	5.17987e-62
ENSMUSG00000027173	Depdc7	617.98	15.1201	0.024467	3.17236e-56
ENSMUSG00000023411	Nfatc4	205.415	5.04515	0.0245607	1.52483e-30
ENSMUSG00000020646	Mboat2	1081.29	26.7434	0.0247329	1.2769e-76
ENSMUSG00000026692	Fmo4	106.916	2.66614	0.0249367	1.77304e-06
ENSMUSG00000042417	Ccno	777.999	19.4782	0.0250363	1.51246e-13
ENSMUSG00000030510	Lass3	2378.87	60.4957	0.0254305	3.919e-72
ENSMUSG00000037653	Kctd8	92.6365	2.37902	0.0256812	5.56435e-19
ENSMUSG00000078235	Fam43b	168.942	4.34273	0.0257055	1.3402e-26
ENSMUSG00000005357	Slc1a6	21.5247	0.558864	0.0259639	0.000427583
ENSMUSG00000063415	Cyp26b1	1411.88	36.9927	0.026201	9.37947e-97
ENSMUSG00000021390	Ogn	240.07	6.45	0.0268672	8.01833e-36
ENSMUSG00000073988	Ttpa	166.923	4.48629	0.0268764	2.88658e-16
ENSMUSG00000043259	Fam13c	562.13	15.2636	0.0271532	1.65025e-24
ENSMUSG00000031563	Wwc2	2716.89	74.9595	0.0275902	1.07998e-136
ENSMUSG00000069171	Nr2f1	1215.24	33.6395	0.0276813	8.59354e-76
ENSMUSG00000027524	Edn3	50.2674	1.40485	0.0279475	3.55513e-08
ENSMUSG00000000942	Hoxa4	103.591	2.93788	0.0283605	8.98872e-20
ENSMUSG00000001555	Fkbp10	2230.75	63.4644	0.0284498	2.98393e-104
ENSMUSG00000038576	Susd4	3051.78	87.2699	0.0285964	2.45317e-137
ENSMUSG00000032440	Tgfbr2	8676.48	248.684	0.0286619	2.05534e-216
ENSMUSG00000067276	Capn6	223.523	6.45	0.0288561	4.87004e-40
ENSMUSG00000021448	Shc3	445.863	12.8846	0.0288982	5.33264e-44
ENSMUSG00000026748	Plxdc2	6957.77	202.129	0.0290509	1.0635e-208
ENSMUSG00000031595	Pdgfrl	66.6039	1.96371	0.0294834	5.80015e-17
ENSMUSG00000049115	Agtr1a	79.6742	2.37902	0.0298593	7.2325e-17
ENSMUSG00000031099	Smarca1	897.401	27.0152	0.0301038	2.20603e-75
ENSMUSG00000017754	Pltp	76860.2	2325.69	0.0302587	3.46882e-93
ENSMUSG00000034732	Pabpc5	82.962	2.52258	0.0304064	3.91184e-16
ENSMUSG00000056468	5730596B20Rik	151.229	4.62985	0.0306149	1.07119e-06
ENSMUSG00000021483	Cdk20	4926.51	150.924	0.0306351	6.61707e-44
ENSMUSG00000025038	Efhc2	266.291	8.39834	0.0315381	4.98034e-33
ENSMUSG00000022416	Cacna1i	423.777	13.4435	0.031723	2.27969e-36
ENSMUSG00000057967	Fgf18	22.0591	0.702424	0.0318428	1.77303e-07
ENSMUSG00000027488	Snta1	799.786	25.4821	0.0318612	9.73159e-59
ENSMUSG00000030088	Aldh1l1	12781.4	408.006	0.0319218	1.14787e-86
ENSMUSG00000016494	Cd34	1391.77	44.6886	0.0321091	7.53548e-102
ENSMUSG00000024909	Efemp2	1983.83	64.3103	0.0324173	5.02191e-25
ENSMUSG00000058145	Adamts17	1659.18	53.9483	0.0325151	2.45874e-20
ENSMUSG00000058914	C1qtnf3	54.6242	1.82015	0.0333214	5.23093e-14
ENSMUSG00000039252	Lgi2	8349.44	279.924	0.0335261	8.87001e-198
ENSMUSG00000045573	Penk	4289.61	146.202	0.0340828	3.0239e-151
ENSMUSG00000020774	Aspa	61.4589	2.10727	0.0342875	4.85281e-14
ENSMUSG00000022054	Nefm	6059.96	208.897	0.0344717	8.01129e-136
ENSMUSG00000020884	Asgr1	174.017	6.16288	0.0354155	4.03325e-26
ENSMUSG00000037034	Pax1	43654	1558.18	0.0356938	2.53537e-224
ENSMUSG00000000290	Itgb2	2038.74	72.8215	0.0357188	2.16263e-100
ENSMUSG00000062960	Kdr	66.1664	2.37902	0.0359551	7.77911e-05
ENSMUSG00000052331	Ankrd44	5859.25	212.86	0.0363289	6.90668e-175
ENSMUSG00000031937	2200002K05Rik	284.831	10.3621	0.0363797	9.82479e-34
ENSMUSG00000030554	Synm	19261.9	700.789	0.0363822	4.50716e-229
ENSMUSG00000043385	Olfr267	15.3323	0.558864	0.03645	5.09915e-05
ENSMUSG00000025105	Bnc1	3175.8	115.798	0.0364625	1.13005e-128
ENSMUSG00000024299	Adamts10	3549.4	130.313	0.036714	1.43123e-131
ENSMUSG00000033377	Palmd	352.487	13.0128	0.0369171	1.7896e-32
ENSMUSG00000045281	Gpr20	254.339	9.40326	0.0369714	8.91169e-35
ENSMUSG00000000753	Serpinf1	4614.45	171.141	0.037088	4.85833e-107
ENSMUSG00000056900	Usp13	356.477	13.2999	0.0373094	5.56025e-39
ENSMUSG00000001281	Itgb7	1906.84	71.1756	0.0373265	8.52058e-89
ENSMUSG00000059146	Ntrk3	107.99	4.05561	0.0375553	0.00613907
ENSMUSG00000038738	Shank1	1603.12	60.2547	0.037586	5.11273e-31
ENSMUSG00000046402	Rbp1	4035.57	153.052	0.0379257	1.12072e-66
ENSMUSG00000042943	4922501L14Rik	681.431	25.9128	0.0380271	1.53406e-51
ENSMUSG00000020261	Slc36a1	27885	1066.78	0.0382566	3.11714e-225
ENSMUSG00000026090	2010300C02Rik	6830.42	261.63	0.0383037	1.29725e-184
ENSMUSG00000035357	Pdzrn3	1626.56	62.3466	0.0383304	7.30328e-47
ENSMUSG00000020427	Igfbp3	2449.87	94.5659	0.0386003	6.15746e-116
ENSMUSG00000040867	Begain	473.516	18.3758	0.0388072	2.93836e-44
ENSMUSG00000043099	Hic1	6161.67	241.557	0.0392032	6.60776e-18
ENSMUSG00000060487	Samd5	778.052	30.6709	0.0394201	3.10467e-57
ENSMUSG00000078161	BC007180	2276.82	89.8386	0.039458	4.3975e-67
ENSMUSG00000030737	Slco2b1	4588.03	185.379	0.0404048	8.47812e-152
ENSMUSG00000044338	Aplnr	48.3344	1.96371	0.0406276	0.000236305
ENSMUSG00000015653	Steap2	443.726	18.0733	0.0407309	2.11927e-45
ENSMUSG00000040649	Rimklb	2062.37	84.332	0.0408909	2.22486e-14
ENSMUSG00000032714	Syde1	712.376	29.4249	0.0413053	1.67444e-54
ENSMUSG00000016386	Mpped2	1368.49	56.758	0.0414748	1.04216e-81
ENSMUSG00000026686	Lmx1a	77.558	3.225	0.0415818	1.90883e-17
ENSMUSG00000029769	Ccdc136	2617.48	109.732	0.0419228	2.18139e-105
ENSMUSG00000069855	Slc47a2	292.389	12.3258	0.0421554	1.68912e-35
ENSMUSG00000046169	Adamts6	643.144	27.1587	0.0422281	2.91763e-11
ENSMUSG00000062488	I830012O16Rik	534.737	22.6724	0.0423992	9.69848e-20
ENSMUSG00000037014	Sstr4	29.4931	1.26129	0.0427655	2.4556e-05
ENSMUSG00000042428	Mgat3	12161.8	522.133	0.0429322	3.86975e-72
ENSMUSG00000046733	Gprc5a	1063.52	46.1242	0.0433692	3.94074e-66
ENSMUSG00000020686	Gas2l2	41.921	1.82015	0.0434187	2.5105e-11
ENSMUSG00000040289	Hey1	7717.06	336.846	0.0436496	3.30788e-180
ENSMUSG00000034685	Fam171a2	551.845	24.108	0.0436863	3.54628e-19
ENSMUSG00000025129	Ppp1r27	2675.49	117.269	0.0438308	1.63617e-105
ENSMUSG00000005397	Nid1	2067.2	90.6077	0.0438312	9.80165e-91
ENSMUSG00000020251	Glt8d2	329.138	14.433	0.043851	1.00361e-36
ENSMUSG00000064080	Fbln2	383.421	16.971	0.044262	9.70132e-54
ENSMUSG00000060988	Galnt13	258.431	11.4798	0.0444211	1.211e-30
ENSMUSG00000041734	Kirrel	3904.96	173.514	0.0444343	8.6868e-23
ENSMUSG00000028669	1110049F12Rik	23634.7	1054.13	0.0446008	1.42225e-45
ENSMUSG00000036036	Zfp57	894.221	40.0587	0.0447974	1.12667e-56
ENSMUSG00000000305	Cdh4	26690.1	1197.96	0.0448841	8.29927e-211
ENSMUSG00000027574	Nkain4	2034.34	91.3716	0.0449146	1.03563e-90
ENSMUSG00000040569	Slc26a7	400.757	18.058	0.0450596	8.21033e-42
ENSMUSG00000059213	Ddn	52.2542	2.37902	0.0455278	7.68197e-13
ENSMUSG00000074060	Fbxw15	15.3539	0.702424	0.0457488	8.65929e-05
ENSMUSG00000053044	Cd8b1	1243.26	56.9682	0.0458216	4.21504e-07
ENSMUSG00000020424	Gatsl3	9215.68	422.783	0.0458765	8.85675e-106
ENSMUSG00000027435	Cd93	133.396	6.16288	0.0461998	0.000335444
ENSMUSG00000079560	Hoxa3	1316.63	60.9725	0.0463096	1.19266e-70
ENSMUSG00000032372	Plscr2	609.995	28.2918	0.0463804	8.70221e-45
ENSMUSG00000078922	Tgtp1	757.381	35.5571	0.0469474	3.38409e-13
ENSMUSG00000040562	Gstm2	1618.54	76.0465	0.0469847	1.84732e-97
ENSMUSG00000068874	Selenbp1	637.048	29.9684	0.0470426	5.90112e-47
ENSMUSG00000021068	Nin	17887.1	846.125	0.0473037	4.92368e-135
ENSMUSG00000061311	Rag1	7921.98	377.72	0.04768	4.70764e-15
ENSMUSG00000090084	Srpx	52.6591	2.52258	0.0479039	9.87194e-13
ENSMUSG00000051359	Ncald	280.658	13.5871	0.0484115	3.99154e-35
ENSMUSG00000027460	Angpt4	118.48	5.74758	0.048511	1.02065e-19
ENSMUSG00000047330	Kcne4	132.63	6.43463	0.0485155	1.07242e-13
ENSMUSG00000039959	Hip1	1082.6	52.5281	0.0485201	3.82893e-28
ENSMUSG00000034522	Zfp395	5363.9	262.015	0.0488478	7.15545e-150
ENSMUSG00000056031	9330154J02Rik	65.1949	3.225	0.0494671	4.30683e-13
ENSMUSG00000022793	B4galt4	733.82	36.5774	0.0498452	1.65623e-56
ENSMUSG00000031323	Dmrtc1a	75.3606	3.78387	0.0502101	7.75445e-16
ENSMUSG00000047821	Trim16	762.271	38.3821	0.0503524	1.15331e-52
ENSMUSG00000074505	Fat3	2641.94	133.779	0.0506366	5.59765e-15
ENSMUSG00000028037	Ifi44	4344.64	220.633	0.0507828	3.65513e-20
ENSMUSG00000085584	Rgag1	10.9756	0.558864	0.0509188	0.000436148
ENSMUSG00000074896	Ifit3	1663.01	84.7627	0.0509693	2.22079e-16
ENSMUSG00000022665	Ccdc80	6515.66	333.221	0.0511416	1.51805e-66
ENSMUSG00000033720	Sfxn5	1790.06	91.7408	0.0512502	2.72416e-81
ENSMUSG00000052713	Zfp608	3834.08	196.505	0.0512522	1.56669e-17
ENSMUSG00000028179	Cth	4660.79	239.435	0.0513721	4.56241e-138
ENSMUSG00000074415	2610203C20Rik	1366.14	70.1861	0.0513756	0.005146
ENSMUSG00000044807	Zfp354c	1911.17	98.7804	0.0516858	7.17372e-84
ENSMUSG00000026580	Selp	27.0962	1.40485	0.0518467	4.11094e-09
ENSMUSG00000062760	1810041L15Rik	10935.3	567.283	0.0518762	7.46562e-179
ENSMUSG00000028487	Bnc2	523.61	27.1741	0.0518976	1.50703e-41
ENSMUSG00000024085	Man2a1	37669.9	1972.91	0.0523736	7.65447e-88
ENSMUSG00000014704	Hoxa2	778.203	40.8073	0.0524379	3.16195e-52
ENSMUSG00000027955	Fam198b	688.622	36.1313	0.052469	1.22405e-47
ENSMUSG00000027227	Sord	6712.03	352.51	0.0525191	4.84626e-159
ENSMUSG00000042379	Esm1	10.6139	0.558864	0.0526542	0.000781041
ENSMUSG00000021259	Cyp46a1	13.3025	0.702424	0.0528041	4.95979e-05
ENSMUSG00000047067	Dusp28	2421.5	128.062	0.0528854	2.41138e-20
ENSMUSG00000027016	Zfp385b	1071.94	56.7426	0.0529344	2.40727e-57
ENSMUSG00000040473	A330021E22Rik	128.873	6.86531	0.053272	2.40092e-16
ENSMUSG00000048703	Speer4b	10.4843	0.558864	0.0533048	0.000719718
ENSMUSG00000045636	Mtus1	2861.03	153.641	0.0537014	6.3542e-112
ENSMUSG00000022178	Jub	6379.07	345.578	0.0541737	2.55136e-84
ENSMUSG00000041624	Gucy1a2	2635.49	144.715	0.0549101	2.26536e-25
ENSMUSG00000014725	Adam28	1853.4	102.036	0.0550535	9.58562e-16
ENSMUSG00000036256	Igfbp7	843.97	46.924	0.0555992	1.49954e-51
ENSMUSG00000028801	4930555I21Rik	563.393	31.5168	0.0559411	2.01386e-28
ENSMUSG00000038152	5033430I15Rik	179.766	10.0903	0.0561302	1.41722e-23
ENSMUSG00000024957	Kcnk4	196.513	11.0645	0.0563041	3.39263e-12
ENSMUSG00000039057	Myo16	2776.37	156.595	0.0564027	5.49865e-101
ENSMUSG00000030513	Pcsk6	2440.72	137.752	0.0564392	1.03995e-95
ENSMUSG00000025911	Adhfe1	1629.73	92.0587	0.056487	2.07437e-49
ENSMUSG00000026581	Sell	163.03	9.24432	0.0567032	3.84296e-11
ENSMUSG00000008575	Nfib	16038.5	909.446	0.0567039	1.50563e-84
ENSMUSG00000047712	Ust	2926.67	166.27	0.0568118	4.52845e-101
ENSMUSG00000048572	E030010A14Rik	1429.15	81.2813	0.0568738	7.17448e-48
ENSMUSG00000075324	Fign	257.092	14.7202	0.0572564	1.0225e-26
ENSMUSG00000062257	Opcml	1659.7	95.1248	0.0573145	4.16649e-81
ENSMUSG00000005696	Sh2d1a	260.774	14.9765	0.0574311	9.01145e-07
ENSMUSG00000024578	Il17b	63.1918	3.64031	0.0576072	2.68819e-12
ENSMUSG00000044835	Ankrd45	24.3428	1.40485	0.057711	1.8397e-07
ENSMUSG00000034212	Ankmy1	531.903	30.7837	0.0578746	8.6052e-42
ENSMUSG00000030775	Trat1	378.266	21.97	0.0580809	1.2115e-35
ENSMUSG00000056494	Cngb3	60.1362	3.49675	0.0581471	1.17719e-12
ENSMUSG00000042109	Csdc2	662.006	38.5103	0.0581722	4.88919e-48
ENSMUSG00000021198	Unc79	4888.54	286.266	0.0585587	1.54475e-108
ENSMUSG00000033192	Lpcat2	3977.36	233.851	0.0587955	2.27341e-39
ENSMUSG00000021763	BC067074	2981.3	176.406	0.0591709	2.90279e-44
ENSMUSG00000038578	Susd1	348.001	20.7395	0.0595961	2.70742e-33
ENSMUSG00000039236	Isg20	15459.7	924.791	0.0598194	2.05631e-126
ENSMUSG00000033581	Igf2bp2	1759.25	105.328	0.0598708	6.47124e-80
ENSMUSG00000022591	Gm9747	954.206	57.1887	0.0599332	2.5147e-59
ENSMUSG00000023092	Fhl1	1509.32	90.8948	0.0602222	5.66135e-80
ENSMUSG00000056481	Cd248	11.6612	0.702424	0.0602361	0.00116599
ENSMUSG00000059049	Frem1	334.472	20.1652	0.0602898	3.17912e-30
ENSMUSG00000070858	Gm1673	546.5	33.0652	0.0605037	1.72494e-05
ENSMUSG00000020641	Rsad2	1868.17	113.454	0.0607302	1.44014e-16
ENSMUSG00000055538	Zcchc24	1039.1	63.3054	0.0609236	5.77702e-21
ENSMUSG00000024640	Psat1	20792.3	1269.51	0.0610566	1.37895e-178
ENSMUSG00000079451	Tmprss11g	77.7738	4.75803	0.0611778	3.88104e-14
ENSMUSG00000040209	Zfp704	4623.49	282.867	0.0611804	2.38801e-66
ENSMUSG00000049109	Themis	1127.07	69.0223	0.0612406	1.31301e-16
ENSMUSG00000007480	Mc5r	73.1633	4.48629	0.0613189	1.37339e-12
ENSMUSG00000053977	Cd8a	2469.92	151.806	0.0614618	8.43265e-09
ENSMUSG00000090206	Tepp	957.051	58.9781	0.0616248	7.55524e-51
ENSMUSG00000053441	Adamts19	836.164	51.6975	0.0618269	3.68127e-12
ENSMUSG00000042684	Npl	3335.43	206.713	0.0619749	6.50303e-124
ENSMUSG00000045934	Mtmr11	3171.2	196.971	0.0621126	4.0992e-51
ENSMUSG00000042514	Klhl14	56.2655	3.49675	0.0621473	1.09878e-09
ENSMUSG00000029669	Tspan12	1229.97	76.4464	0.0621532	2.4091e-68
ENSMUSG00000047986	Palm3	1283.59	80.4353	0.0626645	4.67147e-59
ENSMUSG00000028524	Sgip1	202.544	12.7257	0.0628294	3.70105e-14
ENSMUSG00000046908	Ltb4r1	338.315	21.283	0.0629087	1.04349e-09
ENSMUSG00000028128	F3	484.606	30.5427	0.0630258	3.05902e-11
ENSMUSG00000043102	Qrfp	141.797	8.97258	0.0632776	1.7662e-20
ENSMUSG00000009248	Ascl2	224.554	14.2895	0.063635	1.65665e-27
ENSMUSG00000078144	Capns2	293.258	18.7604	0.0639723	1.98438e-11
ENSMUSG00000031274	Col4a5	3931.22	252.007	0.0641039	2.82451e-118
ENSMUSG00000057614	Gnai1	1379.2	88.5619	0.0642126	2.11775e-66
ENSMUSG00000028139	Riiad1	646.825	41.5764	0.0642776	2.95506e-37
ENSMUSG00000029026	Trp73	276.916	17.8016	0.0642852	1.02188e-23
ENSMUSG00000024143	Rhoq	4625.2	298.131	0.064458	9.81478e-127
ENSMUSG00000050179	A930002I21Rik	17.3191	1.11773	0.0645375	5.14902e-05
ENSMUSG00000025272	Tro	280.965	18.2015	0.0647822	4.37572e-32
ENSMUSG00000049112	Oxtr	30.0871	1.96371	0.0652677	0.000253254
ENSMUSG00000020335	Zfp354b	59.9635	3.92743	0.0654969	4.50829e-12
ENSMUSG00000030849	Fgfr2	12462.9	824.36	0.0661449	4.54973e-45
ENSMUSG00000022469	Rapgef3	412.37	27.3023	0.0662083	7.68862e-26
ENSMUSG00000027314	Dll4	17634.6	1167.68	0.0662155	3.62251e-63
ENSMUSG00000037260	Hgsnat	20552.9	1365.31	0.0664291	1.12541e-169
ENSMUSG00000045954	Sdpr	50.278	3.35319	0.066693	0.00436444
ENSMUSG00000036095	Dgkb	44.0319	2.93788	0.0667216	1.90505e-10
ENSMUSG00000034910	Pygo1	2219.07	148.576	0.066954	2.62298e-91
ENSMUSG00000022687	Boc	7950.86	538.14	0.0676832	1.84204e-11
ENSMUSG00000024600	Slc27a6	316.737	21.4419	0.0676963	1.02419e-30
ENSMUSG00000075318	Scn2a1	380.129	25.7693	0.0677909	7.29613e-32
ENSMUSG00000055322	Tns1	5861.87	397.552	0.0678201	2.38217e-144
ENSMUSG00000023094	Msrb2	264.396	17.9452	0.0678722	3.79867e-28
ENSMUSG00000004891	Nes	3596.08	244.552	0.068005	1.10365e-111
ENSMUSG00000031273	Col4a6	209.297	14.2741	0.0682001	1.93242e-25
ENSMUSG00000010122	Slc47a1	1273.37	87.1725	0.0684582	8.18458e-48
ENSMUSG00000056296	Synpr	687.324	47.1804	0.0686436	0.0086253
ENSMUSG00000029307	Dmp1	10.1873	0.702424	0.0689507	0.000887244
ENSMUSG00000092251	Trav9n-1	10.1226	0.702424	0.0693919	0.00899318
ENSMUSG00000029838	Ptn	1445.83	100.76	0.0696896	7.19266e-44
ENSMUSG00000020099	Unc5b	2556.86	178.708	0.0698936	1.89022e-95
ENSMUSG00000024087	Cyp1b1	2886.89	202.129	0.0700163	2.08801e-87
ENSMUSG00000040432	Ltb4r2	218.275	15.4072	0.0705862	1.091e-10
ENSMUSG00000036880	Acaa2	3301.62	233.051	0.0705868	5.02507e-107
ENSMUSG00000034310	Tmem132d	362.54	25.6103	0.0706414	7.69653e-29
ENSMUSG00000022438	Parvb	3488.42	246.782	0.0707432	1.95901e-105
ENSMUSG00000025014	Dntt	1789.02	126.729	0.0708371	8.33303e-06
ENSMUSG00000089715	Cbx6	27927.6	1980.22	0.0709055	2.67031e-160
ENSMUSG00000036570	Fxyd1	59.0241	4.19917	0.0711433	2.87728e-08
ENSMUSG00000042099	Kank3	945.428	67.7917	0.0717048	5.11465e-53
ENSMUSG00000057457	Phex	478.531	34.3265	0.0717331	9.65749e-38
ENSMUSG00000024663	Rab3il1	135.605	9.80319	0.0722924	8.69828e-21
ENSMUSG00000058806	Col13a1	433.824	31.5322	0.0726843	1.63848e-36
ENSMUSG00000019539	Rcn3	2352.22	171.981	0.0731144	5.52596e-89
ENSMUSG00000024940	Ltbp3	13081.9	957.318	0.0731788	4.18063e-38
ENSMUSG00000092094	Zfp804b	7.623	0.558864	0.0733129	0.00756451
ENSMUSG00000056492	Gpr116	653.222	47.929	0.0733731	3.31293e-32
ENSMUSG00000048078	Odz4	9562.69	703.65	0.0735829	1.23957e-93
ENSMUSG00000002058	Unc119	3340.87	246.126	0.0736712	8.14206e-37
ENSMUSG00000053199	Arhgap20	187.044	13.8588	0.0740939	5.72984e-22
ENSMUSG00000019831	Wasf1	756.225	56.0863	0.0741662	1.44813e-44
ENSMUSG00000024039	Cbs	345.944	25.7846	0.0745341	7.49605e-34
ENSMUSG00000032125	Robo4	22.4909	1.67659	0.0745453	1.21957e-06
ENSMUSG00000038725	Pkhd1l1	19460.6	1451.34	0.0745786	5.01636e-13
ENSMUSG00000090386	2810055G20Rik	16.8062	1.26129	0.0750491	0.0521417
ENSMUSG00000048728	Zfp454	63.2945	4.75803	0.0751729	7.00859e-09
ENSMUSG00000057060	Slc35f3	296.367	22.3033	0.0752554	6.02703e-25
ENSMUSG00000033855	Ston1	354.28	26.7588	0.0755302	2.59974e-28
ENSMUSG00000020000	Moxd1	361.174	27.3023	0.0755932	6.07822e-23
ENSMUSG00000054196	Cthrc1	151.882	11.4952	0.0756849	4.95137e-07
ENSMUSG00000078670	Fam174b	2269.55	172.274	0.0759064	2.44791e-57
ENSMUSG00000026594	Ralgps2	7454.62	568.995	0.0763278	4.72535e-137
ENSMUSG00000031290	Lrch2	2850.98	217.839	0.0764085	4.25394e-70
ENSMUSG00000074059	Fbxw18	32.9916	2.52258	0.0764613	1.15494e-07
ENSMUSG00000029330	Cds1	14179.8	1086.75	0.0766408	1.25282e-152
ENSMUSG00000063275	Ptpla	348.913	26.7742	0.0767359	1.33874e-32
ENSMUSG00000038903	Ccdc68	582.985	44.8014	0.0768483	8.68819e-38
ENSMUSG00000069372	Ctxn3	69.2762	5.33227	0.0769712	1.93404e-13
ENSMUSG00000018986	Slfn3	50.7803	3.91205	0.0770387	1.39331e-09
ENSMUSG00000041731	Pgm5	9777.6	754.507	0.0771669	1.88267e-142
ENSMUSG00000026572	Tbx19	14.4577	1.11773	0.0773101	0.000347213
ENSMUSG00000036298	Slc2a13	9247.29	715.217	0.0773435	2.56394e-23
ENSMUSG00000061740	Cyp2d22	125.072	9.675	0.0773555	7.97905e-05
ENSMUSG00000030047	Arhgap25	805.164	62.3466	0.0774335	8.85377e-48
ENSMUSG00000021950	Anxa8	4025.86	312.938	0.0777321	5.0102e-125
ENSMUSG00000035653	Lrfn5	7.1749	0.558864	0.0778916	0.0109184
ENSMUSG00000013089	Etv5	2970.23	232.467	0.0782656	4.56143e-89
ENSMUSG00000031613	Hpgd	11169.4	878.8	0.0786793	1.69607e-47
ENSMUSG00000049630	C1ql3	115.57	9.10076	0.0787466	2.20654e-17
ENSMUSG00000037211	Spry1	2026.89	159.753	0.0788167	5.59792e-54
ENSMUSG00000036832	Lpar3	803.533	63.4644	0.0789816	1.03097e-43
ENSMUSG00000037111	Setd7	10778.1	851.908	0.0790409	1.45704e-34
ENSMUSG00000040483	Xaf1	2450.77	194.177	0.0792309	7.66471e-30
ENSMUSG00000043557	Mdga1	2586.37	205.559	0.0794779	1.09538e-35
ENSMUSG00000060268	Gm1661	129.942	10.3621	0.0797439	3.5347e-17
ENSMUSG00000025328	Padi3	26.4159	2.10727	0.0797729	1.81198e-06
ENSMUSG00000053007	Creb5	70.124	5.60402	0.0799159	2.75276e-05
ENSMUSG00000033149	Phldb2	2315.93	185.122	0.0799343	9.57866e-36
ENSMUSG00000079587	Gpr45	321.726	25.7693	0.080097	2.95782e-25
ENSMUSG00000022525	Hrasls	13.9449	1.11773	0.0801534	0.00100912
ENSMUSG00000050592	Fam78a	385.451	30.9426	0.0802763	4.90769e-06
ENSMUSG00000049532	Sall2	500.395	40.2177	0.0803718	3.02958e-20
ENSMUSG00000030742	Lat	1183.98	95.5247	0.080681	9.8116e-08
ENSMUSG00000066108	Muc5b	74.1674	6.01932	0.0811586	2.51931e-09
ENSMUSG00000003541	Ier3	3911.89	317.911	0.081268	1.34884e-09
ENSMUSG00000026928	Card9	73.7841	6.0347	0.0817886	2.45623e-11
ENSMUSG00000059479	B3gnt8	136.717	11.208	0.0819799	1.04585e-17
ENSMUSG00000040219	Ttc12	1586.37	130.472	0.0822452	1.02715e-64
ENSMUSG00000034028	Cd226	6.76997	0.558864	0.0825505	0.0145646
ENSMUSG00000039081	Zfp503	2312.21	191.157	0.0826729	9.44645e-81
ENSMUSG00000022150	Dab2	120.246	9.94675	0.0827203	2.47324e-20
ENSMUSG00000033763	Mtss1l	24852.6	2056.79	0.0827596	2.58997e-148
ENSMUSG00000000861	Bcl11a	2964.91	245.618	0.0828415	9.8363e-75
ENSMUSG00000002033	Cd3g	904.008	75.2979	0.0832934	2.1617e-29
ENSMUSG00000026395	Ptprc	3025.74	252.155	0.0833367	2.63928e-41
ENSMUSG00000029299	Abcg3	263.187	21.97	0.0834769	2.89102e-09
ENSMUSG00000006931	Leprel4	945.227	79.4458	0.0840494	2.14868e-31
ENSMUSG00000031342	Gpm6b	2237.26	188.834	0.0844044	2.98186e-41
ENSMUSG00000020792	Exoc7	30695.2	2591.33	0.0844213	6.94826e-144
ENSMUSG00000028496	Mllt3	896.132	75.744	0.0845233	1.7268e-51
ENSMUSG00000048826	Dact2	23373.5	1977.33	0.0845971	9.19706e-15
ENSMUSG00000040183	Ankrd6	4198.21	355.35	0.0846432	3.51388e-59
ENSMUSG00000041308	Sntb2	4453.52	377.51	0.0847665	8.27122e-18
ENSMUSG00000029843	Slc13a4	110.425	9.38788	0.0850157	3.50705e-19
ENSMUSG00000055980	Irs1	2052.08	174.489	0.0850302	6.25388e-83
ENSMUSG00000001435	Col18a1	20626	1755.25	0.0850987	3.9591e-143
ENSMUSG00000000253	Gmpr	6369.18	544.569	0.0855006	1.14519e-73
ENSMUSG00000002289	Angptl4	337.549	28.8661	0.0855167	6.55856e-21
ENSMUSG00000024538	Ppic	4030.48	344.973	0.0855909	7.38128e-102
ENSMUSG00000043753	Dmrta1	604.267	51.8564	0.085817	1.50154e-40
ENSMUSG00000072949	Acot1	1201.49	103.139	0.0858423	1.85553e-57
ENSMUSG00000046561	Arsj	42.2179	3.64031	0.0862265	5.42862e-09
ENSMUSG00000034854	Mfsd12	18803.3	1622.06	0.0862649	1.18364e-13
ENSMUSG00000023055	Calcoco1	21702.7	1876.28	0.0864536	1.13202e-143
ENSMUSG00000024353	2010001M09Rik	87.1729	7.56773	0.0868129	9.20647e-13
ENSMUSG00000017764	Zswim1	4384.53	380.914	0.0868769	1.4838e-32
ENSMUSG00000038523	1700003F12Rik	14.4793	1.26129	0.0871096	0.0144408
ENSMUSG00000037921	Ddx60	1333.19	116.249	0.0871959	9.82799e-10
ENSMUSG00000046879	Irgm1	12247.6	1070.1	0.0873723	0.00108036
ENSMUSG00000069917	Hba-a2	6.38663	0.558864	0.0875053	0.0327316
ENSMUSG00000022758	P2rx6	541.285	47.3855	0.0875425	2.04201e-22
ENSMUSG00000045659	Plekha7	10984.9	962.409	0.087612	8.26871e-111
ENSMUSG00000027634	Ndrg3	35623.5	3124.17	0.0876997	2.13961e-136
ENSMUSG00000031661	Nkd1	551.311	48.4263	0.0878385	7.50989e-35
ENSMUSG00000066090	Insl5	19.0251	1.67659	0.0881253	0.0119576
ENSMUSG00000049744	Arhgap15	166.68	14.6894	0.0881296	4.48552e-15
ENSMUSG00000075592	Nynrin	3706.11	326.628	0.0881323	3.08759e-60
ENSMUSG00000024810	Il33	212.477	18.7604	0.0882937	5.58111e-27
ENSMUSG00000029204	Rhoh	495.202	43.8119	0.0884727	2.48061e-30
ENSMUSG00000047473	Zfp30	483.806	43.0427	0.088967	1.47517e-32
ENSMUSG00000038074	Fkbp14	649.163	57.8757	0.0891544	1.02637e-36
ENSMUSG00000046312	AI464131	895.759	79.8611	0.0891547	4.19024e-47
ENSMUSG00000026980	Ly75	57656.7	5148.24	0.0892914	1.89663e-123
ENSMUSG00000022421	Nptxr	197.263	17.658	0.0895151	5.72751e-09
ENSMUSG00000074604	Mgst2	36.0256	3.225	0.0895197	6.65694e-07
ENSMUSG00000061013	Mkx	678.823	60.7982	0.0895641	2.79704e-39
ENSMUSG00000030217	Art4	406.388	36.4338	0.0896528	3.81865e-15
ENSMUSG00000028758	Kif17	511.922	45.9499	0.0897596	1.92957e-30
ENSMUSG00000062074	Wisp3	32.673	2.93788	0.0899177	2.2151e-07
ENSMUSG00000050345	4930486L24Rik	6.21392	0.558864	0.0899374	0.0246784
ENSMUSG00000032531	Amotl2	5384.24	484.735	0.0900285	3.06988e-14
ENSMUSG00000037161	4930583H14Rik	83.8798	7.56773	0.0902211	2.06863e-14
ENSMUSG00000034021	Pds5b	70434.6	6358.36	0.0902732	4.45803e-86
ENSMUSG00000072623	Zfp9	893.552	80.6763	0.0902872	1.52839e-27
ENSMUSG00000073679	Gm10562	13.9665	1.26129	0.0903084	0.000559662
ENSMUSG00000038526	Car14	583.412	52.7998	0.0905018	2.96871e-34
ENSMUSG00000028386	Slc46a2	26439.2	2399.69	0.0907627	8.61899e-120
ENSMUSG00000015396	Cd83	28759.4	2620.57	0.0911203	9.92538e-28
ENSMUSG00000032503	Arpp21	938.609	85.8497	0.0914648	5.90422e-20
ENSMUSG00000037016	Frem2	15751.9	1441.67	0.0915241	2.19277e-134
ENSMUSG00000028755	Cda	7.66617	0.702424	0.0916264	0.00942357
ENSMUSG00000052180	Serpinb6c	91.6539	8.39834	0.091631	8.37445e-15
ENSMUSG00000044217	Aqp5	322.611	29.6813	0.0920035	6.56131e-29
ENSMUSG00000059547	Fbxw26	22.869	2.10727	0.0921454	0.00126965
ENSMUSG00000001123	Lgals9	24933.9	2297.9	0.0921597	5.96892e-132
ENSMUSG00000021209	Ppp4r4	768.264	70.9193	0.0923111	5.96219e-30
ENSMUSG00000063646	Jakmip1	228.489	21.1394	0.0925182	1.30325e-13
ENSMUSG00000047495	Dlgap2	36.3442	3.36856	0.0926851	1.33711e-08
ENSMUSG00000034903	Cobll1	7036.4	653.63	0.0928926	1.96521e-53
ENSMUSG00000041378	Cldn5	19.5217	1.82015	0.0932377	0.000466713
ENSMUSG00000019856	Fam184a	108.077	10.0903	0.0933624	3.3142e-15
ENSMUSG00000038058	Nod1	400.563	37.5515	0.0937469	3.09753e-11
ENSMUSG00000060548	Tnfrsf19	2059.2	193.3	0.0938714	1.78264e-69
ENSMUSG00000073600	Gm1614	301.129	28.2765	0.0939014	8.42582e-26
ENSMUSG00000026430	Rassf5	7274.84	684.039	0.094028	1.29102e-119
ENSMUSG00000051790	Nlgn2	2776.29	261.887	0.0943298	6.36146e-12
ENSMUSG00000035274	Tpbg	1910.16	180.303	0.0943916	5.4427e-71
ENSMUSG00000025931	Paqr8	771.033	72.8676	0.0945065	1.86699e-42
ENSMUSG00000044749	Abca6	50.2674	4.75803	0.0946544	3.48548e-09
ENSMUSG00000029641	Rasl11a	320.036	30.4145	0.0950346	2.24059e-24
ENSMUSG00000038351	Sgsm2	5124.78	487.498	0.0951257	1.56666e-107
ENSMUSG00000022683	Pla2g10	79.5231	7.56773	0.095164	1.64576e-13
ENSMUSG00000079598	Clec2l	48.3887	4.62985	0.0956804	2.8787e-07
ENSMUSG00000061576	Dpp6	4951.04	474.152	0.0957682	3.41826e-17
ENSMUSG00000029287	Tgfbr3	6740.25	646.877	0.0959723	4.81818e-43
ENSMUSG00000028402	Mpdz	2466.11	236.697	0.09598	1.13708e-68
ENSMUSG00000005973	Rcn1	15973.9	1534.09	0.0960376	1.77138e-133
ENSMUSG00000023341	Mx2	599.15	57.5886	0.0961171	5.56142e-05
ENSMUSG00000006958	Chrd	452.363	43.5862	0.0963523	9.02448e-09
ENSMUSG00000022816	Fstl1	14221.6	1372.45	0.0965048	1.10219e-132
ENSMUSG00000072553	Gm525	46.2345	4.47092	0.0967008	2.10046e-05
ENSMUSG00000047842	Diras2	8927.67	863.967	0.0967741	1.14387e-94
ENSMUSG00000032318	Isl2	381.441	37.008	0.0970218	2.91942e-27
ENSMUSG00000035491	1600014K23Rik	5.74423	0.558864	0.0972914	0.0371626
ENSMUSG00000045932	Ifit2	1959.2	191.495	0.0977416	9.7838e-21
ENSMUSG00000033355	Rtp4	1669.98	163.332	0.0978044	5.48751e-33
ENSMUSG00000020814	Mxra7	313.104	30.6862	0.0980066	4.06958e-24
ENSMUSG00000002808	Epdr1	1002.25	98.2369	0.0980165	2.82034e-47
ENSMUSG00000025389	Mip	7.15331	0.702424	0.0981957	0.00766996
ENSMUSG00000038702	Dsel	1319.42	129.641	0.0982558	3.5213e-52
ENSMUSG00000060594	Layn	143.681	14.1459	0.0984536	9.46146e-11
ENSMUSG00000036557	1700011E24Rik	7.13172	0.702424	0.098493	0.0111786
ENSMUSG00000036225	Kctd1	5526.54	544.651	0.0985519	9.99074e-110
ENSMUSG00000056870	Gulp1	745.147	73.6982	0.0989043	1.22769e-38
ENSMUSG00000073176	Zfp449	851.345	84.2038	0.0989069	2.91221e-39
ENSMUSG00000054893	Zfp667	437.037	43.2684	0.099004	3.33561e-20
ENSMUSG00000027796	Smad9	1040.76	103.154	0.0991137	4.45255e-44
ENSMUSG00000040710	St8sia4	111.197	11.0645	0.0995032	7.42748e-15
ENSMUSG00000035158	Mitf	912.318	90.8795	0.0996138	4.14378e-25
ENSMUSG00000023913	Pla2g7	365.471	36.5312	0.0999566	1.15689e-31
ENSMUSG00000058571	Gpc6	659.453	65.9869	0.100063	1.16513e-37
ENSMUSG00000035045	Zc3h12b	58.4465	5.87576	0.100532	1.08557e-09
ENSMUSG00000038552	Fndc4	251.602	25.3693	0.100831	9.66337e-19
ENSMUSG00000040296	Ddx58	7609.38	767.412	0.100851	4.49339e-21
ENSMUSG00000007989	Fzd3	1125.85	113.629	0.100927	4.44556e-48
ENSMUSG00000053110	Yap1	10001	1011.97	0.101188	5.62254e-125
ENSMUSG00000025887	Casp12	1406.37	142.433	0.101277	1.29434e-24
ENSMUSG00000004032	Gstm5	499.402	50.5797	0.101281	2.59802e-38
ENSMUSG00000029153	Ociad2	9323.69	944.951	0.10135	6.04187e-122
ENSMUSG00000021835	Bmp4	55.2882	5.60402	0.10136	7.35759e-10
ENSMUSG00000030498	Gas2	698.61	70.8885	0.101471	3.21436e-38
ENSMUSG00000090290	Gm17296	1956.14	198.679	0.101567	1.16024e-64
ENSMUSG00000034614	Pik3ip1	3570	362.744	0.101609	2.85258e-81
ENSMUSG00000054679	Srsf12	693.292	70.6475	0.101902	9.267e-33
ENSMUSG00000031298	Gpr64	4527.1	463.426	0.102367	1.04537e-17
ENSMUSG00000020234	4930404N11Rik	5635.61	577.096	0.102402	2.70079e-10
ENSMUSG00000002799	Jag2	16506.3	1690.36	0.102407	2.94247e-32
ENSMUSG00000009292	Trpm2	15692.2	1608.15	0.102481	4.00441e-127
ENSMUSG00000052142	Rasal3	710.783	73.0471	0.10277	7.41427e-09
ENSMUSG00000052305	Hbb-b1	24.4992	2.52258	0.102966	0.00880558
ENSMUSG00000038065	2410066E13Rik	800.721	82.5119	0.103047	3.66479e-41
ENSMUSG00000032827	Ppp1r9a	2229.03	229.878	0.103129	3.85822e-21
ENSMUSG00000026730	Pter	896.375	92.8893	0.103628	5.81138e-42
ENSMUSG00000022439	Parvg	445.69	46.1909	0.103639	1.39515e-09
ENSMUSG00000037747	Phyhipl	301.291	31.2297	0.103653	8.3739e-24
ENSMUSG00000021903	Galntl2	170.113	17.6427	0.103711	7.036e-19
ENSMUSG00000061039	Olfr920	506.61	52.5434	0.103716	1.54409e-19
ENSMUSG00000037625	Cldn11	29.6821	3.08144	0.103815	6.29236e-06
ENSMUSG00000000409	Lck	2637.19	274.238	0.103989	6.79277e-18
ENSMUSG00000058361	Lhfpl3	6.74838	0.702424	0.104088	0.0708958
ENSMUSG00000056758	Hmga2	154.711	16.125	0.104227	1.22328e-14
ENSMUSG00000026187	Xrcc5	7803.8	813.752	0.104276	4.95396e-78
ENSMUSG00000048612	Myof	6130.43	641.524	0.104646	1.58698e-114
ENSMUSG00000020376	Rnf130	2611.61	273.607	0.104766	2.61106e-79
ENSMUSG00000078451	Ppil6	136.112	14.2895	0.104983	7.8715e-19
ENSMUSG00000034833	Tespa1	141.219	14.833	0.105035	4.01162e-16
ENSMUSG00000025461	Cd163l1	18.685	1.96371	0.105096	0.000229071
ENSMUSG00000068979	Gm5848	6.68362	0.702424	0.105096	0.0179104
ENSMUSG00000063887	Nlgn1	2611.39	275.079	0.105338	6.88147e-71
ENSMUSG00000055172	C1ra	447.98	47.2112	0.105387	1.05955e-06
ENSMUSG00000067878	Mtap7d3	150.997	15.9661	0.105738	6.90614e-18
ENSMUSG00000002980	Bcam	4358.53	466.872	0.107117	1.08632e-22
ENSMUSG00000060961	Slc4a4	4684.66	503.854	0.107554	1.70311e-33
ENSMUSG00000032387	Rbpms2	89.7968	9.675	0.107743	1.74432e-11
ENSMUSG00000074140	Zfp319	1819.38	196.141	0.107806	1.68807e-56
ENSMUSG00000022464	Slc38a4	3245.53	351.428	0.10828	7.41553e-29
ENSMUSG00000039097	Rln1	16.8062	1.82015	0.108303	8.49248e-05
ENSMUSG00000004035	Gstm7	29.7469	3.225	0.108415	4.3802e-08
ENSMUSG00000035407	Kank4	157.491	17.0992	0.108572	4.05937e-20
ENSMUSG00000019718	2810055F11Rik	358.798	38.9564	0.108575	1.74002e-24
ENSMUSG00000054263	Lifr	22282.1	2426.7	0.108908	6.1406e-10
ENSMUSG00000050064	Zfp697	916.869	100.072	0.109146	2.1723e-38
ENSMUSG00000028497	Ptplad2	421.256	45.9806	0.109151	1.1905e-28
ENSMUSG00000021876	Rnase4	3136.18	342.681	0.109267	1.419e-91
ENSMUSG00000050910	Cdr2l	3617.42	395.291	0.109274	2.8555e-83
ENSMUSG00000024784	Gpha2	83.2211	9.10076	0.109356	1.94013e-13
ENSMUSG00000018378	Cuedc1	5296.83	579.921	0.109485	2.24606e-85
ENSMUSG00000048376	F2r	2798.85	306.56	0.10953	6.67067e-79
ENSMUSG00000020846	Fam101b	2031.02	222.5	0.109551	2.02669e-20
ENSMUSG00000037605	Lphn3	1437.77	157.871	0.109803	2.10592e-57
ENSMUSG00000050394	Armcx6	737.162	81.1378	0.110068	2.58629e-39
ENSMUSG00000090441	Gm17651	58.4465	6.45	0.110357	4.96875e-09
ENSMUSG00000039328	Rnf122	1269.66	140.993	0.111047	1.73648e-06
ENSMUSG00000032094	Cd3d	665.768	73.9392	0.111059	1.88031e-05
ENSMUSG00000047428	Dlk2	1544.25	171.587	0.111113	4.70196e-36
ENSMUSG00000032456	Nmnat3	1074.91	119.822	0.111472	5.98258e-43
ENSMUSG00000028730	Wdr65	105.108	11.7669	0.111951	5.85485e-06
ENSMUSG00000036856	Wnt4	17415.4	1954.55	0.112231	9.88402e-23
ENSMUSG00000047197	Gjd3	6.2571	0.702424	0.11226	0.0878861
ENSMUSG00000017667	Zfp334	679.746	76.349	0.11232	3.59481e-35
ENSMUSG00000042359	Osbpl6	4843.64	546.287	0.112784	6.81305e-43
ENSMUSG00000000126	Wnt9a	413.32	46.6677	0.112909	3.34059e-28
ENSMUSG00000017724	Etv4	737.318	83.3732	0.113076	4.55143e-41
ENSMUSG00000047033	Pcdhb15	35.9608	4.07099	0.113206	1.68134e-07
ENSMUSG00000048142	Nat8l	429.467	48.7288	0.113463	5.89554e-27
ENSMUSG00000063160	Numbl	629.144	71.7499	0.114044	5.30573e-36
ENSMUSG00000020315	Spnb2	47747.4	5451.05	0.114164	4.77067e-79
ENSMUSG00000033156	Cst10	4.89121	0.558864	0.114259	0.0938559
ENSMUSG00000038572	Bpifb5	4.89121	0.558864	0.114259	0.0847483
ENSMUSG00000003849	Nqo1	16411.9	1878.94	0.114486	4.78614e-117
ENSMUSG00000021238	Aldh6a1	3521.61	403.92	0.114698	2.78893e-59
ENSMUSG00000042439	Zfp532	1384.99	159.051	0.114839	9.53731e-15
ENSMUSG00000028071	Sh2d2a	215.689	24.7951	0.114958	8.97479e-20
ENSMUSG00000079105	C7	4.84803	0.558864	0.115277	0.0689842
ENSMUSG00000021913	Ogdhl	341.188	39.3717	0.115396	2.42376e-28
ENSMUSG00000009418	Nav1	9005.07	1039.71	0.115458	7.50617e-41
ENSMUSG00000021127	Zfp36l1	17209.9	1988.7	0.115556	3.22948e-14
ENSMUSG00000031871	Cdh5	128.321	14.8637	0.115832	0.000669795
ENSMUSG00000068079	Tcf15	21.7406	2.52258	0.116031	5.08944e-05
ENSMUSG00000020014	Gm872	164.834	19.1757	0.116334	3.95572e-17
ENSMUSG00000017760	Ctsa	27440.8	3206.1	0.116837	9.4709e-111
ENSMUSG00000021066	Atl1	439.59	51.395	0.116916	7.17168e-27
ENSMUSG00000022676	Snai2	2472.93	289.425	0.117037	1.4295e-17
ENSMUSG00000091890	A830073O21Rik	234.46	27.4459	0.11706	1.31417e-12
ENSMUSG00000034813	Grip1	1499.47	175.642	0.117136	3.11311e-18
ENSMUSG00000084085	Gm16140	16.7414	1.96371	0.117297	0.000321995
ENSMUSG00000025991	Cps1	442.052	51.9846	0.117598	3.38799e-36
ENSMUSG00000019960	Dusp6	3230.64	380.263	0.117705	2.65369e-15
ENSMUSG00000040875	Osbpl10	5554.39	654.045	0.117753	1.04599e-92
ENSMUSG00000022309	Angpt1	1651.17	195.12	0.118171	1.17144e-55
ENSMUSG00000013076	Amotl1	27851.9	3301.84	0.11855	1.96342e-44
ENSMUSG00000046027	Stard5	5819.29	690.176	0.118602	7.37607e-100
ENSMUSG00000067586	S1pr3	15718.5	1867.11	0.118785	1.16109e-48
ENSMUSG00000087444	Gm5475	128.381	15.2636	0.118893	1.79249e-13
ENSMUSG00000042680	Fam59a	1206.58	143.551	0.118974	2.29609e-26
ENSMUSG00000062929	Cfl2	6290.35	748.431	0.118981	2.01737e-100
ENSMUSG00000044033	Ccdc141	2949.04	351.859	0.119313	2.20129e-19
ENSMUSG00000046550	Spin2	152.341	18.2015	0.119479	1.55108e-15
ENSMUSG00000015476	Prrt1	243.757	29.1378	0.119536	0.000111038
ENSMUSG00000033436	Armcx2	4386	525.193	0.119743	4.72731e-95
ENSMUSG00000049598	Vsig8	468.808	56.2145	0.119909	2.26567e-29
ENSMUSG00000029270	Fam69a	4078.41	489.8	0.120096	8.03979e-89
ENSMUSG00000029070	Mxra8	418.049	50.2926	0.120303	6.87691e-25
ENSMUSG00000027577	Chrna4	734.732	88.4184	0.120341	8.43844e-41
ENSMUSG00000020620	Abca8b	378.952	45.6628	0.120497	5.06729e-16
ENSMUSG00000045094	Arhgef37	298.414	36.0031	0.120648	8.14863e-24
ENSMUSG00000032864	Rag2	215.77	26.0564	0.12076	1.16577e-17
ENSMUSG00000067818	Myl9	690.295	83.4194	0.120846	8.48249e-37
ENSMUSG00000035692	Isg15	4114.89	497.753	0.120964	2.78618e-24
ENSMUSG00000026478	Lamc1	17514.4	2122.08	0.121162	2.3007e-92
ENSMUSG00000073293	Nudt10	219.787	26.6306	0.121166	1.78725e-19
ENSMUSG00000039323	Igfbp2	1354.27	164.157	0.121215	5.49495e-33
ENSMUSG00000036749	Pramel5	21.9944	2.66614	0.121219	1.37772e-05
ENSMUSG00000015879	Fam184b	90.0774	10.9363	0.12141	1.40182e-07
ENSMUSG00000032035	Ets1	4081.65	495.635	0.12143	4.81643e-49
ENSMUSG00000051343	Rab11fip5	3488.43	428.73	0.122901	2.67536e-80
ENSMUSG00000039145	Camk1d	2141.38	263.266	0.122942	7.91013e-65
ENSMUSG00000030313	Dennd5b	2490.42	306.77	0.12318	6.93202e-29
ENSMUSG00000042436	Mfap4	42.11	5.18871	0.123218	2.11177e-09
ENSMUSG00000022431	Ribc2	30.6863	3.78387	0.123308	0.000609782
ENSMUSG00000053930	Shisa6	1307.51	161.337	0.123392	2.47966e-50
ENSMUSG00000027784	Ppm1l	10223.4	1261.95	0.123437	6.7369e-106
ENSMUSG00000058173	BC017612	1238.83	153	0.123504	8.9772e-43
ENSMUSG00000030064	Frmd4b	2490.37	307.79	0.123592	6.18115e-77
ENSMUSG00000034761	Map4k5	5105.61	631.752	0.123737	1.09605e-29
ENSMUSG00000068696	Gpr88	522.887	64.8846	0.124089	1.08286e-30
ENSMUSG00000038205	Prkab2	3686.59	458.345	0.124328	5.27078e-31
ENSMUSG00000033059	Pygb	15197.6	1902.55	0.125187	1.93292e-109
ENSMUSG00000031327	Chic1	940.424	118.115	0.125598	1.88334e-30
ENSMUSG00000031434	Morc4	1828.1	230.047	0.12584	5.68089e-46
ENSMUSG00000028270	Gbp2	5262.16	662.474	0.125894	3.53755e-09
ENSMUSG00000022475	Hdac7	7136.77	901.991	0.126386	9.66516e-73
ENSMUSG00000029913	Prdm5	367.723	46.5395	0.126561	1.00186e-24
ENSMUSG00000031351	Zfp185	539.267	68.3506	0.126747	4.64001e-31
ENSMUSG00000029314	Agpat9	701.4	88.9465	0.126813	2.72076e-32
ENSMUSG00000048424	Ranbp3l	72.6936	9.24432	0.127168	9.09661e-11
ENSMUSG00000030757	Zkscan2	82.3628	10.521	0.12774	6.23888e-11
ENSMUSG00000041959	S100a10	7412.39	947.628	0.127844	2.92297e-101
ENSMUSG00000053279	Aldh1a1	248.125	31.7886	0.128115	7.23247e-23
ENSMUSG00000046152	Fut10	452.38	57.9885	0.128186	1.37978e-26
ENSMUSG00000039607	Rbms3	6091.45	781.081	0.128226	1.47504e-31
ENSMUSG00000022847	Thpo	78.4973	10.0903	0.128543	2.73508e-05
ENSMUSG00000020019	Ntn4	190.823	24.6515	0.129185	1.63495e-21
ENSMUSG00000060814	Gm4980	161.956	21.0112	0.129734	1.65228e-15
ENSMUSG00000030218	Mgp	578.456	75.1031	0.129834	5.33942e-06
ENSMUSG00000050545	A830093I24Rik	46.3372	6.01932	0.129903	1.03178e-07
ENSMUSG00000054072	Iigp1	14391.3	1873.55	0.130186	0.00131746
ENSMUSG00000042200	Cdrt4	22.5504	2.93788	0.130281	0.000147603
ENSMUSG00000046317	BC107364	70.8959	9.24432	0.130393	8.77506e-10
ENSMUSG00000017344	Vtn	5.38249	0.702424	0.130502	0.0525639
ENSMUSG00000021388	Aspn	14.9922	1.96371	0.130982	0.000152554
ENSMUSG00000052512	Nav2	48737.1	6398.94	0.131295	9.07014e-20
ENSMUSG00000048978	Nrsn1	122.616	16.1096	0.131383	6.81361e-13
ENSMUSG00000046109	AB041806	54.3704	7.15243	0.13155	3.36481e-08
ENSMUSG00000078872	Gm14401	5.33931	0.702424	0.131557	0.0536326
ENSMUSG00000034645	Zyg11a	52.1246	6.86531	0.131709	1.20165e-06
ENSMUSG00000074364	Ehd2	809.018	106.62	0.131789	2.37375e-15
ENSMUSG00000024232	Bambi	557.784	73.5393	0.131842	8.87794e-33
ENSMUSG00000020642	Rnf144a	286.218	37.8079	0.132095	6.20399e-22
ENSMUSG00000052759	Gpr25	934.441	123.576	0.132245	5.48689e-17
ENSMUSG00000078868	Gm14412	43.4543	5.74758	0.132267	1.89712e-05
ENSMUSG00000049649	Gpr3	44.5395	5.89114	0.132268	0.0501819
ENSMUSG00000047344	Lancl3	485.22	64.4539	0.132834	5.74977e-28
ENSMUSG00000070390	Nlrp1b	3810.32	507.602	0.133218	1.27076e-07
ENSMUSG00000025555	Farp1	9521.65	1270.31	0.133413	3.99416e-100
ENSMUSG00000011148	Adssl1	401.324	53.5484	0.133429	1.09785e-26
ENSMUSG00000052889	Prkcb	620.975	82.8964	0.133494	4.40732e-18
ENSMUSG00000016087	Fli1	123.587	16.5249	0.133711	0.000478035
ENSMUSG00000063455	D630045J12Rik	1120.5	149.965	0.133837	1.06927e-41
ENSMUSG00000021589	Rhobtb3	1693.91	227.058	0.134044	3.77028e-37
ENSMUSG00000020639	Pfn4	29.2988	3.92743	0.134047	8.8427e-06
ENSMUSG00000057058	Skap1	479.729	64.4078	0.134259	1.46462e-10
ENSMUSG00000034898	Filip1	469.337	63.0183	0.134271	3.4074e-27
ENSMUSG00000037580	Gch1	3106.6	417.999	0.134552	6.36362e-69
ENSMUSG00000052698	Tln2	3344.96	450.096	0.134559	4.43401e-74
ENSMUSG00000015652	Steap1	31.1992	4.19917	0.134592	2.86782e-06
ENSMUSG00000063564	Col23a1	163.435	22.0008	0.134615	2.51456e-19
ENSMUSG00000060559	Gm10083	106.263	14.3049	0.134618	1.03095e-11
ENSMUSG00000039883	Lrrc17	2309.03	311.666	0.134977	3.96901e-68
ENSMUSG00000023972	Ptk7	8312.63	1122.43	0.135027	4.23449e-76
ENSMUSG00000021474	Sfxn1	7270.39	982.349	0.135116	4.96109e-91
ENSMUSG00000070601	Vmn2r84	8.20063	1.11773	0.136298	0.0214076
ENSMUSG00000051098	Mblac2	1235.07	168.746	0.136629	5.393e-40
ENSMUSG00000040086	Tnni3k	8.17904	1.11773	0.136658	0.0471696
ENSMUSG00000032093	Cd3e	547.342	74.9955	0.137017	1.59587e-05
ENSMUSG00000009739	Pou6f1	1412.95	193.649	0.137053	4.76197e-50
ENSMUSG00000022947	Cbr3	1244.58	171.043	0.137431	5.75343e-43
ENSMUSG00000029309	Sparcl1	236.231	32.491	0.137539	3.52487e-08
ENSMUSG00000045826	Ptprcap	268.569	37.008	0.137797	2.46908e-06
ENSMUSG00000046807	AI646023	261.449	36.1467	0.138255	3.85329e-20
ENSMUSG00000022836	Mylk	8602.28	1189.76	0.138307	5.14677e-58
ENSMUSG00000062704	9430002A10Rik	9.11843	1.26129	0.138323	0.0108569
ENSMUSG00000022537	Tmem44	148.783	20.5959	0.138429	6.65563e-15
ENSMUSG00000048040	Arxes2	356.131	49.3031	0.138441	2.38837e-22
ENSMUSG00000024900	Cpt1a	22451.8	3111.29	0.138576	1.41468e-98
ENSMUSG00000000037	Scml2	236.286	32.7935	0.138788	6.76771e-19
ENSMUSG00000026674	Ddr2	102.802	14.2741	0.13885	4.80831e-12
ENSMUSG00000015305	Sash1	2732.41	380.704	0.139329	1.37362e-38
ENSMUSG00000022951	Rcan1	5808.4	811.414	0.139697	2.02123e-30
ENSMUSG00000023132	Gzma	134.531	18.904	0.140518	3.70848e-10
ENSMUSG00000059708	Akap17b	1315.76	185.589	0.141051	3.16656e-43
ENSMUSG00000042340	Ctf1	1287.93	181.867	0.141208	3.18118e-40
ENSMUSG00000078921	Tgtp2	482.068	68.0942	0.141254	8.41502e-07
ENSMUSG00000060275	Nrg2	99.1527	14.0177	0.141375	8.60716e-13
ENSMUSG00000050164	Mchr1	16.8062	2.37902	0.141556	0.000653266
ENSMUSG00000023030	Slc11a2	5953.47	842.864	0.141575	9.07921e-87
ENSMUSG00000057751	Megf6	15713.4	2229.34	0.141875	1.00043e-59
ENSMUSG00000048772	Tmem53	645.518	91.6588	0.141992	5.2301e-30
ENSMUSG00000024544	D18Ertd653e	462.227	65.6844	0.142104	7.0558e-27
ENSMUSG00000034112	Atp2c2	142.666	20.2934	0.142244	1.91513e-11
ENSMUSG00000027230	Creb3l1	944.693	134.496	0.14237	6.17038e-42
ENSMUSG00000036106	Prr5	148.567	21.1548	0.142392	1.05404e-14
ENSMUSG00000036411	9530077C05Rik	105.108	14.9919	0.142634	4.77726e-12
ENSMUSG00000038349	Plcl1	55.909	7.98304	0.142786	3.19892e-09
ENSMUSG00000070509	Rgma	1497.74	214.004	0.142885	2.51457e-15
ENSMUSG00000029406	Pitpnm2	2216.07	317.301	0.143182	1.32513e-38
ENSMUSG00000026639	Lamb3	10159	1456.42	0.143363	3.42537e-21
ENSMUSG00000031486	Gpr124	276.436	39.6588	0.143465	5.08494e-22
ENSMUSG00000016918	Sulf1	13642	1957.24	0.143472	3.92985e-49
ENSMUSG00000054364	Rhob	18395.8	2640.28	0.143526	2.88128e-31
ENSMUSG00000016982	Pom121l2	63.5104	9.11614	0.143538	2.11595e-08
ENSMUSG00000034768	Asb16	25.347	3.64031	0.143619	2.42364e-05
ENSMUSG00000036596	Cpz	8.77827	1.26129	0.143683	0.0188823
ENSMUSG00000028780	Sema3c	655.787	94.3916	0.143936	6.51817e-35
ENSMUSG00000031214	Ophn1	340.416	49.1595	0.14441	1.46934e-23
ENSMUSG00000044164	Rnf182	41.4729	6.01932	0.145139	4.17572e-07
ENSMUSG00000074521	Gm14327	17.3622	2.52258	0.145291	0.000704869
ENSMUSG00000022378	Fam49b	10894.3	1583.76	0.145376	6.34212e-14
ENSMUSG00000046743	Fat4	2779.79	404.381	0.145472	8.34315e-33
ENSMUSG00000034993	Vat1	7595.92	1108.78	0.145971	1.74009e-39
ENSMUSG00000038248	Sobp	414.178	60.5265	0.146136	9.59031e-08
ENSMUSG00000029660	4930588N13Rik	8.62715	1.26129	0.1462	0.0170005
ENSMUSG00000032013	Trim29	24314.1	3557.68	0.146321	4.24234e-89
ENSMUSG00000021482	1110018J18Rik	3657.57	536.017	0.14655	3.48618e-74
ENSMUSG00000026080	Chst10	129.925	19.0629	0.146722	3.73511e-14
ENSMUSG00000043384	Gprasp1	6704.35	984.016	0.146773	6.01302e-85
ENSMUSG00000026637	Traf5	684.098	100.503	0.146913	6.22379e-35
ENSMUSG00000029781	Fkbp9	8088.51	1192.42	0.147422	6.67728e-91
ENSMUSG00000035615	Frmpd1	760.112	112.08	0.147452	5.82032e-36
ENSMUSG00000022324	Matn2	131.977	19.4628	0.147472	3.61534e-14
ENSMUSG00000027800	Tm4sf1	40.7925	6.01932	0.147559	6.81341e-07
ENSMUSG00000058248	Kcnh1	1199.2	177.206	0.14777	5.59594e-23
ENSMUSG00000025551	Fgf14	16061.4	2375.66	0.147911	1.03553e-19
ENSMUSG00000034164	Emid1	100.912	14.9765	0.148411	1.47417e-05
ENSMUSG00000020900	Myh10	7770.17	1155.13	0.148662	8.84965e-72
ENSMUSG00000038623	Tm6sf1	339.968	50.6772	0.149065	1.58771e-20
ENSMUSG00000090919	Pabpc4l	575.956	85.8804	0.149109	3.22833e-27
ENSMUSG00000038128	Camk4	17367.8	2592.07	0.149246	9.74366e-42
ENSMUSG00000059898	Dsc3	22210.6	3320.73	0.149511	1.5172e-91
ENSMUSG00000053467	A530088E08Rik	73.9136	11.0645	0.149695	0.000877251
ENSMUSG00000028268	Gbp3	4232.78	634.879	0.149991	2.94193e-11
ENSMUSG00000044043	Pcdhb14	126.675	19.0629	0.150486	2.97007e-13
ENSMUSG00000017144	Rnd3	3809.39	573.492	0.150547	9.85281e-09
ENSMUSG00000002059	Rab34	2393.48	360.411	0.15058	2.02785e-59
ENSMUSG00000026657	Frmd4a	8628.91	1300.53	0.150718	1.37132e-42
ENSMUSG00000029869	Ephb6	1628.27	245.572	0.150818	3.30045e-56
ENSMUSG00000024601	Isoc1	5048.45	765.366	0.151604	6.03875e-78
ENSMUSG00000030339	Ltbr	7008.06	1063.09	0.151695	2.97905e-26
ENSMUSG00000048763	Hoxb3	201.955	30.6709	0.15187	5.36025e-16
ENSMUSG00000049436	Upk1b	7.32602	1.11773	0.15257	0.0499186
ENSMUSG00000047976	Kcna1	1309.91	200.135	0.152786	4.8457e-37
ENSMUSG00000049791	Fzd4	286.11	43.7144	0.152789	4.78694e-19
ENSMUSG00000020142	Slc1a4	3901.22	596.836	0.152987	1.19541e-17
ENSMUSG00000017734	Dbndd2	2201.94	337.313	0.153189	1.21046e-54
ENSMUSG00000027378	Nphp1	3236.5	495.974	0.153244	7.41023e-68
ENSMUSG00000060703	Cd302	96.0539	14.7202	0.153249	9.57723e-10
ENSMUSG00000021665	Hexb	14068.4	2161.42	0.153637	7.92736e-78
ENSMUSG00000046637	Ttc34	7.26125	1.11773	0.153931	0.0274527
ENSMUSG00000025082	Vwa2	359.873	55.3993	0.153941	1.01548e-23
ENSMUSG00000021226	Acot2	618.314	95.2837	0.154102	2.19068e-26
ENSMUSG00000007655	Cav1	142.736	22.0008	0.154136	0.00013458
ENSMUSG00000003500	Impdh1	1684.18	260.097	0.154435	3.94184e-47
ENSMUSG00000022364	Wdr67	2639.43	408.596	0.154805	1.09522e-59
ENSMUSG00000020020	Usp44	16.2933	2.52258	0.154823	0.00153532
ENSMUSG00000026365	Cfh	167.954	26.0103	0.154865	9.35672e-15
ENSMUSG00000032860	P2ry2	214.275	33.1934	0.154911	6.03073e-17
ENSMUSG00000020871	Dlx4	74.189	11.4952	0.154944	1.76707e-09
ENSMUSG00000001588	Acap1	643.78	99.8674	0.155127	4.87465e-12
ENSMUSG00000038594	Gm9766	69.3141	10.7774	0.155486	3.91893e-06
ENSMUSG00000053985	Zfp14	218.626	34.0394	0.155697	2.69902e-15
ENSMUSG00000069835	Sat2	142.245	22.1597	0.155785	1.23424e-13
ENSMUSG00000062604	Srpk2	11703.3	1823.77	0.155834	1.27336e-88
ENSMUSG00000024302	Dtna	221.941	34.5983	0.15589	1.91206e-17
ENSMUSG00000025104	Hdgfrp3	3344.48	522.409	0.1562	1.08587e-33
ENSMUSG00000015437	Gzmb	8.98889	1.40485	0.156287	0.00787106
ENSMUSG00000025036	Sfxn2	2196.64	343.645	0.156441	4.06851e-53
ENSMUSG00000058056	Palld	7618.53	1193.14	0.156611	7.07787e-85
ENSMUSG00000042156	Dzip1	1928.13	302.904	0.157097	8.45949e-50
ENSMUSG00000050288	Fzd2	1974.46	310.241	0.157127	1.43633e-55
ENSMUSG00000062373	Tmem65	4759.22	747.832	0.157133	3.51716e-76
ENSMUSG00000038668	Lpar1	5469.89	859.814	0.15719	5.44399e-54
ENSMUSG00000048191	Muc6	57.0537	8.97258	0.157265	5.12447e-07
ENSMUSG00000024556	Me2	9324.71	1468.13	0.157445	9.24858e-87
ENSMUSG00000035085	1700020L24Rik	347.763	54.7635	0.157474	1.4328e-20
ENSMUSG00000026546	Ccdc19	740.104	116.71	0.157694	4.93588e-33
ENSMUSG00000000296	Tpd52l1	294.16	46.3959	0.157724	6.90421e-19
ENSMUSG00000032348	Gsta4	4816.92	760.752	0.157933	1.7043e-52
ENSMUSG00000022468	Endou	751.624	119.012	0.15834	1.23112e-17
ENSMUSG00000051950	B3galtl	1192.38	188.845	0.158377	3.20566e-37
ENSMUSG00000073295	Nudt11	497.286	78.8716	0.158604	5.34753e-24
ENSMUSG00000019997	Ctgf	167.63	26.6306	0.158865	1.89762e-11
ENSMUSG00000021959	Lats2	1668.35	265.353	0.159051	2.79174e-31
ENSMUSG00000051043	Gprc5c	1360.15	216.593	0.159243	7.56439e-48
ENSMUSG00000049353	Rd3	253.356	40.3459	0.159246	9.89498e-20
ENSMUSG00000030340	Scnn1a	11826	1885.37	0.159426	6.10556e-87
ENSMUSG00000027160	Ccdc34	3477.89	554.875	0.159543	2.2874e-64
ENSMUSG00000021676	Iqgap2	8854.93	1415.26	0.159828	2.72552e-85
ENSMUSG00000002900	Lamb1	21559.7	3448.03	0.159929	1.67797e-42
ENSMUSG00000020160	Meis1	6368.94	1020.18	0.160181	5.66831e-33
ENSMUSG00000037086	1110059M19Rik	868.739	139.157	0.160183	1.34077e-20
ENSMUSG00000038886	Man2a2	6546.58	1049.11	0.160252	3.12598e-23
ENSMUSG00000048756	Foxo3	12581.8	2018.06	0.160395	1.14626e-86
ENSMUSG00000039103	Nexn	123.879	19.9089	0.160712	2.43582e-14
ENSMUSG00000035246	Pcyt1b	274.022	44.1297	0.161044	1.8155e-18
ENSMUSG00000028845	Tekt2	687.429	110.804	0.161186	1.82041e-27
ENSMUSG00000016495	5033414D02Rik	11448.2	1846.07	0.161254	3.47584e-86
ENSMUSG00000010660	Plcd1	3468.4	559.423	0.161291	4.89374e-63
ENSMUSG00000043154	Ppp2r3a	2173.19	350.628	0.161343	1.41388e-18
ENSMUSG00000027674	Pex5l	386.213	62.5876	0.162055	2.2732e-20
ENSMUSG00000042155	Klhl23	1054.47	170.946	0.162115	3.23723e-38
ENSMUSG00000041831	Sytl3	523.205	85.1626	0.162771	6.71268e-22
ENSMUSG00000047749	Zc3hav1l	742.264	121.068	0.163107	8.01333e-28
ENSMUSG00000061731	Ext1	2859.16	466.713	0.163234	4.30556e-63
ENSMUSG00000051678	Pcdhb6	12.0229	1.96371	0.163331	0.0048123
ENSMUSG00000031714	Gab1	6690.76	1093.19	0.163389	6.09033e-38
ENSMUSG00000054723	Vmac	3385.41	554.111	0.163676	4.0059e-62
ENSMUSG00000029279	Brdt	247.234	40.474	0.163707	5.90789e-10
ENSMUSG00000038630	Zkscan16	59.9635	9.81856	0.163742	8.38913e-08
ENSMUSG00000026004	1110028C15Rik	3596.52	589.858	0.164008	9.45654e-19
ENSMUSG00000013419	Zfp651	2176.64	357.042	0.164034	1.4638e-39
ENSMUSG00000052085	Dock8	7524.28	1236.22	0.164297	1.33497e-77
ENSMUSG00000032192	Gnb5	366.41	60.2394	0.164404	7.16893e-21
ENSMUSG00000040181	Fmo1	11793.3	1940.09	0.164507	9.56653e-64
ENSMUSG00000018417	Myo1b	8467.9	1396.44	0.164909	1.05834e-83
ENSMUSG00000038368	BC057079	2248.57	370.937	0.164965	3.22794e-54
ENSMUSG00000026193	Fn1	49909.4	8240.23	0.165104	1.84671e-49
ENSMUSG00000017491	Rarb	416.419	68.9248	0.165518	1.80434e-06
ENSMUSG00000029163	Emilin1	212.504	35.2853	0.166045	1.62242e-14
ENSMUSG00000042712	Wbp5	4536.45	753.948	0.166198	7.97758e-26
ENSMUSG00000025268	Maged2	5289.31	880.887	0.166541	2.07746e-73
ENSMUSG00000049288	Lix1l	2996.5	499.491	0.166691	1.14805e-58
ENSMUSG00000042046	Dstyk	4111.57	685.736	0.166782	4.51338e-70
ENSMUSG00000032946	Rasgrp2	162.836	27.1741	0.16688	1.64245e-09
ENSMUSG00000033767	D930015E06Rik	91438.8	15265.1	0.166943	3.10319e-61
ENSMUSG00000024534	Sncaip	709.936	118.705	0.167205	1.20018e-17
ENSMUSG00000052496	Pkdrej	19.2842	3.225	0.167236	0.000709659
ENSMUSG00000046794	Ppp1r3b	294.618	49.2877	0.167293	1.51291e-21
ENSMUSG00000045877	4933415A04Rik	246.818	41.3508	0.167535	7.44736e-16
ENSMUSG00000040329	Il7	12087.7	2028.7	0.167832	2.1621e-83
ENSMUSG00000035283	Adrb1	352.152	59.137	0.16793	4.8181e-16
ENSMUSG00000035107	Dcbld2	4533.86	762.516	0.168182	4.52141e-70
ENSMUSG00000064326	Siva1	1162.65	195.787	0.168397	1.5653e-34
ENSMUSG00000073681	1500002C15Rik	25.7087	4.34273	0.16892	0.0182605
ENSMUSG00000015501	Hivep2	3753.46	634.346	0.169003	4.56131e-24
ENSMUSG00000032057	4833427G06Rik	75.0368	12.7257	0.169593	0.0021796
ENSMUSG00000070526	Peg12	179.021	30.4299	0.169979	2.91738e-14
ENSMUSG00000028207	Asph	7338.9	1248.65	0.170141	3.22845e-79
ENSMUSG00000022747	St3gal6	5323.25	906.364	0.170265	7.87469e-72
ENSMUSG00000032719	Gm106	13.9449	2.37902	0.170602	0.00322394
ENSMUSG00000047953	Gp5	335.173	57.2861	0.170915	1.11042e-16
ENSMUSG00000069601	Ank3	26744.1	4575.29	0.171076	1.5076e-78
ENSMUSG00000031070	Mrgprf	108.12	18.504	0.171143	6.59949e-12
ENSMUSG00000079671	2610203C22Rik	98.8936	16.9402	0.171298	1.26756e-09
ENSMUSG00000063760	Rnf217	629.031	108.025	0.171732	7.71154e-26
ENSMUSG00000039059	Hrh3	57.0806	9.81856	0.172012	1.78354e-08
ENSMUSG00000029162	Khk	604.31	103.969	0.172046	4.51315e-25
ENSMUSG00000068606	Gm4841	2807.33	483.32	0.172164	0.00105656
ENSMUSG00000017737	Mmp9	19237	3315.73	0.172362	6.68257e-81
ENSMUSG00000021464	Ror2	220.213	37.9668	0.172409	3.11049e-15
ENSMUSG00000035293	G2e3	1128.13	194.526	0.172432	1.00395e-17
ENSMUSG00000009633	G0s2	479.794	82.799	0.172572	3.85602e-15
ENSMUSG00000044576	Fam59b	8.13587	1.40485	0.172673	0.0146289
ENSMUSG00000030782	Tgfb1i1	961.343	166.106	0.172785	1.30125e-43
ENSMUSG00000022112	Gpc5	239.643	41.4482	0.172958	9.72612e-15
ENSMUSG00000048677	Tpcn2	4037.76	699.482	0.173235	3.26094e-53
ENSMUSG00000022637	Cblb	2087.63	361.944	0.173375	7.66147e-15
ENSMUSG00000078867	Gm14418	348.87	60.5419	0.173537	3.52605e-18
ENSMUSG00000027624	Epb4.1l1	1906.84	331.498	0.173847	5.83333e-57
ENSMUSG00000051242	Pcdhb9	34.5518	6.01932	0.174212	0.00112989
ENSMUSG00000051579	Tceal8	2370.19	413.134	0.174304	5.67639e-56
ENSMUSG00000039133	9330171B17Rik	27.2905	4.75803	0.174348	0.000102348
ENSMUSG00000056214	Pard6g	10031.8	1749.72	0.174418	2.02134e-79
ENSMUSG00000020829	Slc46a1	825.333	143.997	0.174472	3.62378e-29
ENSMUSG00000079639	Rhox4a	294.737	51.4411	0.174532	2.56443e-16
ENSMUSG00000021322	Aoah	98.6182	17.2274	0.174687	5.13073e-10
ENSMUSG00000029201	Ugdh	8198.73	1432.32	0.1747	9.4653e-77
ENSMUSG00000020205	Phlda1	1530.15	268.193	0.175272	2.81844e-11
ENSMUSG00000028019	Pdgfc	505.648	88.6901	0.175399	1.25626e-22
ENSMUSG00000078875	Gm14419	19.1978	3.36856	0.175466	0.000671032
ENSMUSG00000025610	ORF63	1241.48	217.854	0.17548	2.27038e-26
ENSMUSG00000036459	Wtip	759.496	133.281	0.175487	1.29253e-18
ENSMUSG00000022018	1190002H23Rik	948.24	166.413	0.175497	2.25839e-30
ENSMUSG00000071342	Gm889	22.3777	3.92743	0.175506	0.00775235
ENSMUSG00000020395	Itk	693.853	121.837	0.175595	1.20376e-24
ENSMUSG00000031506	Ptpn7	514.988	90.4795	0.175693	1.09393e-09
ENSMUSG00000046897	Zfp740	9470.26	1665.47	0.175863	4.93111e-78
ENSMUSG00000024500	Ppp2r2b	115.441	20.3088	0.175924	2.73453e-12
ENSMUSG00000035606	Ky	799.706	141.187	0.176549	3.70967e-28
ENSMUSG00000002944	Cd36	106.192	18.7604	0.176664	1.54482e-05
ENSMUSG00000042258	Isl1	2777.72	492.461	0.17729	1.17383e-22
ENSMUSG00000038917	3930402G23Rik	50.586	8.97258	0.177373	6.77285e-07
ENSMUSG00000035472	Slc25a21	464.824	82.5426	0.177578	5.6344e-21
ENSMUSG00000020682	Mmp28	1084.36	192.741	0.177747	3.57314e-35
ENSMUSG00000005054	Cstb	57496.8	10247.7	0.178232	7.3082e-61
ENSMUSG00000038141	Tmem181a	742.258	132.646	0.178705	1.03694e-24
ENSMUSG00000014782	Plekhg4	36.0256	6.45	0.179039	4.30862e-06
ENSMUSG00000058620	Adra2b	175.896	31.5015	0.179092	1.41123e-13
ENSMUSG00000001520	Nrip2	378.239	67.8225	0.179311	3.17836e-20
ENSMUSG00000002732	Fkbp7	222.583	39.9306	0.179396	1.35596e-14
ENSMUSG00000062115	Rai1	4116.36	738.608	0.179432	4.82198e-46
ENSMUSG00000033860	Fgg	176.134	31.6143	0.17949	2.48317e-09
ENSMUSG00000044086	Lmod3	14.8411	2.66614	0.179646	0.00104402
ENSMUSG00000038195	Rilp	129.558	23.2774	0.179668	9.91528e-12
ENSMUSG00000037892	Pcdh18	2225.93	400.387	0.179874	4.78283e-21
ENSMUSG00000024026	Glo1	3743.63	673.405	0.17988	3.9386e-63
ENSMUSG00000034881	Tbxa2r	100.411	18.0733	0.179994	3.51042e-09
ENSMUSG00000021756	Il6st	10964	1983.97	0.180953	8.03885e-17
ENSMUSG00000048701	Ccdc6	15555.8	2815.04	0.180964	6.13073e-78
ENSMUSG00000043648	Pld6	21.611	3.91205	0.181021	0.0125589
ENSMUSG00000048520	Fbxl13	112.158	20.3088	0.181073	4.75745e-11
ENSMUSG00000041616	Nppa	10.0362	1.82015	0.181358	0.0148188
ENSMUSG00000059493	Nhs	1382.59	251.207	0.181692	1.84802e-08
ENSMUSG00000031861	Lpar2	451.381	82.0966	0.181879	1.04578e-20
ENSMUSG00000044461	Shisa2	11000.9	2002.55	0.182034	1.0945e-76
ENSMUSG00000028294	1700003M02Rik	26.0541	4.75803	0.182621	0.0133034
ENSMUSG00000037636	Slc25a43	217.865	39.8024	0.182693	7.09241e-14
ENSMUSG00000041120	Nbl1	2102.22	384.473	0.182888	7.11268e-29
ENSMUSG00000011263	Exoc3l2	38.9949	7.13705	0.183025	5.37383e-06
ENSMUSG00000049926	Olfr921	7.66617	1.40485	0.183253	0.0705954
ENSMUSG00000003534	Ddr1	14871.4	2731.71	0.183689	2.09964e-57
ENSMUSG00000020102	Slc16a7	445.178	81.7941	0.183733	8.23883e-21
ENSMUSG00000041577	Prelp	335.168	61.6596	0.183966	1.65505e-08
ENSMUSG00000028583	Pdpn	2122.5	391.112	0.18427	1.89533e-34
ENSMUSG00000090665	Gad1-ps	7.623	1.40485	0.184291	0.0308148
ENSMUSG00000041205	Map6d1	16.7198	3.08144	0.184299	0.00114318
ENSMUSG00000022831	Hcls1	473.472	87.3827	0.184557	2.72969e-14
ENSMUSG00000032925	Itgbl1	1604.88	296.429	0.184704	4.33827e-16
ENSMUSG00000035910	Dcdc2a	156.892	28.9943	0.184804	1.55071e-11
ENSMUSG00000031503	Col4a2	31278.8	5784.52	0.184934	1.7036e-42
ENSMUSG00000026012	Cd28	717.84	132.887	0.18512	6.20472e-23
ENSMUSG00000043008	Klhl6	272.127	50.4054	0.185227	2.27989e-15
ENSMUSG00000018537	Pcgf2	4406.65	817.284	0.185466	1.89404e-50
ENSMUSG00000019917	Sept10	2790.08	517.682	0.185544	1.20952e-28
ENSMUSG00000054863	Fam19a5	1039.11	192.9	0.18564	1.96137e-29
ENSMUSG00000042826	Fgf11	1365.21	254.083	0.186113	2.16296e-26
ENSMUSG00000029185	Fam114a1	2188.84	408.201	0.186492	1.6229e-48
ENSMUSG00000015202	Cnksr3	1868.04	348.772	0.186705	2.71876e-38
ENSMUSG00000024423	Impact	8390.46	1568.07	0.186887	1.99898e-71
ENSMUSG00000069184	Zfp72	71.9217	13.4435	0.186919	5.00088e-08
ENSMUSG00000062866	Phactr2	1756.83	328.545	0.187011	4.58427e-43
ENSMUSG00000030060	8430410A17Rik	1238.48	231.616	0.187016	3.03617e-34
ENSMUSG00000092279	1500011B03Rik	140.62	26.3281	0.187229	3.64677e-11
ENSMUSG00000053477	Tcf4	10314.2	1932.77	0.187388	8.27233e-53
ENSMUSG00000028931	Kcnab2	304.535	57.0964	0.187487	1.43284e-09
ENSMUSG00000074771	Ankrd5	9.69606	1.82015	0.187721	0.0184064
ENSMUSG00000026831	1700007K13Rik	71.6031	13.4435	0.18775	2.25114e-07
ENSMUSG00000076435	Acsf2	1453.72	272.966	0.187771	1.98138e-43
ENSMUSG00000032788	Pdxk	5635.17	1058.79	0.187889	4.23249e-67
ENSMUSG00000052957	Gas1	1095.88	206.051	0.188024	0.00013875
ENSMUSG00000034353	Ramp1	240.491	45.2321	0.188083	1.6469e-08
ENSMUSG00000071335	G630090E17Rik	406.793	76.7335	0.188631	2.91765e-17
ENSMUSG00000062157	Il28ra	503.868	95.1401	0.18882	0.0075247
ENSMUSG00000028358	Zfp618	2595.03	490.088	0.188856	6.79164e-32
ENSMUSG00000033420	Antxr1	2898.03	547.466	0.18891	7.57155e-09
ENSMUSG00000030725	Lipt2	82.3033	15.5508	0.188945	2.07945e-08
ENSMUSG00000014773	Dll1	2086.57	394.789	0.189205	1.18051e-33
ENSMUSG00000075588	Hoxb2	115.273	21.8418	0.189479	1.84914e-10
ENSMUSG00000090399	Nav1	213.373	40.474	0.189686	8.77529e-13
ENSMUSG00000034610	Zcchc11	4998.15	948.453	0.189761	3.97719e-22
ENSMUSG00000029868	Trpv6	39.8695	7.56773	0.189813	1.40817e-06
ENSMUSG00000049551	Fzd9	6.64044	1.26129	0.189941	0.0477402
ENSMUSG00000020844	Nxn	15364.6	2919.22	0.189997	8.92592e-56
ENSMUSG00000031165	Was	215.883	41.0637	0.190212	1.03558e-07
ENSMUSG00000074220	Zfp382	514.001	97.9652	0.190594	3.67429e-16
ENSMUSG00000030208	Emp1	562.276	107.42	0.191045	1.2686e-28
ENSMUSG00000033752	Mnd1	622.267	119.407	0.191891	5.22867e-22
ENSMUSG00000029178	Klf3	3369.55	647.369	0.192123	2.86231e-59
ENSMUSG00000001521	Tulp3	12194.1	2343.13	0.192154	1.20609e-72
ENSMUSG00000027985	Lef1	845.292	162.629	0.192394	1.3534e-25
ENSMUSG00000031354	Amelx	5.809	1.11773	0.192413	0.0988621
ENSMUSG00000021003	Galc	767.881	147.812	0.192493	2.61115e-27
ENSMUSG00000027863	Cd2	120.618	23.2467	0.19273	4.92173e-07
ENSMUSG00000020848	Doc2b	267.852	51.6667	0.192893	6.82106e-17
ENSMUSG00000030275	Etnk1	17931.4	3462.45	0.193095	2.59743e-22
ENSMUSG00000000555	Itga5	1143.39	220.838	0.193143	9.1297e-38
ENSMUSG00000038046	Rnmtl1	851.587	164.593	0.193278	3.88024e-25
ENSMUSG00000000085	Scmh1	4470.76	864.265	0.193315	2.17796e-60
ENSMUSG00000035392	Dennd1a	3091.71	598.353	0.193535	4.25923e-53
ENSMUSG00000028760	Eif4g3	13556.3	2624.91	0.19363	6.05513e-72
ENSMUSG00000029312	Klhl8	3241.55	628.235	0.193807	1.41566e-51
ENSMUSG00000037206	Islr	960.566	186.225	0.19387	6.90059e-23
ENSMUSG00000027932	Slc27a3	1748.86	339.112	0.193905	7.13067e-10
ENSMUSG00000042246	Tmc7	104.746	20.3242	0.194033	8.15204e-11
ENSMUSG00000039197	Adk	1924.58	374.572	0.194626	2.55434e-41
ENSMUSG00000059352	Gm10064	10.0794	1.96371	0.194824	0.0151294
ENSMUSG00000023044	Csad	3176.01	619.349	0.195009	1.54523e-55
ENSMUSG00000058447	Zfp82	267.733	52.2717	0.195238	2.93221e-12
ENSMUSG00000063704	Mapk15	786.025	153.59	0.195401	2.54315e-16
ENSMUSG00000034751	Mast4	22271.5	4357.62	0.195659	3.66986e-14
ENSMUSG00000058441	Panx2	15.0138	2.93788	0.195679	0.00531066
ENSMUSG00000054074	2810030E01Rik	623.384	122.155	0.195955	1.15552e-22
ENSMUSG00000055485	9830001H06Rik	3160.22	619.79	0.196122	1.93334e-37
ENSMUSG00000055639	Dach1	278.363	54.6353	0.196274	1.68994e-16
ENSMUSG00000020868	Xylt2	1169.29	229.508	0.19628	4.51711e-22
ENSMUSG00000037463	Fbxo27	112.536	22.129	0.196639	5.64241e-08
ENSMUSG00000042302	Ehbp1	1517.52	298.449	0.196669	8.94323e-23
ENSMUSG00000032411	Tfdp2	4892.5	962.209	0.19667	7.50514e-52
ENSMUSG00000047735	Samd9l	2562.81	504.813	0.196976	2.94849e-15
ENSMUSG00000021411	1300014I06Rik	553.8	109.271	0.197311	1.24148e-11
ENSMUSG00000001761	Smo	4985.07	983.897	0.197369	4.75455e-64
ENSMUSG00000026117	Zap70	295.984	58.4192	0.197373	1.73431e-15
ENSMUSG00000032415	Ube2cbp	186.768	36.8645	0.197381	1.1396e-12
ENSMUSG00000043298	C030030A07Rik	16.3365	3.225	0.197411	0.00118332
ENSMUSG00000069830	Nlrp1a	269.342	53.2151	0.197575	5.43854e-15
ENSMUSG00000039492	Ccdc27	7.11013	1.40485	0.197584	0.0320587
ENSMUSG00000055737	Ghr	1370.99	270.91	0.197602	2.57457e-40
ENSMUSG00000022146	Osmr	4752.38	940.445	0.197889	6.67034e-05
ENSMUSG00000060572	Mfap2	55.245	10.9363	0.19796	7.48434e-07
ENSMUSG00000052364	B630019K06Rik	243.617	48.3289	0.198381	1.41493e-14
ENSMUSG00000078896	Gm8923	14.7979	2.93788	0.198534	0.00768037
ENSMUSG00000020122	Egfr	10060.2	1997.39	0.198544	1.62445e-58
ENSMUSG00000061048	Cdh3	7997.8	1588.42	0.198607	1.08079e-55
ENSMUSG00000063388	BC023105	777.302	154.457	0.198709	0.000340706
ENSMUSG00000043592	Unc5cl	78.2435	15.5508	0.198748	1.20364e-08
ENSMUSG00000004885	Crabp2	944.192	187.712	0.198807	1.9055e-33
ENSMUSG00000031750	Il34	410.588	81.6813	0.198937	3.47218e-19
ENSMUSG00000033544	Angptl1	41.5539	8.27016	0.199022	3.77015e-06
ENSMUSG00000029859	Epha1	2381.11	474.168	0.199137	1.05022e-51
ENSMUSG00000050323	2310030N02Rik	605.584	120.653	0.199234	3.27346e-21
ENSMUSG00000042961	Egflam	5336.73	1063.98	0.19937	5.84399e-60
ENSMUSG00000041220	Elovl6	2746.36	547.774	0.199455	1.78667e-53
ENSMUSG00000079694	Gm14862	28.7859	5.74758	0.199666	0.000136906
ENSMUSG00000022449	Adamts20	389.787	77.8974	0.199846	6.68282e-13
ENSMUSG00000070323	Mmp27	19.6459	3.92743	0.19991	0.000867088
ENSMUSG00000063838	Cdc42ep5	348.136	69.6272	0.2	5.25124e-15
ENSMUSG00000091764	Zfp964	59.4722	11.9105	0.200269	9.45622e-07
ENSMUSG00000026249	Serpine2	2580.02	516.913	0.200353	2.07437e-49
ENSMUSG00000059713	Rcan3	1988.33	399.547	0.200945	6.34478e-44
ENSMUSG00000055202	Zfp811	45.9755	9.24432	0.201071	5.72931e-06
ENSMUSG00000070306	Ccdc153	38.9517	7.83948	0.201262	0.000122252
ENSMUSG00000078861	Zfp931	375.972	75.8055	0.201626	1.30912e-16
ENSMUSG00000028197	Col24a1	43.071	8.68546	0.201655	1.0396e-06
ENSMUSG00000061802	Armc4	11.0835	2.23546	0.201692	0.0346016
ENSMUSG00000057469	E2f6	1010.26	203.965	0.201894	1.06301e-28
ENSMUSG00000027438	Napb	287.227	58.0193	0.201998	1.02538e-15
ENSMUSG00000046798	Cldn12	1408.83	284.815	0.202164	1.50908e-15
ENSMUSG00000070713	Gm10282	37.3915	7.56773	0.202392	2.36789e-05
ENSMUSG00000042035	Igsf3	9886.76	2001.45	0.202438	1.02763e-57
ENSMUSG00000025489	Ifitm5	40.0585	8.1266	0.202868	0.000327619
ENSMUSG00000068270	Shroom4	588.978	119.489	0.202875	9.11454e-13
ENSMUSG00000032776	Mctp2	1263.15	256.703	0.203224	1.37121e-36
ENSMUSG00000024300	Myo1f	43.438	8.82902	0.203256	0.000291071
ENSMUSG00000003992	Ssbp2	1325.72	269.506	0.20329	3.59964e-35
ENSMUSG00000038522	AI317395	106.84	21.729	0.203378	3.93624e-09
ENSMUSG00000035863	Palm	702.043	142.797	0.203403	3.42768e-26
ENSMUSG00000020475	Pgam2	500.007	101.703	0.203403	3.01411e-19
ENSMUSG00000022120	Rnf219	1654.09	336.656	0.203529	2.58652e-36
ENSMUSG00000030491	Tdrd12	13.0918	2.66614	0.203649	0.00344799
ENSMUSG00000028776	Tinagl1	7063.84	1442.23	0.204171	1.86711e-24
ENSMUSG00000020638	Cmpk2	1258.71	257.082	0.204242	1.65975e-42
ENSMUSG00000024134	Six2	4930.59	1007.05	0.204246	3.62114e-53
ENSMUSG00000051674	Dcun1d4	1455.07	297.398	0.204387	6.24252e-35
ENSMUSG00000026018	Ica1l	49.3497	10.0903	0.204466	3.23836e-07
ENSMUSG00000049321	Zfp2	234.093	47.8828	0.204546	2.96099e-13
ENSMUSG00000036186	Fam69b	163.71	33.6241	0.205388	2.22188e-11
ENSMUSG00000055612	Cdca7	1549.28	318.296	0.205448	1.15136e-16
ENSMUSG00000024246	Thumpd2	550.906	113.213	0.205504	1.33887e-19
ENSMUSG00000038236	Hoxa7	8.15745	1.67659	0.205529	0.0431411
ENSMUSG00000032263	Bckdhb	3052.54	628.004	0.205732	1.87415e-49
ENSMUSG00000035245	A130022J15Rik	4398.01	905.544	0.205899	2.27448e-59
ENSMUSG00000037138	Aff3	242.764	49.9901	0.205921	2.5416e-16
ENSMUSG00000026043	Col3a1	484.14	99.7239	0.205982	4.37993e-09
ENSMUSG00000026189	Pecr	844.077	173.868	0.205986	4.04145e-24
ENSMUSG00000070436	Serpinh1	9567.56	1972.09	0.206122	2.433e-67
ENSMUSG00000031748	Gnao1	474.579	97.9037	0.206296	3.99244e-19
ENSMUSG00000019966	Kitl	10022.2	2068.8	0.206421	3.58565e-64
ENSMUSG00000000794	Kcnn3	1955.8	404.448	0.206794	7.04448e-38
ENSMUSG00000025260	Hsd17b10	3199.97	661.992	0.206875	2.51519e-51
ENSMUSG00000031451	Gas6	77552.6	16064	0.207137	4.48791e-47
ENSMUSG00000023034	Nr4a1	3542.1	734.957	0.207492	0.065397
ENSMUSG00000044716	Dok7	25.0068	5.18871	0.207492	9.19762e-05
ENSMUSG00000048402	Gli2	743.926	154.421	0.207575	2.48309e-23
ENSMUSG00000050397	Foxl2	19.6027	4.07099	0.207674	0.00423528
ENSMUSG00000058736	Gm10047	13.4536	2.79432	0.207701	0.0105454
ENSMUSG00000028637	Ccdc30	479.503	99.5957	0.207706	3.80269e-20
ENSMUSG00000036545	Adamts2	5565.44	1156.83	0.20786	5.38792e-57
ENSMUSG00000071073	Gm88	353.745	73.5393	0.207888	4.77548e-15
ENSMUSG00000078153	Psme2b-ps	40.3823	8.39834	0.207971	0.000108637
ENSMUSG00000024905	Mtl5	23.5546	4.90159	0.208095	0.0578876
ENSMUSG00000090100	Ttbk2	3148.63	655.609	0.20822	2.97378e-52
ENSMUSG00000048490	Nrip1	5407.3	1126.43	0.208316	3.9767e-45
ENSMUSG00000026411	Tmem9	2170.95	452.423	0.208399	2.92327e-44
ENSMUSG00000038507	Parp12	2830.97	591.247	0.20885	1.96887e-33
ENSMUSG00000034485	Uaca	2812.11	588.499	0.209273	1.81088e-50
ENSMUSG00000053353	2310001K24Rik	8.69191	1.82015	0.209408	0.0377117
ENSMUSG00000041216	Clvs1	416.133	87.1417	0.209408	9.71532e-19
ENSMUSG00000023008	Fmnl3	4933.3	1034.47	0.209692	7.64872e-57
ENSMUSG00000032135	Mcam	772.539	162.065	0.209783	1.56349e-13
ENSMUSG00000043300	B3galnt1	1271.52	266.886	0.209895	7.3499e-31
ENSMUSG00000051236	Msrb3	2951.11	620.313	0.210197	4.13913e-51
ENSMUSG00000043183	4732471D19Rik	679.827	142.926	0.210238	7.38255e-23
ENSMUSG00000050989	Sepn1	1894.12	398.408	0.21034	2.24921e-43
ENSMUSG00000000325	Arvcf	3849.69	811.419	0.210775	6.73552e-53
ENSMUSG00000058297	Spock2	32165.1	6784.67	0.210933	2.43407e-61
ENSMUSG00000024268	Celf4	311.846	65.8126	0.211042	4.06788e-15
ENSMUSG00000072115	Ang	259.16	54.7635	0.211312	1.66916e-15
ENSMUSG00000021286	Zfyve21	4341.19	917.798	0.211416	1.15138e-51
ENSMUSG00000053113	Socs3	18510.5	3920.18	0.211781	0.00111487
ENSMUSG00000071068	Treml2	82.0063	17.3709	0.211824	6.34726e-06
ENSMUSG00000054889	Dsp	147537	31273.8	0.211973	4.76263e-29
ENSMUSG00000028545	Bend5	582.273	123.447	0.212009	1.11163e-20
ENSMUSG00000033446	Lpar6	882.981	187.204	0.212014	2.86367e-25
ENSMUSG00000046709	Mapk10	129.709	27.574	0.212583	6.52409e-10
ENSMUSG00000038836	Agbl3	482.435	102.58	0.212629	2.032e-18
ENSMUSG00000078887	Gm6710	51.4011	10.9363	0.212764	5.19001e-06
ENSMUSG00000022382	Wnt7b	251.925	53.615	0.212821	4.37281e-15
ENSMUSG00000053644	Aldh7a1	6477.1	1381.44	0.21328	4.80668e-60
ENSMUSG00000038013	Wipf2	7267.02	1551.5	0.213498	2.14486e-61
ENSMUSG00000056121	Fez2	1200.86	256.395	0.21351	3.52768e-32
ENSMUSG00000078878	Gm14305	50.5481	10.7927	0.213514	1.04198e-05
ENSMUSG00000020175	Rab36	601.287	128.605	0.213883	1.29802e-21
ENSMUSG00000031425	Plp1	359.484	76.9232	0.213982	1.0132e-18
ENSMUSG00000040213	Ccbl2	856.954	183.61	0.214259	2.58238e-24
ENSMUSG00000050530	Fam171a1	1971.46	422.906	0.214514	1.07596e-44
ENSMUSG00000046480	Scn4b	6207.62	1334.57	0.214988	2.11112e-34
ENSMUSG00000032184	Lysmd2	470.384	101.159	0.215057	4.1297e-19
ENSMUSG00000043421	Hilpda	479.309	103.123	0.21515	4.10308e-09
ENSMUSG00000036995	Asap3	1799.84	388.703	0.215965	1.58092e-11
ENSMUSG00000044594	Serpinb3a	16.1638	3.49675	0.216332	0.00157749
ENSMUSG00000042116	Vwa1	2168.7	470.394	0.216901	2.92317e-48
ENSMUSG00000073652	Apol7d	453.168	98.4472	0.217242	2.502e-16
ENSMUSG00000016179	Camk1g	16.7414	3.64031	0.217443	0.00193806
ENSMUSG00000020284	1810043G02Rik	1658.3	361	0.217692	5.42306e-17
ENSMUSG00000024677	Ms4a6b	41.7482	9.10076	0.217992	1.74853e-05
ENSMUSG00000038884	A230050P20Rik	3446.99	751.554	0.218032	1.55645e-17
ENSMUSG00000048478	4732415M23Rik	30.2382	6.59356	0.218054	9.51266e-05
ENSMUSG00000062372	Otof	120.785	26.3435	0.218102	5.74365e-13
ENSMUSG00000080727	C920021L13Rik	257.448	56.1684	0.218173	1.38136e-12
ENSMUSG00000036580	Spg20	3173.28	693.683	0.218601	5.32058e-48
ENSMUSG00000037032	Apbb1	1528.3	334.226	0.218692	7.22704e-36
ENSMUSG00000029103	Lrpap1	9530.26	2084.29	0.218702	5.22487e-62
ENSMUSG00000058756	Thra	2034.27	445.127	0.218815	1.0747e-38
ENSMUSG00000045071	E130308A19Rik	1044.88	229.698	0.219833	2.22297e-28
ENSMUSG00000033585	Ndn	576.048	126.657	0.219872	4.1399e-22
ENSMUSG00000058761	Rnf169	2621.47	576.845	0.220046	6.52667e-45
ENSMUSG00000021193	Pitrm1	11494.2	2530.7	0.220172	3.31732e-62
ENSMUSG00000031227	Magee1	595.774	131.271	0.220338	3.44877e-16
ENSMUSG00000028469	Npr2	342.305	75.5338	0.220662	7.8949e-05
ENSMUSG00000045284	Dcaf12l1	1356.84	299.489	0.220726	1.67445e-32
ENSMUSG00000091454	Dynlt1b	216.818	47.8982	0.220915	2.67613e-12
ENSMUSG00000037410	Tbc1d2b	15786	3487.6	0.22093	3.61713e-62
ENSMUSG00000002997	Prkar2b	88.7063	19.6064	0.221026	2.59438e-09
ENSMUSG00000057143	Trim12c	1904.49	421.214	0.221169	3.05502e-27
ENSMUSG00000039616	Mocos	2181.83	482.663	0.22122	1.46194e-19
ENSMUSG00000017697	Ada	2728.41	604.132	0.221423	2.18227e-43
ENSMUSG00000079103	Tgm7	272.527	60.3675	0.22151	4.30337e-16
ENSMUSG00000021108	Prkch	907.124	201.473	0.222101	8.60977e-28
ENSMUSG00000039477	Tnrc18	9124.58	2026.85	0.222131	1.68254e-59
ENSMUSG00000024669	Cd5	215.392	47.9136	0.222448	3.81941e-08
ENSMUSG00000041596	Vmn1r90	20.1588	4.48629	0.222548	0.00176713
ENSMUSG00000071856	Mcc	5282.15	1175.81	0.2226	5.21297e-31
ENSMUSG00000029276	Glmn	737.832	164.291	0.222667	1.37851e-15
ENSMUSG00000062661	Ncs1	1740.06	387.728	0.222824	3.15931e-37
ENSMUSG00000001911	Nfix	16499.3	3682.62	0.223199	1.32341e-61
ENSMUSG00000025422	Agap2	119.868	26.7588	0.223237	5.36677e-10
ENSMUSG00000026814	Eng	110.414	24.6515	0.223264	2.66072e-05
ENSMUSG00000006369	Fbln1	2180.74	487.191	0.223406	5.8566e-45
ENSMUSG00000054412	Gm4793	144.831	32.3782	0.223558	1.45244e-08
ENSMUSG00000030966	Trim21	2519.02	563.663	0.223762	8.87164e-43
ENSMUSG00000091526	Gm6494	31.3071	7.00887	0.223875	0.000300158
ENSMUSG00000045275	Lca5l	36.2794	8.1266	0.224	0.000248727
ENSMUSG00000044707	Ccnjl	1613.25	361.718	0.224217	2.87097e-33
ENSMUSG00000029249	Rest	3004.86	674.143	0.224351	2.51647e-48
ENSMUSG00000068245	D14Ertd668e	610.071	136.973	0.22452	8.46178e-08
ENSMUSG00000035215	Lsm7	91.1195	20.4677	0.224625	3.47435e-08
ENSMUSG00000026826	Nr4a2	333.122	74.8313	0.224636	6.40452e-08
ENSMUSG00000059077	Pth	75.9488	17.0684	0.224736	0.0777536
ENSMUSG00000049916	2610318N02Rik	103.887	23.4056	0.225298	1.54676e-08
ENSMUSG00000040729	AK129341	2064.52	465.375	0.225416	2.27487e-24
ENSMUSG00000074264	Amy1	114.906	25.9128	0.225513	4.50944e-07
ENSMUSG00000011008	Mcoln2	18.6202	4.19917	0.225517	0.00133244
ENSMUSG00000037325	Bbs7	2010.19	455.156	0.226424	4.19936e-35
ENSMUSG00000023043	Krt18	215096	48744.4	0.226617	5.52804e-25
ENSMUSG00000003227	Edar	1277.19	290.081	0.227124	7.4512e-30
ENSMUSG00000002797	Ggct	330.677	75.1185	0.227166	1.32447e-14
ENSMUSG00000029426	Scarb2	7722.72	1759.35	0.227815	2.88953e-58
ENSMUSG00000066861	Oas1g	244.081	55.6095	0.227832	0.000845385
ENSMUSG00000024639	Gnaq	6398.16	1458.03	0.227883	9.71199e-57
ENSMUSG00000069729	Arid1b	19161.9	4368.02	0.227953	2.2283e-59
ENSMUSG00000030309	Caprin2	1146.1	261.282	0.227975	7.38043e-30
ENSMUSG00000022186	Oxct1	8543.93	1950.57	0.228299	1.89446e-58
ENSMUSG00000030067	Foxp1	2727.18	623.964	0.228794	1.5058e-44
ENSMUSG00000037643	Prkci	9554	2189.46	0.229167	1.04531e-58
ENSMUSG00000034109	Golim4	4617.81	1059.01	0.229332	7.44346e-54
ENSMUSG00000048503	Tmem136	217.854	50.0209	0.229607	3.26494e-09
ENSMUSG00000028518	Prkaa2	2693.84	619.703	0.230044	3.98975e-43
ENSMUSG00000030522	Mtmr10	2655.25	611.274	0.230213	9.73485e-43
ENSMUSG00000038271	Iffo1	1242.44	286.061	0.230242	1.56483e-29
ENSMUSG00000025815	Dhtkd1	387.692	89.3772	0.230536	3.28745e-15
ENSMUSG00000001473	Tubb6	9368.42	2163.36	0.23092	1.04514e-38
ENSMUSG00000020601	Trib2	1911.4	442.379	0.231443	1.18116e-38
ENSMUSG00000038543	BC028528	561.05	129.851	0.231443	3.26656e-17
ENSMUSG00000092192	Dyx1c1	177.288	41.0483	0.231534	1.91383e-10
ENSMUSG00000024781	Lipa	2014.1	466.687	0.23171	1.0694e-38
ENSMUSG00000043614	Vps37d	422.708	98.1088	0.232096	7.78193e-15
ENSMUSG00000047787	Flrt1	745.746	173.104	0.232122	2.78172e-23
ENSMUSG00000005802	Slc30a4	2671	620.277	0.232227	3.53135e-45
ENSMUSG00000031749	St3gal2	2286.83	531.213	0.232292	5.8997e-21
ENSMUSG00000051934	Spats2	6815.94	1584.33	0.232445	1.15638e-55
ENSMUSG00000032563	Mrpl3	6397.11	1488.1	0.23262	3.79091e-54
ENSMUSG00000047227	Gm527	254.015	59.1063	0.232688	3.43439e-12
ENSMUSG00000058831	Opn1sw	31.2855	7.28061	0.232715	0.000386478
ENSMUSG00000019951	Uhrf1bp1l	4104.14	957.359	0.233267	8.2335e-50
ENSMUSG00000018672	Copz2	3893.59	909.287	0.233534	2.84863e-48
ENSMUSG00000029860	Zyx	5353.4	1251.68	0.233809	4.41497e-55
ENSMUSG00000017412	Cacnb4	107.693	25.2104	0.234094	7.03525e-08
ENSMUSG00000066026	Dhrs3	4508.81	1055.57	0.234113	1.00838e-26
ENSMUSG00000039497	Dse	1346.83	315.456	0.23422	2.54779e-32
ENSMUSG00000069227	Gprin1	963.853	225.837	0.234307	2.10116e-24
ENSMUSG00000054728	Phactr1	710.211	166.475	0.234402	1.1981e-21
ENSMUSG00000046805	Mpeg1	649.87	152.539	0.234722	1.7215e-10
ENSMUSG00000067006	Serpinb5	414.006	97.2987	0.235018	5.19949e-20
ENSMUSG00000023885	Thbs2	7092.34	1667.27	0.23508	2.04773e-18
ENSMUSG00000030249	Abcc9	78.1245	18.3758	0.235212	1.86883e-09
ENSMUSG00000033316	Galnt9	317.822	74.9595	0.235854	7.068e-14
ENSMUSG00000022912	Pros1	3926.51	927.775	0.236285	7.40484e-39
ENSMUSG00000024098	Twsg1	15212.2	3595.24	0.236339	5.91064e-56
ENSMUSG00000062421	Arf2	2671.3	631.721	0.236484	3.29612e-41
ENSMUSG00000023017	Accn2	514.092	121.612	0.236556	7.83378e-20
ENSMUSG00000005628	Tmod4	244.983	58.0039	0.236767	2.05593e-11
ENSMUSG00000024513	Mbd2	4852.32	1149.32	0.23686	8.98514e-52
ENSMUSG00000040253	Gbp7	2388.13	566.18	0.237081	4.18007e-06
ENSMUSG00000031329	Tsx	22.4209	5.3169	0.23714	0.00292793
ENSMUSG00000028035	Dnajb4	1890.58	448.911	0.237446	2.72188e-08
ENSMUSG00000073576	9630014M24Rik	22.9769	5.46046	0.23765	0.00198431
ENSMUSG00000025025	Mxi1	2067.36	491.318	0.237655	6.96776e-39
ENSMUSG00000044092	C130050O18Rik	19.4732	4.62985	0.237755	0.0090772
ENSMUSG00000028488	Sh3gl2	186.018	44.2425	0.23784	1.34344e-11
ENSMUSG00000021379	Id4	1072.38	255.401	0.238162	4.16127e-30
ENSMUSG00000022432	Smc1b	135.94	32.3782	0.238181	6.25122e-10
ENSMUSG00000002699	Lcp2	471.502	112.306	0.238188	4.81316e-18
ENSMUSG00000022894	Adamts5	18.2153	4.34273	0.238412	0.00206162
ENSMUSG00000062542	Syt9	58.2575	13.8895	0.238417	1.65313e-06
ENSMUSG00000031112	2610018G03Rik	4777.8	1140.6	0.23873	2.37458e-27
ENSMUSG00000030606	Hapln3	13.4968	3.225	0.238946	0.00566188
ENSMUSG00000029428	Stx2	747.721	178.785	0.239107	1.51583e-20
ENSMUSG00000069919	Hba-a1	8.79986	2.10727	0.239467	0.0479788
ENSMUSG00000054404	Slfn5	654.858	156.913	0.239613	4.36932e-10
ENSMUSG00000025083	Afap1l2	5638.05	1353.45	0.240056	1.03529e-16
ENSMUSG00000028245	Nsmaf	12061.5	2898.99	0.240351	1.28554e-45
ENSMUSG00000027340	Slc23a2	2608.99	628.071	0.240734	1.53582e-42
ENSMUSG00000035776	Cd99l2	2433.15	586.284	0.240957	4.64416e-40
ENSMUSG00000024424	Ttc39c	1678.67	404.592	0.241019	3.45067e-34
ENSMUSG00000040249	Lrp1	5419.25	1310.01	0.241732	2.279e-06
ENSMUSG00000048481	Mypop	924.539	223.504	0.241747	8.99315e-11
ENSMUSG00000087408	Lass1	61.4589	14.8637	0.241848	2.3379e-06
ENSMUSG00000024942	Capn1	16833.2	4076.93	0.242196	8.36927e-55
ENSMUSG00000061758	Akr1b10	594.679	144.156	0.24241	6.7239e-20
ENSMUSG00000078380	Gm6096	11.5101	2.79432	0.242772	0.0329905
ENSMUSG00000020181	Nav3	1058.63	257.052	0.242816	5.32079e-21
ENSMUSG00000049092	Gpr137c	64.5093	15.6943	0.243288	5.07151e-06
ENSMUSG00000092443	CT009512.1	131.847	32.0911	0.243396	1.98057e-08
ENSMUSG00000051652	Lrrc3	980.179	238.64	0.243466	3.14535e-22
ENSMUSG00000039903	4931408A02Rik	180.895	44.099	0.243783	2.35359e-08
ENSMUSG00000024525	Impa2	692.52	169.269	0.244425	2.85644e-18
ENSMUSG00000028218	Fam92a	2763.71	675.574	0.244445	8.43303e-42
ENSMUSG00000046179	E2f8	1248.2	305.186	0.244501	2.29633e-26
ENSMUSG00000029207	Apbb2	1820.69	445.24	0.244545	3.69857e-34
ENSMUSG00000078905	Gm14393	11.4669	2.8097	0.245027	0.0159494
ENSMUSG00000084883	Ccdc85c	703.117	172.397	0.245189	6.26974e-19
ENSMUSG00000078349	AW011738	658.934	161.783	0.245523	1.44734e-12
ENSMUSG00000037251	4930444A02Rik	1394.81	342.517	0.245565	1.14051e-27
ENSMUSG00000023927	Satb1	5518.06	1355.89	0.245719	3.29062e-21
ENSMUSG00000060882	Kcnd2	9.09684	2.23546	0.24574	0.0502403
ENSMUSG00000031910	Has3	3069.7	755.835	0.246224	2.59769e-42
ENSMUSG00000074994	Qser1	5068.02	1248.26	0.246301	7.28185e-29
ENSMUSG00000030336	Cd27	397.107	97.8422	0.246387	3.46148e-06
ENSMUSG00000033278	Ptprm	421.888	103.969	0.246438	1.47773e-14
ENSMUSG00000079608	Stard6	71.0686	17.5145	0.246445	3.26818e-06
ENSMUSG00000029672	Fam3c	2035.08	501.854	0.246602	7.03128e-35
ENSMUSG00000022383	Ppara	103.229	25.5129	0.247149	3.30738e-08
ENSMUSG00000026000	Lancl1	9538.73	2359.33	0.247343	3.05658e-53
ENSMUSG00000027692	Tnik	1771.09	438.231	0.247437	2.61124e-14
ENSMUSG00000023235	Ccl25	104276	25815.2	0.247567	4.31374e-17
ENSMUSG00000024070	Prkd3	3192.39	791.161	0.247827	5.6469e-42
ENSMUSG00000029455	Aldh2	6248.62	1551.24	0.248254	1.24317e-51
ENSMUSG00000042215	Bag2	194.672	48.3289	0.248258	6.56989e-11
ENSMUSG00000071771	Rhox4b	39.4861	9.80319	0.248269	0.000378826
ENSMUSG00000030319	Cand2	423.723	105.215	0.248311	3.40388e-16
ENSMUSG00000055254	Ntrk2	505.671	125.652	0.248486	9.93501e-15
ENSMUSG00000060935	AI597468	2816.22	700.072	0.248586	5.26435e-40
ENSMUSG00000071547	Nt5dc2	1147.75	285.374	0.248638	2.42625e-23
ENSMUSG00000033565	Rbfox2	10814.1	2689.14	0.24867	1.25067e-53
ENSMUSG00000055435	Maf	7395.4	1839.18	0.248692	9.96542e-51
ENSMUSG00000029705	Cux1	6733.62	1678.67	0.249296	1.80682e-51
ENSMUSG00000025742	Prps2	1878.62	468.374	0.249318	6.36085e-36
ENSMUSG00000001995	Sipa1l2	8463.55	2110.17	0.249325	9.457e-52
ENSMUSG00000021493	Pdlim7	2713.02	677.256	0.249632	2.89675e-40
ENSMUSG00000032194	Kank2	4650.82	1161.08	0.249651	7.33088e-33
ENSMUSG00000031239	Itm2a	239.049	59.6805	0.249658	8.56034e-11
ENSMUSG00000072875	Gpr27	260.903	65.2025	0.24991	1.55309e-06
ENSMUSG00000029366	Dck	1890.72	472.747	0.250036	1.11517e-32
ENSMUSG00000042797	Aqp11	296.772	74.2417	0.250164	3.10531e-12
ENSMUSG00000027744	Stoml3	50.3106	12.6129	0.2507	4.70636e-06
ENSMUSG00000033460	Armcx1	1455.36	365.922	0.251431	3.45524e-32
ENSMUSG00000042426	Dhx29	8153.93	2051.24	0.251565	2.45026e-42
ENSMUSG00000092035	Peg10	133.591	33.6241	0.251694	1.24709e-08
ENSMUSG00000028576	Ift74	1924.94	485.186	0.252052	5.38112e-34
ENSMUSG00000036528	Ppfibp2	340.556	85.8958	0.252222	4.43532e-18
ENSMUSG00000022286	Grhl2	4186.37	1056.33	0.252326	1.77559e-36
ENSMUSG00000027956	Tmem144	183.713	46.3652	0.252379	5.0382e-10
ENSMUSG00000073008	Gpr174	39.3187	9.94675	0.252978	0.0674997
ENSMUSG00000028173	Wls	10576.2	2676.38	0.253058	8.48819e-52
ENSMUSG00000024535	Snx24	236.075	59.7779	0.253216	2.09402e-10
ENSMUSG00000036721	Zscan12	1121.04	283.887	0.253235	2.12587e-23
ENSMUSG00000049281	Scn3b	755.463	191.618	0.253644	1.9357e-31
ENSMUSG00000089798	1700028K03Rik	193.739	49.1441	0.253662	0.00292914
ENSMUSG00000000365	Rnf17	27.6307	7.00887	0.253663	0.000302557
ENSMUSG00000030161	Gabarapl1	3648.89	925.658	0.253682	2.58513e-45
ENSMUSG00000040841	Six5	908.911	230.575	0.253683	3.71146e-19
ENSMUSG00000078862	Gm14326	311.263	78.9998	0.253804	4.00768e-12
ENSMUSG00000020605	Hs1bp3	1409.51	358.462	0.254318	2.76632e-25
ENSMUSG00000050222	Il17d	140.431	35.7468	0.25455	1.17763e-08
ENSMUSG00000050382	Kif7	241.997	61.6596	0.254795	2.38381e-05
ENSMUSG00000034532	Fbxo16	41.7267	10.6338	0.254844	7.98225e-05
ENSMUSG00000020585	Laptm4a	23643.1	6030.94	0.255083	4.06045e-47
ENSMUSG00000052560	Cpne8	1369.95	349.526	0.255138	1.39653e-15
ENSMUSG00000046562	Unc119b	2198.14	560.991	0.255212	5.12652e-30
ENSMUSG00000059327	Eda	518.114	132.23	0.255214	1.99431e-16
ENSMUSG00000053916	Nanp	79.5662	20.3088	0.255244	2.0226e-06
ENSMUSG00000039063	Echdc3	313.185	79.9585	0.255308	2.00607e-12
ENSMUSG00000001802	Lrp3	221.083	56.4555	0.255359	3.96066e-11
ENSMUSG00000034687	Fras1	2542.54	649.738	0.255547	7.81607e-16
ENSMUSG00000078906	Gm14444	23.533	6.01932	0.255782	0.00267871
ENSMUSG00000039345	Mettl22	356.849	91.3409	0.255965	4.06274e-10
ENSMUSG00000036395	Glb1l2	198.959	50.9489	0.256078	7.77271e-12
ENSMUSG00000032292	Nr2e3	7.66617	1.96371	0.256153	0.0534822
ENSMUSG00000016496	Cd274	29498.2	7557.13	0.25619	0.0944779
ENSMUSG00000048126	Col6a3	125.19	32.0757	0.256215	2.9425e-09
ENSMUSG00000016534	Lamp2	65163.4	16712.4	0.256469	1.196e-36
ENSMUSG00000044548	Dact1	1986.31	509.468	0.25649	1.23162e-32
ENSMUSG00000029267	Mtf2	4049.99	1040.32	0.25687	4.46849e-31
ENSMUSG00000062175	Tgif2	2801.67	719.714	0.256888	7.76156e-29
ENSMUSG00000056656	Apol8	20.7528	5.33227	0.256943	0.0276543
ENSMUSG00000034730	Bai1	2465.55	633.946	0.257122	1.92473e-27
ENSMUSG00000039683	Sdk1	2570.94	661.054	0.257125	5.98794e-37
ENSMUSG00000041548	Hspb8	6072.58	1561.58	0.257153	2.05373e-48
ENSMUSG00000037490	Slc2a12	304.919	78.4255	0.257201	2.25682e-12
ENSMUSG00000035799	Twist1	31.5825	8.1266	0.257313	0.000324032
ENSMUSG00000024944	Arl2	1305.18	336.159	0.257557	1.30681e-25
ENSMUSG00000050092	Sprr2b	7.06695	1.82015	0.257558	0.0771755
ENSMUSG00000051074	4930579K19Rik	33.6771	8.68546	0.257904	0.000449488
ENSMUSG00000037712	Fermt2	5574.55	1437.93	0.257944	5.58758e-33
ENSMUSG00000056215	Lrguk	68.9524	17.7862	0.257949	1.24816e-06
ENSMUSG00000027739	Rab33b	2313.96	596.933	0.257971	2.23635e-34
ENSMUSG00000078903	Gm14391	20.5853	5.3169	0.258286	0.0641736
ENSMUSG00000036615	Rfxap	1516.1	392.245	0.25872	1.40129e-28
ENSMUSG00000015980	Lrrc27	134.277	34.7418	0.258733	6.2938e-09
ENSMUSG00000026778	Prkcq	3273.36	847.443	0.25889	9.59717e-39
ENSMUSG00000055733	Nap1l3	117.384	30.3991	0.258971	6.44049e-08
ENSMUSG00000054008	Ndst1	4466.02	1157.98	0.259286	8.77239e-46
ENSMUSG00000044313	Mab21l3	594.22	154.246	0.259578	6.49821e-17
ENSMUSG00000061577	Gpr114	9.71765	2.52258	0.259587	0.0461877
ENSMUSG00000040345	Arhgap9	197.404	51.2514	0.259627	3.10244e-10
ENSMUSG00000017466	Timp2	2071.02	537.873	0.259715	1.88822e-40
ENSMUSG00000026736	4930426L09Rik	40.3823	10.4902	0.259773	0.000270589
ENSMUSG00000055775	Myh8	12.9623	3.36856	0.259874	0.00679939
ENSMUSG00000025265	Fgd1	1615.17	419.881	0.259961	1.5662e-30
ENSMUSG00000027848	Olfml3	45.7648	11.9105	0.260254	3.30321e-05
ENSMUSG00000025762	Larp1b	251.083	65.4127	0.260522	1.01092e-09
ENSMUSG00000054894	Atp5s	424.36	110.691	0.260842	1.08194e-14
ENSMUSG00000091428	Gm17507	427.741	111.711	0.261166	0.0407767
ENSMUSG00000046991	Wdr27	30.5568	7.98304	0.261253	0.000300963
ENSMUSG00000031519	Asb5	32.1385	8.39834	0.261317	0.000389515
ENSMUSG00000079076	Gm3086	13.9233	3.64031	0.261455	0.0248591
ENSMUSG00000021318	Gli3	4497.1	1175.86	0.261472	7.45471e-10
ENSMUSG00000037306	Man1c1	682.057	178.401	0.261562	9.94806e-20
ENSMUSG00000024079	Eif2ak2	4136.02	1082.33	0.261685	2.93065e-15
ENSMUSG00000064125	BC068157	163.003	42.7249	0.262111	1.64517e-09
ENSMUSG00000046269	Usp27x	463.706	121.612	0.26226	7.15869e-15
ENSMUSG00000028289	Epha7	456.936	120.048	0.262724	5.5154e-17
ENSMUSG00000056679	Gpr173	260.893	68.6531	0.263147	1.42859e-09
ENSMUSG00000071722	Spin4	144.675	38.095	0.263315	2.4533e-08
ENSMUSG00000036782	Klhl13	1623.58	427.628	0.263386	2.03026e-20
ENSMUSG00000033152	Podxl2	93.6027	24.6669	0.263528	4.74848e-06
ENSMUSG00000022372	Sla	1032.93	272.285	0.263603	2.11645e-13
ENSMUSG00000026880	Stom	812.819	214.47	0.26386	1.84956e-22
ENSMUSG00000063145	Bbs5	793.875	209.569	0.263982	2.55521e-19
ENSMUSG00000034640	Tiparp	1613.94	426.213	0.264083	0.000244637
ENSMUSG00000091043	Glyatl3	9.54494	2.52258	0.264284	0.0323075
ENSMUSG00000037656	Slc20a2	2579.28	682.029	0.264426	4.4918e-37
ENSMUSG00000067714	Lpar5	45.5274	12.0386	0.264427	8.13563e-05
ENSMUSG00000022253	1110020G09Rik	2023.66	535.576	0.264657	2.40948e-32
ENSMUSG00000051036	Ttc24	382.401	101.334	0.264993	3.72096e-06
ENSMUSG00000033233	Trim45	297.453	78.8869	0.265208	5.0513e-12
ENSMUSG00000001029	Icam2	115.878	30.799	0.265789	0.000816213
ENSMUSG00000035364	4930524J08Rik	37.926	10.0903	0.266053	0.000221991
ENSMUSG00000062275	Fbxw24	15.7805	4.19917	0.266099	0.0303916
ENSMUSG00000025510	Cd151	5980.22	1591.57	0.266138	2.4126e-17
ENSMUSG00000057531	Dtnbp1	2451.06	652.522	0.26622	1.71518e-35
ENSMUSG00000020787	P2rx1	109.383	29.1378	0.266383	8.94633e-06
ENSMUSG00000036249	Rbm43	2547.71	679.24	0.266608	1.93751e-35
ENSMUSG00000055357	4933400A11Rik	9.99304	2.66614	0.266799	0.077961
ENSMUSG00000043635	Adamts3	263.257	70.3143	0.267093	1.6063e-08
ENSMUSG00000028521	Slc35d1	2145.45	573.271	0.267203	6.58654e-09
ENSMUSG00000024866	Acy3	28.8507	7.71129	0.267283	0.00027204
ENSMUSG00000044528	Tram1l1	45.5705	12.1822	0.267326	9.22883e-05
ENSMUSG00000005583	Mef2c	104.811	28.0355	0.267487	1.09981e-08
ENSMUSG00000003559	As3mt	2047.84	548.62	0.267902	6.13024e-31
ENSMUSG00000030607	Acan	13.0487	3.49675	0.267977	0.0259967
ENSMUSG00000061104	Gm10094	11.4885	3.08144	0.26822	0.0326464
ENSMUSG00000000244	Tspan32	30.8158	8.27016	0.268374	0.000173813
ENSMUSG00000038648	Creb3l2	13461.9	3613.62	0.268433	2.88766e-48
ENSMUSG00000028266	Lmo4	2354.07	631.926	0.26844	4.22953e-37
ENSMUSG00000050295	Foxc1	1279.71	343.614	0.268509	1.39164e-27
ENSMUSG00000022307	Oxr1	5486.92	1474.59	0.268747	2.81532e-45
ENSMUSG00000028133	Rwdd3	160.007	43.012	0.268813	7.21071e-09
ENSMUSG00000023942	Slc29a1	10144.1	2729.82	0.269103	1.30932e-36
ENSMUSG00000033282	Rpgrip1l	1377.43	370.757	0.269165	2.31691e-27
ENSMUSG00000029924	Slc37a3	2672.74	720.345	0.269515	9.58682e-38
ENSMUSG00000020150	Gamt	134.639	36.2902	0.269538	3.88251e-08
ENSMUSG00000058351	2010107H07Rik	246.138	66.3869	0.269714	1.58746e-10
ENSMUSG00000026003	Acadl	5237.31	1413.74	0.269936	7.99915e-45
ENSMUSG00000032231	Anxa2	22878	6184.81	0.270338	3.24625e-41
ENSMUSG00000021822	Plau	4320.76	1168.56	0.270452	4.66823e-42
ENSMUSG00000048747	E130114P18Rik	109.848	29.7121	0.270484	1.108e-07
ENSMUSG00000025607	Copg2	9539.7	2580.51	0.270502	3.13595e-47
ENSMUSG00000022893	Adamts1	999.697	270.475	0.270557	0.00478028
ENSMUSG00000030600	Lrfn1	147.017	39.8024	0.270732	0.00438428
ENSMUSG00000019838	Slc16a10	447.17	121.068	0.270744	2.5742e-15
ENSMUSG00000029814	Igf2bp3	422.055	114.3	0.270819	2.99157e-14
ENSMUSG00000031402	Mpp1	2771.2	750.831	0.270941	4.00008e-37
ENSMUSG00000048337	Ppyr1	22.7447	6.16288	0.270959	0.00257187
ENSMUSG00000078768	Zfp566	264.602	71.7345	0.271104	3.75922e-11
ENSMUSG00000001173	Ocrl	2009.48	544.82	0.271125	1.48057e-24
ENSMUSG00000008763	Man1a2	5073.25	1377.13	0.27145	2.32462e-45
ENSMUSG00000022102	Dok2	173.703	47.2112	0.271792	6.50692e-09
ENSMUSG00000024968	Rcor2	295.185	80.2918	0.272005	7.07912e-12
ENSMUSG00000038954	Supt3h	810.725	220.664	0.272181	8.73515e-20
ENSMUSG00000054672	5830411N06Rik	31.3719	8.5419	0.272279	0.000596304
ENSMUSG00000020785	Camkk1	174.513	47.6111	0.272822	3.29469e-10
ENSMUSG00000049047	Armcx3	2208.55	602.742	0.272913	2.1802e-35
ENSMUSG00000062184	Hs6st2	298.705	81.5531	0.273022	1.31283e-13
ENSMUSG00000019789	Hey2	333.943	91.2127	0.273139	0.00215812
ENSMUSG00000005034	Prkacb	5164.69	1410.94	0.273189	1.2211e-43
ENSMUSG00000038486	Sv2a	154.247	42.1814	0.273467	1.51853e-08
ENSMUSG00000068323	Slc4a5	24.1106	6.59356	0.273471	0.000571196
ENSMUSG00000001349	Cnn1	7.1749	1.96371	0.273692	0.0600422
ENSMUSG00000053080	2700081O15Rik	5657.72	1550.09	0.273978	8.07824e-26
ENSMUSG00000019194	Scn1b	263.138	72.1037	0.274014	2.17332e-10
ENSMUSG00000032041	Tirap	938.825	257.39	0.274162	2.64207e-21
ENSMUSG00000041117	Ccdc8	5799.96	1590.16	0.274167	1.43438e-32
ENSMUSG00000022010	Tsc22d1	46520.3	12755.7	0.274196	3.7423e-35
ENSMUSG00000043207	Zmpste24	8442.81	2315.03	0.274201	8.02307e-46
ENSMUSG00000067377	Tspan6	659.496	180.851	0.274227	5.0884e-25
ENSMUSG00000024155	4930528F23Rik	30.1518	8.27016	0.274284	0.000377551
ENSMUSG00000035239	Neu3	1192.11	327.381	0.274625	1.57132e-24
ENSMUSG00000028949	Smarcd3	667.162	183.318	0.274772	2.15559e-19
ENSMUSG00000018377	Vezf1	8106.79	2228.18	0.274853	6.15386e-40
ENSMUSG00000031209	Heph	1838.72	505.438	0.274886	1.17083e-33
ENSMUSG00000034781	Gna11	3844.33	1057.45	0.275068	8.19662e-40
ENSMUSG00000053553	3110082I17Rik	569.04	156.543	0.275101	2.4679e-15
ENSMUSG00000029205	Chrna9	972.41	267.573	0.275164	1.50819e-18
ENSMUSG00000050875	A730017C20Rik	716.425	197.417	0.275559	4.15333e-20
ENSMUSG00000038502	Ptov1	9752.68	2691.16	0.275941	2.37595e-33
ENSMUSG00000024462	Gabbr1	2518.3	695.339	0.276115	8.13098e-06
ENSMUSG00000066643	Wdr35	3436.9	949.043	0.276134	4.3654e-38
ENSMUSG00000054932	Afp	63.3593	17.4991	0.276188	1.9449e-06
ENSMUSG00000000552	Zfp385a	1680.73	464.682	0.276477	3.46706e-30
ENSMUSG00000020483	Dynll2	21182.7	5863.26	0.276794	1.08105e-44
ENSMUSG00000041673	Lrrc18	240.173	66.5458	0.277075	3.20808e-10
ENSMUSG00000001120	Pcbp3	1304.33	361.498	0.277151	1.78903e-24
ENSMUSG00000029171	Pgm1	1060.93	294.183	0.277288	2.25556e-25
ENSMUSG00000050147	F2rl3	10.5923	2.93788	0.277361	0.0894261
ENSMUSG00000032374	Plod2	1861.3	516.636	0.277567	2.72037e-05
ENSMUSG00000031558	Slit2	530.947	147.607	0.278006	2.11565e-22
ENSMUSG00000049295	Zfp219	5272.56	1467.36	0.2783	5.72641e-17
ENSMUSG00000019843	Fyn	767.146	213.527	0.278339	1.7678e-20
ENSMUSG00000036867	Smad6	496.87	138.357	0.278457	5.97081e-16
ENSMUSG00000041949	Tmco7	1226.92	341.778	0.278567	7.32867e-23
ENSMUSG00000037784	Dzip1l	1323.21	368.83	0.278739	2.90777e-26
ENSMUSG00000048232	Fbxo10	6559.9	1829.02	0.278819	7.98631e-44
ENSMUSG00000001089	Luzp1	6420.38	1790.59	0.278892	6.35374e-44
ENSMUSG00000040857	Erf	1428.2	398.531	0.279045	1.09251e-10
ENSMUSG00000025170	Rab40b	78.3246	21.8572	0.279059	2.21372e-06
ENSMUSG00000022329	Stk3	2390.47	667.868	0.279388	1.6101e-33
ENSMUSG00000039298	Cdk5rap2	10052.6	2809.11	0.279441	1.05946e-45
ENSMUSG00000010663	Fads1	1074.8	300.376	0.279471	3.56341e-26
ENSMUSG00000023978	Prph2	67.2032	18.7911	0.279617	2.64374e-06
ENSMUSG00000038070	Cntln	2515.29	704.24	0.279983	7.43913e-18
ENSMUSG00000068855	Hist2h2ac	10.9972	3.08144	0.280203	0.0419902
ENSMUSG00000002325	Irf9	5478.4	1535.52	0.280286	8.80904e-44
ENSMUSG00000062619	2310039H08Rik	546.673	153.318	0.280457	1.74599e-13
ENSMUSG00000025950	Idh1	6439.63	1806.21	0.280484	5.5876e-44
ENSMUSG00000031095	Cul4b	5307.17	1490.11	0.280773	3.13027e-27
ENSMUSG00000026672	Optn	1298.23	364.533	0.280793	2.55937e-25
ENSMUSG00000078486	2310042D19Rik	1446.61	406.304	0.280867	2.09693e-21
ENSMUSG00000024597	Slc12a2	4313.11	1211.5	0.280889	1.55088e-42
ENSMUSG00000039953	Clstn1	29082.4	8181.51	0.281321	1.21369e-39
ENSMUSG00000047497	Adamts12	187.109	52.6716	0.281503	3.11268e-10
ENSMUSG00000066324	Impad1	6355.63	1789.38	0.281543	5.72736e-44
ENSMUSG00000055912	Tmem150a	256.536	72.3088	0.281866	7.17361e-11
ENSMUSG00000031328	Flna	82579.9	23283.6	0.281952	6.01543e-22
ENSMUSG00000040681	Hmgn1	16320	4602.13	0.281993	2.42323e-44
ENSMUSG00000040631	Dok4	626.958	176.857	0.282088	3.16149e-16
ENSMUSG00000089736	Gm14378	241.625	68.207	0.282285	2.5992e-05
ENSMUSG00000027661	Slc2a10	16.4013	4.62985	0.282286	0.00532767
ENSMUSG00000061288	Taok3	3274.77	924.443	0.282292	9.35176e-37
ENSMUSG00000038658	C030046E11Rik	8982.98	2536.23	0.282337	2.01231e-44
ENSMUSG00000036676	Tmtc3	4376.89	1236.24	0.282448	3.38941e-40
ENSMUSG00000030341	Tnfrsf1a	5916.98	1671.65	0.282518	4.81406e-43
ENSMUSG00000029675	Eln	1143.98	324.197	0.283394	1.46107e-29
ENSMUSG00000022433	Csnk1e	3433.77	973.228	0.283428	2.97987e-37
ENSMUSG00000028541	B4galt2	156.039	44.2425	0.283535	6.1113e-08
ENSMUSG00000047988	4933428G20Rik	179.34	50.8822	0.28372	2.97569e-09
ENSMUSG00000014353	Tmem87b	3411.44	968.506	0.283899	9.36819e-38
ENSMUSG00000078891	Gm11008	17.2543	4.90159	0.28408	0.0378934
ENSMUSG00000039005	Tlr4	500.606	142.29	0.284235	9.46957e-15
ENSMUSG00000063558	Aox1	1254.63	356.806	0.284392	1.31727e-08
ENSMUSG00000028223	Decr1	3199.28	910.379	0.284557	2.89706e-36
ENSMUSG00000025190	Got1	5362.44	1526.8	0.284721	1.69084e-41
ENSMUSG00000020541	Tom1l1	4674.93	1331.14	0.284739	9.2261e-40
ENSMUSG00000047996	Prrg1	590.808	168.249	0.284777	1.29321e-07
ENSMUSG00000020546	Stxbp4	1944.14	553.86	0.284887	7.14161e-29
ENSMUSG00000020538	Srebf1	13611.5	3887.69	0.285618	1.02051e-40
ENSMUSG00000049807	Arhgap23	2400.34	685.792	0.285706	1.42581e-32
ENSMUSG00000050332	Fam123b	1163.41	332.873	0.286118	9.88384e-23
ENSMUSG00000040836	Gpr161	400.849	114.747	0.286259	1.54904e-12
ENSMUSG00000037295	Ldlrap1	5151.8	1476.87	0.286671	5.47341e-40
ENSMUSG00000001750	Tcirg1	4079.39	1170.19	0.286855	7.11649e-13
ENSMUSG00000090215	Trim34b	94.6232	27.1587	0.28702	1.37653e-06
ENSMUSG00000025040	Fundc1	2456.42	705.266	0.287111	1.0434e-32
ENSMUSG00000054178	Gm9938	428.194	123.047	0.287364	5.11086e-13
ENSMUSG00000018547	Pip4k2b	1847.47	531.008	0.287425	1.11999e-27
ENSMUSG00000005107	Slc2a9	1413.9	406.494	0.287499	2.53326e-24
ENSMUSG00000030055	Rab43	2856.59	821.442	0.28756	6.67434e-34
ENSMUSG00000074579	Lekr1	176.581	50.8515	0.287978	1.35206e-08
ENSMUSG00000031310	Zmym3	3465.21	997.915	0.287981	2.7648e-20
ENSMUSG00000026620	Mark1	2280.65	657.106	0.288122	9.18457e-32
ENSMUSG00000045038	Prkce	1400.02	403.52	0.288225	5.7273e-25
ENSMUSG00000051675	Trim32	1301.01	375.1	0.288315	7.6252e-24
ENSMUSG00000002012	Pnck	102.057	29.4249	0.288318	9.23016e-07
ENSMUSG00000072964	Bhlhb9	5049.03	1456.09	0.28839	2.4955e-39
ENSMUSG00000006494	Pdk1	4608.26	1330.04	0.288621	3.09074e-38
ENSMUSG00000027428	Rbbp9	1312.71	379.027	0.288737	3.75344e-24
ENSMUSG00000039765	Cc2d2a	1471.28	424.962	0.288837	5.68556e-19
ENSMUSG00000033068	Entpd6	3261.99	942.383	0.288898	4.189e-34
ENSMUSG00000035234	Fam175a	406.825	117.556	0.28896	1.23491e-12
ENSMUSG00000027993	Trim2	612.824	177.191	0.289138	4.0224e-20
ENSMUSG00000035064	Eef2k	1962.09	567.441	0.289202	3.07247e-32
ENSMUSG00000045822	Zswim3	614.768	177.862	0.289316	1.51526e-14
ENSMUSG00000091191	Gm17334	1936.27	560.212	0.289325	0.00193406
ENSMUSG00000022528	Hes1	1089.03	315.117	0.289355	7.07938e-25
ENSMUSG00000056999	Ide	12802.6	3706.91	0.289544	1.23621e-42
ENSMUSG00000026176	Ctdsp1	5596.35	1621.77	0.289791	3.83013e-41
ENSMUSG00000031933	Folr4	11.618	3.36856	0.289943	0.0199507
ENSMUSG00000031851	Ntpcr	652.942	189.45	0.290148	1.33605e-15
ENSMUSG00000022177	Haus4	957.974	278.124	0.290326	9.50536e-21
ENSMUSG00000067924	Cxx1b	191.109	55.4967	0.290393	1.07008e-08
ENSMUSG00000005656	Snx6	7952.16	2311.26	0.290645	2.94389e-42
ENSMUSG00000027506	Tpd52	7701.91	2239.12	0.290723	2.35999e-42
ENSMUSG00000019850	Tnfaip3	8415.39	2446.95	0.29077	0.0322318
ENSMUSG00000036916	Zfp280c	1157.78	336.779	0.290885	2.42635e-08
ENSMUSG00000037685	Atp8a1	3002.24	873.391	0.290913	3.73862e-35
ENSMUSG00000048655	A730037C10Rik	17.3406	5.04515	0.290944	0.020743
ENSMUSG00000031224	Magee2	28.9155	8.41372	0.290976	0.00136703
ENSMUSG00000026269	Rnpepl1	12803	3726.79	0.291087	6.57312e-33
ENSMUSG00000033882	Rbm46	18.2584	5.3169	0.291202	0.0105818
ENSMUSG00000052387	Trpm3	930.684	271.105	0.291297	2.42524e-06
ENSMUSG00000032898	Fbxo21	5589.03	1628.11	0.291304	5.07427e-40
ENSMUSG00000036526	Card11	146.796	42.8377	0.291817	4.97034e-07
ENSMUSG00000022246	Rai14	6799.91	1984.63	0.291862	2.63101e-41
ENSMUSG00000004843	Chmp2b	5849.02	1707.6	0.291946	4.72401e-41
ENSMUSG00000031362	Xlr4c	11.0404	3.225	0.29211	0.0363733
ENSMUSG00000049044	Rapgef4	338.256	98.8112	0.292119	1.99291e-13
ENSMUSG00000020173	Cobl	5843.5	1707.66	0.292232	6.85204e-40
ENSMUSG00000009900	Wnt3a	57.4476	16.8121	0.29265	0.000326173
ENSMUSG00000079730	Gm2833	11.9366	3.49675	0.292944	0.0462293
ENSMUSG00000026484	Rnf2	2980.52	874.632	0.29345	7.79138e-22
ENSMUSG00000029530	Ccr9	881.237	258.636	0.293492	1.75079e-18
ENSMUSG00000019577	Pdk4	342.29	100.519	0.293665	0.000422865
ENSMUSG00000021311	Mtr	1344.89	395.522	0.294092	9.00946e-24
ENSMUSG00000055633	Zfp580	142.483	41.9404	0.294354	4.01008e-08
ENSMUSG00000033170	Card10	2085.56	613.919	0.294367	4.23226e-29
ENSMUSG00000032841	Prr5l	611.998	180.19	0.294429	1.01384e-18
ENSMUSG00000036093	Arl5a	3991.05	1175.87	0.294628	2.50867e-37
ENSMUSG00000026705	Klhl20	3041.18	896.438	0.294766	5.18586e-33
ENSMUSG00000032202	Rab27a	1445.48	426.29	0.294912	1.77245e-28
ENSMUSG00000040524	Zfp609	3014.28	889.219	0.295002	3.7265e-27
ENSMUSG00000054892	Txk	127.809	37.7925	0.295695	5.45176e-07
ENSMUSG00000051323	Pcdh19	883.235	261.205	0.295737	2.86915e-22
ENSMUSG00000054676	1600014C10Rik	5075.94	1501.58	0.295823	1.98055e-38
ENSMUSG00000019822	Smpd2	1404.2	415.497	0.295896	7.53153e-25
ENSMUSG00000032086	Bace1	3619.25	1071.54	0.296066	1.33476e-35
ENSMUSG00000024924	Vldlr	1693.21	501.537	0.296205	2.52527e-24
ENSMUSG00000046556	Zfp319	2990.63	886.086	0.296287	4.86248e-32
ENSMUSG00000024331	Dsc2	17848.7	5291.29	0.296452	1.44634e-38
ENSMUSG00000040711	Sh3pxd2b	4533.33	1344.57	0.296597	4.60347e-10
ENSMUSG00000034557	Zfyve9	3392.59	1006.38	0.296641	5.759e-35
ENSMUSG00000074203	G430095P16Rik	467.312	138.696	0.296794	2.40046e-12
ENSMUSG00000031652	N4bp1	3119.54	928.35	0.297591	5.38921e-35
ENSMUSG00000051855	Mest	499.532	148.914	0.298107	6.72838e-16
ENSMUSG00000039033	Tasp1	1029.73	306.975	0.298113	5.48958e-19
ENSMUSG00000031565	Fgfr1	230.142	68.6223	0.298174	2.63908e-10
ENSMUSG00000028633	Ctps	4748.54	1416.49	0.298301	9.3611e-18
ENSMUSG00000055148	Klf2	3889.18	1161.15	0.29856	7.4366e-14
ENSMUSG00000026535	Ifi202b	994.992	297.157	0.298652	0.0308327
ENSMUSG00000023333	Gcm1	70.3399	21.0112	0.29871	1.62846e-05
ENSMUSG00000022425	Enpp2	1068.53	319.337	0.298856	1.03775e-26
ENSMUSG00000029392	Rilpl1	523.259	156.384	0.298866	2.57295e-13
ENSMUSG00000055932	Fto	5289.61	1583.24	0.299311	1.50487e-38
ENSMUSG00000056895	Hist3h2ba	59.4127	17.7862	0.299367	6.11107e-05
ENSMUSG00000069117	Gm17352	20.5853	6.16288	0.299383	0.00928295
ENSMUSG00000021140	Pcnx	5522.69	1653.62	0.299422	5.3922e-39
ENSMUSG00000057265	2900006K08Rik	267.701	80.2457	0.299759	1.09455e-10
ENSMUSG00000044408	1110002B05Rik	2250.41	674.959	0.299927	3.67573e-32
ENSMUSG00000026883	Dab2ip	7131.85	2139.34	0.29997	3.13011e-40
ENSMUSG00000021594	Srd5a1	287.8	86.4393	0.300345	4.46575e-12
ENSMUSG00000021253	Tgfb3	1424.37	428.392	0.300759	6.33432e-28
ENSMUSG00000031176	Dynlt3	7654.75	2302.35	0.300774	5.64217e-40
ENSMUSG00000034462	Pkd2	3874.04	1168.06	0.30151	1.71033e-19
ENSMUSG00000044906	4930503L19Rik	167.209	50.4362	0.301636	5.27723e-08
ENSMUSG00000078429	Ctdsp2	7349.78	2218.16	0.3018	6.37925e-40
ENSMUSG00000041046	Ramp3	1726.48	521.44	0.302026	4.24305e-23
ENSMUSG00000032657	Fam189b	663.923	200.899	0.302594	7.02766e-15
ENSMUSG00000032959	Pebp1	9215.36	2789.21	0.302669	9.95001e-36
ENSMUSG00000037104	Socs5	503.316	152.554	0.303099	5.78609e-15
ENSMUSG00000035208	Slfn8	519.2	157.6	0.303543	0.000123782
ENSMUSG00000043391	2510009E07Rik	1716.74	521.287	0.30365	3.70958e-26
ENSMUSG00000039096	Rsad1	1331.19	404.32	0.303727	2.84246e-21
ENSMUSG00000052419	2610001J05Rik	1421.17	431.72	0.303778	5.82868e-24
ENSMUSG00000072568	Fam84b	2341.93	711.746	0.303915	7.39798e-31
ENSMUSG00000041592	Sdk2	1656.34	503.659	0.30408	1.81648e-05
ENSMUSG00000027035	Lass6	3932.97	1196.39	0.304196	6.00393e-36
ENSMUSG00000019846	Lama4	5868.06	1786.91	0.304515	1.60189e-38
ENSMUSG00000038633	Degs1	2670.2	814.121	0.304892	1.69552e-31
ENSMUSG00000005779	Psmb4	24024.5	7325.16	0.304904	1.0488e-18
ENSMUSG00000022510	Trp63	18648.3	5689.14	0.305075	1.39371e-33
ENSMUSG00000029469	Ift81	1826	557.213	0.305155	1.3295e-26
ENSMUSG00000058446	Znrf2	8280.96	2528	0.305278	2.50031e-39
ENSMUSG00000031925	Maml2	1297.4	396.322	0.305474	2.02297e-14
ENSMUSG00000038387	Rras	2824.15	864.747	0.306198	8.05672e-32
ENSMUSG00000034118	Tpst1	818.655	250.761	0.306308	1.0048e-16
ENSMUSG00000066258	Trim12a	1090.25	334.072	0.306418	5.01786e-09
ENSMUSG00000028383	Hsdl2	3518.7	1078.3	0.306449	1.48618e-33
ENSMUSG00000031379	Pir	515.42	158	0.306545	9.5993e-13
ENSMUSG00000039105	Atp6v1g1	9002.12	2761.02	0.306707	3.23644e-39
ENSMUSG00000035109	Shc4	2465.15	756.471	0.306866	2.45858e-29
ENSMUSG00000078932	CN725425	29.1693	8.95721	0.307077	0.00265411
ENSMUSG00000066057	2610044O15Rik	89.9426	27.6202	0.307086	7.62144e-05
ENSMUSG00000071770	Rhox4e	9.56653	2.93788	0.3071	0.0906376
ENSMUSG00000004655	Aqp1	149.954	46.0781	0.307281	1.05322e-06
ENSMUSG00000091337	Eid1	5706.31	1754.24	0.307421	9.10644e-38
ENSMUSG00000040007	Bahd1	9248.07	2843.82	0.307504	1.98347e-39
ENSMUSG00000040022	Rab11fip2	2306.95	709.511	0.307553	2.39251e-17
ENSMUSG00000023460	Rab12	3881.76	1195.64	0.308014	1.18742e-34
ENSMUSG00000036944	Tmem71	25.4765	7.85485	0.308317	0.00810359
ENSMUSG00000040043	Rbms2	2866.33	884.363	0.308535	1.86282e-32
ENSMUSG00000071292	Gm5451	16.763	5.17334	0.308616	0.025238
ENSMUSG00000021265	Slc25a29	1111.55	343.245	0.308798	1.05511e-08
ENSMUSG00000091243	Vgll3	68.9524	21.2983	0.308885	1.4663e-05
ENSMUSG00000032036	Kirrel3	659.436	203.867	0.309154	1.88093e-18
ENSMUSG00000034422	Parp14	5426.85	1678.52	0.309299	1.35603e-05
ENSMUSG00000036862	Dchs1	257.475	79.7176	0.309612	6.86349e-10
ENSMUSG00000027387	Zc3h8	355.219	110.004	0.309679	5.8391e-11
ENSMUSG00000022389	Tef	6625.22	2054.67	0.310128	1.64269e-37
ENSMUSG00000028093	Acp6	1279.5	397.183	0.31042	4.93966e-21
ENSMUSG00000078870	Gm14410	71.3061	22.1443	0.310553	5.06367e-05
ENSMUSG00000024352	Spata24	194.375	60.3983	0.310731	6.44033e-09
ENSMUSG00000047767	Atg16l2	1847.56	574.399	0.310896	9.31036e-24
ENSMUSG00000039987	Phtf2	1601.85	498.035	0.310913	4.65207e-17
ENSMUSG00000027259	Adal	862.541	268.403	0.311177	2.09909e-16
ENSMUSG00000022622	Acr	14.4146	4.48629	0.311233	0.0237276
ENSMUSG00000041773	Enc1	6651.8	2074.37	0.311851	2.63911e-27
ENSMUSG00000025151	Maged1	24421.3	7620.36	0.312037	5.3203e-35
ENSMUSG00000024588	Fech	2486.73	776.016	0.312063	2.61236e-30
ENSMUSG00000041809	Efhc1	188.215	58.7371	0.312074	1.00938e-06
ENSMUSG00000039741	Bahcc1	1700.03	530.587	0.312104	1.7969e-22
ENSMUSG00000026473	Glul	8665.29	2705.08	0.312174	9.03535e-39
ENSMUSG00000079020	Slc45a4	6478.49	2024.09	0.312432	1.63238e-31
ENSMUSG00000074661	Pde4d	257.53	80.502	0.312593	1.1008e-09
ENSMUSG00000032058	Ppp2r1b	5172.66	1619.52	0.313092	1.84683e-35
ENSMUSG00000071252	2210408I21Rik	708.57	222.069	0.313404	1.60777e-15
ENSMUSG00000073678	Pgap1	43.735	13.7306	0.313951	0.000381164
ENSMUSG00000035877	Zhx3	1203.25	377.961	0.314117	7.11185e-21
ENSMUSG00000029561	Oasl2	23051	7242.24	0.314184	6.43929e-32
ENSMUSG00000020089	Ppa1	5990.85	1882.44	0.314219	9.69914e-37
ENSMUSG00000011832	Evi5l	1812.16	569.662	0.314355	4.39707e-25
ENSMUSG00000022106	Rcbtb2	6420.03	2018.91	0.31447	4.5228e-37
ENSMUSG00000046470	Sox18	10.2305	3.225	0.315233	0.0442556
ENSMUSG00000027408	Cpxm1	1704.66	537.458	0.315287	4.03882e-19
ENSMUSG00000043110	Lrrn4	47.9838	15.1355	0.315429	2.29372e-05
ENSMUSG00000039577	Nphp4	90.1369	28.4354	0.315469	8.79204e-06
ENSMUSG00000041748	Ccrl1	265.077	83.6604	0.315608	5.85942e-09
ENSMUSG00000049871	Nlrc3	95.4383	30.1274	0.315674	5.25807e-06
ENSMUSG00000036109	Mbnl3	3768.58	1191.27	0.316105	2.63059e-16
ENSMUSG00000071064	Zfp827	1861.45	588.617	0.316214	5.00772e-26
ENSMUSG00000047238	Mageh1	536.394	169.813	0.316582	5.99518e-13
ENSMUSG00000058230	Grlf1	6494.62	2056.95	0.316716	3.53973e-37
ENSMUSG00000075012	Fjx1	116.277	36.8491	0.316907	6.96656e-07
ENSMUSG00000001119	Col6a1	7902.82	2504.52	0.316915	0.0288166
ENSMUSG00000026991	Pkp4	7454.89	2363.05	0.31698	5.00487e-37
ENSMUSG00000026482	Rgl1	2008.77	636.756	0.316987	3.13826e-24
ENSMUSG00000059482	2610301B20Rik	1695.1	537.781	0.317256	1.20618e-23
ENSMUSG00000026727	Rsu1	2722.88	864.429	0.317469	2.14348e-29
ENSMUSG00000019845	Tube1	539.795	171.474	0.317664	1.8007e-12
ENSMUSG00000037075	Rnf139	2497.5	793.392	0.317674	4.28622e-29
ENSMUSG00000079164	Tlr5	156.061	49.5902	0.317762	1.52054e-07
ENSMUSG00000033306	Lpp	13452.5	4279.66	0.318131	2.02355e-14
ENSMUSG00000038894	Irs2	6174.74	1965.02	0.318234	2.67209e-08
ENSMUSG00000032216	Nedd4	84118.6	26786.6	0.318439	4.48552e-21
ENSMUSG00000027209	4930525F21Rik	70.3615	22.4161	0.318585	2.33793e-05
ENSMUSG00000032228	Tcf12	9930.28	3165.29	0.318751	9.56865e-23
ENSMUSG00000005474	Myl10	33.3586	10.6338	0.318773	0.00120703
ENSMUSG00000074664	A830092H15Rik	134.39	42.8684	0.318985	3.71548e-06
ENSMUSG00000037736	Limch1	6008.2	1916.54	0.318987	4.69301e-14
ENSMUSG00000050050	Ccdc158	28.9802	9.24432	0.318987	0.00228809
ENSMUSG00000075593	Gal3st4	286.58	91.4998	0.319282	4.70874e-06
ENSMUSG00000032352	Lrrc1	3568.16	1140.52	0.319638	3.14508e-32
ENSMUSG00000040998	Npnt	12615.4	4042.19	0.320418	1.17658e-36
ENSMUSG00000022414	Tab1	2601.31	833.784	0.320525	5.71442e-24
ENSMUSG00000027332	Ivd	4325.76	1387.2	0.320683	5.3146e-33
ENSMUSG00000036334	Igsf10	2384.65	764.905	0.320762	3.10192e-08
ENSMUSG00000025153	Fasn	29353.7	9418.27	0.320855	5.52976e-33
ENSMUSG00000041935	AW549877	4053.52	1301	0.320957	2.43117e-32
ENSMUSG00000024691	Fam111a	382.823	122.873	0.320966	7.98569e-11
ENSMUSG00000034324	Tmem132c	53.2151	17.0992	0.321322	6.65362e-05
ENSMUSG00000030386	Zfp606	741.097	238.225	0.321449	1.64321e-15
ENSMUSG00000018340	Anxa6	13172.3	4235.83	0.321572	1.20003e-35
ENSMUSG00000031355	Arhgap6	481.279	154.821	0.321686	1.65446e-09
ENSMUSG00000060260	Pwwp2b	1086.76	350.561	0.322575	1.50853e-17
ENSMUSG00000063303	Gm10129	859.728	277.807	0.323133	1.07925e-11
ENSMUSG00000074355	Gm10676	357.297	115.48	0.323203	1.42045e-09
ENSMUSG00000026718	Stam	2830.11	914.768	0.323227	1.45218e-28
ENSMUSG00000050812	AI314180	30085.6	9729.32	0.323388	9.07457e-32
ENSMUSG00000030446	Zfp273	110.49	35.7314	0.32339	4.42703e-06
ENSMUSG00000060002	Chpt1	1380.81	446.645	0.323467	3.21932e-22
ENSMUSG00000045008	9030612E09Rik	17.3191	5.60402	0.323575	0.0625778
ENSMUSG00000029090	Gpr125	2102.35	680.352	0.323615	3.88195e-27
ENSMUSG00000046618	Olfml2a	6739.32	2181.1	0.323638	2.39189e-25
ENSMUSG00000078863	Gm14325	244.168	79.1279	0.324072	3.22267e-08
ENSMUSG00000058325	Dock1	11147.3	3614.24	0.324225	2.77122e-36
ENSMUSG00000040124	Gorab	802.815	260.343	0.324288	1.71954e-15
ENSMUSG00000031575	Ash2l	6963.53	2259.51	0.324477	2.72009e-35
ENSMUSG00000002957	Ap2a2	7157.61	2323.36	0.3246	8.21112e-36
ENSMUSG00000032249	Anp32a	5252.39	1705.08	0.324629	1.19982e-34
ENSMUSG00000078485	Plekhn1	2553.44	829.067	0.324686	1.94527e-27
ENSMUSG00000051499	Zfp786	80.7268	26.2153	0.324741	0.00332967
ENSMUSG00000016933	Plcg1	5551.79	1804.75	0.325074	1.35559e-13
ENSMUSG00000033998	Kcnk1	53.431	17.3709	0.325109	0.000347351
ENSMUSG00000031875	Cmtm3	813.791	264.824	0.325421	2.6747e-17
ENSMUSG00000053646	Plxnb1	24326.8	7917.09	0.325447	8.19822e-13
ENSMUSG00000030559	Rab38	138.957	45.2628	0.325732	2.00278e-07
ENSMUSG00000049588	Ccdc69	72.7368	23.6927	0.325733	1.41634e-05
ENSMUSG00000020262	Adarb1	1277.95	416.389	0.325826	1.85151e-20
ENSMUSG00000062078	Qk	6852.38	2234.85	0.326142	3.13066e-30
ENSMUSG00000037003	Tenc1	2060.54	673.159	0.326691	3.23561e-23
ENSMUSG00000060519	Tor3a	2045.88	668.698	0.326851	4.04731e-27
ENSMUSG00000062040	Zfp27	482.062	157.646	0.327024	8.31685e-12
ENSMUSG00000047907	Tshz2	198.748	64.9974	0.327034	1.05544e-08
ENSMUSG00000037541	Shank2	3378.48	1106.63	0.327552	1.79707e-28
ENSMUSG00000060441	Trim5	456.942	149.76	0.327744	1.21917e-11
ENSMUSG00000056531	Ccdc18	799.096	261.907	0.327754	4.04329e-09
ENSMUSG00000069874	Irgm2	1386.05	454.31	0.327773	1.20958e-09
ENSMUSG00000030257	Srgap3	3001.51	983.815	0.327773	5.25298e-10
ENSMUSG00000078787	Cyp2t4	38.8869	12.7564	0.328039	0.000904432
ENSMUSG00000081769	Gm12216	675.023	221.587	0.328266	1.58283e-12
ENSMUSG00000028675	Pnrc2	12633.3	4147.27	0.328281	7.1227e-21
ENSMUSG00000058254	Tspan7	620.037	203.549	0.328286	1.42902e-05
ENSMUSG00000058883	Zfp708	239.579	78.728	0.32861	3.44011e-08
ENSMUSG00000037709	Fam13a	1934.86	636.233	0.328827	3.82113e-25
ENSMUSG00000063889	Crem	862.223	283.826	0.329179	8.47905e-16
ENSMUSG00000055137	5033411D12Rik	219.485	72.2626	0.329238	1.33566e-07
ENSMUSG00000002617	Zfp40	611.577	201.458	0.329407	6.31631e-13
ENSMUSG00000048960	Prex2	1048.47	345.393	0.329425	1.42138e-12
ENSMUSG00000020808	Fam64a	516.317	170.1	0.329448	8.33355e-12
ENSMUSG00000001482	Def8	3462.92	1141.32	0.329583	3.79445e-30
ENSMUSG00000025586	Cpeb1	1945.54	641.417	0.329685	5.30119e-21
ENSMUSG00000063179	Pstk	462.464	152.488	0.329729	1.14741e-11
ENSMUSG00000079735	Gm2792	42.8603	14.1459	0.330047	0.000940056
ENSMUSG00000042446	Zmym4	4333.4	1431.62	0.330368	3.78193e-32
ENSMUSG00000026782	Abi2	4448.69	1469.73	0.330375	3.9941e-32
ENSMUSG00000067085	Gm10197	239.147	79.0305	0.330468	2.31857e-08
ENSMUSG00000051486	Pcdhb11	25.8383	8.5419	0.330591	0.00511801
ENSMUSG00000055951	Ccl25	94.877	31.3733	0.330673	3.75833e-05
ENSMUSG00000031517	Gpm6a	347.801	115.018	0.330701	1.38782e-09
ENSMUSG00000022948	Setd4	295.612	97.7601	0.330704	5.57807e-09
ENSMUSG00000021365	Nedd9	4914.78	1627.18	0.331078	4.54731e-12
ENSMUSG00000022657	Cd96	131.318	43.5247	0.331445	0.000323585
ENSMUSG00000036452	Arhgap26	3651.46	1210.9	0.331621	5.88655e-31
ENSMUSG00000044167	Foxo1	3220.65	1068.55	0.331782	3.17781e-29
ENSMUSG00000033610	Pank1	736.579	244.387	0.331787	5.49975e-15
ENSMUSG00000074093	Svip	237.192	78.7588	0.332046	1.18185e-08
ENSMUSG00000020780	Srp68	13087.7	4349.44	0.33233	5.10343e-35
ENSMUSG00000020096	Tbata	86649.6	28798.5	0.332355	8.40547e-23
ENSMUSG00000026088	Mitd1	697.81	232.144	0.332675	1.92663e-15
ENSMUSG00000050017	Pitpnb	10570.3	3517.9	0.332808	1.32612e-34
ENSMUSG00000059674	Cdh24	516.171	171.807	0.332849	1.3811e-11
ENSMUSG00000055027	Smyd1	24.4076	8.1266	0.332954	0.00211806
ENSMUSG00000074622	Mafb	3016.16	1004.41	0.33301	4.65146e-29
ENSMUSG00000078851	Hist3h2a	566.865	188.829	0.333112	8.08076e-13
ENSMUSG00000047307	Pcdhb13	39.9558	13.3153	0.333251	0.000836359
ENSMUSG00000026791	Slc2a8	903.97	301.289	0.333295	5.6328e-13
ENSMUSG00000028086	Fbxw7	5628.93	1876.12	0.3333	4.8703e-20
ENSMUSG00000040699	Limd2	2647.75	883.138	0.333542	9.64338e-28
ENSMUSG00000032018	Sc5d	5253.66	1754.37	0.333933	2.00446e-32
ENSMUSG00000071181	3830408C21Rik	20.5421	6.86531	0.334206	0.0215633
ENSMUSG00000026602	Nphs2	43.994	14.7202	0.334595	0.000431754
ENSMUSG00000000295	Hddc2	490.548	164.193	0.334713	3.18376e-11
ENSMUSG00000061322	Dnaic1	198.214	66.3869	0.334926	5.77947e-09
ENSMUSG00000034110	Kctd7	258.307	86.5675	0.335134	1.41499e-08
ENSMUSG00000038718	Pbx3	1246.51	418.051	0.335377	1.83659e-18
ENSMUSG00000042743	Sgtb	136.987	45.9653	0.335545	1.17923e-06
ENSMUSG00000022837	Iqcb1	1690.41	567.918	0.335965	1.40481e-14
ENSMUSG00000042500	Eif2c4	918.731	308.765	0.336077	8.46969e-13
ENSMUSG00000028601	Echdc2	893.179	300.412	0.33634	7.04778e-17
ENSMUSG00000021098	4930447C04Rik	470.045	158.174	0.336508	0.000154939
ENSMUSG00000027430	Dtd1	818.936	275.581	0.336511	1.08034e-15
ENSMUSG00000052155	Acvr2a	1355.06	456.115	0.336601	5.28635e-19
ENSMUSG00000034449	Dhrs11	1111.75	374.254	0.336637	2.92313e-18
ENSMUSG00000028591	Pramef12	94.0024	31.6604	0.336804	1.56582e-05
ENSMUSG00000023330	Dtwd1	364.548	122.888	0.337098	3.91519e-10
ENSMUSG00000000326	Comt	8405.09	2833.79	0.337152	4.95471e-33
ENSMUSG00000045896	Paip2b	2532.97	854.236	0.337246	9.39344e-27
ENSMUSG00000004415	Emid2	58.1495	19.6218	0.337436	7.0889e-05
ENSMUSG00000078877	Gm14295	73.4603	24.8105	0.33774	8.20077e-05
ENSMUSG00000064036	Mro	183.308	61.916	0.33777	5.66841e-07
ENSMUSG00000038859	Baiap2l1	1536.54	519.22	0.337914	4.1785e-24
ENSMUSG00000026235	Epha4	1533.02	518.21	0.338033	3.62544e-20
ENSMUSG00000047583	Tyw3	223.841	75.6773	0.338085	4.61261e-08
ENSMUSG00000025330	Padi4	52.5996	17.7862	0.338144	0.00163902
ENSMUSG00000028229	Fam82b	898.297	303.945	0.338357	2.65433e-15
ENSMUSG00000007379	Dennd2c	4632.34	1567.64	0.338413	2.04019e-17
ENSMUSG00000038740	Fam125b	2656.32	899.376	0.338579	8.13261e-27
ENSMUSG00000064061	Dzip3	2510.02	850.057	0.338665	6.84329e-15
ENSMUSG00000037148	Arhgap10	2154.97	729.814	0.338666	4.14373e-23
ENSMUSG00000014980	Tsen15	916.534	310.836	0.339143	2.24036e-15
ENSMUSG00000042388	Dlgap3	1911.96	648.764	0.339319	1.13176e-22
ENSMUSG00000037761	Actr5	1867.97	633.859	0.339331	1.96045e-21
ENSMUSG00000000901	Mmp11	49.1174	16.6685	0.33936	0.000491327
ENSMUSG00000032560	Dnajc13	27050.7	9180.04	0.339365	4.93896e-30
ENSMUSG00000030272	Camk1	272.446	92.5047	0.339534	7.64719e-10
ENSMUSG00000035697	Hmha1	1973.81	670.842	0.339871	3.38934e-05
ENSMUSG00000041396	2810422O20Rik	179.491	61.07	0.34024	6.28108e-07
ENSMUSG00000000708	Kat2b	3006.87	1023.17	0.340278	5.41615e-29
ENSMUSG00000022099	Epb4.9	1760.44	600.025	0.340837	5.32863e-20
ENSMUSG00000023348	Trip6	2379.71	811.772	0.341122	4.13054e-25
ENSMUSG00000079017	Ifi27l2a	1567.98	534.904	0.341141	2.26255e-11
ENSMUSG00000051817	Sox12	965.403	329.468	0.341275	7.59544e-15
ENSMUSG00000030102	Itpr1	2655.63	906.415	0.341319	8.14593e-28
ENSMUSG00000020696	Rffl	4170.32	1423.74	0.341398	7.19488e-30
ENSMUSG00000052102	Gnpda1	1570.35	536.12	0.341401	3.08803e-20
ENSMUSG00000028195	Cyr61	5189.69	1773.54	0.341742	0.00200431
ENSMUSG00000041653	Pnpla3	542.819	185.589	0.341898	3.34454e-12
ENSMUSG00000027439	Gzf1	2102.49	718.868	0.341913	3.19765e-23
ENSMUSG00000001098	Kctd10	7201.37	2463.56	0.342097	1.42197e-32
ENSMUSG00000026014	Raph1	2031.15	694.955	0.342148	1.02146e-17
ENSMUSG00000079845	Xlr4a	24.5371	8.39834	0.342271	0.0409982
ENSMUSG00000025013	Tll2	25.3686	8.68546	0.342371	0.00646358
ENSMUSG00000020956	6530401N04Rik	437.776	149.934	0.342491	9.08371e-11
ENSMUSG00000047910	Pcdhb16	113.135	38.7821	0.342793	7.66502e-06
ENSMUSG00000058013	Sept11	8843.21	3031.42	0.342796	5.17027e-33
ENSMUSG00000057329	Bcl2	4383.51	1502.93	0.342859	1.57527e-29
ENSMUSG00000050666	E130203B14Rik	243.207	83.486	0.343272	2.05009e-08
ENSMUSG00000069808	Fam57a	1802.66	619.939	0.343903	4.48876e-22
ENSMUSG00000000532	Acvr1b	2012.55	692.463	0.344073	8.3419e-25
ENSMUSG00000029405	G3bp2	15761.1	5425.07	0.344207	7.1357e-32
ENSMUSG00000035585	Tsen34	2691.4	926.939	0.344408	2.45741e-26
ENSMUSG00000063253	Scoc	2238.73	771.037	0.344408	3.50978e-24
ENSMUSG00000044551	9930012K11Rik	272.343	93.8481	0.344595	3.33415e-08
ENSMUSG00000026131	Dst	61283.3	21140.7	0.344967	1.45991e-09
ENSMUSG00000001082	Mfsd10	2068.61	713.874	0.345099	8.87196e-24
ENSMUSG00000028369	Svep1	168.532	58.1988	0.345329	0.00265048
ENSMUSG00000021010	Npas3	45.0145	15.5508	0.345461	0.000669635
ENSMUSG00000020364	Zfp354a	65.2596	22.5596	0.34569	0.000209423
ENSMUSG00000029059	2810405K02Rik	15608.3	5399.27	0.345924	1.88382e-15
ENSMUSG00000069089	Cdk7	3355.54	1161.13	0.346034	4.02325e-27
ENSMUSG00000031907	Zfp90	840.115	290.85	0.346203	2.21895e-15
ENSMUSG00000040003	Magi2	259.289	89.7771	0.346243	2.18034e-08
ENSMUSG00000057147	Atpbd4	1507.01	522.086	0.346438	7.15004e-20
ENSMUSG00000019804	Snx3	8459.48	2932.04	0.346598	1.86621e-32
ENSMUSG00000035901	Dennd5a	5041.53	1747.96	0.346712	3.87337e-30
ENSMUSG00000033808	Tmem87a	5029.39	1744.06	0.346775	9.60634e-24
ENSMUSG00000092299	Psmb9	11822.1	4099.76	0.346787	1.51977e-32
ENSMUSG00000039234	Sec24d	11726.4	4068.08	0.346917	1.60792e-32
ENSMUSG00000001288	Rarg	2411.71	836.911	0.34702	1.43771e-25
ENSMUSG00000026833	Olfm1	364.111	126.354	0.347022	2.9858e-06
ENSMUSG00000074682	Zcchc3	461.077	160.138	0.347312	1.33927e-10
ENSMUSG00000041491	Cep78	881.707	306.432	0.347544	1.72668e-15
ENSMUSG00000022641	Bbx	3987.74	1386.18	0.34761	3.62304e-29
ENSMUSG00000052407	4930473A06Rik	1110.33	386.564	0.348152	5.91732e-17
ENSMUSG00000047963	Stbd1	191.789	66.7868	0.34823	4.20626e-07
ENSMUSG00000031093	Dock11	869.468	303.084	0.348585	9.26814e-16
ENSMUSG00000020766	Galk1	1734.67	604.716	0.348606	6.5485e-15
ENSMUSG00000061143	Maml3	2250.26	784.516	0.348633	2.15112e-23
ENSMUSG00000073617	Hdac4	1161.91	405.099	0.348649	2.24987e-17
ENSMUSG00000032402	Smad3	6149.21	2144.85	0.3488	4.3353e-30
ENSMUSG00000028536	2610528J11Rik	208.833	72.8676	0.348928	1.59435e-07
ENSMUSG00000038418	Egr1	39631.2	13832.5	0.349031	0.0441023
ENSMUSG00000033781	Asb13	1567.35	547.389	0.349244	7.63161e-21
ENSMUSG00000028709	Mob3c	1507.5	526.619	0.349331	4.00061e-13
ENSMUSG00000061887	Ssbp3	8230.38	2879.19	0.349825	4.98679e-32
ENSMUSG00000030056	Isy1	3508.95	1227.78	0.349899	7.58588e-27
ENSMUSG00000020423	Btg2	8826.56	3091.43	0.350242	5.21536e-06
ENSMUSG00000037395	Rcor3	1375.92	482.007	0.350316	3.2758e-19
ENSMUSG00000017774	Myo1c	10664.9	3736.27	0.350334	8.30439e-32
ENSMUSG00000024253	Dync2li1	1845.72	646.774	0.350418	6.48479e-22
[truncated: 6,518 more rows]

## Sheet: 3
Go back to DESeq comparisons
cTEC vs Aire_pos_TEC (>2 fold, 5% FDR, DESeq analysis)
Ensembl ID	Gene Symbol	cTEC (mean counts)	Aire_pos_TEC (mean counts)	Fold Change	FDR (BH)
ENSMUSG00000034689	4921530L21Rik	15.7373	0	0	0.000235094
ENSMUSG00000040775	Gm9772	3.33101	0	0	0.0305883
ENSMUSG00000041165	Spem1	6.14916	0	0	0.0423291
ENSMUSG00000048087	Gm4737	2.86132	0	0	0.0451532
ENSMUSG00000066007	Zfp600	2.9045	0	0	0.0941438
ENSMUSG00000073810	Ifnz	2.86132	0	0	0.0465494
ENSMUSG00000078752	Gm12776	4.33516	0	0	0.0081364
ENSMUSG00000079699	Gm6592	4.29198	0	0	0.00957676
ENSMUSG00000089634	Nat8b	3.37419	0	0	0.0250559
ENSMUSG00000090897	Gm5494	8.11428	0	0	0.000437362
ENSMUSG00000091159	Gm17545	3.3526	0	0	0.041727
ENSMUSG00000091222	Gm17723	28.9155	0	0	4.76569e-10
ENSMUSG00000093430	Isl2	25.9678	0	0	2.44618e-10
ENSMUSG00000056468	5730596B20Rik	151.229	0.477076	0.00315466	3.59252e-10
ENSMUSG00000061353	Cxcl12	43194.6	150.077	0.00347445	0
ENSMUSG00000012017	Scarf2	8968.11	35.4703	0.00395515	3.18733e-82
ENSMUSG00000006179	Prss16	302291	1213.37	0.00401392	2.68879e-69
ENSMUSG00000022122	Ednrb	3697.72	16.2905	0.00440555	1.04126e-176
ENSMUSG00000026188	Tmem169	3703.62	20.6218	0.00556801	3.36407e-203
ENSMUSG00000072423	Psmb11	45444.8	257.614	0.00566873	1.6177e-46
ENSMUSG00000037624	Kcnk2	6538.49	39.3514	0.00601842	1.38307e-283
ENSMUSG00000039252	Lgi2	8349.44	51.8038	0.00620446	0
ENSMUSG00000062563	Cys1	469.035	3.37716	0.00720025	3.349e-59
ENSMUSG00000048285	Frmd6	51097.6	380.595	0.0074484	3.03428e-73
ENSMUSG00000043099	Hic1	6161.67	47.9764	0.00778627	3.69711e-31
ENSMUSG00000030087	Klf15	2746.95	23.9828	0.0087307	5.832e-49
ENSMUSG00000017767	1700020C07Rik	741.206	6.71132	0.0090546	4.79331e-21
ENSMUSG00000021477	Ctsl	382821	3627.73	0.00947631	2.39466e-161
ENSMUSG00000022415	Syngr1	12414.9	138.746	0.0111758	8.5066e-317
ENSMUSG00000025105	Bnc1	3175.8	36.4728	0.0114846	1.62522e-186
ENSMUSG00000026574	Dpt	1150.9	13.4334	0.0116721	3.91135e-90
ENSMUSG00000021760	Gpx8	1234.44	15.3256	0.012415	8.77643e-105
ENSMUSG00000029844	Hoxa1	180.252	2.40151	0.013323	6.19923e-34
ENSMUSG00000000942	Hoxa4	103.591	1.44736	0.0139719	2.2306e-25
ENSMUSG00000004473	Clec11a	2088.71	29.2737	0.0140152	5.85469e-106
ENSMUSG00000074743	Thbd	2026.69	29.3436	0.0144786	3.63714e-124
ENSMUSG00000048728	Zfp454	63.2945	0.959528	0.0151597	1.01719e-14
ENSMUSG00000079560	Hoxa3	1316.63	20.134	0.0152921	3.50169e-104
ENSMUSG00000020424	Gatsl3	9215.68	156.344	0.016965	2.16093e-158
ENSMUSG00000028020	Glrb	1472.67	25.4087	0.0172535	3.02519e-85
ENSMUSG00000037379	Spon2	4364.41	75.3149	0.0172566	2.91739e-50
ENSMUSG00000031740	Mmp2	11147.2	197.202	0.0176908	1.37958e-278
ENSMUSG00000039873	Neurl2	3871.58	68.5444	0.0177045	2.56257e-171
ENSMUSG00000017754	Pltp	76860.2	1386.83	0.0180436	2.40961e-115
ENSMUSG00000032714	Syde1	712.376	12.9294	0.0181497	8.68747e-74
ENSMUSG00000007805	Twist2	470.562	8.64113	0.0183634	7.8735e-27
ENSMUSG00000064329	Scn1a	963.309	18.7511	0.0194653	1.74787e-16
ENSMUSG00000004631	Sgce	776.464	15.8457	0.0204075	3.02648e-71
ENSMUSG00000051041	Olfml1	2652.4	54.6555	0.020606	3.89297e-83
ENSMUSG00000042200	Cdrt4	22.5504	0.477076	0.021156	1.80304e-08
ENSMUSG00000051048	P4ha3	7241.41	153.616	0.0212135	6.05595e-174
ENSMUSG00000042351	Grap2	3912.81	88.7483	0.0226815	3.39526e-163
ENSMUSG00000050623	1700019N12Rik	478.321	11.005	0.0230076	2.45738e-51
ENSMUSG00000014704	Hoxa2	778.203	18.7027	0.0240332	1.75204e-71
ENSMUSG00000050520	Cldn8	1330.8	32.1684	0.0241721	3.41764e-85
ENSMUSG00000053399	Adamts18	1591.51	39.8177	0.0250188	1.64692e-41
ENSMUSG00000051226	Gm9851	7436	187.119	0.0251639	4.88774e-213
ENSMUSG00000032440	Tgfbr2	8676.48	225.484	0.0259879	4.25445e-233
ENSMUSG00000030554	Synm	19261.9	501.302	0.0260257	6.34466e-270
ENSMUSG00000079355	Ccrl1	8875.67	233.637	0.0263233	1.91067e-44
ENSMUSG00000020793	Galr2	1902.13	50.4478	0.0265218	6.11196e-97
ENSMUSG00000041624	Gucy1a2	2635.49	70.5119	0.0267547	9.38874e-36
ENSMUSG00000022687	Boc	7950.86	214.436	0.0269701	9.33795e-18
ENSMUSG00000052713	Zfp608	3834.08	108.427	0.0282797	4.11708e-23
ENSMUSG00000044349	Snhg11	16386.9	474.012	0.0289263	1.18578e-36
ENSMUSG00000057880	Abat	14399.1	416.537	0.0289279	7.50756e-246
ENSMUSG00000030701	Plekhb1	6251.09	182.755	0.0292357	5.22262e-42
ENSMUSG00000021483	Cdk20	4926.51	144.905	0.0294133	1.17011e-45
ENSMUSG00000074415	2610203C20Rik	1366.14	40.3163	0.0295112	0.00093024
ENSMUSG00000021763	BC067074	2981.3	89.1931	0.0299175	6.02276e-62
ENSMUSG00000078169	Gm16499	15.91	0.477076	0.0299859	2.05024e-06
ENSMUSG00000052105	1110012J17Rik	4227.61	129.032	0.0305213	2.0761e-157
ENSMUSG00000040289	Hey1	7717.06	238.049	0.0308471	1.34125e-215
ENSMUSG00000054061	Gm9934	248.47	7.67622	0.030894	1.11598e-13
ENSMUSG00000024909	Efemp2	1983.83	61.4152	0.030958	2.89232e-26
ENSMUSG00000001555	Fkbp10	2230.75	70.0079	0.0313832	1.8394e-106
ENSMUSG00000043385	Olfr267	15.3323	0.482452	0.0314663	3.85988e-06
ENSMUSG00000019933	2310015B20Rik	211.591	6.71132	0.0317183	5.62553e-09
ENSMUSG00000008575	Nfib	16038.5	528.523	0.0329534	3.44061e-112
ENSMUSG00000037016	Frem2	15751.9	520.836	0.033065	3.78815e-240
ENSMUSG00000020811	Wscd1	7393.61	246.025	0.0332754	3.55011e-29
ENSMUSG00000027574	Nkain4	2034.34	68.1104	0.0334803	1.14653e-106
ENSMUSG00000034522	Zfp395	5363.9	184.68	0.0344301	4.928e-181
ENSMUSG00000067586	S1pr3	15718.5	551.664	0.0350966	1.95802e-100
ENSMUSG00000027489	Necab3	640.093	22.5623	0.0352486	1.38073e-51
ENSMUSG00000044807	Zfp354c	1911.17	68.0566	0.0356099	9.95528e-103
ENSMUSG00000053441	Adamts19	836.164	30.2063	0.0361249	5.30704e-16
ENSMUSG00000029838	Ptn	1445.83	52.2701	0.0361522	1.49038e-61
ENSMUSG00000031772	Cntnap4	766.925	27.8156	0.0362689	2.13103e-57
ENSMUSG00000037034	Pax1	43654	1594.11	0.0365169	3.18013e-226
ENSMUSG00000005696	Sh2d1a	260.774	9.58453	0.0367542	1.3638e-08
ENSMUSG00000000753	Serpinf1	4614.45	170.807	0.0370156	6.83568e-112
ENSMUSG00000020473	Aebp1	4086.49	152.045	0.0372067	6.32225e-95
ENSMUSG00000019539	Rcn3	2352.22	87.7081	0.0372873	4.64155e-126
ENSMUSG00000037260	Hgsnat	20552.9	772.318	0.0375771	3.37564e-233
ENSMUSG00000041731	Pgm5	9777.6	368.292	0.0376669	5.82817e-211
ENSMUSG00000021068	Nin	17887.1	676.021	0.0377938	1.10226e-153
ENSMUSG00000030849	Fgfr2	12462.9	485.988	0.0389946	3.06801e-60
ENSMUSG00000007480	Mc5r	73.1633	2.87858	0.0393447	5.4738e-16
ENSMUSG00000051678	Pcdhb6	12.0229	0.477076	0.0396805	3.88665e-05
ENSMUSG00000061311	Rag1	7921.98	323.743	0.0408664	6.23417e-17
ENSMUSG00000046402	Rbp1	4035.57	167.022	0.0413875	6.89184e-67
ENSMUSG00000027488	Snta1	799.786	33.1172	0.0414075	4.11664e-58
ENSMUSG00000039982	Dtx4	5514.71	228.352	0.0414077	2.98735e-169
ENSMUSG00000044921	Rassf9	697.244	29.3059	0.0420311	2.18711e-43
ENSMUSG00000022454	Nell2	3000.61	126.299	0.0420911	5.64415e-122
ENSMUSG00000038576	Susd4	3051.78	128.55	0.0421229	1.86594e-125
ENSMUSG00000030352	Tspan9	7753.39	328.325	0.042346	7.18307e-185
ENSMUSG00000048572	E030010A14Rik	1429.15	60.9112	0.0426205	9.66173e-57
ENSMUSG00000016386	Mpped2	1368.49	59.0298	0.0431349	3.04202e-85
ENSMUSG00000054263	Lifr	22282.1	962.315	0.0431878	4.84512e-17
ENSMUSG00000034910	Pygo1	2219.07	96.8586	0.0436483	4.93987e-116
ENSMUSG00000030088	Aldh1l1	12781.4	560.691	0.0438676	8.84114e-77
ENSMUSG00000002799	Jag2	16506.3	730.244	0.0442403	1.6195e-53
ENSMUSG00000043259	Fam13c	562.13	24.9854	0.0444476	8.46772e-22
ENSMUSG00000024143	Rhoq	4625.2	206.272	0.0445974	4.66324e-158
ENSMUSG00000063605	Ccdc102a	910.044	41.2705	0.0453499	2.15191e-57
ENSMUSG00000062760	1810041L15Rik	10935.3	511.054	0.0467342	2.77228e-194
ENSMUSG00000024640	Psat1	20792.3	974.183	0.046853	2.54869e-210
ENSMUSG00000022676	Snai2	2472.93	116.618	0.0471577	1.38425e-30
ENSMUSG00000032318	Isl2	381.441	18.2257	0.0477811	2.79067e-40
ENSMUSG00000022464	Slc38a4	3245.53	155.888	0.0480317	2.41288e-48
ENSMUSG00000056870	Gulp1	745.147	36.0011	0.0483141	8.99151e-59
ENSMUSG00000028669	1110049F12Rik	23634.7	1143.77	0.0483937	1.14539e-44
ENSMUSG00000050967	Creg2	832.087	40.3271	0.0484649	9.85456e-53
ENSMUSG00000031563	Wwc2	2716.89	132.404	0.0487337	3.05314e-116
ENSMUSG00000001281	Itgb7	1906.84	93.0957	0.048822	8.27389e-84
ENSMUSG00000040209	Zfp704	4623.49	225.869	0.0488526	9.09123e-77
ENSMUSG00000058145	Adamts17	1659.18	81.5438	0.0491471	1.58719e-17
ENSMUSG00000074505	Fat3	2641.94	130.925	0.0495563	1.32168e-15
ENSMUSG00000024299	Adamts10	3549.4	176.575	0.0497477	8.02915e-121
ENSMUSG00000042116	Vwa1	2168.7	107.923	0.0497638	1.79406e-139
ENSMUSG00000050288	Fzd2	1974.46	98.3328	0.0498024	8.90869e-117
ENSMUSG00000033763	Mtss1l	24852.6	1241.23	0.0499436	1.19292e-201
ENSMUSG00000000305	Cdh4	26690.1	1336.97	0.0500924	3.34878e-204
ENSMUSG00000071770	Rhox4e	9.56653	0.482452	0.0504313	0.000363945
ENSMUSG00000080907	4930455H04Rik	9.56653	0.482452	0.0504313	0.000368569
ENSMUSG00000047842	Diras2	8927.67	450.453	0.0504558	7.52251e-144
ENSMUSG00000041734	Kirrel	3904.96	197.239	0.05051	7.82708e-22
ENSMUSG00000040183	Ankrd6	4198.21	212.479	0.0506118	4.55802e-81
ENSMUSG00000053044	Cd8b1	1243.26	63.8436	0.0513516	4.17669e-07
ENSMUSG00000021198	Unc79	4888.54	251.337	0.0514136	8.40593e-120
ENSMUSG00000018217	Pmp22	1497.36	77.7433	0.0519203	9.80095e-73
ENSMUSG00000034732	Pabpc5	82.962	4.31519	0.052014	6.67907e-16
ENSMUSG00000061576	Dpp6	4951.04	258.665	0.0522447	5.47221e-25
ENSMUSG00000056174	Col8a2	1888.96	99.2762	0.052556	3.53212e-77
ENSMUSG00000033192	Lpcat2	3977.36	212.072	0.0533197	1.61318e-42
ENSMUSG00000078129	1700007I08Rik	44.6959	2.39613	0.0536096	1.02337e-10
ENSMUSG00000053647	Gpr30	1662.43	89.2039	0.0536587	2.61104e-43
ENSMUSG00000066797	Zfp648	529.808	28.7697	0.0543021	4.52417e-40
ENSMUSG00000025911	Adhfe1	1629.73	88.7106	0.0544327	2.31042e-52
ENSMUSG00000049409	Prokr1	279.939	15.3363	0.0547844	8.77355e-30
ENSMUSG00000043496	Tril	717.191	39.3514	0.0548688	2.19056e-27
ENSMUSG00000006567	Atp7b	4005.82	220.257	0.0549844	1.18082e-117
ENSMUSG00000079587	Gpr45	321.726	17.7486	0.0551668	1.54895e-32
ENSMUSG00000045934	Mtmr11	3171.2	175.583	0.055368	3.83792e-56
ENSMUSG00000024085	Man2a1	37669.9	2094.14	0.0555919	5.96978e-87
ENSMUSG00000029769	Ccdc136	2617.48	146.32	0.055901	1.00595e-96
ENSMUSG00000014725	Adam28	1853.4	104.658	0.0564684	6.89513e-16
ENSMUSG00000022178	Jub	6379.07	361.731	0.0567059	2.67464e-84
ENSMUSG00000047067	Dusp28	2421.5	138.237	0.0570872	4.13645e-20
ENSMUSG00000040875	Osbpl10	5554.39	317.539	0.0571691	1.41172e-151
ENSMUSG00000034685	Fam171a2	551.845	31.6322	0.0573207	1.06393e-17
ENSMUSG00000024211	Grm8	656.575	37.9094	0.0577381	6.09518e-45
ENSMUSG00000090747	Gm17495	24.8773	1.4366	0.0577476	7.95379e-07
ENSMUSG00000024593	Megf10	1242.7	71.9431	0.0578927	4.02406e-31
ENSMUSG00000024538	Ppic	4030.48	235.127	0.0583373	3.88472e-131
ENSMUSG00000039607	Rbms3	6091.45	356.869	0.0585852	3.0931e-54
ENSMUSG00000015396	Cd83	28759.4	1703.92	0.0592473	6.02406e-37
ENSMUSG00000047692	4930533K18Rik	178.033	10.5709	0.0593762	1.13015e-23
ENSMUSG00000069171	Nr2f1	1215.24	72.9779	0.060052	2.10527e-59
ENSMUSG00000016918	Sulf1	13642	821.328	0.060206	3.26461e-92
ENSMUSG00000028386	Slc46a2	26439.2	1596.65	0.0603895	2.10144e-157
ENSMUSG00000038725	Pkhd1l1	19460.6	1200.39	0.0616832	6.14206e-15
ENSMUSG00000020646	Mboat2	1081.29	67.6279	0.0625436	2.2415e-58
ENSMUSG00000053977	Cd8a	2469.92	155.53	0.0629694	4.84665e-09
ENSMUSG00000075592	Nynrin	3706.11	234.661	0.0633174	1.91414e-75
ENSMUSG00000075324	Fign	257.092	16.3335	0.0635317	1.14334e-27
ENSMUSG00000003477	Inmt	1540.61	98.3597	0.0638445	9.08288e-17
ENSMUSG00000036225	Kctd1	5526.54	354.929	0.0642225	5.00015e-146
ENSMUSG00000046275	Tusc5	1218.92	78.6598	0.0645323	4.27449e-56
ENSMUSG00000052759	Gpr25	934.441	60.4288	0.0646684	9.11534e-28
ENSMUSG00000034021	Pds5b	70434.6	4562.55	0.064777	7.22481e-110
ENSMUSG00000036298	Slc2a13	9247.29	601.099	0.0650027	1.0402e-26
ENSMUSG00000028487	Bnc2	523.61	34.0767	0.0650802	1.03571e-40
ENSMUSG00000023411	Nfatc4	205.415	13.4173	0.0653177	3.52316e-25
ENSMUSG00000036036	Zfp57	894.221	58.5151	0.0654369	2.50254e-51
ENSMUSG00000020261	Slc36a1	27885	1826.25	0.0654923	9.69757e-176
ENSMUSG00000019718	2810055F11Rik	358.798	23.5488	0.0656323	2.90873e-34
ENSMUSG00000026187	Xrcc5	7803.8	512.585	0.0656841	2.57017e-108
ENSMUSG00000090441	Gm17651	58.4465	3.84349	0.0657608	2.23036e-12
ENSMUSG00000070858	Gm1673	546.5	35.9796	0.0658364	1.77449e-05
ENSMUSG00000040432	Ltb4r2	218.275	14.3768	0.0658655	9.11978e-12
ENSMUSG00000073176	Zfp449	851.345	56.1082	0.0659054	4.34045e-52
ENSMUSG00000002058	Unc119	3340.87	220.718	0.0660662	6.43837e-40
ENSMUSG00000074518	Gm10711	7.21807	0.477076	0.0660946	0.00297024
ENSMUSG00000027016	Zfp385b	1071.94	71.0427	0.0662748	1.28798e-54
ENSMUSG00000053897	Slc39a8	2861.99	190.019	0.066394	2.07002e-97
ENSMUSG00000049576	Zfa	7.1749	0.477076	0.0664924	0.00305392
ENSMUSG00000046908	Ltb4r1	338.315	22.5408	0.0666267	5.24761e-10
ENSMUSG00000052957	Gas1	1095.88	73.8837	0.0674196	4.2315e-09
ENSMUSG00000029913	Prdm5	367.723	24.9424	0.0678293	3.25108e-37
ENSMUSG00000054679	Srsf12	693.292	47.033	0.0678401	4.48117e-43
ENSMUSG00000027386	Fbln7	631.017	43.2164	0.0684868	1.80922e-40
ENSMUSG00000033377	Palmd	352.487	24.4599	0.0693923	5.94309e-28
ENSMUSG00000038903	Ccdc68	582.985	40.7773	0.0699456	4.76449e-43
ENSMUSG00000038540	Tmc3	2692.6	188.571	0.0700333	1.30091e-32
ENSMUSG00000050910	Cdr2l	3617.42	255.132	0.0705289	1.50296e-112
ENSMUSG00000020792	Exoc7	30695.2	2168.22	0.0706371	4.86413e-165
ENSMUSG00000089715	Cbx6	27927.6	1980.09	0.0709009	2.0353e-163
ENSMUSG00000022816	Fstl1	14221.6	1010.37	0.0710445	1.49037e-165
ENSMUSG00000026478	Lamc1	17514.4	1250.39	0.0713921	3.90136e-136
ENSMUSG00000022591	Gm9747	954.206	68.1319	0.0714016	1.69544e-57
ENSMUSG00000051790	Nlgn2	2776.29	199.453	0.0718415	2.20555e-14
ENSMUSG00000021127	Zfp36l1	17209.9	1241.92	0.0721631	1.55975e-19
ENSMUSG00000036880	Acaa2	3301.62	239.378	0.0725031	1.80994e-109
ENSMUSG00000026748	Plxdc2	6957.77	505.773	0.0726919	1.87988e-142
ENSMUSG00000041633	Kctd12b	908.199	66.1967	0.0728879	5.93705e-35
ENSMUSG00000037892	Pcdh18	2225.93	162.557	0.0730288	2.9986e-42
ENSMUSG00000038351	Sgsm2	5124.78	374.596	0.0730951	8.44239e-131
ENSMUSG00000056031	9330154J02Rik	65.1949	4.79226	0.0735068	5.97443e-13
ENSMUSG00000025038	Efhc2	266.291	19.6623	0.0738374	4.26815e-27
ENSMUSG00000014329	Bicc1	2187.54	161.705	0.0739207	3.31697e-76
ENSMUSG00000047712	Ust	2926.67	217.32	0.0742548	4.66269e-92
ENSMUSG00000024940	Ltbp3	13081.9	972.999	0.0743775	2.70026e-38
ENSMUSG00000048826	Dact2	23373.5	1742.75	0.0745609	2.2867e-16
ENSMUSG00000049532	Sall2	500.395	37.4055	0.0747518	4.58916e-22
ENSMUSG00000026090	2010300C02Rik	6830.42	513.353	0.0751569	2.43975e-136
ENSMUSG00000042943	4922501L14Rik	681.431	51.3321	0.0753298	2.24255e-41
ENSMUSG00000016982	Pom121l2	63.5104	4.79226	0.0754564	1.64638e-12
ENSMUSG00000022206	Npr3	355.705	26.9313	0.0757125	4.11874e-30
ENSMUSG00000039883	Lrrc17	2309.03	175.422	0.075972	4.5162e-104
ENSMUSG00000042359	Osbpl6	4843.64	368.615	0.0761028	1.92153e-57
ENSMUSG00000032372	Plscr2	609.995	46.5237	0.0762689	1.55375e-38
ENSMUSG00000055612	Cdca7	1549.28	118.381	0.0764103	1.50236e-37
ENSMUSG00000038152	5033430I15Rik	179.766	13.8943	0.0772912	9.3296e-23
ENSMUSG00000035274	Tpbg	1910.16	148.271	0.0776226	5.46896e-84
ENSMUSG00000061013	Mkx	678.823	52.8009	0.077783	2.13877e-45
ENSMUSG00000009292	Trpm2	15692.2	1227.75	0.0782394	5.98458e-156
ENSMUSG00000090919	Pabpc4l	575.956	45.0763	0.0782634	4.29724e-44
ENSMUSG00000072623	Zfp9	893.552	70.0832	0.0784321	1.44455e-31
ENSMUSG00000026980	Ly75	57656.7	4531.26	0.0785903	3.24097e-138
ENSMUSG00000073174	Magi2	18.1721	1.43123	0.0787597	9.60037e-06
ENSMUSG00000029153	Ociad2	9323.69	739.635	0.0793286	1.9098e-147
ENSMUSG00000047746	Fbxo40	434.758	34.5376	0.079441	3.68572e-31
ENSMUSG00000049109	Themis	1127.07	89.7186	0.0796036	4.0787e-15
ENSMUSG00000033767	D930015E06Rik	91438.8	7298.75	0.0798211	3.28388e-113
ENSMUSG00000090206	Tepp	957.051	76.7569	0.0802014	4.65015e-47
ENSMUSG00000046169	Adamts6	643.144	51.6909	0.0803722	1.00242e-08
ENSMUSG00000028758	Kif17	511.922	41.2328	0.0805452	1.53195e-34
ENSMUSG00000031290	Lrch2	2850.98	231.268	0.0811187	1.82718e-70
ENSMUSG00000060559	Gm10083	106.263	8.625	0.0811667	1.89776e-16
ENSMUSG00000033149	Phldb2	2315.93	188.48	0.0813842	2.73743e-36
ENSMUSG00000023055	Calcoco1	21702.7	1774.83	0.081779	5.89101e-153
ENSMUSG00000039081	Zfp503	2312.21	189.44	0.0819302	2.33483e-84
ENSMUSG00000038886	Man2a2	6546.58	538.606	0.0822728	7.81116e-40
ENSMUSG00000047473	Zfp30	483.806	39.807	0.0822788	8.67547e-36
ENSMUSG00000025014	Dntt	1789.02	147.425	0.0824054	9.74321e-06
ENSMUSG00000021589	Rhobtb3	1693.91	139.619	0.0824245	9.59782e-56
ENSMUSG00000052331	Ankrd44	5859.25	483.179	0.0824642	2.06585e-121
ENSMUSG00000022665	Ccdc80	6515.66	540.365	0.0829332	9.84883e-52
ENSMUSG00000061104	Gm10094	11.4885	0.954152	0.083053	0.000283394
ENSMUSG00000022912	Pros1	3926.51	326.358	0.0831165	1.22403e-99
ENSMUSG00000020846	Fam101b	2031.02	168.952	0.083186	3.22787e-25
ENSMUSG00000027748	Trpc4	103.866	8.65726	0.0833503	1.72396e-09
ENSMUSG00000031298	Gpr64	4527.1	377.426	0.0833705	7.71486e-21
ENSMUSG00000041308	Sntb2	4453.52	372.238	0.0835827	2.38726e-18
ENSMUSG00000038205	Prkab2	3686.59	309.027	0.0838247	6.3236e-42
ENSMUSG00000039236	Isg20	15459.7	1296.08	0.0838357	7.34843e-106
ENSMUSG00000023972	Ptk7	8312.63	697.356	0.0838912	7.1903e-111
ENSMUSG00000027796	Smad9	1040.76	87.3117	0.0838919	6.06574e-51
ENSMUSG00000030047	Arhgap25	805.164	67.5903	0.083946	1.24985e-48
ENSMUSG00000038668	Lpar1	5469.89	460.991	0.084278	1.59847e-88
ENSMUSG00000062929	Cfl2	6290.35	531.541	0.0845011	7.0468e-132
ENSMUSG00000071771	Rhox4b	39.4861	3.35028	0.0848471	8.19962e-09
ENSMUSG00000028373	Astn2	1791.7	152.608	0.0851751	2.38576e-11
ENSMUSG00000024957	Kcnk4	196.513	16.7837	0.0854075	9.2199e-11
ENSMUSG00000027227	Sord	6712.03	573.636	0.085464	2.47026e-125
ENSMUSG00000021474	Sfxn1	7270.39	636.101	0.0874921	1.19637e-129
ENSMUSG00000040219	Ttc12	1586.37	139.191	0.0877414	4.7254e-65
ENSMUSG00000042428	Mgat3	12161.8	1068	0.0878157	2.24796e-49
ENSMUSG00000005973	Rcn1	15973.9	1405.19	0.087968	3.72705e-145
ENSMUSG00000063887	Nlgn1	2611.39	229.82	0.088007	5.55541e-84
ENSMUSG00000049288	Lix1l	2996.5	265.258	0.0885227	4.4299e-99
ENSMUSG00000048078	Odz4	9562.69	849.772	0.0888633	1.48532e-85
ENSMUSG00000078161	BC007180	2276.82	202.412	0.0889014	1.39948e-45
ENSMUSG00000027634	Ndrg3	35623.5	3167.09	0.0889046	1.25201e-138
ENSMUSG00000013076	Amotl1	27851.9	2480.45	0.0890587	7.84768e-56
ENSMUSG00000038128	Camk4	17367.8	1547.66	0.0891111	4.78805e-64
ENSMUSG00000032864	Rag2	215.77	19.2336	0.0891391	6.30945e-23
ENSMUSG00000013419	Zfp651	2176.64	194.382	0.0893038	5.26351e-65
ENSMUSG00000024600	Slc27a6	316.737	28.2873	0.0893084	5.46864e-29
ENSMUSG00000057614	Gnai1	1379.2	123.307	0.0894052	4.16018e-58
ENSMUSG00000000861	Bcl11a	2964.91	266.261	0.089804	9.92655e-74
ENSMUSG00000032649	Glt25d2	660.284	59.4585	0.0900499	2.16843e-17
ENSMUSG00000003849	Nqo1	16411.9	1478.28	0.0900735	8.94519e-143
ENSMUSG00000042340	Ctf1	1287.93	116.108	0.0901509	8.61731e-58
ENSMUSG00000028402	Mpdz	2466.11	223.532	0.0906419	5.45711e-75
ENSMUSG00000002808	Epdr1	1002.25	91.1444	0.0909399	5.19688e-52
ENSMUSG00000032827	Ppp1r9a	2229.03	203.849	0.0914519	1.05025e-23
ENSMUSG00000028037	Ifi44	4344.64	399.958	0.0920578	7.4489e-15
ENSMUSG00000048376	F2r	2798.85	259.946	0.0928759	6.45143e-92
ENSMUSG00000002900	Lamb1	21559.7	2007.58	0.0931173	7.499e-67
ENSMUSG00000078903	Gm14391	20.5853	1.91906	0.0932246	0.00126154
ENSMUSG00000026430	Rassf5	7274.84	680.139	0.0934919	1.04565e-123
ENSMUSG00000020376	Rnf130	2611.61	244.728	0.0937076	2.06446e-89
ENSMUSG00000030510	Lass3	2378.87	223.233	0.0938399	1.48627e-40
ENSMUSG00000027173	Depdc7	617.98	58.0273	0.0938983	1.37059e-35
ENSMUSG00000047749	Zc3hav1l	742.264	70.0563	0.094382	1.60482e-43
ENSMUSG00000034854	Mfsd12	18803.3	1800.61	0.0957605	4.50093e-13
ENSMUSG00000055485	9830001H06Rik	3160.22	302.974	0.0958712	4.16567e-70
ENSMUSG00000025129	Ppp1r27	2675.49	256.639	0.0959221	8.76607e-73
ENSMUSG00000040296	Ddx58	7609.38	731.209	0.0960931	2.86999e-22
ENSMUSG00000017764	Zswim1	4384.53	422.418	0.0963429	2.72279e-31
ENSMUSG00000078235	Fam43b	168.942	16.3281	0.0966493	1.00412e-18
ENSMUSG00000002732	Fkbp7	222.583	21.5813	0.0969583	5.04596e-24
ENSMUSG00000038552	Fndc4	251.602	24.5137	0.0974305	2.11705e-20
ENSMUSG00000078896	Gm8923	14.7979	1.44198	0.097445	0.000133638
ENSMUSG00000044461	Shisa2	11000.9	1072.56	0.0974975	1.0931e-133
ENSMUSG00000028179	Cth	4660.79	458.719	0.0984209	7.07716e-98
ENSMUSG00000027955	Fam198b	688.622	68.0942	0.0988848	4.95941e-37
ENSMUSG00000074140	Zfp319	1819.38	179.989	0.0989289	1.07078e-62
ENSMUSG00000069986	Gm8054	9.6097	0.954152	0.0992904	0.00139039
ENSMUSG00000045659	Plekha7	10984.9	1092.61	0.099465	1.1779e-104
ENSMUSG00000078922	Tgtp1	757.381	75.3794	0.0995264	2.16408e-09
ENSMUSG00000078875	Gm14419	19.1978	1.91368	0.0996821	1.6091e-05
ENSMUSG00000033059	Pygb	15197.6	1516.47	0.0997837	6.33819e-133
ENSMUSG00000030737	Slco2b1	4588.03	459.137	0.100073	9.83635e-97
ENSMUSG00000018378	Cuedc1	5296.83	531.588	0.10036	6.14927e-93
ENSMUSG00000038074	Fkbp14	649.163	65.2318	0.100486	4.02552e-36
ENSMUSG00000036856	Wnt4	17415.4	1756.22	0.100843	4.40847e-25
ENSMUSG00000037211	Spry1	2026.89	204.46	0.100874	8.74541e-48
ENSMUSG00000043557	Mdga1	2586.37	260.959	0.100898	2.0046e-31
ENSMUSG00000026594	Ralgps2	7454.62	752.758	0.100979	1.44136e-118
ENSMUSG00000009739	Pou6f1	1412.95	142.868	0.101113	3.28899e-65
ENSMUSG00000030742	Lat	1183.98	120.016	0.101367	4.78714e-07
ENSMUSG00000055980	Irs1	2052.08	208.705	0.101704	3.85832e-77
ENSMUSG00000037111	Setd7	10778.1	1096.34	0.101719	5.81183e-30
ENSMUSG00000078670	Fam174b	2269.55	231.289	0.10191	7.96915e-50
ENSMUSG00000013089	Etv5	2970.23	302.723	0.101919	2.16849e-79
ENSMUSG00000050592	Fam78a	385.451	39.3783	0.102162	1.37408e-05
ENSMUSG00000042156	Dzip1	1928.13	197.7	0.102535	2.26016e-72
ENSMUSG00000034614	Pik3ip1	3570	366.958	0.102789	1.39622e-83
ENSMUSG00000029330	Cds1	14179.8	1459.7	0.102942	3.39924e-129
ENSMUSG00000032456	Nmnat3	1074.91	110.731	0.103015	2.7683e-47
ENSMUSG00000028801	4930555I21Rik	563.393	58.1025	0.10313	1.15134e-21
ENSMUSG00000021448	Shc3	445.863	46.0358	0.103251	5.91079e-28
ENSMUSG00000024087	Cyp1b1	2886.89	298.15	0.103277	7.5825e-72
ENSMUSG00000070390	Nlrp1b	3810.32	394.328	0.10349	2.34634e-09
ENSMUSG00000042439	Zfp532	1384.99	143.414	0.103549	2.9069e-16
ENSMUSG00000038630	Zkscan16	59.9635	6.245	0.104147	6.46031e-11
ENSMUSG00000037086	1110059M19Rik	868.739	90.748	0.104459	1.45737e-29
ENSMUSG00000000085	Scmh1	4470.76	467.017	0.10446	1.62285e-106
ENSMUSG00000029204	Rhoh	495.202	51.8253	0.104655	6.27914e-30
ENSMUSG00000046152	Fut10	452.38	47.4187	0.104821	1.02504e-32
ENSMUSG00000043461	1110032A04Rik	1280.46	134.479	0.105024	2.88041e-32
ENSMUSG00000057060	Slc35f3	296.367	31.1336	0.105051	7.01057e-22
ENSMUSG00000038702	Dsel	1319.42	139.555	0.10577	9.70548e-52
ENSMUSG00000059898	Dsc3	22210.6	2352.17	0.105903	6.68e-125
ENSMUSG00000040867	Begain	473.516	50.4209	0.106482	1.9267e-29
ENSMUSG00000022793	B4galt4	733.82	78.172	0.106527	8.73823e-41
ENSMUSG00000030513	Pcsk6	2440.72	260.927	0.106906	1.01867e-68
ENSMUSG00000033855	Ston1	354.28	37.904	0.106989	3.65688e-25
ENSMUSG00000028523	Tctex1d1	62.7816	6.72207	0.107071	1.22211e-10
ENSMUSG00000022378	Fam49b	10894.3	1166.59	0.107083	4.66519e-18
ENSMUSG00000054723	Vmac	3385.41	362.824	0.107173	6.42498e-91
ENSMUSG00000079434	Neu2	1079.03	115.647	0.107177	8.16636e-29
ENSMUSG00000079639	Rhox4a	294.737	31.6537	0.107396	1.87383e-24
ENSMUSG00000017667	Zfp334	679.746	73.8245	0.108606	2.70295e-38
ENSMUSG00000020234	4930404N11Rik	5635.61	612.78	0.108733	4.28958e-10
ENSMUSG00000016087	Fli1	123.587	13.4441	0.108783	7.38681e-05
ENSMUSG00000053110	Yap1	10001	1088.27	0.108816	1.61477e-121
ENSMUSG00000022438	Parvb	3488.42	379.849	0.108889	4.5598e-83
ENSMUSG00000019831	Wasf1	756.225	83.018	0.10978	6.73943e-37
ENSMUSG00000045318	Adra2c	542.716	60.0108	0.110575	1.20176e-28
ENSMUSG00000040483	Xaf1	2450.77	272.093	0.111024	1.27573e-24
ENSMUSG00000017314	Mpp2	1481.06	164.567	0.111115	1.53667e-49
ENSMUSG00000034310	Tmem132d	362.54	40.3056	0.111176	9.96893e-25
ENSMUSG00000027784	Ppm1l	10223.4	1137.28	0.111242	2.0865e-118
ENSMUSG00000025887	Casp12	1406.37	156.939	0.111592	4.19477e-24
ENSMUSG00000021318	Gli3	4497.1	502.54	0.111748	1.61303e-22
ENSMUSG00000078887	Gm6710	51.4011	5.75179	0.1119	8.35937e-10
ENSMUSG00000042712	Wbp5	4536.45	507.815	0.111941	1.53217e-36
ENSMUSG00000001123	Lgals9	24933.9	2834.39	0.113676	2.56923e-116
ENSMUSG00000000794	Kcnn3	1955.8	222.347	0.113686	4.32203e-67
ENSMUSG00000031328	Flna	82579.9	9421.06	0.114084	2.72689e-57
ENSMUSG00000031613	Hpgd	11169.4	1274.84	0.114137	8.38216e-38
ENSMUSG00000027932	Slc27a3	1748.86	199.679	0.114177	1.00628e-15
ENSMUSG00000054034	Tceal5	58.684	6.72207	0.114547	4.90682e-10
ENSMUSG00000037463	Fbxo27	112.536	12.9348	0.114939	9.0338e-13
ENSMUSG00000000253	Gmpr	6369.18	732.484	0.115004	1.19502e-60
ENSMUSG00000027408	Cpxm1	1704.66	196.113	0.115045	6.4887e-57
ENSMUSG00000046733	Gprc5a	1063.52	122.396	0.115086	1.91998e-41
ENSMUSG00000028024	Enpep	8129.36	937.615	0.115337	4.49473e-107
ENSMUSG00000024353	2010001M09Rik	87.1729	10.0777	0.115606	2.80974e-12
ENSMUSG00000024601	Isoc1	5048.45	584.116	0.115702	4.92848e-100
ENSMUSG00000043183	4732471D19Rik	679.827	78.6705	0.115721	9.18065e-40
ENSMUSG00000017737	Mmp9	19237	2231.49	0.116	2.35138e-115
ENSMUSG00000030725	Lipt2	82.3033	9.58453	0.116454	8.39971e-13
ENSMUSG00000034903	Cobll1	7036.4	819.652	0.116487	9.3041e-47
ENSMUSG00000030562	Nox4	164.467	19.1906	0.116684	4.55545e-08
ENSMUSG00000054196	Cthrc1	151.882	17.7378	0.116787	7.7993e-06
ENSMUSG00000052512	Nav2	48737.1	5695.19	0.116855	2.89217e-22
ENSMUSG00000032035	Ets1	4081.65	478.295	0.117182	1.29957e-52
ENSMUSG00000019966	Kitl	10022.2	1178.03	0.117542	2.47035e-113
ENSMUSG00000064326	Siva1	1162.65	136.698	0.117574	7.63023e-48
ENSMUSG00000001435	Col18a1	20626	2436.21	0.118113	2.32877e-115
ENSMUSG00000060268	Gm1661	129.942	15.3524	0.118149	1.00802e-15
ENSMUSG00000070509	Rgma	1497.74	177.529	0.118531	4.20719e-18
ENSMUSG00000021209	Ppp4r4	768.264	91.182	0.118686	2.10234e-26
ENSMUSG00000050064	Zfp697	916.869	108.92	0.118796	9.98442e-38
ENSMUSG00000047986	Palm3	1283.59	152.646	0.118921	4.7491e-42
ENSMUSG00000020620	Abca8b	378.952	45.1193	0.119063	3.32138e-17
ENSMUSG00000031274	Col4a5	3931.22	470.667	0.119726	6.14994e-83
ENSMUSG00000049929	Lpar4	72.1107	8.64113	0.119831	0.00058159
ENSMUSG00000075318	Scn2a1	380.129	45.5803	0.119907	3.56362e-25
ENSMUSG00000026012	Cd28	717.84	86.4274	0.120399	3.25852e-35
ENSMUSG00000063160	Numbl	629.144	75.8081	0.120494	1.05431e-36
ENSMUSG00000067818	Myl9	690.295	83.4306	0.120862	2.61406e-38
ENSMUSG00000028583	Pdpn	2122.5	257.475	0.121307	6.01252e-51
ENSMUSG00000035245	A130022J15Rik	4398.01	534.854	0.121613	6.85031e-99
ENSMUSG00000043384	Gprasp1	6704.35	817.631	0.121955	4.20388e-103
ENSMUSG00000002289	Angptl4	337.549	41.2866	0.122313	7.38127e-18
ENSMUSG00000000290	Itgb2	2038.74	250.04	0.122644	6.97748e-55
ENSMUSG00000003227	Edar	1277.19	156.681	0.122676	2.25179e-54
ENSMUSG00000001761	Smo	4985.07	611.846	0.122736	1.78727e-100
ENSMUSG00000078878	Gm14305	50.5481	6.22349	0.12312	5.80665e-09
ENSMUSG00000039057	Myo16	2776.37	342.021	0.12319	1.2146e-65
ENSMUSG00000030782	Tgfb1i1	961.343	118.574	0.123342	1.26122e-59
ENSMUSG00000090843	Gm17673	27.2905	3.36641	0.123355	4.88974e-06
ENSMUSG00000090399	Nav1	213.373	26.4112	0.123779	2.42328e-19
ENSMUSG00000060487	Samd5	778.052	96.3815	0.123875	4.61187e-34
ENSMUSG00000052496	Pkdrej	19.2842	2.39076	0.123975	5.24056e-05
ENSMUSG00000027160	Ccdc34	3477.89	432.607	0.124388	5.06721e-82
ENSMUSG00000029669	Tspan12	1229.97	153.492	0.124794	3.19887e-48
ENSMUSG00000022758	P2rx6	541.285	67.5903	0.12487	2.03847e-18
ENSMUSG00000051242	Pcdhb9	34.5518	4.32056	0.125046	5.61046e-05
ENSMUSG00000074220	Zfp382	514.001	64.2776	0.125054	8.53892e-24
ENSMUSG00000038738	Shank1	1603.12	200.665	0.125172	2.81469e-16
ENSMUSG00000032093	Cd3e	547.342	69.0215	0.126103	2.60131e-06
ENSMUSG00000007989	Fzd3	1125.85	141.989	0.126117	2.55828e-43
ENSMUSG00000025551	Fgf14	16061.4	2025.87	0.126133	1.57063e-23
ENSMUSG00000032094	Cd3d	665.768	84.0098	0.126185	2.79459e-05
ENSMUSG00000020844	Nxn	15364.6	1945.41	0.126617	4.89874e-83
ENSMUSG00000051098	Mblac2	1235.07	156.446	0.12667	3.27123e-45
ENSMUSG00000031434	Morc4	1828.1	231.996	0.126906	1.25213e-46
ENSMUSG00000091890	A830073O21Rik	234.46	29.7669	0.126959	6.52818e-13
ENSMUSG00000087444	Gm5475	128.381	16.3066	0.127017	2.1413e-14
ENSMUSG00000038526	Car14	583.412	74.3769	0.127486	1.88885e-29
ENSMUSG00000035293	G2e3	1128.13	143.935	0.127587	2.10699e-23
ENSMUSG00000063455	D630045J12Rik	1120.5	143.371	0.127953	7.49465e-45
ENSMUSG00000034761	Map4k5	5105.61	655.754	0.128438	1.49966e-29
ENSMUSG00000048794	Ccdc37	244.508	31.6859	0.129591	8.20951e-14
ENSMUSG00000026004	1110028C15Rik	3596.52	466.18	0.12962	1.54938e-23
ENSMUSG00000027314	Dll4	17634.6	2288.05	0.129748	1.45775e-40
ENSMUSG00000070436	Serpinh1	9567.56	1242.27	0.129842	7.45951e-107
ENSMUSG00000023885	Thbs2	7092.34	923.134	0.130159	2.25059e-34
ENSMUSG00000019917	Sept10	2790.08	364.009	0.130465	4.44902e-41
ENSMUSG00000023942	Slc29a1	10144.1	1324.02	0.13052	2.48522e-80
ENSMUSG00000046027	Stard5	5819.29	760.595	0.130702	3.97151e-96
ENSMUSG00000034751	Mast4	22271.5	2919.75	0.131098	4.57451e-21
ENSMUSG00000029270	Fam69a	4078.41	535.818	0.131379	6.49776e-86
ENSMUSG00000039959	Hip1	1082.6	142.417	0.131551	3.07177e-16
ENSMUSG00000002059	Rab34	2393.48	315.626	0.131869	1.03827e-68
ENSMUSG00000034993	Vat1	7595.92	1002	0.131913	3.69961e-44
ENSMUSG00000040329	Il7	12087.7	1596.55	0.132081	2.61069e-106
ENSMUSG00000042035	Igsf3	9886.76	1308.19	0.132317	9.92993e-89
ENSMUSG00000034813	Grip1	1499.47	198.692	0.132508	2.55187e-17
ENSMUSG00000046743	Fat4	2779.79	369.203	0.132817	2.22172e-36
ENSMUSG00000022364	Wdr67	2639.43	350.791	0.132904	2.37758e-70
ENSMUSG00000021482	1110018J18Rik	3657.57	486.926	0.133128	8.81505e-83
ENSMUSG00000062115	Rai1	4116.36	549.107	0.133396	1.03875e-61
ENSMUSG00000024598	Fbn2	704.154	94.4893	0.134188	2.70816e-21
ENSMUSG00000046879	Irgm1	12247.6	1645.94	0.134389	0.00468591
ENSMUSG00000022309	Angpt1	1651.17	222.675	0.134859	4.08296e-53
ENSMUSG00000026657	Frmd4a	8628.91	1164.21	0.13492	3.65285e-48
ENSMUSG00000020160	Meis1	6368.94	859.522	0.134955	3.22117e-39
ENSMUSG00000053477	Tcf4	10314.2	1395.43	0.135291	8.68747e-74
ENSMUSG00000051236	Msrb3	2951.11	400.477	0.135704	3.65178e-79
ENSMUSG00000045877	4933415A04Rik	246.818	33.5566	0.135957	1.17836e-19
ENSMUSG00000045636	Mtus1	2861.03	389.15	0.136018	5.3311e-66
ENSMUSG00000057751	Megf6	15713.4	2140.27	0.136207	3.80537e-63
ENSMUSG00000055538	Zcchc24	1039.1	141.587	0.13626	3.4288e-13
ENSMUSG00000032531	Amotl2	5384.24	733.804	0.136287	7.23429e-11
ENSMUSG00000033752	Mnd1	622.267	84.808	0.136289	9.64218e-31
ENSMUSG00000024525	Impa2	692.52	94.4409	0.136373	3.27145e-33
ENSMUSG00000056758	Hmga2	154.711	21.115	0.13648	3.06361e-13
ENSMUSG00000033720	Sfxn5	1790.06	244.728	0.136715	2.41942e-47
ENSMUSG00000062604	Srpk2	11703.3	1600.02	0.136716	8.43969e-103
ENSMUSG00000024134	Six2	4930.59	674.912	0.136883	1.41088e-79
ENSMUSG00000040649	Rimklb	2062.37	282.465	0.136962	1.72986e-07
ENSMUSG00000033420	Antxr1	2898.03	399.137	0.137727	6.76716e-12
ENSMUSG00000091526	Gm6494	31.3071	4.31519	0.137834	2.24171e-06
ENSMUSG00000020814	Mxra7	313.104	43.1841	0.137923	9.38771e-21
ENSMUSG00000058056	Palld	7618.53	1051.22	0.137983	9.04923e-98
ENSMUSG00000031937	2200002K05Rik	284.831	39.3138	0.138025	9.97223e-20
ENSMUSG00000054893	Zfp667	437.037	60.5094	0.138454	3.04446e-17
ENSMUSG00000006931	Leprel4	945.227	131.011	0.138602	3.27512e-23
ENSMUSG00000007379	Dennd2c	4632.34	642.059	0.138603	2.6321e-52
ENSMUSG00000044033	Ccdc141	2949.04	411.08	0.139395	8.81372e-18
ENSMUSG00000045826	Ptprcap	268.569	37.4539	0.139457	1.80573e-06
ENSMUSG00000026730	Pter	896.375	125.151	0.139619	8.79715e-36
ENSMUSG00000036256	Igfbp7	843.97	118.017	0.139835	1.19698e-31
ENSMUSG00000021238	Aldh6a1	3521.61	493.079	0.140015	2.71082e-52
ENSMUSG00000009418	Nav1	9005.07	1262.29	0.140176	1.28716e-35
ENSMUSG00000019960	Dusp6	3230.64	453.032	0.14023	6.84263e-14
ENSMUSG00000037605	Lphn3	1437.77	202.01	0.140502	1.80344e-50
ENSMUSG00000051652	Lrrc3	980.179	137.754	0.14054	1.7629e-39
ENSMUSG00000021286	Zfyve21	4341.19	611.016	0.140749	1.30721e-79
ENSMUSG00000031327	Chic1	940.424	132.469	0.140861	3.69836e-29
ENSMUSG00000070713	Gm10282	37.3915	5.27472	0.141067	1.64384e-07
ENSMUSG00000046109	AB041806	54.3704	7.6816	0.141283	1.26225e-08
ENSMUSG00000037410	Tbc1d2b	15786	2241.21	0.141974	4.44171e-100
ENSMUSG00000029287	Tgfbr3	6740.25	957.534	0.142062	8.02933e-33
ENSMUSG00000053985	Zfp14	218.626	31.182	0.142627	9.90194e-18
ENSMUSG00000068979	Gm5848	6.68362	0.954152	0.14276	0.0154736
ENSMUSG00000023094	Msrb2	264.396	37.904	0.143361	8.87004e-20
ENSMUSG00000049321	Zfp2	234.093	33.5781	0.143439	1.1209e-19
ENSMUSG00000021756	Il6st	10964	1576.58	0.143796	2.31351e-21
ENSMUSG00000003541	Ier3	3911.89	562.633	0.143826	8.66394e-07
ENSMUSG00000032766	Gng11	173.299	24.9585	0.14402	5.91711e-16
ENSMUSG00000020335	Zfp354b	59.9635	8.64113	0.144106	2.09871e-09
ENSMUSG00000031451	Gas6	77552.6	11187.9	0.144263	2.22219e-69
ENSMUSG00000001521	Tulp3	12194.1	1761.25	0.144435	2.29211e-98
ENSMUSG00000056214	Pard6g	10031.8	1449.12	0.144453	1.57536e-97
ENSMUSG00000041120	Nbl1	2102.22	304.117	0.144664	6.05107e-37
ENSMUSG00000053113	Socs3	18510.5	2683.28	0.14496	5.55051e-05
ENSMUSG00000025104	Hdgfrp3	3344.48	485.344	0.145118	1.50236e-37
ENSMUSG00000058173	BC017612	1238.83	179.823	0.145155	1.88739e-39
ENSMUSG00000032135	Mcam	772.539	112.265	0.145319	3.60798e-19
ENSMUSG00000039197	Adk	1924.58	280.53	0.145762	6.8204e-56
ENSMUSG00000029299	Abcg3	263.187	38.3865	0.145853	4.68197e-07
ENSMUSG00000022637	Cblb	2087.63	305.297	0.14624	1.09215e-17
ENSMUSG00000042155	Klhl23	1054.47	154.339	0.146366	1.05598e-43
ENSMUSG00000015476	Prrt1	243.757	35.9742	0.147582	0.000274642
ENSMUSG00000037712	Fermt2	5574.55	823.125	0.147657	2.1049e-61
ENSMUSG00000038141	Tmem181a	742.258	109.804	0.147933	5.67631e-31
ENSMUSG00000046550	Spin2	152.341	22.5462	0.147998	4.60854e-15
ENSMUSG00000079608	Stard6	71.0686	10.5279	0.148137	3.87549e-10
ENSMUSG00000018537	Pcgf2	4406.65	652.876	0.148157	9.57128e-64
ENSMUSG00000030217	Art4	406.388	60.3911	0.148605	3.06185e-11
ENSMUSG00000015879	Fam184b	90.0774	13.4011	0.148774	4.45347e-07
ENSMUSG00000045876	Pcdhb8	9.6097	1.44198	0.150055	0.0164953
ENSMUSG00000026639	Lamb3	10159	1527.73	0.150382	7.10473e-21
ENSMUSG00000049115	Agtr1a	79.6742	11.9914	0.150506	2.06838e-10
ENSMUSG00000029312	Klhl8	3241.55	488.084	0.150571	1.70381e-69
ENSMUSG00000058447	Zfp82	267.733	40.3163	0.150584	4.20825e-16
ENSMUSG00000031070	Mrgprf	108.12	16.2958	0.15072	3.5321e-14
ENSMUSG00000033581	Igf2bp2	1759.25	265.393	0.150856	2.77624e-46
ENSMUSG00000038058	Nod1	400.563	60.461	0.15094	1.69859e-08
ENSMUSG00000004105	Angptl2	8214.64	1244.44	0.15149	7.05978e-93
ENSMUSG00000005054	Cstb	57496.8	8712.18	0.151525	1.61643e-72
ENSMUSG00000036459	Wtip	759.496	115.111	0.151563	7.71071e-22
ENSMUSG00000062175	Tgif2	2801.67	425.114	0.151736	3.66923e-51
ENSMUSG00000022054	Nefm	6059.96	922.321	0.152199	9.99006e-57
ENSMUSG00000074896	Ifit3	1663.01	253.509	0.152439	1.42202e-08
ENSMUSG00000032013	Trim29	24314.1	3711.43	0.152645	7.95417e-88
ENSMUSG00000033355	Rtp4	1669.98	255.412	0.152943	1.81917e-24
ENSMUSG00000047976	Kcna1	1309.91	200.943	0.153403	3.83388e-39
ENSMUSG00000019789	Hey2	333.943	51.3482	0.153763	9.01293e-06
ENSMUSG00000091032	Gm17299	6.21392	0.959528	0.154416	0.0233629
ENSMUSG00000069601	Ank3	26744.1	4157.07	0.155439	3.60498e-88
ENSMUSG00000040711	Sh3pxd2b	4533.33	705.381	0.155599	8.04205e-21
ENSMUSG00000078861	Zfp931	375.972	58.5205	0.155651	4.10583e-22
ENSMUSG00000058297	Spock2	32165.1	5007.01	0.155666	5.85037e-86
ENSMUSG00000056296	Synpr	687.324	107.049	0.155748	0.0489979
ENSMUSG00000030555	Ttc23	3709.29	578.906	0.156069	3.08e-75
ENSMUSG00000024423	Impact	8390.46	1311.23	0.156276	1.58632e-87
ENSMUSG00000025036	Sfxn2	2196.64	344.08	0.156639	1.24232e-54
ENSMUSG00000026395	Ptprc	3025.74	474.672	0.156878	5.91293e-27
ENSMUSG00000030060	8430410A17Rik	1238.48	194.312	0.156896	4.89721e-42
ENSMUSG00000032374	Plod2	1861.3	292.538	0.157168	1.77998e-09
ENSMUSG00000031851	Ntpcr	652.942	102.643	0.1572	2.9052e-31
ENSMUSG00000059708	Akap17b	1315.76	207.194	0.157471	1.0651e-41
ENSMUSG00000055254	Ntrk2	505.671	80.1287	0.15846	1.96241e-24
ENSMUSG00000043300	B3galnt1	1271.52	201.56	0.158519	1.61113e-42
ENSMUSG00000017760	Ctsa	27440.8	4351.89	0.158592	6.02565e-87
ENSMUSG00000021665	Hexb	14068.4	2232.91	0.158718	6.56491e-78
ENSMUSG00000025555	Farp1	9521.65	1515.88	0.159203	4.56999e-88
ENSMUSG00000023030	Slc11a2	5953.47	950.56	0.159665	5.47338e-80
ENSMUSG00000018672	Copz2	3893.59	622.638	0.159914	1.77613e-74
ENSMUSG00000046897	Zfp740	9470.26	1516.88	0.160173	4.79892e-88
ENSMUSG00000055172	C1ra	447.98	72.3987	0.161612	3.15596e-05
ENSMUSG00000029314	Agpat9	701.4	113.61	0.161976	2.67146e-28
ENSMUSG00000054863	Fam19a5	1039.11	168.802	0.162448	4.21887e-35
ENSMUSG00000034881	Tbxa2r	100.411	16.3227	0.16256	7.07917e-11
ENSMUSG00000035606	Ky	799.706	130.324	0.162965	3.35103e-32
ENSMUSG00000042826	Fgf11	1365.21	222.809	0.163205	1.81521e-31
ENSMUSG00000047821	Trim16	762.271	124.733	0.163634	1.97918e-27
ENSMUSG00000020142	Slc1a4	3901.22	639.126	0.163827	4.43647e-17
ENSMUSG00000048677	Tpcn2	4037.76	662.084	0.163973	4.30961e-58
ENSMUSG00000020774	Aspa	61.4589	10.0777	0.163975	2.14875e-08
ENSMUSG00000030275	Etnk1	17931.4	2943.11	0.164132	5.02651e-27
ENSMUSG00000051036	Ttc24	382.401	62.7658	0.164136	5.22123e-10
ENSMUSG00000028268	Gbp3	4232.78	694.811	0.16415	1.07506e-10
ENSMUSG00000024900	Cpt1a	22451.8	3686.53	0.164198	1.8606e-86
ENSMUSG00000024026	Glo1	3743.63	614.928	0.16426	3.99405e-71
ENSMUSG00000090290	Gm17296	1956.14	321.367	0.164286	3.0246e-46
ENSMUSG00000006369	Fbln1	2180.74	358.37	0.164334	5.24002e-63
ENSMUSG00000063760	Rnf217	629.031	103.645	0.16477	2.50634e-28
ENSMUSG00000017491	Rarb	416.419	68.6197	0.164785	8.53536e-07
ENSMUSG00000058571	Gpc6	659.453	108.866	0.165086	1.06834e-27
ENSMUSG00000033590	Myo5c	2097.87	346.395	0.165118	1.18159e-46
ENSMUSG00000024070	Prkd3	3192.39	528.029	0.165403	3.72565e-68
ENSMUSG00000032503	Arpp21	938.609	155.395	0.165559	1.8047e-13
ENSMUSG00000029860	Zyx	5353.4	888.014	0.165878	6.97828e-81
ENSMUSG00000038271	Iffo1	1242.44	206.229	0.165987	2.05486e-43
ENSMUSG00000047344	Lancl3	485.22	80.5573	0.166022	6.13668e-25
ENSMUSG00000026736	4930426L09Rik	40.3823	6.70594	0.166061	3.66953e-07
ENSMUSG00000035472	Slc25a21	464.824	77.2554	0.166204	2.16467e-23
ENSMUSG00000027378	Nphp1	3236.5	538.209	0.166294	1.13164e-64
ENSMUSG00000020122	Egfr	10060.2	1673.58	0.166357	6.29903e-72
ENSMUSG00000036832	Lpar3	803.533	133.851	0.166579	1.80976e-27
ENSMUSG00000073988	Ttpa	166.923	27.8209	0.166669	1.70577e-07
ENSMUSG00000051579	Tceal8	2370.19	395.256	0.166761	4.7926e-61
ENSMUSG00000028496	Mllt3	896.132	149.67	0.167018	3.54774e-34
ENSMUSG00000022947	Cbr3	1244.58	207.896	0.167042	2.11005e-38
ENSMUSG00000040841	Six5	908.911	152.104	0.167348	2.77695e-30
ENSMUSG00000048503	Tmem136	217.854	36.4836	0.167468	4.73481e-13
ENSMUSG00000025931	Paqr8	771.033	129.536	0.168004	2.41644e-29
ENSMUSG00000029510	Gpc2	746.664	125.65	0.168282	0.00267793
ENSMUSG00000029366	Dck	1890.72	318.199	0.168295	6.06149e-52
ENSMUSG00000059493	Nhs	1382.59	232.764	0.168353	2.30299e-09
ENSMUSG00000038248	Sobp	414.178	70.0402	0.169106	3.35691e-07
ENSMUSG00000091764	Zfp964	59.4722	10.067	0.169272	1.89763e-08
ENSMUSG00000025265	Fgd1	1615.17	273.449	0.169301	5.35055e-50
ENSMUSG00000054134	Umodl1	1723.27	293.171	0.170124	6.50394e-39
ENSMUSG00000029406	Pitpnm2	2216.07	377.116	0.170173	7.54212e-34
ENSMUSG00000021066	Atl1	439.59	74.8432	0.170257	7.85043e-22
ENSMUSG00000046561	Arsj	42.2179	7.1884	0.170269	2.24635e-07
ENSMUSG00000037206	Islr	960.566	163.581	0.170296	6.52597e-27
ENSMUSG00000031503	Col4a2	31278.8	5333.68	0.170521	9.09278e-47
ENSMUSG00000004891	Nes	3596.08	614.505	0.170882	7.03452e-60
ENSMUSG00000033436	Armcx2	4386	749.718	0.170934	3.42201e-72
ENSMUSG00000032816	Igdcc4	9579.41	1639.67	0.171166	2.56083e-28
ENSMUSG00000022120	Rnf219	1654.09	283.398	0.171331	4.74255e-45
ENSMUSG00000049281	Scn3b	755.463	129.456	0.171359	6.68923e-49
ENSMUSG00000053080	2700081O15Rik	5657.72	969.606	0.171378	2.0197e-45
ENSMUSG00000047428	Dlk2	1544.25	264.862	0.171515	1.87648e-26
ENSMUSG00000042099	Kank3	945.428	162.198	0.17156	6.97752e-31
ENSMUSG00000053644	Aldh7a1	6477.1	1111.29	0.171573	2.00728e-77
ENSMUSG00000022475	Hdac7	7136.77	1225.12	0.171663	6.5669e-57
ENSMUSG00000035158	Mitf	912.318	156.848	0.171922	1.94232e-17
ENSMUSG00000057058	Skap1	479.729	82.5893	0.172158	3.17172e-09
ENSMUSG00000050989	Sepn1	1894.12	327.97	0.173152	1.47065e-54
ENSMUSG00000089798	1700028K03Rik	193.739	33.5674	0.173261	8.30156e-05
ENSMUSG00000023043	Krt18	215096	37281.4	0.173325	3.02012e-34
ENSMUSG00000057469	E2f6	1010.26	175.133	0.173355	3.58586e-35
ENSMUSG00000025268	Maged2	5289.31	917.388	0.173442	3.61745e-73
ENSMUSG00000017499	Cdc6	596.606	103.527	0.173526	1.42306e-28
ENSMUSG00000059049	Frem1	334.472	58.0488	0.173553	3.15777e-17
ENSMUSG00000051343	Rab11fip5	3488.43	605.457	0.173561	9.22561e-62
ENSMUSG00000050394	Armcx6	737.162	128.019	0.173665	4.59942e-29
ENSMUSG00000037148	Arhgap10	2154.97	374.259	0.173673	3.6286e-55
ENSMUSG00000003500	Impdh1	1684.18	292.844	0.173879	7.7385e-44
ENSMUSG00000052085	Dock8	7524.28	1309.23	0.174001	2.05965e-76
ENSMUSG00000023235	Ccl25	104276	18206.9	0.174604	4.30682e-26
ENSMUSG00000062373	Tmem65	4759.22	831.959	0.17481	6.11576e-72
ENSMUSG00000039133	9330171B17Rik	27.2905	4.77614	0.175011	1.7503e-05
ENSMUSG00000029781	Fkbp9	8088.51	1417.73	0.175277	3.63706e-79
ENSMUSG00000048772	Tmem53	645.518	113.267	0.175467	2.70616e-26
ENSMUSG00000041117	Ccdc8	5799.96	1018.92	0.175676	7.9526e-56
ENSMUSG00000052479	A330008L17Rik	403.916	71.0212	0.175832	9.94409e-18
ENSMUSG00000038046	Rnmtl1	851.587	150.212	0.17639	4.68755e-29
ENSMUSG00000038578	Susd1	348.001	61.4367	0.176542	1.9351e-18
ENSMUSG00000024556	Me2	9324.71	1646.8	0.176606	3.61258e-80
ENSMUSG00000040710	St8sia4	111.197	19.673	0.17692	1.5103e-11
ENSMUSG00000037325	Bbs7	2010.19	355.738	0.176967	1.38967e-47
ENSMUSG00000071547	Nt5dc2	1147.75	203.296	0.177126	3.26722e-35
ENSMUSG00000031112	2610018G03Rik	4777.8	846.415	0.177156	2.77977e-39
ENSMUSG00000027803	Wwtr1	2032.62	360.225	0.177222	9.72619e-32
ENSMUSG00000061039	Olfr920	506.61	89.8207	0.177298	1.20184e-13
ENSMUSG00000026000	Lancl1	9538.73	1692.79	0.177465	1.34843e-79
ENSMUSG00000043154	Ppp2r3a	2173.19	386.213	0.177717	1.26135e-17
ENSMUSG00000040857	Erf	1428.2	253.916	0.177788	1.17796e-17
ENSMUSG00000028545	Bend5	582.273	103.645	0.178001	8.81021e-26
ENSMUSG00000048701	Ccdc6	15555.8	2776.55	0.178489	8.88991e-81
ENSMUSG00000054412	Gm4793	144.831	25.8858	0.178731	4.77885e-11
ENSMUSG00000031714	Gab1	6690.76	1196.93	0.178893	1.56531e-35
ENSMUSG00000026189	Pecr	844.077	151.15	0.179071	4.21149e-29
ENSMUSG00000039396	Neil3	351.262	62.9109	0.1791	4.96424e-21
ENSMUSG00000031099	Smarca1	897.401	160.788	0.179171	1.1057e-30
ENSMUSG00000038070	Cntln	2515.29	451.16	0.179367	5.69866e-31
ENSMUSG00000032563	Mrpl3	6397.11	1147.43	0.179368	2.81331e-74
ENSMUSG00000046179	E2f8	1248.2	223.945	0.179415	3.55662e-38
ENSMUSG00000038884	A230050P20Rik	3446.99	619.796	0.179808	8.27256e-22
ENSMUSG00000060961	Slc4a4	4684.66	842.814	0.179909	2.06884e-22
ENSMUSG00000069184	Zfp72	71.9217	12.9509	0.18007	2.58303e-09
ENSMUSG00000030757	Zkscan2	82.3628	14.87	0.180543	2.37318e-09
ENSMUSG00000040998	Npnt	12615.4	2278.22	0.180591	1.26169e-79
ENSMUSG00000051950	B3galtl	1192.38	215.363	0.180617	1.04677e-34
ENSMUSG00000091124	Gm17239	5.27454	0.954152	0.180898	0.0530715
ENSMUSG00000037580	Gch1	3106.6	565.425	0.182008	3.54483e-54
ENSMUSG00000037636	Slc25a43	217.865	39.7908	0.18264	9.18184e-15
ENSMUSG00000032194	Kank2	4650.82	849.579	0.182673	3.57903e-48
ENSMUSG00000002033	Cd3g	904.008	165.168	0.182706	1.74308e-17
ENSMUSG00000078867	Gm14418	348.87	63.7683	0.182785	2.45208e-18
ENSMUSG00000036545	Adamts2	5565.44	1017.87	0.182891	3.58765e-68
ENSMUSG00000024691	Fam111a	382.823	70.0832	0.18307	1.09638e-21
ENSMUSG00000000409	Lck	2637.19	483.184	0.183219	6.53106e-12
ENSMUSG00000048232	Fbxo10	6559.9	1206.02	0.183848	7.23016e-74
ENSMUSG00000038836	Agbl3	482.435	88.7268	0.183915	2.98762e-22
ENSMUSG00000031872	Bean1	143.568	26.4327	0.184113	1.43789e-11
ENSMUSG00000031342	Gpm6b	2237.26	412.559	0.184404	1.27464e-23
ENSMUSG00000050323	2310030N02Rik	605.584	111.691	0.184435	6.61901e-24
ENSMUSG00000023008	Fmnl3	4933.3	913.776	0.185226	9.27516e-67
ENSMUSG00000021193	Pitrm1	11494.2	2131.64	0.185454	3.11286e-77
ENSMUSG00000061048	Cdh3	7997.8	1484.84	0.185656	4.19091e-61
ENSMUSG00000029185	Fam114a1	2188.84	406.646	0.185781	4.62994e-51
ENSMUSG00000020315	Spnb2	47747.4	8870.75	0.185785	2.72444e-52
ENSMUSG00000044707	Ccnjl	1613.25	299.844	0.185863	9.79493e-42
ENSMUSG00000059713	Rcan3	1988.33	371.637	0.186909	1.67812e-49
ENSMUSG00000043614	Vps37d	422.708	79.1315	0.187201	3.73414e-19
ENSMUSG00000040681	Hmgn1	16320	3055.16	0.187203	1.37341e-74
ENSMUSG00000051674	Dcun1d4	1455.07	272.398	0.187206	3.28697e-40
ENSMUSG00000046618	Olfml2a	6739.32	1262.89	0.187391	7.01645e-53
ENSMUSG00000010660	Plcd1	3468.4	649.965	0.187396	6.15599e-56
ENSMUSG00000090665	Gad1-ps	7.623	1.43123	0.187751	0.0206273
ENSMUSG00000054072	Iigp1	14391.3	2705.62	0.188005	0.00579638
ENSMUSG00000016534	Lamp2	65163.4	12274.8	0.18837	1.9641e-54
ENSMUSG00000089736	Gm14378	241.625	45.6018	0.18873	1.62502e-08
ENSMUSG00000029672	Fam3c	2035.08	384.475	0.188924	7.09706e-49
ENSMUSG00000069729	Arid1b	19161.9	3620.19	0.188926	5.25083e-75
ENSMUSG00000078877	Gm14295	73.4603	13.932	0.189653	4.59626e-09
ENSMUSG00000032411	Tfdp2	4892.5	927.901	0.189658	2.903e-55
ENSMUSG00000056900	Usp13	356.477	67.6333	0.189727	2.24291e-17
ENSMUSG00000001911	Nfix	16499.3	3130.84	0.189756	6.8624e-75
ENSMUSG00000028385	Snx30	10354.3	1966.74	0.189944	6.97402e-49
ENSMUSG00000029276	Glmn	737.832	140.482	0.190399	2.03225e-19
ENSMUSG00000020102	Slc16a7	445.178	84.8457	0.190588	1.12577e-21
ENSMUSG00000058443	Rpl10-ps3	75.2959	14.3553	0.190652	1.94031e-08
ENSMUSG00000031749	St3gal2	2286.83	436.269	0.190775	1.18865e-26
ENSMUSG00000000325	Arvcf	3849.69	734.57	0.190813	3.57776e-61
ENSMUSG00000056679	Gpr173	260.893	49.8524	0.191084	4.25183e-14
ENSMUSG00000021959	Lats2	1668.35	319.094	0.191263	2.80171e-27
ENSMUSG00000020284	1810043G02Rik	1658.3	317.652	0.191552	7.4434e-20
ENSMUSG00000028019	Pdgfc	505.648	96.8801	0.191596	4.41301e-22
ENSMUSG00000003559	As3mt	2047.84	393.213	0.192014	1.516e-47
ENSMUSG00000039481	Nrtn	604.812	116.515	0.192648	1.12133e-12
ENSMUSG00000028218	Fam92a	2763.71	532.978	0.192849	3.46448e-56
ENSMUSG00000067071	Hes6	13784.9	2663.41	0.193212	2.09067e-24
ENSMUSG00000026131	Dst	61283.3	11862.7	0.193572	3.68605e-21
ENSMUSG00000074521	Gm14327	17.3622	3.36104	0.193583	0.000888786
ENSMUSG00000062866	Phactr2	1756.83	340.53	0.193833	2.32876e-43
ENSMUSG00000037643	Prkci	9554	1858.49	0.194525	7.08683e-73
ENSMUSG00000026411	Tmem9	2170.95	423.527	0.195088	2.66124e-49
ENSMUSG00000022951	Rcan1	5808.4	1133.81	0.195203	9.83256e-23
ENSMUSG00000062488	I830012O16Rik	534.737	104.664	0.195729	3.5879e-08
ENSMUSG00000038648	Creb3l2	13461.9	2636.69	0.195863	4.86712e-73
ENSMUSG00000042302	Ehbp1	1517.52	297.362	0.195953	1.28777e-23
ENSMUSG00000052698	Tln2	3344.96	655.872	0.196078	1.82758e-54
ENSMUSG00000046480	Scn4b	6207.62	1218.28	0.196255	1.42276e-39
ENSMUSG00000037653	Kctd8	92.6365	18.2364	0.19686	4.05994e-09
ENSMUSG00000018377	Vezf1	8106.79	1596.77	0.196967	7.66622e-62
ENSMUSG00000061731	Ext1	2859.16	563.297	0.197015	2.11311e-54
ENSMUSG00000037747	Phyhipl	301.291	59.5015	0.197488	5.29033e-16
ENSMUSG00000091428	Gm17507	427.741	84.4922	0.197531	0.011798
ENSMUSG00000018417	Myo1b	8467.9	1672.85	0.197552	1.30721e-71
ENSMUSG00000021311	Mtr	1344.89	266.014	0.197796	5.503e-40
ENSMUSG00000070526	Peg12	179.021	35.5025	0.198315	3.52589e-13
ENSMUSG00000029162	Khk	604.31	119.93	0.198458	4.36432e-23
ENSMUSG00000042426	Dhx29	8153.93	1619.52	0.198619	4.62386e-58
ENSMUSG00000030313	Dennd5b	2490.42	494.65	0.198621	1.50605e-19
ENSMUSG00000046312	AI464131	895.759	178.001	0.198715	1.07216e-26
ENSMUSG00000036782	Klhl13	1623.58	322.792	0.198815	3.23184e-29
ENSMUSG00000036580	Spg20	3173.28	631.412	0.198978	4.27328e-55
ENSMUSG00000078868	Gm14412	43.4543	8.65188	0.199103	0.000140643
ENSMUSG00000024246	Thumpd2	550.906	109.836	0.199374	2.89895e-21
ENSMUSG00000078984	Gm11027	4.78326	0.954152	0.199477	0.0785198
ENSMUSG00000015305	Sash1	2732.41	546.1	0.19986	2.71948e-28
ENSMUSG00000072066	6720489N17Rik	16.7846	3.36104	0.200245	0.000913922
ENSMUSG00000092335	Gm7221	21.4815	4.30444	0.200379	0.00203387
ENSMUSG00000022112	Gpc5	239.643	48.0355	0.200446	3.33892e-14
ENSMUSG00000060988	Galnt13	258.431	51.8306	0.200559	3.16043e-14
ENSMUSG00000057329	Bcl2	4383.51	879.554	0.200651	1.14324e-62
ENSMUSG00000038594	Gm9766	69.3141	13.9105	0.200687	1.04978e-05
ENSMUSG00000031661	Nkd1	551.311	110.844	0.201056	2.16403e-20
ENSMUSG00000010122	Slc47a1	1273.37	256.221	0.201215	3.20314e-22
ENSMUSG00000080727	C920021L13Rik	257.448	51.8091	0.201241	1.02443e-14
ENSMUSG00000025260	Hsd17b10	3199.97	644.294	0.201344	8.46908e-55
ENSMUSG00000078144	Capns2	293.258	59.0459	0.201344	8.68956e-06
ENSMUSG00000035392	Dennd1a	3091.71	623.162	0.201559	7.10948e-53
ENSMUSG00000066090	Insl5	19.0251	3.83811	0.201739	0.0414418
ENSMUSG00000020868	Xylt2	1169.29	235.909	0.201754	3.15091e-22
ENSMUSG00000027985	Lef1	845.292	170.758	0.202011	8.2606e-26
ENSMUSG00000063275	Ptpla	348.913	70.528	0.202136	8.00436e-18
ENSMUSG00000040181	Fmo1	11793.3	2384.73	0.20221	2.148e-53
ENSMUSG00000048481	Mypop	924.539	187.135	0.202409	2.04713e-13
ENSMUSG00000041592	Sdk2	1656.34	335.926	0.202813	6.85976e-09
ENSMUSG00000090100	Ttbk2	3148.63	638.847	0.202897	4.4957e-56
ENSMUSG00000020150	Gamt	134.639	27.3331	0.203011	1.22762e-11
ENSMUSG00000028633	Ctps	4748.54	964.807	0.20318	4.5125e-29
ENSMUSG00000017765	Slc12a4	4184.97	850.474	0.203221	2.0183e-38
ENSMUSG00000029103	Lrpap1	9530.26	1938.36	0.20339	5.19515e-69
ENSMUSG00000032184	Lysmd2	470.384	95.9098	0.203897	2.27069e-21
ENSMUSG00000033306	Lpp	13452.5	2743.39	0.203931	1.81386e-26
ENSMUSG00000038013	Wipf2	7267.02	1482.48	0.204	1.4719e-66
ENSMUSG00000040729	AK129341	2064.52	421.71	0.204266	2.68799e-28
ENSMUSG00000015653	Steap2	443.726	90.7319	0.204477	7.26966e-19
ENSMUSG00000044043	Pcdhb14	126.675	25.9234	0.204644	2.64535e-11
ENSMUSG00000029201	Ugdh	8198.73	1678.6	0.204739	2.73366e-67
ENSMUSG00000023341	Mx2	599.15	122.932	0.205178	0.0037021
ENSMUSG00000028270	Gbp2	5262.16	1080.74	0.20538	2.44763e-06
ENSMUSG00000060935	AI597468	2816.22	580.67	0.206188	8.39386e-52
ENSMUSG00000047996	Prrg1	590.808	122.256	0.206931	2.17061e-11
ENSMUSG00000024639	Gnaq	6398.16	1325.55	0.207177	2.43804e-65
ENSMUSG00000035069	Oma1	9542.19	1978.34	0.207326	1.51789e-67
ENSMUSG00000033565	Rbfox2	10814.1	2242.12	0.207333	2.0247e-68
ENSMUSG00000029070	Mxra8	418.049	86.7808	0.207585	6.24729e-17
ENSMUSG00000029163	Emilin1	212.504	44.1222	0.20763	3.74987e-13
ENSMUSG00000032249	Anp32a	5252.39	1090.69	0.207657	3.79594e-64
ENSMUSG00000018986	Slfn3	50.7803	10.5548	0.207852	1.45882e-06
ENSMUSG00000023927	Satb1	5518.06	1147.6	0.207972	1.16151e-26
ENSMUSG00000062661	Ncs1	1740.06	362.583	0.208374	1.64917e-41
ENSMUSG00000024059	Clip4	9392.75	1959.53	0.208622	1.8724e-67
ENSMUSG00000051817	Sox12	965.403	201.447	0.208666	8.26448e-29
ENSMUSG00000003534	Ddr1	14871.4	3108.14	0.209001	8.72743e-51
ENSMUSG00000046523	Kctd4	596.547	124.723	0.209074	3.51766e-28
ENSMUSG00000030067	Foxp1	2727.18	570.399	0.209153	1.68424e-51
ENSMUSG00000046317	BC107364	70.8959	14.8807	0.209896	6.85006e-08
ENSMUSG00000005131	4930550C14Rik	406.118	85.3174	0.21008	2.00617e-20
ENSMUSG00000039405	Prss23	141.5	29.7454	0.210214	8.84987e-09
ENSMUSG00000062257	Opcml	1659.7	349.284	0.21045	2.75836e-33
ENSMUSG00000038502	Ptov1	9752.68	2054.52	0.210663	1.08473e-47
ENSMUSG00000007827	Ankrd26	706.74	149.692	0.211806	1.68718e-16
ENSMUSG00000058761	Rnf169	2621.47	555.481	0.211896	1.5745e-48
ENSMUSG00000046805	Mpeg1	649.87	137.711	0.211905	2.48343e-12
ENSMUSG00000026581	Sell	163.03	34.5484	0.211914	2.4821e-05
ENSMUSG00000074364	Ehd2	809.018	171.745	0.212288	1.82231e-10
ENSMUSG00000020639	Pfn4	29.2988	6.22349	0.212415	7.75481e-05
ENSMUSG00000020808	Fam64a	516.317	109.723	0.212512	2.79016e-21
ENSMUSG00000022342	Kcnv1	83.2806	17.7056	0.212601	8.55302e-05
ENSMUSG00000036109	Mbnl3	3768.58	802.149	0.212852	2.33835e-28
ENSMUSG00000028497	Ptplad2	421.256	89.6917	0.212915	1.29816e-17
ENSMUSG00000055435	Maf	7395.4	1574.65	0.212923	1.83512e-63
ENSMUSG00000042258	Isl1	2777.72	591.889	0.213084	4.30312e-19
ENSMUSG00000010663	Fads1	1074.8	229.333	0.213372	4.6151e-37
ENSMUSG00000035305	Ror1	2634.42	562.996	0.213708	3.67161e-30
ENSMUSG00000016495	5033414D02Rik	11448.2	2449.58	0.213971	6.53828e-66
ENSMUSG00000036721	Zscan12	1121.04	239.941	0.214034	1.57919e-29
ENSMUSG00000060548	Tnfrsf19	2059.2	440.9	0.214112	2.59649e-36
ENSMUSG00000048040	Arxes2	356.131	76.2852	0.214205	1.45783e-16
ENSMUSG00000075593	Gal3st4	286.58	61.399	0.214248	5.97723e-10
ENSMUSG00000029426	Scarb2	7722.72	1655.19	0.214327	7.9533e-65
ENSMUSG00000038623	Tm6sf1	339.968	72.9026	0.21444	2.29096e-16
ENSMUSG00000031910	Has3	3069.7	659.635	0.214886	3.87345e-51
ENSMUSG00000078870	Gm14410	71.3061	15.3363	0.215077	9.16187e-08
ENSMUSG00000017734	Dbndd2	2201.94	474.071	0.215297	6.73311e-41
ENSMUSG00000050332	Fam123b	1163.41	250.866	0.215629	1.05236e-33
ENSMUSG00000028245	Nsmaf	12061.5	2604.34	0.215922	1.98435e-53
ENSMUSG00000024544	D18Ertd653e	462.227	99.8124	0.215938	5.0062e-20
ENSMUSG00000029392	Rilpl1	523.259	113.154	0.216249	1.96801e-20
ENSMUSG00000039345	Mettl22	356.849	77.1748	0.216267	7.55586e-13
ENSMUSG00000074994	Qser1	5068.02	1096.25	0.216308	1.38631e-34
ENSMUSG00000029705	Cux1	6733.62	1459.43	0.216738	5.7942e-63
ENSMUSG00000028760	Eif4g3	13556.3	2939.11	0.216807	6.9482e-65
ENSMUSG00000047767	Atg16l2	1847.56	401.083	0.217088	7.84374e-39
ENSMUSG00000030339	Ltbr	7008.06	1521.57	0.217117	7.83838e-19
ENSMUSG00000072964	Bhlhb9	5049.03	1096.9	0.217249	8.03171e-59
ENSMUSG00000024968	Rcor2	295.185	64.2884	0.21779	4.47097e-16
ENSMUSG00000022510	Trp63	18648.3	4062.08	0.217825	2.02149e-54
ENSMUSG00000034610	Zcchc11	4998.15	1088.74	0.217828	1.12957e-19
ENSMUSG00000030498	Gas2	698.61	152.185	0.217839	1.21603e-21
ENSMUSG00000049598	Vsig8	468.808	102.155	0.217903	1.38047e-18
ENSMUSG00000026727	Rsu1	2722.88	593.508	0.217971	7.86424e-51
ENSMUSG00000092443	CT009512.1	131.847	28.759	0.218123	4.6306e-10
ENSMUSG00000028576	Ift74	1924.94	421.104	0.218762	7.04571e-42
ENSMUSG00000001119	Col6a1	7902.82	1729.19	0.218806	0.0030098
ENSMUSG00000042046	Dstyk	4111.57	899.748	0.218833	7.00128e-55
ENSMUSG00000028521	Slc35d1	2145.45	469.643	0.218902	1.35558e-11
ENSMUSG00000025586	Cpeb1	1945.54	425.901	0.218911	3.58761e-38
ENSMUSG00000029249	Rest	3004.86	658.611	0.219182	1.15726e-51
ENSMUSG00000048756	Foxo3	12581.8	2759.54	0.219328	2.65311e-64
ENSMUSG00000024098	Twsg1	15212.2	3337.11	0.219371	3.73425e-63
ENSMUSG00000042961	Egflam	5336.73	1173.34	0.219861	1.1746e-55
ENSMUSG00000063415	Cyp26b1	1411.88	310.539	0.219947	1.08893e-28
ENSMUSG00000024924	Vldlr	1693.21	372.683	0.220104	4.3824e-37
ENSMUSG00000040836	Gpr161	400.849	88.2336	0.220117	5.33174e-18
ENSMUSG00000024944	Arl2	1305.18	287.317	0.220136	5.96497e-32
ENSMUSG00000022146	Osmr	4752.38	1047.28	0.220369	0.000120715
ENSMUSG00000068606	Gm4841	2807.33	618.777	0.220415	0.00348141
ENSMUSG00000020900	Myh10	7770.17	1715.84	0.220824	2.96349e-49
ENSMUSG00000039298	Cdk5rap2	10052.6	2220.86	0.220924	2.19238e-63
ENSMUSG00000021493	Pdlim7	2713.02	600.718	0.221421	2.52255e-48
ENSMUSG00000028541	B4galt2	156.039	34.5591	0.221478	1.49484e-11
ENSMUSG00000031506	Ptpn7	514.988	114.06	0.221481	3.35e-08
ENSMUSG00000035045	Zc3h12b	58.4465	12.9563	0.221678	8.3021e-07
ENSMUSG00000038065	2410066E13Rik	800.721	177.54	0.221725	6.24069e-23
ENSMUSG00000003992	Ssbp2	1325.72	294.265	0.221966	8.287e-34
ENSMUSG00000020395	Itk	693.853	154.307	0.222391	7.5336e-21
ENSMUSG00000041949	Tmco7	1226.92	272.876	0.222408	4.05243e-31
ENSMUSG00000078939	Gm11016	125.094	27.8317	0.222487	2.36536e-10
ENSMUSG00000036510	Cdh8	6210.23	1383.19	0.222728	1.48536e-40
ENSMUSG00000053916	Nanp	79.5662	17.7486	0.223067	4.17441e-08
ENSMUSG00000038543	BC028528	561.05	125.167	0.223095	4.59518e-19
ENSMUSG00000020884	Asgr1	174.017	38.8582	0.223301	9.45159e-11
ENSMUSG00000018547	Pip4k2b	1847.47	412.635	0.223352	1.37187e-39
ENSMUSG00000073295	Nudt11	497.286	111.295	0.223804	1.79301e-18
ENSMUSG00000035246	Pcyt1b	274.022	61.356	0.223909	8.76153e-15
ENSMUSG00000061758	Akr1b10	594.679	133.251	0.224072	4.81455e-23
ENSMUSG00000039328	Rnf122	1269.66	284.583	0.224141	0.000623643
ENSMUSG00000078349	AW011738	658.934	147.735	0.224203	1.06701e-14
ENSMUSG00000014303	Glis2	1399.55	314.076	0.224412	1.10805e-19
ENSMUSG00000020000	Moxd1	361.174	81.0989	0.224543	4.02347e-11
ENSMUSG00000054074	2810030E01Rik	623.384	140	0.22458	6.97046e-21
ENSMUSG00000062157	Il28ra	503.868	113.224	0.22471	0.0131031
ENSMUSG00000036995	Asap3	1799.84	404.727	0.224869	2.56919e-11
ENSMUSG00000030966	Trim21	2519.02	567.027	0.225098	1.31689e-44
ENSMUSG00000031227	Magee1	595.774	134.253	0.225343	1.29731e-16
ENSMUSG00000055633	Zfp580	142.483	32.1254	0.225469	5.00496e-11
ENSMUSG00000032788	Pdxk	5635.17	1273.62	0.226013	5.72487e-56
ENSMUSG00000006494	Pdk1	4608.26	1041.64	0.226037	1.40859e-54
ENSMUSG00000063145	Bbs5	793.875	179.453	0.226047	1.48876e-24
ENSMUSG00000048355	Arxes1	157.065	35.524	0.226175	1.8864e-10
ENSMUSG00000020096	Tbata	86649.6	19609.4	0.226307	2.28294e-40
ENSMUSG00000043313	Pcdhb19	125.007	28.2926	0.226328	5.66238e-07
ENSMUSG00000028587	Orc1	150.462	34.0928	0.226587	1.57004e-11
ENSMUSG00000050666	E130203B14Rik	243.207	55.1164	0.226624	4.05275e-15
ENSMUSG00000035901	Dennd5a	5041.53	1142.64	0.226645	6.92894e-57
ENSMUSG00000032925	Itgbl1	1604.88	363.758	0.226657	8.7435e-14
ENSMUSG00000060166	Zdhhc8	3541.8	803.168	0.226768	2.08319e-29
ENSMUSG00000037656	Slc20a2	2579.28	585.178	0.226877	1.47914e-46
ENSMUSG00000032898	Fbxo21	5589.03	1271.15	0.227438	1.20227e-56
ENSMUSG00000047227	Gm527	254.015	58.0488	0.228525	1.76226e-13
ENSMUSG00000084085	Gm16140	16.7414	3.82736	0.228616	0.00242369
ENSMUSG00000036928	Stag3	356.143	81.4792	0.228783	3.85761e-07
ENSMUSG00000071722	Spin4	144.675	33.101	0.228796	1.30028e-10
ENSMUSG00000035357	Pdzrn3	1626.56	372.806	0.2292	2.90435e-14
ENSMUSG00000025510	Cd151	5980.22	1374.07	0.229768	2.82596e-21
ENSMUSG00000024534	Sncaip	709.936	163.157	0.22982	2.5928e-13
ENSMUSG00000057541	Pus7	2289.82	526.496	0.229929	4.90538e-44
ENSMUSG00000019951	Uhrf1bp1l	4104.14	943.966	0.230003	2.75882e-52
ENSMUSG00000021265	Slc25a29	1111.55	255.679	0.23002	1.07625e-12
ENSMUSG00000037251	4930444A02Rik	1394.81	320.895	0.230063	2.22609e-31
ENSMUSG00000052560	Cpne8	1369.95	315.186	0.230072	2.30339e-18
ENSMUSG00000014773	Dll1	2086.57	480.456	0.230261	2.84412e-28
ENSMUSG00000032216	Nedd4	84118.6	19370.3	0.230274	1.46681e-33
ENSMUSG00000028207	Asph	7338.9	1690.83	0.230393	6.87426e-59
ENSMUSG00000031907	Zfp90	840.115	193.755	0.230629	6.11615e-28
ENSMUSG00000053199	Arhgap20	187.044	43.1573	0.230733	2.95271e-11
ENSMUSG00000031095	Cul4b	5307.17	1225.45	0.230904	3.69861e-36
ENSMUSG00000071073	Gm88	353.745	82.0047	0.231819	2.04545e-14
ENSMUSG00000046798	Cldn12	1408.83	327.247	0.232283	6.68082e-14
ENSMUSG00000044551	9930012K11Rik	272.343	63.2966	0.232415	1.75606e-14
ENSMUSG00000001995	Sipa1l2	8463.55	1969.65	0.232722	7.10535e-58
ENSMUSG00000030386	Zfp606	741.097	172.597	0.232894	2.01195e-24
ENSMUSG00000069117	Gm17352	20.5853	4.79764	0.233061	0.000844758
ENSMUSG00000070388	Fbxo39	14.3282	3.33953	0.233074	0.0104378
ENSMUSG00000031165	Was	215.883	50.3241	0.233108	1.18293e-06
ENSMUSG00000022372	Sla	1032.93	240.788	0.23311	2.25768e-16
ENSMUSG00000055932	Fto	5289.61	1236.21	0.233705	1.13498e-55
ENSMUSG00000060594	Layn	143.681	33.5889	0.233774	3.68408e-06
ENSMUSG00000046711	Hmga1	672.28	157.26	0.233921	6.23031e-22
ENSMUSG00000036615	Rfxap	1516.1	354.758	0.233994	2.73417e-33
ENSMUSG00000039309	Edaradd	1432.46	335.266	0.23405	2.56926e-33
ENSMUSG00000032231	Anxa2	22878	5357.17	0.234162	5.82569e-51
ENSMUSG00000046556	Zfp319	2990.63	700.665	0.234287	4.17846e-45
ENSMUSG00000030623	1700019G06Rik	32.6946	7.67085	0.234621	0.000125577
ENSMUSG00000034109	Golim4	4617.81	1084.35	0.234819	9.11164e-54
ENSMUSG00000054178	Gm9938	428.194	100.75	0.235292	3.2029e-17
ENSMUSG00000022837	Iqcb1	1690.41	398.601	0.235801	2.93215e-24
ENSMUSG00000053553	3110082I17Rik	569.04	134.237	0.235901	4.30756e-19
ENSMUSG00000037003	Tenc1	2060.54	486.122	0.23592	1.92999e-38
ENSMUSG00000071342	Gm889	22.3777	5.28009	0.235953	0.0159952
ENSMUSG00000032415	Ube2cbp	186.768	44.1329	0.236298	2.59211e-11
ENSMUSG00000002980	Bcam	4358.53	1031.03	0.236555	2.40599e-11
ENSMUSG00000025151	Maged1	24421.3	5785.07	0.236886	3.77293e-52
ENSMUSG00000071335	G630090E17Rik	406.793	96.4191	0.237023	7.38384e-15
ENSMUSG00000055053	Nfic	8202.67	1950.42	0.237779	1.39101e-57
ENSMUSG00000021262	Evl	4240.81	1010.75	0.238338	1.40323e-53
ENSMUSG00000000296	Tpd52l1	294.16	70.1262	0.238395	1.27326e-13
ENSMUSG00000020546	Stxbp4	1944.14	463.891	0.238611	2.83866e-38
ENSMUSG00000027387	Zc3h8	355.219	84.8618	0.2389	8.5283e-16
ENSMUSG00000020251	Glt8d2	329.138	78.7243	0.239183	1.14507e-13
ENSMUSG00000054364	Rhob	18395.8	4401.09	0.239244	4.20818e-19
ENSMUSG00000091449	Gm10269	11.9797	2.87321	0.239839	0.00835366
ENSMUSG00000028195	Cyr61	5189.69	1244.83	0.239867	3.97025e-05
ENSMUSG00000038368	BC057079	2248.57	540.535	0.24039	4.10468e-38
ENSMUSG00000033282	Rpgrip1l	1377.43	331.374	0.240574	1.0828e-32
ENSMUSG00000074203	G430095P16Rik	467.312	112.683	0.241129	7.09561e-17
ENSMUSG00000032086	Bace1	3619.25	873.079	0.241232	6.86182e-49
ENSMUSG00000041491	Cep78	881.707	212.913	0.241478	1.1696e-26
ENSMUSG00000008393	Carhsp1	5560.67	1345.63	0.241991	4.34636e-55
ENSMUSG00000062619	2310039H08Rik	546.673	132.34	0.242082	1.12725e-16
ENSMUSG00000042680	Fam59a	1206.58	292.373	0.242315	2.39951e-14
ENSMUSG00000030145	Zfp248	777.415	188.507	0.242479	3.32725e-22
ENSMUSG00000079671	2610203C22Rik	98.8936	23.9882	0.242566	4.92593e-08
ENSMUSG00000055951	Ccl25	94.877	23.0233	0.242665	5.22158e-08
ENSMUSG00000020585	Laptm4a	23643.1	5738.23	0.242702	1.68837e-51
ENSMUSG00000049295	Zfp219	5272.56	1279.8	0.242728	2.06495e-20
ENSMUSG00000026546	Ccdc19	740.104	179.898	0.243071	1.03425e-22
ENSMUSG00000035776	Cd99l2	2433.15	592.414	0.243477	2.72854e-41
ENSMUSG00000025815	Dhtkd1	387.692	94.4302	0.24357	2.87879e-15
ENSMUSG00000035234	Fam175a	406.825	99.3085	0.244106	2.32607e-16
ENSMUSG00000024942	Capn1	16833.2	4122.06	0.244877	2.10112e-55
ENSMUSG00000072949	Acot1	1201.49	294.367	0.245002	8.18397e-25
ENSMUSG00000050812	AI314180	30085.6	7377.66	0.245222	5.43408e-49
ENSMUSG00000073600	Gm1614	301.129	73.8568	0.245266	2.74012e-13
ENSMUSG00000066643	Wdr35	3436.9	844.39	0.245684	4.79493e-46
ENSMUSG00000020541	Tom1l1	4674.93	1149.11	0.245803	5.4362e-50
ENSMUSG00000005034	Prkacb	5164.69	1270.23	0.245945	7.78526e-52
ENSMUSG00000023460	Rab12	3881.76	954.79	0.245968	5.79985e-49
ENSMUSG00000022099	Epb4.9	1760.44	433.084	0.246009	1.42563e-32
ENSMUSG00000038894	Irs2	6174.74	1519.94	0.246154	1.21046e-11
ENSMUSG00000062421	Arf2	2671.3	657.813	0.246252	9.90786e-41
ENSMUSG00000000811	Txnrd3	6372.99	1569.52	0.246276	7.79789e-53
ENSMUSG00000048978	Nrsn1	122.616	30.2117	0.246394	1.48746e-08
ENSMUSG00000031861	Lpar2	451.381	111.321	0.246624	3.8466e-16
ENSMUSG00000071856	Mcc	5282.15	1303.73	0.246818	2.91392e-28
ENSMUSG00000020974	Pole2	267.998	66.1698	0.246905	2.86565e-14
ENSMUSG00000020483	Dynll2	21182.7	5235.81	0.247174	3.36055e-53
ENSMUSG00000050382	Kif7	241.997	59.9678	0.247804	1.01241e-05
ENSMUSG00000001082	Mfsd10	2068.61	512.672	0.247834	4.77517e-39
ENSMUSG00000037032	Apbb1	1528.3	378.901	0.247923	5.76639e-32
ENSMUSG00000073785	Krtap5-5	7.70935	1.91368	0.248228	0.041727
ENSMUSG00000032041	Tirap	938.825	233.112	0.248301	5.26364e-26
ENSMUSG00000026778	Prkcq	3273.36	813.005	0.24837	7.33816e-43
ENSMUSG00000053646	Plxnb1	24326.8	6042.81	0.248401	4.39986e-19
ENSMUSG00000034520	Gjc1	337.684	83.9668	0.248655	1.19616e-15
ENSMUSG00000041959	S100a10	7412.39	1843.82	0.248748	3.34814e-53
ENSMUSG00000055912	Tmem150a	256.536	63.8167	0.248763	2.58606e-13
ENSMUSG00000073465	Park2	7.68776	1.91368	0.248925	0.0416268
ENSMUSG00000061740	Cyp2d22	125.072	31.182	0.249312	0.0177974
ENSMUSG00000029205	Chrna9	972.41	242.642	0.249527	4.82208e-22
ENSMUSG00000063902	Gm7964	7.70935	1.92443	0.249623	0.0400449
ENSMUSG00000078862	Gm14326	311.263	77.7003	0.249629	2.62902e-13
ENSMUSG00000035164	Zc3h12c	2832.71	707.696	0.24983	1.22716e-08
ENSMUSG00000044066	Cep68	2834.02	708.324	0.249936	6.74825e-43
ENSMUSG00000032657	Fam189b	663.923	166.079	0.250148	4.51241e-20
ENSMUSG00000022469	Rapgef3	412.37	103.163	0.250171	2.67951e-10
ENSMUSG00000028565	Nfia	10962.7	2746.25	0.250508	3.09408e-54
ENSMUSG00000021464	Ror2	220.213	55.1863	0.250604	1.5849e-11
ENSMUSG00000000552	Zfp385a	1680.73	421.356	0.250699	2.50911e-35
ENSMUSG00000034781	Gna11	3844.33	964.207	0.250813	1.14338e-46
ENSMUSG00000078905	Gm14393	11.4669	2.87858	0.251035	0.0127173
ENSMUSG00000043207	Zmpste24	8442.81	2119.47	0.251039	1.68703e-53
ENSMUSG00000002797	Ggct	330.677	83.0234	0.251071	9.15701e-14
ENSMUSG00000038387	Rras	2824.15	710.078	0.251431	1.01816e-43
ENSMUSG00000027435	Cd93	133.396	33.5405	0.251435	0.065202
ENSMUSG00000024590	Lmnb1	5228.19	1314.82	0.251488	6.04472e-30
ENSMUSG00000021226	Acot2	618.314	155.535	0.251547	4.68769e-17
ENSMUSG00000033068	Entpd6	3261.99	821.001	0.251687	2.17382e-42
ENSMUSG00000025153	Fasn	29353.7	7393.57	0.251879	5.50789e-48
ENSMUSG00000020601	Trib2	1911.4	481.613	0.251969	4.98969e-36
ENSMUSG00000054850	Ncrna00086	235.843	59.4316	0.251997	5.7835e-12
ENSMUSG00000058254	Tspan7	620.037	156.285	0.252057	4.43781e-08
ENSMUSG00000040213	Ccbl2	856.954	216.376	0.252495	1.52886e-21
ENSMUSG00000021144	Mta1	5035.9	1272.32	0.252649	1.31397e-50
ENSMUSG00000017639	Rab11fip4	24775.5	6262.26	0.252761	1.90372e-49
ENSMUSG00000069835	Sat2	142.245	35.9796	0.252941	2.03931e-09
ENSMUSG00000037295	Ldlrap1	5151.8	1303.95	0.253105	7.94086e-49
ENSMUSG00000031575	Ash2l	6963.53	1764.04	0.253326	3.86249e-52
ENSMUSG00000027428	Rbbp9	1312.71	332.56	0.253339	9.12417e-30
ENSMUSG00000022186	Oxct1	8543.93	2164.9	0.253384	5.06508e-53
ENSMUSG00000073209	Klf14	104.103	26.379	0.253392	9.56505e-08
ENSMUSG00000030522	Mtmr10	2655.25	673.074	0.253488	6.86118e-40
ENSMUSG00000041673	Lrrc18	240.173	60.9327	0.253704	3.75708e-12
ENSMUSG00000072875	Gpr27	260.903	66.2021	0.253742	1.66928e-06
ENSMUSG00000036916	Zfp280c	1157.78	293.894	0.253843	4.88817e-10
ENSMUSG00000032263	Bckdhb	3052.54	775.021	0.253894	2.96831e-40
ENSMUSG00000051934	Spats2	6815.94	1731.02	0.253966	6.28538e-51
ENSMUSG00000022836	Mylk	8602.28	2188.33	0.254389	9.5398e-32
ENSMUSG00000038718	Pbx3	1246.51	317.636	0.254821	1.834e-28
ENSMUSG00000021098	4930447C04Rik	470.045	119.785	0.254838	1.32843e-06
ENSMUSG00000035585	Tsen34	2691.4	686.185	0.254954	6.52554e-42
ENSMUSG00000037725	Ckap2	1120.42	285.896	0.25517	5.53699e-29
ENSMUSG00000021365	Nedd9	4914.78	1255.25	0.255402	7.66893e-18
ENSMUSG00000025607	Copg2	9539.7	2436.8	0.255438	7.60871e-53
ENSMUSG00000074603	Gm10729	33.8446	8.65188	0.255636	0.0214405
ENSMUSG00000039145	Camk1d	2141.38	548.084	0.255949	2.19237e-33
ENSMUSG00000059479	B3gnt8	136.717	35.0201	0.25615	1.11128e-08
ENSMUSG00000015202	Cnksr3	1868.04	478.783	0.256303	1.11144e-27
ENSMUSG00000058883	Zfp708	239.579	61.4259	0.256392	4.98686e-12
ENSMUSG00000016496	Cd274	29498.2	7565.31	0.256467	0.0803933
ENSMUSG00000071181	3830408C21Rik	20.5421	5.26934	0.256514	0.0026606
ENSMUSG00000079444	Prickle4	177.655	45.5749	0.256536	3.8084e-10
ENSMUSG00000047330	Kcne4	132.63	34.0391	0.256646	1.91317e-05
ENSMUSG00000026176	Ctdsp1	5596.35	1436.71	0.256723	9.67439e-50
ENSMUSG00000032402	Smad3	6149.21	1579.42	0.256849	1.2539e-49
ENSMUSG00000047988	4933428G20Rik	179.34	46.0789	0.256936	6.56394e-11
ENSMUSG00000048490	Nrip1	5407.3	1390.26	0.257108	2.79988e-36
ENSMUSG00000045284	Dcaf12l1	1356.84	349.231	0.257386	1.45138e-28
ENSMUSG00000062078	Qk	6852.38	1770.81	0.258422	1.27327e-43
ENSMUSG00000001089	Luzp1	6420.38	1660.94	0.258699	2.85336e-50
ENSMUSG00000005656	Snx6	7952.16	2061.79	0.259274	3.19876e-51
ENSMUSG00000048960	Prex2	1048.47	272.067	0.259488	1.48016e-18
ENSMUSG00000050017	Pitpnb	10570.3	2744.51	0.259642	7.60205e-52
ENSMUSG00000040524	Zfp609	3014.28	782.932	0.259741	1.68229e-33
ENSMUSG00000053467	A530088E08Rik	73.9136	19.2067	0.259853	0.010052
ENSMUSG00000027739	Rab33b	2313.96	604.052	0.261047	2.50911e-35
ENSMUSG00000032959	Pebp1	9215.36	2414.54	0.262012	2.71569e-44
ENSMUSG00000035863	Palm	702.043	184.127	0.262273	1.39656e-20
ENSMUSG00000008450	Nutf2	314.367	82.4872	0.262391	2.76885e-13
ENSMUSG00000091337	Eid1	5706.31	1498.54	0.26261	1.66936e-48
ENSMUSG00000092279	1500011B03Rik	140.62	36.9338	0.262649	6.15858e-09
ENSMUSG00000028139	Riiad1	646.825	170.373	0.263398	2.28552e-13
ENSMUSG00000001750	Tcirg1	4079.39	1074.96	0.263509	1.10226e-14
ENSMUSG00000057531	Dtnbp1	2451.06	645.965	0.263545	3.95158e-37
ENSMUSG00000022433	Csnk1e	3433.77	904.959	0.263547	2.01159e-42
ENSMUSG00000028675	Pnrc2	12633.3	3331.45	0.263704	1.77085e-29
ENSMUSG00000047238	Mageh1	536.394	141.474	0.26375	2.38944e-17
ENSMUSG00000048612	Myof	6130.43	1617.33	0.263821	7.52136e-48
ENSMUSG00000050875	A730017C20Rik	716.425	189.027	0.263847	2.39178e-22
ENSMUSG00000022439	Parvg	445.69	117.62	0.263906	9.33604e-05
ENSMUSG00000001473	Tubb6	9368.42	2472.5	0.263918	6.36103e-33
ENSMUSG00000001173	Ocrl	2009.48	530.538	0.264018	1.69295e-26
ENSMUSG00000021375	Kif13a	7839.4	2070.18	0.264073	5.17052e-50
ENSMUSG00000040007	Bahd1	9248.07	2445.29	0.264411	3.09704e-50
ENSMUSG00000063558	Aox1	1254.63	332.002	0.264622	8.08296e-10
ENSMUSG00000031925	Maml2	1297.4	343.377	0.264666	2.8744e-18
ENSMUSG00000037990	Sh3rf3	3733.93	988.812	0.264818	3.21772e-44
ENSMUSG00000032560	Dnajc13	27050.7	7169.53	0.265041	1.77304e-45
ENSMUSG00000040022	Rab11fip2	2306.95	611.856	0.265223	3.0636e-22
ENSMUSG00000021676	Iqgap2	8854.93	2350.37	0.265431	5.70722e-49
ENSMUSG00000024513	Mbd2	4852.32	1288.99	0.265644	2.61762e-46
ENSMUSG00000025577	Cbx2	1926.23	511.782	0.265691	3.79244e-36
ENSMUSG00000028776	Tinagl1	7063.84	1876.99	0.265718	3.73228e-18
ENSMUSG00000026193	Fn1	49909.4	13264.1	0.265764	9.08e-30
ENSMUSG00000079042	Trim61	14.4146	3.83274	0.265893	0.00865721
ENSMUSG00000021109	Hif1a	19096	5081.5	0.266103	8.76825e-29
ENSMUSG00000000037	Scml2	236.286	62.8787	0.266113	3.17985e-11
ENSMUSG00000022203	Efs	5728.37	1524.56	0.266141	6.12882e-23
ENSMUSG00000079694	Gm14862	28.7859	7.67085	0.266479	0.00045482
ENSMUSG00000015501	Hivep2	3753.46	1001.08	0.266708	3.66291e-15
ENSMUSG00000057147	Atpbd4	1507.01	401.988	0.266745	9.5899e-31
ENSMUSG00000029924	Slc37a3	2672.74	713.048	0.266785	1.67409e-39
ENSMUSG00000032026	Rexo2	3214.69	857.78	0.266832	2.2666e-41
ENSMUSG00000022323	Hrsp12	600.65	160.681	0.267511	3.7154e-17
ENSMUSG00000020780	Srp68	13087.7	3502.28	0.2676	1.19669e-49
ENSMUSG00000039616	Mocos	2181.83	583.913	0.267626	4.92628e-16
ENSMUSG00000056492	Gpr116	653.222	175.117	0.268081	1.02149e-11
ENSMUSG00000014980	Tsen15	916.534	246.175	0.268594	5.16772e-22
ENSMUSG00000079733	Tmem181b-ps	1231.97	331.498	0.26908	1.30514e-25
ENSMUSG00000028709	Mob3c	1507.5	406.888	0.269908	6.41003e-20
ENSMUSG00000054676	1600014C10Rik	5075.94	1371.92	0.27028	1.86019e-45
ENSMUSG00000018593	Sparc	8869.58	2397.46	0.270302	1.18432e-18
ENSMUSG00000030393	Zik1	278.665	75.331	0.270328	7.40366e-13
ENSMUSG00000031748	Gnao1	474.579	128.469	0.270701	3.70138e-15
ENSMUSG00000046432	Ngfrap1	3627.96	982.293	0.270757	2.06989e-42
ENSMUSG00000023044	Csad	3176.01	859.958	0.270767	4.20189e-39
ENSMUSG00000051074	4930579K19Rik	33.6771	9.12358	0.270913	0.000227608
ENSMUSG00000033446	Lpar6	882.981	239.276	0.270986	1.76999e-20
ENSMUSG00000029090	Gpr125	2102.35	569.761	0.271011	1.84327e-36
ENSMUSG00000030056	Isy1	3508.95	951.583	0.271188	3.47407e-41
ENSMUSG00000036676	Tmtc3	4376.89	1187.53	0.271317	2.61244e-44
ENSMUSG00000052142	Rasal3	710.783	192.946	0.271455	0.000293104
ENSMUSG00000020364	Zfp354a	65.2596	17.7325	0.271722	2.85924e-06
ENSMUSG00000036249	Rbm43	2547.71	692.356	0.271756	3.10733e-36
ENSMUSG00000026991	Pkp4	7454.89	2026.53	0.27184	3.99018e-48
ENSMUSG00000041779	Tram2	446.106	121.345	0.27201	7.90753e-10
ENSMUSG00000031310	Zmym3	3465.21	942.996	0.272133	1.1767e-22
ENSMUSG00000027938	Creb3l4	188.307	51.2891	0.272369	2.60011e-05
ENSMUSG00000034557	Zfyve9	3392.59	925.145	0.272696	4.30914e-41
ENSMUSG00000025264	Tsr2	1362.7	371.702	0.272769	8.40377e-29
ENSMUSG00000034317	Trim59	2941.99	802.729	0.272852	1.04952e-34
ENSMUSG00000021003	Galc	767.881	209.59	0.272946	1.96057e-19
ENSMUSG00000022253	1110020G09Rik	2023.66	552.763	0.27315	2.04025e-32
ENSMUSG00000020696	Rffl	4170.32	1139.47	0.273235	2.85361e-43
ENSMUSG00000060260	Pwwp2b	1086.76	296.95	0.273243	4.45209e-23
ENSMUSG00000037395	Rcor3	1375.92	376.103	0.273346	9.14402e-29
ENSMUSG00000063704	Mapk15	786.025	214.886	0.273383	1.45101e-11
ENSMUSG00000022843	Clcn2	1580.87	432.259	0.273431	8.01945e-07
ENSMUSG00000033970	Rfc3	1427.58	390.383	0.273457	3.72254e-29
ENSMUSG00000058325	Dock1	11147.3	3049.07	0.273524	3.08178e-48
ENSMUSG00000081769	Gm12216	675.023	184.723	0.273654	1.74556e-16
ENSMUSG00000029267	Mtf2	4049.99	1108.55	0.273717	1.35505e-29
ENSMUSG00000039953	Clstn1	29082.4	7962.06	0.273776	6.89954e-42
ENSMUSG00000024079	Eif2ak2	4136.02	1132.5	0.273814	5.33348e-15
ENSMUSG00000001305	Rrp15	852.478	233.422	0.273816	1.80025e-21
ENSMUSG00000043102	Qrfp	141.797	38.8367	0.273889	2.73309e-08
ENSMUSG00000026484	Rnf2	2980.52	816.35	0.273896	3.78588e-25
ENSMUSG00000073705	Apitd1	208.234	57.0677	0.274056	3.77858e-11
ENSMUSG00000005779	Psmb4	24024.5	6584.09	0.274057	3.1361e-22
ENSMUSG00000028532	Cachd1	6429.74	1762.81	0.274165	4.57268e-16
ENSMUSG00000020605	Hs1bp3	1409.51	386.711	0.27436	1.31929e-23
ENSMUSG00000024276	Zfp397	3743.9	1027.19	0.274365	2.2829e-42
ENSMUSG00000017697	Ada	2728.41	748.956	0.274503	2.41568e-34
ENSMUSG00000022747	St3gal6	5323.25	1461.64	0.274577	2.1078e-43
ENSMUSG00000078921	Tgtp2	482.068	132.409	0.27467	0.000571414
ENSMUSG00000026003	Acadl	5237.31	1438.8	0.274721	5.95415e-45
ENSMUSG00000026705	Klhl20	3041.18	836.049	0.274909	5.78802e-38
ENSMUSG00000044906	4930503L19Rik	167.209	45.9982	0.275094	1.23928e-09
ENSMUSG00000073652	Apol7d	453.168	124.69	0.275152	1.82544e-13
ENSMUSG00000032776	Mctp2	1263.15	347.735	0.275291	2.35116e-27
ENSMUSG00000061848	Gm5805	92.3179	25.4194	0.275347	0.00661112
ENSMUSG00000056185	Snx32	822.169	226.475	0.275461	6.07645e-17
ENSMUSG00000045071	E130308A19Rik	1044.88	287.928	0.275562	2.32803e-22
ENSMUSG00000004880	Lbr	2742.3	755.674	0.275562	1.19871e-34
ENSMUSG00000049807	Arhgap23	2400.34	661.678	0.27566	3.76019e-35
ENSMUSG00000092192	Dyx1c1	177.288	48.8768	0.275691	2.45891e-09
ENSMUSG00000051721	BC068281	277.936	76.7622	0.276186	8.2643e-12
ENSMUSG00000060671	Atp8b2	4134.5	1142.25	0.276273	1.91239e-38
ENSMUSG00000028093	Acp6	1279.5	353.664	0.276408	6.5212e-26
ENSMUSG00000064061	Dzip3	2510.02	695.373	0.277038	8.00424e-21
ENSMUSG00000045008	9030612E09Rik	17.3191	4.80302	0.277326	0.0223217
ENSMUSG00000035107	Dcbld2	4533.86	1258.63	0.277607	8.78459e-41
ENSMUSG00000034118	Tpst1	818.655	227.328	0.277684	3.45539e-20
ENSMUSG00000030336	Cd27	397.107	110.33	0.277833	6.71579e-06
ENSMUSG00000078484	Klhl17	1931.18	536.564	0.277842	2.8535e-12
ENSMUSG00000019845	Tube1	539.795	150.067	0.278007	8.26667e-16
ENSMUSG00000008763	Man1a2	5073.25	1410.55	0.278038	3.46554e-45
ENSMUSG00000002379	Ndufa11	8416.95	2342.15	0.278266	3.84214e-24
ENSMUSG00000041046	Ramp3	1726.48	480.6	0.278371	1.49219e-26
ENSMUSG00000041840	Haus1	556.488	154.945	0.278433	5.93709e-18
ENSMUSG00000001517	Foxm1	2128.85	592.865	0.27849	2.83826e-34
ENSMUSG00000062040	Zfp27	482.062	134.296	0.278587	2.48185e-15
ENSMUSG00000047342	Zfp286	65.2812	18.2257	0.279187	2.44978e-06
ENSMUSG00000021540	Smad5	6816.6	1903.51	0.279246	3.42623e-46
ENSMUSG00000071180	2810008M24Rik	2419.71	675.969	0.279359	5.16123e-35
ENSMUSG00000073681	1500002C15Rik	25.7087	7.18302	0.2794	0.0587493
ENSMUSG00000068270	Shroom4	588.978	164.594	0.279457	2.07326e-09
ENSMUSG00000074661	Pde4d	257.53	71.97	0.279463	1.74886e-12
ENSMUSG00000048747	E130114P18Rik	109.848	30.7049	0.279523	5.80644e-08
ENSMUSG00000000295	Hddc2	490.548	137.207	0.279702	3.11766e-15
ENSMUSG00000032228	Tcf12	9930.28	2779.56	0.279908	1.9677e-28
ENSMUSG00000005628	Tmod4	244.983	68.5928	0.27999	4.41644e-10
ENSMUSG00000047033	Pcdhb15	35.9608	10.0724	0.280092	0.000173562
ENSMUSG00000020042	Btbd11	16361.4	4591.9	0.280654	2.01095e-45
ENSMUSG00000021140	Pcnx	5522.69	1551.08	0.280856	3.69961e-44
ENSMUSG00000020682	Mmp28	1084.36	304.626	0.280927	3.01975e-22
ENSMUSG00000022414	Tab1	2601.31	731.159	0.281074	5.2797e-30
ENSMUSG00000022847	Thpo	78.4973	22.0691	0.281145	0.00395848
ENSMUSG00000025762	Larp1b	251.083	70.5925	0.281152	1.34606e-09
ENSMUSG00000029673	Auts2	3347.11	941.394	0.281256	5.23761e-32
ENSMUSG00000071757	Zhx2	4580.26	1289.15	0.281458	8.7874e-43
ENSMUSG00000039497	Dse	1346.83	379.1	0.281475	4.25501e-27
ENSMUSG00000027438	Napb	287.227	81.029	0.282108	1.45863e-11
ENSMUSG00000028358	Zfp618	2595.03	732.774	0.282376	1.76043e-20
ENSMUSG00000029207	Apbb2	1820.69	514.28	0.282465	1.55713e-29
ENSMUSG00000035109	Shc4	2465.15	696.885	0.282694	1.08353e-33
ENSMUSG00000048402	Gli2	743.926	210.635	0.28314	6.15031e-17
ENSMUSG00000041935	AW549877	4053.52	1147.82	0.283166	6.12247e-41
ENSMUSG00000064043	Trerf1	1642.01	465.264	0.28335	9.57482e-29
ENSMUSG00000091191	Gm17334	1936.27	548.802	0.283432	0.00115237
ENSMUSG00000029290	Zfp326	2500.61	708.801	0.283451	1.44474e-36
ENSMUSG00000022307	Oxr1	5486.92	1555.33	0.283462	4.27005e-44
ENSMUSG00000029859	Epha1	2381.11	675.631	0.283747	7.87388e-35
ENSMUSG00000039234	Sec24d	11726.4	3327.66	0.283775	8.27597e-46
ENSMUSG00000020538	Srebf1	13611.5	3863.27	0.283824	3.12046e-42
ENSMUSG00000066324	Impad1	6355.63	1804.83	0.283974	1.48109e-44
ENSMUSG00000020475	Pgam2	500.007	142.021	0.284038	5.31025e-14
ENSMUSG00000019846	Lama4	5868.06	1667.58	0.28418	6.56687e-44
ENSMUSG00000036186	Fam69b	163.71	46.529	0.284216	8.47735e-09
ENSMUSG00000040372	Gpr63	496.115	141.024	0.284256	8.55051e-15
ENSMUSG00000027259	Adal	862.541	245.259	0.284345	1.12787e-19
ENSMUSG00000044548	Dact1	1986.31	565.243	0.284569	2.09578e-29
ENSMUSG00000005233	Spc25	2172.34	618.611	0.284767	4.37363e-33
ENSMUSG00000055322	Tns1	5861.87	1671.72	0.285185	1.99529e-41
ENSMUSG00000079662	Ntn3	80.6783	23.0233	0.285371	1.9863e-06
ENSMUSG00000045573	Penk	4289.61	1224.65	0.285493	3.48436e-32
ENSMUSG00000036334	Igsf10	2384.65	680.874	0.285524	6.47206e-10
ENSMUSG00000020829	Slc46a1	825.333	235.969	0.285907	7.48885e-18
ENSMUSG00000026718	Stam	2830.11	809.172	0.285915	7.00957e-36
ENSMUSG00000030055	Rab43	2856.59	817.084	0.286034	2.28132e-35
ENSMUSG00000041596	Vmn1r90	20.1588	5.76792	0.286124	0.00347422
ENSMUSG00000037761	Actr5	1867.97	534.473	0.286125	1.02205e-28
ENSMUSG00000051675	Trim32	1301.01	372.259	0.286131	5.40139e-25
ENSMUSG00000023348	Trip6	2379.71	681.093	0.286208	3.59358e-33
ENSMUSG00000025083	Afap1l2	5638.05	1614.59	0.286374	7.88233e-14
ENSMUSG00000079003	Samd1	2129.94	610.586	0.286668	5.35865e-26
ENSMUSG00000045136	Tubb2b	7672.84	2199.99	0.286725	6.78426e-42
ENSMUSG00000001588	Acap1	643.78	184.749	0.286976	8.54433e-07
ENSMUSG00000002617	Zfp40	611.577	175.513	0.286984	1.42861e-16
ENSMUSG00000019975	Ikbip	1078.54	309.542	0.287001	2.53077e-23
ENSMUSG00000024331	Dsc2	17848.7	5125.2	0.287147	1.19894e-41
ENSMUSG00000003923	Tfam	3438.5	989.069	0.287646	1.15599e-39
ENSMUSG00000066057	2610044O15Rik	89.9426	25.875	0.287683	2.03978e-05
ENSMUSG00000034883	Lrr1	68.2721	19.6461	0.287762	3.37606e-06
ENSMUSG00000041748	Ccrl1	265.077	76.2852	0.287785	1.27892e-10
ENSMUSG00000030775	Trat1	378.266	108.888	0.28786	8.32131e-12
ENSMUSG00000025742	Prps2	1878.62	540.853	0.287899	6.13614e-31
ENSMUSG00000030257	Srgap3	3001.51	865.435	0.288333	2.19242e-12
ENSMUSG00000036904	Fzd8	1162.77	335.266	0.288333	1.26244e-17
ENSMUSG00000027883	Gpsm2	1410.3	406.668	0.288356	3.76912e-28
ENSMUSG00000037833	Sh2d4b	13258.7	3823.27	0.28836	5.7324e-44
ENSMUSG00000027439	Gzf1	2102.49	606.379	0.28841	9.59539e-32
ENSMUSG00000036875	Dna2	658.664	190.008	0.288475	3.32282e-17
ENSMUSG00000014353	Tmem87b	3411.44	984.176	0.288493	2.6625e-38
ENSMUSG00000030309	Caprin2	1146.1	330.871	0.288693	2.50812e-23
ENSMUSG00000074355	Gm10676	357.297	103.173	0.288761	1.42136e-11
ENSMUSG00000029405	G3bp2	15761.1	4553.94	0.288935	3.22282e-43
ENSMUSG00000028845	Tekt2	687.429	198.655	0.288982	1.41209e-15
ENSMUSG00000069089	Cdk7	3355.54	969.986	0.28907	6.05671e-38
ENSMUSG00000048007	Timm8a1	543.499	157.346	0.289506	4.23116e-16
ENSMUSG00000035085	1700020L24Rik	347.763	100.734	0.289663	5.98483e-12
ENSMUSG00000034462	Pkd2	3874.04	1123.19	0.289928	3.125e-21
ENSMUSG00000038332	Sesn1	3363.56	975.454	0.290007	8.80175e-37
ENSMUSG00000055733	Nap1l3	117.384	34.0659	0.290209	1.21125e-07
ENSMUSG00000033233	Trim45	297.453	86.336	0.290251	2.07748e-11
ENSMUSG00000020227	Irak3	253.032	73.4765	0.290384	7.81678e-06
ENSMUSG00000031502	Col4a1	33737.3	9798.26	0.290428	6.39034e-24
ENSMUSG00000001576	Ergic1	3562.65	1034.91	0.290489	3.2583e-39
ENSMUSG00000029428	Stx2	747.721	217.223	0.290513	7.60037e-17
ENSMUSG00000025040	Fundc1	2456.42	713.749	0.290564	7.57156e-34
ENSMUSG00000061887	Ssbp3	8230.38	2392.07	0.290639	7.4968e-44
ENSMUSG00000072553	Gm525	46.2345	13.4388	0.290665	0.00526169
ENSMUSG00000021067	Sav1	2977.69	866.904	0.291133	1.96721e-36
ENSMUSG00000074059	Fbxw18	32.9916	9.61679	0.291492	0.000548059
ENSMUSG00000038522	AI317395	106.84	31.1605	0.291654	8.27112e-07
ENSMUSG00000052504	Epha3	3085.59	900.154	0.291728	1.88743e-35
ENSMUSG00000025085	Ablim1	25640.4	7484.91	0.291919	1.29072e-38
ENSMUSG00000071586	Gm10337	23.0633	6.73282	0.291928	0.0110438
ENSMUSG00000037736	Limch1	6008.2	1755.23	0.29214	2.13067e-16
ENSMUSG00000028086	Fbxw7	5628.93	1644.75	0.292197	2.3575e-25
ENSMUSG00000042797	Aqp11	296.772	86.7647	0.292361	6.79403e-11
ENSMUSG00000031562	Dctd	396.811	116.017	0.292373	2.60453e-13
ENSMUSG00000029869	Ephb6	1628.27	476.381	0.29257	1.51743e-28
ENSMUSG00000047193	Dync2h1	4006.21	1172.13	0.292578	3.34328e-28
ENSMUSG00000000326	Comt	8405.09	2459.68	0.292642	6.90667e-42
ENSMUSG00000026473	Glul	8665.29	2536.04	0.292666	4.69651e-43
ENSMUSG00000037735	2810032G03Rik	292.891	85.8697	0.29318	3.367e-11
ENSMUSG00000045822	Zswim3	614.768	180.402	0.293447	2.28418e-15
ENSMUSG00000056531	Ccdc18	799.096	234.511	0.29347	2.52165e-11
ENSMUSG00000036093	Arl5a	3991.05	1171.28	0.293476	3.96905e-39
ENSMUSG00000037029	Zfp146	2514.68	738.365	0.293622	4.85872e-35
ENSMUSG00000063273	Naa15	9202.96	2702.88	0.293697	1.07936e-40
ENSMUSG00000006678	Pola1	1789.54	525.757	0.293795	3.12861e-15
ENSMUSG00000038954	Supt3h	810.725	238.263	0.293888	9.60551e-19
ENSMUSG00000031068	Glrx3	7478.67	2200.08	0.294181	6.26053e-43
ENSMUSG00000022106	Rcbtb2	6420.03	1889.63	0.294333	5.49091e-42
ENSMUSG00000030226	Lmo3	447.704	131.9	0.294614	6.36329e-14
ENSMUSG00000060703	Cd302	96.0539	28.3034	0.294662	7.31812e-06
ENSMUSG00000061143	Maml3	2250.26	663.816	0.294995	1.05319e-31
ENSMUSG00000030446	Zfp273	110.49	32.6132	0.295169	2.60473e-07
ENSMUSG00000059486	Kbtbd2	5538.34	1635.42	0.295291	4.8008e-41
ENSMUSG00000069830	Nlrp1a	269.342	79.6193	0.295607	1.50843e-10
ENSMUSG00000023968	Crip3	36078.5	10669.1	0.29572	7.44653e-29
ENSMUSG00000039033	Tasp1	1029.73	304.513	0.295722	4.90024e-20
ENSMUSG00000026692	Fmo4	106.916	31.6537	0.29606	0.0465686
ENSMUSG00000028524	Sgip1	202.544	59.9893	0.29618	4.85624e-05
ENSMUSG00000043850	Clrn1	436.68	129.483	0.296516	3.9639e-14
ENSMUSG00000029191	Rfc1	3873.89	1149.04	0.296611	1.68625e-38
ENSMUSG00000032966	Fkbp1a	14446.7	4285.4	0.296635	3.87904e-42
ENSMUSG00000045038	Prkce	1400.02	415.379	0.296696	6.02217e-25
ENSMUSG00000022537	Tmem44	148.783	44.1437	0.296698	3.80858e-08
ENSMUSG00000022286	Grhl2	4186.37	1242.82	0.296873	5.6875e-30
ENSMUSG00000032397	Tipin	851.728	253.251	0.297338	2.43598e-19
ENSMUSG00000026269	Rnpepl1	12803	3807.94	0.297425	1.69138e-32
ENSMUSG00000062937	Mtap	1103.87	328.55	0.297633	1.30177e-23
ENSMUSG00000041797	Abca9	70.858	21.1311	0.298218	9.89481e-05
ENSMUSG00000091213	Gm17253	17.7024	5.28009	0.29827	0.00546464
ENSMUSG00000072960	BC065397	81.9147	24.4438	0.298405	3.09086e-06
ENSMUSG00000010751	Tnfrsf22	258.841	77.277	0.29855	9.93862e-11
ENSMUSG00000043753	Dmrta1	604.267	180.418	0.298573	2.90535e-14
ENSMUSG00000069045	Ddx3y	2756.24	823.524	0.298785	0.00391154
ENSMUSG00000016494	Cd34	1391.77	415.942	0.298858	3.08822e-22
ENSMUSG00000027239	Mdk	8665.29	2591.54	0.299072	1.31157e-41
ENSMUSG00000079017	Ifi27l2a	1567.98	469.053	0.299144	2.47957e-14
ENSMUSG00000038418	Egr1	39631.2	11876.9	0.299687	0.0188498
ENSMUSG00000032058	Ppp2r1b	5172.66	1550.86	0.29982	3.42616e-39
ENSMUSG00000051316	Taf7	2418.26	725.206	0.299888	3.00482e-31
ENSMUSG00000032352	Lrrc1	3568.16	1070.94	0.300136	6.51293e-36
ENSMUSG00000050222	Il17d	140.431	42.2085	0.300563	1.4863e-07
ENSMUSG00000026782	Abi2	4448.69	1337.5	0.300649	2.4439e-38
ENSMUSG00000063253	Scoc	2238.73	673.39	0.300791	6.87467e-31
ENSMUSG00000040102	Klhdc5	3175.12	955.074	0.300799	1.1626e-36
ENSMUSG00000026102	Inpp1	4104.51	1235.37	0.300978	5.78016e-37
ENSMUSG00000078768	Zfp566	264.602	79.6516	0.301024	1.85217e-10
ENSMUSG00000017692	Rhbdl3	6225.32	1874.81	0.301159	8.88929e-39
ENSMUSG00000071553	Cpa2	211.586	63.7468	0.30128	5.32844e-10
ENSMUSG00000022329	Stk3	2390.47	720.98	0.301606	3.18261e-31
ENSMUSG00000044847	Lsm11	672.598	202.884	0.301642	6.65471e-17
ENSMUSG00000058351	2010107H07Rik	246.138	74.3016	0.30187	5.90266e-10
ENSMUSG00000035697	Hmha1	1973.81	595.974	0.301941	2.29045e-06
ENSMUSG00000041548	Hspb8	6072.58	1836.16	0.302369	1.78197e-39
ENSMUSG00000078297	Gm3150	20.6069	6.23424	0.302532	0.00348544
ENSMUSG00000059482	2610301B20Rik	1695.1	512.989	0.302631	1.08037e-26
ENSMUSG00000031176	Dynlt3	7654.75	2316.73	0.302653	5.01442e-41
ENSMUSG00000063179	Pstk	462.464	140.016	0.30276	1.39954e-13
ENSMUSG00000061024	Rrs1	2191.04	663.559	0.302851	4.31224e-31
ENSMUSG00000031875	Cmtm3	813.791	246.47	0.302866	4.83595e-20
ENSMUSG00000028710	Atpaf1	2080.52	630.446	0.303023	9.02655e-30
ENSMUSG00000058881	Zfp516	5670.83	1719.1	0.303148	1.48447e-39
ENSMUSG00000068220	Lgals1	2022.95	613.732	0.303385	1.61009e-34
ENSMUSG00000071252	2210408I21Rik	708.57	215.031	0.303472	4.48488e-17
ENSMUSG00000034898	Filip1	469.337	142.503	0.303627	6.29293e-13
ENSMUSG00000026779	Mastl	723.195	219.732	0.303835	1.57241e-17
ENSMUSG00000022197	Pdzd2	9519.07	2895.89	0.30422	2.63461e-19
ENSMUSG00000040321	Zfp770	769.322	234.087	0.304277	9.31307e-18
ENSMUSG00000079020	Slc45a4	6478.49	1972.02	0.304395	1.03308e-33
ENSMUSG00000028484	Psip1	10611.9	3231.75	0.30454	5.37875e-41
ENSMUSG00000038658	C030046E11Rik	8982.98	2735.81	0.304555	4.98007e-41
ENSMUSG00000022177	Haus4	957.974	291.756	0.304555	2.88834e-20
ENSMUSG00000037474	Dtl	1012.08	308.33	0.304651	1.20565e-11
ENSMUSG00000024588	Fech	2486.73	757.86	0.304762	2.92648e-32
ENSMUSG00000035208	Slfn8	519.2	158.371	0.305028	7.92239e-05
ENSMUSG00000070394	1810027O10Rik	778.1	237.378	0.305075	6.22654e-18
ENSMUSG00000040043	Rbms2	2866.33	874.451	0.305077	3.7718e-34
ENSMUSG00000082229	Nap1l2	97.3118	29.7292	0.305505	1.07273e-06
ENSMUSG00000046562	Unc119b	2198.14	672.034	0.305729	3.21702e-24
ENSMUSG00000070304	Scn2b	1345.19	411.465	0.305879	2.0171e-24
ENSMUSG00000006356	Crip2	6495.67	1987.43	0.305963	2.69452e-24
ENSMUSG00000037286	Stag1	5036.59	1541.37	0.306034	5.53545e-25
ENSMUSG00000078906	Gm14444	23.533	7.20452	0.306146	0.00290686
ENSMUSG00000024268	Celf4	311.846	95.4704	0.306146	9.04977e-11
ENSMUSG00000003038	Hmgn2	1742.53	533.996	0.306448	3.00805e-29
ENSMUSG00000040124	Gorab	802.815	246.046	0.306479	3.77853e-18
ENSMUSG00000035443	Thyn1	1546.09	473.921	0.306528	9.42963e-26
ENSMUSG00000049791	Fzd4	286.11	87.7189	0.306591	4.72932e-10
ENSMUSG00000022641	Bbx	3987.74	1225.58	0.307336	4.45457e-37
ENSMUSG00000041220	Elovl6	2746.36	844.139	0.307367	2.79635e-32
ENSMUSG00000027316	Gfra4	1006.17	309.354	0.307457	4.86662e-22
ENSMUSG00000078891	Gm11008	17.2543	5.30697	0.307574	0.0293934
ENSMUSG00000006941	Eif1b	1656.61	509.809	0.307743	2.14587e-27
ENSMUSG00000073679	Gm10562	13.9665	4.29906	0.307813	0.0208096
ENSMUSG00000018340	Anxa6	13172.3	4056.02	0.307921	5.3081e-39
ENSMUSG00000048251	Bcl11b	1819.28	560.305	0.307982	2.60458e-10
ENSMUSG00000022639	5330426P16Rik	434.639	133.954	0.308195	2.83342e-12
ENSMUSG00000030872	Gga2	7643.28	2356.55	0.308316	6.73405e-40
ENSMUSG00000022246	Rai14	6799.91	2097.44	0.308451	1.40644e-39
ENSMUSG00000019841	Rev3l	6064.75	1871.38	0.308568	1.07328e-22
ENSMUSG00000041773	Enc1	6651.8	2053.77	0.308754	2.0871e-28
ENSMUSG00000024535	Snx24	236.075	72.9241	0.308903	4.32222e-09
ENSMUSG00000052364	B630019K06Rik	243.617	75.3418	0.309263	1.20073e-09
ENSMUSG00000058446	Znrf2	8280.96	2562.19	0.309408	6.24339e-40
ENSMUSG00000047910	Pcdhb16	113.135	35.0147	0.309494	1.59991e-07
ENSMUSG00000017485	Top2b	13009.1	4031.47	0.309897	3.08458e-31
ENSMUSG00000016477	E2f3	1241.35	384.76	0.309952	5.42574e-17
ENSMUSG00000030417	Pdcd5	3139.11	973.008	0.309963	1.51766e-33
ENSMUSG00000057143	Trim12c	1904.49	590.501	0.310058	2.10118e-18
ENSMUSG00000054889	Dsp	147537	45777.7	0.31028	2.67748e-18
ENSMUSG00000040034	Nup43	610.168	189.354	0.31033	4.42361e-16
ENSMUSG00000029059	2810405K02Rik	15608.3	4845.76	0.310461	1.57546e-18
ENSMUSG00000060519	Tor3a	2045.88	635.251	0.310502	1.35055e-30
ENSMUSG00000002319	Ipo4	7006.26	2175.77	0.310546	3.18741e-39
ENSMUSG00000059674	Cdh24	516.171	160.343	0.31064	2.67586e-13
ENSMUSG00000022389	Tef	6625.22	2059.84	0.31091	1.42482e-38
ENSMUSG00000032640	Chsy1	1169.67	363.955	0.311161	3.20532e-22
ENSMUSG00000067924	Cxx1b	191.109	59.4961	0.311321	1.99564e-08
ENSMUSG00000024597	Slc12a2	4313.11	1342.86	0.311344	1.00378e-37
ENSMUSG00000042203	Tbc1d22b	4753.41	1479.95	0.311345	8.46119e-37
ENSMUSG00000039067	Psmd7	9551.74	2974.97	0.311458	1.21419e-39
ENSMUSG00000078860	Gm11006	7.70935	2.40151	0.311506	0.0904731
ENSMUSG00000028133	Rwdd3	160.007	49.8847	0.311766	5.04225e-08
ENSMUSG00000069855	Slc47a2	292.389	91.1928	0.311889	1.04509e-09
ENSMUSG00000034460	Six4	3185.22	993.476	0.311902	1.53209e-34
ENSMUSG00000034212	Ankmy1	531.903	165.934	0.311963	6.58278e-12
ENSMUSG00000058402	Zfp420	449	140.096	0.312019	5.11994e-13
ENSMUSG00000046269	Usp27x	463.706	144.948	0.312585	1.58208e-12
ENSMUSG00000020608	Smc6	5353.21	1675.04	0.312904	4.93758e-25
ENSMUSG00000021693	Kif2a	3150.73	986.212	0.31301	4.64923e-34
ENSMUSG00000058756	Thra	2034.27	637.003	0.313136	3.94795e-25
ENSMUSG00000028383	Hsdl2	3518.7	1102	0.313183	1.00181e-33
ENSMUSG00000024421	Lama3	12461.2	3902.98	0.313212	5.49982e-23
ENSMUSG00000073576	9630014M24Rik	22.9769	7.19915	0.313321	0.00402199
ENSMUSG00000030532	Hddc3	281.505	88.2228	0.313397	3.14001e-10
ENSMUSG00000042389	Tsen2	564.705	176.987	0.313415	1.73998e-14
ENSMUSG00000037234	Hook3	6456.18	2024.23	0.313534	1.51309e-38
ENSMUSG00000021832	Psmc6	9978.3	3133.46	0.314028	3.53294e-39
ENSMUSG00000060002	Chpt1	1380.81	433.626	0.314038	2.73101e-24
ENSMUSG00000054894	Atp5s	424.36	133.407	0.314371	3.47981e-12
ENSMUSG00000023092	Fhl1	1509.32	474.511	0.314386	1.75731e-20
ENSMUSG00000027430	Dtd1	818.936	257.496	0.314428	1.29388e-17
ENSMUSG00000073293	Nudt10	219.787	69.1237	0.314503	1.29549e-08
ENSMUSG00000062704	9430002A10Rik	9.11843	2.86783	0.31451	0.0546092
ENSMUSG00000042694	Obfc1	585.431	184.143	0.314543	3.58099e-15
ENSMUSG00000038742	Angptl6	883.002	277.765	0.314568	2.27028e-17
ENSMUSG00000046785	Epm2aip1	3758.23	1182.49	0.314641	4.89667e-35
ENSMUSG00000068874	Selenbp1	637.048	200.536	0.314789	1.15179e-11
ENSMUSG00000035692	Isg15	4114.89	1295.43	0.314816	3.28935e-09
ENSMUSG00000020173	Cobl	5843.5	1841.74	0.315177	4.13464e-37
ENSMUSG00000056121	Fez2	1200.86	378.777	0.315422	1.85715e-20
ENSMUSG00000037541	Shank2	3378.48	1065.8	0.315466	2.38707e-31
ENSMUSG00000054967	Zfp647	77.6227	24.4922	0.315528	5.0406e-06
ENSMUSG00000057457	Phex	478.531	151.15	0.315862	1.50682e-11
ENSMUSG00000026737	Pip4k2a	4336.32	1369.77	0.315882	3.79244e-36
ENSMUSG00000047181	Samd14	7749.58	2448.5	0.315952	1.62408e-38
ENSMUSG00000062861	Zfp28	537.555	169.869	0.316002	1.18263e-14
ENSMUSG00000048142	Nat8l	429.467	135.76	0.316112	7.22516e-11
ENSMUSG00000044167	Foxo1	3220.65	1018.1	0.316117	5.14204e-33
ENSMUSG00000038740	Fam125b	2656.32	839.758	0.316136	3.13773e-31
ENSMUSG00000025086	Trub1	1404.87	444.175	0.316169	1.13996e-23
ENSMUSG00000039105	Atp6v1g1	9002.12	2846.5	0.316203	1.10644e-38
ENSMUSG00000092074	Dynlt1a	19.7107	6.23424	0.316287	0.00617366
ENSMUSG00000078863	Gm14325	244.168	77.2339	0.316315	2.83317e-09
ENSMUSG00000035364	4930524J08Rik	37.926	11.9968	0.316321	0.000448719
ENSMUSG00000004665	Cnn2	5318.45	1682.69	0.316388	6.89042e-38
ENSMUSG00000032875	Arhgef17	6805.95	2153.73	0.316448	2.86803e-38
ENSMUSG00000049421	Zfp260	3293.3	1042.63	0.316591	1.05095e-33
ENSMUSG00000037685	Atp8a1	3002.24	950.935	0.316742	8.86512e-33
ENSMUSG00000091625	Lsm5	832.314	263.935	0.317109	3.89989e-17
ENSMUSG00000020089	Ppa1	5990.85	1900.26	0.317194	2.84716e-37
ENSMUSG00000019804	Snx3	8459.48	2686.68	0.317594	2.61111e-38
ENSMUSG00000048720	Tbc1d12	552.672	175.545	0.31763	2.15744e-14
ENSMUSG00000017774	Myo1c	10664.9	3387.52	0.317634	1.8793e-38
ENSMUSG00000021714	Cenpk	237.91	75.7543	0.318415	3.68249e-09
ENSMUSG00000026637	Traf5	684.098	217.85	0.318449	9.36886e-16
ENSMUSG00000039096	Rsad1	1331.19	424.025	0.31853	9.68642e-21
ENSMUSG00000039683	Sdk1	2570.94	818.976	0.318551	1.57106e-28
ENSMUSG00000047735	Samd9l	2562.81	816.531	0.318608	6.57376e-09
ENSMUSG00000084883	Ccdc85c	703.117	224.063	0.318671	8.13689e-14
ENSMUSG00000052419	2610001J05Rik	1421.17	452.908	0.318687	1.45099e-23
ENSMUSG00000031323	Dmrtc1a	75.3606	24.0205	0.31874	1.04896e-05
ENSMUSG00000067870	Gm8759	156.509	49.8901	0.318769	1.50864e-08
ENSMUSG00000028229	Fam82b	898.297	286.379	0.318802	7.03782e-18
ENSMUSG00000026383	Epb4.1l5	3450.79	1100.47	0.318904	8.71236e-33
ENSMUSG00000027165	B230118H07Rik	946.421	301.925	0.319017	1.69281e-18
ENSMUSG00000042042	Csgalnact2	1333.1	425.328	0.319052	1.09427e-22
ENSMUSG00000020205	Phlda1	1530.15	488.427	0.319201	5.27552e-06
ENSMUSG00000032050	Rdx	10835.4	3459.11	0.319242	6.82183e-38
ENSMUSG00000022911	Arl13b	2788.03	890.324	0.319338	4.04505e-06
ENSMUSG00000067430	Zfp763	331.513	105.912	0.319481	1.53073e-11
ENSMUSG00000051043	Gprc5c	1360.15	434.779	0.319656	1.89689e-22
ENSMUSG00000019487	Trip10	2064.39	659.899	0.319658	3.54181e-29
ENSMUSG00000033316	Galnt9	317.822	101.645	0.319819	3.74258e-10
ENSMUSG00000037075	Rnf139	2497.5	798.896	0.319878	6.39594e-30
ENSMUSG00000034667	Xpot	7532.45	2409.57	0.319892	1.05374e-37
ENSMUSG00000019856	Fam184a	108.077	34.5753	0.319914	2.53108e-06
ENSMUSG00000063931	Pepd	9160.7	2931.2	0.319976	2.36039e-21
ENSMUSG00000027560	Dok5	301.248	96.4944	0.320315	6.93908e-10
ENSMUSG00000040151	Hs2st1	7943.98	2545.43	0.320422	9.13191e-38
ENSMUSG00000071064	Zfp827	1861.45	596.466	0.320431	7.82084e-27
ENSMUSG00000035283	Adrb1	352.152	112.849	0.320456	2.22007e-08
ENSMUSG00000074579	Lekr1	176.581	56.596	0.32051	3.87165e-08
ENSMUSG00000043881	Kbtbd7	1821.49	584.159	0.320704	2.29472e-26
ENSMUSG00000078153	Psme2b-ps	40.3823	12.9509	0.320708	0.00124219
ENSMUSG00000059363	Fxn	476.787	153.004	0.320907	7.24541e-13
ENSMUSG00000048520	Fbxl13	112.158	36.0226	0.321177	6.40797e-07
ENSMUSG00000032030	Cul5	3693.09	1186.37	0.321241	6.93574e-34
ENSMUSG00000026192	Atic	7673.95	2465.9	0.321334	1.52556e-37
ENSMUSG00000078898	Gm4723	13.4104	4.30981	0.321378	0.0226707
ENSMUSG00000040928	S100pbp	2126.84	683.618	0.321424	3.09213e-27
ENSMUSG00000031591	Asah1	5431.81	1746.15	0.321468	3.87276e-36
ENSMUSG00000025246	Tbl1x	13933.2	4479.3	0.321483	4.17428e-37
ENSMUSG00000038587	Akap12	14992.2	4821.28	0.321585	1.31376e-33
ENSMUSG00000001497	Pax9	8456.87	2724.36	0.322148	1.04847e-23
ENSMUSG00000030340	Scnn1a	11826	3813.17	0.322439	9.5833e-38
ENSMUSG00000034349	Smc4	8678.6	2799.27	0.322549	6.03782e-29
ENSMUSG00000034833	Tespa1	141.219	45.5534	0.322572	5.64518e-07
ENSMUSG00000034485	Uaca	2812.11	907.482	0.322705	1.9576e-29
ENSMUSG00000063388	BC023105	777.302	251	0.322912	0.00815873
ENSMUSG00000024253	Dync2li1	1845.72	596.296	0.323069	7.83424e-26
ENSMUSG00000021379	Id4	1072.38	346.947	0.323529	1.94817e-20
ENSMUSG00000015127	Unkl	3344.22	1082.12	0.323579	1.40837e-31
ENSMUSG00000071866	Ppia	177.909	57.5986	0.323753	7.38687e-05
ENSMUSG00000026096	Osgepl1	427.238	138.606	0.324424	2.47874e-12
ENSMUSG00000011832	Evi5l	1812.16	588.067	0.324512	7.66443e-25
ENSMUSG00000042109	Csdc2	662.006	215.015	0.324793	1.89386e-12
ENSMUSG00000044749	Abca6	50.2674	16.3281	0.324825	0.000217185
ENSMUSG00000041702	Btbd7	3249.55	1055.77	0.324898	3.8078e-32
ENSMUSG00000032558	Nphp3	1693.2	550.436	0.325086	1.95625e-11
ENSMUSG00000035064	Eef2k	1962.09	637.952	0.325139	4.06721e-28
ENSMUSG00000069114	Zbtb10	2511.15	817.064	0.325374	0.00620939
ENSMUSG00000023919	Cenpq	876.514	285.376	0.325581	3.49725e-16
ENSMUSG00000029208	Guf1	1461.23	476.548	0.326129	4.1776e-23
ENSMUSG00000039323	Igfbp2	1354.27	441.742	0.326185	8.86189e-12
ENSMUSG00000036867	Smad6	496.87	162.144	0.326331	3.5797e-13
ENSMUSG00000055148	Klf2	3889.18	1269.78	0.326489	1.27903e-12
ENSMUSG00000079451	Tmprss11g	77.7738	25.4033	0.32663	3.07323e-05
ENSMUSG00000043929	Klhl15	855.804	279.565	0.32667	1.25386e-17
ENSMUSG00000018846	Pank3	7099.35	2320.99	0.32693	3.12959e-25
ENSMUSG00000004085	B230120H23Rik	4640.98	1517.53	0.326985	1.375e-24
ENSMUSG00000024145	Pigf	707.204	231.246	0.326987	1.15728e-15
ENSMUSG00000021796	Bmpr1a	7223.82	2363.1	0.327127	2.92979e-29
ENSMUSG00000066026	Dhrs3	4508.81	1475.56	0.327261	1.94571e-17
ENSMUSG00000058230	Grlf1	6494.62	2129.32	0.327859	6.32808e-36
ENSMUSG00000002325	Irf9	5478.4	1798.32	0.328257	1.43551e-35
ENSMUSG00000041417	Pik3r1	8121.43	2666.22	0.328295	2.46106e-36
ENSMUSG00000051444	Bbs12	337.257	110.791	0.328504	1.18382e-10
ENSMUSG00000031754	Nudt21	2487.88	817.43	0.328565	1.93808e-29
ENSMUSG00000039987	Phtf2	1601.85	527.103	0.32906	4.7848e-16
ENSMUSG00000021835	Bmp4	55.2882	18.2257	0.329648	0.000135507
ENSMUSG00000036452	Arhgap26	3651.46	1204.05	0.329744	2.45302e-32
ENSMUSG00000042558	Adprhl2	2962.13	976.751	0.329746	1.76786e-29
ENSMUSG00000012076	Brms1l	1449.31	478.252	0.329987	7.50717e-23
ENSMUSG00000033308	Dpyd	3235.81	1068.97	0.330357	9.54382e-21
ENSMUSG00000050530	Fam171a1	1971.46	651.434	0.330432	1.91241e-26
ENSMUSG00000080316	Ncrna00085	214.804	70.9836	0.330457	0.00328677
ENSMUSG00000005533	Igf1r	5696.88	1883.3	0.330584	7.54003e-35
ENSMUSG00000011837	Snapc2	1784.98	590.244	0.330673	1.02971e-20
ENSMUSG00000018415	4933439F18Rik	2590.82	857.228	0.330871	6.73143e-30
ENSMUSG00000026785	Pkn3	323.409	107.028	0.330936	3.53447e-08
ENSMUSG00000034645	Zyg11a	52.1246	17.25	0.330938	0.00166695
ENSMUSG00000039063	Echdc3	313.185	103.645	0.330939	9.68055e-10
ENSMUSG00000059689	Zfp637	968.102	320.391	0.330947	7.59467e-19
ENSMUSG00000034575	Papd7	2061.19	682.337	0.33104	2.14264e-27
ENSMUSG00000044148	1810030O07Rik	3457.61	1145.01	0.331157	2.71118e-31
ENSMUSG00000026535	Ifi202b	994.992	329.687	0.331346	0.0399396
ENSMUSG00000031508	Ankrd10	2366.72	784.718	0.331564	5.15202e-14
ENSMUSG00000028518	Prkaa2	2693.84	893.514	0.331687	2.75403e-27
ENSMUSG00000020716	Nf1	6048.65	2008.56	0.332067	1.17778e-23
ENSMUSG00000068749	Psma5	3443.26	1144.23	0.332311	1.83033e-30
ENSMUSG00000049354	Dcaf7	11305.5	3759.27	0.332516	1.7382e-35
ENSMUSG00000034620	Tmem5	1787.51	594.456	0.332561	2.95133e-25
ENSMUSG00000040562	Gstm2	1618.54	538.333	0.332604	1.6588e-20
ENSMUSG00000037001	Zfp39	429.64	142.911	0.332628	1.66606e-11
ENSMUSG00000045896	Paip2b	2532.97	843.007	0.332813	2.63074e-28
ENSMUSG00000000340	Dbt	2648.62	881.564	0.332839	3.21523e-28
ENSMUSG00000037692	Ahdc1	4103.72	1366.26	0.332933	1.5953e-20
ENSMUSG00000045114	Prrt2	14.4361	4.80839	0.33308	0.0240669
ENSMUSG00000026181	Ppm1f	1885.65	628.416	0.333262	6.86279e-26
ENSMUSG00000059975	Zfp74	627.546	209.166	0.333308	3.61218e-14
ENSMUSG00000025477	Inpp5a	4803.57	1601.75	0.33345	2.30405e-33
ENSMUSG00000027351	Spred1	3156.19	1052.49	0.333467	2.29783e-30
ENSMUSG00000027750	Postn	513.53	171.354	0.333678	1.50703e-14
ENSMUSG00000009566	Fpgs	937.356	312.849	0.333757	1.94698e-17
ENSMUSG00000024462	Gabbr1	2518.3	842.819	0.334678	0.000109324
ENSMUSG00000060301	2610008E11Rik	1668.18	558.306	0.334679	1.52689e-24
ENSMUSG00000006442	Srm	2305.77	771.696	0.33468	6.04836e-22
ENSMUSG00000001100	Poldip2	3688.03	1234.47	0.334722	2.61782e-31
ENSMUSG00000048644	Ctxn1	455.56	152.517	0.33479	1.76628e-12
ENSMUSG00000026620	Mark1	2280.65	763.555	0.334797	2.99465e-26
ENSMUSG00000035960	Apex1	1310.59	438.868	0.334864	1.02056e-22
ENSMUSG00000028609	Magoh	2707.43	907.333	0.335127	9.93304e-30
ENSMUSG00000074664	A830092H15Rik	134.39	45.0656	0.335334	3.16312e-06
ENSMUSG00000026883	Dab2ip	7131.85	2393.27	0.335575	1.53498e-34
ENSMUSG00000026088	Mitd1	697.81	234.216	0.335645	4.36467e-16
ENSMUSG00000026014	Raph1	2031.15	681.763	0.335654	2.02532e-19
ENSMUSG00000025538	Sumf2	784.762	263.436	0.335689	2.61609e-15
ENSMUSG00000035992	Fnip1	3228.29	1083.97	0.335774	1.26199e-08
ENSMUSG00000058013	Sept11	8843.21	2971.22	0.335988	4.40175e-35
ENSMUSG00000071855	Ccdc112	811.82	272.833	0.336075	1.38327e-16
ENSMUSG00000024669	Cd5	215.392	72.404	0.33615	2.21611e-05
ENSMUSG00000031644	Nek1	2927.94	985.007	0.336416	3.24924e-29
ENSMUSG00000033411	Ctdspl2	2263.9	761.65	0.336433	9.88744e-28
ENSMUSG00000044442	N6amt1	1000.38	336.719	0.336593	5.91368e-18
ENSMUSG00000001098	Kctd10	7201.37	2424	0.336603	1.8717e-34
ENSMUSG00000023330	Dtwd1	364.548	122.803	0.336865	1.17493e-10
ENSMUSG00000049916	2610318N02Rik	103.887	35.0201	0.337096	6.41916e-06
ENSMUSG00000033808	Tmem87a	5029.39	1695.68	0.337154	9.64617e-26
ENSMUSG00000034560	A230046K03Rik	3536.37	1192.81	0.337297	7.11371e-31
ENSMUSG00000036411	9530077C05Rik	105.108	35.4864	0.33762	6.13149e-06
ENSMUSG00000092299	Psmb9	11822.1	3991.76	0.337651	9.56871e-35
ENSMUSG00000047412	Zbtb44	2778.3	938.178	0.337681	4.21149e-29
ENSMUSG00000056999	Ide	12802.6	4323.51	0.337706	1.23984e-34
ENSMUSG00000063364	3300002I08Rik	32.7162	11.0534	0.337857	0.00138286
ENSMUSG00000090853	Gm17364	49.6682	16.7998	0.338241	0.00392484
ENSMUSG00000037361	0610009D07Rik	4944.62	1672.64	0.338276	5.99592e-33
ENSMUSG00000028399	Ptprd	2562.62	867.059	0.338348	4.16604e-09
ENSMUSG00000006958	Chrd	452.363	153.069	0.338376	0.00386169
ENSMUSG00000043008	Klhl6	272.127	92.0878	0.3384	1.60312e-08
ENSMUSG00000041598	Cdc42ep4	6278.3	2125	0.338467	1.91601e-33
ENSMUSG00000031969	Acad8	1506.07	509.911	0.338571	8.06815e-22
ENSMUSG00000020464	Pnpt1	1875.43	635.036	0.338608	8.63593e-24
ENSMUSG00000025082	Vwa2	359.873	121.919	0.338784	1.99609e-10
ENSMUSG00000035183	Slc24a5	850.524	288.153	0.338794	4.67509e-17
ENSMUSG00000030861	Acadsb	4941.55	1674.76	0.338913	1.59509e-32
ENSMUSG00000033632	AW554918	915.946	310.892	0.339422	1.14798e-17
ENSMUSG00000006728	Cdk4	10220.7	3469.72	0.339481	5.52446e-34
ENSMUSG00000038936	Sccpdh	1790.91	608.378	0.339703	2.08511e-24
ENSMUSG00000025089	Gfra1	1042.91	354.468	0.339883	2.34249e-17
ENSMUSG00000022528	Hes1	1089.03	370.453	0.340167	1.92817e-20
ENSMUSG00000028173	Wls	10576.2	3599.58	0.340349	2.58962e-34
ENSMUSG00000027332	Ivd	4325.76	1472.7	0.34045	4.54063e-31
ENSMUSG00000031517	Gpm6a	347.801	118.472	0.340632	9.1196e-10
ENSMUSG00000030341	Tnfrsf1a	5916.98	2017.52	0.340971	5.0289e-33
ENSMUSG00000055737	Ghr	1370.99	467.88	0.341271	4.5034e-21
ENSMUSG00000037014	Sstr4	29.4931	10.0777	0.341698	0.0451375
ENSMUSG00000054008	Ndst1	4466.02	1526.46	0.341794	1.7146e-31
ENSMUSG00000053007	Creb5	70.124	23.9774	0.341929	0.0362747
ENSMUSG00000002957	Ap2a2	7157.61	2447.68	0.341969	1.30122e-33
ENSMUSG00000028035	Dnajb4	1890.58	646.813	0.342124	1.87415e-05
ENSMUSG00000029469	Ift81	1826	624.985	0.34227	1.80291e-23
ENSMUSG00000032846	Zswim6	1647.65	564.272	0.342471	3.4082e-07
ENSMUSG00000028690	Mmachc	574.169	196.655	0.342503	3.49038e-13
ENSMUSG00000001833	Sept7	9794.12	3355	0.342552	7.03349e-34
ENSMUSG00000022476	Polr3h	1282.82	439.72	0.342777	8.15733e-20
ENSMUSG00000005718	Tfap4	409.584	140.396	0.342777	8.45854e-12
ENSMUSG00000033170	Card10	2085.56	714.994	0.342831	5.9998e-24
ENSMUSG00000029415	Sdad1	2185.79	749.799	0.343034	1.53679e-26
ENSMUSG00000036768	Kif15	1181.16	405.215	0.343065	1.29562e-09
ENSMUSG00000028637	Ccdc30	479.503	164.546	0.343159	1.54154e-11
ENSMUSG00000003929	Zfp81	646.895	222.096	0.343326	1.08161e-14
ENSMUSG00000047388	Atmin	3647	1254.11	0.343874	3.67732e-27
ENSMUSG00000028522	Mier1	4439.48	1526.87	0.343929	2.48353e-12
ENSMUSG00000039585	Myo9a	3528.9	1215.11	0.34433	9.11784e-24
ENSMUSG00000066037	Hnrnpr	5844.01	2012.42	0.344357	4.84932e-33
ENSMUSG00000004843	Chmp2b	5849.02	2014.35	0.344392	1.00846e-32
ENSMUSG00000037921	Ddx60	1333.19	459.416	0.344599	0.00360752
ENSMUSG00000020695	Mrc2	778.483	268.512	0.344917	3.44935e-06
ENSMUSG00000047415	Gpr68	3305.54	1140.27	0.344959	3.48362e-16
ENSMUSG00000024269	5730494M16Rik	977.302	337.212	0.345044	9.71451e-17
ENSMUSG00000033610	Pank1	736.579	254.248	0.345174	1.28138e-14
ENSMUSG00000005802	Slc30a4	2671	922.246	0.345282	4.84745e-27
ENSMUSG00000032252	Glce	2195.09	757.936	0.345287	1.13196e-25
ENSMUSG00000022948	Setd4	295.612	102.176	0.345643	3.81122e-09
ENSMUSG00000038486	Sv2a	154.247	53.3264	0.345722	8.34606e-07
ENSMUSG00000079076	Gm3086	13.9233	4.81377	0.345735	0.0379269
ENSMUSG00000028114	Mettl14	2449.58	847.231	0.345868	1.39129e-26
ENSMUSG00000009035	Tmem184b	7353.52	2545.2	0.346121	7.41881e-31
ENSMUSG00000032085	Tagln	949.639	328.716	0.346149	2.08121e-27
ENSMUSG00000032459	Mrps22	958.142	331.659	0.346149	2.27618e-17
ENSMUSG00000037628	Cdkn3	199.606	69.1183	0.346273	5.73866e-08
ENSMUSG00000026842	Abl1	7308.42	2530.89	0.346297	4.10974e-33
ENSMUSG00000047264	Zfp358	749.006	259.448	0.346389	1.11644e-16
ENSMUSG00000074682	Zcchc3	461.077	159.721	0.346409	3.10149e-11
ENSMUSG00000019927	Ube2d1	774.272	268.218	0.346413	6.86148e-17
ENSMUSG00000030161	Gabarapl1	3648.89	1264.13	0.346441	4.6524e-29
ENSMUSG00000023147	Wrb	726.979	251.868	0.346458	6.91227e-14
ENSMUSG00000060572	Mfap2	55.245	19.1422	0.346496	0.000258637
ENSMUSG00000027394	Ttl	1325.7	459.619	0.3467	1.9247e-19
ENSMUSG00000026571	Dcaf6	1987.37	689.219	0.346799	5.43203e-24
ENSMUSG00000026701	Prdx6	4812.23	1669.11	0.346847	3.61168e-32
ENSMUSG00000020393	Kremen1	7410.62	2570.79	0.346907	6.35255e-30
ENSMUSG00000047757	Fancb	273.272	94.8911	0.34724	1.17514e-08
ENSMUSG00000034593	Myo5a	3114.09	1081.46	0.347278	3.56692e-28
ENSMUSG00000022466	Rpap3	1276.69	443.435	0.347331	3.55567e-20
ENSMUSG00000020086	H2afy2	5011.27	1741.06	0.347428	3.64559e-32
ENSMUSG00000014554	Dguok	1270.09	441.453	0.347575	5.39086e-20
ENSMUSG00000045690	Wdr89	299.315	104.058	0.347653	3.56516e-09
ENSMUSG00000032018	Sc5d	5253.66	1827.15	0.347786	1.39329e-31
ENSMUSG00000027163	Commd9	1862.18	647.73	0.347835	8.3796e-23
ENSMUSG00000021371	Ccdc90a	1822.95	634.21	0.347903	1.05362e-22
ENSMUSG00000022010	Tsc22d1	46520.3	16185	0.347913	7.49578e-25
ENSMUSG00000040699	Limd2	2647.75	921.199	0.347917	5.93669e-27
ENSMUSG00000031198	Fundc2	1879.96	654.076	0.347921	3.52139e-24
ENSMUSG00000050295	Foxc1	1279.71	445.243	0.347924	1.77885e-19
ENSMUSG00000049119	Fam110b	783.893	272.865	0.348089	3.16836e-14
ENSMUSG00000027860	Vangl1	2188.59	761.838	0.348095	6.39924e-26
ENSMUSG00000010051	Hyal1	475.567	165.559	0.348129	0.000365033
ENSMUSG00000014361	Mertk	215.079	74.8916	0.348204	1.03913e-05
ENSMUSG00000026117	Zap70	295.984	103.173	0.348578	1.80602e-08
ENSMUSG00000020642	Rnf144a	286.218	99.8124	0.348729	6.90497e-09
ENSMUSG00000038570	Fam154b	288.772	100.783	0.349005	1.77403e-09
ENSMUSG00000030283	St8sia1	241.824	84.4116	0.349062	1.46408e-08
ENSMUSG00000022247	Brix1	2358.49	823.399	0.349122	1.41509e-26
ENSMUSG00000078716	Tmem8b	592.001	206.77	0.349273	4.19337e-13
ENSMUSG00000029279	Brdt	247.234	86.3737	0.34936	7.90802e-05
ENSMUSG00000025041	Nt5c2	2315.17	808.947	0.349412	4.56846e-26
ENSMUSG00000020175	Rab36	601.287	210.142	0.349487	3.46519e-12
ENSMUSG00000037784	Dzip1l	1323.21	462.986	0.349896	9.7093e-20
ENSMUSG00000028228	Cpne3	5488.6	1920.67	0.349939	4.16184e-32
ENSMUSG00000034487	Kdelc2	1074.46	376.033	0.349973	4.79044e-19
ENSMUSG00000026020	Nop58	4568.8	1600.01	0.350204	5.79426e-15
ENSMUSG00000027506	Tpd52	7701.91	2697.88	0.350287	1.71289e-32
ENSMUSG00000037270	4932438A13Rik	12456.1	4364.26	0.350373	2.64582e-24
ENSMUSG00000027122	2700007P21Rik	1763.54	617.904	0.350376	4.47615e-23
ENSMUSG00000019082	Slc25a22	1746.1	611.858	0.350413	7.21234e-22
ENSMUSG00000044991	1110034G24Rik	404.061	141.608	0.350463	2.0315e-10
ENSMUSG00000029094	Afap1	2214.73	776.751	0.350721	1.84935e-10
ENSMUSG00000043895	S1pr2	1142.01	400.659	0.350838	1.89796e-19
ENSMUSG00000053091	Lins	745.087	261.426	0.350866	3.92334e-14
ENSMUSG00000021938	Pspc1	2717.83	953.7	0.350905	3.64603e-27
ENSMUSG00000020706	Ftsj3	4323.07	1517.15	0.350942	1.41633e-30
ENSMUSG00000054708	Ankrd24	1707.55	599.362	0.351007	4.3439e-21
ENSMUSG00000070601	Vmn2r84	8.20063	2.87858	0.35102	0.0985164
ENSMUSG00000022034	Esco2	398.803	140.016	0.35109	7.20473e-08
ENSMUSG00000030138	Bms1	6318.58	2219.99	0.351343	7.39194e-32
ENSMUSG00000019854	Reps1	8580.39	3018.74	0.351818	2.38792e-32
ENSMUSG00000039046	Usp6nl	2331.85	820.439	0.351841	7.66011e-26
ENSMUSG00000026482	Rgl1	2008.77	706.786	0.35185	1.24088e-21
ENSMUSG00000063816	Gm4987	87.2756	30.7103	0.351877	4.96717e-05
ENSMUSG00000018899	Irf1	30076	10587	0.352007	0.0114996
ENSMUSG00000005871	Apc	10050.5	3540.06	0.352227	2.25681e-28
ENSMUSG00000030600	Lrfn1	147.017	51.8145	0.352438	0.0188384
ENSMUSG00000031402	Mpp1	2771.2	976.778	0.352475	4.71095e-26
ENSMUSG00000044177	Wfikkn2	3443.29	1214.19	0.352624	0.000177695
ENSMUSG00000035615	Frmpd1	760.112	268.175	0.352809	4.95721e-14
ENSMUSG00000041215	Yeats2	3539.94	1249.53	0.352981	7.48863e-29
ENSMUSG00000038241	Cep250	3341.43	1180.01	0.353145	2.96104e-12
ENSMUSG00000053931	Cnn3	36558.9	12911	0.353155	4.26639e-25
ENSMUSG00000022945	Chaf1b	435.984	154.007	0.35324	1.69627e-11
ENSMUSG00000042446	Zmym4	4333.4	1531.04	0.35331	5.35065e-30
ENSMUSG00000022051	Bnip3l	32531	11495	0.353357	7.13906e-26
ENSMUSG00000000555	Itga5	1143.39	404.358	0.353647	4.61354e-18
ENSMUSG00000089824	Rbm12	2683.72	949.208	0.353691	5.40059e-27
ENSMUSG00000030814	Bcl7c	3975.69	1406.21	0.353703	1.69872e-25
ENSMUSG00000032002	Dcun1d5	3598.24	1273.11	0.353815	4.79104e-29
ENSMUSG00000071077	Gm9104	8.11428	2.87321	0.354093	0.0985205
ENSMUSG00000049047	Armcx3	2208.55	782.754	0.354419	1.08452e-24
ENSMUSG00000021417	Eci2	2742.9	972.173	0.354432	1.43081e-26
ENSMUSG00000070814	6330408A02Rik	653.584	231.664	0.354452	4.99424e-13
ENSMUSG00000040139	9430038I01Rik	235.411	83.4843	0.354632	5.32094e-08
ENSMUSG00000031657	Heatr3	1923.98	682.659	0.354817	2.7613e-23
ENSMUSG00000046574	Prr12	7076.69	2511.74	0.354931	1.28753e-31
ENSMUSG00000025001	Hells	1291.15	458.321	0.354971	4.18364e-07
ENSMUSG00000024906	Mus81	2191.26	777.93	0.355015	1.89998e-24
ENSMUSG00000027550	Lrrcc1	1748.12	620.626	0.355025	1.06268e-09
ENSMUSG00000041216	Clvs1	416.133	147.751	0.355058	2.63139e-10
ENSMUSG00000039357	Fut11	1170.48	415.834	0.355267	1.35512e-18
ENSMUSG00000022421	Nptxr	197.263	70.0993	0.355359	0.00499026
ENSMUSG00000071083	Gm10311	36.3873	12.9348	0.355476	0.00134231
ENSMUSG00000021413	Prpf4b	6798.99	2417.22	0.355526	9.81353e-15
ENSMUSG00000010911	Apip	673.079	239.303	0.355534	2.19762e-14
ENSMUSG00000052155	Acvr2a	1355.06	482.182	0.355838	2.8343e-18
ENSMUSG00000069196	Gm3511	21.5031	7.65472	0.355982	0.0369703
ENSMUSG00000054115	Skp2	781.469	278.236	0.356043	2.68523e-15
ENSMUSG00000021411	1300014I06Rik	553.8	197.18	0.35605	4.90627e-06
ENSMUSG00000090093	Gm14399	67.2895	23.9613	0.356093	9.55275e-05
ENSMUSG00000020580	Rock2	6080.78	2166.77	0.356331	1.363e-27
ENSMUSG00000021062	Rab15	9941.26	3542.78	0.356371	1.31464e-31
ENSMUSG00000015961	Adss	9759.95	3478.24	0.356379	1.2469e-31
ENSMUSG00000051499	Zfp786	80.7268	28.7697	0.356384	0.00561863
ENSMUSG00000030319	Cand2	423.723	151.091	0.356579	1.40925e-10
ENSMUSG00000009681	Bcr	7266.66	2591.26	0.356595	1.97058e-31
ENSMUSG00000072694	1500011B03Rik	286.391	102.144	0.35666	8.96769e-09
ENSMUSG00000001288	Rarg	2411.71	860.623	0.356851	3.78361e-25
ENSMUSG00000012296	Tjap1	3775.79	1348.53	0.357153	5.41857e-28
ENSMUSG00000034278	Dnajc17	978.268	349.568	0.357333	1.2845e-15
ENSMUSG00000058736	Gm10047	13.4536	4.80839	0.357406	0.0326146
ENSMUSG00000028223	Decr1	3199.28	1144.3	0.357673	1.80315e-26
ENSMUSG00000027956	Tmem144	183.713	65.7626	0.357964	4.96897e-07
ENSMUSG00000074824	Zfp708	71.0902	25.4517	0.358019	9.1365e-05
ENSMUSG00000023826	Park2	230.287	82.4872	0.358192	1.12456e-07
ENSMUSG00000031652	N4bp1	3119.54	1117.72	0.358297	6.84093e-27
ENSMUSG00000034194	R3hcc1	1440.65	516.3	0.358381	2.42289e-20
ENSMUSG00000068566	Myadm	1183.86	424.433	0.358517	1.04499e-19
ENSMUSG00000026047	Kdelc1	1011.25	362.696	0.35866	1.26432e-18
ENSMUSG00000018750	Zbtb4	3010.41	1080.21	0.358825	5.08594e-27
ENSMUSG00000025025	Mxi1	2067.36	741.833	0.358832	1.9667e-22
ENSMUSG00000022199	Slc22a17	1101.66	395.347	0.358866	0.000123413
ENSMUSG00000030753	Prkrir	3465.62	1243.79	0.358893	2.06166e-28
ENSMUSG00000071103	1700029J07Rik	421.192	151.257	0.359118	2.46591e-07
ENSMUSG00000059897	Zfp930	383.417	137.695	0.359126	2.43776e-10
ENSMUSG00000027475	Kif3b	7157.21	2572.39	0.359413	8.95617e-31
ENSMUSG00000042345	Ubash3a	146.823	52.7848	0.359513	0.00419362
ENSMUSG00000038416	Cdc16	5047.88	1815.36	0.359628	5.53762e-30
ENSMUSG00000068115	Ninl	608.127	218.703	0.359633	1.06256e-09
ENSMUSG00000000934	Top1mt	1034.42	372.023	0.359644	4.78502e-17
ENSMUSG00000021390	Ogn	240.07	86.3683	0.359763	2.60319e-07
ENSMUSG00000040785	Ttc3	13901	5003.66	0.35995	7.77147e-30
ENSMUSG00000024974	Smc3	6609.51	2379.41	0.359998	7.23563e-31
ENSMUSG00000039178	Tbc1d19	1427.07	513.814	0.360047	3.07533e-15
ENSMUSG00000014850	Msh3	1205.73	434.141	0.360066	1.8629e-18
ENSMUSG00000030103	Bhlhe40	6805.83	2450.68	0.360085	0.0430191
ENSMUSG00000075590	Nrbp2	2346.71	845.199	0.360163	0.0125346
ENSMUSG00000021395	Spin1	9067.16	3266.08	0.36021	4.90457e-31
ENSMUSG00000041058	Wwp1	3356	1209.02	0.360255	1.56927e-23
ENSMUSG00000044927	H1fx	294.257	106.068	0.360462	2.60194e-08
ENSMUSG00000022449	Adamts20	389.787	140.509	0.360476	1.13597e-06
ENSMUSG00000036960	Clca5	1315.3	474.168	0.360502	9.64538e-08
ENSMUSG00000039286	Fndc3b	4724.65	1704.96	0.360865	2.95285e-19
ENSMUSG00000027935	Rab13	391.936	141.479	0.360976	1.07152e-10
ENSMUSG00000031066	Usp11	4028.53	1454.28	0.360996	1.1948e-28
ENSMUSG00000024583	Txnl1	5243.98	1893.56	0.361092	8.5791e-30
ENSMUSG00000038507	Parp12	2830.97	1022.57	0.361209	2.82377e-16
ENSMUSG00000067916	Gm13139	264.218	95.465	0.361311	1.52196e-08
ENSMUSG00000017561	Crlf3	2363.79	854.43	0.361466	5.19247e-24
ENSMUSG00000025612	Bach1	10451.3	3780.94	0.361766	6.92315e-17
ENSMUSG00000040253	Gbp7	2388.13	864.079	0.361823	0.000789633
ENSMUSG00000074121	Ntf5	714.654	258.628	0.361892	9.62535e-14
ENSMUSG00000027339	Rassf2	23503.9	8506.13	0.361903	2.55735e-28
ENSMUSG00000037490	Slc2a12	304.919	110.356	0.36192	1.52603e-08
ENSMUSG00000029007	Agtrap	2319.58	839.876	0.362081	1.27713e-23
ENSMUSG00000052684	Jun	52528.5	19020.5	0.362099	0.00116062
ENSMUSG00000023027	Atf1	3145.11	1138.95	0.362135	1.2707e-26
ENSMUSG00000027566	Psma7	12688.9	4596.46	0.362243	3.39487e-30
ENSMUSG00000031214	Ophn1	340.416	123.324	0.362273	2.17358e-09
ENSMUSG00000040997	Abhd4	3014.6	1092.6	0.362436	2.99465e-26
ENSMUSG00000091454	Dynlt1b	216.818	78.5953	0.362495	2.56757e-07
ENSMUSG00000044452	Zfp507	2343.45	849.948	0.362691	2.14758e-24
ENSMUSG00000051154	Commd3	2431.33	882.068	0.362793	6.72198e-25
ENSMUSG00000044217	Aqp5	322.611	117.052	0.362826	9.64866e-09
ENSMUSG00000055137	5033411D12Rik	219.485	79.6355	0.362829	3.03602e-07
ENSMUSG00000021820	Camk2g	3224.82	1170.73	0.363037	2.71632e-26
ENSMUSG00000089756	Gm8898	219.263	79.6247	0.363146	4.25619e-08
ENSMUSG00000028347	Tmeff1	826.921	300.616	0.363536	3.32178e-16
ENSMUSG00000034245	Hdac11	3627.83	1319	0.363579	2.05358e-27
ENSMUSG00000072829	Gm7292	2462.62	896.832	0.364178	1.93509e-24
ENSMUSG00000032803	Cdv3	7734.31	2817	0.364221	2.4309e-30
ENSMUSG00000049606	Zfp644	2965.6	1080.33	0.364286	9.44457e-17
ENSMUSG00000026826	Nr4a2	333.122	121.378	0.364363	0.000126112
ENSMUSG00000027778	Ift80	2373.04	865.123	0.364563	4.09713e-24
ENSMUSG00000002265	Peg3	2499.57	911.406	0.364626	2.7758e-15
ENSMUSG00000052407	4930473A06Rik	1110.33	404.921	0.364685	2.41035e-16
ENSMUSG00000027175	Tcp11l1	798.113	291.139	0.364784	1.52916e-14
ENSMUSG00000074925	Ptar1	378.715	138.156	0.364802	1.24007e-07
ENSMUSG00000031358	Msl3	2124.92	775.272	0.364848	1.33338e-23
ENSMUSG00000036862	Dchs1	257.475	94.0122	0.365131	2.35185e-08
ENSMUSG00000041440	Gk5	2177.07	795.372	0.365341	3.43348e-18
ENSMUSG00000020766	Galk1	1734.67	633.856	0.365404	5.59585e-14
ENSMUSG00000026276	Sept2	18544.1	6777.85	0.365499	9.50882e-28
ENSMUSG00000004936	Map2k1	11393.1	4164.28	0.365508	3.73107e-30
ENSMUSG00000079716	Map3k4	2181.97	797.544	0.365515	7.14063e-24
ENSMUSG00000021250	Fos	30103.7	11006.1	0.365605	0.0532906
ENSMUSG00000034848	Ttc21b	1940.63	709.584	0.365646	3.18904e-22
ENSMUSG00000024151	Msh2	3467.93	1270.18	0.366266	2.27564e-27
ENSMUSG00000037306	Man1c1	682.057	249.96	0.366479	1.23948e-12
ENSMUSG00000035199	Arl6ip5	5761.4	2111.75	0.366534	2.03082e-29
ENSMUSG00000036009	BC067068	621.592	227.858	0.366572	3.83855e-12
ENSMUSG00000063628	Gm7665	10.4843	3.84349	0.366594	0.0735288
ENSMUSG00000017144	Rnd3	3809.39	1397.07	0.366744	0.00144961
ENSMUSG00000069227	Gprin1	963.853	353.686	0.36695	1.08868e-13
ENSMUSG00000033356	Pus7l	408.963	150.094	0.36701	3.99594e-10
ENSMUSG00000029178	Klf3	3369.55	1236.73	0.367032	1.60344e-25
ENSMUSG00000032666	1700025G04Rik	9498.73	3486.49	0.367048	6.95304e-30
ENSMUSG00000035840	Lysmd3	1673.47	614.297	0.367079	1.03898e-10
ENSMUSG00000030189	Csda	8153.79	2993.63	0.367146	5.8775e-30
ENSMUSG00000026356	Dars	6242.77	2292.92	0.367291	1.4102e-29
ENSMUSG00000051989	Fam165b	783.747	287.869	0.367299	2.08039e-14
ENSMUSG00000057406	Whsc1	6722.34	2470.47	0.367501	9.30322e-30
ENSMUSG00000021573	Tppp	1811.13	666.133	0.3678	4.65897e-12
ENSMUSG00000090602	Gm5611	14.3282	5.27472	0.368135	0.0332838
ENSMUSG00000092020	Gm5176	14.3282	5.27472	0.368135	0.0331208
ENSMUSG00000074865	Zfp934	52.211	19.2228	0.368176	0.000413302
ENSMUSG00000068130	Zfp442	255.186	93.9854	0.368301	3.71633e-08
ENSMUSG00000039473	Ubn1	9846.49	3627.22	0.368377	7.14357e-30
ENSMUSG00000068882	Ssb	9399.51	3462.67	0.368389	1.07668e-29
ENSMUSG00000020059	Sycp3	50.7803	18.7081	0.368413	0.000435385
ENSMUSG00000050248	Evc2	2455.62	904.973	0.368532	1.8368e-20
ENSMUSG00000020232	Hmg20b	6696.12	2468.34	0.368622	3.05202e-29
ENSMUSG00000045679	Pqlc3	1260.42	464.916	0.368857	1.25197e-18
ENSMUSG00000026229	Psmd1	15051.7	5552.37	0.368887	1.19916e-28
ENSMUSG00000073617	Hdac4	1161.91	428.615	0.368888	2.38653e-16
ENSMUSG00000028071	Sh2d2a	215.689	79.5978	0.369039	7.53553e-07
ENSMUSG00000027811	4930579G24Rik	428.631	158.301	0.369317	6.75988e-10
ENSMUSG00000038855	Itpkb	2738.09	1011.97	0.369591	1.40539e-24
ENSMUSG00000026082	Rev1	1938.83	717.379	0.370006	2.30772e-22
ENSMUSG00000037119	D15Ertd621e	13478.8	4987.31	0.370013	4.7373e-29
ENSMUSG00000071303	Rps8-ps1	12.9623	4.79764	0.370122	0.0442013
ENSMUSG00000066551	Hmgb1	9689.27	3586.99	0.370202	2.17743e-21
ENSMUSG00000033400	Agl	4046.64	1498.14	0.370218	2.79927e-27
ENSMUSG00000053483	Usp21	1814.63	672.05	0.370351	2.22726e-16
ENSMUSG00000091515	Zfp422-rs1	12.9623	4.80302	0.370537	0.0403942
ENSMUSG00000029432	Gbas	5185.68	1922.09	0.370654	2.59969e-28
ENSMUSG00000034412	Tbc1d10a	5235.41	1940.84	0.370713	2.46535e-28
ENSMUSG00000025429	Pstpip2	4975.21	1845.07	0.370854	2.55313e-28
ENSMUSG00000031767	Nudt7	306.506	113.691	0.370924	1.06018e-08
ENSMUSG00000025489	Ifitm5	40.0585	14.8646	0.371073	0.0114846
ENSMUSG00000022800	Fyttd1	3907.62	1450.15	0.371109	2.72333e-27
ENSMUSG00000022360	Atad2	2253.92	836.707	0.371223	6.23737e-10
ENSMUSG00000025060	Slk	8931.11	3315.47	0.371227	2.3436e-22
ENSMUSG00000058331	Zfp85-rs1	94.2399	35.0255	0.371663	2.90431e-05
ENSMUSG00000050945	Zfp438	748.489	278.242	0.371738	2.46265e-13
ENSMUSG00000042523	Dnalc1	1180.99	439.03	0.371747	2.54798e-17
ENSMUSG00000030064	Frmd4b	2490.37	926.359	0.371976	3.38603e-22
ENSMUSG00000018554	Ybx2	416.527	154.945	0.371993	1.52179e-09
ENSMUSG00000059142	Zfp945	1112.76	413.985	0.372036	9.01015e-17
ENSMUSG00000061981	Flot2	3839.45	1428.58	0.37208	6.05208e-27
ENSMUSG00000025610	ORF63	1241.48	461.956	0.372102	1.26423e-10
ENSMUSG00000015750	Aph1a	5209.97	1938.66	0.372106	5.85715e-28
ENSMUSG00000039262	Prrc2b	14764.3	5496.09	0.372255	1.89086e-27
ENSMUSG00000026135	Zfp142	3348.47	1247.22	0.372474	2.69404e-25
ENSMUSG00000057497	Fam136a	1097.58	409.096	0.372724	1.5284e-16
ENSMUSG00000000568	Hnrnpd	10238.8	3817.27	0.372824	8.46015e-25
ENSMUSG00000037017	Zscan21	2374.21	885.205	0.372842	2.4627e-23
ENSMUSG00000039536	Stau1	5565.44	2075.19	0.372871	2.09803e-28
ENSMUSG00000035215	Lsm7	91.1195	34.0229	0.373388	6.22073e-05
ENSMUSG00000020978	Klhdc2	3421.03	1277.65	0.37347	3.07226e-26
ENSMUSG00000034640	Tiparp	1613.94	602.869	0.373539	0.004657
ENSMUSG00000022018	1190002H23Rik	948.24	354.324	0.373665	2.29912e-12
ENSMUSG00000037640	Zfp60	1420.1	530.924	0.373863	6.22134e-19
ENSMUSG00000075271	Ttc30a1	252.584	94.4839	0.374069	8.66573e-08
ENSMUSG00000038679	Trps1	1386.62	518.965	0.374267	5.08788e-18
ENSMUSG00000037236	Matr3	13386.3	5013.41	0.374517	3.92194e-23
ENSMUSG00000090938	Gm6905	23.0849	8.6465	0.374553	0.0111919
ENSMUSG00000025010	Ccnj	717.667	268.946	0.37475	2.89311e-13
ENSMUSG00000052387	Trpm3	930.684	348.92	0.374907	8.40764e-05
ENSMUSG00000035597	Prpf39	3740.99	1402.91	0.375011	2.08168e-08
ENSMUSG00000042364	Snx18	4533.02	1700.37	0.375107	2.72049e-27
ENSMUSG00000028949	Smarcd3	667.162	250.292	0.375159	1.23106e-12
ENSMUSG00000014426	Map3k4	3683.53	1382.26	0.375254	2.05353e-26
ENSMUSG00000063568	Jazf1	887.591	333.304	0.375515	6.74345e-14
ENSMUSG00000028933	Xrcc2	296.233	111.262	0.375591	1.9768e-08
ENSMUSG00000043458	Pcdhb12	29.3852	11.0373	0.375607	0.0041083
ENSMUSG00000042043	Tbca	4014.27	1508.17	0.375702	7.71297e-27
ENSMUSG00000034235	Usp54	2232.71	839.26	0.375893	1.07835e-22
ENSMUSG00000060814	Gm4980	161.956	60.9166	0.376131	7.17155e-06
ENSMUSG00000025213	Kazald1	762.481	286.872	0.376235	1.05023e-06
ENSMUSG00000031584	Gsr	5133.09	1932.12	0.376404	1.35574e-27
ENSMUSG00000028243	Ubxn2b	1418.04	533.797	0.376433	1.6796e-18
ENSMUSG00000022636	Alcam	25787.9	9708.26	0.376466	2.33169e-25
ENSMUSG00000020956	6530401N04Rik	437.776	164.851	0.376564	1.13013e-09
ENSMUSG00000050357	Rltpr	1484.48	559.378	0.376817	5.29167e-09
ENSMUSG00000023921	Mut	2498.18	941.478	0.376866	2.20683e-22
ENSMUSG00000026344	Lypd1	1720.53	648.619	0.376989	2.49608e-21
ENSMUSG00000050199	Lgr4	6366.67	2400.34	0.377017	3.24054e-24
ENSMUSG00000021950	Anxa8	4025.86	1518.43	0.377169	1.90336e-25
ENSMUSG00000049823	Zbtb12	1144.15	431.648	0.377264	6.72128e-16
ENSMUSG00000027823	Gmps	4724.19	1782.48	0.377309	1.96306e-27
ENSMUSG00000034639	Setmar	176.77	66.7221	0.377451	1.38016e-06
ENSMUSG00000043648	Pld6	21.611	8.15868	0.377524	0.0833374
ENSMUSG00000087651	1500009L16Rik	465.812	176.103	0.378056	3.54666e-11
ENSMUSG00000050107	Gsg2	210.501	79.6032	0.378161	3.22327e-07
ENSMUSG00000036197	Gxylt1	4542.46	1718.21	0.378257	7.31311e-27
ENSMUSG00000052917	Senp7	2245.27	849.466	0.378335	1.24034e-14
ENSMUSG00000026223	Itm2c	15997.7	6054.8	0.378479	7.45187e-27
ENSMUSG00000078429	Ctdsp2	7349.78	2782.03	0.378518	3.1279e-28
ENSMUSG00000043421	Hilpda	479.309	181.458	0.378583	9.16871e-05
ENSMUSG00000067787	Blcap	3101.91	1174.63	0.378679	3.93685e-24
ENSMUSG00000038290	Smg6	3438.56	1302.95	0.378922	1.84195e-25
ENSMUSG00000040297	AI848100	5882.29	2231.72	0.379397	2.50216e-20
ENSMUSG00000090083	Rnf8	1998.68	758.37	0.379435	8.20247e-21
ENSMUSG00000021846	Peli2	568.7	215.792	0.379447	3.6729e-11
ENSMUSG00000045968	5830403L16Rik	411.263	156.29	0.380025	3.68903e-07
ENSMUSG00000052889	Prkcb	620.975	236.022	0.380083	4.77074e-06
ENSMUSG00000070354	Evi2b	146.408	55.6473	0.380084	6.61318e-06
ENSMUSG00000034071	Zfp551	174.065	66.1859	0.380236	1.76481e-06
ENSMUSG00000047879	Usp14	5019.88	1909.47	0.380382	3.88464e-27
ENSMUSG00000021807	2700060E02Rik	11376.9	4329.08	0.380514	1.09796e-27
ENSMUSG00000017776	Crk	7077.92	2693.33	0.380525	6.38903e-28
ENSMUSG00000063894	Zfp192	2282.6	868.994	0.380703	4.33495e-23
ENSMUSG00000023959	Clic5	16938.3	6451.57	0.380887	2.75933e-27
ENSMUSG00000044816	D630023F18Rik	389.058	148.207	0.380937	1.76961e-09
ENSMUSG00000030346	Rad51ap1	328.204	125.049	0.38101	5.14029e-09
ENSMUSG00000042684	Npl	3335.43	1271.05	0.381076	5.2239e-22
ENSMUSG00000031988	Vps26b	4844.73	1846.96	0.381231	9.78853e-27
ENSMUSG00000052102	Gnpda1	1570.35	598.826	0.381333	1.49028e-17
ENSMUSG00000015749	Anp32e	8249.87	3149.96	0.381819	8.06151e-28
ENSMUSG00000026104	Stat1	29245.8	11174.7	0.382097	1.22812e-21
ENSMUSG00000021969	Zdhhc20	3962.02	1514.16	0.382168	3.89865e-26
ENSMUSG00000022361	Zhx1	3941.54	1506.48	0.382206	9.08955e-26
ENSMUSG00000035232	Pdk3	2366.94	904.932	0.382322	1.14373e-22
ENSMUSG00000049744	Arhgap15	166.68	63.7307	0.382354	0.000148487
ENSMUSG00000022808	Snx4	4292.74	1641.51	0.382391	5.32221e-26
ENSMUSG00000021537	Cetn3	4844.97	1852.74	0.382405	1.22775e-26
ENSMUSG00000045273	Cenph	251.899	96.3439	0.382471	4.36675e-08
[truncated: 8,953 more rows]

## Sheet: 4
Go back to DESeq comparisons
cTEC vs Aire_ko_TEC (>2 fold, 5% FDR, DESeq analysis)
Ensembl ID	Gene Symbol	cTEC (mean counts)	Aire_ko_TEC (mean counts)	Fold Change	FDR (BH)
ENSMUSG00000001865	Cpa3	5.72265	0	0	0.0198933
ENSMUSG00000007805	Twist2	470.562	0	0	7.04347e-36
ENSMUSG00000017316	Ppy	4.86962	0	0	0.0227853
ENSMUSG00000017817	Jph2	6.74838	0	0	0.00829415
ENSMUSG00000019933	2310015B20Rik	211.591	0	0	8.48996e-14
ENSMUSG00000020562	Efcab10	4.78326	0	0	0.0223424
ENSMUSG00000020583	Matn3	2.94768	0	0	0.0944429
ENSMUSG00000020686	Gas2l2	41.921	0	0	7.29498e-15
ENSMUSG00000022225	Cma1	3.90865	0	0	0.0365977
ENSMUSG00000022227	Mcpt1	3.86547	0	0	0.0341475
ENSMUSG00000022431	Ribc2	30.6863	0	0	2.12006e-07
ENSMUSG00000025389	Mip	7.15331	0	0	0.00101123
ENSMUSG00000026919	Lcn4	2.92609	0	0	0.0975377
ENSMUSG00000027596	a	13.0055	0	0	5.29657e-05
ENSMUSG00000027966	Col11a1	3.33101	0	0	0.055663
ENSMUSG00000029660	4930588N13Rik	8.62715	0	0	0.000661807
ENSMUSG00000030092	Cntn6	19.1978	0	0	1.14318e-07
ENSMUSG00000031241	Tbx22	2.83973	0	0	0.0989361
ENSMUSG00000032310	Cyp1a2	3.3526	0	0	0.0557271
ENSMUSG00000033156	Cst10	4.89121	0	0	0.0210372
ENSMUSG00000034028	Cd226	6.76997	0	0	0.00215869
ENSMUSG00000034039	Prss29	5.87377	0	0	0.00582386
ENSMUSG00000034689	4921530L21Rik	15.7373	0	0	0.000736043
ENSMUSG00000035491	1600014K23Rik	5.74423	0	0	0.00666033
ENSMUSG00000035653	Lrfn5	7.1749	0	0	0.00156237
ENSMUSG00000040086	Tnni3k	8.17904	0	0	0.00295569
ENSMUSG00000042379	Esm1	10.6139	0	0	7.90317e-05
ENSMUSG00000044041	Krt13	5.25295	0	0	0.0110627
ENSMUSG00000044835	Ankrd45	24.3428	0	0	1.05296e-09
ENSMUSG00000045534	Kcna5	2.9045	0	0	0.0948785
ENSMUSG00000046367	4931440L10Rik	3.3526	0	0	0.0639386
ENSMUSG00000047197	Gjd3	6.2571	0	0	0.0228298
ENSMUSG00000048087	Gm4737	2.86132	0	0	0.0904942
ENSMUSG00000049691	Nkx3-2	4.31357	0	0	0.032328
ENSMUSG00000050164	Mchr1	16.8062	0	0	6.61412e-07
ENSMUSG00000050345	4930486L24Rik	6.21392	0	0	0.0040683
ENSMUSG00000051839	Gypa	5.27454	0	0	0.00962661
ENSMUSG00000052629	Gm9885	3.86547	0	0	0.0840841
ENSMUSG00000053747	Sox14	4.80485	0	0	0.0163812
ENSMUSG00000053773	Rdh8	5.76582	0	0	0.00592373
ENSMUSG00000054061	Gm9934	248.47	0	0	2.43537e-20
ENSMUSG00000054690	Emcn	11.2347	0	0	0.0334307
ENSMUSG00000054746	Abca15	24.4292	0	0	2.16234e-09
ENSMUSG00000055446	A630091E08Rik	3.37419	0	0	0.0640533
ENSMUSG00000055489	Ano5	34.487	0	0	3.28211e-13
ENSMUSG00000056821	1700028I16Rik	3.37419	0	0	0.0627849
ENSMUSG00000057729	Prtn3	2.88291	0	0	0.0988586
ENSMUSG00000061068	Mcpt4	3.43896	0	0	0.0604292
ENSMUSG00000061980	Dcpp1	3.39578	0	0	0.0587591
ENSMUSG00000062329	Cytl1	5.809	0	0	0.00720449
ENSMUSG00000066797	Zfp648	529.808	0	0	3.81997e-68
ENSMUSG00000067996	Bpifb9b	3.37419	0	0	0.0691945
ENSMUSG00000069917	Hba-a2	6.38663	0	0	0.00591576
ENSMUSG00000070368	Prok1	2.86132	0	0	0.0981148
ENSMUSG00000070388	Fbxo39	14.3282	0	0	2.37399e-05
ENSMUSG00000073785	Krtap5-5	7.70935	0	0	0.00128961
ENSMUSG00000073810	Ifnz	2.86132	0	0	0.0926594
ENSMUSG00000073940	Hbb-b2	5.83059	0	0	0.00771801
ENSMUSG00000075707	Dio3	7.23966	0	0	0.00107671
ENSMUSG00000078169	Gm16499	15.91	0	0	2.31635e-06
ENSMUSG00000078640	Gm11627	25.3902	0	0	1.86784e-09
ENSMUSG00000078752	Gm12776	4.33516	0	0	0.0216727
ENSMUSG00000079042	Trim61	14.4146	0	0	6.24726e-06
ENSMUSG00000079105	C7	4.84803	0	0	0.0136738
ENSMUSG00000080907	4930455H04Rik	9.56653	0	0	0.000269949
ENSMUSG00000084927	Gm5724	10.101	0	0	0.000156689
ENSMUSG00000089634	Nat8b	3.37419	0	0	0.0557009
ENSMUSG00000090747	Gm17495	24.8773	0	0	3.99535e-08
ENSMUSG00000090843	Gm17673	27.2905	0	0	2.19021e-09
ENSMUSG00000090897	Gm5494	8.11428	0	0	0.00169006
ENSMUSG00000091222	Gm17723	28.9155	0	0	9.61228e-09
ENSMUSG00000092251	Trav9n-1	10.1226	0	0	0.00150746
ENSMUSG00000026188	Tmem169	3703.62	3.04344	0.000821747	2.02493e-221
ENSMUSG00000045318	Adra2c	542.716	0.597093	0.00110019	3.56639e-69
ENSMUSG00000024593	Megf10	1242.7	1.79128	0.00144144	1.31072e-65
ENSMUSG00000017767	1700020C07Rik	741.206	1.21351	0.00163721	4.01978e-25
ENSMUSG00000061353	Cxcl12	43194.6	71.9237	0.00166511	0
ENSMUSG00000047746	Fbxo40	434.758	1.21351	0.00279123	3.77057e-58
ENSMUSG00000064329	Scn1a	963.309	3.02411	0.0031393	3.51899e-23
ENSMUSG00000021760	Gpx8	1234.44	4.23762	0.00343284	2.83504e-114
ENSMUSG00000012017	Scarf2	8968.11	31.4353	0.00350523	1.71486e-82
ENSMUSG00000072423	Psmb11	45444.8	160.819	0.00353877	1.19126e-51
ENSMUSG00000030562	Nox4	164.467	0.597093	0.00363049	3.2363e-18
ENSMUSG00000022122	Ednrb	3697.72	13.965	0.00377666	3.00296e-171
ENSMUSG00000034990	Otoa	468.711	1.82993	0.00390417	1.69799e-79
ENSMUSG00000056468	5730596B20Rik	151.229	0.597093	0.00394828	2.27688e-09
ENSMUSG00000063605	Ccdc102a	910.044	3.64053	0.00400039	3.79368e-88
ENSMUSG00000074743	Thbd	2026.69	9.07234	0.00447644	1.06664e-140
ENSMUSG00000053399	Adamts18	1591.51	7.24241	0.00455064	1.24266e-58
ENSMUSG00000056900	Usp13	356.477	1.79128	0.00502495	1.40044e-54
ENSMUSG00000037379	Spon2	4364.41	22.9601	0.00526075	3.2945e-66
ENSMUSG00000006179	Prss16	302291	1714.44	0.00567147	1.90572e-63
ENSMUSG00000018217	Pmp22	1497.36	8.51389	0.00568594	5.0778e-119
ENSMUSG00000073209	Klf14	104.103	0.616417	0.0059212	7.9584e-25
ENSMUSG00000021477	Ctsl	382821	2267.79	0.00592389	5.4969e-183
ENSMUSG00000048285	Frmd6	51097.6	327.936	0.00641783	1.04165e-75
ENSMUSG00000037624	Kcnk2	6538.49	42.9733	0.00657236	1.38663e-267
ENSMUSG00000020793	Galr2	1902.13	12.6742	0.00666318	6.97973e-124
ENSMUSG00000031740	Mmp2	11147.2	74.5826	0.00669072	0
ENSMUSG00000022342	Kcnv1	83.2806	0.597093	0.00716966	1.3415e-13
ENSMUSG00000050520	Cldn8	1330.8	10.2665	0.00771453	1.56136e-101
ENSMUSG00000062563	Cys1	469.035	3.64053	0.00776175	3.50276e-54
ENSMUSG00000039252	Lgi2	8349.44	65.4136	0.00783449	1.52239e-296
ENSMUSG00000030087	Klf15	2746.95	22.4596	0.00817618	1.64925e-48
ENSMUSG00000031772	Cntnap4	766.925	6.68397	0.00871528	5.68306e-74
ENSMUSG00000046275	Tusc5	1218.92	10.9023	0.0089442	2.14329e-95
ENSMUSG00000004473	Clec11a	2088.71	18.7611	0.00898214	1.72782e-110
ENSMUSG00000024211	Grm8	656.575	6.0289	0.00918235	4.93323e-68
ENSMUSG00000018593	Sparc	8869.58	82.9419	0.00935127	7.38585e-133
ENSMUSG00000051048	P4ha3	7241.41	69.7478	0.0096318	1.01466e-208
ENSMUSG00000079560	Hoxa3	1316.63	12.7902	0.00971434	1.80467e-106
ENSMUSG00000022415	Syngr1	12414.9	123.855	0.00997637	4.68676e-316
ENSMUSG00000032714	Syde1	712.376	7.31971	0.0102751	7.11123e-76
ENSMUSG00000043099	Hic1	6161.67	65.9914	0.01071	2.71068e-28
ENSMUSG00000022454	Nell2	3000.61	32.245	0.0107461	3.89409e-173
ENSMUSG00000020811	Wscd1	7393.61	80.996	0.0109549	2.29858e-42
ENSMUSG00000026574	Dpt	1150.9	12.8095	0.0111299	9.70687e-86
ENSMUSG00000039873	Neurl2	3871.58	43.7057	0.0112888	1.14704e-182
ENSMUSG00000027489	Necab3	640.093	7.31971	0.0114354	7.07276e-63
ENSMUSG00000043496	Tril	717.191	8.47525	0.0118173	3.68868e-42
ENSMUSG00000025105	Bnc1	3175.8	37.5995	0.0118394	1.96523e-176
ENSMUSG00000028373	Astn2	1791.7	21.8432	0.0121913	1.73584e-24
ENSMUSG00000030352	Tspan9	7753.39	97.6586	0.0125956	6.32146e-268
ENSMUSG00000031872	Bean1	143.568	1.8106	0.0126115	6.19692e-28
ENSMUSG00000027488	Snta1	799.786	10.2665	0.0128366	5.31892e-74
ENSMUSG00000052105	1110012J17Rik	4227.61	54.4727	0.012885	8.25854e-194
ENSMUSG00000038540	Tmc3	2692.6	35.1145	0.0130411	9.35529e-62
ENSMUSG00000041633	Kctd12b	908.199	12.1544	0.013383	6.49679e-60
ENSMUSG00000006567	Atp7b	4005.82	54.5693	0.0136225	9.16221e-184
ENSMUSG00000051226	Gm9851	7436	101.858	0.0136979	8.28092e-247
ENSMUSG00000078129	1700007I08Rik	44.6959	0.616417	0.0137913	5.54435e-12
ENSMUSG00000028020	Glrb	1472.67	20.6297	0.0140083	3.30528e-85
ENSMUSG00000001555	Fkbp10	2230.75	31.5513	0.0141438	3.33059e-127
ENSMUSG00000057880	Abat	14399.1	205.468	0.0142694	2.66685e-303
ENSMUSG00000027386	Fbln7	631.017	9.09166	0.0144079	5.93635e-62
ENSMUSG00000017314	Mpp2	1481.06	21.9398	0.0148136	2.36687e-107
ENSMUSG00000056174	Col8a2	1888.96	29.0856	0.0153977	5.08936e-111
ENSMUSG00000020695	Mrc2	778.483	12.0578	0.0154889	2.68089e-42
ENSMUSG00000024027	Glp1r	78.2219	1.21351	0.0155137	1.52302e-19
ENSMUSG00000022057	Adamdec1	574.288	8.99505	0.015663	1.34191e-75
ENSMUSG00000003477	Inmt	1540.61	24.8093	0.0161035	2.86773e-28
ENSMUSG00000036036	Zfp57	894.221	14.4848	0.0161983	9.70631e-77
ENSMUSG00000021448	Shc3	445.863	7.24241	0.0162436	8.54466e-51
ENSMUSG00000042417	Ccno	777.999	12.7515	0.0163901	1.47563e-15
ENSMUSG00000026692	Fmo4	106.916	1.79128	0.016754	4.99151e-07
ENSMUSG00000007480	Mc5r	73.1633	1.23283	0.0168504	1.20192e-16
ENSMUSG00000029844	Hoxa1	180.252	3.04344	0.0168843	8.96323e-30
ENSMUSG00000027574	Nkain4	2034.34	34.73	0.0170718	4.39673e-124
ENSMUSG00000053647	Gpr30	1662.43	28.4885	0.0171367	1.41134e-63
ENSMUSG00000014704	Hoxa2	778.203	13.3486	0.0171531	2.1522e-72
ENSMUSG00000017754	Pltp	76860.2	1324.92	0.0172381	1.41089e-116
ENSMUSG00000027748	Trpc4	103.866	1.82993	0.0176182	6.64122e-14
ENSMUSG00000034685	Fam171a2	551.845	9.7274	0.0176271	9.23377e-26
ENSMUSG00000041734	Kirrel	3904.96	68.9768	0.0176639	9.53285e-33
ENSMUSG00000039982	Dtx4	5514.71	97.6006	0.0176982	2.88217e-219
ENSMUSG00000020473	Aebp1	4086.49	74.14	0.0181427	6.58422e-119
ENSMUSG00000022441	Efcab6	32.7378	0.597093	0.0182387	1.1517e-10
ENSMUSG00000051041	Olfml1	2652.4	48.6177	0.0183297	1.64952e-83
ENSMUSG00000044921	Rassf9	697.244	12.7902	0.0183439	1.17879e-52
ENSMUSG00000042807	Hecw2	585.415	10.8636	0.0185571	9.07288e-67
ENSMUSG00000028167	Bdh2	129.072	2.4077	0.0186539	3.48848e-28
ENSMUSG00000042351	Grap2	3912.81	74.2734	0.0189821	2.80281e-165
ENSMUSG00000050623	1700019N12Rik	478.321	9.11099	0.0190479	6.45287e-50
ENSMUSG00000015652	Steap1	31.1992	0.597093	0.0191381	1.61773e-10
ENSMUSG00000056494	Cngb3	60.1362	1.19419	0.019858	3.27657e-16
ENSMUSG00000032440	Tgfbr2	8676.48	172.896	0.019927	2.56839e-247
ENSMUSG00000004631	Sgce	776.464	15.8529	0.0204168	5.88581e-67
ENSMUSG00000022206	Npr3	355.705	7.28106	0.0204694	4.7136e-43
ENSMUSG00000025038	Efhc2	266.291	5.45113	0.0204705	3.06131e-37
ENSMUSG00000038576	Susd4	3051.78	62.4861	0.0204753	3.84441e-154
ENSMUSG00000033590	Myo5c	2097.87	43.4738	0.0207228	4.86438e-131
ENSMUSG00000044349	Snhg11	16386.9	340.648	0.0207879	2.96733e-41
ENSMUSG00000079355	Ccrl1	8875.67	184.838	0.0208252	5.48677e-48
ENSMUSG00000024600	Slc27a6	316.737	6.68397	0.0211026	7.6197e-44
ENSMUSG00000050967	Creg2	832.087	17.6056	0.0211583	3.41235e-65
ENSMUSG00000045281	Gpr20	254.339	5.43181	0.0213566	3.57608e-39
ENSMUSG00000032269	Htr3a	55.353	1.19419	0.021574	1.62013e-11
ENSMUSG00000049409	Prokr1	279.939	6.04823	0.0216055	5.02113e-36
ENSMUSG00000078235	Fam43b	168.942	3.65985	0.0216634	5.15217e-28
ENSMUSG00000059049	Frem1	334.472	7.26174	0.021711	8.99505e-42
ENSMUSG00000049107	Ntf3	28.2731	0.616417	0.0218023	1.90257e-07
ENSMUSG00000043461	1110032A04Rik	1280.46	28.4499	0.0222185	5.19176e-63
ENSMUSG00000021483	Cdk20	4926.51	111.142	0.0225601	9.36219e-50
ENSMUSG00000090084	Srpx	52.6591	1.19419	0.0226777	8.58717e-15
ENSMUSG00000053897	Slc39a8	2861.99	65.9141	0.0230309	2.3802e-143
ENSMUSG00000020424	Gatsl3	9215.68	213.5	0.0231671	3.21913e-140
ENSMUSG00000018986	Slfn3	50.7803	1.19419	0.0235167	2.36411e-13
ENSMUSG00000023411	Nfatc4	205.415	4.83472	0.0235363	3.00445e-31
ENSMUSG00000039167	Eltd1	25.3091	0.597093	0.0235921	0.00835771
ENSMUSG00000031323	Dmrtc1a	75.3606	1.79128	0.0237694	1.08113e-18
ENSMUSG00000061576	Dpp6	4951.04	118.789	0.0239927	1.6936e-34
ENSMUSG00000030088	Aldh1l1	12781.4	322.119	0.0252021	2.4454e-96
ENSMUSG00000014361	Mertk	215.079	5.47046	0.0254346	1.90543e-27
ENSMUSG00000048572	E030010A14Rik	1429.15	36.386	0.0254598	8.63931e-66
ENSMUSG00000030554	Synm	19261.9	494.283	0.0256612	7.94668e-267
ENSMUSG00000016386	Mpped2	1368.49	35.1338	0.0256734	2.71317e-96
ENSMUSG00000032649	Glt25d2	660.284	16.9698	0.0257008	3.6549e-29
ENSMUSG00000032372	Plscr2	609.995	15.6983	0.0257352	8.36269e-55
ENSMUSG00000039405	Prss23	141.5	3.65985	0.0258647	5.34396e-22
ENSMUSG00000054134	Umodl1	1723.27	44.8805	0.0260438	7.55658e-105
ENSMUSG00000014329	Bicc1	2187.54	57.1896	0.0261433	6.62342e-114
ENSMUSG00000030701	Plekhb1	6251.09	164.17	0.0262626	2.80549e-43
ENSMUSG00000069171	Nr2f1	1215.24	32.0517	0.0263747	1.59295e-77
ENSMUSG00000048355	Arxes1	157.065	4.19898	0.0267341	2.69131e-27
ENSMUSG00000022687	Boc	7950.86	213.442	0.0268452	1.32513e-17
ENSMUSG00000024909	Efemp2	1983.83	53.4717	0.0269539	3.37284e-27
ENSMUSG00000057967	Fgf18	22.0591	0.597093	0.0270678	1.15363e-07
ENSMUSG00000062488	I830012O16Rik	534.737	14.5235	0.02716	9.0357e-24
ENSMUSG00000031595	Pdgfrl	66.6039	1.8106	0.0271846	2.25368e-17
ENSMUSG00000029838	Ptn	1445.83	39.4487	0.0272844	2.02135e-65
ENSMUSG00000048794	Ccdc37	244.508	6.68397	0.0273364	1.48557e-25
ENSMUSG00000033191	Tie1	44.3826	1.21351	0.027342	3.05611e-06
ENSMUSG00000039959	Hip1	1082.6	29.644	0.0273822	1.07478e-35
ENSMUSG00000056031	9330154J02Rik	65.1949	1.79128	0.0274758	5.87247e-15
ENSMUSG00000005357	Slc1a6	21.5247	0.597093	0.0277399	0.000339725
ENSMUSG00000046402	Rbp1	4035.57	113.626	0.028156	1.21916e-76
ENSMUSG00000068079	Tcf15	21.7406	0.616417	0.0283533	3.40841e-07
ENSMUSG00000058145	Adamts17	1659.18	47.2496	0.0284777	1.31126e-21
ENSMUSG00000030849	Fgfr2	12462.9	359.178	0.0288197	6.63916e-68
ENSMUSG00000028523	Tctex1d1	62.7816	1.8106	0.0288397	2.38541e-14
ENSMUSG00000037034	Pax1	43654	1274.3	0.029191	7.60203e-247
ENSMUSG00000024578	Il17b	63.1918	1.84925	0.0292641	8.08616e-15
ENSMUSG00000000942	Hoxa4	103.591	3.04344	0.0293795	2.97332e-20
ENSMUSG00000028024	Enpep	8129.36	239.061	0.0294072	3.16076e-218
ENSMUSG00000040289	Hey1	7717.06	227.408	0.0294682	2.14477e-213
ENSMUSG00000030217	Art4	406.388	12.0578	0.0296707	2.19394e-24
ENSMUSG00000027955	Fam198b	688.622	20.649	0.029986	5.73425e-59
ENSMUSG00000031563	Wwc2	2716.89	81.7284	0.0300816	1.13103e-134
ENSMUSG00000052713	Zfp608	3834.08	115.784	0.0301987	3.10136e-22
ENSMUSG00000020646	Mboat2	1081.29	32.7261	0.0302658	6.41533e-74
ENSMUSG00000038738	Shank1	1603.12	49.1761	0.0306754	6.07995e-34
ENSMUSG00000049115	Agtr1a	79.6742	2.44634	0.0307043	2.77161e-17
ENSMUSG00000029026	Trp73	276.916	8.53322	0.0308152	1.20786e-30
ENSMUSG00000070858	Gm1673	546.5	16.9312	0.0309811	3.11975e-07
ENSMUSG00000054034	Tceal5	58.684	1.82993	0.0311827	1.01871e-13
ENSMUSG00000052273	Dnahc3	211.046	6.58735	0.0312128	9.35972e-31
ENSMUSG00000032766	Gng11	173.299	5.45113	0.0314552	4.6881e-28
ENSMUSG00000020884	Asgr1	174.017	5.48978	0.0315474	1.90566e-27
ENSMUSG00000074896	Ifit3	1663.01	53.2785	0.0320373	2.93786e-20
ENSMUSG00000016494	Cd34	1391.77	44.726	0.032136	2.24448e-103
ENSMUSG00000008575	Nfib	16038.5	517.089	0.0322405	5.68338e-112
ENSMUSG00000029769	Ccdc136	2617.48	84.4066	0.0322472	2.22363e-117
ENSMUSG00000041624	Gucy1a2	2635.49	85.0984	0.0322894	1.26224e-32
ENSMUSG00000066090	Insl5	19.0251	0.616417	0.0324002	0.00154612
ENSMUSG00000022178	Jub	6379.07	207.3	0.0324968	3.39994e-107
ENSMUSG00000028037	Ifi44	4344.64	141.749	0.0326261	5.50116e-25
ENSMUSG00000053441	Adamts19	836.164	27.7561	0.0331946	4.13027e-16
ENSMUSG00000068874	Selenbp1	637.048	21.1688	0.0332295	6.12582e-54
ENSMUSG00000040209	Zfp704	4623.49	154.038	0.0333165	4.27997e-89
ENSMUSG00000021763	BC067074	2981.3	100.605	0.0337455	7.85814e-58
ENSMUSG00000042943	4922501L14Rik	681.431	22.9987	0.0337506	1.61182e-54
ENSMUSG00000034522	Zfp395	5363.9	181.352	0.0338097	8.59469e-177
ENSMUSG00000024299	Adamts10	3549.4	120.041	0.03382	3.04442e-137
ENSMUSG00000030510	Lass3	2378.87	80.7467	0.0339433	1.88235e-66
ENSMUSG00000014725	Adam28	1853.4	62.9673	0.0339739	1.31282e-19
ENSMUSG00000041797	Abca9	70.858	2.4077	0.0339792	6.90205e-14
ENSMUSG00000001281	Itgb7	1906.84	65.2977	0.0342439	9.85391e-93
ENSMUSG00000020932	Gfap	424.177	14.5621	0.0343303	9.29595e-52
ENSMUSG00000022054	Nefm	6059.96	209.473	0.0345668	2.62178e-137
ENSMUSG00000022793	B4galt4	733.82	25.619	0.0349118	1.07048e-64
ENSMUSG00000064080	Fbln2	383.421	13.4066	0.0349657	1.22281e-57
ENSMUSG00000063415	Cyp26b1	1411.88	49.5993	0.0351299	1.73139e-89
ENSMUSG00000021068	Nin	17887.1	628.961	0.0351629	1.24551e-156
ENSMUSG00000027173	Depdc7	617.98	21.7852	0.0352523	5.40683e-52
ENSMUSG00000021390	Ogn	240.07	8.51389	0.0354642	6.57466e-34
ENSMUSG00000041731	Pgm5	9777.6	346.776	0.0354664	1.13967e-211
ENSMUSG00000030737	Slco2b1	4588.03	163.149	0.0355598	1.74427e-161
ENSMUSG00000027460	Angpt4	118.48	4.23762	0.0357666	1.43592e-21
ENSMUSG00000062760	1810041L15Rik	10935.3	391.674	0.0358173	2.84113e-214
ENSMUSG00000052331	Ankrd44	5859.25	210.244	0.0358825	2.4196e-179
ENSMUSG00000026090	2010300C02Rik	6830.42	247.459	0.036229	1.35519e-190
ENSMUSG00000073988	Ttpa	166.923	6.08687	0.0364652	3.58441e-15
ENSMUSG00000042428	Mgat3	12161.8	445.202	0.0366066	1.24773e-78
ENSMUSG00000034732	Pabpc5	82.962	3.04344	0.0366847	8.95975e-16
ENSMUSG00000027524	Edn3	50.2674	1.84925	0.0367882	9.78001e-08
ENSMUSG00000033149	Phldb2	2315.93	85.4269	0.0368866	7.61466e-53
ENSMUSG00000040867	Begain	473.516	17.5283	0.0370173	7.65164e-45
ENSMUSG00000044807	Zfp354c	1911.17	70.8261	0.037059	5.05632e-97
ENSMUSG00000030623	1700019G06Rik	32.6946	1.21351	0.0371165	5.38856e-09
ENSMUSG00000026748	Plxdc2	6957.77	259.649	0.0373178	1.68466e-192
ENSMUSG00000022665	Ccdc80	6515.66	243.529	0.0373759	1.02763e-77
ENSMUSG00000047692	4930533K18Rik	178.033	6.68397	0.0375433	2.97139e-25
ENSMUSG00000046908	Ltb4r1	338.315	12.7322	0.0376341	2.64402e-12
ENSMUSG00000046169	Adamts6	643.144	24.2702	0.0377368	4.1909e-12
ENSMUSG00000015653	Steap2	443.726	16.9312	0.0381568	4.94241e-47
ENSMUSG00000067276	Capn6	223.523	8.53322	0.038176	5.65709e-38
ENSMUSG00000055538	Zcchc24	1039.1	39.8719	0.0383718	2.60306e-26
ENSMUSG00000027568	Ntsr1	15.3323	0.597093	0.0389434	5.12513e-05
ENSMUSG00000000753	Serpinf1	4614.45	181.681	0.0393721	1.49083e-106
ENSMUSG00000029669	Tspan12	1229.97	48.5597	0.0394805	1.54875e-84
ENSMUSG00000019539	Rcn3	2352.22	93.2084	0.0396257	4.4123e-118
ENSMUSG00000035357	Pdzrn3	1626.56	64.6812	0.0397657	9.94633e-47
ENSMUSG00000078161	BC007180	2276.82	90.6075	0.0397957	3.22461e-67
ENSMUSG00000033377	Palmd	352.487	14.0423	0.0398378	8.00668e-33
ENSMUSG00000034910	Pygo1	2219.07	88.6249	0.0399378	2.75011e-115
ENSMUSG00000043259	Fam13c	562.13	22.4789	0.0399888	6.10718e-22
ENSMUSG00000074060	Fbxw15	15.3539	0.616417	0.0401471	6.5229e-05
ENSMUSG00000075324	Fign	257.092	10.3438	0.0402339	2.53129e-30
ENSMUSG00000060487	Samd5	778.052	31.4546	0.0404274	7.25544e-58
ENSMUSG00000038152	5033430I15Rik	179.766	7.30038	0.0406104	1.91611e-26
ENSMUSG00000033192	Lpcat2	3977.36	161.861	0.0406955	1.09913e-47
ENSMUSG00000027435	Cd93	133.396	5.45113	0.0408642	0.000185797
ENSMUSG00000067818	Myl9	690.295	28.3339	0.0410461	5.43867e-62
ENSMUSG00000040649	Rimklb	2062.37	85.0037	0.0412165	1.46677e-14
ENSMUSG00000074415	2610203C20Rik	1366.14	56.4379	0.041312	0.0026485
ENSMUSG00000030775	Trat1	378.266	15.737	0.041603	1.49957e-41
ENSMUSG00000069855	Slc47a2	292.389	12.1737	0.0416355	2.16929e-36
ENSMUSG00000033355	Rtp4	1669.98	71.0386	0.0425385	3.01013e-52
ENSMUSG00000040183	Ankrd6	4198.21	178.674	0.0425595	5.34101e-86
ENSMUSG00000031099	Smarca1	897.401	38.1966	0.0425636	2.80736e-69
ENSMUSG00000026572	Tbx19	14.4577	0.616417	0.0426358	5.32543e-05
ENSMUSG00000029913	Prdm5	367.723	15.7563	0.0428483	2.50014e-41
ENSMUSG00000046561	Arsj	42.2179	1.8106	0.0428871	2.89728e-11
ENSMUSG00000030247	Kcnj8	14.2039	0.616417	0.0433976	0.0202687
ENSMUSG00000030513	Pcsk6	2440.72	106.114	0.0434767	2.67471e-108
ENSMUSG00000067586	S1pr3	15718.5	685.266	0.0435962	5.98912e-90
ENSMUSG00000056492	Gpr116	653.222	28.6044	0.0437897	7.57611e-41
ENSMUSG00000000305	Cdh4	26690.1	1172.33	0.0439238	1.83e-215
ENSMUSG00000028179	Cth	4660.79	205.18	0.0440226	2.6454e-148
ENSMUSG00000020427	Igfbp3	2449.87	107.906	0.0440454	1.10865e-111
ENSMUSG00000020261	Slc36a1	27885	1233.15	0.0442229	6.62765e-214
ENSMUSG00000028801	4930555I21Rik	563.393	24.9253	0.0442413	6.62239e-32
ENSMUSG00000033720	Sfxn5	1790.06	79.3013	0.044301	4.91703e-88
ENSMUSG00000054263	Lifr	22282.1	988.085	0.0443444	1.15148e-16
ENSMUSG00000039133	9330171B17Rik	27.2905	1.21351	0.0444664	4.56541e-08
ENSMUSG00000028487	Bnc2	523.61	23.5185	0.0449161	1.38575e-44
ENSMUSG00000049532	Sall2	500.395	22.5369	0.0450382	9.1538e-27
ENSMUSG00000047821	Trim16	762.271	34.5754	0.0453584	8.41293e-56
ENSMUSG00000040569	Slc26a7	400.757	18.2606	0.0455653	6.97535e-43
ENSMUSG00000022416	Cacna1i	423.777	19.3195	0.0455889	5.38749e-33
ENSMUSG00000037653	Kctd8	92.6365	4.23762	0.0457446	3.38628e-17
ENSMUSG00000055775	Myh8	12.9623	0.597093	0.0460638	3.39582e-05
ENSMUSG00000028669	1110049F12Rik	23634.7	1093.89	0.0462832	2.59889e-45
ENSMUSG00000039883	Lrrc17	2309.03	107.137	0.046399	7.38732e-127
ENSMUSG00000059213	Ddn	52.2542	2.42702	0.0464465	3.54072e-13
ENSMUSG00000061311	Rag1	7921.98	368.285	0.046489	9.64381e-16
ENSMUSG00000024143	Rhoq	4625.2	215.427	0.0465768	1.94579e-150
ENSMUSG00000093430	Isl2	25.9678	1.21351	0.0467314	5.32811e-07
ENSMUSG00000060268	Gm1661	129.942	6.08687	0.0468431	2.51947e-21
ENSMUSG00000031937	2200002K05Rik	284.831	13.3873	0.0470008	6.0235e-32
ENSMUSG00000021198	Unc79	4888.54	231.164	0.0472869	1.19934e-121
ENSMUSG00000045934	Mtmr11	3171.2	150.207	0.0473659	1.86694e-59
ENSMUSG00000053044	Cd8b1	1243.26	59.0562	0.047501	3.4037e-07
ENSMUSG00000074505	Fat3	2641.94	126.05	0.0477114	1.18733e-15
ENSMUSG00000048728	Zfp454	63.2945	3.02411	0.0477784	1.15465e-10
ENSMUSG00000021898	Asb14	12.876	0.616417	0.0478735	0.000638647
ENSMUSG00000045954	Sdpr	50.278	2.4077	0.0478877	0.00130985
ENSMUSG00000036225	Kctd1	5526.54	266.702	0.0482583	7.71e-164
ENSMUSG00000046152	Fut10	452.38	21.8818	0.0483705	1.31003e-44
ENSMUSG00000067220	Cnga1	12.6437	0.616417	0.0487527	0.000496295
ENSMUSG00000020774	Aspa	61.4589	3.00479	0.048891	7.24627e-13
ENSMUSG00000036880	Acaa2	3301.62	162.205	0.0491287	9.75248e-129
[truncated: 8,596 more rows]

## Sheet: 5
Go back to DESeq comparisons
[truncated: 6,863 more rows]

[truncated: 16 more sheets: 6, 7, 8, 9, 10, 11, 12, 13, 14, 15, 16, 17, 18, 19, 20, 21]
