# Supplementary material for: Population and single-cell genomics reveal the Aire dependency, relief from Polycomb silencing, and distribution of self-antigen expression in thymic epithelia
Source: Genome Res. 2014 Dec;24(12):1918–31. doi: 10.1101/gr.171645.113 (PMC4248310; doi:10.1101/gr.171645.113)
Supplement: Supplemental Material [file supp_gr.171645.113_Supplemental_Table4.xlsx]

## Sheet: pathways
Supplementary Table 4. Kegg pathways enriched in genes differentially expressed between three fundamental TEC types (cTEC, immature mTEC and mature mTEC).
KEGG ID	KEGG pathway	cTEC vs Aire negative mature TEC			cTEC vs immature TEC			immature TEC vs Aire negative mature TEC
		No. obs.	Fold	FDR (BH)	No. obs.	Fold	FDR (BH)	No. obs.	Fold	FDR (BH)	No. comparisons that the pathway is enriched in (5%FDR)
mmu00280	Valine, leucine and isoleucine degradation - Mus musculus (mouse)	22	2.69	6.1e-05	21	3.89	1e-06	12	1.94	0.0461	3
mmu05330	Allograft rejection - Mus musculus (mouse)	24	2.94	5e-06	13	2.41	0.018	18	2.92	0.000172	3
mmu04612	Antigen processing and presentation - Mus musculus (mouse)	35	2.84	0	23	2.82	0.000125	23	2.47	0.000233	3
mmu04666	Fc gamma R-mediated phagocytosis - Mus musculus (mouse)	31	2.13	0.000179	23	2.39	0.00161	28	2.54	2.5e-05	3
mmu05332	Graft-versus-host disease - Mus musculus (mouse)	21	2.47	0.0003	12	2.14	0.0533	14	2.18	0.0134	3
mmu04662	B cell receptor signaling pathway - Mus musculus (mouse)	25	2.03	0.00153	18	2.21	0.0104	23	2.47	0.000233	3
mmu04940	Type I diabetes mellitus - Mus musculus (mouse)	22	2.37	0.000384	13	2.12	0.0465	15	2.14	0.0124	3
mmu04514	Cell adhesion molecules (CAMs) - Mus musculus (mouse)	55	2.2	0	39	2.36	1.1e-05	38	2.01	0.000171	3
mmu04670	Leukocyte transendothelial migration - Mus musculus (mouse)	39	2.03	7.5e-05	27	2.13	0.00276	34	2.34	2e-05	3
mmu04664	Fc epsilon RI signaling pathway - Mus musculus (mouse)	25	2.23	0.000384	15	2.03	0.0413	19	2.24	0.00309	3
mmu00260	Glycine, serine and threonine metabolism - Mus musculus (mouse)	12	1.92	0.0486	11	2.67	0.018	9	1.91	0.0867	3
mmu00380	Tryptophan metabolism - Mus musculus (mouse)	13	1.89	0.045	10	2.2	0.0711	12	2.31	0.0149	3
mmu05416	Viral myocarditis - Mus musculus (mouse)	31	2.22	7.5e-05	18	1.96	0.0296	22	2.09	0.00322	3
mmu04070	Phosphatidylinositol signaling system - Mus musculus (mouse)	23	1.79	0.0115	20	2.36	0.00385	20	2.07	0.00543	3
mmu05320	Autoimmune thyroid disease - Mus musculus (mouse)	23	2.17	0.000949	13	1.86	0.0897	17	2.13	0.00793	3
mmu04912	GnRH signaling pathway - Mus musculus (mouse)	28	1.99	0.00109	16	1.72	0.0928	25	2.35	0.000261	3
mmu05133	Pertussis - Mus musculus (mouse)	23	1.99	0.00298	15	1.97	0.05	18	2.07	0.00833	3
mmu04142	Lysosome - Mus musculus (mouse)	36	1.81	0.0011	26	1.98	0.00682	29	1.93	0.00223	3
mmu04660	T cell receptor signaling pathway - Mus musculus (mouse)	34	1.93	0.000533	22	1.89	0.0203	25	1.88	0.00595	3
mmu04971	Gastric acid secretion - Mus musculus (mouse)	18	1.54	0.0876	18	2.33	0.00682	16	1.81	0.0379	3
mmu04370	VEGF signaling pathway - Mus musculus (mouse)	18	1.65	0.0535	13	1.81	0.0998	18	2.19	0.00496	3
mmu04970	Salivary secretion - Mus musculus (mouse)	19	1.56	0.0735	16	1.99	0.0391	15	1.63	0.083	3
mmu05169	Epstein-Barr virus infection - Mus musculus (mouse)	63	1.86	6e-06	36	1.61	0.0207	42	1.64	0.00384	3
mmu04810	Regulation of actin cytoskeleton - Mus musculus (mouse)	60	1.73	7.7e-05	39	1.71	0.00759	43	1.65	0.00356	3
mmu05310	Asthma - Mus musculus (mouse)	14	3.8	2.7e-05	-	-	-	16	5.75	0	2
mmu04672	Intestinal immune network for IgA production - Mus musculus (mouse)	20	3.04	2.1e-05	-	-	-	21	4.23	0	2
mmu03050	Proteasome - Mus musculus (mouse)	17	2.41	0.00151	21	4.51	0	-	-	-	2
mmu05140	Leishmaniasis - Mus musculus (mouse)	28	2.73	4e-06	-	-	-	27	3.49	0	2
mmu05145	Toxoplasmosis - Mus musculus (mouse)	43	2.4	0	-	-	-	44	3.25	0	2
mmu05323	Rheumatoid arthritis - Mus musculus (mouse)	29	2.15	0.00024	-	-	-	32	3.15	0	2
mmu00603	Glycosphingolipid biosynthesis - globo series - Mus musculus (mouse)	6	2.5	0.0625	-	-	-	5	2.75	0.0676	2
mmu00640	Propanoate metabolism - Mus musculus (mouse)	10	2.08	0.0466	10	3.15	0.00887	-	-	-	2
mmu05340	Primary immunodeficiency - Mus musculus (mouse)	13	2.32	0.00872	10	2.7	0.0215	-	-	-	2
mmu05150	Staphylococcus aureus infection - Mus musculus (mouse)	16	2	0.0147	-	-	-	17	2.81	0.000391	2
mmu04064	NF-kappa B signaling pathway - Mus musculus (mouse)	37	2.29	8e-06	-	-	-	30	2.45	2.5e-05	2
mmu04115	p53 signaling pathway - Mus musculus (mouse)	26	2.35	0.000121	-	-	-	18	2.16	0.0055	2
mmu05142	Chagas disease (American trypanosomiasis) - Mus musculus (mouse)	35	2.12	7.5e-05	-	-	-	29	2.33	9.9e-05	2
mmu05222	Small cell lung cancer - Mus musculus (mouse)	28	2.03	0.000754	-	-	-	25	2.4	0.000196	2
mmu00512	Mucin type O-Glycan biosynthesis - Mus musculus (mouse)	9	2.01	0.0704	-	-	-	8	2.36	0.0432	2
mmu04978	Mineral absorption - Mus musculus (mouse)	15	2.03	0.0151	-	-	-	13	2.34	0.0104	2
mmu00071	Fatty acid metabolism - Mus musculus (mouse)	15	2.03	0.0151	11	2.26	0.05	-	-	-	2
mmu05164	Influenza A - Mus musculus (mouse)	47	1.71	0.000622	-	-	-	52	2.51	0	2
mmu00340	Histidine metabolism - Mus musculus (mouse)	9	1.94	0.0805	-	-	-	8	2.28	0.0512	2
mmu04622	RIG-I-like receptor signaling pathway - Mus musculus (mouse)	21	1.9	0.00872	-	-	-	19	2.28	0.00267	2
mmu04512	ECM-receptor interaction - Mus musculus (mouse)	-	-	-	20	2.17	0.008	21	1.99	0.0063	2
mmu00520	Amino sugar and nucleotide sugar metabolism - Mus musculus (mouse)	16	2.04	0.0121	11	2.12	0.0686	-	-	-	2
mmu05146	Amoebiasis - Mus musculus (mouse)	31	1.64	0.0115	-	-	-	36	2.52	2e-06	2
mmu04380	Osteoclast differentiation - Mus musculus (mouse)	38	1.87	0.000464	-	-	-	35	2.28	2.5e-05	2
mmu04621	NOD-like receptor signaling pathway - Mus musculus (mouse)	19	2.01	0.00714	-	-	-	15	2.1	0.0139	2
mmu05020	Prion diseases - Mus musculus (mouse)	11	1.96	0.0511	-	-	-	9	2.12	0.0556	2
mmu00330	Arginine and proline metabolism - Mus musculus (mouse)	18	2.01	0.00875	-	-	-	14	2.07	0.0204	2
mmu04066	HIF-1 signaling pathway - Mus musculus (mouse)	37	1.99	0.000164	-	-	-	28	1.99	0.00166	2
mmu00562	Inositol phosphate metabolism - Mus musculus (mouse)	16	1.64	0.0735	15	2.33	0.0151	-	-	-	2
mmu05152	Tuberculosis - Mus musculus (mouse)	52	1.84	6.1e-05	-	-	-	45	2.11	1.2e-05	2
mmu05162	Measles - Mus musculus (mouse)	34	1.54	0.0201	-	-	-	40	2.4	2e-06	2
mmu04930	Type II diabetes mellitus - Mus musculus (mouse)	15	1.87	0.0332	-	-	-	12	1.98	0.0422	2
mmu04722	Neurotrophin signaling pathway - Mus musculus (mouse)	40	2.06	4.5e-05	-	-	-	26	1.78	0.0101	2
mmu05214	Glioma - Mus musculus (mouse)	21	2.02	0.00415	-	-	-	14	1.78	0.057	2
mmu04620	Toll-like receptor signaling pathway - Mus musculus (mouse)	28	1.75	0.00741	-	-	-	24	1.98	0.00384	2
mmu04630	Jak-STAT signaling pathway - Mus musculus (mouse)	45	1.8	0.000314	-	-	-	36	1.91	0.000642	2
mmu04210	Apoptosis - Mus musculus (mouse)	22	1.63	0.0377	-	-	-	21	2.07	0.00446	2
mmu04062	Chemokine signaling pathway - Mus musculus (mouse)	-	-	-	32	1.54	0.0542	51	2.14	2e-06	2
mmu05160	Hepatitis C - Mus musculus (mouse)	36	1.65	0.00556	-	-	-	33	2.01	0.000461	2
mmu05212	Pancreatic cancer - Mus musculus (mouse)	19	1.67	0.0449	-	-	-	16	1.86	0.0312	2
mmu04510	Focal adhesion - Mus musculus (mouse)	55	1.67	0.000384	-	-	-	46	1.85	0.000196	2
mmu05166	HTLV-I infection - Mus musculus (mouse)	84	1.85	0	-	-	-	57	1.66	0.000461	2
mmu04972	Pancreatic secretion - Mus musculus (mouse)	-	-	-	19	1.74	0.0651	22	1.77	0.019	2
mmu05200	Pathways in cancer - Mus musculus (mouse)	89	1.71	3e-06	-	-	-	70	1.78	1.2e-05	2
mmu04713	Circadian entrainment - Mus musculus (mouse)	24	1.54	0.0504	-	-	-	22	1.87	0.0104	2
mmu04012	ErbB signaling pathway - Mus musculus (mouse)	25	1.79	0.00856	-	-	-	17	1.61	0.0726	2
mmu05031	Amphetamine addiction - Mus musculus (mouse)	19	1.72	0.0355	-	-	-	14	1.68	0.0803	2
mmu05168	Herpes simplex infection - Mus musculus (mouse)	51	1.56	0.00286	-	-	-	45	1.82	0.000325	2
mmu04920	Adipocytokine signaling pathway - Mus musculus (mouse)	19	1.69	0.04	-	-	-	14	1.65	0.0855	2
mmu04720	Long-term potentiation - Mus musculus (mouse)	18	1.63	0.0606	-	-	-	14	1.68	0.0803	2
mmu04650	Natural killer cell mediated cytotoxicity - Mus musculus (mouse)	-	-	-	27	1.73	0.0253	28	1.56	0.0328	2
mmu05161	Hepatitis B - Mus musculus (mouse)	37	1.55	0.0134	-	-	-	31	1.72	0.00738	2
mmu04020	Calcium signaling pathway - Mus musculus (mouse)	-	-	-	29	1.5	0.0808	38	1.72	0.00322	2
mmu04010	MAPK signaling pathway - Mus musculus (mouse)	65	1.58	0.000534	-	-	-	50	1.61	0.00267	2
mmu00460	Cyanoamino acid metabolism - Mus musculus (mouse)	-	-	-	3	4.73	0.0881	-	-	-	1
mmu00750	Vitamin B6 metabolism - Mus musculus (mouse)	-	-	-	4	3.78	0.0772	-	-	-	1
mmu05143	African trypanosomiasis - Mus musculus (mouse)	-	-	-	-	-	-	12	2.92	0.00267	1
mmu00360	Phenylalanine metabolism - Mus musculus (mouse)	-	-	-	-	-	-	7	2.63	0.0379	1
mmu00620	Pyruvate metabolism - Mus musculus (mouse)	-	-	-	-	-	-	13	2.56	0.00516	1
mmu00052	Galactose metabolism - Mus musculus (mouse)	-	-	-	8	2.44	0.0716	-	-	-	1
mmu00410	beta-Alanine metabolism - Mus musculus (mouse)	-	-	-	8	2.44	0.0716	-	-	-	1
mmu00480	Glutathione metabolism - Mus musculus (mouse)	-	-	-	13	2.41	0.018	-	-	-	1
mmu00900	Terpenoid backbone biosynthesis - Mus musculus (mouse)	-	-	-	-	-	-	6	2.36	0.0801	1
mmu04320	Dorso-ventral axis formation - Mus musculus (mouse)	8	2.27	0.0499	-	-	-	-	-	-	1
mmu00630	Glyoxylate and dicarboxylate metabolism - Mus musculus (mouse)	-	-	-	-	-	-	7	2.22	0.0744	1
mmu00600	Sphingolipid metabolism - Mus musculus (mouse)	-	-	-	11	2.21	0.0542	-	-	-	1
mmu04964	Proximal tubule bicarbonate reclamation - Mus musculus (mouse)	7	2.18	0.0763	-	-	-	-	-	-	1
mmu00062	Fatty acid elongation - Mus musculus (mouse)	8	2.08	0.0735	-	-	-	-	-	-	1
mmu00565	Ether lipid metabolism - Mus musculus (mouse)	-	-	-	-	-	-	9	2.01	0.0712	1
mmu00510	N-Glycan biosynthesis - Mus musculus (mouse)	-	-	-	-	-	-	12	1.98	0.0422	1
mmu04060	Cytokine-cytokine receptor interaction - Mus musculus (mouse)	-	-	-	-	-	-	65	1.97	1e-06	1
mmu05144	Malaria - Mus musculus (mouse)	-	-	-	-	-	-	13	1.95	0.0379	1
mmu00010	Glycolysis / Gluconeogenesis - Mus musculus (mouse)	-	-	-	-	-	-	15	1.94	0.0283	1
mmu04961	Endocrine and other factor-regulated calcium reabsorption - Mus musculus (mouse)	-	-	-	-	-	-	13	1.92	0.0422	1
mmu05032	Morphine addiction - Mus musculus (mouse)	-	-	-	-	-	-	21	1.89	0.0113	1
mmu04623	Cytosolic DNA-sensing pathway - Mus musculus (mouse)	-	-	-	-	-	-	14	1.87	0.0422	1
mmu04724	Glutamatergic synapse - Mus musculus (mouse)	-	-	-	-	-	-	25	1.78	0.0111	1
mmu04330	Notch signaling pathway - Mus musculus (mouse)	14	1.78	0.0535	-	-	-	-	-	-	1
mmu04725	Cholinergic synapse - Mus musculus (mouse)	-	-	-	-	-	-	24	1.77	0.0134	1
mmu04910	Insulin signaling pathway - Mus musculus (mouse)	39	1.75	0.0013	-	-	-	-	-	-	1
mmu05219	Bladder cancer - Mus musculus (mouse)	12	1.74	0.0821	-	-	-	-	-	-	1
mmu04530	Tight junction - Mus musculus (mouse)	38	1.73	0.00185	-	-	-	-	-	-	1
mmu04144	Endocytosis - Mus musculus (mouse)	61	1.73	7.5e-05	-	-	-	-	-	-	1
mmu05211	Renal cell carcinoma - Mus musculus (mouse)	-	-	-	-	-	-	15	1.72	0.0608	1
mmu05134	Legionellosis - Mus musculus (mouse)	-	-	-	-	-	-	12	1.71	0.0914	1
mmu05220	Chronic myeloid leukemia - Mus musculus (mouse)	20	1.69	0.0363	-	-	-	-	-	-	1
mmu00564	Glycerophospholipid metabolism - Mus musculus (mouse)	-	-	-	-	-	-	17	1.63	0.0674	1
mmu05203	Viral carcinogenesis - Mus musculus (mouse)	59	1.61	0.000622	-	-	-	-	-	-	1
mmu04520	Adherens junction - Mus musculus (mouse)	19	1.6	0.0606	-	-	-	-	-	-	1
mmu04916	Melanogenesis - Mus musculus (mouse)	-	-	-	-	-	-	19	1.59	0.0674	1
mmu04727	GABAergic synapse - Mus musculus (mouse)	-	-	-	-	-	-	17	1.58	0.083	1
mmu05210	Colorectal cancer - Mus musculus (mouse)	16	1.56	0.0985	-	-	-	-	-	-	1
mmu04360	Axon guidance - Mus musculus (mouse)	-	-	-	-	-	-	25	1.55	0.0448	1
mmu04728	Dopaminergic synapse - Mus musculus (mouse)	-	-	-	-	-	-	24	1.53	0.0576	1
mmu04640	Hematopoietic cell lineage - Mus musculus (mouse)	21	1.52	0.0735	-	-	-	-	-	-	1

## Sheet: mmu05200
Go back to pathways
Pathways in cancer - Mus musculus (mouse)
gene_id	mgi_symbol	cTEC_log2 (FPKM)	immature_TEC_log2 (FPKM)	Aire_negative_mature_TEC_log2 (FPKM)	pubmed
ENSMUSG00000004791	Pgf	-2.489	3.962	1.207	Pgf
ENSMUSG00000020573	Pik3cg	-0.2516	4.952	0.6954	Pik3cg
ENSMUSG00000020901	Pik3r5	0.5352	5.809	2.549	Pik3r5
ENSMUSG00000032380	Dapk2	-0.1104	5.757	5.317	Dapk2
ENSMUSG00000034330	Plcg2	2.796	4.838	3.409	Plcg2
ENSMUSG00000070348	Ccnd1	0.02014	5.371	4.432	Ccnd1
ENSMUSG00000001507	Itga3	4.585	5.272	5.697	Itga3
ENSMUSG00000003873	Bax	5.366	5.443	7.159	Bax
ENSMUSG00000004040	Stat3	5.78	6.601	7.68	Stat3
ENSMUSG00000004043	Stat5a	2.345	5.553	6.576	Stat5a
ENSMUSG00000005672	Kit	0.4382	4.486	5.113	Kit
ENSMUSG00000007659	Bcl2l1	4.141	4.167	6.782	Bcl2l1
ENSMUSG00000015709	Arnt2	1.412	3.647	4.682	Arnt2
ENSMUSG00000018209	Stk4	3.672	4.052	4.924	Stk4
ENSMUSG00000020048	Hsp90b1	7.795	8.441	9.678	Hsp90b1
ENSMUSG00000020053	Igf1	-1.431	2.659	4.588	Igf1
ENSMUSG00000020826	Nos2	-1.247	2.052	7.449	Nos2
ENSMUSG00000022996	Wnt10b	-1.763	3.219	5.327	Wnt10b
ENSMUSG00000023067	Cdkn1a	3.569	5.556	6.147	Cdkn1a
ENSMUSG00000024778	Fas	2.404	4.059	6.069	Fas
ENSMUSG00000025225	Nfkb2	6.219	6.371	7.953	Nfkb2
ENSMUSG00000025499	Hras1	4.37	5.097	5.412	Hras1
ENSMUSG00000026167	Wnt10a	-2.382	3.002	4.183	Wnt10a
ENSMUSG00000026875	Traf1	-0.1931	3.642	5.739	Traf1
ENSMUSG00000026942	Traf2	4.128	4.348	5.485	Traf2
ENSMUSG00000028645	Slc2a1	3.108	3.96	4.485	Slc2a1
ENSMUSG00000030110	Ret	-1.989	2.7	3.368	Ret
ENSMUSG00000030827	Fgf21	1.631	5.217	8.82	Fgf21
ENSMUSG00000031137	Fgf13	1.648	2.121	4.172	Fgf13
ENSMUSG00000031537	Ikbkb	4.546	4.982	6.256	Ikbkb
ENSMUSG00000032000	Birc3	5.517	5.56	7.312	Birc3
ENSMUSG00000032462	Pik3cb	0.4483	2.136	3.881	Pik3cb
ENSMUSG00000032487	Ptgs2	-0.0785	3.853	8.1	Ptgs2
ENSMUSG00000033220	Rac2	2.611	4.279	6.824	Rac2
ENSMUSG00000037992	Rara	3.312	3.816	4.221	Rara
ENSMUSG00000044303	Cdkn2a	-2.156	3.274	3.991	Cdkn2a
ENSMUSG00000044674	Fzd1	1.586	2.247	4.291	Fzd1
ENSMUSG00000062312	Erbb2	1.864	3.693	4.968	Erbb2
ENSMUSG00000073802	Cdkn2b	-1.182	3.619	4.595	Cdkn2b
ENSMUSG00000000303	Cdh1	6.796	7.45	6.397	Cdh1
ENSMUSG00000015647	Lama5	3.466	3.908	2.255	Lama5
ENSMUSG00000021250	Fos	8.263	8.597	6.799	Fos
ENSMUSG00000021253	Tgfb3	3.191	4.017	1.396	Tgfb3
ENSMUSG00000022952	Runx1	1.658	3.56	0.8388	Runx1
ENSMUSG00000024241	Sos1	3.477	3.684	2.522	Sos1
ENSMUSG00000024421	Lama3	5.385	5.959	4.162	Lama3
ENSMUSG00000026479	Lamc2	4.972	6.375	4.85	Lamc2
ENSMUSG00000026639	Lamb3	5.651	5.784	2.777	Lamb3
ENSMUSG00000031502	Col4a1	6.548	7.019	5.027	Col4a1
ENSMUSG00000041075	Fzd7	4.504	4.919	3.689	Fzd7
ENSMUSG00000050288	Fzd2	3.665	3.722	0.9334	Fzd2
ENSMUSG00000052684	Jun	8.773	9.019	7.409	Jun
ENSMUSG00000001761	Smo	4.783	4.205	2.374	Smo
ENSMUSG00000002900	Lamb1	6.255	5.701	3.476	Lamb1
ENSMUSG00000003031	Cdkn1b	5.037	4.245	3.851	Cdkn1b
ENSMUSG00000005533	Igf1r	4.808	3.813	3.538	Igf1r
ENSMUSG00000005871	Apc	4.481	3.556	3.172	Apc
ENSMUSG00000006134	Crkl	3.981	3.179	2.843	Crkl
ENSMUSG00000016933	Plcg1	4.664	4.627	2.902	Plcg1
ENSMUSG00000017737	Mmp9	6.945	6.387	4.365	Mmp9
ENSMUSG00000017776	Crk	5.509	4.79	4.381	Crk
ENSMUSG00000019846	Lama4	4.214	3.542	2.435	Lama4
ENSMUSG00000020122	Egfr	4.719	4.199	2.794	Egfr
ENSMUSG00000020366	Mapk9	4.476	3.592	3.432	Mapk9
ENSMUSG00000021109	Hif1a	6.399	6.142	4.963	Hif1a
ENSMUSG00000021318	Gli3	3.66	2.785	1.671	Gli3
ENSMUSG00000021936	Mapk8	4.516	3.755	3.465	Mapk8
ENSMUSG00000023951	Vegfa	5.475	5.317	3.907	Vegfa
ENSMUSG00000024151	Msh2	4.398	3.976	3.257	Msh2
ENSMUSG00000025423	Pias2	3.796	3.099	2.85	Pias2
ENSMUSG00000026104	Stat1	6.734	6.711	5.481	Stat1
ENSMUSG00000026430	Rassf5	5.598	3.312	2.109	Rassf5
ENSMUSG00000026478	Lamc1	5.654	3.697	2.459	Lamc1
ENSMUSG00000026842	Abl1	4.829	4.407	3.44	Abl1
ENSMUSG00000030849	Fgfr2	6.226	5.805	2.245	Fgfr2
ENSMUSG00000031274	Col4a5	3.528	0.7679	-0.5592	Col4a5
ENSMUSG00000031503	Col4a2	6.66	6.106	4.122	Col4a2
ENSMUSG00000031740	Mmp2	6.231	3.367	-0.8603	Mmp2
ENSMUSG00000031834	Pik3r2	5.682	5.022	4.706	Pik3r2
ENSMUSG00000032440	Tgfbr2	4.574	2.114	-0.6172	Tgfbr2
ENSMUSG00000035105	Egln3	4.316	4.149	3.035	Egln3
ENSMUSG00000036856	Wnt4	6.525	4.645	3.281	Wnt4
ENSMUSG00000041417	Pik3r1	4.918	4.808	3.741	Pik3r1
ENSMUSG00000042826	Fgf11	3.434	1.348	0.8764	Fgf11
ENSMUSG00000044167	Foxo1	3.748	3.06	2.084	Foxo1
ENSMUSG00000048701	Ccdc6	6.103	4.233	3.862	Ccdc6
ENSMUSG00000057329	Bcl2	3.827	2.805	2.211	Bcl2
ENSMUSG00000058709	Egln2	5.329	4.45	3.864	Egln2
ENSMUSG00000000782	Tcf7	5.766	2.11	5.819	Tcf7
ENSMUSG00000002603	Tgfb1	3.357	2.609	3.764	Tgfb1
ENSMUSG00000018012	Rac3	5.124	3.412	5.229	Rac3
ENSMUSG00000020184	Mdm2	4.918	4.568	5.891	Mdm2
ENSMUSG00000020919	Stat5b	3.243	2.978	4.727	Stat5b
ENSMUSG00000021025	Nfkbia	7.577	7.525	9.674	Nfkbia
ENSMUSG00000027164	Traf6	3.356	3.198	5.034	Traf6
ENSMUSG00000050965	Prkca	3.655	3.314	6.227	Prkca
ENSMUSG00000057367	Birc2	5.482	5.262	6.254	Birc2
ENSMUSG00000062248	Cks2	4.645	3.733	4.791	Cks2
ENSMUSG00000004936	Map2k1	6.558	4.764	5.404	Map2k1
ENSMUSG00000019966	Kitl	5.439	0.9835	3.389	Kitl
ENSMUSG00000025551	Fgf14	6.759	1.976	3.909	Fgf14
ENSMUSG00000026193	Fn1	6.933	3.072	4.238	Fn1
ENSMUSG00000032402	Smad3	4.768	2.893	3.339	Smad3

## Sheet: mmu05203
Go back to pathways
Viral carcinogenesis - Mus musculus (mouse)
gene_id	mgi_symbol	cTEC_log2 (FPKM)	immature_TEC_log2 (FPKM)	Aire_negative_mature_TEC_log2 (FPKM)	pubmed
ENSMUSG00000024164	C3	2.201	8.525	8.051	C3
ENSMUSG00000026879	Gsn	3.123	7.584	5.031	Gsn
ENSMUSG00000070348	Ccnd1	0.02014	5.371	4.432	Ccnd1
ENSMUSG00000073409	H2-Q6	4.737	8.115	7.905	H2-Q6
ENSMUSG00000000184	Ccnd2	5.422	5.429	6.643	Ccnd2
ENSMUSG00000001249	Hpn	1.668	2.664	3.337	Hpn
ENSMUSG00000002565	Scin	2.567	3.614	4.75	Scin
ENSMUSG00000003873	Bax	5.366	5.443	7.159	Bax
ENSMUSG00000004040	Stat3	5.78	6.601	7.68	Stat3
ENSMUSG00000004043	Stat5a	2.345	5.553	6.576	Stat5a
ENSMUSG00000004698	Hdac9	-2.899	1.635	4.738	Hdac9
ENSMUSG00000010936	Vac14	3.402	3.709	4.344	Vac14
ENSMUSG00000016206	H2-M3	3.857	4.992	5.653	H2-M3
ENSMUSG00000016283	H2-M2	4.395	6.802	7.444	H2-M2
ENSMUSG00000020962	Gtf2a1	3.325	3.436	5.441	Gtf2a1
ENSMUSG00000021457	Syk	0.7391	3.189	4.519	Syk
ENSMUSG00000023067	Cdkn1a	3.569	5.556	6.147	Cdkn1a
ENSMUSG00000024521	Pmaip1	-1.103	3.819	3.909	Pmaip1
ENSMUSG00000025225	Nfkb2	6.219	6.371	7.953	Nfkb2
ENSMUSG00000025499	Hras1	4.37	5.097	5.412	Hras1
ENSMUSG00000026875	Traf1	-0.1931	3.642	5.739	Traf1
ENSMUSG00000026942	Traf2	4.128	4.348	5.485	Traf2
ENSMUSG00000027646	Src	4.929	5.232	6.236	Src
ENSMUSG00000032462	Pik3cb	0.4483	2.136	3.881	Pik3cb
ENSMUSG00000039191	Rbpj	2.964	3.525	4.904	Rbpj
ENSMUSG00000042228	Lyn	1.321	3.474	3.508	Lyn
ENSMUSG00000044303	Cdkn2a	-2.156	3.274	3.991	Cdkn2a
ENSMUSG00000047898	Ccr4	-1.064	-0.03832	4.791	Ccr4
ENSMUSG00000060550	H2-Q7	4.451	8.465	8.55	H2-Q7
ENSMUSG00000061232	H2-K1	8.672	10.43	10.72	H2-K1
ENSMUSG00000067212	H2-T23	6.706	7.649	7.815	H2-T23
ENSMUSG00000067235	H2-Q10	2.193	4.241	4.541	H2-Q10
ENSMUSG00000073411	H2-D1	8.163	10.1	10.33	H2-D1
ENSMUSG00000073802	Cdkn2b	-1.182	3.619	4.595	Cdkn2b
ENSMUSG00000091705	H2-Q2	3.041	3.692	3.969	H2-Q2
ENSMUSG00000002325	Irf9	5.548	5.769	3.58	Irf9
ENSMUSG00000021756	Il6st	5.511	5.816	2.956	Il6st
ENSMUSG00000024079	Eif2ak2	4.281	4.372	2.37	Eif2ak2
ENSMUSG00000052684	Jun	8.773	9.019	7.409	Jun
ENSMUSG00000000708	Kat2b	4.066	3.794	2.549	Kat2b
ENSMUSG00000003031	Cdkn1b	5.037	4.245	3.851	Cdkn1b
ENSMUSG00000005034	Prkacb	4.74	3.958	2.786	Prkacb
ENSMUSG00000016528	Mapkapk2	5.769	5.114	4.652	Mapkapk2
ENSMUSG00000021178	Psmc1	6.591	5.559	5.442	Psmc1
ENSMUSG00000022475	Hdac7	5.356	3.598	2.305	Hdac7
ENSMUSG00000030339	Ltbr	6.104	4.559	3.292	Ltbr
ENSMUSG00000031834	Pik3r2	5.682	5.022	4.706	Pik3r2
ENSMUSG00000034245	Hdac11	5.006	4.684	3.705	Hdac11
ENSMUSG00000038648	Creb3l2	5.394	3.667	3.407	Creb3l2
ENSMUSG00000041417	Pik3r1	4.918	4.808	3.741	Pik3r1
ENSMUSG00000006457	Actn3	6.052	5.57	7.746	Actn3
ENSMUSG00000019942	Cdk1	4.613	3.701	5.592	Cdk1
ENSMUSG00000020184	Mdm2	4.918	4.568	5.891	Mdm2
ENSMUSG00000020275	Rel	2.247	1.618	3.329	Rel
ENSMUSG00000020919	Stat5b	3.243	2.978	4.727	Stat5b
ENSMUSG00000021025	Nfkbia	7.577	7.525	9.674	Nfkbia
ENSMUSG00000069045	Ddx3y	3.589	-5.099	2.184	Ddx3y

## Sheet: mmu04920
Go back to pathways
Adipocytokine signaling pathway - Mus musculus (mouse)
gene_id	mgi_symbol	cTEC_log2 (FPKM)	immature_TEC_log2 (FPKM)	Aire_negative_mature_TEC_log2 (FPKM)	pubmed
ENSMUSG00000004040	Stat3	5.78	6.601	7.68	Stat3
ENSMUSG00000024401	Tnf	-1.929	0.6505	4.242	Tnf
ENSMUSG00000024981	Acsl5	4.365	4.842	5.452	Acsl5
ENSMUSG00000026942	Traf2	4.128	4.348	5.485	Traf2
ENSMUSG00000027513	Pck1	-2.682	-0.148	4.702	Pck1
ENSMUSG00000028645	Slc2a1	3.108	3.96	4.485	Slc2a1
ENSMUSG00000031537	Ikbkb	4.546	4.982	6.256	Ikbkb
ENSMUSG00000042010	Acacb	-2.037	3.067	5.091	Acacb
ENSMUSG00000018566	Slc2a4	3.372	3.956	2.814	Slc2a4
ENSMUSG00000031278	Acsl4	3.8	4.305	2.848	Acsl4
ENSMUSG00000020366	Mapk9	4.476	3.592	3.432	Mapk9
ENSMUSG00000021936	Mapk8	4.516	3.755	3.465	Mapk8
ENSMUSG00000024900	Cpt1a	6.772	4.434	3.823	Cpt1a
ENSMUSG00000030341	Tnfrsf1a	6.056	5.373	4.307	Tnfrsf1a
ENSMUSG00000038205	Prkab2	4.046	1.992	0.9763	Prkab2
ENSMUSG00000038894	Irs2	5.115	3.737	3.421	Irs2
ENSMUSG00000053113	Socs3	7.383	6.961	5.086	Socs3
ENSMUSG00000021025	Nfkbia	7.577	7.525	9.674	Nfkbia
ENSMUSG00000023947	Nfkbie	5.214	5.157	6.451	Nfkbie
ENSMUSG00000030168	Adipor2	4.259	4.05	5.772	Adipor2
ENSMUSG00000030595	Nfkbib	4.607	3.927	5.169	Nfkbib
ENSMUSG00000026778	Prkcq	4.33	1.802	2.257	Prkcq

## Sheet: mmu00071
Go back to pathways
Fatty acid metabolism - Mus musculus (mouse)
gene_id	mgi_symbol	cTEC_log2 (FPKM)	immature_TEC_log2 (FPKM)	Aire_negative_mature_TEC_log2 (FPKM)	pubmed
ENSMUSG00000074207	Adh1	-2.289	4.689	2.037	Adh1
ENSMUSG00000024132	Eci1	4.027	4.173	4.96	Eci1
ENSMUSG00000024981	Acsl5	4.365	4.842	5.452	Acsl5
ENSMUSG00000028607	Cpt2	3.162	3.169	4.568	Cpt2
ENSMUSG00000029098	Acox3	2.303	3.256	3.525	Acox3
ENSMUSG00000029455	Aldh2	5.474	6.389	3.602	Aldh2
ENSMUSG00000010025	Aldh3a2	6.489	6.324	5.26	Aldh3a2
ENSMUSG00000021417	Eci2	5.302	4.485	3.981	Eci2
ENSMUSG00000024900	Cpt1a	6.772	4.434	3.823	Cpt1a
ENSMUSG00000026003	Acadl	5.688	4.693	3.708	Acadl
ENSMUSG00000030861	Acadsb	4.978	3.826	3.49	Acadsb
ENSMUSG00000036880	Acaa2	5.37	3.905	1.488	Acaa2
ENSMUSG00000053644	Aldh7a1	5.873	4.198	3.476	Aldh7a1
ENSMUSG00000018574	Acadvl	5.572	4.44	4.601	Acadvl
ENSMUSG00000025745	Hadha	6.09	4.897	5.56	Hadha
ENSMUSG00000026687	Aldh9a1	5.053	3.574	3.59	Aldh9a1
ENSMUSG00000027984	Hadh	6.614	5.085	5.38	Hadh
ENSMUSG00000032047	Acat1	5.323	3.515	4.758	Acat1
ENSMUSG00000059447	Hadhb	6.371	4.926	5.069	Hadhb

## Sheet: mmu04640
Go back to pathways
Hematopoietic cell lineage - Mus musculus (mouse)
gene_id	mgi_symbol	cTEC_log2 (FPKM)	immature_TEC_log2 (FPKM)	Aire_negative_mature_TEC_log2 (FPKM)	pubmed
ENSMUSG00000005540	Fcer2a	-2.943	4.698	4.433	Fcer2a
ENSMUSG00000047139	Cd24a	3.437	8.271	6.054	Cd24a
ENSMUSG00000000869	Il4	-3.993	-2.68	3.422	Il4
ENSMUSG00000001507	Itga3	4.585	5.272	5.697	Itga3
ENSMUSG00000005672	Kit	0.4382	4.486	5.113	Kit
ENSMUSG00000020279	Il9r	-2.18	0.9713	4.648	Il9r
ENSMUSG00000024401	Tnf	-1.929	0.6505	4.242	Tnf
ENSMUSG00000026073	Il1r2	1.584	4.38	5.347	Il1r2
ENSMUSG00000026616	Cr2	-3.533	2.552	3.671	Cr2
ENSMUSG00000026770	Il2ra	1.614	3.719	4.227	Il2ra
ENSMUSG00000030748	Il4ra	5.919	6.035	7.237	Il4ra
ENSMUSG00000060586	H2-Eb1	9.722	9.831	11.67	H2-Eb1
ENSMUSG00000073889	Il11ra1	3.028	5.032	5.194	Il11ra1
ENSMUSG00000016494	Cd34	3.557	1.138	-1.472	Cd34
ENSMUSG00000025014	Dntt	4.107	0.2407	0.1292	Dntt
ENSMUSG00000040329	Il7	6.611	5.896	4.109	Il7
ENSMUSG00000053044	Cd8b1	4.134	-0.3941	-0.4306	Cd8b1
ENSMUSG00000053977	Cd8a	4.134	0.4096	0.05804	Cd8a
ENSMUSG00000002033	Cd3g	4.225	0.3417	0.6631	Cd3g
ENSMUSG00000019966	Kitl	5.439	0.9835	3.389	Kitl
ENSMUSG00000023274	Cd4	3.705	-0.08745	2.52	Cd4

## Sheet: mmu04370
Go back to pathways
VEGF signaling pathway - Mus musculus (mouse)
gene_id	mgi_symbol	cTEC_log2 (FPKM)	immature_TEC_log2 (FPKM)	Aire_negative_mature_TEC_log2 (FPKM)	pubmed
ENSMUSG00000004791	Pgf	-2.489	3.962	1.207	Pgf
ENSMUSG00000004864	Mapk13	2.239	7.096	5.49	Mapk13
ENSMUSG00000004951	Hspb1	0.1665	7.899	5.085	Hspb1
ENSMUSG00000020573	Pik3cg	-0.2516	4.952	0.6954	Pik3cg
ENSMUSG00000020901	Pik3r5	0.5352	5.809	2.549	Pik3r5
ENSMUSG00000034330	Plcg2	2.796	4.838	3.409	Plcg2
ENSMUSG00000025499	Hras1	4.37	5.097	5.412	Hras1
ENSMUSG00000027544	Nfatc2	0.06578	2.752	4.647	Nfatc2
ENSMUSG00000027646	Src	4.929	5.232	6.236	Src
ENSMUSG00000032462	Pik3cb	0.4483	2.136	3.881	Pik3cb
ENSMUSG00000032487	Ptgs2	-0.0785	3.853	8.1	Ptgs2
ENSMUSG00000033220	Rac2	2.611	4.279	6.824	Rac2
ENSMUSG00000056220	Pla2g4a	1.18	4.439	6.104	Pla2g4a
ENSMUSG00000003847	Nfat5	4.924	5.14	3.961	Nfat5
ENSMUSG00000016528	Mapkapk2	5.769	5.114	4.652	Mapkapk2
ENSMUSG00000016933	Plcg1	4.664	4.627	2.902	Plcg1
ENSMUSG00000023951	Vegfa	5.475	5.317	3.907	Vegfa
ENSMUSG00000031834	Pik3r2	5.682	5.022	4.706	Pik3r2
ENSMUSG00000041417	Pik3r1	4.918	4.808	3.741	Pik3r1
ENSMUSG00000053436	Mapk14	5.486	5.177	4.344	Mapk14
ENSMUSG00000018012	Rac3	5.124	3.412	5.229	Rac3
ENSMUSG00000050965	Prkca	3.655	3.314	6.227	Prkca
ENSMUSG00000004936	Map2k1	6.558	4.764	5.404	Map2k1
ENSMUSG00000030265	Kras	5.228	3.932	4.447	Kras
ENSMUSG00000061878	Sphk1	4.627	2.938	4.28	Sphk1

## Sheet: mmu00460
Go back to pathways
Cyanoamino acid metabolism - Mus musculus (mouse)
gene_id	mgi_symbol	cTEC_log2 (FPKM)	immature_TEC_log2 (FPKM)	Aire_negative_mature_TEC_log2 (FPKM)	pubmed
ENSMUSG00000006344	Ggt5	4.948	5.898	5.434	Ggt5
ENSMUSG00000040471	Ggt6	0.7759	3.325	1.339	Ggt6
ENSMUSG00000020534	Shmt1	3.851	2.304	3.7	Shmt1

## Sheet: mmu05219
Go back to pathways
Bladder cancer - Mus musculus (mouse)
gene_id	mgi_symbol	cTEC_log2 (FPKM)	immature_TEC_log2 (FPKM)	Aire_negative_mature_TEC_log2 (FPKM)	pubmed
ENSMUSG00000032380	Dapk2	-0.1104	5.757	5.317	Dapk2
ENSMUSG00000070348	Ccnd1	0.02014	5.371	4.432	Ccnd1
ENSMUSG00000023067	Cdkn1a	3.569	5.556	6.147	Cdkn1a
ENSMUSG00000025499	Hras1	4.37	5.097	5.412	Hras1
ENSMUSG00000044303	Cdkn2a	-2.156	3.274	3.991	Cdkn2a
ENSMUSG00000062312	Erbb2	1.864	3.693	4.968	Erbb2
ENSMUSG00000017737	Mmp9	6.945	6.387	4.365	Mmp9
ENSMUSG00000020122	Egfr	4.719	4.199	2.794	Egfr
ENSMUSG00000023951	Vegfa	5.475	5.317	3.907	Vegfa
ENSMUSG00000031740	Mmp2	6.231	3.367	-0.8603	Mmp2
ENSMUSG00000020184	Mdm2	4.918	4.568	5.891	Mdm2
ENSMUSG00000004936	Map2k1	6.558	4.764	5.404	Map2k1

## Sheet: mmu05212
Go back to pathways
Pancreatic cancer - Mus musculus (mouse)
gene_id	mgi_symbol	cTEC_log2 (FPKM)	immature_TEC_log2 (FPKM)	Aire_negative_mature_TEC_log2 (FPKM)	pubmed
ENSMUSG00000004791	Pgf	-2.489	3.962	1.207	Pgf
ENSMUSG00000020573	Pik3cg	-0.2516	4.952	0.6954	Pik3cg
ENSMUSG00000020901	Pik3r5	0.5352	5.809	2.549	Pik3r5
ENSMUSG00000070348	Ccnd1	0.02014	5.371	4.432	Ccnd1
ENSMUSG00000004040	Stat3	5.78	6.601	7.68	Stat3
ENSMUSG00000007659	Bcl2l1	4.141	4.167	6.782	Bcl2l1
ENSMUSG00000027695	Pld1	3.971	4.744	6.95	Pld1
ENSMUSG00000031537	Ikbkb	4.546	4.982	6.256	Ikbkb
ENSMUSG00000032462	Pik3cb	0.4483	2.136	3.881	Pik3cb
ENSMUSG00000033220	Rac2	2.611	4.279	6.824	Rac2
ENSMUSG00000044303	Cdkn2a	-2.156	3.274	3.991	Cdkn2a
ENSMUSG00000062312	Erbb2	1.864	3.693	4.968	Erbb2
ENSMUSG00000021253	Tgfb3	3.191	4.017	1.396	Tgfb3
ENSMUSG00000020122	Egfr	4.719	4.199	2.794	Egfr
ENSMUSG00000020366	Mapk9	4.476	3.592	3.432	Mapk9
ENSMUSG00000021936	Mapk8	4.516	3.755	3.465	Mapk8
ENSMUSG00000023951	Vegfa	5.475	5.317	3.907	Vegfa
ENSMUSG00000026104	Stat1	6.734	6.711	5.481	Stat1
ENSMUSG00000031834	Pik3r2	5.682	5.022	4.706	Pik3r2
ENSMUSG00000032440	Tgfbr2	4.574	2.114	-0.6172	Tgfbr2
ENSMUSG00000041417	Pik3r1	4.918	4.808	3.741	Pik3r1
ENSMUSG00000002603	Tgfb1	3.357	2.609	3.764	Tgfb1
ENSMUSG00000018012	Rac3	5.124	3.412	5.229	Rac3
ENSMUSG00000004936	Map2k1	6.558	4.764	5.404	Map2k1
ENSMUSG00000032402	Smad3	4.768	2.893	3.339	Smad3

[truncated: 110 more sheets: mmu05211, mmu05210, mmu05214, mmu00750, mmu00900, mmu04930, mmu04672, mmu05164, mmu04670, mmu05166, mmu05161, mmu05160, mmu05162, mmu05169, mmu00062, mmu04070, mmu00512, mmu00340, mmu00510, mmu05168 …]
