# Supplementary material for: Population and single-cell genomics reveal the Aire dependency, relief from Polycomb silencing, and distribution of self-antigen expression in thymic epithelia
Source: Genome Res. 2014 Dec;24(12):1918–31. doi: 10.1101/gr.171645.113 (PMC4248310; doi:10.1101/gr.171645.113)
Supplement: Supplemental Material [file supp_gr.171645.113_Supplemental_Table5.xlsx]

## Sheet: Overview
Supplementary Table 5. Genes whose expression is characteristic of three fundamental TEC types (cTEC, immature mTEC and mature mTEC).
Worksheet	Contents
cTEC	Genes characteristic of cTEC
immature mTEC	Genes characteristic of immature mTEC
Aire negative mature mTEC	Genes characteristic of Aire negative mature mTEC

## Sheet: cTEC
gene_id	gene_name	cTEC FPKM (log2)	immature mTEC FPKM (log2)	AIRE negative mature mTEC FPKM (log2)
ENSMUSG00000021477	Ctsl	12.53	8.995	5.823
ENSMUSG00000023043	Krt18	11.59	9.269	9.373
ENSMUSG00000005054	Cstb	10.83	7.447	8.309
ENSMUSG00000023235	Ccl25	10.93	3.862	8.809
ENSMUSG00000049382	Krt8	11.1	9.44	9.953
ENSMUSG00000020096	Tbata	10.72	5.166	8.94
ENSMUSG00000017754	Pltp	9.778	6.639	4.5
ENSMUSG00000072423	Psmb11	7.97	-0.6538	-0.2305
ENSMUSG00000028669	1110049F12Rik	8.626	3.909	3.99
ENSMUSG00000061353	Cxcl12	8.098	1.828	-1.366
ENSMUSG00000023968	Crip3	9.492	3.733	8.457
ENSMUSG00000031451	Gas6	9.164	7.341	6.83
ENSMUSG00000039236	Isg20	8.449	3.676	4.322
ENSMUSG00000016534	Lamp2	9.022	6.65	6.998
ENSMUSG00000037034	Pax1	8.561	5.046	3.674
ENSMUSG00000022010	Tsc22d1	9.222	8.062	7.256
ENSMUSG00000033767	D930015E06Rik	8.499	4.433	5.823
ENSMUSG00000015396	Cd83	8.229	0.2665	4.697
ENSMUSG00000044786	Zfp36	8.781	7.502	7.528
ENSMUSG00000005779	Psmb4	8.614	6.487	6.84
ENSMUSG00000027634	Ndrg3	8.067	4.745	4.417
ENSMUSG00000020792	Exoc7	8.015	4.552	4.532
ENSMUSG00000048285	Frmd6	7.922	4.313	1.258
ENSMUSG00000053931	Cnn3	8.547	6.962	7.461
ENSMUSG00000034021	Pds5b	7.795	2.829	4.261
ENSMUSG00000029059	2810405K02Rik	8.376	6.494	6.77
ENSMUSG00000018899	Irf1	8.421	6.186	6.97
ENSMUSG00000054889	Dsp	8.488	7.324	6.146
ENSMUSG00000024640	Psat1	7.746	4.321	3.769
ENSMUSG00000003849	Nqo1	7.782	2.028	4.57
ENSMUSG00000022415	Syngr1	7.009	1.26	0.7241
ENSMUSG00000048826	Dact2	7.56	3.83	3.924
ENSMUSG00000016495	5033414D02Rik	7.999	5.985	5.355
ENSMUSG00000092299	Psmb9	8.096	6.608	6.329
ENSMUSG00000026980	Ly75	7.451	2.565	3.94
ENSMUSG00000027566	Psma7	8.035	6.753	6.761
ENSMUSG00000032966	Fkbp1a	7.906	6.45	6.553
ENSMUSG00000054364	Rhob	7.585	5.31	4.717
ENSMUSG00000028386	Slc46a2	7.687	5.762	4.163
ENSMUSG00000067071	Hes6	7.824	6.631	6.303
ENSMUSG00000037260	Hgsnat	7.171	3.978	3.167
ENSMUSG00000020261	Slc36a1	6.889	2.771	2.114
ENSMUSG00000020483	Dynll2	7.594	5.911	5.665
ENSMUSG00000016496	Cd274	7.47	4.857	5.436
ENSMUSG00000031633	Slc25a4	7.687	6.312	6.652
ENSMUSG00000023055	Calcoco1	7.222	4.772	3.621
ENSMUSG00000032314	Etfa	7.549	5.684	6.299
ENSMUSG00000022636	Alcam	7.563	5.404	6.387
ENSMUSG00000024085	Man2a1	7.125	4.507	2.998
ENSMUSG00000045573	Penk	6.423	1.555	1.557
ENSMUSG00000020424	Gatsl3	6.799	3.262	2.272
ENSMUSG00000000305	Cdh4	6.513	0.8209	2.078
ENSMUSG00000027314	Dll4	6.617	0.5917	2.661
ENSMUSG00000039105	Atp6v1g1	7.417	6.134	5.626
ENSMUSG00000030751	Psma1	7.441	6.164	6.258
ENSMUSG00000034854	Mfsd12	6.646	1.366	2.958
ENSMUSG00000019804	Snx3	7.268	5.534	5.647
ENSMUSG00000039873	Neurl2	6.218	1.111	-0.7992
ENSMUSG00000026193	Fn1	6.933	3.072	4.238
ENSMUSG00000000753	Serpinf1	6.267	0.4448	1.364
ENSMUSG00000028675	Pnrc2	7.322	5.947	5.646
ENSMUSG00000030701	Plekhb1	6.255	1.347	0.7559
ENSMUSG00000058297	Spock2	7.073	3.312	4.98
ENSMUSG00000057880	Abat	5.915	-0.8366	-0.3666
ENSMUSG00000032959	Pebp1	7.316	6.187	5.512
ENSMUSG00000022205	Sub1	7.281	5.56	6.041
ENSMUSG00000079355	Ccrl1	6.73	3.775	0.2749
ENSMUSG00000025551	Fgf14	6.759	1.976	3.909
ENSMUSG00000022378	Fam49b	6.821	4.214	3.93
ENSMUSG00000089715	Cbx6	7.023	5.119	3.246
ENSMUSG00000040181	Fmo1	6.943	4.368	4.783
ENSMUSG00000005625	Psmd4	7.223	5.977	6.045
ENSMUSG00000025129	Ppp1r27	6.184	-0.7677	1.606
ENSMUSG00000033763	Mtss1l	6.975	5.211	3.362
ENSMUSG00000021807	2700060E02Rik	7.144	5.957	5.989
ENSMUSG00000024900	Cpt1a	6.772	4.434	3.823
ENSMUSG00000026000	Lancl1	6.9	5.023	4.828
ENSMUSG00000021665	Hexb	7.077	5.887	4.28
ENSMUSG00000044349	Snhg11	5.999	1.367	0.2138
ENSMUSG00000017428	Psmd11	7.009	5.752	5.697
ENSMUSG00000015749	Anp32e	7.081	5.685	6.062
ENSMUSG00000005973	Rcn1	6.936	5.447	3.461
ENSMUSG00000028932	Psmc2	7.059	5.828	6.019
ENSMUSG00000046879	Irgm1	7.04	5.941	3.605
ENSMUSG00000020315	Spnb2	6.888	5.469	3.836
ENSMUSG00000030088	Aldh1l1	6.272	2.999	1.21
ENSMUSG00000039067	Psmd7	6.887	5.685	5.353
ENSMUSG00000006299	Aamp	6.858	5.471	5.559
ENSMUSG00000027339	Rassf2	6.865	3.138	5.623
ENSMUSG00000029103	Lrpap1	6.676	4.915	4.438
ENSMUSG00000001473	Tubb6	6.889	5.84	4.727
ENSMUSG00000020844	Nxn	6.831	5.601	4.362
ENSMUSG00000024044	Epb4.1l3	6.88	4.806	5.86
ENSMUSG00000020232	Hmg20b	6.731	5.355	5.243
ENSMUSG00000051048	P4ha3	5.916	1.853	0.07455
ENSMUSG00000024942	Capn1	6.626	4.962	4.525
ENSMUSG00000068882	Ssb	6.806	5.753	5.566
ENSMUSG00000069729	Arid1b	6.501	4.449	4.161
ENSMUSG00000020780	Srp68	6.624	4.701	4.983
ENSMUSG00000031740	Mmp2	6.231	3.367	-0.8603
ENSMUSG00000036856	Wnt4	6.525	4.645	3.281
ENSMUSG00000032348	Gsta4	6.584	4.904	3.852
ENSMUSG00000050812	AI314180	6.578	4.644	4.882
ENSMUSG00000052512	Nav2	6.514	4.625	3.534
ENSMUSG00000035069	Oma1	6.631	2.769	5.139
ENSMUSG00000029201	Ugdh	6.456	4.415	4.039
ENSMUSG00000026269	Rnpepl1	6.566	4.989	4.7
ENSMUSG00000028024	Enpep	5.398	-0.7872	-0.331
ENSMUSG00000029330	Cds1	6.209	3.546	2.424
ENSMUSG00000022106	Rcbtb2	6.599	5.269	4.656
ENSMUSG00000027984	Hadh	6.614	5.085	5.38
ENSMUSG00000003541	Ier3	6.288	4.045	2.592
ENSMUSG00000004936	Map2k1	6.558	4.764	5.404
ENSMUSG00000021178	Psmc1	6.591	5.559	5.442
ENSMUSG00000032563	Mrpl3	6.288	4.252	4.09
ENSMUSG00000059898	Dsc3	6.525	5.278	3.755
ENSMUSG00000028179	Cth	5.565	-1.134	1.149
ENSMUSG00000037624	Kcnk2	5.607	1.348	-0.9512
ENSMUSG00000069601	Ank3	6.307	4.396	3.695
ENSMUSG00000012017	Scarf2	5.811	2.262	-1.877
ENSMUSG00000028776	Tinagl1	6.159	3.52	3.789
ENSMUSG00000021537	Cetn3	6.537	5.15	5.437
ENSMUSG00000030340	Scnn1a	6.18	3.906	3.434
ENSMUSG00000022054	Nefm	5.367	-1.379	0.4218
ENSMUSG00000025085	Ablim1	6.545	5.282	5.514
ENSMUSG00000029153	Ociad2	6.447	5.133	3.036
ENSMUSG00000000253	Gmpr	6.467	5.223	2.807
ENSMUSG00000001911	Nfix	6.452	5.221	4.342
ENSMUSG00000033059	Pygb	6.248	4.344	3.199
ENSMUSG00000026229	Psmd1	6.444	5.212	5.111
ENSMUSG00000040289	Hey1	6.21	4.207	1.612
ENSMUSG00000030554	Synm	6.01	3.372	1.061
ENSMUSG00000050017	Pitpnb	6.286	4.48	4.596
ENSMUSG00000063931	Pepd	6.459	3.944	5.349
ENSMUSG00000001521	Tulp3	6.249	4.49	3.796
ENSMUSG00000030352	Tspan9	5.845	2.761	-0.257
ENSMUSG00000020484	Xbp1	6.461	5.43	5.145
ENSMUSG00000021832	Psmc6	6.381	5.109	4.835
ENSMUSG00000059447	Hadhb	6.371	4.926	5.069
ENSMUSG00000027227	Sord	5.897	3.057	1.572
ENSMUSG00000028484	Psip1	6.366	5.087	4.964
ENSMUSG00000020089	Ppa1	6.308	4.838	4.556
ENSMUSG00000021286	Zfyve21	6.03	3.033	3.691
ENSMUSG00000041548	Hspb8	6.188	4.418	4.155
ENSMUSG00000005656	Snx6	6.269	4.798	4.416
ENSMUSG00000091337	Eid1	6.294	4.973	4.524
ENSMUSG00000017639	Rab11fip4	6.251	4.529	4.804
ENSMUSG00000048701	Ccdc6	6.103	4.233	3.862
ENSMUSG00000031068	Glrx3	6.303	5.12	4.913
ENSMUSG00000002799	Jag2	6.287	5.054	2.904
ENSMUSG00000001833	Sept7	6.318	5.214	4.877
ENSMUSG00000021737	Psmd6	6.34	5.323	5.145
ENSMUSG00000021483	Cdk20	5.814	3.061	0.7322
ENSMUSG00000042684	Npl	5.406	1.097	1.301
ENSMUSG00000029405	G3bp2	6.327	5.291	4.71
ENSMUSG00000017764	Zswim1	5.562	1.995	1.845
ENSMUSG00000024538	Ppic	5.988	3.858	2.351
ENSMUSG00000031176	Dynlt3	6.258	5.037	4.44
ENSMUSG00000030417	Pdcd5	6.285	5.172	4.684
ENSMUSG00000013076	Amotl1	6.197	4.798	3.095
ENSMUSG00000066026	Dhrs3	6.137	4.579	4.018
ENSMUSG00000059412	Fxyd2	6.255	3.434	5.091
ENSMUSG00000021474	Sfxn1	5.746	2.921	2.773
ENSMUSG00000001435	Col18a1	6.277	5.218	2.89
ENSMUSG00000021193	Pitrm1	5.944	3.827	3.676
ENSMUSG00000024556	Me2	6.18	4.855	3.445
ENSMUSG00000002741	Ykt6	6.188	4.892	4.717
ENSMUSG00000020720	Psmd12	6.177	4.854	4.822
ENSMUSG00000058056	Palld	6.265	5.25	3.488
ENSMUSG00000030339	Ltbr	6.104	4.559	3.292
ENSMUSG00000057751	Megf6	5.718	2.457	2.935
ENSMUSG00000047842	Diras2	5.58	2.34	2.137
ENSMUSG00000026188	Tmem169	5.029	-0.881	-2.86
ENSMUSG00000028245	Nsmaf	5.969	4.07	3.867
ENSMUSG00000032560	Dnajc13	6.049	3.878	4.446
ENSMUSG00000037379	Spon2	5.401	1.662	-0.7538
ENSMUSG00000040875	Osbpl10	5.883	3.77	2.712
ENSMUSG00000041731	Pgm5	5.964	4.139	2.176
ENSMUSG00000020042	Btbd11	6.13	3.922	4.916
ENSMUSG00000002058	Unc119	5.836	3.646	2.085
ENSMUSG00000041408	Wapal	6.151	4.852	5.098
ENSMUSG00000040998	Npnt	5.973	2.809	4.353
ENSMUSG00000020538	Srebf1	6.008	4.505	4.103
ENSMUSG00000003477	Inmt	4.953	-2.984	-1.572
ENSMUSG00000025153	Fasn	5.924	3.987	4.216
ENSMUSG00000023959	Clic5	6.034	3.484	4.693
ENSMUSG00000036225	Kctd1	5.999	4.552	2.327
ENSMUSG00000020811	Wscd1	5.802	3.704	0.1326
ENSMUSG00000034751	Mast4	5.713	3.268	3.33
ENSMUSG00000030275	Etnk1	5.987	4.548	3.534
ENSMUSG00000037410	Tbc1d2b	5.908	4.21	3.638
ENSMUSG00000015961	Adss	6.059	4.908	4.827
ENSMUSG00000024423	Impact	5.665	3.208	3.169
ENSMUSG00000021068	Nin	5.535	2.664	1.113
ENSMUSG00000009292	Trpm2	5.386	1.726	2.044
ENSMUSG00000046897	Zfp740	6.049	4.922	3.564
ENSMUSG00000002379	Ndufa11	5.933	4.433	4.334
ENSMUSG00000053644	Aldh7a1	5.873	4.198	3.476
ENSMUSG00000034993	Vat1	5.899	4.324	3.029
ENSMUSG00000025268	Maged2	5.872	4.225	3.275
ENSMUSG00000025260	Hsd17b10	6.015	4.853	3.655
ENSMUSG00000043207	Zmpste24	5.812	4.021	3.857
ENSMUSG00000031865	Dctn1	6.033	5.018	4.909
ENSMUSG00000039234	Sec24d	5.864	4.313	4.272
ENSMUSG00000029032	Arhgef16	5.998	4.344	4.897
ENSMUSG00000062760	1810041L15Rik	5.415	2.38	1.071
ENSMUSG00000042428	Mgat3	5.93	4.604	1.318
ENSMUSG00000040007	Bahd1	5.837	4.222	4.05
ENSMUSG00000032018	Sc5d	5.868	4.379	4.215
ENSMUSG00000036504	Phpt1	5.998	4.732	4.967
ENSMUSG00000031585	Gtf2e2	6	4.056	4.981
ENSMUSG00000026187	Xrcc5	5.794	4.122	2.456
ENSMUSG00000026430	Rassf5	5.598	3.312	2.109
ENSMUSG00000025190	Got1	5.719	3.232	3.86
ENSMUSG00000022951	Rcan1	5.874	4.567	2.945
ENSMUSG00000025917	Cops5	5.918	4.687	4.76
ENSMUSG00000058446	Znrf2	5.835	4.411	4.22
ENSMUSG00000026102	Inpp1	5.811	3.858	4.306
ENSMUSG00000021930	6330409N04Rik	5.916	4.782	4.541
ENSMUSG00000048756	Foxo3	5.504	3.041	2.775
ENSMUSG00000026478	Lamc1	5.654	3.697	2.459
ENSMUSG00000043099	Hic1	5.357	2.42	0.6242
ENSMUSG00000047067	Dusp28	5.227	1.861	0.9085
ENSMUSG00000037016	Frem2	5.112	-0.1666	1.393
ENSMUSG00000038128	Camk4	5.74	4.107	3.919
ENSMUSG00000078970	Wdr92	5.888	4.734	4.749
ENSMUSG00000025607	Copg2	5.843	4.593	3.967
ENSMUSG00000029781	Fkbp9	5.844	4.606	2.982
ENSMUSG00000062604	Srpk2	5.673	3.876	3.044
ENSMUSG00000027574	Nkain4	5.579	3.482	1.1
ENSMUSG00000053110	Yap1	5.842	4.622	2.667
ENSMUSG00000036298	Slc2a13	5.055	0.6216	1.222
ENSMUSG00000058013	Sept11	5.764	4.292	4.112
ENSMUSG00000068749	Psma5	5.727	4.111	4.134
ENSMUSG00000039232	Stx11	5.824	3.86	4.606
ENSMUSG00000032263	Bckdhb	5.659	3.916	3.259
ENSMUSG00000001098	Kctd10	5.764	4.369	4.104
ENSMUSG00000025246	Tbl1x	5.803	4.457	4.556
ENSMUSG00000031575	Ash2l	5.779	4.468	4.131
ENSMUSG00000061311	Rag1	4.819	0.2029	0.3411
ENSMUSG00000072829	Gm7292	5.855	4.824	4.744
ENSMUSG00000022747	St3gal6	5.35	2.65	2.684
ENSMUSG00000030087	Klf15	4.715	-0.5969	-1.694
ENSMUSG00000051934	Spats2	5.478	3.07	3.301
ENSMUSG00000032002	Dcun1d5	5.808	4.737	4.492
ENSMUSG00000062753	AI413582	5.796	4.01	4.776
ENSMUSG00000026090	2010300C02Rik	5.376	2.974	0.5761
ENSMUSG00000055148	Klf2	5.541	3.136	3.717
ENSMUSG00000051041	Olfml1	5.142	2.024	-0.3285
ENSMUSG00000024059	Clip4	5.653	4.024	4.269
ENSMUSG00000041598	Cdc42ep4	5.66	3.434	4.317
ENSMUSG00000037643	Prkci	5.668	4.354	3.786
ENSMUSG00000002365	Snx9	5.659	3.986	4.325
ENSMUSG00000019966	Kitl	5.439	0.9835	3.389
ENSMUSG00000008575	Nfib	5.389	3.197	1.363
ENSMUSG00000018537	Pcgf2	5.602	4.133	3.207
ENSMUSG00000037119	D15Ertd621e	5.654	4.371	4.18
ENSMUSG00000038725	Pkhd1l1	4.89	-1.224	1.072
ENSMUSG00000062929	Cfl2	5.575	4.035	2.439
ENSMUSG00000021676	Iqgap2	5.142	1.232	2.169
ENSMUSG00000024940	Ltbp3	5.59	4.111	1.722
ENSMUSG00000056999	Ide	5.663	4.435	3.783
ENSMUSG00000042351	Grap2	4.732	0.4586	-0.8183
ENSMUSG00000026356	Dars	5.676	4.556	4.439
ENSMUSG00000026748	Plxdc2	5.565	4.097	0.4997
ENSMUSG00000022186	Oxct1	5.682	4.665	3.618
ENSMUSG00000090206	Tepp	4.919	1.407	0.6784
ENSMUSG00000020541	Tom1l1	5.51	4.008	3.545
ENSMUSG00000072964	Bhlhb9	5.419	3.675	3.66
ENSMUSG00000029270	Fam69a	5.568	4.321	1.685
ENSMUSG00000004473	Clec11a	4.56	-0.08999	-2.397
ENSMUSG00000017734	Dbndd2	5.442	3.847	2.673
ENSMUSG00000057561	Eif1a	5.586	4.243	4.481
ENSMUSG00000053477	Tcf4	5.592	4.509	3.222
ENSMUSG00000009035	Tmem184b	5.557	4.242	4.36
ENSMUSG00000038648	Creb3l2	5.394	3.667	3.407
ENSMUSG00000028760	Eif4g3	5.589	4.568	3.114
ENSMUSG00000032527	Pccb	5.58	4.167	4.567
ENSMUSG00000022475	Hdac7	5.356	3.598	2.305
ENSMUSG00000039252	Lgi2	4.96	1.893	0.03778
ENSMUSG00000000811	Txnrd3	5.411	3.573	3.897
ENSMUSG00000045659	Plekha7	5.443	4.08	1.928
ENSMUSG00000022052	Ppp2r2a	5.523	4.497	4.446
ENSMUSG00000031591	Asah1	5.433	4.143	3.762
ENSMUSG00000036880	Acaa2	5.37	3.905	1.488
ENSMUSG00000020793	Galr2	4.466	-2.688	-2.842
ENSMUSG00000028743	Akr7a5	5.359	3.775	3.874
ENSMUSG00000020432	Tcn2	5.384	3.837	4.041
ENSMUSG00000027160	Ccdc34	5.085	2.786	2.406
ENSMUSG00000017774	Myo1c	5.433	4.351	3.839
ENSMUSG00000001497	Pax9	5.447	4.425	3.943
ENSMUSG00000047879	Usp14	5.399	4.219	4.205
ENSMUSG00000021822	Plau	5.238	3.524	3.251
ENSMUSG00000030056	Isy1	5.307	3.824	3.724
ENSMUSG00000030737	Slco2b1	4.642	0.9812	-0.06346
ENSMUSG00000023927	Satb1	5.099	2.886	2.972
ENSMUSG00000055435	Maf	5.134	2.559	3.179
ENSMUSG00000026626	Ppp2r5a	5.362	4.004	4.169
ENSMUSG00000025555	Farp1	5.259	3.734	2.405
ENSMUSG00000034349	Smc4	5.39	3.85	4.298
ENSMUSG00000022122	Ednrb	4.395	-1.934	-2.569
ENSMUSG00000038884	A230050P20Rik	5.345	4.111	3.019
ENSMUSG00000022836	Mylk	4.83	1.522	1.887
ENSMUSG00000028710	Atpaf1	5.274	3.743	3.813
ENSMUSG00000038668	Lpar1	5.397	4.358	2.934
ENSMUSG00000037933	Bicd2	5.241	3.655	3.692
ENSMUSG00000034614	Pik3ip1	5.357	4.21	2.026
ENSMUSG00000042426	Dhx29	5.164	3.39	3.107
ENSMUSG00000022178	Jub	5.377	4.343	1.097
ENSMUSG00000023030	Slc11a2	5.14	3.326	2.34
ENSMUSG00000054723	Vmac	5.258	3.854	2.575
ENSMUSG00000025612	Bach1	5.346	4.253	4.074
ENSMUSG00000005233	Spc25	5.264	1.767	3.927
ENSMUSG00000025139	Tollip	5.268	3.986	3.935
ENSMUSG00000058173	BC017612	4.849	2.179	1.712
ENSMUSG00000022665	Ccdc80	5.227	3.867	0.8897
ENSMUSG00000022241	Tars	5.321	4.292	4.126
ENSMUSG00000024583	Txnl1	5.303	4.223	3.874
ENSMUSG00000022389	Tef	5.169	3.664	3.61
ENSMUSG00000034903	Cobll1	4.994	2.95	1.422
ENSMUSG00000018378	Cuedc1	5.129	3.571	1.888
ENSMUSG00000033565	Rbfox2	5.199	3.942	3.102
ENSMUSG00000026657	Frmd4a	5.079	3.447	2.288
ENSMUSG00000017697	Ada	4.893	1.406	2.646
ENSMUSG00000030201	Lrp6	5.225	3.976	4.08
ENSMUSG00000042558	Adprhl2	5.179	3.887	3.73
ENSMUSG00000017767	1700020C07Rik	4.255	-1.381	-3.282
ENSMUSG00000037111	Setd7	5.038	3.397	1.299
ENSMUSG00000038894	Irs2	5.115	3.737	3.421
ENSMUSG00000024590	Lmnb1	5.182	3.946	4.044
ENSMUSG00000040151	Hs2st1	5.15	3.861	3.939
ENSMUSG00000043384	Gprasp1	4.995	3.308	2.015
ENSMUSG00000027378	Nphp1	4.983	3.255	1.958
ENSMUSG00000030555	Ttc23	5.091	3.737	3.663
ENSMUSG00000026687	Aldh9a1	5.053	3.574	3.59
ENSMUSG00000057531	Dtnbp1	5.133	3.946	3.177
ENSMUSG00000032531	Amotl2	5.183	4.164	1.983
ENSMUSG00000059486	Kbtbd2	5.077	3.705	3.468
ENSMUSG00000031309	Rps6ka3	5.049	3.482	3.607
ENSMUSG00000024909	Efemp2	4.935	3.149	0.1577
ENSMUSG00000051226	Gm9851	4.206	-2.045	-3.736
ENSMUSG00000041046	Ramp3	4.933	-0.4757	3.157
ENSMUSG00000017144	Rnd3	4.921	3.109	2.123
ENSMUSG00000000409	Lck	4.604	1.738	1.303
ENSMUSG00000037295	Ldlrap1	5.02	3.557	3.145
ENSMUSG00000039477	Tnrc18	5.118	4	2.862
ENSMUSG00000067787	Blcap	5.117	3.755	4.019
ENSMUSG00000029287	Tgfbr3	4.581	1.708	1.116
ENSMUSG00000047428	Dlk2	4.465	-0.2211	1.216
ENSMUSG00000034522	Zfp395	4.794	2.643	0.3705
ENSMUSG00000040562	Gstm2	4.845	2.871	0.4421
ENSMUSG00000037712	Fermt2	5.132	4.125	3.171
ENSMUSG00000038633	Degs1	5.06	3.817	3.218
ENSMUSG00000022808	Snx4	5.085	3.927	3.703
ENSMUSG00000031112	2610018G03Rik	4.877	3.045	2.656
ENSMUSG00000001995	Sipa1l2	4.805	1.282	2.744
ENSMUSG00000039298	Cdk5rap2	4.956	3.41	3.046
ENSMUSG00000027784	Ppm1l	4.825	2.853	1.864
ENSMUSG00000023034	Nr4a1	4.894	3.151	2.573
ENSMUSG00000041120	Nbl1	4.706	2.351	2.174
ENSMUSG00000001100	Poldip2	5.108	4.094	3.636
ENSMUSG00000000085	Scmh1	5.097	4.053	2.798
ENSMUSG00000038658	C030046E11Rik	4.902	3.119	3.213
ENSMUSG00000037270	4932438A13Rik	5.064	3.925	3.246
ENSMUSG00000006442	Srm	5.102	3.695	4.09
ENSMUSG00000007411	Mark3	5.098	4.079	3.905
ENSMUSG00000022905	Kpna1	5.032	3.606	3.813
ENSMUSG00000039473	Ubn1	5.031	3.817	3.664
ENSMUSG00000002319	Ipo4	5.066	3.981	3.625
ENSMUSG00000028385	Snx30	4.936	2.52	3.43
ENSMUSG00000037580	Gch1	4.499	1.305	1.557
ENSMUSG00000025372	Baiap2	5.042	3.035	3.917
ENSMUSG00000053044	Cd8b1	4.134	-0.3941	-0.4306
ENSMUSG00000058325	Dock1	4.92	3.398	3.228
ENSMUSG00000032898	Fbxo21	4.905	3.364	3.04
ENSMUSG00000071180	2810008M24Rik	4.907	3.36	3.391
ENSMUSG00000068606	Gm4841	4.575	1.254	1.975
ENSMUSG00000025477	Inpp5a	5.037	3.605	3.981
ENSMUSG00000032058	Ppp2r1b	4.848	3.183	2.93
ENSMUSG00000046480	Scn4b	4.835	3.16	2.555
ENSMUSG00000063273	Naa15	4.965	3.733	3.442
ENSMUSG00000027163	Commd9	4.995	3.876	3.564
ENSMUSG00000030861	Acadsb	4.978	3.826	3.49
ENSMUSG00000064326	Siva1	4.916	3.574	2.189
ENSMUSG00000032440	Tgfbr2	4.574	2.114	-0.6172
ENSMUSG00000012296	Tjap1	4.945	3.46	3.727
ENSMUSG00000042961	Egflam	4.586	-0.8956	2.175
ENSMUSG00000020806	Rhbdf2	4.96	3.635	3.799
ENSMUSG00000041117	Ccdc8	4.82	3.194	2.884
ENSMUSG00000002033	Cd3g	4.225	0.3417	0.6631
ENSMUSG00000048232	Fbxo10	4.98	3.939	3.05
ENSMUSG00000019917	Sept10	4.906	3.626	2.471
ENSMUSG00000030084	Plxna1	4.971	3.912	3.792
ENSMUSG00000027475	Kif3b	4.831	3.328	3.256
ENSMUSG00000020473	Aebp1	4.59	2.291	-1.017
ENSMUSG00000024143	Rhoq	4.775	3.106	0.2752
ENSMUSG00000028086	Fbxw7	4.833	2.995	3.375
ENSMUSG00000025014	Dntt	4.107	0.2407	0.1292
ENSMUSG00000030872	Gga2	4.929	3.801	3.725
ENSMUSG00000022438	Parvb	4.248	0.8759	0.3208
ENSMUSG00000053977	Cd8a	4.134	0.4096	0.05804
ENSMUSG00000030613	Ccdc90b	4.933	3.558	3.904
ENSMUSG00000062421	Arf2	4.702	2.911	2.544
ENSMUSG00000033068	Entpd6	4.675	2.233	2.796
ENSMUSG00000030138	Bms1	4.893	3.742	3.597
ENSMUSG00000032788	Pdxk	4.682	2.904	2.514
ENSMUSG00000038576	Susd4	4.497	2.105	-0.7178
ENSMUSG00000023885	Thbs2	4.679	2.919	2.672
ENSMUSG00000026249	Serpine2	4.585	2.514	2.19
ENSMUSG00000042203	Tbc1d22b	4.783	3.352	3.378
ENSMUSG00000032402	Smad3	4.768	2.893	3.339
ENSMUSG00000052331	Ankrd44	4.276	1.241	-0.6524
ENSMUSG00000035443	Thyn1	4.809	3.181	3.547
ENSMUSG00000038332	Sesn1	4.715	3.07	3.14
ENSMUSG00000040649	Rimklb	3.98	-0.6392	-0.3133
ENSMUSG00000032702	Kank1	4.832	2.21	3.685
ENSMUSG00000028383	Hsdl2	4.863	3.829	3.373
ENSMUSG00000020173	Cobl	4.768	3.439	3.097
ENSMUSG00000013089	Etv5	4.138	0.7293	0.5021
ENSMUSG00000020986	Sec23a	4.802	3.291	3.601
ENSMUSG00000019960	Dusp6	4.724	3.28	1.559
ENSMUSG00000030742	Lat	4.03	-0.3059	0.3124
ENSMUSG00000022018	1190002H23Rik	4.359	1.226	1.759
ENSMUSG00000023008	Fmnl3	4.426	1.773	2.061
ENSMUSG00000032352	Lrrc1	4.724	3.384	2.846
ENSMUSG00000036249	Rbm43	4.778	3.653	2.779
ENSMUSG00000050910	Cdr2l	4.457	2.281	1.206
ENSMUSG00000044148	1810030O07Rik	4.773	3.664	3.358
ENSMUSG00000043461	1110032A04Rik	3.962	0.1657	-2.811
ENSMUSG00000021760	Gpx8	4.681	3.281	-1.747
ENSMUSG00000003731	Kpna6	4.794	3.787	3.642
ENSMUSG00000028636	Ppcs	4.739	3.558	3.45
ENSMUSG00000031095	Cul4b	4.711	3.437	2.813
ENSMUSG00000026574	Dpt	3.914	-2.01	-4.339
ENSMUSG00000020900	Myh10	4.321	1.758	1.539
ENSMUSG00000020766	Galk1	4.612	2.83	3.018
ENSMUSG00000078670	Fam174b	4.273	1.568	0.472
ENSMUSG00000018217	Pmp22	4.199	1.252	-1.924
ENSMUSG00000038013	Wipf2	4.598	2.987	2.488
ENSMUSG00000047415	Gpr68	4.626	3.055	3.125
ENSMUSG00000053647	Gpr30	3.901	-1.301	-1.563
ENSMUSG00000039607	Rbms3	4.595	3.028	2.187
ENSMUSG00000034667	Xpot	4.654	3.224	3.285
ENSMUSG00000036503	Rnf13	4.742	3.71	3.314
ENSMUSG00000020696	Rffl	4.674	3.45	2.95
ENSMUSG00000053897	Slc39a8	4.268	1.702	-1.922
ENSMUSG00000031245	Hmgn5	4.682	3.442	3.52
ENSMUSG00000022197	Pdzd2	4.566	3.023	2.683
ENSMUSG00000039982	Dtx4	4.42	2.4	-1.22
ENSMUSG00000026594	Ralgps2	4.392	2.3	0.6277
ENSMUSG00000070858	Gm1673	4.467	2.634	0.4014
ENSMUSG00000011837	Snapc2	4.664	3.487	3.254
ENSMUSG00000037017	Zscan21	4.701	3.656	3.433
ENSMUSG00000039633	Lonrf1	4.708	3.47	3.686
ENSMUSG00000052105	1110012J17Rik	3.879	0.1039	-2.427
ENSMUSG00000010660	Plcd1	4.693	3.624	1.993
ENSMUSG00000020877	Scrn2	4.602	3.231	3.18
ENSMUSG00000030763	Lcmt1	4.71	3.638	3.701
ENSMUSG00000058756	Thra	4.427	2.483	1.382
ENSMUSG00000038417	Fig4	4.602	2.73	3.239
ENSMUSG00000061288	Taok3	4.558	3.057	2.595
ENSMUSG00000090150	Acad11	4.694	3.659	3.43
ENSMUSG00000052085	Dock8	4.203	0.6338	1.552
ENSMUSG00000025105	Bnc1	4.402	2.422	-0.5997
ENSMUSG00000001482	Def8	4.677	3.627	3.17
ENSMUSG00000023348	Trip6	4.688	3.681	3.077
ENSMUSG00000061024	Rrs1	4.648	3.572	3.37
ENSMUSG00000015127	Unkl	4.524	2.482	3.036
ENSMUSG00000045636	Mtus1	4.344	2.263	0.1391
ENSMUSG00000029312	Klhl8	4.5	2.942	2.033
ENSMUSG00000048677	Tpcn2	4.64	3.55	2.057
ENSMUSG00000032411	Tfdp2	4.583	3.312	2.13
ENSMUSG00000020427	Igfbp3	4.503	2.963	-0.2957
ENSMUSG00000034317	Trim59	4.549	2.963	3.179
ENSMUSG00000000290	Itgb2	3.809	-1.27	-1.117
ENSMUSG00000022454	Nell2	4.252	1.919	-1.939
ENSMUSG00000026778	Prkcq	4.33	1.802	2.257
ENSMUSG00000027332	Ivd	4.583	3.358	2.845
ENSMUSG00000037086	1110059M19Rik	4.138	-1.302	1.44
ENSMUSG00000074140	Zfp319	4.208	1.744	0.937
ENSMUSG00000059824	Dbp	4.623	3.465	3.538
ENSMUSG00000036256	Igfbp7	3.872	0.3199	-0.6429
ENSMUSG00000039197	Adk	4.419	2.683	2.001
ENSMUSG00000062175	Tgif2	4.58	3.394	2.556
ENSMUSG00000056174	Col8a2	3.79	-2.455	-1.994
ENSMUSG00000021238	Aldh6a1	4.433	2.787	1.194
ENSMUSG00000049288	Lix1l	4.619	3.597	1.984
ENSMUSG00000004891	Nes	3.779	-0.5595	-0.1721
ENSMUSG00000031342	Gpm6b	3.85	-0.011	0.3094
ENSMUSG00000030510	Lass3	3.937	0.7045	-1.439
ENSMUSG00000030539	Sema4b	4.595	3.583	3.21
ENSMUSG00000042340	Ctf1	4.416	2.832	1.543
ENSMUSG00000036580	Spg20	4.404	2.783	1.969
ENSMUSG00000034761	Map4k5	4.427	2.915	1.315
ENSMUSG00000038351	Sgsm2	4.423	2.922	0.9429
ENSMUSG00000037325	Bbs7	4.245	1.701	2.181
ENSMUSG00000024299	Adamts10	4.067	1.418	-0.7175
ENSMUSG00000047712	Ust	3.909	0.7423	-0.2953
ENSMUSG00000024431	Nr3c1	4.554	3.308	3.54
ENSMUSG00000001281	Itgb7	3.79	0.2529	-1.006
ENSMUSG00000074622	Mafb	4.382	2.811	2.724
ENSMUSG00000020284	1810043G02Rik	4.442	3.123	2.327
ENSMUSG00000021375	Kif13a	4.504	3.407	3.065
ENSMUSG00000032194	Kank2	4.397	2.949	2.294
ENSMUSG00000024944	Arl2	4.478	3.306	2.405
ENSMUSG00000006567	Atp7b	3.713	-2.856	-2.941
ENSMUSG00000037211	Spry1	4.251	2.333	0.4993
ENSMUSG00000079003	Samd1	4.435	3.131	3.141
ENSMUSG00000041308	Sntb2	4.466	3.311	0.9438
ENSMUSG00000018846	Pank3	4.444	3.233	2.882
ENSMUSG00000017561	Crlf3	4.442	2.981	3.229
ENSMUSG00000029326	Enoph1	4.451	3.276	3.271
ENSMUSG00000006494	Pdk1	4.243	2.279	2.378
ENSMUSG00000004885	Crabp2	4.369	2.937	1.957
ENSMUSG00000021190	Lgmn	4.465	3.402	3.242
ENSMUSG00000008976	Gabpa	4.471	3.437	3.319
ENSMUSG00000036109	Mbnl3	4.358	1.827	2.961
ENSMUSG00000007379	Dennd2c	4.282	1.463	2.631
ENSMUSG00000028532	Cachd1	4.456	3.385	3.084
ENSMUSG00000050520	Cldn8	3.714	0.1795	-2.961
ENSMUSG00000028139	Riiad1	4.127	1.99	-0.04784
ENSMUSG00000020234	4930404N11Rik	4.127	0.2677	2.029
ENSMUSG00000070390	Nlrp1b	4.268	2.639	1.344
ENSMUSG00000032035	Ets1	4.201	2.427	1.037
ENSMUSG00000035392	Dennd1a	4.26	2.694	1.877
ENSMUSG00000027630	Tbl1xr1	4.389	3.271	3.005
ENSMUSG00000051316	Taf7	4.267	2.192	2.782
ENSMUSG00000028223	Decr1	4.349	3.15	2.454
ENSMUSG00000022464	Slc38a4	4.403	3.395	1.337
ENSMUSG00000023921	Mut	4.27	2.708	2.843
ENSMUSG00000029769	Ccdc136	3.976	1.585	-0.6711
ENSMUSG00000072949	Acot1	4.155	2.365	0.5343
ENSMUSG00000028020	Glrb	3.605	-0.5174	-1.698
ENSMUSG00000048376	F2r	4.291	2.972	1.03
ENSMUSG00000030513	Pcsk6	3.923	1.403	-0.3233
ENSMUSG00000000861	Bcl11a	4.221	2.703	0.5573
ENSMUSG00000060961	Slc4a4	3.691	-0.02997	0.432
ENSMUSG00000038205	Prkab2	4.046	1.992	0.9763
ENSMUSG00000051343	Rab11fip5	4.16	2.532	1.037
ENSMUSG00000029672	Fam3c	4.333	3.303	2.335
ENSMUSG00000036545	Adamts2	3.944	0.4951	1.628
ENSMUSG00000020520	Galnt10	4.274	1.982	3.056
ENSMUSG00000026004	1110028C15Rik	4.262	3.01	1.629
ENSMUSG00000055322	Tns1	3.838	1.186	-0.05343
ENSMUSG00000047986	Palm3	3.545	-2.873	-0.6378
ENSMUSG00000034730	Bai1	4.01	1.895	2.033
ENSMUSG00000063887	Nlgn1	3.873	1.451	0.7605
ENSMUSG00000026383	Epb4.1l5	4.224	2.323	2.97
ENSMUSG00000035107	Dcbld2	3.846	1.346	1.158
ENSMUSG00000027739	Rab33b	4.071	2.327	2.039
ENSMUSG00000069808	Fam57a	4.29	3.272	2.696
ENSMUSG00000000325	Arvcf	4.158	2.709	1.811
ENSMUSG00000022742	Cpox	4.284	3.257	2.985
ENSMUSG00000006262	Mob1b	4.26	3.159	2.923
ENSMUSG00000043557	Mdga1	4.114	2.539	0.9577
ENSMUSG00000048490	Nrip1	4.065	2.341	1.931
ENSMUSG00000036676	Tmtc3	4.232	3.074	2.398
ENSMUSG00000030966	Trim21	4.271	3.246	2.068
ENSMUSG00000069089	Cdk7	4.217	3.026	2.575
ENSMUSG00000048078	Odz4	4.116	2.589	0.2421
ENSMUSG00000037234	Hook3	4.21	3.025	2.889
ENSMUSG00000034449	Dhrs11	4.073	2.239	2.444
ENSMUSG00000023092	Fhl1	3.91	1.74	-0.1629
ENSMUSG00000042750	Bex2	4.156	2.224	2.808
ENSMUSG00000022329	Stk3	4.18	2.96	2.302
ENSMUSG00000042359	Osbpl6	4.24	3.218	1.024
ENSMUSG00000018648	Dusp14	4.169	2.826	2.915
ENSMUSG00000052102	Gnpda1	4.076	2.53	2.434
ENSMUSG00000026014	Raph1	4.223	3.186	2.744
ENSMUSG00000000340	Dbt	4.09	2.618	2.492
ENSMUSG00000026718	Stam	4.179	3.007	2.602
ENSMUSG00000050623	1700019N12Rik	3.64	0.6908	-2.076
ENSMUSG00000026782	Abi2	4.159	2.932	2.497
ENSMUSG00000059482	2610301B20Rik	4.156	2.938	2.386
ENSMUSG00000001555	Fkbp10	4.209	3.189	-1.025
ENSMUSG00000014980	Tsen15	4.1	2.732	2.448
ENSMUSG00000062563	Cys1	3.466	-2.907	-3.988
ENSMUSG00000047767	Atg16l2	3.997	2.317	2.207
ENSMUSG00000069171	Nr2f1	3.595	0.5826	-1.573
ENSMUSG00000020608	Smc6	4.169	2.768	3.066
ENSMUSG00000029190	D5Ertd579e	4.192	3.173	2.845
ENSMUSG00000054863	Fam19a5	3.829	1.608	1.219
ENSMUSG00000046556	Zfp319	4.033	2.505	2.236
ENSMUSG00000028035	Dnajb4	4.135	2.95	2.027
ENSMUSG00000060935	AI597468	4.108	2.835	2.025
ENSMUSG00000041935	AW549877	4.17	3.122	2.458
ENSMUSG00000058881	Zfp516	4.074	2.716	2.714
ENSMUSG00000009418	Nav1	3.934	2.128	0.7147
ENSMUSG00000030505	Prmt3	4.112	2.901	2.629
ENSMUSG00000047388	Atmin	4.098	2.847	2.719
ENSMUSG00000037761	Actr5	3.983	2.088	2.357
ENSMUSG00000062619	2310039H08Rik	4.052	2.663	2.149
ENSMUSG00000039081	Zfp503	4.002	2.466	0.3595
ENSMUSG00000041624	Gucy1a2	3.55	0.5198	-0.807
ENSMUSG00000071547	Nt5dc2	3.841	1.455	1.801
ENSMUSG00000021820	Camk2g	4.142	3.123	2.609
ENSMUSG00000030870	Ubfd1	4.122	2.851	3.071
ENSMUSG00000091191	Gm17334	3.698	1.245	0.9308
ENSMUSG00000034327	Kctd9	4.1	2.718	3.032
ENSMUSG00000025036	Sfxn2	3.854	1.976	1.081
ENSMUSG00000026705	Klhl20	3.975	2.52	2.164
ENSMUSG00000060548	Tnfrsf19	3.433	0.1834	0.183
ENSMUSG00000024781	Lipa	3.858	2.078	1.649
ENSMUSG00000001120	Pcbp3	3.814	1.839	1.961
ENSMUSG00000033720	Sfxn5	3.475	0.4979	0.03241
ENSMUSG00000081769	Gm12216	3.887	1.541	2.303
ENSMUSG00000046733	Gprc5a	3.49	0.5844	-1.073
ENSMUSG00000034278	Dnajc17	4.03	2.925	2.557
ENSMUSG00000031274	Col4a5	3.528	0.7679	-0.5592
ENSMUSG00000039616	Mocos	3.874	2.313	1.646
ENSMUSG00000022364	Wdr67	3.882	2.36	1.118
ENSMUSG00000028576	Ift74	4.001	2.884	1.921
ENSMUSG00000003500	Impdh1	3.764	1.863	1.237
ENSMUSG00000052759	Gpr25	3.445	-2.159	0.4846
ENSMUSG00000021371	Ccdc90a	3.942	2.64	2.573
ENSMUSG00000020475	Pgam2	3.653	1.414	1.19
ENSMUSG00000030055	Rab43	3.964	2.763	2.143
ENSMUSG00000057497	Fam136a	3.998	2.924	2.728
ENSMUSG00000036615	Rfxap	3.969	2.845	1.974
ENSMUSG00000024424	Ttc39c	3.929	2.695	1.793
ENSMUSG00000048572	E030010A14Rik	3.742	1.9	-0.4475
ENSMUSG00000004880	Lbr	3.982	2.957	2.467
ENSMUSG00000025586	Cpeb1	3.776	0.4206	2.067
ENSMUSG00000016494	Cd34	3.557	1.138	-1.472
ENSMUSG00000036721	Zscan12	3.77	2.075	1.613
ENSMUSG00000040729	AK129341	3.606	1.324	1.375
ENSMUSG00000040433	Zbtb38	3.975	2.839	2.974
ENSMUSG00000066643	Wdr35	3.922	2.75	1.966
ENSMUSG00000033752	Mnd1	3.605	1.475	1.222
ENSMUSG00000044548	Dact1	3.653	1.488	1.696
ENSMUSG00000016386	Mpped2	3.873	2.658	-0.5252
ENSMUSG00000052713	Zfp608	3.8	2.349	-0.5181
ENSMUSG00000054708	Ankrd24	3.891	2.743	2.609
ENSMUSG00000071856	Mcc	3.888	2.73	1.631
ENSMUSG00000029205	Chrna9	3.682	-0.09429	1.845
ENSMUSG00000043300	B3galnt1	3.925	2.898	1.6
ENSMUSG00000044707	Ccnjl	3.726	2.046	1.463
ENSMUSG00000055612	Cdca7	3.744	2.156	1.339
ENSMUSG00000079434	Neu2	3.79	-1.243	2.357
ENSMUSG00000049823	Zbtb12	3.889	2.83	2.633
ENSMUSG00000057541	Pus7	3.894	2.858	2.392
ENSMUSG00000022837	Iqcb1	3.82	2.544	2.185
ENSMUSG00000031290	Lrch2	3.505	1.194	-0.274
ENSMUSG00000026189	Pecr	3.74	2.234	1.351
ENSMUSG00000034485	Uaca	3.764	2.344	1.448
ENSMUSG00000022099	Epb4.9	3.682	1.062	2.045
ENSMUSG00000029366	Dck	3.727	2.25	1.656
ENSMUSG00000074743	Thbd	3.672	2.018	-3.162
ENSMUSG00000038543	BC028528	3.62	1.799	1.497
ENSMUSG00000038046	Rnmtl1	3.574	1.643	1.184
ENSMUSG00000021198	Unc79	3.627	1.885	-0.5622
ENSMUSG00000057329	Bcl2	3.827	2.805	2.211
ENSMUSG00000032456	Nmnat3	3.566	1.679	0.3336
ENSMUSG00000048772	Tmem53	3.814	2.797	1.051
ENSMUSG00000000794	Kcnn3	3.686	2.254	1.405
ENSMUSG00000026395	Ptprc	3.644	2.084	-0.1141
ENSMUSG00000044066	Cep68	3.785	2.692	2.314
ENSMUSG00000026730	Pter	3.549	1.683	0.5888
ENSMUSG00000019951	Uhrf1bp1l	3.741	2.528	1.573
ENSMUSG00000028709	Mob3c	3.663	2.074	2.227
ENSMUSG00000036036	Zfp57	3.412	1.18	-0.9054
ENSMUSG00000034875	Nudt19	3.751	2.66	2.527
ENSMUSG00000050373	Snx21	3.729	2.585	1.712
ENSMUSG00000064061	Dzip3	3.716	2.543	2.05
ENSMUSG00000042826	Fgf11	3.434	1.348	0.8764
ENSMUSG00000023274	Cd4	3.705	-0.08745	2.52
ENSMUSG00000038718	Pbx3	3.74	2.691	2.126
ENSMUSG00000021265	Slc25a29	3.652	2.342	1.884
ENSMUSG00000039309	Edaradd	3.648	2.35	2.35
ENSMUSG00000022253	1110020G09Rik	3.602	2.157	1.538
ENSMUSG00000001305	Rrp15	3.718	2.688	2.307
ENSMUSG00000089876	Tmem102	3.674	2.504	2.448
ENSMUSG00000035840	Lysmd3	3.612	1.845	2.242
ENSMUSG00000057469	E2f6	3.709	2.695	1.107
ENSMUSG00000025104	Hdgfrp3	3.706	2.686	1.054
ENSMUSG00000069045	Ddx3y	3.589	-5.099	2.184
ENSMUSG00000020605	Hs1bp3	3.398	1.366	1.312
ENSMUSG00000002308	Cd320	3.659	2.26	2.539
ENSMUSG00000037148	Arhgap10	3.684	2.67	2.098
ENSMUSG00000043421	Hilpda	3.477	1.777	1.25
ENSMUSG00000027351	Spred1	3.658	2.573	2.124
ENSMUSG00000005763	Cd247	3.367	0.9265	1.336
ENSMUSG00000026827	Gpd2	3.622	2.456	2.097
ENSMUSG00000030522	Mtmr10	3.559	2.202	1.343
ENSMUSG00000042388	Dlgap3	3.475	0.6618	1.863
ENSMUSG00000041440	Gk5	3.627	0.3901	2.529
ENSMUSG00000032030	Cul5	3.648	2.625	2.093
ENSMUSG00000037541	Shank2	3.406	-0.8517	1.608
ENSMUSG00000078922	Tgtp1	3.549	2.228	-1.04
ENSMUSG00000019841	Rev3l	3.618	2.541	2.386
ENSMUSG00000022120	Rnf219	3.429	1.737	1.031
ENSMUSG00000031657	Heatr3	3.628	2.617	2.264
ENSMUSG00000031910	Has3	3.342	1.384	-1.093
ENSMUSG00000050323	2310030N02Rik	3.368	1.505	1.011
ENSMUSG00000079560	Hoxa3	3.449	1.857	-0.8681
ENSMUSG00000022025	Lect1	3.469	1.017	1.949
ENSMUSG00000056121	Fez2	3.519	2.208	1.009
ENSMUSG00000079733	Tmem181b-ps	3.516	2.203	2.122
ENSMUSG00000063889	Crem	3.565	2.428	2.353
ENSMUSG00000052504	Epha3	3.534	-0.5668	2.292
ENSMUSG00000022323	Hrsp12	3.479	2.074	1.954
ENSMUSG00000034560	A230046K03Rik	3.567	2.461	2.206
ENSMUSG00000040040	Ift88	3.592	2.591	2.341
ENSMUSG00000075592	Nynrin	3.502	2.23	-0.06866
ENSMUSG00000062646	Ganc	3.479	2.133	2.081
ENSMUSG00000026672	Optn	3.361	1.64	1.449
ENSMUSG00000026135	Zfp142	3.495	2.229	2.264
ENSMUSG00000035992	Fnip1	3.466	2.134	2.143
ENSMUSG00000014907	Naf1	3.545	2.49	2.409
ENSMUSG00000042099	Kank3	3.451	2.12	-0.332
ENSMUSG00000035697	Hmha1	3.361	1.349	1.746
ENSMUSG00000022177	Haus4	3.523	2.453	1.72
ENSMUSG00000034593	Myo5a	3.398	1.914	1.809
ENSMUSG00000035164	Zc3h12c	3.392	1.911	1.884
ENSMUSG00000027439	Gzf1	3.519	2.469	1.926
ENSMUSG00000001517	Foxm1	3.48	1.952	2.333
ENSMUSG00000020829	Slc46a1	3.485	2.393	0.8793
ENSMUSG00000069114	Zbtb10	3.416	2.318	1.676
ENSMUSG00000027340	Slc23a2	3.376	2.155	1.224
ENSMUSG00000027293	Ehd4	3.388	2.21	2.006
ENSMUSG00000035305	Ror1	3.36	0.9427	2.163
ENSMUSG00000060260	Pwwp2b	3.329	2.18	1.669

## Sheet: immature_mTEC
gene_id	gene_name	cTEC FPKM (log2)	immature mTEC FPKM (log2)	AIRE negative mature mTEC FPKM (log2)
ENSMUSG00000067736	Gm10222	9.342	10.5	9.051
ENSMUSG00000000983	Expi	1.293	9.681	7.568
ENSMUSG00000002985	Apoe	6.008	8.876	5.67
ENSMUSG00000079017	Ifi27l2a	7.363	9.052	5.419
ENSMUSG00000089901	Gm8113	4.251	8.697	6.476
ENSMUSG00000045545	Krt14	3.321	8.636	6.377
ENSMUSG00000075602	Ly6a	2.293	8.4	5.609
ENSMUSG00000022587	Ly6e	7.747	8.892	7.706
ENSMUSG00000028464	Tpm2	4.009	8.594	6.979
ENSMUSG00000018339	Gpx3	1.43	7.932	4.155
ENSMUSG00000026185	Igfbp5	1.091	7.921	4.28
ENSMUSG00000022037	Clu	3.521	8.49	6.805
ENSMUSG00000047139	Cd24a	3.437	8.271	6.054
ENSMUSG00000025432	Avil	-1.187	7.754	3.946
ENSMUSG00000030263	Lrmp	2.252	7.645	3.512
ENSMUSG00000030218	Mgp	4.166	7.794	1.303
ENSMUSG00000035493	Tgfbi	1.897	7.431	2.624
ENSMUSG00000028777	Gnat3	-1.901	7.214	2.028
ENSMUSG00000004951	Hspb1	0.1665	7.899	5.085
ENSMUSG00000032085	Tagln	3.588	7.55	3.628
ENSMUSG00000035783	Acta2	2.647	7.361	3.463
ENSMUSG00000029322	Plac8	1.332	7.142	2.791
ENSMUSG00000026678	Rgs5	1.486	8.054	6.857
ENSMUSG00000009246	Trpm5	-1.985	7.129	2.866
ENSMUSG00000023150	Ivns1abp	4.655	7.862	6.222
ENSMUSG00000026879	Gsn	3.123	7.584	5.031
ENSMUSG00000060063	Alox5ap	-2.024	6.993	2.538
ENSMUSG00000052631	Sh2d6	-2.766	6.972	2.64
ENSMUSG00000024659	Anxa1	5.14	7.625	5.47
ENSMUSG00000090877	Hspa1b	5.375	7.773	6.227
ENSMUSG00000030954	Gp2	-0.9259	7.168	3.813
ENSMUSG00000001119	Col6a1	5.127	7.452	3.427
ENSMUSG00000020052	Ascl1	3.089	7.786	6.654
ENSMUSG00000025498	Irf7	4.439	7.265	3.526
ENSMUSG00000017493	Igfbp4	2.973	7.186	4.183
ENSMUSG00000044177	Wfikkn2	4.501	7.189	4.313
ENSMUSG00000026547	Tagln2	4.771	7.542	6.206
ENSMUSG00000020676	Ccl11	-1.418	6.88	3.674
ENSMUSG00000020241	Col6a2	3.298	6.739	2.431
ENSMUSG00000051079	Rgs13	-2.745	6.408	1.883
ENSMUSG00000074199	Krtdap	0.4641	7.203	5.357
ENSMUSG00000020788	Atp2a3	2.116	7.179	5.265
ENSMUSG00000063011	Msln	-0.1402	7.37	6.191
ENSMUSG00000028262	Clca2	-2.114	7.051	5.141
ENSMUSG00000029761	Cald1	3.107	6.788	4.034
ENSMUSG00000004864	Mapk13	2.239	7.096	5.49
ENSMUSG00000027797	Dclk1	0.8642	6.266	2.005
ENSMUSG00000028195	Cyr61	5.792	7.121	4.189
ENSMUSG00000091971	Hspa1a	4.425	6.969	5.39
ENSMUSG00000021596	Mctp1	-1.617	6.484	3.298
ENSMUSG00000023439	Gnb3	-0.2211	6.527	3.647
ENSMUSG00000022505	Emp2	2.441	6.471	3.526
ENSMUSG00000052974	Cyp2f2	-1.78	6.075	1.833
ENSMUSG00000034634	Ly6d	3.409	6.89	5.41
ENSMUSG00000021701	Plk2	2.498	6.213	2.439
ENSMUSG00000025739	Gng13	-3.103	6.657	4.418
ENSMUSG00000003283	Hck	-2.636	5.822	0.925
ENSMUSG00000024190	Dusp1	5.152	6.943	5.797
ENSMUSG00000040061	Plcb2	-0.5873	6.176	2.665
ENSMUSG00000020644	Id2	1.977	6.303	3.271
ENSMUSG00000020911	Krt19	-0.4834	6.112	2.491
ENSMUSG00000030413	Pglyrp1	0.4059	6.712	5.114
ENSMUSG00000006205	Htra1	2.099	6.575	4.619
ENSMUSG00000038530	Rgs4	1.774	6.319	3.536
ENSMUSG00000038521	C1s	2.683	6.109	1.049
ENSMUSG00000026989	Dapl1	0.232	6.701	5.293
ENSMUSG00000025701	Alox5	-2.124	6.174	3.056
ENSMUSG00000068220	Lgals1	5.589	6.738	4.669
ENSMUSG00000031636	Pdlim3	2.307	6.274	3.617
ENSMUSG00000031377	Bmx	-2.537	5.909	2.093
ENSMUSG00000046460	Sh2d7	-3.122	5.827	1.802
ENSMUSG00000042745	Id1	2.559	5.991	1.617
ENSMUSG00000027602	Map1lc3a	4.474	6.596	5.422
ENSMUSG00000040479	Dgkz	4.117	6.32	4.523
ENSMUSG00000057092	Fxyd3	4.182	6.219	3.658
ENSMUSG00000054005	Mill1	-1.844	5.433	0.8081
ENSMUSG00000026479	Lamc2	4.972	6.375	4.85
ENSMUSG00000020901	Pik3r5	0.5352	5.809	2.549
ENSMUSG00000067377	Tspan6	3.131	5.93	1.418
ENSMUSG00000027514	Zbp1	4.456	6.237	4.589
ENSMUSG00000039202	Abhd2	4.06	6.396	5.364
ENSMUSG00000075590	Nrbp2	4.223	6.124	2.792
ENSMUSG00000048776	Pthlh	1.57	5.686	2.344
ENSMUSG00000019761	Krt10	1.657	6.092	4.221
ENSMUSG00000066705	Fxyd6	0.7036	5.498	1.675
ENSMUSG00000034116	Vav1	1.986	5.701	2.623
ENSMUSG00000037033	Clca4	-3.024	6.107	4.499
ENSMUSG00000000739	Sult5a1	1.129	5.495	1.963
ENSMUSG00000017723	Wfdc2	4.721	6.201	5.034
ENSMUSG00000007872	Id3	3.356	5.802	2.978
ENSMUSG00000044156	Hepacam2	-2.858	5.367	1.48
ENSMUSG00000020108	Ddit4	4.37	6.191	5.067
ENSMUSG00000031880	Rrad	3.491	6.003	4.359
ENSMUSG00000064246	Chi3l1	-0.6619	5.992	4.326
ENSMUSG00000012350	Ehf	-0.3627	6.183	5.178
ENSMUSG00000028699	Tspan1	-1.733	5.787	3.503
ENSMUSG00000029370	Rassf6	3.752	6.138	5.098
ENSMUSG00000024501	Dpysl3	3.956	5.951	4.334
ENSMUSG00000052212	Cd177	-4.386	5.528	2.539
ENSMUSG00000026126	Ptpn18	0.4749	5.642	3.082
ENSMUSG00000039910	Cited2	3.163	5.857	4.022
ENSMUSG00000005873	Reep5	5.047	6.089	4.858
ENSMUSG00000024187	Itfg3	3.652	5.891	4.249
ENSMUSG00000052957	Gas1	3.131	5.629	0.6726
ENSMUSG00000051397	Tacstd2	-0.4804	5.9	4.33
ENSMUSG00000067818	Myl9	3.731	5.754	0.6112
ENSMUSG00000026360	Rgs2	2.075	5.481	2.585
ENSMUSG00000032092	Mpzl2	2.141	5.351	2.119
ENSMUSG00000022358	Fbxo32	3.775	5.726	3.398
ENSMUSG00000050370	Ch25h	1.437	5.161	1.365
ENSMUSG00000037060	Prkcdbp	3.057	5.521	2.87
ENSMUSG00000026166	Ccl20	-0.9902	5.873	4.6
ENSMUSG00000020573	Pik3cg	-0.2516	4.952	0.6954
ENSMUSG00000022148	Fyb	2.862	5.514	3.177
ENSMUSG00000021508	Cxcl14	-3.018	4.803	0.133
ENSMUSG00000019734	Tmc4	4.831	5.888	4.866
ENSMUSG00000071858	Gm94	-1.885	5.438	2.926
ENSMUSG00000027864	Ptgfrn	4.13	5.709	3.337
ENSMUSG00000041681	Iapp	-0.6732	5.287	2.364
ENSMUSG00000056116	H2-T22	3.662	5.763	4.485
ENSMUSG00000037942	Crp	-1.958	5.386	2.92
ENSMUSG00000020592	Sdc1	3.887	5.808	4.748
ENSMUSG00000033355	Rtp4	4.58	5.761	1.131
ENSMUSG00000028943	Espn	2.028	5.766	4.617
ENSMUSG00000025743	Sdc3	3.177	5.431	2.244
ENSMUSG00000022883	Robo1	3.465	5.653	4.162
ENSMUSG00000033722	BC034090	2.445	5.286	2.769
ENSMUSG00000036027	1810046K07Rik	-3.075	5.343	3.023
ENSMUSG00000042675	Ypel3	3.877	5.56	3.971
ENSMUSG00000041889	Shisa4	3.053	5.328	3.007
ENSMUSG00000023886	Smoc2	1.906	5.038	0.96
ENSMUSG00000047250	Ptgs1	-1.642	5.057	2.083
ENSMUSG00000040033	Stat2	4.31	5.56	3.386
ENSMUSG00000045414	1190002N15Rik	3.064	5.268	2.574
ENSMUSG00000022103	Gfra2	-1.204	5.354	3.451
ENSMUSG00000059182	Skap2	4.363	5.56	3.716
ENSMUSG00000021823	Vcl	4.605	5.608	4.216
ENSMUSG00000034107	Ano7	-3.915	4.536	0.04192
ENSMUSG00000002489	Tiam1	4.526	5.567	4.262
ENSMUSG00000038459	Fam108c	3.24	5.54	4.413
ENSMUSG00000041608	Entpd3	-3.536	4.555	0.2671
ENSMUSG00000020057	Dram1	4.145	5.445	3.428
ENSMUSG00000020009	Ifngr1	4.47	5.517	3.885
ENSMUSG00000034684	Sema3f	2.314	5.47	4.267
ENSMUSG00000034161	Scx	-0.3602	4.72	1.031
ENSMUSG00000034127	Tspan8	-2.193	5.11	2.769
ENSMUSG00000000731	Aire	0.5271	4.599	0.5711
ENSMUSG00000024503	Spink3	-1.13	5.306	3.74
ENSMUSG00000031808	Slc27a1	4.077	5.383	3.79
ENSMUSG00000045871	Slitrk6	-4.23	4.438	-0.6721
ENSMUSG00000003032	Klf4	2.69	5.411	4.208
ENSMUSG00000031980	Agt	-3.445	4.403	-0.2062
ENSMUSG00000023236	Scg5	0.302	5.385	4.25
ENSMUSG00000043857	Mgat5b	1.349	4.865	2.046
ENSMUSG00000003746	Man1a	3.349	5.23	3.628
ENSMUSG00000024063	Lbh	2.142	5.392	4.344
ENSMUSG00000032015	Pou2f3	3.375	5.156	3.261
ENSMUSG00000014846	Tppp3	3.132	5.255	3.851
ENSMUSG00000020773	Trim47	2.575	5.208	3.672
ENSMUSG00000027483	Bpifa1	2.146	5.26	3.897
ENSMUSG00000089704	Galnt2	4.312	5.349	4.288
ENSMUSG00000054793	Cadm4	0.2051	4.684	1.478
ENSMUSG00000032068	1600029D21Rik	-0.7042	4.826	2.098
ENSMUSG00000027932	Slc27a3	4.036	5.253	1.589
ENSMUSG00000025165	Sectm1a	0.6269	4.824	2.244
ENSMUSG00000064254	Ethe1	3.021	4.985	2.481
ENSMUSG00000049281	Scn3b	2.435	4.839	0.04015
ENSMUSG00000037071	Scd1	0.9662	5.247	4.213
ENSMUSG00000021765	Fst	-0.9774	4.28	0.1129
ENSMUSG00000053310	Nrgn	-2.906	4.23	-1.124
ENSMUSG00000030530	Furin	4.101	5.179	3.915
ENSMUSG00000068245	D14Ertd668e	3.115	4.945	0.9288
ENSMUSG00000072812	Ahnak2	1.326	4.773	2.399
ENSMUSG00000074207	Adh1	-2.289	4.689	2.037
ENSMUSG00000043252	Tmem64	3.442	5.002	2.161
ENSMUSG00000022865	Cxadr	0.4021	4.799	2.564
ENSMUSG00000021194	Chga	0.7784	5.015	3.508
ENSMUSG00000092609	Gm20481	2.431	5.148	4.12
ENSMUSG00000019102	Aldh3a1	-0.6603	4.41	0.9375
ENSMUSG00000035896	Rnase1	-2.275	4.6	1.773
ENSMUSG00000037949	Ano10	2.738	4.811	2.384
ENSMUSG00000020377	Ltc4s	-3.079	4.862	3.015
ENSMUSG00000030287	Itpr2	2.134	4.765	2.615
ENSMUSG00000017830	Dhx58	3.487	5.02	3.728
ENSMUSG00000056025	Clca1	-1.58	4.691	2.331
ENSMUSG00000028255	Clca3	-3.337	4.645	2.181
ENSMUSG00000017978	Cadps2	2.631	4.915	3.366
ENSMUSG00000031389	Arhgap4	2.347	4.932	3.474
ENSMUSG00000025366	Esyt1	3.457	4.97	3.65
ENSMUSG00000075702	Selm	-0.6865	5.026	3.917
ENSMUSG00000019970	Sgk1	0.2985	4.763	2.808
ENSMUSG00000030782	Tgfb1i1	3.343	4.886	0.6821
ENSMUSG00000021097	Clmn	2.069	4.686	2.5
ENSMUSG00000030653	Pde2a	-2.124	4.53	1.838
ENSMUSG00000024529	Lox	-0.243	4.097	-0.8941
ENSMUSG00000067541	A630073D07Rik	-5.498	4.146	0.2328
ENSMUSG00000032690	Oas2	-2.425	4.088	-2.437
ENSMUSG00000032661	Oas3	1.193	4.455	1.673
ENSMUSG00000038871	Bpgm	3.61	4.901	3.224
ENSMUSG00000052776	Oas1a	3.166	4.795	2.885
ENSMUSG00000027737	Slc7a11	0.2906	4.708	2.807
ENSMUSG00000032698	Lmo2	-3.943	4.129	0.3208
ENSMUSG00000034330	Plcg2	2.796	4.838	3.409
ENSMUSG00000074886	Grk6	3.842	4.918	3.648
ENSMUSG00000041737	Tmem45b	-2.764	4.536	2.199
ENSMUSG00000068747	Sort1	3.657	4.867	3.546
ENSMUSG00000004633	Chn2	-1.394	4.204	0.8267
ENSMUSG00000064210	Ano6	3.852	4.886	3.703
ENSMUSG00000021118	Plek2	1.324	4.566	2.475
ENSMUSG00000025068	Gsto1	0.9315	4.337	1.488
ENSMUSG00000026535	Ifi202b	3.477	4.796	1.685
ENSMUSG00000021458	2010111I01Rik	2.902	4.82	3.583
ENSMUSG00000022489	Pde1b	2.007	4.704	3.1
ENSMUSG00000033420	Antxr1	3.546	4.798	1.163
ENSMUSG00000027204	Fbn1	2.359	4.522	1.614
ENSMUSG00000040488	Ltbp4	0.1371	4.32	1.592
ENSMUSG00000031391	L1cam	-2.019	4.462	2.249
ENSMUSG00000039304	Tnfsf10	-0.3138	4.351	1.807
ENSMUSG00000037362	Nov	-3.863	3.93	-0.8083
ENSMUSG00000057193	Slc44a2	2.963	4.605	1.815
ENSMUSG00000039116	Gpr126	-0.6684	4.45	2.3
ENSMUSG00000024064	Galnt14	0.2409	3.968	-0.5166
ENSMUSG00000072620	Slfn2	2.328	4.604	3.026
ENSMUSG00000059077	Pth	1.082	4.151	-1.146
ENSMUSG00000056258	Kcnq3	-0.7884	4.476	2.55
ENSMUSG00000016024	Lbp	-2.401	4.094	0.903
ENSMUSG00000021830	Txndc16	2.827	4.52	1.567
ENSMUSG00000021495	Fam193b	3.714	4.719	3.596
ENSMUSG00000031785	Gpr56	1.658	4.336	2.073
ENSMUSG00000067594	Krt77	-1.119	4.703	3.663
ENSMUSG00000018927	Ccl6	-2.792	4.204	1.522
ENSMUSG00000020407	Upp1	-2.053	4.143	1.334
ENSMUSG00000037140	Tas2r108	-4.061	3.832	-0.8205
ENSMUSG00000017756	Slc12a7	3.598	4.663	3.294
ENSMUSG00000068735	Trp53i11	2.652	4.645	3.521
ENSMUSG00000031883	Car7	-3.03	4.061	1.033
ENSMUSG00000029510	Gpc2	2.568	4.411	1.511
ENSMUSG00000063903	Klk1	-2.817	4.448	2.744
ENSMUSG00000054404	Slfn5	1.891	4.243	-0.2161
ENSMUSG00000041261	Car8	-3.127	4.019	0.9325
ENSMUSG00000073489	Ifi204	1.151	4.068	0.8869
ENSMUSG00000052981	Ube2ql1	0.6046	4.511	3.075
ENSMUSG00000034923	Ly6g6f	-5.597	3.785	-0.5788
ENSMUSG00000027350	Chgb	-2.781	3.776	-0.5801
ENSMUSG00000042808	Gpx2	-2.39	3.809	0.1548
ENSMUSG00000040770	Il25	-3.103	3.818	0.1989
ENSMUSG00000031972	Acta1	-2.16	3.771	-0.4588
ENSMUSG00000025491	Ifitm1	-0.2868	4.091	1.391
ENSMUSG00000052516	Robo2	0.0443	4.221	1.956
ENSMUSG00000038365	Fbxo25	3.41	4.564	3.453
ENSMUSG00000072662	Gm5887	0.9539	3.957	0.5262
ENSMUSG00000032496	Ltf	-1.757	3.729	-1.022
ENSMUSG00000021536	Adcy2	-4.448	3.727	-0.5218
ENSMUSG00000028128	F3	2.466	4.296	-1.493
ENSMUSG00000058349	Tas2r117	-5.685	3.725	-1.247
ENSMUSG00000064177	Ghrl	-1.431	3.724	-0.3252
ENSMUSG00000061751	Kalrn	3.168	4.526	3.495
ENSMUSG00000073599	Ecscr	2.049	4.213	2.146
ENSMUSG00000027562	Car2	-2.847	3.728	0.05515
ENSMUSG00000024304	Cdh2	1.422	4.419	3.072
ENSMUSG00000046834	Krt1	-2.358	4.028	1.385
ENSMUSG00000034463	Scara3	-0.1723	3.956	1.086
ENSMUSG00000079018	Ly6c1	-0.9316	3.999	1.288
ENSMUSG00000034918	Cdhr2	-3.829	4.012	1.394
ENSMUSG00000067889	Spnb3	-2.355	3.776	0.3871
ENSMUSG00000004791	Pgf	-2.489	3.962	1.207
ENSMUSG00000030796	Tead2	1.066	4.006	1.422
ENSMUSG00000015970	Chdh	0.7824	4.283	2.635
ENSMUSG00000032572	Col6a4	-1.75	4.108	1.897
ENSMUSG00000049154	Fam183b	-3.454	3.744	0.3256
ENSMUSG00000005148	Klf5	0.7255	4.123	2.002
ENSMUSG00000030921	Trim30a	2.61	4.323	2.891
ENSMUSG00000040533	Matn1	-6.407	4.324	2.917
ENSMUSG00000040564	Apoc1	2.262	4.237	2.545
ENSMUSG00000015745	Plekho1	2.276	4.175	1.812
ENSMUSG00000041439	Mfsd6	1.805	4.406	3.295
ENSMUSG00000027276	Jag1	2.143	4.353	3.075
ENSMUSG00000000120	Ngfr	2.442	4.204	1.334
ENSMUSG00000022512	Cldn1	1.845	4.335	3.012
ENSMUSG00000091758	Rgs21	-4.35	3.63	-2.074
ENSMUSG00000015966	Il17rb	0.2535	4.081	1.983
ENSMUSG00000019122	Ccl9	-1.854	4.154	2.303
ENSMUSG00000061816	Myl1	-0.3904	3.857	1.025
ENSMUSG00000008855	Hdac5	1.469	4.16	2.34
ENSMUSG00000053819	Camk2d	3.008	4.309	2.335
ENSMUSG00000004933	Matk	-0.8796	3.941	1.435
ENSMUSG00000049685	Cyp2g1	-2.929	4.38	3.349
ENSMUSG00000022754	Tmem45a	0.1416	4.356	3.256
ENSMUSG00000037098	Rab11fip3	3.225	4.344	3.226
ENSMUSG00000034168	6430527G18Rik	3.083	4.307	1.723
ENSMUSG00000053158	Fes	1.596	4.15	2.593
ENSMUSG00000038242	Aox4	1.93	3.997	1.28
ENSMUSG00000058153	Sez6l	0.9747	3.768	0.8472
ENSMUSG00000023992	Trem2	-5.623	3.54	-0.1912
ENSMUSG00000068259	Olfr461	-1.879	3.534	-0.3792
ENSMUSG00000055978	Fut2	-2.816	4.175	2.789
ENSMUSG00000041729	Coro2b	-0.6262	3.693	0.7447
ENSMUSG00000038665	Dgki	-3.844	3.517	-0.05751
ENSMUSG00000015243	Abca1	0.9687	3.882	1.58
ENSMUSG00000035441	Myo1d	2.999	4.203	2.472
ENSMUSG00000020061	Mybpc1	-2.694	4.18	2.969
ENSMUSG00000038112	AW551984	-1.586	3.49	-0.2402
ENSMUSG00000045319	5430407P10Rik	1.715	3.964	2.072
ENSMUSG00000071633	Gm4952	-7.202	3.482	-0.9796
ENSMUSG00000041012	Cmtm8	1.776	4.186	3.071
ENSMUSG00000051379	Flrt3	3.015	4.172	1.869
ENSMUSG00000021702	Thbs4	-1.02	3.467	-1.538
ENSMUSG00000037960	1110007C09Rik	3.004	4.148	2.34
ENSMUSG00000004366	Sst	-2.127	3.446	-2.903
ENSMUSG00000030713	Klk7	-2.739	3.927	2.086
ENSMUSG00000046546	Fam43a	2.149	4.097	2.905
ENSMUSG00000046523	Kctd4	2.208	3.93	1.139
ENSMUSG00000006777	Krt23	-1.741	4.044	2.741
ENSMUSG00000010047	Hyal2	2.963	4.08	2.846
ENSMUSG00000029188	Slc34a2	-1.761	4.071	3.009
ENSMUSG00000043681	Fam25c	-1.584	3.963	2.58
ENSMUSG00000024697	Gna14	0.6196	3.5	0.2238
ENSMUSG00000041757	Plekha6	-2.767	3.747	1.692
ENSMUSG00000020227	Irak3	0.7821	3.533	0.05208
ENSMUSG00000023905	Tnfrsf12a	1.234	3.626	1.273
ENSMUSG00000025790	Slco3a1	1.397	3.769	1.916
ENSMUSG00000030774	Pak1	0.7971	3.81	2.123
ENSMUSG00000037621	Atoh8	0.4503	3.741	1.838
ENSMUSG00000030739	Myh14	1.064	3.949	2.758
ENSMUSG00000029311	Hsd17b11	1.897	3.892	2.567
ENSMUSG00000033730	Egr3	-2.102	3.803	2.208
ENSMUSG00000063651	Cnfn	-2.482	3.854	2.499
ENSMUSG00000029675	Eln	2.78	3.899	0.8908
ENSMUSG00000057454	Lypd3	-1.641	3.806	2.386
ENSMUSG00000023224	Serping1	1.395	3.742	2.154
ENSMUSG00000034607	Pof1b	-3.004	3.489	1.086
ENSMUSG00000024653	Scgb1a1	-1.455	3.767	2.288
ENSMUSG00000005686	Ampd3	1.667	3.647	1.821
ENSMUSG00000010307	Tmem86a	0.9991	3.663	1.892
ENSMUSG00000056028	Ovol3	-3.8	3.421	0.8633
ENSMUSG00000009545	Kcnq1	-3.294	3.784	2.464
ENSMUSG00000037868	Egr2	2.222	3.728	2.183
ENSMUSG00000037921	Ddx60	2.179	3.701	-1.505
ENSMUSG00000039713	Plekhg5	0.5935	3.71	2.245
ENSMUSG00000029798	Herc6	2.371	3.74	2.424
ENSMUSG00000000248	Clec2g	1.446	3.679	2.167
ENSMUSG00000022952	Runx1	1.658	3.56	0.8388
ENSMUSG00000030125	Lrrc23	-0.2357	3.818	2.779
ENSMUSG00000029605	Oas1b	1.625	3.545	1.305
ENSMUSG00000026459	Myog	-3.987	3.728	2.431
ENSMUSG00000047115	D330028D13Rik	-0.1241	3.802	2.756
ENSMUSG00000008136	Fhl2	0.6873	3.322	-0.9048
ENSMUSG00000039542	Ncam1	-1.847	3.523	1.589
ENSMUSG00000031458	2410022L05Rik	2.147	3.651	2.165
ENSMUSG00000028716	Pdzk1ip1	-2.474	3.775	2.725
ENSMUSG00000074102	Rbm15b	2.356	3.687	1.86
ENSMUSG00000032491	Nradd	-0.1986	3.455	1.373
ENSMUSG00000021123	Rdh12	1.899	3.673	2.32
ENSMUSG00000020027	Socs2	-1.062	3.537	1.745
ENSMUSG00000062901	Klhl24	2.685	3.749	2.553
ENSMUSG00000020828	Pld2	1.607	3.572	2.013
ENSMUSG00000021733	Slc4a7	1.402	3.537	1.973
ENSMUSG00000047747	Rnf150	1.99	3.551	2.044
ENSMUSG00000066885	Ptprv	-1.856	3.423	1.528
ENSMUSG00000033857	Engase	1.119	3.497	1.92
ENSMUSG00000032036	Kirrel3	2.215	3.563	0.5091
ENSMUSG00000078202	Nrarp	2.126	3.577	2.289
ENSMUSG00000039007	Pgcp	1.859	3.645	2.585
ENSMUSG00000056124	B4galt6	-2.161	3.45	1.779
ENSMUSG00000022595	Lypd2	-1.422	3.339	1.325
ENSMUSG00000034675	Dbn1	2.27	3.555	0.4942
ENSMUSG00000051375	Pcdh1	-1.95	3.494	2.049
ENSMUSG00000064264	Zfp428	2.532	3.603	2.012
ENSMUSG00000034226	Rhov	0.7424	3.559	2.345
ENSMUSG00000025867	Cplx2	2.438	3.58	1.487
ENSMUSG00000040471	Ggt6	0.7759	3.325	1.339
ENSMUSG00000022091	Sorbs3	1.812	3.432	0.8691
ENSMUSG00000025212	Sfxn3	2.283	3.518	2.162
ENSMUSG00000019769	Syne1	2.149	3.466	2.116
ENSMUSG00000035208	Slfn8	1.766	3.367	0.05237
ENSMUSG00000074445	Sprr2a3	1.218	3.366	1.806
ENSMUSG00000028883	Sema3a	1.763	3.405	1.989
ENSMUSG00000016529	Il10	-4.302	3.446	2.188
ENSMUSG00000036667	Fam115a	2.395	3.489	2.386
ENSMUSG00000055172	C1ra	1.844	3.361	-1.465
ENSMUSG00000031129	Slc9a9	2.396	3.473	2.336
ENSMUSG00000056978	Hamp2	-4.212	3.451	2.346
ENSMUSG00000037703	Prosapip1	1.751	3.388	2.194

## Sheet: Aire_negative_mature_mTEC
gene_id	gene_name	cTEC FPKM (log2)	immature mTEC FPKM (log2)	AIRE negative mature mTEC FPKM (log2)
ENSMUSG00000073421	H2-Ab1	10.67	10.31	12.36
ENSMUSG00000060586	H2-Eb1	9.722	9.831	11.67
ENSMUSG00000038085	4921517L17Rik	6.233	7.411	10.96
ENSMUSG00000029580	Actb	9.751	10.18	11.23
ENSMUSG00000035186	Ubd	4.72	7.872	10.57
ENSMUSG00000020077	Srgn	3.621	7.456	10.37
ENSMUSG00000063157	Csn2	1.111	4.909	9.759
ENSMUSG00000000682	Cd52	2.431	3.749	9.292
ENSMUSG00000027360	Hdc	-0.09013	3.669	9.242
ENSMUSG00000042306	S100a14	6.439	6.397	9.681
ENSMUSG00000091747	D17H6S56E-5	7.396	7.137	9.892
ENSMUSG00000067341	H2-Eb2	3.717	4.145	8.966
ENSMUSG00000021025	Nfkbia	7.577	7.525	9.674
ENSMUSG00000028581	Laptm5	3.82	6.419	9.391
ENSMUSG00000062515	Fabp4	4.625	5.999	9.255
ENSMUSG00000029581	Fscn1	3.868	5.087	8.996
ENSMUSG00000020383	Il13	-1.955	0.1448	7.787
ENSMUSG00000028617	Lrrc42	6.672	6.968	9.361
ENSMUSG00000026864	Hspa5	7.916	7.711	9.58
ENSMUSG00000020048	Hsp90b1	7.795	8.441	9.678
ENSMUSG00000030827	Fgf21	1.631	5.217	8.82
ENSMUSG00000030666	Calcb	-0.6678	3.962	8.529
ENSMUSG00000023064	Sncg	-0.7739	4.271	8.517
ENSMUSG00000015950	Ncf1	-0.3059	3.001	8.197
ENSMUSG00000024158	Hagh	5.963	6.616	9.008
ENSMUSG00000003814	Calr	8.05	8.268	9.342
ENSMUSG00000006519	Cyba	2.413	5.795	8.748
ENSMUSG00000021957	Tkt	4.919	4.98	8.537
ENSMUSG00000074457	S100a16	7.472	7.122	9.025
ENSMUSG00000040808	S100g	-0.3275	3.195	7.979
ENSMUSG00000032487	Ptgs2	-0.0785	3.853	8.1
ENSMUSG00000000732	Icosl	0.8023	5.111	8.377
ENSMUSG00000032359	Ctsh	0.2082	5.093	8.329
ENSMUSG00000021680	Crhbp	-1.755	1.931	7.597
ENSMUSG00000020063	Sirt1	3.142	3.51	7.872
ENSMUSG00000024334	H2-Oa	5.281	5.239	8.219
ENSMUSG00000020826	Nos2	-1.247	2.052	7.449
ENSMUSG00000027215	Cd82	6.326	7.656	8.736
ENSMUSG00000037405	Icam1	7.097	6.679	8.57
ENSMUSG00000079037	Prnp	6.195	6.765	8.409
ENSMUSG00000031765	Mt1	5.337	5.882	8.191
ENSMUSG00000041782	Lad1	3.304	4.328	7.821
ENSMUSG00000034359	Skint2	-0.7747	5.746	8.142
ENSMUSG00000041515	Irf8	6.957	4.989	8.399
ENSMUSG00000021242	Npc2	5.478	6.364	8.237
ENSMUSG00000048277	Syngr2	5.205	6.877	8.345
ENSMUSG00000021998	Lcp1	3.979	6.664	8.262
ENSMUSG00000029772	Ahcyl2	3.793	6.082	8.11
ENSMUSG00000074141	Il4i1	1.254	6.342	8.162
ENSMUSG00000037548	H2-DMb2	5.913	5.927	8.026
ENSMUSG00000016256	Ctsz	2.583	5.584	7.942
ENSMUSG00000031304	Il2rg	2.806	3.253	7.373
ENSMUSG00000030750	Nsmce1	5.233	4.848	7.829
ENSMUSG00000031207	Msn	3.893	6.134	8.032
ENSMUSG00000024619	Cdx1	-1.206	4.251	7.577
ENSMUSG00000022265	Ank	-0.9086	5.475	7.836
ENSMUSG00000050708	Ftl1	6.608	6.214	8.09
ENSMUSG00000049091	Sephs2	3.469	4.539	7.61
ENSMUSG00000020830	Vmo1	-1.368	1.536	6.898
ENSMUSG00000020400	Tnip1	5.639	6.198	7.97
ENSMUSG00000031762	Mt2	5.155	6.296	7.977
ENSMUSG00000069516	Lyz2	0.3439	4.128	7.473
ENSMUSG00000029797	Sspo	-1.052	3.502	7.313
ENSMUSG00000025225	Nfkb2	6.219	6.371	7.953
ENSMUSG00000028392	Bspry	3.001	5.225	7.676
ENSMUSG00000030538	Cib1	5.988	7.016	8.054
ENSMUSG00000038642	Ctss	1.662	5.052	7.556
ENSMUSG00000028843	Sh3bgrl3	5.978	6.321	7.847
ENSMUSG00000022540	Rogdi	2.835	4.355	7.392
ENSMUSG00000013643	2210415F13Rik	-0.9683	4.223	7.347
ENSMUSG00000024247	Pkdcc	5.567	6.005	7.759
ENSMUSG00000068154	Insm1	-1.946	3.79	7.246
ENSMUSG00000026981	Il1rn	-0.537	4.744	7.467
ENSMUSG00000006457	Actn3	6.052	5.57	7.746
ENSMUSG00000024772	Ehd1	4.677	4.987	7.497
ENSMUSG00000089773	Skint1	0.884	6.269	7.793
ENSMUSG00000042082	Arsb	3.393	4.219	7.302
ENSMUSG00000001020	S100a4	2.255	3.094	7.036
ENSMUSG00000029560	Snx8	1.595	3.476	7.115
ENSMUSG00000053398	Phgdh	6.806	5.606	7.869
ENSMUSG00000026621	Mosc1	-2.077	1.178	6.557
ENSMUSG00000054162	Spock3	0.8089	3.195	7.012
ENSMUSG00000004837	Grap	1.084	2.254	6.784
ENSMUSG00000027073	Prg2	-1.64	2.468	6.811
ENSMUSG00000047751	Utf1	0.05062	3.619	7.073
ENSMUSG00000030232	Aebp2	6.048	5.043	7.62
ENSMUSG00000031838	Ifi30	6.69	6.082	7.765
ENSMUSG00000021743	Fezf2	-0.8964	6.167	7.624
ENSMUSG00000059456	Ptk2b	0.7573	4.124	7.138
ENSMUSG00000017652	Cd40	4.838	4.833	7.302
ENSMUSG00000032554	Trf	-1.907	1.287	6.477
ENSMUSG00000025473	Adam8	0.211	5.302	7.397
ENSMUSG00000022838	Eaf2	4.49	4.043	7.192
ENSMUSG00000004040	Stat3	5.78	6.601	7.68
ENSMUSG00000021054	Sgpp1	5.269	6.268	7.59
ENSMUSG00000023272	Creld2	4.612	4.404	7.203
ENSMUSG00000020734	Grin2c	-0.6902	1.245	6.419
ENSMUSG00000002983	Relb	5.513	5.786	7.468
ENSMUSG00000041132	N4bp2l1	3.382	3.47	6.93
ENSMUSG00000032786	Alas1	5.023	4.585	7.29
ENSMUSG00000047501	Cldn4	0.8032	5.243	7.34
ENSMUSG00000021125	Arg2	-0.0614	1.587	6.489
ENSMUSG00000027776	Il12a	-2.994	-0.04179	6.118
ENSMUSG00000071669	Snx29	4.07	3.371	7.055
ENSMUSG00000029811	Abp1	-1.891	3.751	6.981
ENSMUSG00000034785	Dio1	1.948	5.858	7.467
ENSMUSG00000001025	S100a6	2.292	6.488	7.609
ENSMUSG00000006782	Cnp	3.761	4.805	7.218
ENSMUSG00000033066	Gas7	3.377	4.678	7.187
ENSMUSG00000022237	Ankrd33b	3.701	3.46	6.94
ENSMUSG00000026670	Uap1	4.434	4.386	7.106
ENSMUSG00000041538	H2-Ob	-0.4193	2.289	6.608
ENSMUSG00000002847	Pla1a	-1.213	0.9895	6.301
ENSMUSG00000038482	Tfdp1	5.725	5.146	7.373
ENSMUSG00000032000	Birc3	5.517	5.56	7.312
ENSMUSG00000032575	Manf	5.813	5.927	7.392
ENSMUSG00000046352	Gjb2	-0.3407	4.463	7.049
ENSMUSG00000024867	Pip5k1b	-0.04909	3.647	6.85
ENSMUSG00000046516	Cox17	5.439	5.756	7.337
ENSMUSG00000025383	Il23a	-1.085	3.79	6.874
ENSMUSG00000052026	Slc6a7	-2.543	3.812	6.873
ENSMUSG00000037242	Clic4	5.082	5.79	7.325
ENSMUSG00000062991	Nrg1	0.1411	1.353	6.293
ENSMUSG00000075122	Cd80	-0.9691	2.597	6.576
ENSMUSG00000063172	Hspb11	4.951	4.905	7.12
ENSMUSG00000034981	Parm1	4.808	6.326	7.436
ENSMUSG00000023805	Synj2	4.672	4.369	7.053
ENSMUSG00000059991	Nptx2	-1.81	1.102	6.216
ENSMUSG00000031530	Dusp4	0.1432	4.975	7.106
ENSMUSG00000016664	Pacsin2	6.016	4.834	7.337
ENSMUSG00000022026	Olfm4	3.504	4.377	6.941
ENSMUSG00000041351	Rap1gap	0.6845	5.131	7.102
ENSMUSG00000020388	Pdlim4	-0.1751	6.046	7.299
ENSMUSG00000003873	Bax	5.366	5.443	7.159
ENSMUSG00000015312	Gadd45b	3.778	5.013	7.056
ENSMUSG00000038539	Atf5	3.675	4.841	7.008
ENSMUSG00000030647	Ndufc2	5.79	5.632	7.222
ENSMUSG00000025283	Sat1	4.007	5.072	7.052
ENSMUSG00000004113	Cacna1b	-1.089	3.521	6.684
ENSMUSG00000050558	Prokr2	4.891	1.474	6.999
ENSMUSG00000046034	Fam105b	3.693	5.039	7.029
ENSMUSG00000033083	Tbc1d4	0.119	1.787	6.275
ENSMUSG00000014867	Surf4	5.802	6.055	7.255
ENSMUSG00000027695	Pld1	3.971	4.744	6.95
ENSMUSG00000054256	Msi1	2.924	2.728	6.524
ENSMUSG00000037679	Inf2	2.615	3.738	6.711
ENSMUSG00000027669	Gnb4	4.816	4.328	6.96
ENSMUSG00000036053	Fmnl2	4.664	5.226	7.052
ENSMUSG00000030748	Il4ra	5.919	6.035	7.237
ENSMUSG00000033220	Rac2	2.611	4.279	6.824
ENSMUSG00000043068	Fam89a	2.568	3.489	6.632
ENSMUSG00000007659	Bcl2l1	4.141	4.167	6.782
ENSMUSG00000051435	Fhad1	-1.31	2.745	6.445
ENSMUSG00000028793	Rnf19b	3.749	5.389	7.054
ENSMUSG00000023991	Foxp4	5.255	5.392	7.051
ENSMUSG00000023456	Tpi1	6.083	6.219	7.24
ENSMUSG00000042312	S100a13	5.476	5.091	7.068
ENSMUSG00000057069	Ero1lb	2.184	5.884	7.153
ENSMUSG00000091447	Gm17386	5.415	6.199	7.223
ENSMUSG00000031557	Plekha2	5.061	4.588	6.956
ENSMUSG00000040435	Ppp1r15a	4.452	5.132	6.97
ENSMUSG00000042662	Dusp15	0.6103	0.1196	5.92
ENSMUSG00000027247	Arhgap1	4.974	5.422	7.012
ENSMUSG00000075415	Fnbp1	4.441	5.005	6.916
ENSMUSG00000040430	Pitpnc1	2.479	3.785	6.632
ENSMUSG00000034573	Ptpn13	4.704	4.058	6.836
ENSMUSG00000017707	Serinc3	5.956	5.602	7.124
ENSMUSG00000056737	Capg	4.096	5.926	7.114
ENSMUSG00000034926	Dhcr24	3.997	4.166	6.704
ENSMUSG00000025279	Dnase1l3	0.9081	2.257	6.248
ENSMUSG00000001021	S100a3	3.747	3.532	6.59
ENSMUSG00000035864	Syt1	-1.28	4.832	6.839
ENSMUSG00000059586	Nsmce2	4.017	3.812	6.648
ENSMUSG00000063727	Tnfrsf11b	-1.239	3.955	6.63
ENSMUSG00000028792	Ak2	5.659	5.403	7.017
ENSMUSG00000034361	Cpne2	0.4253	3.559	6.526
ENSMUSG00000037406	Htra4	-2.801	0.2987	5.76
ENSMUSG00000042064	Myo3b	-2.84	1.752	6.09
ENSMUSG00000045629	Sh3tc2	-0.1577	3.459	6.478
ENSMUSG00000030911	Zp2	-3.569	2.538	6.241
ENSMUSG00000079547	H2-DMb1	5.396	5.006	6.9
ENSMUSG00000020827	Mink1	4.069	5.197	6.852
ENSMUSG00000061132	Blnk	0.3605	4.792	6.749
ENSMUSG00000050908	Fam18a	0.2679	2.127	6.12
ENSMUSG00000027709	Mccc1	5.456	4.373	6.89
ENSMUSG00000030669	Calca	-0.6914	1.687	6.016
ENSMUSG00000034037	Fgd5	-0.3276	4.514	6.669
ENSMUSG00000025509	Pnpla2	5.339	5.568	6.885
ENSMUSG00000019872	Smpdl3a	4.145	5.528	6.872
ENSMUSG00000040767	Snrnp25	2.769	4.977	6.742
ENSMUSG00000042686	Jph1	4.245	3.059	6.571
ENSMUSG00000031770	Herpud1	3.447	5.582	6.874
ENSMUSG00000035916	Ptprq	-1.672	5.453	6.838
ENSMUSG00000041771	Slc24a4	-1.402	5.034	6.722
ENSMUSG00000034663	Bmp2k	3.82	3.75	6.441
ENSMUSG00000071715	Ncf4	-1.54	2.968	6.234
ENSMUSG00000079738	Snx29	3.817	3.11	6.43
ENSMUSG00000023032	Slc4a8	-2.376	2.932	6.216
ENSMUSG00000022295	Atp6v1c1	4.016	4.914	6.671
ENSMUSG00000036815	Dpp10	-1.385	1.711	5.928
ENSMUSG00000041164	Zmiz2	3.852	4.98	6.684
ENSMUSG00000024987	Cyp26a1	-3.352	1.032	5.77
ENSMUSG00000042770	Hebp1	5.807	3.404	6.864
ENSMUSG00000062345	Serpinb2	-0.5611	4.343	6.524
ENSMUSG00000008843	Cldn13	-1.546	0.9718	5.743
ENSMUSG00000020132	Rab21	5.805	5.41	6.856
ENSMUSG00000022371	Col14a1	-1.837	1.291	5.803
ENSMUSG00000020444	Guk1	4.13	5.208	6.706
ENSMUSG00000009394	Syn2	-3.411	1.359	5.815
ENSMUSG00000036718	Micall2	3.137	3.722	6.361
ENSMUSG00000022270	Fam134b	4.921	4.27	6.636
ENSMUSG00000049972	Skint9	-2.339	4.212	6.472
ENSMUSG00000022504	Ciita	5.724	4.849	6.813
ENSMUSG00000018819	Lsp1	3.35	2.044	6.26
ENSMUSG00000033538	Casp4	3.476	5.053	6.643
ENSMUSG00000028434	Epb4.1l4b	3.709	5.655	6.766
ENSMUSG00000035900	Gramd4	2.109	3.924	6.363
ENSMUSG00000027710	Acad9	4.81	5.249	6.667
ENSMUSG00000032327	Stra6	-1.094	2.371	5.992
ENSMUSG00000004707	Ly9	-0.2583	-0.6559	5.441
ENSMUSG00000058715	Fcer1g	-1.303	-0.6211	5.436
ENSMUSG00000003235	Eif2b5	4.964	4.464	6.58
ENSMUSG00000033508	Asprv1	-0.1512	5.57	6.717
ENSMUSG00000032418	Me1	4.061	4.292	6.417
ENSMUSG00000000308	Ckmt1	-0.6354	5.478	6.691
ENSMUSG00000001864	Aif1l	0.5391	3.013	6.117
ENSMUSG00000032333	Stoml1	4.545	5.177	6.601
ENSMUSG00000050440	Hamp	-1.286	4.366	6.406
ENSMUSG00000079563	Pglyrp2	0.4716	3.756	6.263
ENSMUSG00000037944	Ccr7	-0.6394	1.251	5.681
ENSMUSG00000059956	Serpinb12	-1.59	1.991	5.851
ENSMUSG00000020023	Tmcc3	3.613	4.018	6.317
ENSMUSG00000000184	Ccnd2	5.422	5.429	6.643
ENSMUSG00000025938	Slco5a1	2.398	2.392	5.939
ENSMUSG00000029470	P2rx4	2.874	3.962	6.3
ENSMUSG00000050965	Prkca	3.655	3.314	6.227
ENSMUSG00000039844	Rapgef1	4.355	4.165	6.383
ENSMUSG00000054871	Tmem158	1.299	4.372	6.386
ENSMUSG00000050994	9130014G24Rik	-2.471	2.291	5.903
ENSMUSG00000038301	Snx10	4.339	4.498	6.408
ENSMUSG00000025888	Casp1	2.687	4.847	6.487
ENSMUSG00000019489	Cd70	-1.423	1.208	5.642
ENSMUSG00000020739	Nup85	5.061	4.875	6.526
ENSMUSG00000028965	Tnfrsf9	-2.046	1.562	5.709
ENSMUSG00000021215	Net1	5.55	5.581	6.619
ENSMUSG00000034341	Wbp2	5.626	5.542	6.626
ENSMUSG00000030759	Far1	4.127	4.466	6.33
ENSMUSG00000032115	Hyou1	5.067	5.312	6.525
ENSMUSG00000055960	Skint4	0.4723	3.705	6.149
ENSMUSG00000001156	Mxd1	1.419	3.935	6.202
ENSMUSG00000023088	Abcc1	3.658	4.947	6.436
ENSMUSG00000004043	Stat5a	2.345	5.553	6.576
ENSMUSG00000024409	Psors1c2	-0.6394	1.745	5.692
ENSMUSG00000066129	Kndc1	2.745	4.273	6.276
ENSMUSG00000069520	Tmem19	3.217	4.21	6.259
ENSMUSG00000058624	Gda	-1.177	3.745	6.147
ENSMUSG00000039735	Fnbp1l	5.343	5.453	6.536
ENSMUSG00000062638	Btnl1	-3.45	0.1853	5.317
ENSMUSG00000029771	Irf5	0.2482	2.782	5.907
ENSMUSG00000026866	Kynu	-2.828	1.478	5.604
ENSMUSG00000076931	Iglc3	-3.328	2.611	5.862
ENSMUSG00000058793	Cds2	4.201	4.086	6.229
ENSMUSG00000003134	Tbc1d8	3.011	4.691	6.332
ENSMUSG00000023947	Nfkbie	5.214	5.157	6.451
ENSMUSG00000019817	Plagl1	2.138	4.4	6.261
ENSMUSG00000062210	Tnfaip8	4.096	5.31	6.469
ENSMUSG00000023353	Agap3	5.26	5.353	6.476
ENSMUSG00000027540	Ptpn1	4.106	5.251	6.45
ENSMUSG00000039316	Rftn1	2.123	2.816	5.874
ENSMUSG00000058690	Gcap14	4.262	5.269	6.439
ENSMUSG00000045827	Serpinb9	3.258	4.277	6.209
ENSMUSG00000020124	Usp15	5.416	4.724	6.471
ENSMUSG00000027074	Slc43a3	2.211	2.904	5.886
ENSMUSG00000018569	Cldn7	-0.6345	5.051	6.382
ENSMUSG00000021357	Exoc2	3.795	4.129	6.162
ENSMUSG00000018919	Tm4sf5	-0.9059	2.289	5.711
ENSMUSG00000079197	Psme2	4.719	5.144	6.372
ENSMUSG00000024798	Htr7	0.04259	4.263	6.163
ENSMUSG00000020485	Supt4h1	5.211	5.385	6.423
ENSMUSG00000026011	Ctla4	-0.22	-1.941	5.169
ENSMUSG00000027356	Fermt1	4.241	3.954	6.149
ENSMUSG00000038508	Gdf15	-3.716	0.934	5.377
ENSMUSG00000033061	Resp18	-1.782	4.64	6.227
ENSMUSG00000039621	Prex1	1.832	1.323	5.57
ENSMUSG00000022370	Mrpl13	4.713	4.23	6.228
ENSMUSG00000024778	Fas	2.404	4.059	6.069
ENSMUSG00000074211	Sdhaf1	3.371	3.999	6.048
ENSMUSG00000037110	Ralgapa2	0.9317	3.046	5.826
ENSMUSG00000022769	Sdf2l1	3.348	3.997	6.042
ENSMUSG00000030199	Etv6	4.616	4.997	6.273
ENSMUSG00000028552	Eps15	5.142	4.988	6.298
ENSMUSG00000038370	Pcp4l1	-2.587	1.928	5.552
ENSMUSG00000075334	Rprm	-2.351	0.595	5.242
ENSMUSG00000043061	Tmem18	2.866	3.612	5.94
ENSMUSG00000031537	Ikbkb	4.546	4.982	6.256
ENSMUSG00000034438	Gbp8	3.161	3.741	5.968
ENSMUSG00000026031	Cflar	4.764	4.665	6.202
ENSMUSG00000057375	Yipf1	3.931	4.938	6.242
ENSMUSG00000056222	Spock1	-1.747	2.106	5.58
ENSMUSG00000042502	Cd2bp2	4.51	5.034	6.257
ENSMUSG00000024997	Prdx3	5.049	4.826	6.254
ENSMUSG00000056220	Pla2g4a	1.18	4.439	6.104
ENSMUSG00000036390	Gadd45a	5.009	4.431	6.228
ENSMUSG00000032470	Mras	4.556	4.26	6.123
ENSMUSG00000074673	Ttll9	-0.7043	0.02482	5.07
ENSMUSG00000004267	Eno2	-0.1326	2.556	5.655
ENSMUSG00000042842	Serpinb6b	2.129	4.346	6.057
ENSMUSG00000030826	Bcat2	4.616	4.203	6.099
ENSMUSG00000020190	Mknk2	4.9	5.222	6.236
ENSMUSG00000027646	Src	4.929	5.232	6.236
ENSMUSG00000035678	Tnfsf9	-0.9629	1.692	5.405
ENSMUSG00000024737	Slc15a3	-2.348	2.386	5.562
ENSMUSG00000020733	Slc9a3r1	4.883	5.124	6.193
ENSMUSG00000038608	Dock10	2.073	3.098	5.714
ENSMUSG00000026321	Tnfrsf11a	-0.03554	4.915	6.132
ENSMUSG00000032080	Apoa4	-0.6451	3.488	5.802
ENSMUSG00000029556	Hnf1a	-0.9505	1.922	5.432
ENSMUSG00000029189	Sel1l3	-2.823	3.73	5.848
ENSMUSG00000020775	Mrpl38	4.936	4.954	6.13
ENSMUSG00000028217	Cdh17	-1.614	2.462	5.552
ENSMUSG00000053641	Dennd4a	2.316	2.592	5.571
ENSMUSG00000026158	Ogfrl1	3.725	4.156	5.933
ENSMUSG00000032382	Snx1	5.047	4.891	6.134
ENSMUSG00000018654	Ikzf1	3.364	3.617	5.801
ENSMUSG00000048281	Dleu7	-2.277	2.168	5.454
ENSMUSG00000029338	Antxr2	2.619	3.379	5.732
ENSMUSG00000050069	Grem2	-1.279	-1.543	4.949
ENSMUSG00000020876	Snx11	3.709	4.361	5.945
ENSMUSG00000001901	Kcnh6	1.638	3.425	5.726
ENSMUSG00000027499	Pkia	2.289	3.515	5.746
ENSMUSG00000036067	Slc2a6	-2.69	1.465	5.27
ENSMUSG00000031432	Prps1	3.207	4.164	5.893
ENSMUSG00000022440	C1qtnf6	1.454	4.843	6.046
ENSMUSG00000023467	Tulp2	2.348	1.827	5.458
ENSMUSG00000020740	Gga3	3.697	3.793	5.787
ENSMUSG00000074892	B3galt5	3.85	2.878	5.799
ENSMUSG00000038034	Igsf8	0.9546	4.015	5.836
ENSMUSG00000029851	Fam115c	4.358	4.932	6.04
ENSMUSG00000037145	2210407C18Rik	-0.82	4.174	5.863
ENSMUSG00000032436	Cmtm7	3.801	4.88	6.026
ENSMUSG00000026875	Traf1	-0.1931	3.642	5.739
ENSMUSG00000034574	Daam1	4.988	4.534	6.048
ENSMUSG00000021929	Kpna3	5.064	4.081	6.064
ENSMUSG00000003348	Mob3a	3.484	4.718	5.981
ENSMUSG00000040613	Apobec1	2.952	4.183	5.857
ENSMUSG00000033470	Cysltr2	3.969	3.708	5.803
ENSMUSG00000038127	Ccdc50	5.03	4.451	6.044
ENSMUSG00000017943	Gdap1l1	-3.412	1.594	5.247
ENSMUSG00000000948	Snrpn	1.943	2.88	5.544
ENSMUSG00000019929	Dcn	3.705	4.594	5.937
ENSMUSG00000018334	Ksr1	3.075	3.84	5.759
ENSMUSG00000005360	Slc1a3	4.424	4.622	5.935
ENSMUSG00000063851	Rnf183	0.4119	3.277	5.623
ENSMUSG00000020838	Slc6a4	-0.6954	4.199	5.835
ENSMUSG00000031488	Rab11fip1	1.763	3.729	5.725
ENSMUSG00000000278	Scpep1	1.538	2.814	5.503
ENSMUSG00000053395	Cacng8	-4.961	-1.668	4.85
ENSMUSG00000027077	Smtnl1	-2.508	0.4951	4.953
ENSMUSG00000063904	Dpp3	4.907	4.938	5.98
ENSMUSG00000052075	1700029F12Rik	-2.811	-1.548	4.836
ENSMUSG00000031635	Anxa10	-3.14	1.487	5.179
ENSMUSG00000030747	Dgat2	1.235	3.516	5.648
ENSMUSG00000037341	Slc9a7	0.9076	3.288	5.582
ENSMUSG00000020017	Hal	-2.404	1.841	5.247
ENSMUSG00000051000	Fam160a1	3.51	3.628	5.645
ENSMUSG00000023122	Sult1c2	-2.406	0.6818	4.96
ENSMUSG00000047898	Ccr4	-1.064	-0.03832	4.791
ENSMUSG00000033039	Micall1	4.019	4.779	5.893
ENSMUSG00000059866	Tnip2	3.096	4.238	5.768
ENSMUSG00000030168	Adipor2	4.259	4.05	5.772
ENSMUSG00000021678	F2rl1	2.4	4.757	5.884
ENSMUSG00000022519	Srl	1.672	3.018	5.475
ENSMUSG00000050234	Gja4	-1.212	4.521	5.815
ENSMUSG00000019775	Rgs17	-1.032	3.147	5.496
ENSMUSG00000030745	Il21r	0.8223	-0.5255	4.952
ENSMUSG00000020120	Plek	-1.424	2.684	5.383
ENSMUSG00000040859	Bsdc1	3.937	4.424	5.782
ENSMUSG00000057246	BC051142	1.725	2.366	5.295
ENSMUSG00000038080	Kdm1b	4.723	4.628	5.838
ENSMUSG00000037126	Psd	4.172	4.034	5.709
ENSMUSG00000020380	Rad50	4.037	3.32	5.671
ENSMUSG00000046410	Kcnk6	0.8853	2.768	5.374
ENSMUSG00000030203	Dusp16	4.346	3.878	5.73
ENSMUSG00000064065	Ipcef1	-1.323	0.9991	4.949
ENSMUSG00000021177	Tdp1	3.184	2.422	5.454
ENSMUSG00000034917	Tjp3	-0.9156	4.082	5.655
ENSMUSG00000024899	Papss2	-0.1497	3.187	5.445
ENSMUSG00000070780	Rbm47	4.491	3.995	5.745
ENSMUSG00000027513	Pck1	-2.682	-0.148	4.702
ENSMUSG00000020300	Cpeb4	3.185	4.465	5.734
ENSMUSG00000019936	Epyc	-3.653	1.185	4.961
ENSMUSG00000040188	Scamp2	4.199	4.779	5.789
ENSMUSG00000031303	Map3k15	-0.9951	2.778	5.322
ENSMUSG00000011256	Adam19	3.135	2.408	5.392
ENSMUSG00000003382	Etv3	4.152	3.785	5.623
ENSMUSG00000045322	Tlr9	-4.046	-0.08288	4.659
ENSMUSG00000049892	Rasd1	-0.1238	3.599	5.488
ENSMUSG00000025145	Lrrc45	4.242	4.325	5.653
ENSMUSG00000089661	Mia1	-3.332	0.3562	4.733
ENSMUSG00000029108	Pcdh7	-0.02838	3.697	5.505
ENSMUSG00000034312	Iqsec1	3.918	4.013	5.576
ENSMUSG00000020962	Gtf2a1	3.325	3.436	5.441
ENSMUSG00000060216	Arrb2	3.403	4.106	5.594
ENSMUSG00000091055	Siglec15	-4.347	-1.431	4.641
ENSMUSG00000043659	Npsr1	0.07388	-0.3543	4.657
ENSMUSG00000021932	Rnaseh2b	3.648	4.255	5.617
ENSMUSG00000046314	Stxbp6	3.971	3.073	5.549
ENSMUSG00000042535	Gtpbp1	3.444	3.933	5.54
ENSMUSG00000021720	Rnf180	3.253	4.276	5.618
ENSMUSG00000025795	Rassf3	3.571	3.592	5.459
ENSMUSG00000026107	Obfc2a	3.482	2.811	5.429
ENSMUSG00000030685	Kctd13	2.918	3.917	5.523
ENSMUSG00000070691	Runx3	-1.446	2.048	5.086
ENSMUSG00000039208	Metrnl	2.857	3.191	5.349
ENSMUSG00000016028	Celsr1	3.992	4.663	5.686
ENSMUSG00000020523	Fam114a2	4.545	4.261	5.652
ENSMUSG00000035042	Ccl5	2.674	3.247	5.35
ENSMUSG00000039031	Arhgap18	1.768	3.108	5.312
ENSMUSG00000033554	Dph5	4.487	2.991	5.631
ENSMUSG00000030465	Psd3	1.322	2.734	5.222
ENSMUSG00000021356	Irf4	-0.8719	2.786	5.233
ENSMUSG00000019866	Aim1	0.1382	4.462	5.62
ENSMUSG00000067049	Unc93a	-3.859	-0.7411	4.582
ENSMUSG00000023973	Cnpy3	3.994	4.304	5.578
ENSMUSG00000022996	Wnt10b	-1.763	3.219	5.327
ENSMUSG00000022479	Vdr	2.246	3.829	5.46
ENSMUSG00000028555	Ttc39a	3.363	2.944	5.35
ENSMUSG00000060477	Irak2	1.913	3.365	5.35
ENSMUSG00000064105	Cnnm2	0.6179	1.908	5.013
ENSMUSG00000027528	Fabp9	-1.339	2.539	5.156
ENSMUSG00000031555	Adam9	4.078	4.149	5.521
ENSMUSG00000008318	Relt	1.012	4.44	5.585
ENSMUSG00000020810	Cygb	1.209	1.063	4.836
ENSMUSG00000024340	Btnl2	-2.898	0.09403	4.578
ENSMUSG00000039349	C130074G19Rik	-1.317	1.52	4.906
ENSMUSG00000050108	Bpifc	-0.4409	1.362	4.861
ENSMUSG00000036646	Man1b1	4.179	4.204	5.516
ENSMUSG00000056708	Ier5	2.518	4.361	5.55
ENSMUSG00000029335	Bmp3	-2.585	2.188	5.046
ENSMUSG00000015133	Lrrk1	3.542	4.162	5.499
ENSMUSG00000033389	Arhgap44	4.388	3.152	5.546
ENSMUSG00000001444	Tbx21	-0.2256	0.4007	4.622
ENSMUSG00000073530	Pappa2	-4.372	-0.3918	4.529
ENSMUSG00000034706	Dnaic2	-1.401	1.645	4.909
ENSMUSG00000074582	Arfgef2	4.253	3.341	5.511
ENSMUSG00000039230	Tbcd	3.716	4.184	5.49
ENSMUSG00000042328	Hps4	2.786	2.79	5.164
ENSMUSG00000020926	Adam11	-1.529	-0.04187	4.517
ENSMUSG00000032872	Cyb5r4	4.149	4.323	5.513
ENSMUSG00000075033	Fam55c	-0.9312	1.25	4.797
ENSMUSG00000025764	Phf17	3.043	3.429	5.3
ENSMUSG00000020062	Slc5a8	-1.397	1.057	4.74
ENSMUSG00000038518	Jarid2	3.864	3.987	5.418
ENSMUSG00000040339	Fam102b	3.235	3.179	5.243
ENSMUSG00000063659	Zfp238	4.162	4.241	5.471
ENSMUSG00000032369	Plscr1	4.298	4.451	5.519
ENSMUSG00000090231	Cfb	-0.342	2.305	5.021
ENSMUSG00000023495	Pcbp4	3.391	4.423	5.505
ENSMUSG00000026942	Traf2	4.128	4.348	5.485
ENSMUSG00000052160	Pld4	-0.8743	-0.2052	4.478
ENSMUSG00000004947	Dtx2	2.691	2.81	5.123
ENSMUSG00000044626	Liph	-2.358	1.946	4.923
ENSMUSG00000063779	Chi3l4	-1.862	2.517	5.051
ENSMUSG00000027361	Gabpb1	4.113	4.051	5.408
ENSMUSG00000028048	Gba	4.034	4.447	5.482
ENSMUSG00000025370	Cdh9	-1.488	-1.032	4.452
ENSMUSG00000045326	Fndc7	-2.289	3.657	5.292
ENSMUSG00000023045	Soat2	0.3399	0.2464	4.513
ENSMUSG00000020782	Llgl2	4.33	4.45	5.46
ENSMUSG00000034135	Sik3	3.742	3.912	5.335
ENSMUSG00000064115	Cadm2	-4.637	0.6484	4.575
ENSMUSG00000020279	Il9r	-2.18	0.9713	4.648
ENSMUSG00000045095	Magi1	2.157	3.266	5.176
ENSMUSG00000037652	Phc3	3.115	3.105	5.139
ENSMUSG00000028836	Slc30a2	-2.46	3.377	5.198
ENSMUSG00000031712	Il15	2.785	2.702	5.059
ENSMUSG00000028528	Dnajc6	3.108	3.6	5.247
ENSMUSG00000028830	AU040320	3.076	3.927	5.321
ENSMUSG00000021953	Tdh	-1.926	3.499	5.221
ENSMUSG00000013539	D16H22S680E	3.896	3.175	5.313
ENSMUSG00000020964	Sel1l	4.276	4.363	5.419
ENSMUSG00000022496	Tnfrsf17	-2.885	-1.643	4.41
ENSMUSG00000054423	Cadps	-1.541	2.702	5.031
ENSMUSG00000050379	Sept6	3.983	4.288	5.398
ENSMUSG00000066152	Slc31a2	2.976	3.671	5.254
ENSMUSG00000029217	Tec	1.95	3.342	5.174
ENSMUSG00000042784	Muc1	-1.641	3.218	5.144
ENSMUSG00000029559	2210016L21Rik	4.41	4.18	5.419
ENSMUSG00000058317	Ube2e2	3.564	3.775	5.266
ENSMUSG00000028064	Sema4a	0.1988	3.871	5.285
ENSMUSG00000038055	Dexi	4.053	3.979	5.327
ENSMUSG00000017167	Cntnap1	0.4627	1.568	4.746
ENSMUSG00000018923	Med11	4.052	4.177	5.349
ENSMUSG00000028799	Zfp362	3.55	4.227	5.36
ENSMUSG00000015340	Cybb	-2.44	1.662	4.766
ENSMUSG00000042010	Acacb	-2.037	3.067	5.091
ENSMUSG00000027188	Pamr1	-2.356	2.946	5.062
ENSMUSG00000025020	Slit1	-4.076	-1.284	4.376
ENSMUSG00000028789	Adc	1.62	2.265	4.898
ENSMUSG00000000374	Trappc10	4.16	4.373	5.375
ENSMUSG00000022367	Has2	-1.998	2.24	4.881
ENSMUSG00000027868	Tbx15	-3.131	0.06592	4.376
ENSMUSG00000004698	Hdac9	-2.899	1.635	4.738
ENSMUSG00000029298	Gbp9	3.936	4.053	5.296
ENSMUSG00000023914	Mep1a	-3.265	2.65	4.971
ENSMUSG00000032502	Stac	-0.777	-0.85	4.353
ENSMUSG00000040016	Ptger3	1.744	2.749	4.986
ENSMUSG00000049940	Pgrmc2	4.129	4.295	5.339
ENSMUSG00000013275	Slc41a1	2.971	3.529	5.16
ENSMUSG00000010453	4632411B12Rik	3.772	3.933	5.251
ENSMUSG00000029598	Plbd2	2.988	3.091	5.055
ENSMUSG00000059588	Calcrl	2.078	3.352	5.115
ENSMUSG00000038390	Gpr162	1.317	1.874	4.764
ENSMUSG00000020297	Nsg2	3.043	0.6272	5.034
ENSMUSG00000030683	Sez6l2	-1.449	2.871	4.99
ENSMUSG00000026077	Npas2	1.115	3.316	5.088
ENSMUSG00000053617	Sh3pxd2a	3.78	3.841	5.208
ENSMUSG00000047897	Ripply2	-3.117	-1.493	4.316
ENSMUSG00000000730	Dnmt3l	-3.135	-0.6815	4.315
ENSMUSG00000027338	Prnd	0.8694	0.5946	4.515
ENSMUSG00000079363	Gbp4	2.778	1.78	4.95
ENSMUSG00000038580	Sct	-3.413	2.344	4.849
ENSMUSG00000035513	Ntng2	-3.945	2.814	4.954
ENSMUSG00000021895	Arhgef3	1.346	3.316	5.07
ENSMUSG00000026442	Nfasc	-1.79	2.589	4.901
ENSMUSG00000040899	Ccr6	-2.873	-1.768	4.302
ENSMUSG00000030588	Yif1b	3.946	4.204	5.269
ENSMUSG00000042918	Mamstr	-0.1018	2.543	4.883
ENSMUSG00000022629	Kif21a	3.86	3.117	5.184
ENSMUSG00000068335	Dok1	3.616	3.058	5.127
ENSMUSG00000004347	Pde1c	0.5161	3.52	5.102
ENSMUSG00000019832	Rab32	1.128	4.112	5.239
ENSMUSG00000033065	Pfkm	3.381	2.761	5.069
ENSMUSG00000000385	Tmprss2	2.289	2.544	4.875
ENSMUSG00000022436	Sh3bp1	3.82	4.086	5.217
ENSMUSG00000030365	Clec2i	-0.4137	0.1416	4.298
ENSMUSG00000027530	Fabp12	-2.869	-0.683	4.265
ENSMUSG00000031877	Ces2g	0.003098	3.418	5.055
ENSMUSG00000022074	Tnfrsf10b	3.67	3.251	5.111
ENSMUSG00000025915	Sgk3	3.599	3.263	5.091
ENSMUSG00000027164	Traf6	3.356	3.198	5.034
ENSMUSG00000024805	Pcgf5	2.107	3.671	5.107
ENSMUSG00000073858	Itpripl2	1.608	2.7	4.881
ENSMUSG00000068329	Htra2	4.08	4.027	5.195
ENSMUSG00000030519	Apba2	4.212	1.125	5.221
ENSMUSG00000035686	Thrsp	1.512	2.013	4.708
ENSMUSG00000060600	Eno3	2.967	3.014	4.94
ENSMUSG00000034040	Wbscr17	-0.2984	4.03	5.173
ENSMUSG00000041607	Mbp	1.543	3.359	5.017
ENSMUSG00000026893	Gca	0.7841	2.826	4.893
ENSMUSG00000052593	Adam17	3.942	3.955	5.152
ENSMUSG00000073792	Alg6	4.172	3.508	5.201
ENSMUSG00000038354	Ankrd35	1.633	3.47	5.032
ENSMUSG00000062127	Cttnbp2nl	3.959	4.005	5.154
ENSMUSG00000057969	Sema3b	-2.16	2.499	4.804
ENSMUSG00000037443	Ccdc21	2.004	2.426	4.788
ENSMUSG00000054136	Adm2	-3.213	2.846	4.88
ENSMUSG00000049556	Lingo1	0.7678	2.607	4.824
ENSMUSG00000005534	Insr	3.041	3.34	4.991
ENSMUSG00000054720	Lrrc8c	3.726	3.153	5.08
ENSMUSG00000031605	Klhl2	2.654	2.712	4.84
ENSMUSG00000037482	Erv3	-3.764	-0.1773	4.212
ENSMUSG00000036764	Dnajc12	2.494	3.27	4.963
ENSMUSG00000020340	Cyfip2	2.165	2.375	4.753
ENSMUSG00000058022	9530008L14Rik	-1.526	1.585	4.57
ENSMUSG00000032087	Dscaml1	-2.663	3.31	4.969
ENSMUSG00000037820	Tgm2	0.9733	2.623	4.806
ENSMUSG00000034714	Ttyh2	2.984	3.507	5.008
ENSMUSG00000070285	BY080835	-0.6265	2.733	4.829
ENSMUSG00000005774	Rfx5	4.012	3.707	5.124
ENSMUSG00000032740	Ccdc88a	3.062	2.876	4.899
ENSMUSG00000030909	Anks4b	-3.412	2.037	4.657
ENSMUSG00000031250	Tnmd	-2.561	0.1491	4.215
ENSMUSG00000030806	Stx1b	-0.651	0.2896	4.246
ENSMUSG00000031822	Gse1	3.423	3.859	5.072
ENSMUSG00000000486	Sept1	3.968	3.073	5.097
ENSMUSG00000004319	Clcn3	2.769	3.775	5.052
ENSMUSG00000042532	Golga7b	-3.103	1.869	4.61
ENSMUSG00000045625	Pigz	1.362	1.062	4.493
ENSMUSG00000042129	Rassf4	-2.629	1.769	4.586
ENSMUSG00000034613	Ppm1h	3.574	3.511	5.001
ENSMUSG00000030825	Hsd17b14	-1.727	1.011	4.406
ENSMUSG00000070564	Ntn5	-2.282	1.233	4.456
ENSMUSG00000025964	Adam23	-0.8159	1.477	4.512
ENSMUSG00000002992	Apoc2	-1.083	1.268	4.463
ENSMUSG00000003228	Grk5	4.088	4.083	5.114
ENSMUSG00000037369	Kdm6a	3.531	3.986	5.084
ENSMUSG00000070407	Hs3st3b1	0.7645	3.282	4.917
ENSMUSG00000038276	Accn3	-3.209	-1.605	4.154
ENSMUSG00000044186	Nkx2-6	-3.355	-0.5838	4.154
ENSMUSG00000026414	Tnnt2	0.6243	2.88	4.819
ENSMUSG00000092572	Serpinb10-ps	0.7754	0.5631	4.33
ENSMUSG00000054555	Adam12	-0.3535	0.5158	4.266
ENSMUSG00000079722	Ttll2	-4.138	-0.4542	4.145
ENSMUSG00000027510	Rbm38	2.719	4.035	5.074
ENSMUSG00000020577	Tspan13	1.484	3.531	4.957
ENSMUSG00000035594	Chrna5	-3.019	-0.805	4.137
ENSMUSG00000026630	Batf3	-3.621	-1.571	4.134
ENSMUSG00000027072	Prg3	-4.666	-1.467	4.133
ENSMUSG00000023169	Slc38a1	1.363	3.296	4.893
ENSMUSG00000058019	Ces5a	-3.642	0.7994	4.315
ENSMUSG00000047454	Gphn	3.72	3.716	4.99
ENSMUSG00000055862	Izumo4	1.646	4.042	5.063
ENSMUSG00000021754	Map3k1	2.392	2.726	4.757
ENSMUSG00000070056	Mfhas1	3.133	3.2	4.859
ENSMUSG00000039270	Megf9	3.096	3.315	4.883
ENSMUSG00000062312	Erbb2	1.864	3.693	4.968
ENSMUSG00000045594	Glb1	3.704	3.752	4.976
ENSMUSG00000040782	Rfwd2	4.01	3.92	5.03
ENSMUSG00000034959	5031414D18Rik	1.552	-0.9613	4.461
ENSMUSG00000061517	Sox21	-3.936	1.587	4.468
ENSMUSG00000054716	Zfp771	3.851	3.416	4.991
ENSMUSG00000038179	Slamf7	-3.271	-0.7166	4.094
ENSMUSG00000024401	Tnf	-1.929	0.6505	4.242
ENSMUSG00000023000	Dhh	-2.525	-0.8873	4.09
ENSMUSG00000039191	Rbpj	2.964	3.525	4.904
ENSMUSG00000028100	Nudt17	3.136	2.382	4.814
ENSMUSG00000044017	Gpr133	-2.692	1.985	4.545
ENSMUSG00000020713	Gh	-1.602	-0.4809	4.084
ENSMUSG00000041298	Katnal1	2.037	2.19	4.591
ENSMUSG00000001157	Gmcl1	3.599	3.683	4.934
ENSMUSG00000027244	Atg13	3.442	3.822	4.959
ENSMUSG00000032306	Mpi	2.672	3.696	4.921
ENSMUSG00000030472	Ceacam18	-3.957	-0.8542	4.065
ENSMUSG00000036639	Nudt1	3.811	3.622	4.944
ENSMUSG00000056423	Uts2d	-6.146	-0.04656	4.058
ENSMUSG00000019944	Rhobtb1	1.217	2.765	4.686
ENSMUSG00000027257	Pacsin3	3.175	3.59	4.872
ENSMUSG00000003452	Bicd1	2.818	2.246	4.693
ENSMUSG00000047810	Ccdc88b	0.8384	2.81	4.689
ENSMUSG00000054277	Arfgap3	2.484	3.35	4.81
ENSMUSG00000023277	Twf2	3.586	3.849	4.925
ENSMUSG00000061825	Ces2c	-3.856	0.2126	4.083
ENSMUSG00000028391	Wdr31	1.855	2.225	4.548
ENSMUSG00000020718	Polg2	3.895	3.217	4.93
ENSMUSG00000037447	Arid5a	2.704	3.674	4.877
ENSMUSG00000031149	Praf2	3.437	3.638	4.86
ENSMUSG00000035775	Krt20	-2.894	3.327	4.787
ENSMUSG00000021298	Gpr132	1.587	0.5599	4.382
ENSMUSG00000090766	Gm17684	3.127	2.882	4.737
ENSMUSG00000033416	1110038D17Rik	3.346	3.582	4.84
ENSMUSG00000027544	Nfatc2	0.06578	2.752	4.647
ENSMUSG00000024210	Ip6k3	-5.344	-1.273	4.006
ENSMUSG00000039611	2810432L12Rik	1.866	2.198	4.509
ENSMUSG00000028893	Sesn2	3.572	2.546	4.826
ENSMUSG00000029047	Pex10	3.206	1.878	4.741
ENSMUSG00000022066	Entpd4	2.247	2.911	4.672
ENSMUSG00000027071	P2rx3	-1.951	-0.5695	3.995
ENSMUSG00000003206	Ebi3	-1.331	1.623	4.363
ENSMUSG00000029475	Kdm2b	3.533	3.286	4.795
ENSMUSG00000020919	Stat5b	3.243	2.978	4.727
ENSMUSG00000002043	Trappc6a	3.739	3.71	4.842
ENSMUSG00000020053	Igf1	-1.431	2.659	4.588
ENSMUSG00000032253	Phip	3.581	3.843	4.861
ENSMUSG00000058427	Cxcl2	-1.217	2.413	4.526
ENSMUSG00000040412	5330417C22Rik	-3.109	3.409	4.756
ENSMUSG00000014852	Adamts13	-4.251	0.4988	4.072
ENSMUSG00000015942	Gtf2ird2	1.847	1.97	4.411
ENSMUSG00000044060	A830010M20Rik	2.105	2.863	4.615
ENSMUSG00000056413	Adap1	-2.252	1.679	4.341
ENSMUSG00000020431	Adcy1	0.07968	-0.7012	3.97
ENSMUSG00000021224	Numb	3.554	3.737	4.814
ENSMUSG00000027605	Acss2	2.092	2.207	4.457
ENSMUSG00000022586	Ly6i	-3.108	1.089	4.195
ENSMUSG00000050737	Ptges	-0.6029	3.676	4.793
ENSMUSG00000073859	Itpripl2	2.566	3.417	4.722
ENSMUSG00000037989	Wnk2	1.464	3.672	4.773
ENSMUSG00000028158	Mttp	-0.1841	1.164	4.189
ENSMUSG00000002459	Rgs20	-2.089	1.53	4.273
ENSMUSG00000042377	Fam83g	2.336	3.498	4.728
ENSMUSG00000024471	Myot	-7.468	-2.075	3.915
ENSMUSG00000002565	Scin	2.567	3.614	4.75
ENSMUSG00000054509	Parp4	3.137	3.689	4.762
ENSMUSG00000011382	Dhdh	1.683	2.103	4.394
ENSMUSG00000020640	Itsn2	3.627	3.545	4.743
ENSMUSG00000036931	Nfkbid	1.967	2.111	4.39
ENSMUSG00000040943	Tet2	2.744	2.316	4.536
ENSMUSG00000012126	Ubxn11	0.07275	1.808	4.317
ENSMUSG00000028300	3110043O21Rik	2.869	3.535	4.71
ENSMUSG00000026668	Ucma	-1.364	1.879	4.326
ENSMUSG00000040136	Abcc8	-2.232	1.723	4.287
ENSMUSG00000068011	2510049J12Rik	-3.791	2.936	4.562
ENSMUSG00000040723	Rcsd1	3.358	1.844	4.66
ENSMUSG00000064224	Gsdma3	-0.8522	-0.2691	3.882
ENSMUSG00000078945	Naip2	-2.835	1.044	4.12
ENSMUSG00000035778	Ggta1	3.342	2.991	4.651
ENSMUSG00000022901	Cd86	-2.26	-1.334	3.877
ENSMUSG00000034738	Nostrin	-1.929	2.544	4.465
ENSMUSG00000025467	Prap1	-1.836	2.354	4.421
ENSMUSG00000049897	Gm711	-2.994	-1.139	3.876
ENSMUSG00000036814	Slc6a20a	-2.976	1.833	4.299
ENSMUSG00000061928	Dsg1b	-3.714	1.843	4.299
ENSMUSG00000052477	C130026I21Rik	0.0499	1.839	4.295
ENSMUSG00000040829	Zmynd15	1.871	3.327	4.638
ENSMUSG00000043003	Rasef	3.381	3.425	4.659
ENSMUSG00000046598	Bdh1	1.011	2.786	4.504
ENSMUSG00000066595	Mfsd7b	2.387	2.903	4.527
ENSMUSG00000016498	Pdcd1lg2	0.3309	3.462	4.645
ENSMUSG00000001763	Tspan33	-2.529	-0.2639	3.843
ENSMUSG00000056054	S100a8	0.4217	2.951	4.524
ENSMUSG00000029557	Ftsj2	1.974	1.785	4.297
ENSMUSG00000028494	Plin2	3.32	3.444	4.635
ENSMUSG00000015709	Arnt2	1.412	3.647	4.682
ENSMUSG00000054920	Klhl5	3.122	3.624	4.676
ENSMUSG00000021636	Marveld2	-0.9991	2.89	4.506
ENSMUSG00000032081	Apoc3	-2.939	1.541	4.193
ENSMUSG00000029075	Tnfrsf4	-1.864	0.1224	3.863
ENSMUSG00000028607	Cpt2	3.162	3.169	4.568
ENSMUSG00000038264	Sema7a	0.3458	2.107	4.32
ENSMUSG00000028088	Fmo5	2.758	2.271	4.467
ENSMUSG00000025064	Col17a1	0.1942	3.131	4.553
ENSMUSG00000006362	Cbfa2t3	1.774	3.5	4.636
ENSMUSG00000047696	Ccdc144b	-0.3851	-0.03413	3.82
ENSMUSG00000029401	Rilpl2	3.327	3.317	4.584
ENSMUSG00000060131	Atp8b4	-2.574	0.5572	3.94
ENSMUSG00000024235	Map3k8	2.777	2.342	4.452
ENSMUSG00000022876	Samsn1	-0.7733	-0.2685	3.804
ENSMUSG00000040557	Wbscr27	1.197	3.213	4.539
ENSMUSG00000025495	Ptdss2	2.866	3.048	4.5
ENSMUSG00000059149	Mfsd4	3.521	2.977	4.608
ENSMUSG00000024897	Apba1	2.053	1.184	4.259
ENSMUSG00000058346	Ces5a	-2.433	0.3958	3.876
ENSMUSG00000021457	Syk	0.7391	3.189	4.519
ENSMUSG00000044674	Fzd1	1.586	2.247	4.291
ENSMUSG00000025037	Maoa	1.913	1.528	4.212
ENSMUSG00000074342	I830077J02Rik	-4.315	-3.493	3.756
ENSMUSG00000033688	1300017J02Rik	-1.264	0.824	3.945
ENSMUSG00000030259	Rassf8	3.197	2.755	4.493
ENSMUSG00000078439	2210404O07Rik	0.2467	3.506	4.564
ENSMUSG00000001986	Gria3	2.636	1.611	4.345
ENSMUSG00000036273	Lrrk2	0.9063	-0.2088	3.938
ENSMUSG00000021638	Ocln	1.811	2.854	4.389
ENSMUSG00000029875	AI836003	-4.086	-0.04974	3.727
ENSMUSG00000058435	Btnl4	-3.167	1.359	4.041
ENSMUSG00000025927	Tfap2b	-3.231	0.531	3.845
ENSMUSG00000053719	Klk1b26	-3.227	0.8453	3.917
ENSMUSG00000041347	Bdkrb1	-1.407	1.422	4.046
ENSMUSG00000031271	Serpina7	-2.032	2.526	4.295
ENSMUSG00000019737	AI428936	2.394	3.513	4.522
ENSMUSG00000049252	Lrp1b	-2.469	-0.0662	3.708
ENSMUSG00000040413	Timd2	-3.798	-1.118	3.707
ENSMUSG00000040046	Tph1	1.375	-0.686	4.02
ENSMUSG00000040701	Ap1g2	1.132	3.1	4.415
ENSMUSG00000036206	Sh3bp4	3.164	2.685	4.425
ENSMUSG00000032089	Il10ra	-2.211	-0.1682	3.692
ENSMUSG00000054203	Ifi205	-2.406	-0.5271	3.686
ENSMUSG00000045092	S1pr1	2.102	1.01	4.168
ENSMUSG00000026433	Rab7l1	0.8682	2.346	4.224
ENSMUSG00000031137	Fgf13	1.648	2.121	4.172
ENSMUSG00000033107	Rnf125	1.427	2.15	4.177
ENSMUSG00000079418	Atg4a	2.254	3.212	4.422
ENSMUSG00000002910	Arrdc2	1.659	2.971	4.366
ENSMUSG00000026525	Opn3	0.5349	0.7918	3.854
ENSMUSG00000029134	Plb1	-2.018	3.04	4.372
ENSMUSG00000078762	Haus5	2.575	3.052	4.374
ENSMUSG00000037716	Ccdc33	-4.248	1.464	3.999
ENSMUSG00000020872	Tac4	-3.235	-1.897	3.66
ENSMUSG00000068663	Clec16a	2.836	2.977	4.348
ENSMUSG00000050106	Tmc8	0.7715	0.9815	3.885
ENSMUSG00000044485	Klk1b11	-3.676	-0.3236	3.655
ENSMUSG00000021831	Ero1l	3.323	3.011	4.424
ENSMUSG00000049624	Slc17a5	0.5225	2.285	4.183
ENSMUSG00000031959	Wdr59	3.127	3.064	4.377
ENSMUSG00000040732	Erg	-2.318	-1.439	3.653
ENSMUSG00000042349	Ikbke	1.213	3.093	4.367
ENSMUSG00000033863	Klf9	2.852	3.287	4.411
ENSMUSG00000047030	Spata2	2.899	2.889	4.32
ENSMUSG00000044279	Crb3	-1.265	3.096	4.359
ENSMUSG00000034839	Larp6	0.4235	1.711	4.031
ENSMUSG00000048440	Cyp4f16	1.611	2.875	4.294
ENSMUSG00000029848	Stra8	-2.378	-1.256	3.603
ENSMUSG00000045248	Med26	2.425	2.215	4.162
ENSMUSG00000056888	Glipr1	1.902	1.592	4.04
ENSMUSG00000033450	Tagap	-2.427	-1.34	3.599
ENSMUSG00000031791	Tmem38a	1.302	3.178	4.335
ENSMUSG00000018001	Cyth3	3.365	3.042	4.373
ENSMUSG00000071470	Ccnb1ip1	-4.758	-5.197	3.593
ENSMUSG00000074676	Foxs1	-0.06823	1.075	3.842
ENSMUSG00000032053	Pou2af1	-2.618	2.752	4.227
ENSMUSG00000020953	Coch	-2.24	-1.03	3.589
ENSMUSG00000018774	Cd68	0.4461	1.655	3.964
ENSMUSG00000025270	Alas2	-2.571	-1.036	3.579
ENSMUSG00000058400	Qrfpr	-1.385	-0.04624	3.579
ENSMUSG00000079174	Gm3054	-1.635	3.06	4.284
ENSMUSG00000032489	Kif9	1.116	1.798	3.992
ENSMUSG00000018740	Slc25a35	1.265	3.279	4.331
ENSMUSG00000050511	Oprd1	-3.943	-0.5046	3.57
ENSMUSG00000027999	Pla2g12a	2.254	2.18	4.089
ENSMUSG00000024885	Aldh3b1	0.4713	2.243	4.081
ENSMUSG00000079659	4930420K17Rik	1.603	3.097	4.278
ENSMUSG00000022755	Gpr128	-3.281	2.473	4.133
ENSMUSG00000032198	Dock6	1.966	2.035	4.031
ENSMUSG00000020310	Madcam1	-3.163	-0.9454	3.56
ENSMUSG00000030124	Lag3	0.09607	0.0006923	3.582
ENSMUSG00000052949	Rnf157	2.268	0.9627	4.065
ENSMUSG00000000628	Hk2	1.499	0.541	3.887
ENSMUSG00000040363	Bcor	3.142	2.077	4.263
ENSMUSG00000026715	Serpinc1	-1.306	0.04935	3.534
ENSMUSG00000079013	Serpina3j	-2.946	3.064	4.23
ENSMUSG00000006445	Epha2	-2.24	1.528	3.867
ENSMUSG00000031608	Galnt7	2.033	2.493	4.08
ENSMUSG00000058260	Serpina9	-3.358	1.016	3.735
ENSMUSG00000064090	Vrk2	3.05	3.222	4.239
ENSMUSG00000026167	Wnt10a	-2.382	3.002	4.183
ENSMUSG00000067001	Serpinb7	-1.872	2.049	3.96
ENSMUSG00000031779	Ccl22	0.2616	1.763	3.889
ENSMUSG00000038663	Fsd2	-2.228	-0.6575	3.478
ENSMUSG00000026536	Mnda	-1.812	3.062	4.184
ENSMUSG00000012609	Ttll5	2.856	2.938	4.154
ENSMUSG00000061808	Ttr	-3.567	0.4527	3.576
ENSMUSG00000041556	Fbxo2	-1.318	2.72	4.1
ENSMUSG00000028551	Cdkn2c	2.328	2.606	4.071
ENSMUSG00000074934	Grem1	-2.524	1.183	3.741
ENSMUSG00000047661	1600012P17Rik	-4.764	-2.754	3.464
ENSMUSG00000020744	Slc25a19	2.825	2.982	4.153
ENSMUSG00000006517	Mvd	1.698	1.789	3.874
ENSMUSG00000032175	Tyk2	2.922	2.973	4.147
ENSMUSG00000025269	Apex2	2.727	2.577	4.089
ENSMUSG00000022987	Zfp641	0.1251	0.8186	3.646
ENSMUSG00000067261	Foxd3	-7.653	-0.1819	3.455
ENSMUSG00000044534	Ccbp2	-5.443	-3.538	3.452
ENSMUSG00000057363	Uxs1	2.473	2.746	4.086
ENSMUSG00000006463	Zdhhc24	2.749	2.407	4.084
ENSMUSG00000040010	Slc7a5	0.8771	2.445	4.013
ENSMUSG00000075151	Olfr1136	-6.486	-5.066	3.445
ENSMUSG00000033491	Prss35	-0.3516	0.001889	3.445
ENSMUSG00000027583	Zbtb46	-0.1933	2.351	3.988
ENSMUSG00000027221	Chst1	-2.409	-0.2502	3.443
ENSMUSG00000079033	Mef2b	-2.439	0.9702	3.661
ENSMUSG00000037188	Grhl3	-2.141	1.843	3.86
ENSMUSG00000063935	Zar1	-0.01349	0.1005	3.457
ENSMUSG00000017405	Nek8	1.831	1.697	3.857
ENSMUSG00000042115	Klhdc8a	2.917	1.467	4.102
ENSMUSG00000040146	Rgl3	1.955	2.726	4.058
ENSMUSG00000054517	Trim65	2.097	3.044	4.13
ENSMUSG00000070313	A630095E13Rik	-3.472	-0.5204	3.423
ENSMUSG00000000869	Il4	-3.993	-2.68	3.422
ENSMUSG00000074006	Omp	-3.231	0.781	3.598
ENSMUSG00000050926	Dcaf12l2	-0.7039	-1.083	3.408
ENSMUSG00000037847	BC016495	0.5262	2.174	3.911
ENSMUSG00000000531	Grasp	1.166	3.013	4.093
ENSMUSG00000041923	Nol4	2.48	3.102	4.112
ENSMUSG00000092009	Myh15	-4.872	-1.74	3.393
ENSMUSG00000058216	BC021614	-2.111	2.734	4.024
ENSMUSG00000059187	Fam19a1	-2.15	0.4038	3.484
ENSMUSG00000044468	Fam46c	-1.261	0.6923	3.549
ENSMUSG00000032462	Pik3cb	0.4483	2.136	3.881
ENSMUSG00000036912	Piwil4	-0.4471	1.801	3.802
ENSMUSG00000026380	Tfcp2l1	1.171	2.315	3.918
ENSMUSG00000020143	Dock2	1.104	0.6858	3.636
ENSMUSG00000044788	Fads6	-1.139	2.683	3.999
ENSMUSG00000021884	Hacl1	2.244	2.346	3.915
ENSMUSG00000027401	Tgm3	-2.084	0.7335	3.537
ENSMUSG00000032715	Trib3	1.586	-0.1688	3.733
ENSMUSG00000021009	Ptpn21	2.596	2.256	3.963
ENSMUSG00000044562	Rasip1	0.3459	2.35	3.904
ENSMUSG00000024399	Ltb	0.7169	2.988	4.049
ENSMUSG00000009621	Vav2	2.281	2.868	4.017
ENSMUSG00000044005	Gls2	-2.259	-0.272	3.351
ENSMUSG00000032232	Cgnl1	1.837	3.033	4.052
ENSMUSG00000055725	Paqr3	1.966	2.063	3.82
ENSMUSG00000020100	Slc29a3	2.646	2.691	3.965
ENSMUSG00000026170	Cyp27a1	-0.8913	1.723	3.737
ENSMUSG00000022040	Ephx2	2.438	1.906	3.899
ENSMUSG00000026824	Kcnj3	-4.5	-0.5772	3.332
ENSMUSG00000022602	Arc	-0.883	2.668	3.948
ENSMUSG00000043243	Fam129c	-0.1674	2.842	3.988
ENSMUSG00000079484	Phyhd1	-0.871	0.7085	3.494
ENSMUSG00000070520	Ndnl2	1.711	2.015	3.796
ENSMUSG00000031842	Pde4c	-3.107	-1.136	3.323
ENSMUSG00000014547	Wdfy2	2.385	2.677	3.933
ENSMUSG00000078657	Crnn	-2.35	1.569	3.674
ENSMUSG00000018169	Mfng	-0.4034	2.571	3.901
ENSMUSG00000020387	Phf15	2.311	2.117	3.836
ENSMUSG00000002771	Grin2d	-2.004	0.4518	3.406
ENSMUSG00000024036	Slc37a1	-1.396	2.803	3.949
ENSMUSG00000036022	Fam122b	2.299	2.103	3.818
ENSMUSG00000034786	Gpsm3	1.862	2.616	3.872
ENSMUSG00000052062	Pard3b	1.973	1.987	3.717
ENSMUSG00000030137	Tuba8	-2.933	0.9196	3.459
ENSMUSG00000028435	Aqp3	1.825	2.884	3.903
ENSMUSG00000039578	Fam190a	2.338	2.423	3.796
ENSMUSG00000021044	Adck1	2.22	2.607	3.837
ENSMUSG00000036377	C530008M17Rik	-3.5	1.427	3.56
ENSMUSG00000000791	Il12rb1	0.5226	0.8381	3.423
ENSMUSG00000022494	Shisa9	-1.324	0.7755	3.405
ENSMUSG00000030556	Lrrc28	2.184	1.86	3.731
ENSMUSG00000037860	Aim2	0.3413	2.171	3.725
ENSMUSG00000036103	Colec12	-0.7465	2.02	3.686
ENSMUSG00000025545	Clybl	2.273	2.625	3.826
ENSMUSG00000028578	5830433M19Rik	2.537	2.368	3.798
ENSMUSG00000031286	Glt28d2	1.753	1.9	3.645
ENSMUSG00000049562	Gm962	2.442	1.681	3.765
ENSMUSG00000073016	Uprt	2.445	2.18	3.75
ENSMUSG00000018906	P4ha2	0.9409	2.469	3.749
ENSMUSG00000048865	Arhgap30	1.534	-0.466	3.53
ENSMUSG00000031886	Ces2e	-3.122	0.7029	3.335
ENSMUSG00000029344	Tpst2	2.733	2.583	3.798
ENSMUSG00000023949	Tcte1	0.4105	1.596	3.533
ENSMUSG00000025969	Nrp2	-2.141	1.893	3.598
ENSMUSG00000024371	C2	-0.9061	2.753	3.796
ENSMUSG00000091387	Gcnt4	-1.003	1.611	3.531
ENSMUSG00000031155	Pim2	0.3329	1.902	3.596
ENSMUSG00000034066	Farp2	1.912	1.408	3.597
ENSMUSG00000038843	Gcnt1	-2.643	1.477	3.492
ENSMUSG00000044098	Rsbn1	2.732	2.632	3.781
ENSMUSG00000017688	Hnf4g	-0.5386	1.403	3.469
ENSMUSG00000031901	Dus2l	2.148	2.301	3.676
ENSMUSG00000078584	AU022252	2.043	1.417	3.608
ENSMUSG00000032024	9030425E11Rik	-2.088	1.803	3.548
ENSMUSG00000038517	Tbkbp1	-0.9135	1.057	3.375
ENSMUSG00000091166	Tstd1	-1.47	2.538	3.716
ENSMUSG00000042851	Zc3h6	1.62	1.794	3.543
ENSMUSG00000031428	Zcchc18	-2.993	1.435	3.459
ENSMUSG00000040658	BC048355	2.126	1.366	3.607
ENSMUSG00000042473	Tbc1d8b	2.744	2.673	3.745
ENSMUSG00000055334	Snupn	2.578	2.675	3.724
ENSMUSG00000036769	Wdr44	2.711	2.332	3.732
ENSMUSG00000053166	Cdh22	-4.404	2.61	3.707
ENSMUSG00000024378	Stard4	1.42	2.453	3.666
ENSMUSG00000038732	Mboat1	-0.4453	2.629	3.703
ENSMUSG00000074240	Cib3	-4.236	2.05	3.567
ENSMUSG00000038022	Fam188b	2.253	1.632	3.611
ENSMUSG00000022960	Donson	1.556	2.593	3.686
ENSMUSG00000020889	Nr1d1	1.13	2.612	3.689
ENSMUSG00000036062	N28178	-3.35	1.372	3.4
ENSMUSG00000039747	Orai2	0.1411	1.816	3.501
ENSMUSG00000002083	Bbc3	2.481	2.316	3.655
ENSMUSG00000026616	Cr2	-3.533	2.552	3.671
ENSMUSG00000037754	Ppp1r16b	2.665	0.1789	3.694
ENSMUSG00000078185	Chml	1.93	1.619	3.521
ENSMUSG00000057766	Ankrd29	1.339	1.087	3.379
ENSMUSG00000043004	Gng2	0.1993	1.31	3.366
ENSMUSG00000056091	St3gal5	1.154	1.662	3.445
ENSMUSG00000047878	A4galt	-3.369	1.477	3.4
ENSMUSG00000024109	Nrxn1	-1.914	1.558	3.417
ENSMUSG00000034320	Slc26a2	1.813	1.736	3.474
ENSMUSG00000071648	Rom1	1.618	2.082	3.533
ENSMUSG00000040265	Dnm3	1.564	1.84	3.476
ENSMUSG00000021314	Amph	-1.904	2.252	3.566
ENSMUSG00000030276	Ttll3	-0.4896	1.461	3.38
ENSMUSG00000032028	Fam55b	-4.592	1.363	3.355
ENSMUSG00000056752	Dnahc9	2.341	1.658	3.578
ENSMUSG00000030830	Itgal	1.873	1.946	3.484
ENSMUSG00000021213	Akr1c13	-1.03	2.421	3.592
ENSMUSG00000034891	Sncb	-4.255	2.228	3.547
ENSMUSG00000026870	D730039F16Rik	-1.189	2.388	3.568
ENSMUSG00000034579	Pla2g3	-1.372	1.534	3.37
ENSMUSG00000041974	2310008H04Rik	2.235	2.384	3.526
ENSMUSG00000028885	Smpdl3b	-1.327	1.591	3.342
ENSMUSG00000010311	Optc	-1.718	2.017	3.44
ENSMUSG00000029596	Sdsl	1.821	-1.695	3.359
ENSMUSG00000021070	Bdkrb2	1.422	2.388	3.488
ENSMUSG00000030284	Creld1	-0.2926	2.003	3.398
ENSMUSG00000090035	Galnt4	1.614	2.118	3.42
ENSMUSG00000075404	Ciita	1.877	1.678	3.363
ENSMUSG00000020469	Myl7	-2.018	2.054	3.391
ENSMUSG00000031539	Ap3m2	1.687	2.45	3.46
ENSMUSG00000037348	Paqr7	2.454	1.808	3.46
ENSMUSG00000056383	AI987944	1.943	1.881	3.328
ENSMUSG00000070576	Mn1	-0.5232	2.272	3.387
ENSMUSG00000034311	Kif4	2.168	1.265	3.342
ENSMUSG00000020275	Rel	2.247	1.618	3.329
ENSMUSG00000011632	2310033E01Rik	1.758	2.314	3.337
